# Supplementary material for: Direct full-length RNA sequencing reveals unexpected transcriptome complexity during Caenorhabditis elegans development
Source: HighWire-hosted journal article supplement (doi:10.1101/gr.251512.119), 2020-02-01
Supplement: Supplemental_Table_S1.xlsx [file Supplemental_Table_S1.xlsx]

## Sheet: Table S1
Table S1 List of genomic position of splicing leaders identified with long reads.
Chr	Start	End	Strand	Supporting reads	Gene
chrI	10217	10218	-	2	Y74C9A.3
chrI	10222	10223	-	2	Y74C9A.3
chrI	10225	10226	-	2	Y74C9A.3
chrI	11515	11516	+	2	Y74C9A.2
chrI	11516	11517	+	3	Y74C9A.2
chrI	11517	11518	+	5	Y74C9A.2
chrI	11524	11525	+	2	Y74C9A.2
chrI	11610	11611	+	3	Y74C9A.2
chrI	11615	11616	+	85	Y74C9A.2
chrI	11616	11617	+	12	Y74C9A.2
chrI	11617	11618	+	8	Y74C9A.2
chrI	11618	11619	+	2	Y74C9A.2
chrI	11621	11622	+	2	Y74C9A.2
chrI	11628	11629	+	4	Y74C9A.2
chrI	11629	11630	+	3	Y74C9A.2
chrI	11630	11631	+	8	Y74C9A.2
chrI	11632	11633	+	3	Y74C9A.2
chrI	11643	11644	+	2	Y74C9A.2
chrI	14944	14945	+	8	Y74C9A.2
chrI	14945	14946	+	2	Y74C9A.2
chrI	14949	14950	+	51	Y74C9A.2
chrI	14950	14951	+	4	Y74C9A.2
chrI	14951	14952	+	2	Y74C9A.2
chrI	14952	14953	+	7	Y74C9A.2
chrI	14953	14954	+	4	Y74C9A.2
chrI	14954	14955	+	7	Y74C9A.2
chrI	14955	14956	+	3	Y74C9A.2
chrI	14958	14959	+	5	Y74C9A.2
chrI	14959	14960	+	3	Y74C9A.2
chrI	14961	14962	+	3	Y74C9A.2
chrI	14962	14963	+	3	Y74C9A.2
chrI	14963	14964	+	4	Y74C9A.2
chrI	14967	14968	+	6	Y74C9A.2
chrI	14968	14969	+	2	Y74C9A.2
chrI	14980	14981	+	2	Y74C9A.2
chrI	26680	26681	-	2	Y74C9A.4
chrI	47472	47473	+	3	Y48G1C.12
chrI	49918	49919	+	9	Y48G1C.4
chrI	86293	86294	-	2	Y48G1C.10
chrI	86294	86295	-	2	Y48G1C.10
chrI	90448	90449	+	2	Y48G1C.10
chrI	91401	91402	+	8	Y48G1C.9
chrI	91404	91405	+	2	Y48G1C.9
chrI	91410	91411	+	7	Y48G1C.9
chrI	91412	91413	+	3	Y48G1C.9
chrI	93179	93180	+	2	Y48G1C.1
chrI	109899	109900	-	2	F53G12.1
chrI	109950	109951	-	2	F53G12.1
chrI	109956	109957	-	8	F53G12.1
chrI	109964	109965	-	4	F53G12.1
chrI	110031	110032	-	2	F53G12.1
chrI	110047	110048	-	2	F53G12.1
chrI	110049	110050	-	10	F53G12.1
chrI	110052	110053	-	5	F53G12.1
chrI	110053	110054	-	9	F53G12.1
chrI	110054	110055	-	2	F53G12.1
chrI	110056	110057	-	2	F53G12.1
chrI	110057	110058	-	4	F53G12.1
chrI	110058	110059	-	13	F53G12.1
chrI	111037	111038	+	1308	F53G12.10
chrI	111038	111039	+	88	F53G12.10
chrI	111039	111040	+	112	F53G12.10
chrI	111040	111041	+	28	F53G12.10
chrI	111041	111042	+	32	F53G12.10
chrI	111042	111043	+	46	F53G12.10
chrI	111043	111044	+	58	F53G12.10
chrI	111044	111045	+	36	F53G12.10
chrI	111045	111046	+	60	F53G12.10
chrI	111046	111047	+	27	F53G12.10
chrI	111047	111048	+	13	F53G12.10
chrI	111048	111049	+	42	F53G12.10
chrI	111155	111156	+	4	F53G12.10
chrI	111156	111157	+	28	F53G12.10
chrI	111158	111159	+	46	F53G12.10
chrI	111159	111160	+	14	F53G12.10
chrI	111160	111161	+	3200	F53G12.10
chrI	111161	111162	+	801	F53G12.10
chrI	111162	111163	+	481	F53G12.10
chrI	111163	111164	+	322	F53G12.10
chrI	111164	111165	+	285	F53G12.10
chrI	111165	111166	+	718	F53G12.10
chrI	111166	111167	+	404	F53G12.10
chrI	111167	111168	+	86	F53G12.10
chrI	111168	111169	+	103	F53G12.10
chrI	111169	111170	+	38	F53G12.10
chrI	111170	111171	+	137	F53G12.10
chrI	111171	111172	+	124	F53G12.10
chrI	111172	111173	+	172	F53G12.10
chrI	111173	111174	+	30	F53G12.10
chrI	111174	111175	+	15	F53G12.10
chrI	111175	111176	+	14	F53G12.10
chrI	111176	111177	+	22	F53G12.10
chrI	111177	111178	+	5	F53G12.10
chrI	111178	111179	+	12	F53G12.10
chrI	111179	111180	+	37	F53G12.10
chrI	111180	111181	+	3	F53G12.10
chrI	111181	111182	+	13	F53G12.10
chrI	111182	111183	+	5	F53G12.10
chrI	111183	111184	+	8	F53G12.10
chrI	111184	111185	+	2	F53G12.10
chrI	111189	111190	+	3	F53G12.10
chrI	111190	111191	+	2	F53G12.10
chrI	111192	111193	+	3	F53G12.10
chrI	111194	111195	+	4	F53G12.10
chrI	111197	111198	+	2	F53G12.10
chrI	111198	111199	+	2	F53G12.10
chrI	111200	111201	+	7	F53G12.10
chrI	111203	111204	+	5	F53G12.10
chrI	111204	111205	+	8	F53G12.10
chrI	111207	111208	+	2	F53G12.10
chrI	111209	111210	+	20	F53G12.10
chrI	111214	111215	+	3	F53G12.10
chrI	111218	111219	+	5	F53G12.10
chrI	111503	111504	+	3	F53G12.10
chrI	111507	111508	+	15	F53G12.10
chrI	111508	111509	+	17	F53G12.10
chrI	111509	111510	+	618	F53G12.10
chrI	111510	111511	+	111	F53G12.10
chrI	111511	111512	+	103	F53G12.10
chrI	111512	111513	+	6	F53G12.10
chrI	111513	111514	+	14	F53G12.10
chrI	111514	111515	+	6	F53G12.10
chrI	111515	111516	+	6	F53G12.10
chrI	111516	111517	+	7	F53G12.10
chrI	111517	111518	+	10	F53G12.10
chrI	111518	111519	+	13	F53G12.10
chrI	111519	111520	+	27	F53G12.10
chrI	111520	111521	+	7	F53G12.10
chrI	111521	111522	+	54	F53G12.10
chrI	111522	111523	+	8	F53G12.10
chrI	111523	111524	+	10	F53G12.10
chrI	111524	111525	+	3	F53G12.10
chrI	111525	111526	+	3	F53G12.10
chrI	111527	111528	+	3	F53G12.10
chrI	111529	111530	+	3	F53G12.10
chrI	111531	111532	+	2	F53G12.10
chrI	111536	111537	+	3	F53G12.10
chrI	111537	111538	+	2	F53G12.10
chrI	111538	111539	+	5	F53G12.10
chrI	111539	111540	+	4	F53G12.10
chrI	111540	111541	+	2	F53G12.10
chrI	111541	111542	+	2	F53G12.10
chrI	111543	111544	+	8	F53G12.10
chrI	111547	111548	+	2	F53G12.10
chrI	111549	111550	+	6	F53G12.10
chrI	111550	111551	+	4	F53G12.10
chrI	111552	111553	+	2	F53G12.10
chrI	111555	111556	+	2	F53G12.10
chrI	111558	111559	+	2	F53G12.10
chrI	111559	111560	+	3	F53G12.10
chrI	111560	111561	+	8	F53G12.10
chrI	111561	111562	+	3	F53G12.10
chrI	111562	111563	+	2	F53G12.10
chrI	111564	111565	+	3	F53G12.10
chrI	111565	111566	+	2	F53G12.10
chrI	111579	111580	+	2	F53G12.10
chrI	111582	111583	+	2	F53G12.10
chrI	111589	111590	+	2	F53G12.10
chrI	111606	111607	+	2	F53G12.10
chrI	111660	111661	+	3	F53G12.10
chrI	111752	111753	+	25	F53G12.10
chrI	111757	111758	+	14	F53G12.10
chrI	111767	111768	+	5	F53G12.10
chrI	111774	111775	+	2	F53G12.10
chrI	111776	111777	+	2	F53G12.10
chrI	111778	111779	+	2	F53G12.10
chrI	111779	111780	+	2	F53G12.10
chrI	111841	111842	+	2	F53G12.10
chrI	111848	111849	+	2	F53G12.10
chrI	111851	111852	+	6	F53G12.10
chrI	111852	111853	+	5	F53G12.10
chrI	111855	111856	+	2	F53G12.10
chrI	111857	111858	+	2	F53G12.10
chrI	111858	111859	+	4	F53G12.10
chrI	111873	111874	+	2	F53G12.10
chrI	111912	111913	+	2	F53G12.10
chrI	111917	111918	+	2	F53G12.10
chrI	111919	111920	+	2	F53G12.10
chrI	111920	111921	+	3	F53G12.10
chrI	112017	112018	+	6	F53G12.10
chrI	112018	112019	+	3	F53G12.10
chrI	112020	112021	+	4	F53G12.10
chrI	112031	112032	+	4	F53G12.10
chrI	112042	112043	+	2	F53G12.10
chrI	114080	114081	+	4	F53G12.8
chrI	127383	127384	+	2	F53G12.5
chrI	128689	128690	+	3	F53G12.5
chrI	128690	128691	+	12	F53G12.5
chrI	128694	128695	+	6	F53G12.5
chrI	128695	128696	+	11	F53G12.5
chrI	128696	128697	+	3	F53G12.5
chrI	128698	128699	+	2	F53G12.5
chrI	128699	128700	+	4	F53G12.5
chrI	128701	128702	+	2	F53G12.5
chrI	153681	153682	-	4	F56C11.1
chrI	254670	254671	-	2	Y48G1BR.1
chrI	314976	314977	-	3	C53D5.6
chrI	317586	317587	-	2	Y48G1A.7
chrI	317605	317606	-	4	Y48G1A.7
chrI	323848	323849	+	10	Y48G1A.4
chrI	323852	323853	+	6	Y48G1A.4
chrI	323978	323979	+	2	Y48G1A.4
chrI	347508	347509	+	2	Y48G1A.2
chrI	347508	347509	+	2	Y48G1A.6
chrI	364516	364517	+	7	R119.7
chrI	379073	379074	-	2	R119.4
chrI	379074	379075	-	5	R119.4
chrI	379075	379076	-	2	R119.4
chrI	380129	380130	-	2	R119.4
chrI	381094	381095	-	2	R119.4
chrI	381124	381125	-	2	R119.4
chrI	381219	381220	-	2	R119.4
chrI	381350	381351	-	2	R119.4
chrI	381401	381402	-	2	R119.4
chrI	381453	381454	-	2	R119.4
chrI	381462	381463	-	2	R119.4
chrI	381464	381465	-	4	R119.4
chrI	381466	381467	-	3	R119.4
chrI	381467	381468	-	3	R119.4
chrI	381470	381471	-	10	R119.4
chrI	381879	381880	-	3	R119.4
chrI	381892	381893	-	5	R119.4
chrI	381894	381895	-	2	R119.4
chrI	381897	381898	-	14	R119.4
chrI	381898	381899	-	15	R119.4
chrI	381899	381900	-	3	R119.4
chrI	381900	381901	-	21	R119.4
chrI	394411	394412	-	2	R119.5
chrI	461994	461995	+	4	W04C9.4
chrI	488606	488607	+	3	W04C9.2
chrI	488607	488608	+	2	W04C9.2
chrI	488608	488609	+	3	W04C9.2
chrI	488609	488610	+	3	W04C9.2
chrI	506472	506473	+	2	Y65B4BL.2
chrI	515217	515218	-	2	Y65B4BL.5
chrI	516434	516435	-	2	Y65B4BL.5
chrI	530968	530969	+	18	Y65B4BL.1
chrI	530969	530970	+	3	Y65B4BL.1
chrI	530970	530971	+	2	Y65B4BL.1
chrI	530987	530988	+	3	Y65B4BL.1
chrI	530989	530990	+	2	Y65B4BL.1
chrI	530991	530992	+	7	Y65B4BL.1
chrI	530992	530993	+	6	Y65B4BL.1
chrI	530996	530997	+	2	Y65B4BL.1
chrI	531000	531001	+	2	Y65B4BL.1
chrI	531001	531002	+	2	Y65B4BL.1
chrI	531265	531266	+	3	Y65B4BL.1
chrI	531267	531268	+	3	Y65B4BL.1
chrI	531268	531269	+	2	Y65B4BL.1
chrI	531269	531270	+	2	Y65B4BL.1
chrI	531802	531803	+	2	Y65B4BL.1
chrI	531802	531803	+	2	Y65B4BM.3
chrI	531946	531947	+	2	Y65B4BM.3
chrI	534454	534455	+	3	Y65B4BR.8
chrI	535790	535791	+	198	Y65B4BR.5
chrI	535791	535792	+	9	Y65B4BR.5
chrI	535792	535793	+	4	Y65B4BR.5
chrI	535793	535794	+	9	Y65B4BR.5
chrI	535794	535795	+	18	Y65B4BR.5
chrI	535795	535796	+	3	Y65B4BR.5
chrI	535796	535797	+	20	Y65B4BR.5
chrI	535797	535798	+	48	Y65B4BR.5
chrI	535798	535799	+	59	Y65B4BR.5
chrI	535799	535800	+	6	Y65B4BR.5
chrI	535800	535801	+	40	Y65B4BR.5
chrI	535801	535802	+	88	Y65B4BR.5
chrI	535802	535803	+	6	Y65B4BR.5
chrI	535803	535804	+	41	Y65B4BR.5
chrI	535804	535805	+	5	Y65B4BR.5
chrI	535805	535806	+	5	Y65B4BR.5
chrI	535806	535807	+	20	Y65B4BR.5
chrI	535807	535808	+	21	Y65B4BR.5
chrI	535808	535809	+	9	Y65B4BR.5
chrI	535809	535810	+	7	Y65B4BR.5
chrI	535810	535811	+	13	Y65B4BR.5
chrI	535811	535812	+	3	Y65B4BR.5
chrI	535812	535813	+	7	Y65B4BR.5
chrI	535813	535814	+	20	Y65B4BR.5
chrI	535814	535815	+	7	Y65B4BR.5
chrI	535816	535817	+	2	Y65B4BR.5
chrI	535817	535818	+	2	Y65B4BR.5
chrI	535818	535819	+	2	Y65B4BR.5
chrI	535819	535820	+	2	Y65B4BR.5
chrI	535821	535822	+	2	Y65B4BR.5
chrI	535823	535824	+	5	Y65B4BR.5
chrI	535827	535828	+	2	Y65B4BR.5
chrI	535828	535829	+	2	Y65B4BR.5
chrI	535830	535831	+	2	Y65B4BR.5
chrI	535831	535832	+	2	Y65B4BR.5
chrI	535896	535897	+	303	Y65B4BR.5
chrI	535897	535898	+	4	Y65B4BR.5
chrI	535898	535899	+	26	Y65B4BR.5
chrI	535899	535900	+	7	Y65B4BR.5
chrI	535900	535901	+	8	Y65B4BR.5
chrI	535901	535902	+	35	Y65B4BR.5
chrI	535903	535904	+	19	Y65B4BR.5
chrI	535904	535905	+	5	Y65B4BR.5
chrI	535905	535906	+	23	Y65B4BR.5
chrI	535906	535907	+	20	Y65B4BR.5
chrI	535907	535908	+	3	Y65B4BR.5
chrI	535908	535909	+	5	Y65B4BR.5
chrI	535911	535912	+	2	Y65B4BR.5
chrI	535912	535913	+	2	Y65B4BR.5
chrI	535913	535914	+	4	Y65B4BR.5
chrI	535914	535915	+	3	Y65B4BR.5
chrI	535915	535916	+	10	Y65B4BR.5
chrI	535916	535917	+	10	Y65B4BR.5
chrI	535919	535920	+	3	Y65B4BR.5
chrI	535921	535922	+	2	Y65B4BR.5
chrI	535926	535927	+	3	Y65B4BR.5
chrI	535975	535976	+	2	Y65B4BR.5
chrI	536001	536002	+	2	Y65B4BR.5
chrI	536011	536012	+	2	Y65B4BR.5
chrI	536033	536034	+	2	Y65B4BR.5
chrI	557457	557458	+	3	Y65B4BR.2
chrI	615988	615989	-	2	F56A6.4
chrI	618191	618192	+	2	F56A6.1
chrI	618191	618192	+	2	F56A6.4
chrI	618412	618413	+	6	F56A6.1
chrI	618412	618413	+	6	F56A6.4
chrI	619392	619393	+	2	F56A6.1
chrI	619392	619393	+	2	F56A6.4
chrI	636892	636893	+	2	Y65B4A.3
chrI	636906	636907	+	2	Y65B4A.3
chrI	636918	636919	+	2	Y65B4A.3
chrI	636930	636931	+	2	Y65B4A.3
chrI	637063	637064	+	4	Y65B4A.3
chrI	637395	637396	+	2	Y65B4A.3
chrI	645442	645443	+	2	Y65B4A.2
chrI	645451	645452	+	3	Y65B4A.2
chrI	654113	654114	+	2	Y65B4A.1
chrI	654121	654122	+	2	Y65B4A.1
chrI	654124	654125	+	2	Y65B4A.1
chrI	693842	693843	-	4	Y18H1A.4
chrI	693843	693844	-	3	Y18H1A.4
chrI	693845	693846	-	6	Y18H1A.4
chrI	693846	693847	-	4	Y18H1A.4
chrI	693847	693848	-	15	Y18H1A.4
chrI	694630	694631	-	2	Y18H1A.4
chrI	694632	694633	-	5	Y18H1A.4
chrI	694642	694643	-	2	Y18H1A.4
chrI	694646	694647	-	6	Y18H1A.4
chrI	694648	694649	-	2	Y18H1A.4
chrI	694650	694651	-	3	Y18H1A.4
chrI	694651	694652	-	63	Y18H1A.4
chrI	694652	694653	-	5	Y18H1A.4
chrI	694655	694656	-	7	Y18H1A.4
chrI	715872	715873	-	4	Y18H1A.3
chrI	853450	853451	+	2	Y95B8A.8
chrI	883000	883001	+	2	Y95B8A.6
chrI	973121	973122	-	4	F54A5.3
chrI	1016402	1016403	+	151	C54G6.5
chrI	1016403	1016404	+	16	C54G6.5
chrI	1016405	1016406	+	2	C54G6.5
chrI	1016406	1016407	+	27	C54G6.5
chrI	1016423	1016424	+	2	C54G6.5
chrI	1016464	1016465	+	2	C54G6.5
chrI	1016465	1016466	+	2	C54G6.5
chrI	1016929	1016930	+	54	C54G6.5
chrI	1016930	1016931	+	13	C54G6.5
chrI	1016931	1016932	+	6	C54G6.5
chrI	1016933	1016934	+	8	C54G6.5
chrI	1016935	1016936	+	5	C54G6.5
chrI	1016936	1016937	+	3	C54G6.5
chrI	1016937	1016938	+	4	C54G6.5
chrI	1016942	1016943	+	3	C54G6.5
chrI	1018834	1018835	+	43	Y34D9A.11
chrI	1018835	1018836	+	2	Y34D9A.11
chrI	1018836	1018837	+	2	Y34D9A.11
chrI	1034447	1034448	+	2	Y34D9A.3
chrI	1049595	1049596	+	22	Y34D9A.6
chrI	1049596	1049597	+	82	Y34D9A.6
chrI	1049597	1049598	+	13	Y34D9A.6
chrI	1049604	1049605	+	4	Y34D9A.6
chrI	1049606	1049607	+	3	Y34D9A.6
chrI	1049608	1049609	+	3	Y34D9A.6
chrI	1049609	1049610	+	3	Y34D9A.6
chrI	1049610	1049611	+	2	Y34D9A.6
chrI	1049615	1049616	+	2	Y34D9A.6
chrI	1049616	1049617	+	8	Y34D9A.6
chrI	1049617	1049618	+	3	Y34D9A.6
chrI	1049618	1049619	+	2	Y34D9A.6
chrI	1049619	1049620	+	2	Y34D9A.6
chrI	1049620	1049621	+	3	Y34D9A.6
chrI	1050402	1050403	+	20	Y34D9A.6
chrI	1050403	1050404	+	2	Y34D9A.6
chrI	1050404	1050405	+	3	Y34D9A.6
chrI	1050406	1050407	+	2	Y34D9A.6
chrI	1050408	1050409	+	3	Y34D9A.6
chrI	1050409	1050410	+	2	Y34D9A.6
chrI	1050410	1050411	+	3	Y34D9A.6
chrI	1050415	1050416	+	3	Y34D9A.6
chrI	1087249	1087250	+	2	R06A10.1
chrI	1155711	1155712	-	2	Y48G8AL.14
chrI	1156018	1156019	-	2	Y48G8AL.14
chrI	1156578	1156579	+	637	Y48G8AL.8
chrI	1156579	1156580	+	50	Y48G8AL.8
chrI	1156580	1156581	+	20	Y48G8AL.8
chrI	1156581	1156582	+	2	Y48G8AL.8
chrI	1156582	1156583	+	13	Y48G8AL.8
chrI	1156583	1156584	+	5	Y48G8AL.8
chrI	1156584	1156585	+	67	Y48G8AL.8
chrI	1156585	1156586	+	58	Y48G8AL.8
chrI	1156586	1156587	+	70	Y48G8AL.8
chrI	1156587	1156588	+	111	Y48G8AL.8
chrI	1156588	1156589	+	16	Y48G8AL.8
chrI	1156589	1156590	+	355	Y48G8AL.8
chrI	1156590	1156591	+	210	Y48G8AL.8
chrI	1156591	1156592	+	231	Y48G8AL.8
chrI	1156592	1156593	+	145	Y48G8AL.8
chrI	1156593	1156594	+	83	Y48G8AL.8
chrI	1156594	1156595	+	72	Y48G8AL.8
chrI	1156595	1156596	+	207	Y48G8AL.8
chrI	1156596	1156597	+	96	Y48G8AL.8
chrI	1156597	1156598	+	318	Y48G8AL.8
chrI	1156598	1156599	+	103	Y48G8AL.8
chrI	1156599	1156600	+	25	Y48G8AL.8
chrI	1156600	1156601	+	5	Y48G8AL.8
chrI	1156601	1156602	+	46	Y48G8AL.8
chrI	1156602	1156603	+	55	Y48G8AL.8
chrI	1156603	1156604	+	9	Y48G8AL.8
chrI	1156606	1156607	+	2	Y48G8AL.8
chrI	1156607	1156608	+	14	Y48G8AL.8
chrI	1156609	1156610	+	10	Y48G8AL.8
chrI	1156610	1156611	+	3	Y48G8AL.8
chrI	1156611	1156612	+	35	Y48G8AL.8
chrI	1156612	1156613	+	10	Y48G8AL.8
chrI	1156614	1156615	+	19	Y48G8AL.8
chrI	1156615	1156616	+	12	Y48G8AL.8
chrI	1156616	1156617	+	3	Y48G8AL.8
chrI	1156618	1156619	+	7	Y48G8AL.8
chrI	1156619	1156620	+	26	Y48G8AL.8
chrI	1156622	1156623	+	8	Y48G8AL.8
chrI	1156623	1156624	+	3	Y48G8AL.8
chrI	1156624	1156625	+	3	Y48G8AL.8
chrI	1156625	1156626	+	3	Y48G8AL.8
chrI	1156626	1156627	+	5	Y48G8AL.8
chrI	1156628	1156629	+	5	Y48G8AL.8
chrI	1156634	1156635	+	3	Y48G8AL.8
chrI	1156637	1156638	+	3	Y48G8AL.8
chrI	1156638	1156639	+	2	Y48G8AL.8
chrI	1156643	1156644	+	2	Y48G8AL.8
chrI	1156644	1156645	+	3	Y48G8AL.8
chrI	1156645	1156646	+	5	Y48G8AL.8
chrI	1156647	1156648	+	2	Y48G8AL.8
chrI	1156648	1156649	+	5	Y48G8AL.8
chrI	1156649	1156650	+	2	Y48G8AL.8
chrI	1156656	1156657	+	2	Y48G8AL.8
chrI	1156668	1156669	+	3	Y48G8AL.8
chrI	1156672	1156673	+	2	Y48G8AL.8
chrI	1156677	1156678	+	5	Y48G8AL.8
chrI	1156678	1156679	+	2	Y48G8AL.8
chrI	1156680	1156681	+	2	Y48G8AL.8
chrI	1156682	1156683	+	3	Y48G8AL.8
chrI	1156688	1156689	+	8	Y48G8AL.8
chrI	1156689	1156690	+	4	Y48G8AL.8
chrI	1156691	1156692	+	5	Y48G8AL.8
chrI	1156693	1156694	+	3	Y48G8AL.8
chrI	1156700	1156701	+	2	Y48G8AL.8
chrI	1156710	1156711	+	2	Y48G8AL.8
chrI	1156712	1156713	+	9	Y48G8AL.8
chrI	1156714	1156715	+	2	Y48G8AL.8
chrI	1156718	1156719	+	3	Y48G8AL.8
chrI	1156720	1156721	+	4	Y48G8AL.8
chrI	1156721	1156722	+	3	Y48G8AL.8
chrI	1156724	1156725	+	3	Y48G8AL.8
chrI	1156725	1156726	+	10	Y48G8AL.8
chrI	1156728	1156729	+	3	Y48G8AL.8
chrI	1156729	1156730	+	2	Y48G8AL.8
chrI	1156731	1156732	+	4	Y48G8AL.8
chrI	1156733	1156734	+	7	Y48G8AL.8
chrI	1156751	1156752	+	3	Y48G8AL.8
chrI	1156754	1156755	+	2	Y48G8AL.8
chrI	1156756	1156757	+	3	Y48G8AL.8
chrI	1156757	1156758	+	3	Y48G8AL.8
chrI	1156780	1156781	+	2	Y48G8AL.8
chrI	1156782	1156783	+	4	Y48G8AL.8
chrI	1156791	1156792	+	2	Y48G8AL.8
chrI	1156806	1156807	+	3	Y48G8AL.8
chrI	1156808	1156809	+	2	Y48G8AL.8
chrI	1156813	1156814	+	2	Y48G8AL.8
chrI	1156962	1156963	+	3	Y48G8AL.8
chrI	1156963	1156964	+	2	Y48G8AL.8
chrI	1156970	1156971	+	92	Y48G8AL.8
chrI	1156971	1156972	+	2	Y48G8AL.8
chrI	1156972	1156973	+	2	Y48G8AL.8
chrI	1156977	1156978	+	3	Y48G8AL.8
chrI	1156978	1156979	+	5	Y48G8AL.8
chrI	1157007	1157008	+	3	Y48G8AL.8
chrI	1157010	1157011	+	2	Y48G8AL.8
chrI	1157011	1157012	+	2	Y48G8AL.8
chrI	1157021	1157022	+	2	Y48G8AL.8
chrI	1157275	1157276	+	2	Y48G8AL.8
chrI	1157293	1157294	+	2	Y48G8AL.8
chrI	1175823	1175824	-	2	Y48G8AL.11
chrI	1225534	1225535	-	3	Y48G8AL.13
chrI	1225534	1225535	-	3	Y48G8AL.1
chrI	1225536	1225537	-	2	Y48G8AL.13
chrI	1225536	1225537	-	2	Y48G8AL.1
chrI	1226800	1226801	-	3	Y48G8AL.13
chrI	1226800	1226801	-	3	Y48G8AL.1
chrI	1226803	1226804	-	3	Y48G8AL.13
chrI	1226803	1226804	-	3	Y48G8AL.1
chrI	1226809	1226810	-	37	Y48G8AL.13
chrI	1226809	1226810	-	37	Y48G8AL.1
chrI	1226810	1226811	-	3	Y48G8AL.13
chrI	1226810	1226811	-	3	Y48G8AL.1
chrI	1226811	1226812	-	22	Y48G8AL.13
chrI	1226811	1226812	-	22	Y48G8AL.1
chrI	1226812	1226813	-	13	Y48G8AL.13
chrI	1226812	1226813	-	13	Y48G8AL.1
chrI	1226813	1226814	-	68	Y48G8AL.13
chrI	1226813	1226814	-	68	Y48G8AL.1
chrI	1226815	1226816	-	2	Y48G8AL.13
chrI	1226815	1226816	-	2	Y48G8AL.1
chrI	1226819	1226820	-	3	Y48G8AL.13
chrI	1226819	1226820	-	3	Y48G8AL.1
chrI	1227859	1227860	-	2	Y48G8AL.1
chrI	1227859	1227860	-	2	Y48G8AL.13
chrI	1233092	1233093	-	2	Y48G8AL.1
chrI	1259672	1259673	-	2	Y48G8AR.1
chrI	1337016	1337017	+	10	K12C11.6
chrI	1337017	1337018	+	3	K12C11.6
chrI	1338783	1338784	+	4	K12C11.7
chrI	1340682	1340683	+	6	K12C11.2
chrI	1340683	1340684	+	6	K12C11.2
chrI	1340684	1340685	+	2	K12C11.2
chrI	1340689	1340690	+	8	K12C11.2
chrI	1340697	1340698	+	2	K12C11.2
chrI	1340821	1340822	+	2	K12C11.2
chrI	1344685	1344686	-	3	K12C11.1
chrI	1365310	1365311	+	2	Y92H12BL.5
chrI	1415483	1415484	-	2	Y92H12BR.2
chrI	1415633	1415634	-	2	Y92H12BR.2
chrI	1415637	1415638	-	2	Y92H12BR.2
chrI	1415648	1415649	-	7	Y92H12BR.2
chrI	1415794	1415795	-	2	Y92H12BR.2
chrI	1415795	1415796	-	3	Y92H12BR.2
chrI	1415799	1415800	-	2	Y92H12BR.2
chrI	1415805	1415806	-	5	Y92H12BR.2
chrI	1416585	1416586	+	2	Y92H12BR.3
chrI	1416586	1416587	+	3	Y92H12BR.3
chrI	1416792	1416793	+	2	Y92H12BR.3
chrI	1471300	1471301	+	2	F47G6.2
chrI	1475545	1475546	+	2	F47G6.2
chrI	1490974	1490975	-	2	Y92H12A.5
chrI	1601838	1601839	+	2	Y73E7A.2
chrI	1610038	1610039	-	2	Y73E7A.6
chrI	1629002	1629003	+	7	Y73E7A.1
chrI	1629003	1629004	+	3	Y73E7A.1
chrI	1629006	1629007	+	8	Y73E7A.1
chrI	1629007	1629008	+	2	Y73E7A.1
chrI	1629008	1629009	+	3	Y73E7A.1
chrI	1667659	1667660	+	2	Y71G12B.17
chrI	1668161	1668162	+	4	Y71G12B.17
chrI	1698346	1698347	+	20	Y71G12B.15
chrI	1698347	1698348	+	2	Y71G12B.15
chrI	1698349	1698350	+	8	Y71G12B.15
chrI	1698359	1698360	+	2	Y71G12B.15
chrI	1751482	1751483	+	6	Y71G12B.10
chrI	1751487	1751488	+	2	Y71G12B.10
chrI	1751643	1751644	+	2	Y71G12B.10
chrI	1755338	1755339	+	2	Y71G12B.9
chrI	1775901	1775902	-	2	Y71G12B.25
chrI	1775901	1775902	-	2	Y71G12B.8
chrI	1775930	1775931	-	3	Y71G12B.25
chrI	1775930	1775931	-	3	Y71G12B.8
chrI	1775931	1775932	-	3	Y71G12B.25
chrI	1775931	1775932	-	3	Y71G12B.8
chrI	1775934	1775935	-	12	Y71G12B.8
chrI	1775938	1775939	-	22	Y71G12B.8
chrI	1793255	1793256	+	5	Y71G12B.6
chrI	1793256	1793257	+	2	Y71G12B.6
chrI	1793790	1793791	+	2	Y71G12B.6
chrI	1798682	1798683	-	2	Y71G12B.27
chrI	1798684	1798685	-	4	Y71G12B.27
chrI	1808113	1808114	+	5	Y71G12B.4
chrI	1808130	1808131	+	2	Y71G12B.4
chrI	1808135	1808136	+	2	Y71G12B.4
chrI	1809450	1809451	+	6	Y71G12B.4
chrI	1809483	1809484	+	2	Y71G12B.4
chrI	1812901	1812902	+	3	Y71G12B.3
chrI	1812902	1812903	+	2	Y71G12B.3
chrI	1812911	1812912	+	2	Y71G12B.3
chrI	1832422	1832423	-	2	C53H9.3
chrI	1834185	1834186	+	2	C53H9.2
chrI	1834880	1834881	+	4999	C53H9.1
chrI	1834881	1834882	+	619	C53H9.1
chrI	1834882	1834883	+	642	C53H9.1
chrI	1834883	1834884	+	142	C53H9.1
chrI	1834884	1834885	+	251	C53H9.1
chrI	1834885	1834886	+	258	C53H9.1
chrI	1834886	1834887	+	34	C53H9.1
chrI	1834887	1834888	+	25	C53H9.1
chrI	1834888	1834889	+	36	C53H9.1
chrI	1834889	1834890	+	109	C53H9.1
chrI	1834890	1834891	+	327	C53H9.1
chrI	1834891	1834892	+	155	C53H9.1
chrI	1834892	1834893	+	9	C53H9.1
chrI	1834893	1834894	+	13	C53H9.1
chrI	1834894	1834895	+	23	C53H9.1
chrI	1834895	1834896	+	126	C53H9.1
chrI	1834896	1834897	+	22	C53H9.1
chrI	1834897	1834898	+	4	C53H9.1
chrI	1834898	1834899	+	6	C53H9.1
chrI	1834899	1834900	+	21	C53H9.1
chrI	1834900	1834901	+	6	C53H9.1
chrI	1834902	1834903	+	25	C53H9.1
chrI	1834903	1834904	+	2	C53H9.1
chrI	1834904	1834905	+	6	C53H9.1
chrI	1834907	1834908	+	2	C53H9.1
chrI	1834910	1834911	+	9	C53H9.1
chrI	1834911	1834912	+	3	C53H9.1
chrI	1834912	1834913	+	20	C53H9.1
chrI	1834914	1834915	+	3	C53H9.1
chrI	1834916	1834917	+	2	C53H9.1
chrI	1834919	1834920	+	2	C53H9.1
chrI	1834927	1834928	+	2	C53H9.1
chrI	1834930	1834931	+	7	C53H9.1
chrI	1834933	1834934	+	3	C53H9.1
chrI	1834934	1834935	+	6	C53H9.1
chrI	1834936	1834937	+	4	C53H9.1
chrI	1834939	1834940	+	2	C53H9.1
chrI	1834942	1834943	+	4	C53H9.1
chrI	1834948	1834949	+	4	C53H9.1
chrI	1834950	1834951	+	3	C53H9.1
chrI	1834951	1834952	+	6	C53H9.1
chrI	1834952	1834953	+	2	C53H9.1
chrI	1834953	1834954	+	2	C53H9.1
chrI	1834955	1834956	+	2	C53H9.1
chrI	1834956	1834957	+	5	C53H9.1
chrI	1834958	1834959	+	3	C53H9.1
chrI	1834959	1834960	+	2	C53H9.1
chrI	1834964	1834965	+	2	C53H9.1
chrI	1834965	1834966	+	2	C53H9.1
chrI	1834966	1834967	+	3	C53H9.1
chrI	1834969	1834970	+	2	C53H9.1
chrI	1834974	1834975	+	3	C53H9.1
chrI	1834980	1834981	+	3	C53H9.1
chrI	1834981	1834982	+	2	C53H9.1
chrI	1834982	1834983	+	3	C53H9.1
chrI	1834989	1834990	+	2	C53H9.1
chrI	1835089	1835090	+	117	C53H9.1
chrI	1835090	1835091	+	8	C53H9.1
chrI	1835091	1835092	+	16	C53H9.1
chrI	1835092	1835093	+	3	C53H9.1
chrI	1835095	1835096	+	5	C53H9.1
chrI	1835096	1835097	+	6	C53H9.1
chrI	1835097	1835098	+	2	C53H9.1
chrI	1835099	1835100	+	4	C53H9.1
chrI	1835100	1835101	+	2	C53H9.1
chrI	1835104	1835105	+	4	C53H9.1
chrI	1835109	1835110	+	6	C53H9.1
chrI	1835120	1835121	+	2	C53H9.1
chrI	1835122	1835123	+	2	C53H9.1
chrI	1835169	1835170	+	2	C53H9.1
chrI	1835274	1835275	+	3	C53H9.1
chrI	1842456	1842457	+	2	M01D7.6
chrI	1842469	1842470	+	2	M01D7.6
chrI	1843393	1843394	+	4	M01D7.5
chrI	1843541	1843542	+	3	M01D7.5
chrI	1843653	1843654	+	2	M01D7.5
chrI	1846341	1846342	+	2	M01D7.4
chrI	1913846	1913847	-	2	Y51F10.7
chrI	1913846	1913847	-	2	Y71G12A.2
chrI	1913858	1913859	-	5	Y51F10.7
chrI	1913858	1913859	-	5	Y71G12A.2
chrI	1913897	1913898	-	2	Y51F10.7
chrI	1913897	1913898	-	2	Y71G12A.2
chrI	1913898	1913899	-	3	Y51F10.7
chrI	1913898	1913899	-	3	Y71G12A.2
chrI	1913903	1913904	-	2	Y51F10.7
chrI	1913903	1913904	-	2	Y71G12A.2
chrI	1913904	1913905	-	3	Y51F10.7
chrI	1913904	1913905	-	3	Y71G12A.2
chrI	1913907	1913908	-	13	Y51F10.7
chrI	1913907	1913908	-	13	Y71G12A.2
chrI	1913910	1913911	-	8	Y51F10.7
chrI	1913910	1913911	-	8	Y71G12A.2
chrI	1913911	1913912	-	18	Y51F10.7
chrI	1913911	1913912	-	18	Y71G12A.2
chrI	1913912	1913913	-	14	Y51F10.7
chrI	1913912	1913913	-	14	Y71G12A.2
chrI	1913915	1913916	-	9	Y51F10.7
chrI	1913915	1913916	-	9	Y71G12A.2
chrI	1913917	1913918	-	10	Y51F10.7
chrI	1913917	1913918	-	10	Y71G12A.2
chrI	1913918	1913919	-	9	Y51F10.7
chrI	1913918	1913919	-	9	Y71G12A.2
chrI	1913919	1913920	-	14	Y51F10.7
chrI	1913919	1913920	-	14	Y71G12A.2
chrI	1913922	1913923	-	6	Y51F10.7
chrI	1913922	1913923	-	6	Y71G12A.2
chrI	1913923	1913924	-	2	Y51F10.7
chrI	1913923	1913924	-	2	Y71G12A.2
chrI	1958165	1958166	-	2	Y51F10.10
chrI	1978038	1978039	+	2	Y51F10.2
chrI	1978518	1978519	+	2	Y51F10.2
chrI	2026313	2026314	+	2	Y20F4.2
chrI	2026317	2026318	+	3	Y20F4.2
chrI	2039686	2039687	-	2	Y20F4.4
chrI	2039688	2039689	-	2	Y20F4.4
chrI	2039689	2039690	-	3	Y20F4.4
chrI	2039690	2039691	-	3	Y20F4.4
chrI	2039694	2039695	-	5	Y20F4.4
chrI	2039698	2039699	-	19	Y20F4.4
chrI	2039699	2039700	-	5	Y20F4.4
chrI	2043700	2043701	-	3	Y20F4.4
chrI	2063981	2063982	-	3	Y37E3.1
chrI	2064031	2064032	-	2	Y37E3.1
chrI	2064293	2064294	+	3	Y37E3.3
chrI	2064299	2064300	+	2	Y37E3.3
chrI	2064300	2064301	+	4	Y37E3.3
chrI	2064968	2064969	+	13	Y37E3.4
chrI	2064969	2064970	+	7	Y37E3.4
chrI	2064972	2064973	+	4	Y37E3.4
chrI	2064973	2064974	+	55	Y37E3.4
chrI	2064974	2064975	+	6	Y37E3.4
chrI	2064975	2064976	+	25	Y37E3.4
chrI	2064976	2064977	+	19	Y37E3.4
chrI	2064982	2064983	+	5	Y37E3.4
chrI	2064984	2064985	+	2	Y37E3.4
chrI	2064985	2064986	+	2	Y37E3.4
chrI	2064986	2064987	+	2	Y37E3.4
chrI	2064987	2064988	+	4	Y37E3.4
chrI	2069293	2069294	-	2	Y37E3.7
chrI	2069294	2069295	-	18	Y37E3.7
chrI	2069394	2069395	-	2	Y37E3.7
chrI	2069426	2069427	-	2	Y37E3.7
chrI	2069461	2069462	-	2	Y37E3.7
chrI	2069465	2069466	-	2	Y37E3.7
chrI	2069473	2069474	-	2	Y37E3.7
chrI	2069488	2069489	-	6	Y37E3.7
chrI	2069497	2069498	-	4	Y37E3.7
chrI	2069498	2069499	-	2	Y37E3.7
chrI	2069499	2069500	-	2	Y37E3.7
chrI	2069500	2069501	-	5	Y37E3.7
chrI	2069502	2069503	-	2	Y37E3.7
chrI	2069504	2069505	-	6	Y37E3.7
chrI	2069505	2069506	-	17	Y37E3.7
chrI	2069506	2069507	-	17	Y37E3.7
chrI	2069507	2069508	-	4	Y37E3.7
chrI	2069511	2069512	-	2	Y37E3.7
chrI	2069512	2069513	-	3	Y37E3.7
chrI	2069513	2069514	-	4	Y37E3.7
chrI	2069514	2069515	-	11	Y37E3.7
chrI	2069515	2069516	-	43	Y37E3.7
chrI	2069516	2069517	-	5	Y37E3.7
chrI	2069517	2069518	-	16	Y37E3.7
chrI	2069518	2069519	-	82	Y37E3.7
chrI	2069519	2069520	-	42	Y37E3.7
chrI	2069520	2069521	-	19	Y37E3.7
chrI	2069521	2069522	-	6	Y37E3.7
chrI	2069522	2069523	-	14	Y37E3.7
chrI	2069523	2069524	-	35	Y37E3.7
chrI	2069524	2069525	-	9	Y37E3.7
chrI	2069525	2069526	-	34	Y37E3.7
chrI	2069526	2069527	-	11	Y37E3.7
chrI	2069527	2069528	-	4	Y37E3.7
chrI	2069528	2069529	-	22	Y37E3.7
chrI	2069529	2069530	-	3	Y37E3.7
chrI	2069530	2069531	-	4	Y37E3.7
chrI	2069531	2069532	-	24	Y37E3.7
chrI	2069532	2069533	-	9	Y37E3.7
chrI	2069533	2069534	-	5	Y37E3.7
chrI	2069534	2069535	-	2	Y37E3.7
chrI	2069537	2069538	-	38	Y37E3.7
chrI	2069538	2069539	-	23	Y37E3.7
chrI	2069539	2069540	-	20	Y37E3.7
chrI	2069540	2069541	-	130	Y37E3.7
chrI	2069541	2069542	-	27	Y37E3.7
chrI	2069542	2069543	-	18	Y37E3.7
chrI	2069543	2069544	-	12	Y37E3.7
chrI	2069544	2069545	-	3	Y37E3.7
chrI	2069545	2069546	-	19	Y37E3.7
chrI	2069546	2069547	-	10	Y37E3.7
chrI	2069547	2069548	-	33	Y37E3.7
chrI	2069548	2069549	-	6	Y37E3.7
chrI	2069549	2069550	-	93	Y37E3.7
chrI	2069550	2069551	-	45	Y37E3.7
chrI	2069551	2069552	-	10	Y37E3.7
chrI	2069552	2069553	-	23	Y37E3.7
chrI	2069553	2069554	-	51	Y37E3.7
chrI	2069554	2069555	-	3	Y37E3.7
chrI	2069555	2069556	-	85	Y37E3.7
chrI	2069556	2069557	-	14	Y37E3.7
chrI	2069557	2069558	-	11	Y37E3.7
chrI	2069558	2069559	-	62	Y37E3.7
chrI	2069559	2069560	-	21	Y37E3.7
chrI	2069560	2069561	-	8	Y37E3.7
chrI	2069561	2069562	-	5	Y37E3.7
chrI	2069562	2069563	-	10	Y37E3.7
chrI	2069563	2069564	-	30	Y37E3.7
chrI	2069564	2069565	-	6	Y37E3.7
chrI	2069565	2069566	-	206	Y37E3.7
chrI	2069566	2069567	-	52	Y37E3.7
chrI	2069567	2069568	-	189	Y37E3.7
chrI	2069568	2069569	-	646	Y37E3.7
chrI	2069569	2069570	-	229	Y37E3.7
chrI	2069570	2069571	-	14	Y37E3.7
chrI	2069571	2069572	-	92	Y37E3.7
chrI	2069572	2069573	-	18	Y37E3.7
chrI	2069573	2069574	-	64	Y37E3.7
chrI	2069574	2069575	-	52	Y37E3.7
chrI	2069575	2069576	-	105	Y37E3.7
chrI	2069576	2069577	-	2247	Y37E3.7
chrI	2069577	2069578	-	177	Y37E3.7
chrI	2069578	2069579	-	19	Y37E3.7
chrI	2069579	2069580	-	59	Y37E3.7
chrI	2069580	2069581	-	79	Y37E3.7
chrI	2069581	2069582	-	28	Y37E3.7
chrI	2070196	2070197	-	4	Y37E3.8
chrI	2070198	2070199	-	3	Y37E3.8
chrI	2070204	2070205	-	3	Y37E3.8
chrI	2070205	2070206	-	2	Y37E3.8
chrI	2070206	2070207	-	8	Y37E3.8
chrI	2070207	2070208	-	2	Y37E3.8
chrI	2070208	2070209	-	111	Y37E3.8
chrI	2070538	2070539	-	3	Y37E3.8
chrI	2070545	2070546	-	3	Y37E3.8
chrI	2070548	2070549	-	5	Y37E3.8
chrI	2070549	2070550	-	3	Y37E3.8
chrI	2070551	2070552	-	2	Y37E3.8
chrI	2070553	2070554	-	12	Y37E3.8
chrI	2070554	2070555	-	4	Y37E3.8
chrI	2070555	2070556	-	9	Y37E3.8
chrI	2070556	2070557	-	2	Y37E3.8
chrI	2070558	2070559	-	3	Y37E3.8
chrI	2070560	2070561	-	3	Y37E3.8
chrI	2070562	2070563	-	8	Y37E3.8
chrI	2070563	2070564	-	2	Y37E3.8
chrI	2070565	2070566	-	4	Y37E3.8
chrI	2070566	2070567	-	3	Y37E3.8
chrI	2070568	2070569	-	3	Y37E3.8
chrI	2070569	2070570	-	2	Y37E3.8
chrI	2070570	2070571	-	4	Y37E3.8
chrI	2070572	2070573	-	5	Y37E3.8
chrI	2070575	2070576	-	15	Y37E3.8
chrI	2070576	2070577	-	2	Y37E3.8
chrI	2070577	2070578	-	6	Y37E3.8
chrI	2070579	2070580	-	5	Y37E3.8
chrI	2070580	2070581	-	2	Y37E3.8
chrI	2070581	2070582	-	6	Y37E3.8
chrI	2070582	2070583	-	6	Y37E3.8
chrI	2070583	2070584	-	3	Y37E3.8
chrI	2070584	2070585	-	13	Y37E3.8
chrI	2070585	2070586	-	27	Y37E3.8
chrI	2070586	2070587	-	79	Y37E3.8
chrI	2070587	2070588	-	51	Y37E3.8
chrI	2070588	2070589	-	110	Y37E3.8
chrI	2070589	2070590	-	9	Y37E3.8
chrI	2070590	2070591	-	51	Y37E3.8
chrI	2070591	2070592	-	3	Y37E3.8
chrI	2070592	2070593	-	8	Y37E3.8
chrI	2070593	2070594	-	119	Y37E3.8
chrI	2070595	2070596	-	12	Y37E3.8
chrI	2070596	2070597	-	12	Y37E3.8
chrI	2070597	2070598	-	135	Y37E3.8
chrI	2070598	2070599	-	81	Y37E3.8
chrI	2070599	2070600	-	13	Y37E3.8
chrI	2070600	2070601	-	71	Y37E3.8
chrI	2070601	2070602	-	15	Y37E3.8
chrI	2070602	2070603	-	87	Y37E3.8
chrI	2071351	2071352	+	3	Y37E3.9
chrI	2071353	2071354	+	2	Y37E3.9
chrI	2071364	2071365	+	3	Y37E3.9
chrI	2076105	2076106	+	2	Y37E3.10
chrI	2078958	2078959	+	8	Y37E3.11
chrI	2085244	2085245	+	2	Y37E3.11
chrI	2118531	2118532	-	3	Y37E3.16
chrI	2118531	2118532	-	3	Y37E3.15
chrI	2222197	2222198	-	2	W03F11.1
chrI	2222201	2222202	-	7	W03F11.1
chrI	2222202	2222203	-	2	W03F11.1
chrI	2222294	2222295	-	2	W03F11.1
chrI	2289740	2289741	-	2	Y39G10AL.3
chrI	2289754	2289755	-	3	Y39G10AL.3
chrI	2291143	2291144	-	3	Y39G10AL.3
chrI	2300083	2300084	+	3	Y39G10AR.12
chrI	2300084	2300085	+	2	Y39G10AR.12
chrI	2300717	2300718	+	3	Y39G10AR.12
chrI	2300717	2300718	+	3	Y39G10AR.10
chrI	2300856	2300857	+	4	Y39G10AR.12
chrI	2300856	2300857	+	4	Y39G10AR.10
chrI	2306650	2306651	-	2	Y39G10AR.13
chrI	2307012	2307013	+	2	Y39G10AR.9
chrI	2307401	2307402	+	6	Y39G10AR.9
chrI	2307403	2307404	+	2	Y39G10AR.9
chrI	2307405	2307406	+	2	Y39G10AR.9
chrI	2308973	2308974	+	2	Y39G10AR.9
chrI	2313273	2313274	+	2	Y39G10AR.8
chrI	2313276	2313277	+	2	Y39G10AR.8
chrI	2313279	2313280	+	2	Y39G10AR.8
chrI	2313373	2313374	+	32	Y39G10AR.8
chrI	2313374	2313375	+	3	Y39G10AR.8
chrI	2321818	2321819	-	2	Y39G10AR.14
chrI	2322556	2322557	-	2	Y39G10AR.32
chrI	2322558	2322559	-	5	Y39G10AR.32
chrI	2402232	2402233	+	3	Y39G10AR.2
chrI	2420039	2420040	-	12	F23C8.5
chrI	2420043	2420044	-	2	F23C8.5
chrI	2420341	2420342	-	2	F23C8.5
chrI	2420346	2420347	-	11	F23C8.5
chrI	2420348	2420349	-	4	F23C8.5
chrI	2420351	2420352	-	3	F23C8.5
chrI	2420353	2420354	-	3	F23C8.5
chrI	2420354	2420355	-	9	F23C8.5
chrI	2421594	2421595	-	3	F23C8.6
chrI	2421604	2421605	-	14	F23C8.6
chrI	2421693	2421694	-	2	F23C8.6
chrI	2421704	2421705	-	2	F23C8.6
chrI	2421706	2421707	-	3	F23C8.6
chrI	2421715	2421716	-	3	F23C8.6
chrI	2421722	2421723	-	3	F23C8.6
chrI	2421723	2421724	-	9	F23C8.6
chrI	2421725	2421726	-	4	F23C8.6
chrI	2421726	2421727	-	6	F23C8.6
chrI	2421732	2421733	-	10	F23C8.6
chrI	2421733	2421734	-	2	F23C8.6
chrI	2421734	2421735	-	16	F23C8.6
chrI	2421738	2421739	-	18	F23C8.6
chrI	2421774	2421775	-	2	F23C8.6
chrI	2433614	2433615	-	2	F23C8.9
chrI	2434003	2434004	+	11	F23C8.4
chrI	2434004	2434005	+	4	F23C8.4
chrI	2434005	2434006	+	5	F23C8.4
chrI	2434006	2434007	+	3	F23C8.4
chrI	2434012	2434013	+	8	F23C8.4
chrI	2434018	2434019	+	3	F23C8.4
chrI	2471931	2471932	-	2	Y74C10AL.2
chrI	2471936	2471937	-	10	Y74C10AL.2
chrI	2483200	2483201	+	7	Y74C10AR.3
chrI	2483201	2483202	+	2	Y74C10AR.3
chrI	2489439	2489440	+	2	Y74C10AR.1
chrI	2489989	2489990	+	2	Y23H5B.6
chrI	2576018	2576019	-	5	C55C2.5
chrI	2584374	2584375	-	2	K07A3.1
chrI	2586104	2586105	-	2	K07A3.1
chrI	2586122	2586123	-	20	K07A3.1
chrI	2586124	2586125	-	5	K07A3.1
chrI	2620653	2620654	+	3	Y23H5A.3
chrI	2620654	2620655	+	2	Y23H5A.3
chrI	2620656	2620657	+	7	Y23H5A.3
chrI	2620664	2620665	+	2	Y23H5A.3
chrI	2620671	2620672	+	3	Y23H5A.3
chrI	2622317	2622318	+	4	Y23H5A.2
chrI	2628255	2628256	-	2	Y23H5A.7
chrI	2628256	2628257	-	4	Y23H5A.7
chrI	2648047	2648048	-	2	F40E3.5
chrI	2648057	2648058	-	2	F40E3.5
chrI	2668159	2668160	+	4	F32B5.6
chrI	2668164	2668165	+	7	F32B5.6
chrI	2668165	2668166	+	2	F32B5.6
chrI	2668168	2668169	+	2	F32B5.6
chrI	2689209	2689210	-	2	F32B5.8
chrI	2689385	2689386	-	2	F32B5.8
chrI	2689392	2689393	-	2	F32B5.8
chrI	2692086	2692087	+	2	F32B5.4
chrI	2692093	2692094	+	18	F32B5.4
chrI	2692095	2692096	+	2	F32B5.4
chrI	2700432	2700433	+	19	F32B5.1
chrI	2700457	2700458	+	2	F32B5.1
chrI	2700465	2700466	+	3	F32B5.1
chrI	2700494	2700495	+	4	F32B5.1
chrI	2700495	2700496	+	2	F32B5.1
chrI	2700496	2700497	+	2	F32B5.1
chrI	2700502	2700503	+	3	F32B5.1
chrI	2700503	2700504	+	2	F32B5.1
chrI	2700504	2700505	+	3	F32B5.1
chrI	2700879	2700880	+	5	F32B5.1
chrI	2700880	2700881	+	6	F32B5.1
chrI	2700882	2700883	+	2	F32B5.1
chrI	2700884	2700885	+	2	F32B5.1
chrI	2700887	2700888	+	2	F32B5.1
chrI	2700889	2700890	+	2	F32B5.1
chrI	2720986	2720987	-	2	Y71F9B.16
chrI	2720988	2720989	-	2	Y71F9B.16
chrI	2720989	2720990	-	3	Y71F9B.16
chrI	2727013	2727014	+	4	Y71F9B.4
chrI	2727014	2727015	+	32	Y71F9B.4
chrI	2727015	2727016	+	5	Y71F9B.4
chrI	2727019	2727020	+	3	Y71F9B.4
chrI	2727020	2727021	+	2	Y71F9B.4
chrI	2727021	2727022	+	4	Y71F9B.4
chrI	2727032	2727033	+	2	Y71F9B.4
chrI	2727033	2727034	+	5	Y71F9B.4
chrI	2727054	2727055	+	3	Y71F9B.4
chrI	2730010	2730011	+	2	Y71F9B.3
chrI	2730011	2730012	+	5	Y71F9B.3
chrI	2730918	2730919	+	4	Y71F9B.3
chrI	2731561	2731562	+	3	Y71F9B.2
chrI	2731562	2731563	+	2	Y71F9B.2
chrI	2738264	2738265	-	2	Y71F9B.8
chrI	2774909	2774910	+	3	Y71F9B.1
chrI	2774911	2774912	+	2	Y71F9B.1
chrI	2776090	2776091	-	2	Y71F9B.1
chrI	2778712	2778713	-	2	Y71F9B.13
chrI	2778718	2778719	-	10	Y71F9B.13
chrI	2785817	2785818	-	2	W03D8.9
chrI	2785851	2785852	-	2	W03D8.9
chrI	2785854	2785855	-	2	W03D8.9
chrI	2786053	2786054	-	3	W03D8.9
chrI	2786054	2786055	-	2	W03D8.9
chrI	2823386	2823387	-	2	W10C8.2
chrI	2855237	2855238	-	2	W10C8.5
chrI	2855247	2855248	-	2	W10C8.5
chrI	2855251	2855252	-	2	W10C8.5
chrI	2858752	2858753	-	2	W10C8.6
chrI	2858775	2858776	-	2	W10C8.6
chrI	2858781	2858782	-	2	W10C8.6
chrI	2859848	2859849	-	7	W10C8.6
chrI	2859849	2859850	-	4	W10C8.6
chrI	2875880	2875881	-	2	Y71F9AL.13
chrI	2875900	2875901	-	2	Y71F9AL.13
chrI	2875905	2875906	-	2	Y71F9AL.13
chrI	2875910	2875911	-	3	Y71F9AL.13
chrI	2875912	2875913	-	4	Y71F9AL.13
chrI	2875925	2875926	-	4	Y71F9AL.13
chrI	2875930	2875931	-	2	Y71F9AL.13
chrI	2875935	2875936	-	2	Y71F9AL.13
chrI	2875937	2875938	-	6	Y71F9AL.13
chrI	2875939	2875940	-	5	Y71F9AL.13
chrI	2875943	2875944	-	4	Y71F9AL.13
chrI	2875945	2875946	-	2	Y71F9AL.13
chrI	2875949	2875950	-	5	Y71F9AL.13
chrI	2875951	2875952	-	4	Y71F9AL.13
chrI	2875952	2875953	-	3	Y71F9AL.13
chrI	2875954	2875955	-	5	Y71F9AL.13
chrI	2875955	2875956	-	2	Y71F9AL.13
chrI	2875956	2875957	-	8	Y71F9AL.13
chrI	2875957	2875958	-	14	Y71F9AL.13
chrI	2875958	2875959	-	2	Y71F9AL.13
chrI	2875959	2875960	-	2	Y71F9AL.13
chrI	2875961	2875962	-	3	Y71F9AL.13
chrI	2875963	2875964	-	3	Y71F9AL.13
chrI	2875965	2875966	-	4	Y71F9AL.13
chrI	2875968	2875969	-	6	Y71F9AL.13
chrI	2875971	2875972	-	3	Y71F9AL.13
chrI	2875972	2875973	-	43	Y71F9AL.13
chrI	2875973	2875974	-	31	Y71F9AL.13
chrI	2875974	2875975	-	2	Y71F9AL.13
chrI	2876203	2876204	-	3	Y71F9AL.13
chrI	2876204	2876205	-	6	Y71F9AL.13
chrI	2876207	2876208	-	2	Y71F9AL.13
chrI	2876212	2876213	-	2	Y71F9AL.13
chrI	2876215	2876216	-	2	Y71F9AL.13
chrI	2876216	2876217	-	16	Y71F9AL.13
chrI	2876218	2876219	-	8	Y71F9AL.13
chrI	2876220	2876221	-	3	Y71F9AL.13
chrI	2876221	2876222	-	5	Y71F9AL.13
chrI	2876227	2876228	-	7	Y71F9AL.13
chrI	2876228	2876229	-	2	Y71F9AL.13
chrI	2876235	2876236	-	2	Y71F9AL.13
chrI	2876236	2876237	-	9	Y71F9AL.13
chrI	2876237	2876238	-	7	Y71F9AL.13
chrI	2876238	2876239	-	6	Y71F9AL.13
chrI	2876248	2876249	-	6	Y71F9AL.13
chrI	2876252	2876253	-	2	Y71F9AL.13
chrI	2876255	2876256	-	6	Y71F9AL.13
chrI	2876256	2876257	-	4	Y71F9AL.13
chrI	2876258	2876259	-	5	Y71F9AL.13
chrI	2876259	2876260	-	6	Y71F9AL.13
chrI	2876260	2876261	-	12	Y71F9AL.13
chrI	2876261	2876262	-	3	Y71F9AL.13
chrI	2876262	2876263	-	13	Y71F9AL.13
chrI	2876266	2876267	-	11	Y71F9AL.13
chrI	2876270	2876271	-	20	Y71F9AL.13
chrI	2876271	2876272	-	6	Y71F9AL.13
chrI	2876272	2876273	-	13	Y71F9AL.13
chrI	2876274	2876275	-	15	Y71F9AL.13
chrI	2876275	2876276	-	7	Y71F9AL.13
chrI	2876276	2876277	-	20	Y71F9AL.13
chrI	2876277	2876278	-	5	Y71F9AL.13
chrI	2876278	2876279	-	23	Y71F9AL.13
chrI	2876283	2876284	-	15	Y71F9AL.13
chrI	2876284	2876285	-	12	Y71F9AL.13
chrI	2876287	2876288	-	12	Y71F9AL.13
chrI	2876288	2876289	-	17	Y71F9AL.13
chrI	2876289	2876290	-	2	Y71F9AL.13
chrI	2876290	2876291	-	13	Y71F9AL.13
chrI	2876291	2876292	-	16	Y71F9AL.13
chrI	2876292	2876293	-	12	Y71F9AL.13
chrI	2876293	2876294	-	19	Y71F9AL.13
chrI	2876294	2876295	-	39	Y71F9AL.13
chrI	2876295	2876296	-	33	Y71F9AL.13
chrI	2876296	2876297	-	86	Y71F9AL.13
chrI	2876297	2876298	-	28	Y71F9AL.13
chrI	2876298	2876299	-	15	Y71F9AL.13
chrI	2876299	2876300	-	100	Y71F9AL.13
chrI	2876300	2876301	-	9	Y71F9AL.13
chrI	2876301	2876302	-	4	Y71F9AL.13
chrI	2876302	2876303	-	30	Y71F9AL.13
chrI	2876303	2876304	-	338	Y71F9AL.13
chrI	2876304	2876305	-	375	Y71F9AL.13
chrI	2876305	2876306	-	218	Y71F9AL.13
chrI	2876306	2876307	-	138	Y71F9AL.13
chrI	2876307	2876308	-	2280	Y71F9AL.13
chrI	2876308	2876309	-	3158	Y71F9AL.13
chrI	2876309	2876310	-	1174	Y71F9AL.13
chrI	2876310	2876311	-	9	Y71F9AL.13
chrI	2876311	2876312	-	34	Y71F9AL.13
chrI	2876312	2876313	-	55	Y71F9AL.13
chrI	2876313	2876314	-	936	Y71F9AL.13
chrI	2876314	2876315	-	14	Y71F9AL.13
chrI	2876315	2876316	-	3	Y71F9AL.13
chrI	2876317	2876318	-	4	Y71F9AL.13
chrI	2876931	2876932	+	4	Y71F9AL.9
chrI	2876932	2876933	+	24	Y71F9AL.9
chrI	2876933	2876934	+	18	Y71F9AL.9
chrI	2876937	2876938	+	4	Y71F9AL.9
chrI	2876941	2876942	+	6	Y71F9AL.9
chrI	2876943	2876944	+	3	Y71F9AL.9
chrI	2876948	2876949	+	4	Y71F9AL.9
chrI	2876950	2876951	+	4	Y71F9AL.9
chrI	2877134	2877135	+	5	Y71F9AL.9
chrI	2877402	2877403	+	2	Y71F9AL.9
chrI	2878685	2878686	+	3	Y71F9AL.8
chrI	2883441	2883442	-	11	Y71F9AL.14
chrI	2897656	2897657	-	2	Y71F9AL.17
chrI	2901324	2901325	+	2	Y71F9AL.5
chrI	2915210	2915211	+	2	Y71F9AL.18
chrI	2915210	2915211	+	2	Y71F9AL.2
chrI	2915211	2915212	+	3	Y71F9AL.18
chrI	2915211	2915212	+	3	Y71F9AL.2
chrI	2928394	2928395	+	4	Y71F9AM.6
chrI	2928395	2928396	+	7	Y71F9AM.6
chrI	2928396	2928397	+	9	Y71F9AM.6
chrI	2928421	2928422	+	4	Y71F9AM.6
chrI	2928507	2928508	+	149	Y71F9AM.6
chrI	2928508	2928509	+	5	Y71F9AM.6
chrI	2928509	2928510	+	27	Y71F9AM.6
chrI	2928511	2928512	+	7	Y71F9AM.6
chrI	2928512	2928513	+	16	Y71F9AM.6
chrI	2928513	2928514	+	5	Y71F9AM.6
chrI	2928514	2928515	+	4	Y71F9AM.6
chrI	2928518	2928519	+	3	Y71F9AM.6
chrI	2928520	2928521	+	6	Y71F9AM.6
chrI	2928521	2928522	+	8	Y71F9AM.6
chrI	2928522	2928523	+	2	Y71F9AM.6
chrI	2928528	2928529	+	2	Y71F9AM.6
chrI	2928704	2928705	+	3	Y71F9AM.6
chrI	2928711	2928712	+	2	Y71F9AM.6
chrI	2928901	2928902	+	3	Y71F9AM.6
chrI	2928943	2928944	+	2	Y71F9AM.6
chrI	2929829	2929830	+	3	Y71F9AM.5
chrI	2929943	2929944	+	7	Y71F9AM.5
chrI	2929944	2929945	+	2	Y71F9AM.5
chrI	2929949	2929950	+	3	Y71F9AM.5
chrI	2929950	2929951	+	2	Y71F9AM.5
chrI	3002819	3002820	-	3	Y54E10BL.5
chrI	3002821	3002822	-	2	Y54E10BL.5
chrI	3002824	3002825	-	3	Y54E10BL.5
chrI	3002832	3002833	-	4	Y54E10BL.5
chrI	3002833	3002834	-	3	Y54E10BL.5
chrI	3002834	3002835	-	2	Y54E10BL.5
chrI	3002835	3002836	-	5	Y54E10BL.5
chrI	3002837	3002838	-	2	Y54E10BL.5
chrI	3002841	3002842	-	2	Y54E10BL.5
chrI	3002842	3002843	-	8	Y54E10BL.5
chrI	3004170	3004171	+	2	Y54E10BL.3
chrI	3010687	3010688	+	2	Y54E10BL.6
chrI	3010687	3010688	+	2	Y54E10BL.2
chrI	3010688	3010689	+	2	Y54E10BL.6
chrI	3010688	3010689	+	2	Y54E10BL.2
chrI	3015742	3015743	+	2	Y54E10BR.4
chrI	3017897	3017898	+	3	Y54E10BR.4
chrI	3017902	3017903	+	3	Y54E10BR.4
chrI	3021652	3021653	+	9	Y54E10BR.3
chrI	3021653	3021654	+	4	Y54E10BR.3
chrI	3023142	3023143	+	2	Y54E10BR.3
chrI	3030250	3030251	-	2	Y54E10BR.5
chrI	3030253	3030254	-	2	Y54E10BR.5
chrI	3031863	3031864	-	2	Y54E10BR.6
chrI	3069748	3069749	-	2	M01B12.3
chrI	3070143	3070144	-	2	M01B12.3
chrI	3116627	3116628	-	3	C45E1.4
chrI	3137204	3137205	+	2	K09H9.3
chrI	3137207	3137208	+	5	K09H9.3
chrI	3137212	3137213	+	2	K09H9.3
chrI	3140024	3140025	-	2	K09H9.8
chrI	3140547	3140548	-	2	K09H9.8
chrI	3140555	3140556	-	2	K09H9.8
chrI	3143145	3143146	-	2	K09H9.5
chrI	3143149	3143150	-	2	K09H9.5
chrI	3143172	3143173	-	3	K09H9.5
chrI	3148011	3148012	+	13	K09H9.2
chrI	3148015	3148016	+	2	K09H9.2
chrI	3151167	3151168	-	2	K09H9.7
chrI	3151994	3151995	-	2	K09H9.7
chrI	3151997	3151998	-	2	K09H9.7
chrI	3152001	3152002	-	3	K09H9.7
chrI	3162810	3162811	+	16	Y54E10A.7
chrI	3162811	3162812	+	5	Y54E10A.7
chrI	3162832	3162833	+	2	Y54E10A.7
chrI	3162833	3162834	+	3	Y54E10A.7
chrI	3168117	3168118	+	5	Y54E10A.5
chrI	3168118	3168119	+	2	Y54E10A.5
chrI	3168182	3168183	+	2	Y54E10A.5
chrI	3168190	3168191	+	8	Y54E10A.5
chrI	3168192	3168193	+	4	Y54E10A.5
chrI	3169092	3169093	+	2	Y54E10A.5
chrI	3176161	3176162	-	2	Y54E10A.10
chrI	3176316	3176317	-	3	Y54E10A.10
chrI	3192739	3192740	-	3	Y54E10A.11
chrI	3198721	3198722	-	2	Y54E10A.12
chrI	3211176	3211177	+	2	Y54E10A.4
chrI	3246022	3246023	-	2	Y54E10A.16
chrI	3246022	3246023	-	2	Y54E10A.2
chrI	3246066	3246067	-	3	Y54E10A.16
chrI	3246066	3246067	-	3	Y54E10A.2
chrI	3246072	3246073	-	2	Y54E10A.2
chrI	3246073	3246074	-	2	Y54E10A.2
chrI	3246074	3246075	-	15	Y54E10A.2
chrI	3265848	3265849	-	2	Y44E3B.1
chrI	3265855	3265856	-	2	Y44E3B.1
chrI	3265856	3265857	-	7	Y44E3B.1
chrI	3267093	3267094	+	12	W01B11.3
chrI	3267095	3267096	+	3	W01B11.3
chrI	3267097	3267098	+	10	W01B11.3
chrI	3267099	3267100	+	2	W01B11.3
chrI	3267125	3267126	+	2	W01B11.3
chrI	3267289	3267290	+	2	W01B11.3
chrI	3268528	3268529	+	2	W01B11.3
chrI	3294021	3294022	-	2	W01B11.6
chrI	3294030	3294031	-	4	W01B11.6
chrI	3294032	3294033	-	5	W01B11.6
chrI	3294033	3294034	-	6	W01B11.6
chrI	3294036	3294037	-	2	W01B11.6
chrI	3294327	3294328	-	3	W01B11.6
chrI	3294329	3294330	-	2	W01B11.6
chrI	3294337	3294338	-	3	W01B11.6
chrI	3294343	3294344	-	2	W01B11.6
chrI	3294345	3294346	-	9	W01B11.6
chrI	3294347	3294348	-	3	W01B11.6
chrI	3294348	3294349	-	3	W01B11.6
chrI	3294350	3294351	-	2	W01B11.6
chrI	3294354	3294355	-	8	W01B11.6
chrI	3318286	3318287	-	8	Y44E3A.3
chrI	3318563	3318564	-	2	Y44E3A.3
chrI	3318567	3318568	-	2	Y44E3A.3
chrI	3318568	3318569	-	2	Y44E3A.3
chrI	3318575	3318576	-	3	Y44E3A.3
chrI	3318576	3318577	-	4	Y44E3A.3
chrI	3318581	3318582	-	3	Y44E3A.3
chrI	3339127	3339128	+	2	Y44E3A.1
chrI	3339959	3339960	+	2	Y44E3A.1
chrI	3349754	3349755	-	2	Y44E3A.6
chrI	3349760	3349761	-	2	Y44E3A.6
chrI	3349763	3349764	-	4	Y44E3A.6
chrI	3349893	3349894	-	3	Y44E3A.6
chrI	3349899	3349900	-	2	Y44E3A.6
chrI	3349900	3349901	-	2	Y44E3A.6
chrI	3363174	3363175	+	9	W05F2.8
chrI	3363184	3363185	+	2	W05F2.8
chrI	3420363	3420364	+	5	K03E5.2
chrI	3472764	3472765	-	3	Y47G6A.36
chrI	3472764	3472765	-	3	Y47G6A.10
chrI	3474420	3474421	-	2	Y47G6A.10
chrI	3474420	3474421	-	2	Y47G6A.15
chrI	3474423	3474424	-	5	Y47G6A.10
chrI	3474423	3474424	-	5	Y47G6A.15
chrI	3476295	3476296	-	2	Y47G6A.10
chrI	3476295	3476296	-	2	Y47G6A.15
chrI	3476298	3476299	-	2	Y47G6A.10
chrI	3476298	3476299	-	2	Y47G6A.15
chrI	3476299	3476300	-	9	Y47G6A.10
chrI	3476299	3476300	-	9	Y47G6A.15
chrI	3481990	3481991	+	5	Y47G6A.8
chrI	3481995	3481996	+	2	Y47G6A.8
chrI	3482000	3482001	+	2	Y47G6A.8
chrI	3482001	3482002	+	2	Y47G6A.8
chrI	3482003	3482004	+	4	Y47G6A.8
chrI	3482007	3482008	+	6	Y47G6A.8
chrI	3516508	3516509	+	4	Y47G6A.6
chrI	3516515	3516516	+	3	Y47G6A.6
chrI	3546896	3546897	-	3	Y47G6A.20
chrI	3546899	3546900	-	6	Y47G6A.20
chrI	3559793	3559794	-	4	Y47G6A.21
chrI	3562753	3562754	-	3	Y47G6A.22
chrI	3562770	3562771	-	2	Y47G6A.22
chrI	3562772	3562773	-	18	Y47G6A.22
chrI	3562775	3562776	-	2	Y47G6A.22
chrI	3562841	3562842	-	2	Y47G6A.22
chrI	3562847	3562848	-	2	Y47G6A.22
chrI	3562849	3562850	-	2	Y47G6A.22
chrI	3605701	3605702	-	4	Y47G6A.24
chrI	3605702	3605703	-	2	Y47G6A.24
chrI	3605704	3605705	-	15	Y47G6A.24
chrI	3608511	3608512	+	11	Y47G6A.2
chrI	3608515	3608516	+	6	Y47G6A.2
chrI	3608615	3608616	+	8	Y47G6A.2
chrI	3611935	3611936	+	2	Y47G6A.1
chrI	3629476	3629477	+	2	T28F2.3
chrI	3637460	3637461	+	2	T28F2.2
chrI	3637675	3637676	+	3	T28F2.2
chrI	3652596	3652597	-	5	T28F2.6
chrI	3654017	3654018	+	2	T28F2.8
chrI	3680718	3680719	-	2	D1037.3
chrI	3680747	3680748	-	2	D1037.3
chrI	3680758	3680759	-	2	D1037.3
chrI	3680765	3680766	-	2	D1037.3
chrI	3680775	3680776	-	2	D1037.3
chrI	3680785	3680786	-	2	D1037.3
chrI	3680788	3680789	-	4	D1037.3
chrI	3680792	3680793	-	2	D1037.3
chrI	3680795	3680796	-	5	D1037.3
chrI	3680796	3680797	-	10	D1037.3
chrI	3680881	3680882	-	2	D1037.3
chrI	3680886	3680887	-	4	D1037.3
chrI	3680893	3680894	-	2	D1037.3
chrI	3680900	3680901	-	5	D1037.3
chrI	3680913	3680914	-	3	D1037.3
chrI	3680914	3680915	-	2	D1037.3
chrI	3680921	3680922	-	2	D1037.3
chrI	3680922	3680923	-	17	D1037.3
chrI	3680923	3680924	-	9	D1037.3
chrI	3680924	3680925	-	4	D1037.3
chrI	3680925	3680926	-	6	D1037.3
chrI	3680926	3680927	-	13	D1037.3
chrI	3680928	3680929	-	2	D1037.3
chrI	3683983	3683984	-	2	D1037.4
chrI	3683988	3683989	-	2	D1037.4
chrI	3684087	3684088	-	2	D1037.4
chrI	3684788	3684789	+	4	D1037.1
chrI	3684789	3684790	+	3	D1037.1
chrI	3697546	3697547	-	2	H26D21.2
chrI	3698102	3698103	+	3	H26D21.1
chrI	3698103	3698104	+	3	H26D21.1
chrI	3727019	3727020	+	3	T12F5.3
chrI	3727020	3727021	+	9	T12F5.3
chrI	3727024	3727025	+	6	T12F5.3
chrI	3727025	3727026	+	2	T12F5.3
chrI	3727026	3727027	+	8	T12F5.3
chrI	3727028	3727029	+	2	T12F5.3
chrI	3727029	3727030	+	5	T12F5.3
chrI	3727114	3727115	+	3	T12F5.3
chrI	3727115	3727116	+	4	T12F5.3
chrI	3727119	3727120	+	2	T12F5.3
chrI	3737477	3737478	-	2	T12F5.5
chrI	3753943	3753944	-	2	Y8G1A.2
chrI	3753945	3753946	-	3	Y8G1A.2
chrI	3753950	3753951	-	2	Y8G1A.2
chrI	3753954	3753955	-	6	Y8G1A.2
chrI	3753955	3753956	-	2	Y8G1A.2
chrI	3756732	3756733	-	2	ZK770.3
chrI	3758107	3758108	-	3	ZK770.3
chrI	3759004	3759005	-	2	ZK770.3
chrI	3759008	3759009	-	2	ZK770.3
chrI	3759009	3759010	-	2	ZK770.3
chrI	3759016	3759017	-	2	ZK770.3
chrI	3759024	3759025	-	2	ZK770.3
chrI	3759032	3759033	-	4	ZK770.3
chrI	3759033	3759034	-	6	ZK770.3
chrI	3759035	3759036	-	5	ZK770.3
chrI	3759037	3759038	-	16	ZK770.3
chrI	3759039	3759040	-	7	ZK770.3
chrI	3759040	3759041	-	6	ZK770.3
chrI	3759042	3759043	-	2	ZK770.3
chrI	3759044	3759045	-	8	ZK770.3
chrI	3782117	3782118	+	3	C32E8.5
chrI	3782144	3782145	+	2	C32E8.5
chrI	3782231	3782232	+	17	C32E8.5
chrI	3782233	3782234	+	3	C32E8.5
chrI	3782234	3782235	+	5	C32E8.5
chrI	3782235	3782236	+	5	C32E8.5
chrI	3782283	3782284	+	2	C32E8.5
chrI	3782394	3782395	+	4	C32E8.5
chrI	3782410	3782411	+	2	C32E8.5
chrI	3783901	3783902	+	2	C32E8.4
chrI	3783905	3783906	+	2	C32E8.4
chrI	3783907	3783908	+	8	C32E8.4
chrI	3783908	3783909	+	2	C32E8.4
chrI	3783918	3783919	+	2	C32E8.4
chrI	3786587	3786588	+	13	C32E8.3
chrI	3786588	3786589	+	12	C32E8.3
chrI	3786589	3786590	+	2	C32E8.3
chrI	3786597	3786598	+	2	C32E8.3
chrI	3786598	3786599	+	3	C32E8.3
chrI	3786604	3786605	+	3	C32E8.3
chrI	3786791	3786792	+	5	C32E8.3
chrI	3788035	3788036	+	246	C32E8.2
chrI	3788036	3788037	+	22	C32E8.2
chrI	3788037	3788038	+	41	C32E8.2
chrI	3788038	3788039	+	70	C32E8.2
chrI	3788039	3788040	+	126	C32E8.2
chrI	3788040	3788041	+	2	C32E8.2
chrI	3788041	3788042	+	64	C32E8.2
chrI	3788042	3788043	+	94	C32E8.2
chrI	3788043	3788044	+	333	C32E8.2
chrI	3788044	3788045	+	14	C32E8.2
chrI	3788045	3788046	+	53	C32E8.2
chrI	3788046	3788047	+	173	C32E8.2
chrI	3788047	3788048	+	82	C32E8.2
chrI	3788048	3788049	+	33	C32E8.2
chrI	3788049	3788050	+	3	C32E8.2
chrI	3788050	3788051	+	161	C32E8.2
chrI	3788051	3788052	+	5	C32E8.2
chrI	3788052	3788053	+	180	C32E8.2
chrI	3788053	3788054	+	18	C32E8.2
chrI	3788054	3788055	+	26	C32E8.2
chrI	3788055	3788056	+	73	C32E8.2
chrI	3788057	3788058	+	3	C32E8.2
chrI	3788059	3788060	+	6	C32E8.2
chrI	3788060	3788061	+	5	C32E8.2
chrI	3788062	3788063	+	6	C32E8.2
chrI	3788063	3788064	+	27	C32E8.2
chrI	3788064	3788065	+	15	C32E8.2
chrI	3788065	3788066	+	5	C32E8.2
chrI	3788066	3788067	+	51	C32E8.2
chrI	3788067	3788068	+	7	C32E8.2
chrI	3788068	3788069	+	35	C32E8.2
chrI	3788069	3788070	+	3	C32E8.2
chrI	3788070	3788071	+	8	C32E8.2
chrI	3788071	3788072	+	10	C32E8.2
chrI	3788072	3788073	+	4	C32E8.2
chrI	3788074	3788075	+	10	C32E8.2
chrI	3788075	3788076	+	12	C32E8.2
chrI	3788076	3788077	+	3	C32E8.2
chrI	3788080	3788081	+	11	C32E8.2
chrI	3788081	3788082	+	3	C32E8.2
chrI	3788082	3788083	+	18	C32E8.2
chrI	3788083	3788084	+	20	C32E8.2
chrI	3788085	3788086	+	15	C32E8.2
chrI	3788086	3788087	+	5	C32E8.2
chrI	3788087	3788088	+	5	C32E8.2
chrI	3788088	3788089	+	3	C32E8.2
chrI	3788089	3788090	+	9	C32E8.2
chrI	3788090	3788091	+	3	C32E8.2
chrI	3788091	3788092	+	3	C32E8.2
chrI	3788092	3788093	+	9	C32E8.2
chrI	3788094	3788095	+	10	C32E8.2
chrI	3788095	3788096	+	6	C32E8.2
chrI	3788096	3788097	+	5	C32E8.2
chrI	3788097	3788098	+	20	C32E8.2
chrI	3788098	3788099	+	4	C32E8.2
chrI	3788102	3788103	+	3	C32E8.2
chrI	3788104	3788105	+	2	C32E8.2
chrI	3788105	3788106	+	2	C32E8.2
chrI	3788106	3788107	+	6	C32E8.2
chrI	3788107	3788108	+	10	C32E8.2
chrI	3788108	3788109	+	5	C32E8.2
chrI	3788110	3788111	+	2	C32E8.2
chrI	3788111	3788112	+	2	C32E8.2
chrI	3788115	3788116	+	4	C32E8.2
chrI	3788116	3788117	+	4	C32E8.2
chrI	3788117	3788118	+	8	C32E8.2
chrI	3788118	3788119	+	5	C32E8.2
chrI	3788120	3788121	+	3	C32E8.2
chrI	3788121	3788122	+	2	C32E8.2
chrI	3788125	3788126	+	2	C32E8.2
chrI	3788130	3788131	+	2	C32E8.2
chrI	3788131	3788132	+	3	C32E8.2
chrI	3788133	3788134	+	4	C32E8.2
chrI	3788134	3788135	+	4	C32E8.2
chrI	3788138	3788139	+	2	C32E8.2
chrI	3788139	3788140	+	5	C32E8.2
chrI	3788143	3788144	+	3	C32E8.2
chrI	3788144	3788145	+	3	C32E8.2
chrI	3788244	3788245	+	2	C32E8.2
chrI	3788246	3788247	+	8	C32E8.2
chrI	3788247	3788248	+	13	C32E8.2
chrI	3788248	3788249	+	9	C32E8.2
chrI	3788249	3788250	+	9	C32E8.2
chrI	3788250	3788251	+	32	C32E8.2
chrI	3788251	3788252	+	3	C32E8.2
chrI	3788252	3788253	+	2	C32E8.2
chrI	3788254	3788255	+	4	C32E8.2
chrI	3788261	3788262	+	2	C32E8.2
chrI	3788262	3788263	+	3	C32E8.2
chrI	3788263	3788264	+	2	C32E8.2
chrI	3788264	3788265	+	2	C32E8.2
chrI	3788266	3788267	+	2	C32E8.2
chrI	3788272	3788273	+	5	C32E8.2
chrI	3788285	3788286	+	2	C32E8.2
chrI	3788290	3788291	+	2	C32E8.2
chrI	3788301	3788302	+	2	C32E8.2
chrI	3788316	3788317	+	2	C32E8.2
chrI	3788321	3788322	+	3	C32E8.2
chrI	3788322	3788323	+	2	C32E8.2
chrI	3788466	3788467	+	3	C32E8.2
chrI	3788513	3788514	+	2	C32E8.2
chrI	3788658	3788659	+	5	C32E8.2
chrI	3788664	3788665	+	3	C32E8.2
chrI	3797966	3797967	-	3	C32E8.9
chrI	3798991	3798992	-	2	C32E8.10
chrI	3803599	3803600	+	2	C32E8.10
chrI	3818071	3818072	+	4	F53F10.5
chrI	3818073	3818074	+	2	F53F10.5
chrI	3824944	3824945	+	21	F53F10.4
chrI	3824945	3824946	+	21	F53F10.4
chrI	3824947	3824948	+	4	F53F10.4
chrI	3824948	3824949	+	4	F53F10.4
chrI	3824952	3824953	+	6	F53F10.4
chrI	3824957	3824958	+	4	F53F10.4
chrI	3824980	3824981	+	2	F53F10.4
chrI	3825120	3825121	+	10	F53F10.4
chrI	3825121	3825122	+	2	F53F10.4
chrI	3827219	3827220	+	5	F53F10.3
chrI	3827223	3827224	+	2	F53F10.3
chrI	3827225	3827226	+	3	F53F10.3
chrI	3827230	3827231	+	2	F53F10.3
chrI	3827237	3827238	+	2	F53F10.3
chrI	3827238	3827239	+	3	F53F10.3
chrI	3827247	3827248	+	3	F53F10.3
chrI	3827280	3827281	+	2	F53F10.3
chrI	3828238	3828239	+	6	F53F10.8
chrI	3831114	3831115	+	49	F53F10.2
chrI	3831115	3831116	+	7	F53F10.2
chrI	3831119	3831120	+	5	F53F10.2
chrI	3831124	3831125	+	3	F53F10.2
chrI	3831152	3831153	+	3	F53F10.2
chrI	3833306	3833307	+	2	F53F10.2
chrI	3837762	3837763	-	2	F53F10.1
chrI	3837764	3837765	-	3	F53F10.1
chrI	3837766	3837767	-	2	F53F10.1
chrI	3837768	3837769	-	2	F53F10.1
chrI	3853843	3853844	+	4	T03F1.11
chrI	3853844	3853845	+	24	T03F1.11
chrI	3853845	3853846	+	20	T03F1.11
chrI	3853846	3853847	+	27	T03F1.11
chrI	3853847	3853848	+	26	T03F1.11
chrI	3853848	3853849	+	3	T03F1.11
chrI	3853850	3853851	+	9	T03F1.11
chrI	3853921	3853922	+	135	T03F1.11
chrI	3853922	3853923	+	15	T03F1.11
chrI	3853923	3853924	+	3	T03F1.11
chrI	3853924	3853925	+	2	T03F1.11
chrI	3853926	3853927	+	2	T03F1.11
chrI	3853927	3853928	+	69	T03F1.11
chrI	3853929	3853930	+	7	T03F1.11
chrI	3853930	3853931	+	2	T03F1.11
chrI	3853935	3853936	+	2	T03F1.11
chrI	3853936	3853937	+	6	T03F1.11
chrI	3853937	3853938	+	15	T03F1.11
chrI	3853947	3853948	+	4	T03F1.11
chrI	3853949	3853950	+	8	T03F1.11
chrI	3853950	3853951	+	6	T03F1.11
chrI	3853955	3853956	+	2	T03F1.11
chrI	3853956	3853957	+	2	T03F1.11
chrI	3860090	3860091	-	2	T03F1.8
chrI	3860582	3860583	-	2	T03F1.8
chrI	3865786	3865787	-	2	T03F1.9
chrI	3865787	3865788	-	8	T03F1.9
chrI	3867548	3867549	+	5	T03F1.3
chrI	3867549	3867550	+	2	T03F1.3
chrI	3867745	3867746	+	2	T03F1.3
chrI	3869218	3869219	+	4	T03F1.2
chrI	3874362	3874363	+	2	T03F1.1
chrI	3874363	3874364	+	2	T03F1.1
chrI	3874366	3874367	+	2	T03F1.1
chrI	3877070	3877071	+	2	C50F2.3
chrI	3897388	3897389	-	3	C50F2.5
chrI	3897396	3897397	-	2	C50F2.5
chrI	3897397	3897398	-	4	C50F2.5
chrI	3897398	3897399	-	3	C50F2.5
chrI	3899344	3899345	-	3	C50F2.6
chrI	3899345	3899346	-	8	C50F2.6
chrI	3899346	3899347	-	2	C50F2.6
chrI	3901342	3901343	-	2	C50F2.7
chrI	3908748	3908749	+	2	T20F5.2
chrI	3909252	3909253	+	2	T20F5.2
chrI	3924645	3924646	-	2	T20F5.6
chrI	3924649	3924650	-	3	T20F5.6
chrI	3927878	3927879	-	2	T20F5.7
chrI	3927882	3927883	-	2	T20F5.7
chrI	3927885	3927886	-	2	T20F5.7
chrI	3975742	3975743	-	2	F28H1.4
chrI	3983180	3983181	+	3	F28H1.3
chrI	3983181	3983182	+	3	F28H1.3
chrI	3983182	3983183	+	2	F28H1.3
chrI	3983193	3983194	+	5	F28H1.3
chrI	3983196	3983197	+	2	F28H1.3
chrI	3987949	3987950	+	7	F28H1.2
chrI	3987951	3987952	+	26	F28H1.2
chrI	3987952	3987953	+	84	F28H1.2
chrI	3987953	3987954	+	13	F28H1.2
chrI	3987954	3987955	+	9	F28H1.2
chrI	3987955	3987956	+	8	F28H1.2
chrI	3987956	3987957	+	3	F28H1.2
chrI	3987957	3987958	+	2	F28H1.2
chrI	3987958	3987959	+	15	F28H1.2
chrI	3987962	3987963	+	5	F28H1.2
chrI	3987963	3987964	+	9	F28H1.2
chrI	3987969	3987970	+	5	F28H1.2
chrI	3987971	3987972	+	5	F28H1.2
chrI	3987978	3987979	+	3	F28H1.2
chrI	3987980	3987981	+	2	F28H1.2
chrI	3987990	3987991	+	2	F28H1.2
chrI	3987995	3987996	+	2	F28H1.2
chrI	3987998	3987999	+	2	F28H1.2
chrI	3987999	3988000	+	2	F28H1.2
chrI	3988072	3988073	+	5	F28H1.2
chrI	3988073	3988074	+	40	F28H1.2
chrI	3988076	3988077	+	2	F28H1.2
chrI	3988077	3988078	+	2	F28H1.2
chrI	3988081	3988082	+	2	F28H1.2
chrI	3988082	3988083	+	12	F28H1.2
chrI	3988083	3988084	+	10	F28H1.2
chrI	3988085	3988086	+	3	F28H1.2
chrI	3988087	3988088	+	3	F28H1.2
chrI	3988094	3988095	+	3	F28H1.2
chrI	3988095	3988096	+	2	F28H1.2
chrI	3988100	3988101	+	2	F28H1.2
chrI	3988111	3988112	+	3	F28H1.2
chrI	3988112	3988113	+	2	F28H1.2
chrI	3988115	3988116	+	2	F28H1.2
chrI	3988128	3988129	+	2	F28H1.2
chrI	3988254	3988255	+	6	F28H1.2
chrI	3988261	3988262	+	12	F28H1.2
chrI	3988265	3988266	+	2	F28H1.2
chrI	3988267	3988268	+	3	F28H1.2
chrI	3988270	3988271	+	5	F28H1.2
chrI	3988282	3988283	+	3	F28H1.2
chrI	3988286	3988287	+	2	F28H1.2
chrI	4017475	4017476	-	5	F55C7.7
chrI	4114853	4114854	+	2	H31G24.4
chrI	4114858	4114859	+	4	H31G24.4
chrI	4115801	4115802	+	2	H31G24.4
chrI	4132236	4132237	-	2	E01A2.4
chrI	4137070	4137071	-	2	E01A2.5
chrI	4138569	4138570	-	2	E01A2.6
chrI	4140646	4140647	+	4	E01A2.1
chrI	4143825	4143826	-	3	E01A2.7
chrI	4146921	4146922	-	5	E01A2.10
chrI	4146923	4146924	-	10	E01A2.10
chrI	4147112	4147113	-	7	E01A2.10
chrI	4147120	4147121	-	2	E01A2.10
chrI	4147121	4147122	-	6	E01A2.10
chrI	4149370	4149371	-	2	R12E2.15
chrI	4149398	4149399	-	2	R12E2.15
chrI	4149408	4149409	-	6	R12E2.15
chrI	4149411	4149412	-	2	R12E2.15
chrI	4149412	4149413	-	4	R12E2.15
chrI	4149420	4149421	-	2	R12E2.15
chrI	4149993	4149994	+	3	R12E2.14
chrI	4149997	4149998	+	2	R12E2.14
chrI	4149998	4149999	+	4	R12E2.14
chrI	4150012	4150013	+	2	R12E2.14
chrI	4154394	4154395	-	2	R12E2.7
chrI	4154420	4154421	-	2	R12E2.7
chrI	4154423	4154424	-	12	R12E2.7
chrI	4154425	4154426	-	2	R12E2.7
chrI	4154426	4154427	-	3	R12E2.7
chrI	4154427	4154428	-	8	R12E2.7
chrI	4160712	4160713	-	4	R12E2.9
chrI	4160716	4160717	-	2	R12E2.9
chrI	4161084	4161085	-	2	R12E2.9
chrI	4161107	4161108	-	2	R12E2.9
chrI	4161111	4161112	-	3	R12E2.9
chrI	4161112	4161113	-	11	R12E2.9
chrI	4161113	4161114	-	15	R12E2.9
chrI	4161114	4161115	-	48	R12E2.9
chrI	4161118	4161119	-	2	R12E2.9
chrI	4161119	4161120	-	8	R12E2.9
chrI	4162044	4162045	+	3	R12E2.5
chrI	4162401	4162402	+	2	R12E2.5
chrI	4165319	4165320	+	2	R12E2.4
chrI	4173624	4173625	-	7	R12E2.11
chrI	4173625	4173626	-	6	R12E2.11
chrI	4175324	4175325	+	6	R12E2.3
chrI	4175327	4175328	+	3	R12E2.3
chrI	4175328	4175329	+	4	R12E2.3
chrI	4175333	4175334	+	3	R12E2.3
chrI	4175339	4175340	+	2	R12E2.3
chrI	4175683	4175684	+	2	R12E2.3
chrI	4178135	4178136	-	2	R12E2.13
chrI	4178444	4178445	-	6	R12E2.13
chrI	4178445	4178446	-	2	R12E2.13
chrI	4178820	4178821	+	2	R12E2.2
chrI	4186764	4186765	+	3	C18E3.7
chrI	4187840	4187841	+	2	C18E3.7
chrI	4190155	4190156	+	3	C18E3.6
chrI	4211114	4211115	+	2	C18E3.2
chrI	4215562	4215563	-	2	C18E3.9
chrI	4215747	4215748	-	2	C18E3.9
chrI	4229577	4229578	+	2	C43E11.6
chrI	4233890	4233891	+	2	C43E11.6
chrI	4236984	4236985	+	3	C43E11.5
chrI	4236985	4236986	+	4	C43E11.5
chrI	4236986	4236987	+	2	C43E11.5
chrI	4236994	4236995	+	3	C43E11.5
chrI	4242723	4242724	-	3	C43E11.7
chrI	4247521	4247522	-	2	C43E11.8
chrI	4247753	4247754	+	45	C43E11.4
chrI	4247754	4247755	+	4	C43E11.4
chrI	4247755	4247756	+	9	C43E11.4
chrI	4247757	4247758	+	7	C43E11.4
chrI	4247758	4247759	+	7	C43E11.4
chrI	4247802	4247803	+	2	C43E11.4
chrI	4249482	4249483	+	4	C43E11.11
chrI	4249490	4249491	+	4	C43E11.11
chrI	4249493	4249494	+	3	C43E11.11
chrI	4249494	4249495	+	2	C43E11.11
chrI	4250041	4250042	+	3	C43E11.11
chrI	4253269	4253270	+	2	C43E11.12
chrI	4253272	4253273	+	3	C43E11.12
chrI	4253279	4253280	+	3	C43E11.12
chrI	4265222	4265223	+	2	C43E11.2
chrI	4270696	4270697	+	4	C43E11.1
chrI	4270699	4270700	+	3	C43E11.1
chrI	4271541	4271542	+	2	C43E11.1
chrI	4304139	4304140	+	2	Y47D9A.1
chrI	4368102	4368103	+	2	ZK973.3
chrI	4371415	4371416	-	4	ZK973.9
chrI	4372765	4372766	-	2	ZK973.10
chrI	4373656	4373657	+	3	ZK973.2
chrI	4373660	4373661	+	2	ZK973.2
chrI	4381708	4381709	-	2	ZK973.11
chrI	4381791	4381792	-	2	ZK973.11
chrI	4381794	4381795	-	3	ZK973.11
chrI	4382588	4382589	+	2	ZK973.1
chrI	4384811	4384812	+	2	ZK973.1
chrI	4431925	4431926	-	3	C41D11.3
chrI	4444718	4444719	+	23	C41D11.2
chrI	4444719	4444720	+	3	C41D11.2
chrI	4444722	4444723	+	2	C41D11.2
chrI	4444740	4444741	+	2	C41D11.2
chrI	4444889	4444890	+	2	C41D11.2
chrI	4447581	4447582	-	2	C41D11.8
chrI	4448288	4448289	-	3	C41D11.8
chrI	4448446	4448447	-	3	C41D11.8
chrI	4448447	4448448	-	2	C41D11.8
chrI	4448448	4448449	-	4	C41D11.8
chrI	4448451	4448452	-	2	C41D11.8
chrI	4448452	4448453	-	8	C41D11.8
chrI	4448453	4448454	-	7	C41D11.8
chrI	4448454	4448455	-	5	C41D11.8
chrI	4448456	4448457	-	3	C41D11.8
chrI	4448457	4448458	-	4	C41D11.8
chrI	4448458	4448459	-	2	C41D11.8
chrI	4448459	4448460	-	3	C41D11.8
chrI	4450915	4450916	-	2	C41D11.5
chrI	4450924	4450925	-	2	C41D11.5
chrI	4456322	4456323	-	2	C41D11.7
chrI	4456334	4456335	-	2	C41D11.7
chrI	4456336	4456337	-	4	C41D11.7
chrI	4456340	4456341	-	4	C41D11.7
chrI	4457382	4457383	+	3	C41D11.1
chrI	4457384	4457385	+	2	C41D11.1
chrI	4511118	4511119	-	2	Y119C1B.4
chrI	4516079	4516080	-	2	Y119C1B.5
chrI	4516083	4516084	-	2	Y119C1B.5
chrI	4518489	4518490	-	9	Y119C1B.6
chrI	4539565	4539566	-	3	Y119C1B.9
chrI	4539719	4539720	-	2	Y119C1B.9
chrI	4539720	4539721	-	7	Y119C1B.9
chrI	4557653	4557654	+	3	D1007.15
chrI	4564094	4564095	+	2	D1007.14
chrI	4564097	4564098	+	4	D1007.14
chrI	4564114	4564115	+	3	D1007.14
chrI	4564289	4564290	+	2	D1007.14
chrI	4567162	4567163	+	2	D1007.13
chrI	4579065	4579066	-	2	D1007.18
chrI	4579072	4579073	-	3	D1007.18
chrI	4583801	4583802	-	5	D1007.5
chrI	4584265	4584266	-	2	D1007.6
chrI	4584268	4584269	-	2	D1007.6
chrI	4584270	4584271	-	3	D1007.6
chrI	4584271	4584272	-	2	D1007.6
chrI	4584272	4584273	-	2	D1007.6
chrI	4584273	4584274	-	2	D1007.6
chrI	4584274	4584275	-	3	D1007.6
chrI	4584275	4584276	-	3	D1007.6
chrI	4584277	4584278	-	3	D1007.6
chrI	4584278	4584279	-	3	D1007.6
chrI	4584280	4584281	-	3	D1007.6
chrI	4584283	4584284	-	5	D1007.6
chrI	4584284	4584285	-	2	D1007.6
chrI	4584290	4584291	-	6	D1007.6
chrI	4584291	4584292	-	3	D1007.6
chrI	4584292	4584293	-	24	D1007.6
chrI	4584296	4584297	-	25	D1007.6
chrI	4584375	4584376	-	2	D1007.6
chrI	4584406	4584407	-	3	D1007.6
chrI	4584423	4584424	-	4	D1007.6
chrI	4584425	4584426	-	3	D1007.6
chrI	4584426	4584427	-	2	D1007.6
chrI	4584427	4584428	-	4	D1007.6
chrI	4584435	4584436	-	10	D1007.6
chrI	4584437	4584438	-	5	D1007.6
chrI	4584442	4584443	-	2	D1007.6
chrI	4584443	4584444	-	11	D1007.6
chrI	4584444	4584445	-	8	D1007.6
chrI	4584445	4584446	-	5	D1007.6
chrI	4584446	4584447	-	16	D1007.6
chrI	4584449	4584450	-	5	D1007.6
chrI	4584450	4584451	-	3	D1007.6
chrI	4584451	4584452	-	2	D1007.6
chrI	4584452	4584453	-	3	D1007.6
chrI	4584453	4584454	-	30	D1007.6
chrI	4584454	4584455	-	51	D1007.6
chrI	4584455	4584456	-	2	D1007.6
chrI	4584456	4584457	-	16	D1007.6
chrI	4584457	4584458	-	39	D1007.6
chrI	4584458	4584459	-	7	D1007.6
chrI	4584459	4584460	-	9	D1007.6
chrI	4584460	4584461	-	2	D1007.6
chrI	4584461	4584462	-	7	D1007.6
chrI	4584462	4584463	-	24	D1007.6
chrI	4584464	4584465	-	3	D1007.6
chrI	4584465	4584466	-	4	D1007.6
chrI	4584467	4584468	-	14	D1007.6
chrI	4584468	4584469	-	2	D1007.6
chrI	4584469	4584470	-	6	D1007.6
chrI	4584470	4584471	-	66	D1007.6
chrI	4584471	4584472	-	3	D1007.6
chrI	4584472	4584473	-	33	D1007.6
chrI	4584473	4584474	-	2	D1007.6
chrI	4584474	4584475	-	3	D1007.6
chrI	4584475	4584476	-	2	D1007.6
chrI	4584476	4584477	-	11	D1007.6
chrI	4584477	4584478	-	10	D1007.6
chrI	4584481	4584482	-	3	D1007.6
chrI	4584482	4584483	-	7	D1007.6
chrI	4584483	4584484	-	7	D1007.6
chrI	4584485	4584486	-	15	D1007.6
chrI	4584486	4584487	-	47	D1007.6
chrI	4584487	4584488	-	94	D1007.6
chrI	4584488	4584489	-	170	D1007.6
chrI	4584489	4584490	-	3	D1007.6
chrI	4584490	4584491	-	2	D1007.6
chrI	4584491	4584492	-	8	D1007.6
chrI	4584492	4584493	-	9	D1007.6
chrI	4584494	4584495	-	5	D1007.6
chrI	4584495	4584496	-	9	D1007.6
chrI	4584496	4584497	-	9	D1007.6
chrI	4584497	4584498	-	37	D1007.6
chrI	4584498	4584499	-	9	D1007.6
chrI	4584499	4584500	-	6	D1007.6
chrI	4584500	4584501	-	18	D1007.6
chrI	4584501	4584502	-	32	D1007.6
chrI	4584502	4584503	-	38	D1007.6
chrI	4584503	4584504	-	75	D1007.6
chrI	4585114	4585115	+	18	D1007.12
chrI	4585115	4585116	+	101	D1007.12
chrI	4585116	4585117	+	107	D1007.12
chrI	4585117	4585118	+	44	D1007.12
chrI	4585118	4585119	+	14	D1007.12
chrI	4585119	4585120	+	177	D1007.12
chrI	4585120	4585121	+	38	D1007.12
chrI	4585121	4585122	+	66	D1007.12
chrI	4585122	4585123	+	14	D1007.12
chrI	4585123	4585124	+	8	D1007.12
chrI	4585124	4585125	+	6	D1007.12
chrI	4585125	4585126	+	4	D1007.12
chrI	4585126	4585127	+	13	D1007.12
chrI	4585127	4585128	+	16	D1007.12
chrI	4585128	4585129	+	29	D1007.12
chrI	4585129	4585130	+	2	D1007.12
chrI	4585131	4585132	+	2	D1007.12
chrI	4585133	4585134	+	8	D1007.12
chrI	4585134	4585135	+	2	D1007.12
chrI	4585135	4585136	+	7	D1007.12
chrI	4585136	4585137	+	3	D1007.12
chrI	4585138	4585139	+	12	D1007.12
chrI	4585139	4585140	+	2	D1007.12
chrI	4585140	4585141	+	3	D1007.12
chrI	4585141	4585142	+	4	D1007.12
chrI	4585142	4585143	+	24	D1007.12
chrI	4585143	4585144	+	3	D1007.12
chrI	4585144	4585145	+	6	D1007.12
chrI	4585145	4585146	+	2	D1007.12
chrI	4585147	4585148	+	3	D1007.12
chrI	4585148	4585149	+	3	D1007.12
chrI	4585150	4585151	+	5	D1007.12
chrI	4585163	4585164	+	2	D1007.12
chrI	4585165	4585166	+	4	D1007.12
chrI	4585166	4585167	+	2	D1007.12
chrI	4585172	4585173	+	2	D1007.12
chrI	4585185	4585186	+	2	D1007.12
chrI	4585440	4585441	+	59	D1007.12
chrI	4585441	4585442	+	2	D1007.12
chrI	4585443	4585444	+	6	D1007.12
chrI	4585444	4585445	+	5	D1007.12
chrI	4585447	4585448	+	2	D1007.12
chrI	4585451	4585452	+	6	D1007.12
chrI	4585455	4585456	+	4	D1007.12
chrI	4585456	4585457	+	6	D1007.12
chrI	4585457	4585458	+	2	D1007.12
chrI	4585461	4585462	+	3	D1007.12
chrI	4585462	4585463	+	2	D1007.12
chrI	4585463	4585464	+	7	D1007.12
chrI	4585475	4585476	+	2	D1007.12
chrI	4585489	4585490	+	3	D1007.12
chrI	4585501	4585502	+	4	D1007.12
chrI	4585508	4585509	+	5	D1007.12
chrI	4585587	4585588	+	13	D1007.12
chrI	4585589	4585590	+	36	D1007.12
chrI	4585594	4585595	+	4	D1007.12
chrI	4585595	4585596	+	2	D1007.12
chrI	4585597	4585598	+	2	D1007.12
chrI	4585614	4585615	+	2	D1007.12
chrI	4585684	4585685	+	2	D1007.12
chrI	4603224	4603225	+	2	D1007.16
chrI	4604400	4604401	+	5	D1007.8
chrI	4634104	4634105	+	2	C44E4.4
chrI	4634107	4634108	+	5	C44E4.4
chrI	4634134	4634135	+	2	C44E4.4
chrI	4634289	4634290	+	2	C44E4.4
chrI	4635948	4635949	-	2	C44E4.6
chrI	4636028	4636029	-	3	C44E4.6
chrI	4636033	4636034	-	2	C44E4.6
chrI	4636038	4636039	-	6	C44E4.6
chrI	4636039	4636040	-	5	C44E4.6
chrI	4636040	4636041	-	4	C44E4.6
chrI	4636043	4636044	-	2	C44E4.6
chrI	4636055	4636056	-	2	C44E4.6
chrI	4636057	4636058	-	13	C44E4.6
chrI	4636058	4636059	-	6	C44E4.6
chrI	4636059	4636060	-	3	C44E4.6
chrI	4636060	4636061	-	7	C44E4.6
chrI	4636061	4636062	-	22	C44E4.6
chrI	4636062	4636063	-	72	C44E4.6
chrI	4636063	4636064	-	51	C44E4.6
chrI	4636068	4636069	-	5	C44E4.6
chrI	4636357	4636358	-	2	C44E4.6
chrI	4636369	4636370	-	3	C44E4.6
chrI	4636374	4636375	-	2	C44E4.6
chrI	4636376	4636377	-	4	C44E4.6
chrI	4636377	4636378	-	8	C44E4.6
chrI	4636378	4636379	-	4	C44E4.6
chrI	4636379	4636380	-	7	C44E4.6
chrI	4636380	4636381	-	8	C44E4.6
chrI	4636384	4636385	-	2	C44E4.6
chrI	4636385	4636386	-	4	C44E4.6
chrI	4640855	4640856	-	2	C44E4.3
chrI	4644052	4644053	-	2	Y119C1A.1
chrI	4644063	4644064	-	3	Y119C1A.1
chrI	4644067	4644068	-	5	Y119C1A.1
chrI	4646203	4646204	-	4	B0041.4
chrI	4646213	4646214	-	4	B0041.4
chrI	4646215	4646216	-	10	B0041.4
chrI	4646216	4646217	-	5	B0041.4
chrI	4646217	4646218	-	5	B0041.4
chrI	4646219	4646220	-	6	B0041.4
chrI	4646221	4646222	-	10	B0041.4
chrI	4646226	4646227	-	3	B0041.4
chrI	4646233	4646234	-	18	B0041.4
chrI	4646380	4646381	-	2	B0041.4
chrI	4646387	4646388	-	3	B0041.4
chrI	4646598	4646599	-	2	B0041.4
chrI	4646613	4646614	-	2	B0041.4
chrI	4646616	4646617	-	2	B0041.4
chrI	4646633	4646634	-	2	B0041.4
chrI	4646675	4646676	-	5	B0041.4
chrI	4646676	4646677	-	6	B0041.4
chrI	4646677	4646678	-	7	B0041.4
chrI	4646684	4646685	-	2	B0041.4
chrI	4646686	4646687	-	5	B0041.4
chrI	4646687	4646688	-	4	B0041.4
chrI	4646688	4646689	-	2	B0041.4
chrI	4646690	4646691	-	4	B0041.4
chrI	4646696	4646697	-	2	B0041.4
chrI	4646697	4646698	-	6	B0041.4
chrI	4646699	4646700	-	5	B0041.4
chrI	4646700	4646701	-	12	B0041.4
chrI	4646701	4646702	-	3	B0041.4
chrI	4646702	4646703	-	7	B0041.4
chrI	4646703	4646704	-	15	B0041.4
chrI	4646704	4646705	-	3	B0041.4
chrI	4646705	4646706	-	6	B0041.4
chrI	4646710	4646711	-	2	B0041.4
chrI	4646711	4646712	-	2	B0041.4
chrI	4646831	4646832	-	2	B0041.4
chrI	4646849	4646850	-	2	B0041.4
chrI	4646857	4646858	-	4	B0041.4
chrI	4646861	4646862	-	2	B0041.4
chrI	4646863	4646864	-	2	B0041.4
chrI	4646865	4646866	-	4	B0041.4
chrI	4646868	4646869	-	4	B0041.4
chrI	4646876	4646877	-	4	B0041.4
chrI	4646878	4646879	-	3	B0041.4
chrI	4646879	4646880	-	6	B0041.4
chrI	4646880	4646881	-	2	B0041.4
chrI	4646889	4646890	-	4	B0041.4
chrI	4646891	4646892	-	2	B0041.4
chrI	4646893	4646894	-	4	B0041.4
chrI	4646897	4646898	-	3	B0041.4
chrI	4646899	4646900	-	4	B0041.4
chrI	4646913	4646914	-	3	B0041.4
chrI	4646916	4646917	-	2	B0041.4
chrI	4646921	4646922	-	11	B0041.4
chrI	4646922	4646923	-	8	B0041.4
chrI	4646923	4646924	-	17	B0041.4
chrI	4646926	4646927	-	18	B0041.4
chrI	4646927	4646928	-	38	B0041.4
chrI	4646928	4646929	-	14	B0041.4
chrI	4646929	4646930	-	6	B0041.4
chrI	4646930	4646931	-	9	B0041.4
chrI	4646931	4646932	-	42	B0041.4
chrI	4646932	4646933	-	8	B0041.4
chrI	4646933	4646934	-	12	B0041.4
chrI	4646934	4646935	-	12	B0041.4
chrI	4646935	4646936	-	7	B0041.4
chrI	4646936	4646937	-	23	B0041.4
chrI	4646937	4646938	-	61	B0041.4
chrI	4646938	4646939	-	3	B0041.4
chrI	4646939	4646940	-	14	B0041.4
[truncated: 42,012 more rows]
