# Supplementary material for: Direct full-length RNA sequencing reveals unexpected transcriptome complexity during Caenorhabditis elegans development
Source: HighWire-hosted journal article supplement (doi:10.1101/gr.251512.119), 2020-02-01
Supplement: Supplemental_Table_S2.xlsx [file Supplemental_Table_S2.xlsx]

## Sheet: Table S2
Table S2 List of genomic position of splicing junctions identified with long reads.
Chr	Start	End	Strand	Gene
chrI	4357	4358	-	Y74C9A.3
chrI	4358	4359	-	Y74C9A.3
chrI	5194	5195	-	Y74C9A.3
chrI	5295	5296	-	Y74C9A.3
chrI	5296	5297	-	Y74C9A.3
chrI	6036	6037	-	Y74C9A.3
chrI	6326	6327	-	Y74C9A.3
chrI	6327	6328	-	Y74C9A.3
chrI	9726	9727	-	Y74C9A.3
chrI	9845	9846	-	Y74C9A.3
chrI	9846	9847	-	Y74C9A.3
chrI	10094	10095	-	Y74C9A.3
chrI	11556	11557	+	Y74C9A.2
chrI	11560	11561	+	Y74C9A.2
chrI	11561	11562	+	Y74C9A.2
chrI	11617	11618	+	Y74C9A.2
chrI	11622	11623	+	Y74C9A.2
chrI	11640	11641	+	Y74C9A.2
chrI	11685	11686	+	Y74C9A.2
chrI	11688	11689	+	Y74C9A.2
chrI	11689	11690	+	Y74C9A.2
chrI	14949	14950	+	Y74C9A.2
chrI	14950	14951	+	Y74C9A.2
chrI	15159	15160	+	Y74C9A.2
chrI	15160	15161	+	Y74C9A.2
chrI	16170	16171	+	Y74C9A.2
chrI	16251	16252	+	Y74C9A.2
chrI	16472	16473	+	Y74C9A.2
chrI	16496	16497	+	Y74C9A.2
chrI	17958	17959	-	Y74C9A.4
chrI	18005	18006	-	Y74C9A.4
chrI	18115	18116	-	Y74C9A.4
chrI	19014	19015	-	Y74C9A.4
chrI	19241	19242	-	Y74C9A.4
chrI	20270	20271	-	Y74C9A.4
chrI	20478	20479	-	Y74C9A.4
chrI	20847	20848	-	Y74C9A.4
chrI	20964	20965	-	Y74C9A.4
chrI	21012	21013	-	Y74C9A.4
chrI	21139	21140	-	Y74C9A.4
chrI	24650	24651	-	Y74C9A.4
chrI	24845	24846	-	Y74C9A.4
chrI	24928	24929	-	Y74C9A.4
chrI	25090	25091	-	Y74C9A.4
chrI	25272	25273	-	Y74C9A.4
chrI	25472	25473	-	Y74C9A.4
chrI	26366	26367	-	Y74C9A.4
chrI	26370	26371	-	Y74C9A.4
chrI	26524	26525	-	Y74C9A.4
chrI	26589	26590	-	Y74C9A.4
chrI	26690	26691	-	Y74C9A.4
chrI	26732	26733	-	Y74C9A.4
chrI	28405	28406	-	Y74C9A.5
chrI	29099	29100	-	Y74C9A.5
chrI	29367	29368	-	Y74C9A.5
chrI	29764	29765	-	Y74C9A.5
chrI	29768	29769	-	Y74C9A.5
chrI	30424	30425	-	Y74C9A.5
chrI	31768	31769	-	Y74C9A.5
chrI	32072	32073	-	Y74C9A.5
chrI	32411	32412	-	Y74C9A.5
chrI	47609	47610	+	Y48G1C.12
chrI	47610	47611	+	Y48G1C.12
chrI	47695	47696	+	Y48G1C.12
chrI	47857	47858	+	Y48G1C.12
chrI	47858	47859	+	Y48G1C.12
chrI	48347	48348	+	Y48G1C.12
chrI	48522	48523	+	Y48G1C.12
chrI	48529	48530	+	Y48G1C.12
chrI	48530	48531	+	Y48G1C.12
chrI	49231	49232	+	Y48G1C.12
chrI	49240	49241	+	Y48G1C.12
chrI	49250	49251	+	Y48G1C.12
chrI	50015	50016	+	Y48G1C.4
chrI	50016	50017	+	Y48G1C.4
chrI	50814	50815	+	Y48G1C.4
chrI	51029	51030	+	Y48G1C.4
chrI	51030	51031	+	Y48G1C.4
chrI	52282	52283	+	Y48G1C.4
chrI	52406	52407	+	Y48G1C.4
chrI	52409	52410	+	Y48G1C.4
chrI	52410	52411	+	Y48G1C.4
chrI	52414	52415	+	Y48G1C.4
chrI	52465	52466	+	Y48G1C.4
chrI	52571	52572	+	Y48G1C.4
chrI	52572	52573	+	Y48G1C.4
chrI	53265	53266	+	Y48G1C.4
chrI	53336	53337	+	Y48G1C.4
chrI	53337	53338	+	Y48G1C.4
chrI	53390	53391	+	Y48G1C.4
chrI	53694	53695	+	Y48G1C.4
chrI	53695	53696	+	Y48G1C.4
chrI	53943	53944	+	Y48G1C.4
chrI	71932	71933	+	Y48G1C.2
chrI	72510	72511	+	Y48G1C.2
chrI	72590	72591	+	Y48G1C.2
chrI	72646	72647	+	Y48G1C.2
chrI	72897	72898	+	Y48G1C.2
chrI	72940	72941	+	Y48G1C.2
chrI	73017	73018	+	Y48G1C.2
chrI	73604	73605	+	Y48G1C.2
chrI	73766	73767	+	Y48G1C.2
chrI	74624	74625	+	Y48G1C.2
chrI	74808	74809	+	Y48G1C.2
chrI	75170	75171	+	Y48G1C.2
chrI	75490	75491	+	Y48G1C.2
chrI	75950	75951	+	Y48G1C.2
chrI	76112	76113	+	Y48G1C.2
chrI	76948	76949	+	Y48G1C.2
chrI	77153	77154	+	Y48G1C.2
chrI	77712	77713	+	Y48G1C.2
chrI	77799	77800	+	Y48G1C.2
chrI	79312	79313	+	Y48G1C.2
chrI	79447	79448	+	Y48G1C.2
chrI	80305	80306	+	Y48G1C.2
chrI	81066	81067	+	Y48G1C.2
chrI	91593	91594	+	Y48G1C.9
chrI	91594	91595	+	Y48G1C.9
chrI	92522	92523	+	Y48G1C.9
chrI	93135	93136	+	Y48G1C.1
chrI	93136	93137	+	Y48G1C.1
chrI	93181	93182	+	Y48G1C.1
chrI	93350	93351	+	Y48G1C.1
chrI	93418	93419	+	Y48G1C.1
chrI	93555	93556	+	Y48G1C.1
chrI	93556	93557	+	Y48G1C.1
chrI	93608	93609	+	Y48G1C.1
chrI	94014	94015	+	Y48G1C.1
chrI	94015	94016	+	Y48G1C.1
chrI	94063	94064	+	Y48G1C.1
chrI	94207	94208	+	Y48G1C.1
chrI	94208	94209	+	Y48G1C.1
chrI	94268	94269	+	Y48G1C.1
chrI	94567	94568	+	Y48G1C.1
chrI	94568	94569	+	Y48G1C.1
chrI	94621	94622	+	Y48G1C.1
chrI	94929	94930	-	Y48G1C.13
chrI	94971	94972	-	Y48G1C.13
chrI	95118	95119	-	Y48G1C.13
chrI	95236	95237	-	Y48G1C.13
chrI	96991	96992	-	Y48G1C.8
chrI	96992	96993	-	Y48G1C.8
chrI	97599	97600	-	Y48G1C.8
chrI	97959	97960	-	Y48G1C.8
chrI	97960	97961	-	Y48G1C.8
chrI	98284	98285	-	Y48G1C.8
chrI	98294	98295	-	Y48G1C.8
chrI	99057	99058	-	Y48G1C.8
chrI	99058	99059	-	Y48G1C.8
chrI	99628	99629	-	Y48G1C.8
chrI	99788	99789	-	Y48G1C.8
chrI	99789	99790	-	Y48G1C.8
chrI	100134	100135	-	Y48G1C.8
chrI	100138	100139	-	Y48G1C.8
chrI	100322	100323	-	Y48G1C.8
chrI	100323	100324	-	Y48G1C.8
chrI	100337	100338	-	Y48G1C.8
chrI	100394	100395	-	Y48G1C.8
chrI	100624	100625	-	Y48G1C.8
chrI	100625	100626	-	Y48G1C.8
chrI	101504	101505	-	Y48G1C.8
chrI	101732	101733	-	Y48G1C.8
chrI	101733	101734	-	Y48G1C.8
chrI	102447	102448	-	Y48G1C.8
chrI	103215	103216	-	Y48G1C.8
chrI	103216	103217	-	Y48G1C.8
chrI	104439	104440	-	Y48G1C.8
chrI	104712	104713	-	Y48G1C.8
chrI	104713	104714	-	Y48G1C.8
chrI	105435	105436	-	Y48G1C.8
chrI	105620	105621	-	Y48G1C.8
chrI	105621	105622	-	Y48G1C.8
chrI	106015	106016	-	Y48G1C.8
chrI	106333	106334	-	Y48G1C.8
chrI	106334	106335	-	Y48G1C.8
chrI	106688	106689	-	Y48G1C.8
chrI	106818	106819	-	Y48G1C.8
chrI	106819	106820	-	Y48G1C.8
chrI	107355	107356	-	Y48G1C.8
chrI	107547	107548	-	Y48G1C.8
chrI	107548	107549	-	Y48G1C.8
chrI	107595	107596	-	Y48G1C.8
chrI	108684	108685	-	F53G12.1
chrI	109445	109446	-	F53G12.1
chrI	109446	109447	-	F53G12.1
chrI	109491	109492	-	F53G12.1
chrI	109782	109783	-	F53G12.1
chrI	109783	109784	-	F53G12.1
chrI	109834	109835	-	F53G12.1
chrI	109955	109956	-	F53G12.1
chrI	109956	109957	-	F53G12.1
chrI	110004	110005	-	F53G12.1
chrI	111065	111066	+	F53G12.10
chrI	111160	111161	+	F53G12.10
chrI	111245	111246	+	F53G12.10
chrI	111260	111261	+	F53G12.10
chrI	111509	111510	+	F53G12.10
chrI	111707	111708	+	F53G12.10
chrI	111715	111716	+	F53G12.10
chrI	111754	111755	+	F53G12.10
chrI	111781	111782	+	F53G12.10
chrI	111955	111956	+	F53G12.10
chrI	111971	111972	+	F53G12.10
chrI	111995	111996	+	F53G12.10
chrI	112010	112011	+	F53G12.10
chrI	112018	112019	+	F53G12.10
chrI	112086	112087	+	F53G12.10
chrI	112187	112188	+	F53G12.10
chrI	113863	113864	+	F53G12.8
chrI	114084	114085	+	F53G12.8
chrI	114423	114424	+	F53G12.8
chrI	114543	114544	+	F53G12.8
chrI	115915	115916	+	F53G12.7
chrI	116431	116432	+	F53G12.7
chrI	116666	116667	+	F53G12.7
chrI	116718	116719	+	F53G12.7
chrI	116974	116975	+	F53G12.7
chrI	117085	117086	+	F53G12.7
chrI	127336	127337	+	F53G12.5
chrI	127384	127385	+	F53G12.5
chrI	127436	127437	+	F53G12.5
chrI	128696	128697	+	F53G12.5
chrI	128895	128896	+	F53G12.5
chrI	128896	128897	+	F53G12.5
chrI	128944	128945	+	F53G12.5
chrI	129123	129124	+	F53G12.5
chrI	129124	129125	+	F53G12.5
chrI	129166	129167	+	F53G12.5
chrI	129175	129176	+	F53G12.5
chrI	129332	129333	+	F53G12.5
chrI	129333	129334	+	F53G12.5
chrI	132102	132103	+	F53G12.5
chrI	132552	132553	+	F53G12.5
chrI	132553	132554	+	F53G12.5
chrI	132601	132602	+	F53G12.5
chrI	132611	132612	+	F53G12.5
chrI	132692	132693	+	F53G12.5
chrI	132693	132694	+	F53G12.5
chrI	133413	133414	+	F53G12.5
chrI	133834	133835	+	F53G12.5
chrI	134010	134011	+	F53G12.5
chrI	146748	146749	-	F56C11.1
chrI	146792	146793	-	F56C11.1
chrI	146924	146925	-	F56C11.1
chrI	147053	147054	-	F56C11.1
chrI	147731	147732	-	F56C11.1
chrI	147783	147784	-	F56C11.1
chrI	147994	147995	-	F56C11.1
chrI	148098	148099	-	F56C11.1
chrI	148223	148224	-	F56C11.1
chrI	149059	149060	-	F56C11.1
chrI	149259	149260	-	F56C11.1
chrI	149302	149303	-	F56C11.1
chrI	149472	149473	-	F56C11.1
chrI	149519	149520	-	F56C11.1
chrI	149817	149818	-	F56C11.1
chrI	150386	150387	-	F56C11.1
chrI	150390	150391	-	F56C11.1
chrI	150688	150689	-	F56C11.1
chrI	150733	150734	-	F56C11.1
chrI	151182	151183	-	F56C11.1
chrI	151226	151227	-	F56C11.1
chrI	151383	151384	-	F56C11.1
chrI	151460	151461	-	F56C11.1
chrI	151674	151675	-	F56C11.1
chrI	152068	152069	-	F56C11.1
chrI	152360	152361	-	F56C11.1
chrI	152406	152407	-	F56C11.1
chrI	152658	152659	-	F56C11.1
chrI	152705	152706	-	F56C11.1
chrI	152909	152910	-	F56C11.1
chrI	152955	152956	-	F56C11.1
chrI	153345	153346	-	F56C11.1
chrI	153394	153395	-	F56C11.1
chrI	153553	153554	-	F56C11.1
chrI	153602	153603	-	F56C11.1
chrI	153680	153681	-	F56C11.1
chrI	154665	154666	-	F56C11.1
chrI	154758	154759	-	F56C11.1
chrI	160546	160547	-	F56C11.2
chrI	160711	160712	-	F56C11.2
chrI	160999	161000	-	F56C11.2
chrI	161596	161597	-	F56C11.2
chrI	161889	161890	-	F56C11.2
chrI	162363	162364	-	F56C11.2
chrI	162367	162368	-	F56C11.2
chrI	162597	162598	-	F56C11.2
chrI	162644	162645	-	F56C11.2
chrI	162717	162718	-	F56C11.2
chrI	163098	163099	-	F56C11.2
chrI	163430	163431	-	F56C11.2
chrI	163499	163500	-	F56C11.2
chrI	163608	163609	-	F56C11.2
chrI	163808	163809	-	F56C11.2
chrI	164203	164204	-	F56C11.2
chrI	164676	164677	-	F56C11.2
chrI	164765	164766	-	F56C11.2
chrI	164899	164900	-	F56C11.2
chrI	165008	165009	-	F56C11.2
chrI	165376	165377	-	F56C11.2
chrI	165487	165488	-	F56C11.2
chrI	165542	165543	-	F56C11.2
chrI	165660	165661	-	F56C11.2
chrI	165997	165998	-	F56C11.2
chrI	166001	166002	-	F56C11.2
chrI	166104	166105	-	F56C11.2
chrI	166746	166747	-	F56C11.2
chrI	173507	173508	+	F56C11.6
chrI	173508	173509	+	F56C11.6
chrI	173560	173561	+	F56C11.6
chrI	173724	173725	+	F56C11.6
chrI	173725	173726	+	F56C11.6
chrI	173774	173775	+	F56C11.6
chrI	174311	174312	+	F56C11.6
chrI	174312	174313	+	F56C11.6
chrI	174604	174605	+	F56C11.6
chrI	174831	174832	+	F56C11.6
chrI	174832	174833	+	F56C11.6
chrI	174877	174878	+	F56C11.6
chrI	175052	175053	+	F56C11.6
chrI	175053	175054	+	F56C11.6
chrI	175096	175097	+	F56C11.6
chrI	175240	175241	+	F56C11.6
chrI	175241	175242	+	F56C11.6
chrI	175578	175579	+	F56C11.6
chrI	175707	175708	+	F56C11.6
chrI	175708	175709	+	F56C11.6
chrI	175754	175755	+	F56C11.6
chrI	178620	178621	+	F56C11.5
chrI	180465	180466	+	F56C11.5
chrI	180599	180600	+	F56C11.5
chrI	180698	180699	+	F56C11.5
chrI	181250	181251	+	F56C11.5
chrI	181514	181515	+	F56C11.5
chrI	181662	181663	+	F56C11.5
chrI	181767	181768	+	F56C11.5
chrI	181813	181814	+	F56C11.5
chrI	254802	254803	-	Y48G1BR.1
chrI	254975	254976	-	Y48G1BR.1
chrI	255079	255080	-	Y48G1BR.1
chrI	255194	255195	-	Y48G1BR.1
chrI	255325	255326	-	Y48G1BR.1
chrI	255369	255370	-	Y48G1BR.1
chrI	255446	255447	-	Y48G1BR.1
chrI	255817	255818	-	Y48G1BR.1
chrI	255960	255961	-	Y48G1BR.1
chrI	256315	256316	-	Y48G1BR.1
chrI	256643	256644	-	Y48G1BR.1
chrI	257417	257418	-	Y48G1BR.1
chrI	257661	257662	-	Y48G1BR.1
chrI	258020	258021	-	Y48G1BR.1
chrI	258358	258359	-	Y48G1BR.1
chrI	258547	258548	-	Y48G1BR.1
chrI	258683	258684	-	Y48G1BR.1
chrI	259106	259107	-	Y48G1BR.1
chrI	280206	280207	+	C53D5.3
chrI	280310	280311	+	C53D5.3
chrI	280431	280432	+	C53D5.3
chrI	283319	283320	+	C53D5.2
chrI	283518	283519	+	C53D5.2
chrI	283649	283650	+	C53D5.2
chrI	284308	284309	+	C53D5.2
chrI	284538	284539	+	C53D5.2
chrI	285007	285008	+	C53D5.2
chrI	285211	285212	+	C53D5.2
chrI	285557	285558	+	C53D5.2
chrI	285638	285639	+	C53D5.2
chrI	285834	285835	+	C53D5.2
chrI	286420	286421	-	C53D5.4
chrI	286873	286874	-	C53D5.4
chrI	286997	286998	-	C53D5.4
chrI	287508	287509	-	C53D5.4
chrI	288003	288004	-	C53D5.4
chrI	288557	288558	-	C53D5.4
chrI	288644	288645	-	C53D5.4
chrI	288749	288750	-	C53D5.4
chrI	288902	288903	-	C53D5.4
chrI	288972	288973	-	C53D5.4
chrI	291311	291312	+	C53D5.1
chrI	295791	295792	+	C53D5.1
chrI	295850	295851	+	C53D5.1
chrI	302594	302595	+	C53D5.1
chrI	302704	302705	+	C53D5.1
chrI	302760	302761	+	C53D5.1
chrI	302830	302831	+	C53D5.1
chrI	303202	303203	+	C53D5.1
chrI	303728	303729	+	C53D5.1
chrI	303787	303788	+	C53D5.1
chrI	303909	303910	+	C53D5.1
chrI	304092	304093	+	C53D5.1
chrI	304255	304256	+	C53D5.1
chrI	304927	304928	+	C53D5.1
chrI	306087	306088	-	C53D5.5
chrI	306088	306089	-	C53D5.5
chrI	306289	306290	-	C53D5.5
chrI	306607	306608	-	C53D5.5
chrI	306608	306609	-	C53D5.5
chrI	307090	307091	-	C53D5.5
chrI	307813	307814	-	C53D5.5
chrI	307814	307815	-	C53D5.5
chrI	308200	308201	-	C53D5.5
chrI	308268	308269	-	C53D5.5
chrI	308570	308571	-	C53D5.5
chrI	308790	308791	-	C53D5.5
chrI	308791	308792	-	C53D5.5
chrI	309204	309205	-	C53D5.5
chrI	309433	309434	-	C53D5.5
chrI	309434	309435	-	C53D5.5
chrI	309541	309542	-	C53D5.5
chrI	309760	309761	-	C53D5.5
chrI	309762	309763	-	C53D5.5
chrI	310077	310078	-	C53D5.5
chrI	310761	310762	-	C53D5.5
chrI	311195	311196	-	C53D5.6
chrI	311405	311406	-	C53D5.6
chrI	311575	311576	-	C53D5.6
chrI	311576	311577	-	C53D5.6
chrI	311590	311591	-	C53D5.6
chrI	311629	311630	-	C53D5.6
chrI	311633	311634	-	C53D5.6
chrI	311637	311638	-	C53D5.6
chrI	311642	311643	-	C53D5.6
chrI	311764	311765	-	C53D5.6
chrI	311775	311776	-	C53D5.6
chrI	311783	311784	-	C53D5.6
chrI	311784	311785	-	C53D5.6
chrI	311831	311832	-	C53D5.6
chrI	311835	311836	-	C53D5.6
chrI	311839	311840	-	C53D5.6
chrI	311987	311988	-	C53D5.6
chrI	312013	312014	-	C53D5.6
chrI	312126	312127	-	C53D5.6
chrI	312605	312606	-	C53D5.6
chrI	312672	312673	-	C53D5.6
chrI	312737	312738	-	C53D5.6
chrI	312877	312878	-	C53D5.6
chrI	312878	312879	-	C53D5.6
chrI	312886	312887	-	C53D5.6
chrI	312925	312926	-	C53D5.6
chrI	312964	312965	-	C53D5.6
chrI	313488	313489	-	C53D5.6
chrI	313553	313554	-	C53D5.6
chrI	313632	313633	-	C53D5.6
chrI	313717	313718	-	C53D5.6
chrI	313740	313741	-	C53D5.6
chrI	313771	313772	-	C53D5.6
chrI	313841	313842	-	C53D5.6
chrI	313842	313843	-	C53D5.6
chrI	313887	313888	-	C53D5.6
chrI	314101	314102	-	C53D5.6
chrI	314102	314103	-	C53D5.6
chrI	314153	314154	-	C53D5.6
chrI	314551	314552	-	C53D5.6
chrI	314664	314665	-	C53D5.6
chrI	314773	314774	-	C53D5.6
chrI	314774	314775	-	C53D5.6
chrI	314817	314818	-	C53D5.6
chrI	314818	314819	-	C53D5.6
chrI	314822	314823	-	C53D5.6
chrI	314870	314871	-	C53D5.6
chrI	314921	314922	-	C53D5.6
chrI	317144	317145	-	Y48G1A.7
chrI	317191	317192	-	Y48G1A.7
chrI	317606	317607	-	Y48G1A.7
chrI	318000	318001	-	Y48G1A.7
chrI	319127	319128	-	Y48G1A.5
chrI	319128	319129	-	Y48G1A.5
chrI	319733	319734	-	Y48G1A.5
chrI	319737	319738	-	Y48G1A.5
chrI	319739	319740	-	Y48G1A.5
chrI	320416	320417	-	Y48G1A.5
chrI	320417	320418	-	Y48G1A.5
chrI	321074	321075	-	Y48G1A.5
chrI	322005	322006	-	Y48G1A.5
chrI	322084	322085	-	Y48G1A.5
chrI	322387	322388	-	Y48G1A.5
chrI	322388	322389	-	Y48G1A.5
chrI	322784	322785	-	Y48G1A.5
chrI	323092	323093	-	Y48G1A.5
chrI	323093	323094	-	Y48G1A.5
chrI	323142	323143	-	Y48G1A.5
chrI	323934	323935	+	Y48G1A.4
chrI	323978	323979	+	Y48G1A.4
chrI	324653	324654	+	Y48G1A.4
chrI	325298	325299	+	Y48G1A.4
chrI	326048	326049	+	Y48G1A.4
chrI	326958	326959	+	Y48G1A.4
chrI	327245	327246	+	Y48G1A.4
chrI	327846	327847	+	Y48G1A.4
chrI	327979	327980	+	Y48G1A.4
chrI	330110	330111	+	Y48G1A.4
chrI	332763	332764	+	Y48G1A.3
chrI	332764	332765	+	Y48G1A.3
chrI	332845	332846	+	Y48G1A.3
chrI	332948	332949	+	Y48G1A.3
chrI	332949	332950	+	Y48G1A.3
chrI	333790	333791	+	Y48G1A.3
chrI	334109	334110	+	Y48G1A.3
chrI	334110	334111	+	Y48G1A.3
chrI	335708	335709	+	Y48G1A.3
chrI	336142	336143	+	Y48G1A.3
chrI	336143	336144	+	Y48G1A.3
chrI	337564	337565	+	Y48G1A.3
chrI	343649	343650	-	Y48G1A.6
chrI	343893	343894	-	Y48G1A.6
chrI	344033	344034	-	Y48G1A.6
chrI	345020	345021	-	Y48G1A.6
chrI	345830	345831	-	Y48G1A.6
chrI	346374	346375	-	Y48G1A.6
chrI	346516	346517	-	Y48G1A.6
chrI	346560	346561	-	Y48G1A.6
chrI	346742	346743	-	Y48G1A.6
chrI	346792	346793	-	Y48G1A.6
chrI	347044	347045	-	Y48G1A.6
chrI	347092	347093	-	Y48G1A.6
chrI	347581	347582	+	Y48G1A.2
chrI	347629	347630	+	Y48G1A.2
chrI	347706	347707	+	Y48G1A.2
chrI	347761	347762	+	Y48G1A.2
chrI	347983	347984	+	Y48G1A.2
chrI	348041	348042	+	Y48G1A.2
chrI	348304	348305	+	Y48G1A.2
chrI	348619	348620	+	Y48G1A.1
chrI	348676	348677	+	Y48G1A.1
chrI	348904	348905	+	Y48G1A.1
chrI	349351	349352	+	Y48G1A.1
chrI	349680	349681	+	Y48G1A.1
chrI	350184	350185	+	Y48G1A.1
chrI	350346	350347	+	Y48G1A.1
chrI	350640	350641	+	Y48G1A.1
chrI	350985	350986	+	Y48G1A.1
chrI	351793	351794	+	Y48G1A.1
chrI	352080	352081	+	Y48G1A.1
chrI	352865	352866	+	Y48G1A.1
chrI	353172	353173	+	Y48G1A.1
chrI	353743	353744	+	Y48G1A.1
chrI	353964	353965	+	Y48G1A.1
chrI	354380	354381	+	Y48G1A.1
chrI	354699	354700	+	Y48G1A.1
chrI	355373	355374	+	Y48G1A.1
chrI	355481	355482	+	Y48G1A.1
chrI	355537	355538	+	Y48G1A.1
chrI	355817	355818	+	Y48G1A.1
chrI	356833	356834	+	Y48G1A.1
chrI	356946	356947	+	Y48G1A.1
chrI	356993	356994	+	Y48G1A.1
chrI	364678	364679	+	R119.7
chrI	364679	364680	+	R119.7
chrI	364735	364736	+	R119.7
chrI	365032	365033	+	R119.7
chrI	365132	365133	+	R119.7
chrI	365190	365191	+	R119.7
chrI	365191	365192	+	R119.7
chrI	365530	365531	+	R119.7
chrI	365595	365596	+	R119.7
chrI	365596	365597	+	R119.7
chrI	365643	365644	+	R119.7
chrI	365959	365960	+	R119.7
chrI	365960	365961	+	R119.7
chrI	366475	366476	+	R119.7
chrI	366652	366653	+	R119.7
chrI	367208	367209	+	R119.7
chrI	367209	367210	+	R119.7
chrI	367745	367746	+	R119.7
chrI	368221	368222	+	R119.7
chrI	368295	368296	+	R119.7
chrI	371947	371948	-	R119.2
chrI	372836	372837	-	R119.2
chrI	373741	373742	-	R119.3
chrI	373742	373743	-	R119.3
chrI	376308	376309	-	R119.3
chrI	377197	377198	-	R119.3
chrI	377517	377518	-	R119.3
chrI	377518	377519	-	R119.3
chrI	378570	378571	-	R119.3
chrI	378640	378641	-	R119.3
chrI	378641	378642	-	R119.3
chrI	378694	378695	-	R119.3
chrI	378702	378703	-	R119.3
chrI	378875	378876	-	R119.3
chrI	378876	378877	-	R119.3
chrI	378928	378929	-	R119.3
chrI	379062	379063	-	R119.3
chrI	379126	379127	-	R119.4
chrI	379164	379165	-	R119.4
chrI	379282	379283	-	R119.4
chrI	380068	380069	-	R119.4
chrI	380124	380125	-	R119.4
chrI	380127	380128	-	R119.4
chrI	380128	380129	-	R119.4
chrI	380178	380179	-	R119.4
chrI	380182	380183	-	R119.4
chrI	380400	380401	-	R119.4
chrI	380544	380545	-	R119.4
chrI	380554	380555	-	R119.4
chrI	380555	380556	-	R119.4
chrI	380578	380579	-	R119.4
chrI	380600	380601	-	R119.4
chrI	380604	380605	-	R119.4
chrI	380721	380722	-	R119.4
chrI	380915	380916	-	R119.4
chrI	380920	380921	-	R119.4
chrI	380921	380922	-	R119.4
chrI	380934	380935	-	R119.4
chrI	380970	380971	-	R119.4
chrI	381041	381042	-	R119.4
chrI	381158	381159	-	R119.4
chrI	381191	381192	-	R119.4
chrI	381197	381198	-	R119.4
chrI	381212	381213	-	R119.4
chrI	381217	381218	-	R119.4
chrI	381218	381219	-	R119.4
chrI	381261	381262	-	R119.4
chrI	381265	381266	-	R119.4
chrI	381271	381272	-	R119.4
chrI	381469	381470	-	R119.4
chrI	381470	381471	-	R119.4
chrI	381525	381526	-	R119.4
chrI	381659	381660	-	R119.4
chrI	381790	381791	-	R119.4
chrI	381845	381846	-	R119.4
chrI	382913	382914	+	R119.6
chrI	382988	382989	+	R119.6
chrI	383064	383065	+	R119.6
chrI	383120	383121	+	R119.6
chrI	383374	383375	+	R119.6
chrI	383428	383429	+	R119.6
chrI	383564	383565	+	R119.6
chrI	384624	384625	+	R119.6
chrI	385225	385226	+	R119.6
chrI	385841	385842	+	R119.6
chrI	385890	385891	+	R119.6
chrI	385904	385905	+	R119.6
chrI	385912	385913	+	R119.6
chrI	386068	386069	+	R119.6
chrI	386075	386076	+	R119.6
chrI	386336	386337	+	R119.6
chrI	388045	388046	+	R119.6
chrI	388150	388151	+	R119.6
chrI	388376	388377	+	R119.6
chrI	388938	388939	-	R119.5
chrI	389758	389759	-	R119.5
chrI	389820	389821	-	R119.5
chrI	390192	390193	-	R119.5
chrI	390552	390553	-	R119.5
chrI	391034	391035	-	R119.5
chrI	391100	391101	-	R119.5
chrI	391611	391612	-	R119.5
chrI	392662	392663	-	R119.5
chrI	392997	392998	-	R119.5
chrI	393122	393123	-	R119.5
chrI	393355	393356	-	R119.5
chrI	393639	393640	-	R119.5
chrI	394089	394090	-	R119.5
chrI	399047	399048	+	Y50C1A.1
chrI	399048	399049	+	Y50C1A.1
chrI	399188	399189	+	Y50C1A.1
chrI	399268	399269	+	Y50C1A.1
chrI	399269	399270	+	Y50C1A.1
chrI	399952	399953	+	Y50C1A.1
chrI	400104	400105	+	Y50C1A.1
chrI	400105	400106	+	Y50C1A.1
chrI	401954	401955	+	Y50C1A.1
chrI	402046	402047	+	Y50C1A.1
chrI	402047	402048	+	Y50C1A.1
chrI	402292	402293	+	Y50C1A.1
chrI	402416	402417	+	Y50C1A.1
chrI	402417	402418	+	Y50C1A.1
chrI	403513	403514	+	Y50C1A.1
chrI	403716	403717	+	Y50C1A.1
chrI	403717	403718	+	Y50C1A.1
chrI	406062	406063	+	Y50C1A.1
chrI	406230	406231	+	Y50C1A.1
chrI	406231	406232	+	Y50C1A.1
chrI	407369	407370	+	Y50C1A.1
chrI	407543	407544	+	Y50C1A.1
chrI	407544	407545	+	Y50C1A.1
chrI	408520	408521	+	Y50C1A.1
chrI	408762	408763	+	Y50C1A.1
chrI	408763	408764	+	Y50C1A.1
chrI	410343	410344	+	Y50C1A.1
chrI	410625	410626	+	Y50C1A.1
chrI	410626	410627	+	Y50C1A.1
chrI	411202	411203	+	Y50C1A.1
chrI	411347	411348	+	Y50C1A.1
chrI	411434	411435	+	Y50C1A.1
chrI	412412	412413	+	Y50C1A.1
chrI	412440	412441	+	Y50C1A.1
chrI	444109	444110	+	C07F11.1
chrI	444253	444254	+	C07F11.1
chrI	444358	444359	+	C07F11.1
chrI	444376	444377	+	C07F11.1
chrI	444993	444994	+	C07F11.1
chrI	445084	445085	+	C07F11.1
chrI	446707	446708	+	C07F11.1
chrI	446782	446783	+	C07F11.1
chrI	446913	446914	+	C07F11.1
chrI	447051	447052	+	C07F11.1
chrI	450196	450197	+	C07F11.1
chrI	450306	450307	+	C07F11.1
chrI	450481	450482	+	C07F11.1
chrI	450573	450574	+	C07F11.1
chrI	450759	450760	+	C07F11.1
chrI	451294	451295	+	C07F11.1
chrI	451465	451466	+	C07F11.1
chrI	455355	455356	+	C07F11.1
chrI	455491	455492	+	C07F11.1
chrI	455545	455546	+	C07F11.1
chrI	455721	455722	+	C07F11.1
chrI	456855	456856	+	C07F11.1
chrI	456994	456995	+	C07F11.1
chrI	457235	457236	+	C07F11.1
chrI	458621	458622	+	C07F11.1
chrI	459568	459569	+	C07F11.1
chrI	460062	460063	+	C07F11.1
chrI	460949	460950	+	C07F11.1
chrI	462172	462173	+	W04C9.4
chrI	462173	462174	+	W04C9.4
chrI	462229	462230	+	W04C9.4
chrI	462317	462318	+	W04C9.4
chrI	462318	462319	+	W04C9.4
chrI	462370	462371	+	W04C9.4
chrI	471289	471290	+	W04C9.8
chrI	472228	472229	+	W04C9.8
chrI	472507	472508	+	W04C9.8
chrI	473717	473718	+	W04C9.8
chrI	473786	473787	+	W04C9.8
chrI	473832	473833	+	W04C9.8
chrI	477732	477733	+	W04C9.3
chrI	478213	478214	+	W04C9.3
chrI	478323	478324	+	W04C9.3
chrI	478464	478465	+	W04C9.3
chrI	478743	478744	+	W04C9.3
chrI	478878	478879	+	W04C9.3
chrI	479109	479110	+	W04C9.3
chrI	479933	479934	+	W04C9.3
chrI	480181	480182	+	W04C9.3
chrI	480750	480751	+	W04C9.3
chrI	481129	481130	+	W04C9.3
chrI	481837	481838	+	W04C9.3
chrI	488637	488638	+	W04C9.2
chrI	488722	488723	+	W04C9.2
chrI	488723	488724	+	W04C9.2
chrI	488767	488768	+	W04C9.2
chrI	488772	488773	+	W04C9.2
chrI	488832	488833	+	W04C9.2
chrI	488833	488834	+	W04C9.2
chrI	488881	488882	+	W04C9.2
chrI	488943	488944	+	W04C9.2
chrI	488944	488945	+	W04C9.2
chrI	489699	489700	+	W04C9.2
chrI	490201	490202	+	W04C9.1
chrI	490202	490203	+	W04C9.1
chrI	491196	491197	+	W04C9.1
chrI	491301	491302	+	W04C9.1
chrI	491302	491303	+	W04C9.1
chrI	491349	491350	+	W04C9.1
chrI	491535	491536	+	W04C9.1
chrI	491558	491559	+	W04C9.1
chrI	491559	491560	+	W04C9.1
chrI	491609	491610	+	W04C9.1
chrI	491723	491724	+	W04C9.1
chrI	491724	491725	+	W04C9.1
chrI	491835	491836	+	W04C9.1
chrI	492159	492160	+	W04C9.1
chrI	492160	492161	+	W04C9.1
chrI	492164	492165	+	W04C9.1
chrI	492224	492225	+	W04C9.1
chrI	492350	492351	+	W04C9.1
chrI	492351	492352	+	W04C9.1
chrI	492355	492356	+	W04C9.1
chrI	492866	492867	+	W04C9.1
chrI	493555	493556	+	W04C9.1
chrI	493556	493557	+	W04C9.1
chrI	494259	494260	+	W04C9.1
chrI	494342	494343	+	W04C9.1
chrI	494343	494344	+	W04C9.1
chrI	494391	494392	+	W04C9.1
chrI	494705	494706	+	W04C9.1
chrI	494706	494707	+	W04C9.1
chrI	495827	495828	+	W04C9.1
chrI	496282	496283	-	Y65B4BL.3
chrI	496283	496284	-	Y65B4BL.3
chrI	496329	496330	-	Y65B4BL.3
chrI	496463	496464	-	Y65B4BL.3
chrI	496464	496465	-	Y65B4BL.3
chrI	497689	497690	-	Y65B4BL.3
chrI	497829	497830	-	Y65B4BL.3
chrI	497830	497831	-	Y65B4BL.3
chrI	498426	498427	-	Y65B4BL.3
chrI	498566	498567	-	Y65B4BL.3
chrI	498567	498568	-	Y65B4BL.3
chrI	499792	499793	-	Y65B4BL.3
chrI	500118	500119	-	Y65B4BL.3
chrI	500119	500120	-	Y65B4BL.3
chrI	501928	501929	-	Y65B4BL.3
chrI	503212	503213	-	Y65B4BL.4
chrI	504056	504057	-	Y65B4BL.4
chrI	504132	504133	-	Y65B4BL.4
chrI	504224	504225	-	Y65B4BL.4
chrI	504278	504279	-	Y65B4BL.4
chrI	504322	504323	-	Y65B4BL.4
chrI	504454	504455	-	Y65B4BL.4
chrI	505505	505506	-	Y65B4BL.4
chrI	505605	505606	-	Y65B4BL.4
chrI	505659	505660	-	Y65B4BL.4
chrI	505771	505772	-	Y65B4BL.4
chrI	505819	505820	-	Y65B4BL.4
chrI	506049	506050	-	Y65B4BL.4
chrI	506092	506093	-	Y65B4BL.4
chrI	506581	506582	+	Y65B4BL.2
chrI	506586	506587	+	Y65B4BL.2
chrI	506587	506588	+	Y65B4BL.2
chrI	506589	506590	+	Y65B4BL.2
chrI	506637	506638	+	Y65B4BL.2
chrI	506638	506639	+	Y65B4BL.2
chrI	506640	506641	+	Y65B4BL.2
chrI	506744	506745	+	Y65B4BL.2
chrI	506745	506746	+	Y65B4BL.2
chrI	506749	506750	+	Y65B4BL.2
chrI	506801	506802	+	Y65B4BL.2
chrI	507015	507016	+	Y65B4BL.2
chrI	507016	507017	+	Y65B4BL.2
chrI	507064	507065	+	Y65B4BL.2
chrI	507067	507068	+	Y65B4BL.2
chrI	507224	507225	+	Y65B4BL.2
chrI	507225	507226	+	Y65B4BL.2
chrI	507276	507277	+	Y65B4BL.2
chrI	507407	507408	+	Y65B4BL.2
chrI	507408	507409	+	Y65B4BL.2
chrI	507453	507454	+	Y65B4BL.2
chrI	507704	507705	+	Y65B4BL.2
chrI	507705	507706	+	Y65B4BL.2
chrI	507754	507755	+	Y65B4BL.2
chrI	507894	507895	+	Y65B4BL.2
chrI	507895	507896	+	Y65B4BL.2
chrI	507943	507944	+	Y65B4BL.2
chrI	508047	508048	+	Y65B4BL.2
chrI	508048	508049	+	Y65B4BL.2
chrI	508057	508058	+	Y65B4BL.2
chrI	508097	508098	+	Y65B4BL.2
chrI	508330	508331	+	Y65B4BL.2
chrI	508331	508332	+	Y65B4BL.2
chrI	508381	508382	+	Y65B4BL.2
chrI	508490	508491	+	Y65B4BL.2
chrI	508491	508492	+	Y65B4BL.2
chrI	508537	508538	+	Y65B4BL.2
chrI	508756	508757	+	Y65B4BL.2
chrI	508757	508758	+	Y65B4BL.2
chrI	508804	508805	+	Y65B4BL.2
chrI	509214	509215	-	Y65B4BL.7
chrI	509261	509262	-	Y65B4BL.7
chrI	509423	509424	-	Y65B4BL.7
chrI	509747	509748	-	Y65B4BL.7
chrI	509888	509889	-	Y65B4BL.7
chrI	510738	510739	-	Y65B4BL.7
chrI	511753	511754	-	Y65B4BL.5
chrI	512476	512477	-	Y65B4BL.5
chrI	512480	512481	-	Y65B4BL.5
chrI	513090	513091	-	Y65B4BL.5
chrI	513138	513139	-	Y65B4BL.5
chrI	513142	513143	-	Y65B4BL.5
chrI	513725	513726	-	Y65B4BL.5
chrI	513775	513776	-	Y65B4BL.5
chrI	514208	514209	-	Y65B4BL.5
chrI	515022	515023	-	Y65B4BL.5
chrI	515236	515237	-	Y65B4BL.5
chrI	516350	516351	-	Y65B4BL.5
chrI	516456	516457	-	Y65B4BL.5
chrI	519581	519582	-	Y65B4BL.5
chrI	520408	520409	-	Y65B4BL.6
chrI	521319	521320	-	Y65B4BL.6
chrI	531091	531092	+	Y65B4BL.1
chrI	531266	531267	+	Y65B4BL.1
chrI	531348	531349	+	Y65B4BL.1
chrI	531458	531459	+	Y65B4BL.1
chrI	531773	531774	+	Y65B4BL.1
chrI	531789	531790	+	Y65B4BL.1
chrI	531877	531878	+	Y65B4BL.1
chrI	531892	531893	+	Y65B4BM.3
chrI	531893	531894	+	Y65B4BM.3
chrI	531897	531898	+	Y65B4BM.3
chrI	531946	531947	+	Y65B4BM.3
chrI	532089	532090	+	Y65B4BM.3
chrI	532451	532452	+	Y65B4BM.3
chrI	532552	532553	+	Y65B4BM.3
chrI	532553	532554	+	Y65B4BM.3
chrI	532618	532619	+	Y65B4BM.3
chrI	532725	532726	+	Y65B4BM.3
chrI	534568	534569	+	Y65B4BR.8
chrI	534569	534570	+	Y65B4BR.8
chrI	534617	534618	+	Y65B4BR.8
chrI	534723	534724	+	Y65B4BR.8
chrI	534724	534725	+	Y65B4BR.8
chrI	534771	534772	+	Y65B4BR.8
chrI	534969	534970	+	Y65B4BR.8
chrI	534970	534971	+	Y65B4BR.8
chrI	535030	535031	+	Y65B4BR.8
chrI	535840	535841	+	Y65B4BR.5
chrI	535848	535849	+	Y65B4BR.5
chrI	535849	535850	+	Y65B4BR.5
chrI	535853	535854	+	Y65B4BR.5
chrI	535898	535899	+	Y65B4BR.5
chrI	536305	536306	+	Y65B4BR.5
chrI	536306	536307	+	Y65B4BR.5
chrI	536314	536315	+	Y65B4BR.5
chrI	536347	536348	+	Y65B4BR.5
chrI	536348	536349	+	Y65B4BR.5
chrI	536349	536350	+	Y65B4BR.5
chrI	536355	536356	+	Y65B4BR.5
chrI	536358	536359	+	Y65B4BR.5
chrI	536376	536377	+	Y65B4BR.5
chrI	536407	536408	+	Y65B4BR.5
chrI	536435	536436	+	Y65B4BR.5
chrI	537243	537244	+	Y65B4BR.4
chrI	537302	537303	+	Y65B4BR.4
chrI	537560	537561	+	Y65B4BR.4
chrI	537605	537606	+	Y65B4BR.4
chrI	537835	537836	+	Y65B4BR.4
chrI	538701	538702	+	Y65B4BR.4
chrI	538911	538912	+	Y65B4BR.4
chrI	539452	539453	+	Y65B4BR.4
chrI	539727	539728	+	Y65B4BR.4
chrI	539800	539801	+	Y65B4BR.4
chrI	540008	540009	+	Y65B4BR.4
chrI	540063	540064	+	Y65B4BR.4
chrI	540384	540385	+	Y65B4BR.4
chrI	540722	540723	+	Y65B4BR.4
chrI	540983	540984	+	Y65B4BR.4
chrI	541063	541064	+	Y65B4BR.4
chrI	541285	541286	+	Y65B4BR.4
chrI	541343	541344	+	Y65B4BR.4
chrI	557572	557573	+	Y65B4BR.2
chrI	558403	558404	+	Y65B4BR.2
chrI	558543	558544	+	Y65B4BR.2
chrI	559405	559406	+	Y65B4BR.2
chrI	559506	559507	+	Y65B4BR.2
chrI	559663	559664	+	Y65B4BR.2
chrI	559705	559706	+	Y65B4BR.2
chrI	559867	559868	+	Y65B4BR.2
chrI	560701	560702	+	Y65B4BR.2
chrI	560798	560799	+	Y65B4BR.2
chrI	561400	561401	+	Y65B4BR.2
chrI	572603	572604	-	Y65B4BR.6
chrI	572604	572605	-	Y65B4BR.6
chrI	572888	572889	-	Y65B4BR.6
chrI	572992	572993	-	Y65B4BR.6
chrI	572993	572994	-	Y65B4BR.6
chrI	573639	573640	-	Y65B4BR.6
chrI	573892	573893	-	Y65B4BR.6
chrI	573893	573894	-	Y65B4BR.6
chrI	574072	574073	-	Y65B4BR.6
chrI	574073	574074	-	Y65B4BR.6
chrI	574144	574145	-	Y65B4BR.6
chrI	574661	574662	-	Y65B4BR.6
chrI	574662	574663	-	Y65B4BR.6
chrI	574929	574930	-	Y65B4BR.6
chrI	586133	586134	-	F56A6.2
chrI	587153	587154	-	F56A6.2
chrI	587278	587279	-	F56A6.2
chrI	587332	587333	-	F56A6.2
chrI	587658	587659	-	F56A6.2
chrI	588628	588629	-	F56A6.2
chrI	588757	588758	-	F56A6.2
chrI	588813	588814	-	F56A6.2
chrI	588872	588873	-	F56A6.2
chrI	588927	588928	-	F56A6.2
chrI	589058	589059	-	F56A6.2
chrI	590157	590158	-	F56A6.2
chrI	590346	590347	-	F56A6.2
chrI	591534	591535	-	F56A6.2
chrI	591607	591608	-	F56A6.2
chrI	591741	591742	-	F56A6.2
chrI	591860	591861	-	F56A6.2
chrI	591936	591937	-	F56A6.2
chrI	592122	592123	-	F56A6.2
chrI	592440	592441	-	F56A6.2
chrI	592516	592517	-	F56A6.2
chrI	592571	592572	-	F56A6.2
chrI	592692	592693	-	F56A6.2
chrI	593228	593229	-	F56A6.2
chrI	593493	593494	-	F56A6.2
chrI	593536	593537	-	F56A6.2
chrI	593735	593736	-	F56A6.2
chrI	595185	595186	-	F56A6.2
chrI	595958	595959	-	F56A6.2
chrI	596333	596334	-	F56A6.2
chrI	596695	596696	-	F56A6.2
chrI	597638	597639	-	F56A6.2
chrI	597825	597826	-	F56A6.2
chrI	597884	597885	-	F56A6.2
chrI	597971	597972	-	F56A6.2
chrI	598560	598561	-	F56A6.2
chrI	598659	598660	-	F56A6.2
chrI	601169	601170	-	F56A6.2
chrI	601375	601376	-	F56A6.2
chrI	601418	601419	-	F56A6.2
chrI	601542	601543	-	F56A6.2
chrI	601603	601604	-	F56A6.2
chrI	601771	601772	-	F56A6.2
chrI	603125	603126	-	F56A6.2
chrI	603281	603282	-	F56A6.2
chrI	603374	603375	-	F56A6.2
chrI	603474	603475	-	F56A6.2
chrI	603523	603524	-	F56A6.2
chrI	603586	603587	-	F56A6.2
chrI	604329	604330	-	F56A6.2
chrI	604593	604594	-	F56A6.2
chrI	604894	604895	-	F56A6.2
chrI	605139	605140	-	F56A6.2
chrI	606568	606569	-	F56A6.2
chrI	606852	606853	-	F56A6.2
chrI	607360	607361	-	F56A6.2
chrI	615001	615002	-	F56A6.4
chrI	615820	615821	-	F56A6.4
chrI	616114	616115	-	F56A6.4
chrI	623626	623627	-	F56A6.4
chrI	623716	623717	-	F56A6.4
chrI	624217	624218	-	F56A6.4
chrI	624375	624376	-	F56A6.4
chrI	625363	625364	-	F56A6.4
chrI	625472	625473	-	F56A6.4
chrI	625521	625522	-	F56A6.4
chrI	625629	625630	-	F56A6.4
chrI	627137	627138	-	F56A6.4
chrI	627363	627364	-	F56A6.4
chrI	629343	629344	-	F56A6.4
chrI	637003	637004	+	Y65B4A.3
chrI	637010	637011	+	Y65B4A.3
chrI	637054	637055	+	Y65B4A.3
chrI	637064	637065	+	Y65B4A.3
chrI	637174	637175	+	Y65B4A.3
chrI	637249	637250	+	Y65B4A.3
chrI	637337	637338	+	Y65B4A.3
chrI	637396	637397	+	Y65B4A.3
chrI	637706	637707	+	Y65B4A.3
chrI	637763	637764	+	Y65B4A.3
chrI	637769	637770	+	Y65B4A.3
chrI	645571	645572	+	Y65B4A.2
chrI	647806	647807	+	Y65B4A.2
chrI	648074	648075	+	Y65B4A.2
chrI	648711	648712	+	Y65B4A.2
chrI	649004	649005	+	Y65B4A.2
chrI	649592	649593	+	Y65B4A.2
chrI	649748	649749	+	Y65B4A.2
chrI	652007	652008	+	Y65B4A.2
chrI	652373	652374	+	Y65B4A.2
chrI	653677	653678	+	Y65B4A.2
chrI	654227	654228	+	Y65B4A.1
chrI	654281	654282	+	Y65B4A.1
chrI	655059	655060	+	Y65B4A.1
chrI	656559	656560	+	Y65B4A.1
chrI	656746	656747	+	Y65B4A.1
chrI	656750	656751	+	Y65B4A.1
chrI	658380	658381	+	Y65B4A.1
chrI	660276	660277	-	Y65B4A.8
chrI	661313	661314	-	Y65B4A.8
chrI	661920	661921	-	Y65B4A.8
chrI	662931	662932	-	Y65B4A.8
chrI	663014	663015	-	Y65B4A.8
chrI	663065	663066	-	Y65B4A.8
chrI	663382	663383	-	Y65B4A.8
chrI	663442	663443	-	Y65B4A.8
chrI	664500	664501	-	Y65B4A.9
chrI	664547	664548	-	Y65B4A.9
chrI	665039	665040	-	Y65B4A.9
chrI	665087	665088	-	Y65B4A.9
chrI	665187	665188	-	Y65B4A.9
chrI	665890	665891	-	Y65B4A.9
chrI	666120	666121	-	Y65B4A.9
chrI	666165	666166	-	Y65B4A.9
chrI	666282	666283	-	Y65B4A.9
chrI	666629	666630	-	Y65B4A.9
chrI	680556	680557	+	Y18H1A.11
chrI	681313	681314	+	Y18H1A.11
chrI	681430	681431	+	Y18H1A.11
chrI	681489	681490	+	Y18H1A.11
chrI	681641	681642	+	Y18H1A.11
chrI	682931	682932	+	Y18H1A.11
chrI	683153	683154	+	Y18H1A.11
chrI	683226	683227	+	Y18H1A.11
chrI	684064	684065	-	Y18H1A.10
chrI	684111	684112	-	Y18H1A.10
chrI	684229	684230	-	Y18H1A.10
chrI	685381	685382	-	Y18H1A.10
chrI	685484	685485	-	Y18H1A.10
chrI	685544	685545	-	Y18H1A.10
chrI	686409	686410	-	Y18H1A.10
chrI	686482	686483	-	Y18H1A.10
chrI	692369	692370	-	Y18H1A.4
chrI	692370	692371	-	Y18H1A.4
chrI	692596	692597	-	Y18H1A.4
chrI	692683	692684	-	Y18H1A.4
chrI	692684	692685	-	Y18H1A.4
chrI	693510	693511	-	Y18H1A.4
chrI	693846	693847	-	Y18H1A.4
chrI	693847	693848	-	Y18H1A.4
chrI	694580	694581	-	Y18H1A.4
chrI	695323	695324	-	Y18H1A.2
chrI	695324	695325	-	Y18H1A.2
chrI	696677	696678	-	Y18H1A.2
chrI	697007	697008	-	Y18H1A.2
chrI	697008	697009	-	Y18H1A.2
chrI	698052	698053	-	Y18H1A.2
chrI	700785	700786	-	Y18H1A.3
chrI	700786	700787	-	Y18H1A.3
chrI	701748	701749	-	Y18H1A.3
chrI	701755	701756	-	Y18H1A.3
chrI	701862	701863	-	Y18H1A.3
chrI	701863	701864	-	Y18H1A.3
chrI	702248	702249	-	Y18H1A.3
chrI	703984	703985	-	Y18H1A.3
chrI	703985	703986	-	Y18H1A.3
chrI	704418	704419	-	Y18H1A.3
chrI	704549	704550	-	Y18H1A.3
chrI	704550	704551	-	Y18H1A.3
chrI	706418	706419	-	Y18H1A.3
chrI	706663	706664	-	Y18H1A.3
chrI	706664	706665	-	Y18H1A.3
chrI	707945	707946	-	Y18H1A.3
chrI	708269	708270	-	Y18H1A.3
chrI	708270	708271	-	Y18H1A.3
chrI	710038	710039	-	Y18H1A.3
chrI	710264	710265	-	Y18H1A.3
chrI	710265	710266	-	Y18H1A.3
chrI	711725	711726	-	Y18H1A.3
chrI	711730	711731	-	Y18H1A.3
chrI	711994	711995	-	Y18H1A.3
chrI	711995	711996	-	Y18H1A.3
chrI	713211	713212	-	Y18H1A.3
chrI	713215	713216	-	Y18H1A.3
chrI	713647	713648	-	Y18H1A.3
chrI	713648	713649	-	Y18H1A.3
chrI	715473	715474	-	Y18H1A.3
chrI	715641	715642	-	Y18H1A.3
chrI	715642	715643	-	Y18H1A.3
chrI	715724	715725	-	Y18H1A.3
chrI	718238	718239	-	Y18H1A.7
chrI	718287	718288	-	Y18H1A.7
chrI	718364	718365	-	Y18H1A.7
chrI	718656	718657	-	Y18H1A.7
chrI	719437	719438	-	Y18H1A.7
chrI	719497	719498	-	Y18H1A.7
chrI	719601	719602	-	Y18H1A.7
chrI	719650	719651	-	Y18H1A.7
chrI	720253	720254	+	Y18H1A.6
chrI	720297	720298	+	Y18H1A.6
chrI	720432	720433	+	Y18H1A.6
chrI	720485	720486	+	Y18H1A.6
chrI	720599	720600	+	Y18H1A.6
chrI	720643	720644	+	Y18H1A.6
chrI	720784	720785	+	Y18H1A.6
chrI	720827	720828	+	Y18H1A.6
chrI	720939	720940	+	Y18H1A.6
chrI	722102	722103	+	Y18H1A.6
chrI	722201	722202	+	Y18H1A.6
chrI	722243	722244	+	Y18H1A.6
chrI	722355	722356	+	Y18H1A.6
chrI	724569	724570	+	Y18H1A.6
chrI	724766	724767	+	Y18H1A.6
chrI	725108	725109	+	Y18H1A.6
chrI	725225	725226	+	Y18H1A.6
chrI	725285	725286	+	Y18H1A.6
chrI	725392	725393	+	Y18H1A.6
chrI	725396	725397	+	Y18H1A.6
chrI	726500	726501	+	Y18H1A.6
chrI	726870	726871	+	Y18H1A.6
chrI	726874	726875	+	Y18H1A.6
chrI	730280	730281	+	Y18H1A.6
chrI	730532	730533	+	Y18H1A.6
chrI	730835	730836	+	Y18H1A.6
chrI	748592	748593	-	Y18H1A.9
chrI	749897	749898	-	Y18H1A.9
chrI	749995	749996	-	Y18H1A.9
chrI	750045	750046	-	Y18H1A.9
chrI	750167	750168	-	Y18H1A.9
chrI	750220	750221	-	Y18H1A.9
chrI	750305	750306	-	Y18H1A.9
chrI	750570	750571	-	Y18H1A.9
chrI	750845	750846	-	Y18H1A.9
chrI	752267	752268	-	Y18H1A.9
chrI	752553	752554	-	Y18H1A.9
chrI	753701	753702	-	Y18H1A.9
chrI	753842	753843	-	Y18H1A.9
chrI	754060	754061	-	Y18H1A.9
chrI	754136	754137	-	Y18H1A.9
chrI	754452	754453	-	Y18H1A.9
chrI	754589	754590	-	Y18H1A.9
chrI	754997	754998	-	Y18H1A.9
chrI	755079	755080	-	Y18H1A.9
chrI	756869	756870	-	Y18H1A.9
chrI	763824	763825	+	T06A4.3
chrI	765137	765138	+	T06A4.3
chrI	765274	765275	+	T06A4.3
chrI	765431	765432	+	T06A4.3
chrI	765645	765646	+	T06A4.3
chrI	766037	766038	+	T06A4.3
chrI	766149	766150	+	T06A4.3
chrI	766325	766326	+	T06A4.3
chrI	766445	766446	+	T06A4.3
chrI	766526	766527	+	T06A4.3
chrI	766641	766642	+	T06A4.3
chrI	767582	767583	+	T06A4.3
chrI	767734	767735	+	T06A4.3
chrI	768164	768165	+	T06A4.3
chrI	768224	768225	+	T06A4.3
chrI	768273	768274	+	T06A4.3
chrI	768448	768449	+	T06A4.3
chrI	768499	768500	+	T06A4.3
chrI	768628	768629	+	T06A4.3
chrI	770461	770462	+	T06A4.3
chrI	771058	771059	+	T06A4.1
chrI	771450	771451	+	T06A4.1
chrI	771570	771571	+	T06A4.1
chrI	771805	771806	+	T06A4.1
chrI	771911	771912	+	T06A4.1
chrI	771967	771968	+	T06A4.1
chrI	772154	772155	+	T06A4.1
chrI	773163	773164	+	T06A4.1
chrI	773385	773386	+	T06A4.1
chrI	773434	773435	+	T06A4.1
chrI	773546	773547	+	T06A4.1
chrI	773699	773700	+	T06A4.1
chrI	773987	773988	+	T06A4.1
chrI	774967	774968	+	T06A4.1
chrI	775064	775065	+	T06A4.1
chrI	775109	775110	+	T06A4.1
chrI	775572	775573	+	T06A4.1
chrI	776163	776164	+	T06A4.1
chrI	838107	838108	+	ZC123.1
chrI	838108	838109	+	ZC123.1
chrI	838154	838155	+	ZC123.1
chrI	838321	838322	+	ZC123.1
chrI	838322	838323	+	ZC123.1
chrI	838542	838543	+	ZC123.1
chrI	839126	839127	+	ZC123.1
chrI	839127	839128	+	ZC123.1
chrI	839676	839677	+	ZC123.1
chrI	840091	840092	+	ZC123.1
chrI	840092	840093	+	ZC123.1
chrI	840139	840140	+	ZC123.1
chrI	840759	840760	+	ZC123.1
chrI	840760	840761	+	ZC123.1
chrI	841217	841218	+	ZC123.1
chrI	841579	841580	+	ZC123.1
chrI	841580	841581	+	ZC123.1
chrI	841623	841624	+	ZC123.1
chrI	841740	841741	+	ZC123.1
chrI	841976	841977	-	ZC123.4
chrI	842541	842542	-	ZC123.4
chrI	842674	842675	-	ZC123.4
chrI	842716	842717	-	ZC123.4
chrI	842861	842862	-	ZC123.4
chrI	842914	842915	-	ZC123.4
chrI	843097	843098	-	ZC123.4
chrI	843712	843713	-	ZC123.4
chrI	844012	844013	-	ZC123.4
chrI	844060	844061	-	ZC123.4
chrI	844339	844340	-	ZC123.4
chrI	845613	845614	-	ZC123.4
chrI	845761	845762	-	ZC123.4
chrI	845932	845933	-	ZC123.4
chrI	845999	846000	-	ZC123.4
chrI	846082	846083	-	ZC123.4
chrI	846142	846143	-	ZC123.4
chrI	846595	846596	-	ZC123.4
chrI	876648	876649	-	Y95B8A.10
chrI	877705	877706	-	Y95B8A.10
chrI	877913	877914	-	Y95B8A.10
chrI	878216	878217	-	Y95B8A.10
chrI	878317	878318	-	Y95B8A.10
chrI	878405	878406	-	Y95B8A.10
chrI	878456	878457	-	Y95B8A.10
chrI	879482	879483	-	Y95B8A.10
chrI	879535	879536	-	Y95B8A.10
chrI	879591	879592	-	Y95B8A.10
chrI	879670	879671	-	Y95B8A.10
chrI	881108	881109	-	Y95B8A.10
chrI	881200	881201	-	Y95B8A.10
chrI	882389	882390	-	Y95B8A.10
chrI	883164	883165	+	Y95B8A.6
chrI	884645	884646	+	Y95B8A.6
chrI	884903	884904	+	Y95B8A.6
chrI	885040	885041	+	Y95B8A.6
chrI	886506	886507	+	Y95B8A.6
chrI	886707	886708	+	Y95B8A.6
chrI	887879	887880	+	Y95B8A.6
chrI	888058	888059	+	Y95B8A.6
chrI	888066	888067	+	Y95B8A.6
chrI	888149	888150	+	Y95B8A.6
chrI	888346	888347	+	Y95B8A.6
chrI	889673	889674	+	Y95B8A.6
chrI	890006	890007	+	Y95B8A.6
chrI	890109	890110	+	Y95B8A.6
chrI	890179	890180	+	Y95B8A.6
chrI	890436	890437	-	Y95B8A.11
chrI	890511	890512	-	Y95B8A.11
chrI	891321	891322	-	Y95B8A.11
chrI	891401	891402	-	Y95B8A.11
chrI	891603	891604	-	Y95B8A.11
chrI	891702	891703	-	Y95B8A.11
chrI	892176	892177	-	Y95B8A.11
chrI	892180	892181	-	Y95B8A.11
chrI	892274	892275	-	Y95B8A.11
chrI	892422	892423	-	Y95B8A.11
chrI	892426	892427	-	Y95B8A.11
chrI	892506	892507	-	Y95B8A.11
chrI	892563	892564	-	Y95B8A.11
chrI	892746	892747	-	Y95B8A.11
chrI	894501	894502	-	Y95B8A.11
chrI	894629	894630	-	Y95B8A.11
chrI	894681	894682	-	Y95B8A.11
chrI	894860	894861	-	Y95B8A.11
chrI	894923	894924	-	Y95B8A.11
chrI	907559	907560	+	Y95B8A.4
chrI	909241	909242	+	Y95B8A.4
chrI	909420	909421	+	Y95B8A.4
chrI	909679	909680	+	Y95B8A.4
chrI	909840	909841	+	Y95B8A.4
chrI	909890	909891	+	Y95B8A.4
chrI	910133	910134	+	Y95B8A.4
chrI	910940	910941	+	Y95B8A.4
chrI	938675	938676	+	Y95B8A.2
chrI	940220	940221	+	Y95B8A.2
chrI	940307	940308	+	Y95B8A.2
chrI	940511	940512	+	Y95B8A.2
chrI	940583	940584	+	Y95B8A.2
chrI	941231	941232	+	Y95B8A.2
chrI	941361	941362	+	Y95B8A.2
chrI	943665	943666	+	Y95B8A.1
chrI	943973	943974	+	Y95B8A.1
chrI	944026	944027	+	Y95B8A.1
chrI	944182	944183	+	Y95B8A.1
chrI	944229	944230	+	Y95B8A.1
chrI	944342	944343	+	Y95B8A.1
chrI	945229	945230	+	Y95B8A.1
chrI	945463	945464	+	Y95B8A.1
chrI	945511	945512	+	Y95B8A.1
chrI	945834	945835	+	Y95B8A.1
chrI	945886	945887	+	Y95B8A.1
chrI	946013	946014	+	Y95B8A.1
chrI	946219	946220	+	Y95B8A.1
chrI	946348	946349	+	Y95B8A.1
chrI	946397	946398	+	Y95B8A.1
chrI	946608	946609	+	Y95B8A.1
chrI	947156	947157	+	Y95B8A.1
chrI	947266	947267	+	Y95B8A.1
chrI	947316	947317	+	Y95B8A.1
chrI	948790	948791	-	Y34D9B.1
chrI	948791	948792	-	Y34D9B.1
chrI	949041	949042	-	Y34D9B.1
chrI	949045	949046	-	Y34D9B.1
chrI	949499	949500	-	Y34D9B.1
chrI	949500	949501	-	Y34D9B.1
chrI	949773	949774	-	Y34D9B.1
chrI	949949	949950	-	Y34D9B.1
chrI	949950	949951	-	Y34D9B.1
chrI	950846	950847	-	Y34D9B.1
chrI	950954	950955	-	Y34D9B.1
chrI	950955	950956	-	Y34D9B.1
chrI	950966	950967	-	Y34D9B.1
chrI	950967	950968	-	Y34D9B.1
chrI	951018	951019	-	Y34D9B.1
chrI	951109	951110	-	Y34D9B.1
chrI	951110	951111	-	Y34D9B.1
chrI	951174	951175	-	Y34D9B.1
chrI	951314	951315	-	Y34D9B.1
chrI	951315	951316	-	Y34D9B.1
chrI	952676	952677	-	Y34D9B.1
chrI	952888	952889	-	Y34D9B.1
chrI	952889	952890	-	Y34D9B.1
chrI	952950	952951	-	Y34D9B.1
chrI	953091	953092	-	Y34D9B.1
chrI	953092	953093	-	Y34D9B.1
chrI	957191	957192	-	Y34D9B.1
chrI	964052	964053	-	F54A5.2
chrI	964113	964114	-	F54A5.2
chrI	964196	964197	-	F54A5.2
chrI	966475	966476	-	F54A5.2
chrI	966598	966599	-	F54A5.2
chrI	966646	966647	-	F54A5.2
chrI	966733	966734	-	F54A5.2
chrI	966778	966779	-	F54A5.2
chrI	966923	966924	-	F54A5.2
chrI	968234	968235	-	F54A5.2
chrI	968317	968318	-	F54A5.2
chrI	968362	968363	-	F54A5.2
chrI	968488	968489	-	F54A5.2
chrI	969236	969237	-	F54A5.3
chrI	969837	969838	-	F54A5.3
chrI	969838	969839	-	F54A5.3
chrI	969892	969893	-	F54A5.3
chrI	969982	969983	-	F54A5.3
chrI	969983	969984	-	F54A5.3
chrI	971459	971460	-	F54A5.3
chrI	971949	971950	-	F54A5.3
chrI	971950	971951	-	F54A5.3
chrI	972085	972086	-	F54A5.3
chrI	972086	972087	-	F54A5.3
chrI	972647	972648	-	F54A5.3
chrI	972719	972720	-	F54A5.3
chrI	972720	972721	-	F54A5.3
chrI	972866	972867	-	F54A5.3
chrI	972936	972937	-	F54A5.3
chrI	972937	972938	-	F54A5.3
chrI	972986	972987	-	F54A5.3
chrI	990141	990142	+	F54A5.1
chrI	990142	990143	+	F54A5.1
chrI	990520	990521	+	F54A5.1
chrI	991037	991038	+	F54A5.1
chrI	991038	991039	+	F54A5.1
chrI	991495	991496	+	F54A5.1
chrI	1011654	1011655	-	C54G6.1
chrI	1011696	1011697	-	C54G6.1
chrI	1011852	1011853	-	C54G6.1
chrI	1013666	1013667	-	C54G6.1
chrI	1014025	1014026	-	C54G6.1
chrI	1014080	1014081	-	C54G6.1
chrI	1014206	1014207	-	C54G6.1
chrI	1014262	1014263	-	C54G6.1
chrI	1016523	1016524	+	C54G6.5
chrI	1016524	1016525	+	C54G6.5
chrI	1016931	1016932	+	C54G6.5
chrI	1020033	1020034	-	Y34D9A.1
chrI	1020034	1020035	-	Y34D9A.1
chrI	1023902	1023903	-	Y34D9A.1
chrI	1024214	1024215	-	Y34D9A.1
chrI	1024215	1024216	-	Y34D9A.1
chrI	1026166	1026167	-	Y34D9A.1
chrI	1026616	1026617	-	Y34D9A.1
chrI	1026617	1026618	-	Y34D9A.1
chrI	1026692	1026693	-	Y34D9A.1
chrI	1029492	1029493	-	Y34D9A.1
chrI	1029602	1029603	-	Y34D9A.1
chrI	1029603	1029604	-	Y34D9A.1
chrI	1029661	1029662	-	Y34D9A.1
chrI	1031003	1031004	-	Y34D9A.4
chrI	1031082	1031083	-	Y34D9A.4
chrI	1031083	1031084	-	Y34D9A.4
chrI	1031095	1031096	-	Y34D9A.4
chrI	1031977	1031978	-	Y34D9A.4
chrI	1031990	1031991	-	Y34D9A.4
chrI	1031994	1031995	-	Y34D9A.4
chrI	1032872	1032873	-	Y34D9A.4
chrI	1032873	1032874	-	Y34D9A.4
chrI	1032927	1032928	-	Y34D9A.4
chrI	1033211	1033212	-	Y34D9A.4
chrI	1033212	1033213	-	Y34D9A.4
chrI	1033218	1033219	-	Y34D9A.4
chrI	1033264	1033265	-	Y34D9A.4
chrI	1034496	1034497	+	Y34D9A.3
chrI	1034497	1034498	+	Y34D9A.3
chrI	1034546	1034547	+	Y34D9A.3
chrI	1034643	1034644	+	Y34D9A.3
chrI	1034644	1034645	+	Y34D9A.3
chrI	1034690	1034691	+	Y34D9A.3
chrI	1034878	1034879	+	Y34D9A.3
chrI	1034879	1034880	+	Y34D9A.3
chrI	1034931	1034932	+	Y34D9A.3
chrI	1035062	1035063	+	Y34D9A.3
chrI	1035063	1035064	+	Y34D9A.3
chrI	1035067	1035068	+	Y34D9A.3
chrI	1035120	1035121	+	Y34D9A.3
chrI	1035243	1035244	+	Y34D9A.3
chrI	1035244	1035245	+	Y34D9A.3
chrI	1035303	1035304	+	Y34D9A.3
chrI	1035395	1035396	+	Y34D9A.3
chrI	1035396	1035397	+	Y34D9A.3
chrI	1037311	1037312	+	Y34D9A.3
chrI	1037450	1037451	+	Y34D9A.3
chrI	1037451	1037452	+	Y34D9A.3
chrI	1037491	1037492	+	Y34D9A.3
chrI	1037505	1037506	+	Y34D9A.3
chrI	1037712	1037713	+	Y34D9A.3
chrI	1037713	1037714	+	Y34D9A.3
chrI	1039052	1039053	+	Y34D9A.3
chrI	1039171	1039172	+	Y34D9A.3
chrI	1039172	1039173	+	Y34D9A.3
chrI	1039214	1039215	+	Y34D9A.3
chrI	1039223	1039224	+	Y34D9A.3
chrI	1039293	1039294	+	Y34D9A.3
chrI	1039294	1039295	+	Y34D9A.3
chrI	1039337	1039338	+	Y34D9A.3
chrI	1039880	1039881	+	Y34D9A.3
chrI	1039881	1039882	+	Y34D9A.3
chrI	1040113	1040114	+	Y34D9A.3
chrI	1040645	1040646	+	Y34D9A.3
chrI	1040646	1040647	+	Y34D9A.3
chrI	1040697	1040698	+	Y34D9A.3
chrI	1042052	1042053	+	Y34D9A.7
chrI	1042103	1042104	+	Y34D9A.7
chrI	1042106	1042107	+	Y34D9A.7
chrI	1042118	1042119	+	Y34D9A.7
chrI	1042123	1042124	+	Y34D9A.7
chrI	1042124	1042125	+	Y34D9A.7
chrI	1049685	1049686	+	Y34D9A.6
chrI	1049686	1049687	+	Y34D9A.6
chrI	1050404	1050405	+	Y34D9A.6
chrI	1051129	1051130	-	Y34D9A.8
chrI	1051915	1051916	-	Y34D9A.8
chrI	1052025	1052026	-	Y34D9A.8
chrI	1052568	1052569	-	Y34D9A.8
chrI	1052677	1052678	-	Y34D9A.8
chrI	1052793	1052794	-	Y34D9A.8
chrI	1052854	1052855	-	Y34D9A.8
chrI	1053393	1053394	-	Y34D9A.8
chrI	1053431	1053432	-	Y34D9A.8
chrI	1053594	1053595	-	Y34D9A.8
chrI	1054469	1054470	-	Y34D9A.10
chrI	1056060	1056061	-	Y34D9A.10
chrI	1056205	1056206	-	Y34D9A.10
chrI	1057693	1057694	-	Y34D9A.10
chrI	1057912	1057913	-	Y34D9A.10
chrI	1059379	1059380	-	Y34D9A.10
chrI	1059543	1059544	-	Y34D9A.10
chrI	1060449	1060450	-	Y34D9A.10
chrI	1060670	1060671	-	Y34D9A.10
chrI	1066192	1066193	-	Y34D9A.10
chrI	1066325	1066326	-	Y34D9A.10
chrI	1066391	1066392	-	Y34D9A.10
chrI	1066561	1066562	-	Y34D9A.10
chrI	1066656	1066657	-	Y34D9A.10
chrI	1066768	1066769	-	Y34D9A.10
chrI	1066848	1066849	-	Y34D9A.10
chrI	1086204	1086205	+	R06A10.1
chrI	1087249	1087250	+	R06A10.1
chrI	1087385	1087386	+	R06A10.1
chrI	1087449	1087450	+	R06A10.1
chrI	1087525	1087526	+	R06A10.1
chrI	1088384	1088385	+	R06A10.1
chrI	1090202	1090203	-	R06A10.4
chrI	1090442	1090443	-	R06A10.4
chrI	1090622	1090623	-	R06A10.4
chrI	1091328	1091329	-	R06A10.4
chrI	1091454	1091455	-	R06A10.4
chrI	1091506	1091507	-	R06A10.4
chrI	1091682	1091683	-	R06A10.4
chrI	1092669	1092670	-	R06A10.4
chrI	1092841	1092842	-	R06A10.4
chrI	1094302	1094303	-	R06A10.4
chrI	1094567	1094568	-	R06A10.4
chrI	1095667	1095668	-	R06A10.4
chrI	1128426	1128427	+	ZK993.1
chrI	1129209	1129210	+	ZK993.1
chrI	1129394	1129395	+	ZK993.1
chrI	1129404	1129405	+	ZK993.1
chrI	1129805	1129806	+	ZK993.1
chrI	1130014	1130015	+	ZK993.1
chrI	1131221	1131222	+	ZK993.1
chrI	1131287	1131288	+	ZK993.1
chrI	1131472	1131473	+	ZK993.1
chrI	1136742	1136743	-	Y48G8AL.10
chrI	1137811	1137812	-	Y48G8AL.10
chrI	1138141	1138142	-	Y48G8AL.10
chrI	1140153	1140154	-	Y48G8AL.10
chrI	1140268	1140269	-	Y48G8AL.10
chrI	1140802	1140803	-	Y48G8AL.10
chrI	1141031	1141032	-	Y48G8AL.10
chrI	1142084	1142085	-	Y48G8AL.10
chrI	1142298	1142299	-	Y48G8AL.10
chrI	1143349	1143350	-	Y48G8AL.10
chrI	1143539	1143540	-	Y48G8AL.10
chrI	1145714	1145715	-	Y48G8AL.10
chrI	1145855	1145856	-	Y48G8AL.10
chrI	1147086	1147087	-	Y48G8AL.10
chrI	1147585	1147586	-	Y48G8AL.10
chrI	1149905	1149906	-	Y48G8AL.10
chrI	1150596	1150597	-	Y48G8AL.10
chrI	1150693	1150694	-	Y48G8AL.10
chrI	1152122	1152123	-	Y48G8AL.10
chrI	1152280	1152281	-	Y48G8AL.10
chrI	1152633	1152634	-	Y48G8AL.10
chrI	1152812	1152813	-	Y48G8AL.10
chrI	1152877	1152878	-	Y48G8AL.10
chrI	1153008	1153009	-	Y48G8AL.10
chrI	1153718	1153719	-	Y48G8AL.10
chrI	1153747	1153748	-	Y48G8AL.10
chrI	1155706	1155707	-	Y48G8AL.14
chrI	1155707	1155708	-	Y48G8AL.14
chrI	1155747	1155748	-	Y48G8AL.14
chrI	1156581	1156582	+	Y48G8AL.8
chrI	1156866	1156867	+	Y48G8AL.8
chrI	1156878	1156879	+	Y48G8AL.8
chrI	1156888	1156889	+	Y48G8AL.8
chrI	1156889	1156890	+	Y48G8AL.8
chrI	1156893	1156894	+	Y48G8AL.8
chrI	1156894	1156895	+	Y48G8AL.8
chrI	1156902	1156903	+	Y48G8AL.8
chrI	1156957	1156958	+	Y48G8AL.8
chrI	1156961	1156962	+	Y48G8AL.8
chrI	1156970	1156971	+	Y48G8AL.8
chrI	1156979	1156980	+	Y48G8AL.8
chrI	1156980	1156981	+	Y48G8AL.8
chrI	1156995	1156996	+	Y48G8AL.8
chrI	1157074	1157075	+	Y48G8AL.8
chrI	1157094	1157095	+	Y48G8AL.8
chrI	1157095	1157096	+	Y48G8AL.8
chrI	1157099	1157100	+	Y48G8AL.8
chrI	1157112	1157113	+	Y48G8AL.8
chrI	1157135	1157136	+	Y48G8AL.8
chrI	1157273	1157274	+	Y48G8AL.8
chrI	1157287	1157288	+	Y48G8AL.8
chrI	1157295	1157296	+	Y48G8AL.8
chrI	1157296	1157297	+	Y48G8AL.8
chrI	1157302	1157303	+	Y48G8AL.8
chrI	1157398	1157399	+	Y48G8AL.8
chrI	1157456	1157457	+	Y48G8AL.8
chrI	1157465	1157466	+	Y48G8AL.8
chrI	1158031	1158032	+	Y48G8AL.7
chrI	1158032	1158033	+	Y48G8AL.7
chrI	1159840	1159841	+	Y48G8AL.7
chrI	1162616	1162617	+	Y48G8AL.7
chrI	1162883	1162884	+	Y48G8AL.7
chrI	1163041	1163042	-	Y48G8AL.11
chrI	1163150	1163151	-	Y48G8AL.11
chrI	1163160	1163161	-	Y48G8AL.11
chrI	1163649	1163650	-	Y48G8AL.11
chrI	1163721	1163722	-	Y48G8AL.11
chrI	1164188	1164189	-	Y48G8AL.11
chrI	1164508	1164509	-	Y48G8AL.11
chrI	1164725	1164726	-	Y48G8AL.11
chrI	1164768	1164769	-	Y48G8AL.11
chrI	1164796	1164797	-	Y48G8AL.11
chrI	1164852	1164853	-	Y48G8AL.11
chrI	1164856	1164857	-	Y48G8AL.11
chrI	1164857	1164858	-	Y48G8AL.11
chrI	1164883	1164884	-	Y48G8AL.11
chrI	1166225	1166226	-	Y48G8AL.11
chrI	1166324	1166325	-	Y48G8AL.11
chrI	1166377	1166378	-	Y48G8AL.11
chrI	1166582	1166583	-	Y48G8AL.11
chrI	1167651	1167652	-	Y48G8AL.11
chrI	1167975	1167976	-	Y48G8AL.11
chrI	1169556	1169557	-	Y48G8AL.11
chrI	1169799	1169800	-	Y48G8AL.11
chrI	1170669	1170670	-	Y48G8AL.11
chrI	1170895	1170896	-	Y48G8AL.11
chrI	1172269	1172270	-	Y48G8AL.11
chrI	1172281	1172282	-	Y48G8AL.11
chrI	1173807	1173808	-	Y48G8AL.11
chrI	1174094	1174095	-	Y48G8AL.11
chrI	1174106	1174107	-	Y48G8AL.11
chrI	1175383	1175384	-	Y48G8AL.11
chrI	1175626	1175627	-	Y48G8AL.11
chrI	1175688	1175689	-	Y48G8AL.11
chrI	1176620	1176621	+	Y48G8AL.6
chrI	1177877	1177878	+	Y48G8AL.6
chrI	1178418	1178419	+	Y48G8AL.6
chrI	1178423	1178424	+	Y48G8AL.6
chrI	1179002	1179003	+	Y48G8AL.6
chrI	1179013	1179014	+	Y48G8AL.6
chrI	1179390	1179391	+	Y48G8AL.6
chrI	1179391	1179392	+	Y48G8AL.6
chrI	1180246	1180247	+	Y48G8AL.6
chrI	1181186	1181187	+	Y48G8AL.6
chrI	1181187	1181188	+	Y48G8AL.6
chrI	1182418	1182419	+	Y48G8AL.6
chrI	1182502	1182503	+	Y48G8AL.6
chrI	1182503	1182504	+	Y48G8AL.6
chrI	1182871	1182872	+	Y48G8AL.6
chrI	1183178	1183179	+	Y48G8AL.6
chrI	1183179	1183180	+	Y48G8AL.6
chrI	1183548	1183549	+	Y48G8AL.6
chrI	1183590	1183591	+	Y48G8AL.6
chrI	1183591	1183592	+	Y48G8AL.6
chrI	1183592	1183593	+	Y48G8AL.6
chrI	1183603	1183604	+	Y48G8AL.6
chrI	1183609	1183610	+	Y48G8AL.6
chrI	1183611	1183612	+	Y48G8AL.6
chrI	1183644	1183645	+	Y48G8AL.6
chrI	1184850	1184851	+	Y48G8AL.6
chrI	1185134	1185135	+	Y48G8AL.6
chrI	1185135	1185136	+	Y48G8AL.6
chrI	1187289	1187290	+	Y48G8AL.6
chrI	1187502	1187503	+	Y48G8AL.6
chrI	1187503	1187504	+	Y48G8AL.6
chrI	1189067	1189068	+	Y48G8AL.6
chrI	1189641	1189642	+	Y48G8AL.6
chrI	1190072	1190073	-	Y48G8AL.20
chrI	1193441	1193442	+	Y48G8AL.5
chrI	1193442	1193443	+	Y48G8AL.5
chrI	1194159	1194160	+	Y48G8AL.5
chrI	1195742	1195743	+	Y48G8AL.5
chrI	1195928	1195929	+	Y48G8AL.5
chrI	1196091	1196092	+	Y48G8AL.5
chrI	1196092	1196093	+	Y48G8AL.5
chrI	1196726	1196727	+	Y48G8AL.5
chrI	1198543	1198544	+	Y48G8AL.5
chrI	1199140	1199141	+	Y48G8AL.5
chrI	1199141	1199142	+	Y48G8AL.5
chrI	1199145	1199146	+	Y48G8AL.5
chrI	1201877	1201878	+	Y48G8AL.5
chrI	1202059	1202060	+	Y48G8AL.5
chrI	1202060	1202061	+	Y48G8AL.5
chrI	1207321	1207322	+	Y48G8AL.5
chrI	1207735	1207736	+	Y48G8AL.5
chrI	1207736	1207737	+	Y48G8AL.5
chrI	1208574	1208575	+	Y48G8AL.5
chrI	1208693	1208694	+	Y48G8AL.5
chrI	1208694	1208695	+	Y48G8AL.5
chrI	1210861	1210862	+	Y48G8AL.5
chrI	1211588	1211589	+	Y48G8AL.1
chrI	1212573	1212574	+	Y48G8AL.1
chrI	1212773	1212774	+	Y48G8AL.1
chrI	1213786	1213787	+	Y48G8AL.1
chrI	1213979	1213980	+	Y48G8AL.1
chrI	1218656	1218657	-	Y48G8AL.12
chrI	1218884	1218885	-	Y48G8AL.12
chrI	1221046	1221047	+	Y48G8AL.1
chrI	1221244	1221245	+	Y48G8AL.1
chrI	1222676	1222677	+	Y48G8AL.1
chrI	1222827	1222828	+	Y48G8AL.1
chrI	1224333	1224334	-	Y48G8AL.13
chrI	1224334	1224335	-	Y48G8AL.13
chrI	1224654	1224655	-	Y48G8AL.13
chrI	1224777	1224778	-	Y48G8AL.13
chrI	1224778	1224779	-	Y48G8AL.13
chrI	1225175	1225176	-	Y48G8AL.13
chrI	1225504	1225505	-	Y48G8AL.13
chrI	1225534	1225535	-	Y48G8AL.13
chrI	1225535	1225536	-	Y48G8AL.13
chrI	1226619	1226620	-	Y48G8AL.13
chrI	1226812	1226813	-	Y48G8AL.13
chrI	1227744	1227745	-	Y48G8AL.13
chrI	1232372	1232373	+	Y48G8AL.1
chrI	1232634	1232635	+	Y48G8AL.1
chrI	1233776	1233777	+	Y48G8AL.1
chrI	1233883	1233884	+	Y48G8AL.1
chrI	1234492	1234493	+	Y48G8AL.1
chrI	1234673	1234674	+	Y48G8AL.1
chrI	1236162	1236163	+	Y48G8AL.1
chrI	1236358	1236359	+	Y48G8AL.1
chrI	1237953	1237954	+	Y48G8AL.1
chrI	1238105	1238106	+	Y48G8AL.1
chrI	1239438	1239439	+	Y48G8AL.1
chrI	1239639	1239640	+	Y48G8AL.1
chrI	1241099	1241100	+	Y48G8AL.1
chrI	1241255	1241256	+	Y48G8AL.1
chrI	1242768	1242769	+	Y48G8AL.1
chrI	1242857	1242858	+	Y48G8AL.1
chrI	1245226	1245227	+	Y48G8AL.1
chrI	1245392	1245393	+	Y48G8AL.1
chrI	1247362	1247363	+	Y48G8AL.1
chrI	1247590	1247591	+	Y48G8AL.1
chrI	1247778	1247779	+	Y48G8AL.1
chrI	1247958	1247959	+	Y48G8AL.1
chrI	1253332	1253333	+	Y48G8AL.1
chrI	1253515	1253516	+	Y48G8AL.1
chrI	1254376	1254377	+	Y48G8AL.1
chrI	1259671	1259672	-	Y48G8AR.1
chrI	1262347	1262348	-	Y48G8AR.1
chrI	1262351	1262352	-	Y48G8AR.1
chrI	1262470	1262471	-	Y48G8AR.1
chrI	1262926	1262927	-	Y48G8AR.1
chrI	1263154	1263155	-	Y48G8AR.1
chrI	1263962	1263963	-	Y48G8AR.1
chrI	1264020	1264021	-	Y48G8AR.1
chrI	1264756	1264757	-	Y48G8AR.1
chrI	1264912	1264913	-	Y48G8AR.1
chrI	1265421	1265422	-	Y48G8AR.1
chrI	1265631	1265632	-	Y48G8AR.1
chrI	1266269	1266270	-	Y48G8AR.1
chrI	1282231	1282232	+	Y48G8AR.2
chrI	1282697	1282698	+	Y48G8AR.2
chrI	1282820	1282821	+	Y48G8AR.2
chrI	1283724	1283725	+	Y48G8AR.2
chrI	1283830	1283831	+	Y48G8AR.2
chrI	1283900	1283901	+	Y48G8AR.2
chrI	1283992	1283993	+	Y48G8AR.2
chrI	1284143	1284144	+	Y48G8AR.2
chrI	1284283	1284284	+	Y48G8AR.2
chrI	1284577	1284578	+	Y48G8AR.2
chrI	1284757	1284758	+	Y48G8AR.2
chrI	1284803	1284804	+	Y48G8AR.2
chrI	1284864	1284865	+	Y48G8AR.2
chrI	1284906	1284907	+	Y48G8AR.2
chrI	1284976	1284977	+	Y48G8AR.2
chrI	1285163	1285164	+	Y48G8AR.2
chrI	1337116	1337117	+	K12C11.6
chrI	1337254	1337255	+	K12C11.6
chrI	1337372	1337373	+	K12C11.6
chrI	1337936	1337937	+	K12C11.6
chrI	1338995	1338996	+	K12C11.7
chrI	1339275	1339276	+	K12C11.7
chrI	1339370	1339371	+	K12C11.7
chrI	1339429	1339430	+	K12C11.7
chrI	1339566	1339567	+	K12C11.7
chrI	1339630	1339631	+	K12C11.7
chrI	1340763	1340764	+	K12C11.2
chrI	1340768	1340769	+	K12C11.2
chrI	1340772	1340773	+	K12C11.2
chrI	1340820	1340821	+	K12C11.2
chrI	1340821	1340822	+	K12C11.2
chrI	1340824	1340825	+	K12C11.2
chrI	1340828	1340829	+	K12C11.2
chrI	1340925	1340926	+	K12C11.2
chrI	1340975	1340976	+	K12C11.2
chrI	1341246	1341247	+	K12C11.2
chrI	1341265	1341266	-	K12C11.1
chrI	1341271	1341272	-	K12C11.1
chrI	1341280	1341281	-	K12C11.1
chrI	1341307	1341308	-	K12C11.1
chrI	1341635	1341636	-	K12C11.1
chrI	1341636	1341637	-	K12C11.1
chrI	1341929	1341930	-	K12C11.1
chrI	1342171	1342172	-	K12C11.1
chrI	1342725	1342726	-	K12C11.1
chrI	1342726	1342727	-	K12C11.1
chrI	1343447	1343448	-	K12C11.1
chrI	1343451	1343452	-	K12C11.1
chrI	1344032	1344033	-	K12C11.1
chrI	1348740	1348741	+	Y92H12BL.1
chrI	1350805	1350806	+	Y92H12BL.1
chrI	1351174	1351175	+	Y92H12BL.1
chrI	1354194	1354195	+	Y92H12BL.1
chrI	1354340	1354341	+	Y92H12BL.1
chrI	1356081	1356082	+	Y92H12BL.1
chrI	1356371	1356372	+	Y92H12BL.1
chrI	1358066	1358067	+	Y92H12BL.1
chrI	1383284	1383285	-	Y92H12BL.4
chrI	1388021	1388022	-	Y92H12BM.1
chrI	1388121	1388122	-	Y92H12BM.1
chrI	1406371	1406372	+	Y92H12BR.6
chrI	1406375	1406376	+	Y92H12BR.6
chrI	1408456	1408457	+	Y92H12BR.6
chrI	1408635	1408636	+	Y92H12BR.6
chrI	1408636	1408637	+	Y92H12BR.6
chrI	1411440	1411441	+	Y92H12BR.6
chrI	1411614	1411615	+	Y92H12BR.6
chrI	1411615	1411616	+	Y92H12BR.6
chrI	1412610	1412611	+	Y92H12BR.6
chrI	1414238	1414239	-	Y92H12BR.2
chrI	1414239	1414240	-	Y92H12BR.2
chrI	1415237	1415238	-	Y92H12BR.2
chrI	1415348	1415349	-	Y92H12BR.2
chrI	1415349	1415350	-	Y92H12BR.2
chrI	1415399	1415400	-	Y92H12BR.2
chrI	1415486	1415487	-	Y92H12BR.2
chrI	1415487	1415488	-	Y92H12BR.2
chrI	1415552	1415553	-	Y92H12BR.2
chrI	1415645	1415646	-	Y92H12BR.2
chrI	1415646	1415647	-	Y92H12BR.2
chrI	1415725	1415726	-	Y92H12BR.2
chrI	1416736	1416737	+	Y92H12BR.3
chrI	1416737	1416738	+	Y92H12BR.3
chrI	1416794	1416795	+	Y92H12BR.3
chrI	1416959	1416960	+	Y92H12BR.3
chrI	1416960	1416961	+	Y92H12BR.3
chrI	1416964	1416965	+	Y92H12BR.3
chrI	1420210	1420211	+	Y92H12BR.3
chrI	1421308	1421309	+	Y92H12BR.3
chrI	1422687	1422688	+	Y92H12BR.3
chrI	1422991	1422992	+	Y92H12BR.3
chrI	1422992	1422993	+	Y92H12BR.3
chrI	1424410	1424411	+	Y92H12BR.3
chrI	1436428	1436429	+	Y92H12BR.8
chrI	1436429	1436430	+	Y92H12BR.8
chrI	1437378	1437379	+	Y92H12BR.8
chrI	1437502	1437503	+	Y92H12BR.8
chrI	1437503	1437504	+	Y92H12BR.8
chrI	1440580	1440581	+	Y92H12BR.8
chrI	1442654	1442655	-	F37F2.2
chrI	1442655	1442656	-	F37F2.2
chrI	1443595	1443596	-	F37F2.2
chrI	1443775	1443776	-	F37F2.2
chrI	1443776	1443777	-	F37F2.2
chrI	1443825	1443826	-	F37F2.2
chrI	1446569	1446570	+	F47G6.4
chrI	1446653	1446654	+	F47G6.4
chrI	1446947	1446948	+	F47G6.4
chrI	1447262	1447263	+	F47G6.4
chrI	1447557	1447558	+	F47G6.4
chrI	1447909	1447910	+	F47G6.4
chrI	1448007	1448008	+	F47G6.4
chrI	1448084	1448085	+	F47G6.4
chrI	1448249	1448250	+	F47G6.4
chrI	1449234	1449235	+	F47G6.4
chrI	1450250	1450251	+	F47G6.4
chrI	1454244	1454245	+	F47G6.4
chrI	1454380	1454381	+	F47G6.4
chrI	1454429	1454430	+	F47G6.4
chrI	1454750	1454751	+	F47G6.4
chrI	1454799	1454800	+	F47G6.4
chrI	1454911	1454912	+	F47G6.4
chrI	1455673	1455674	+	F47G6.4
chrI	1455764	1455765	+	F47G6.4
chrI	1460228	1460229	+	F47G6.4
chrI	1460286	1460287	+	F47G6.4
chrI	1460544	1460545	+	F47G6.4
chrI	1460729	1460730	+	F47G6.4
chrI	1461514	1461515	+	F47G6.4
chrI	1461628	1461629	+	F47G6.4
chrI	1461672	1461673	+	F47G6.4
chrI	1461959	1461960	+	F47G6.4
chrI	1463566	1463567	+	F47G6.4
chrI	1463698	1463699	+	F47G6.4
chrI	1463931	1463932	+	F47G6.4
chrI	1464051	1464052	+	F47G6.4
chrI	1464366	1464367	+	F47G6.4
chrI	1464471	1464472	+	F47G6.4
chrI	1465071	1465072	+	F47G6.4
chrI	1471374	1471375	+	F47G6.2
chrI	1475544	1475545	+	F47G6.2
chrI	1475778	1475779	+	F47G6.2
chrI	1476366	1476367	+	F47G6.2
chrI	1476468	1476469	+	F47G6.2
chrI	1476638	1476639	+	F47G6.2
chrI	1476814	1476815	+	F47G6.2
chrI	1476971	1476972	+	F47G6.2
chrI	1477086	1477087	+	F47G6.2
chrI	1477134	1477135	+	F47G6.2
chrI	1477230	1477231	+	F47G6.2
chrI	1477828	1477829	+	F47G6.2
chrI	1478146	1478147	+	F47G6.2
chrI	1478754	1478755	+	F47G6.2
chrI	1478996	1478997	+	F47G6.2
chrI	1479210	1479211	+	F47G6.2
chrI	1479469	1479470	+	F47G6.2
chrI	1479746	1479747	+	F47G6.2
chrI	1483235	1483236	+	F47G6.1
chrI	1484718	1484719	+	F47G6.1
chrI	1484876	1484877	+	F47G6.1
chrI	1484922	1484923	+	F47G6.1
chrI	1485059	1485060	+	F47G6.1
chrI	1485925	1485926	+	F47G6.1
chrI	1486011	1486012	+	F47G6.1
chrI	1486055	1486056	+	F47G6.1
chrI	1486251	1486252	+	F47G6.1
chrI	1487178	1487179	+	F47G6.1
chrI	1487410	1487411	+	F47G6.1
chrI	1487768	1487769	+	F47G6.1
chrI	1488095	1488096	+	F47G6.1
chrI	1488423	1488424	+	F47G6.1
chrI	1488675	1488676	+	F47G6.1
chrI	1489067	1489068	+	F47G6.1
chrI	1489281	1489282	+	F47G6.1
chrI	1490280	1490281	+	F47G6.1
chrI	1552112	1552113	+	Y92H12A.2
chrI	1552702	1552703	+	Y92H12A.2
chrI	1552848	1552849	+	Y92H12A.2
chrI	1553515	1553516	+	Y92H12A.2
chrI	1553951	1553952	+	Y92H12A.2
chrI	1554796	1554797	+	Y92H12A.2
chrI	1555122	1555123	+	Y92H12A.2
chrI	1555786	1555787	+	Y92H12A.2
chrI	1567019	1567020	+	Y92H12A.1
chrI	1567600	1567601	+	Y92H12A.1
chrI	1567685	1567686	+	Y92H12A.1
chrI	1570348	1570349	+	Y92H12A.1
chrI	1570681	1570682	+	Y92H12A.1
chrI	1571932	1571933	+	Y92H12A.1
chrI	1572084	1572085	+	Y92H12A.1
chrI	1574142	1574143	+	Y92H12A.1
chrI	1574491	1574492	+	Y92H12A.1
chrI	1577386	1577387	+	Y92H12A.1
chrI	1577868	1577869	+	Y92H12A.1
chrI	1579071	1579072	+	Y92H12A.1
chrI	1584344	1584345	+	Y73E7A.3
chrI	1585270	1585271	+	Y73E7A.3
chrI	1585413	1585414	+	Y73E7A.3
chrI	1586166	1586167	+	Y73E7A.3
chrI	1586339	1586340	+	Y73E7A.3
chrI	1588451	1588452	+	Y73E7A.3
chrI	1588636	1588637	+	Y73E7A.3
chrI	1588743	1588744	+	Y73E7A.3
chrI	1589457	1589458	+	Y73E7A.3
chrI	1589651	1589652	+	Y73E7A.3
chrI	1589714	1589715	+	Y73E7A.3
chrI	1589799	1589800	+	Y73E7A.3
chrI	1590699	1590700	+	Y73E7A.3
chrI	1590934	1590935	+	Y73E7A.3
chrI	1591004	1591005	+	Y73E7A.3
chrI	1592087	1592088	+	Y73E7A.3
chrI	1592295	1592296	+	Y73E7A.3
chrI	1592347	1592348	+	Y73E7A.3
chrI	1592422	1592423	+	Y73E7A.3
chrI	1592515	1592516	+	Y73E7A.3
chrI	1592623	1592624	+	Y73E7A.3
chrI	1593348	1593349	+	Y73E7A.3
chrI	1595137	1595138	-	Y73E7A.4
chrI	1595901	1595902	-	Y73E7A.4
chrI	1601917	1601918	+	Y73E7A.2
chrI	1601964	1601965	+	Y73E7A.2
chrI	1602317	1602318	+	Y73E7A.2
chrI	1602318	1602319	+	Y73E7A.2
chrI	1604480	1604481	+	Y73E7A.2
chrI	1605042	1605043	+	Y73E7A.2
chrI	1605043	1605044	+	Y73E7A.2
chrI	1606376	1606377	+	Y73E7A.2
chrI	1608062	1608063	-	Y73E7A.6
chrI	1609911	1609912	-	Y73E7A.6
chrI	1629116	1629117	+	Y73E7A.1
chrI	1629117	1629118	+	Y73E7A.1
chrI	1629162	1629163	+	Y73E7A.1
chrI	1629223	1629224	+	Y73E7A.1
chrI	1629224	1629225	+	Y73E7A.1
chrI	1629225	1629226	+	Y73E7A.1
chrI	1629279	1629280	+	Y73E7A.1
[truncated: 163,991 more rows]
