# Supplementary material for: Direct full-length RNA sequencing reveals unexpected transcriptome complexity during Caenorhabditis elegans development
Source: HighWire-hosted journal article supplement (doi:10.1101/gr.251512.119), 2020-02-01
Supplement: Supplemental_Table_S3.xlsx [file Supplemental_Table_S3.xlsx]

## Sheet: New_isoforms
Table S3. List of new isoforms and their expression output by TrackCluster pipeline
			At isoform level				At gene level			Ratio of the isoform within the locus					Relative to the nearest existing isoform
Isoform name	Gene name	Accumulated coverage at isoform level	EMB coverage	L1 coverage	YA coverage	Accumulated coverage at gene level	EMB coverage	L1 coverage	YA coverage	EMB_ratio	L1_ratio	YA_ratio	category	Nearest_existing_isoform	Description (missing)	Description(extra)	Read name
2L52.1_NP1	2L52.1	5.30688	3.03251	1.51625	0.758126	15.9207	9.78672	3.44603	2.6879	0.190476	0.15493	0.22	5'missing	2L52.1a.1	5 primer miss: exon 1 to 1	No extra exon.	6e09bf87-ed95-47fc-90fb-981c43594fd3
2L52.1_NP1	2L52.1	10.6138	6.75422	1.92978	1.92978	15.9207	9.78672	3.44603	2.6879	0.424242	0.197183	0.56	Extra_UTR	2L52.1b.1	No miss exon.	No extra exon.	fac4bc00-fcc2-46ee-90e7-afa02d9fa19e
2RSSE.1_NP1	2RSSE.1	5.85968	5.37138	0.488307	0	19.348	17.9479	1.40012	0	0.277619	0.0272069	0	Intron_retention	2RSSE.1b.1	Intron retention: intron 6 to 6	No extra exon.	2cee1c08-6f03-4911-8d90-13f438396149
3R5.1_NP1	3R5.1	19.4649	6.22877	7.78596	5.45017	71.8577	24.8218	18.0505	28.9854	0.250939	0.431343	0.188031	Missing_UTR	3R5.1b.1	No miss exon.	No extra exon.	5067b862-788e-479e-b7a2-c85f2083ced2
3R5.1_NP1	3R5.1	22.3395	8.51027	3.72324	10.1059	71.8577	24.8218	18.0505	28.9854	0.342854	0.206268	0.348656	Extra_UTR	3R5.1b.1	No miss exon.	No extra exon.	ff6dc191-9a63-4c3b-a412-aa268f166543
AC3.10_NP1	AC3.10	11.9405	0	1.32672	10.6138	11.9405	0	1.32672	10.6138	NA	1	1	5'missing	AC3.10.1	5 primer miss: exon 1 to 1	No extra exon.	71bf7408-3f79-4926-8b8b-133acd096ea7
AC3.2_NP1	AC3.2	92.7157	25.9951	31.1941	35.5266	180.102	51.6328	65.6158	62.8537	0.50346	0.475405	0.565226	Extra_UTR	AC3.2.1	No miss exon.	No extra exon.	06ddc7f1-0006-4469-965e-48a9d4ae9dcd
AC3.2_NP1	AC3.2	7.42964	1.93817	3.23028	2.26119	180.102	51.6328	65.6158	62.8537	0.0375375	0.0492302	0.0359755	5'missing	AC3.2.1	5 primer miss: exon 1 to 2	No extra exon.	b230f9cc-719a-4bd8-aa2d-841b1e3fa778
AC3.2_NP2	AC3.2	9.79562	3.49844	3.14859	3.14859	180.102	51.6328	65.6158	62.8537	0.0677561	0.0479853	0.050094	5'missing	AC3.2.1	5 primer miss: exon 1 to 1	No extra exon.	bb64f2e6-6e67-4c07-ba10-6eb36bbc702b
AC3.2_NP3	AC3.2	30.8463	9.59662	11.653	9.59662	180.102	51.6328	65.6158	62.8537	0.185863	0.177595	0.152682	Intron_retention	AC3.2.1	Intron retention: intron 4 to 4	No extra exon.	d31b1f70-0eb1-4db8-bd4c-5096e708b126
AC3.5_NP1	AC3.5	15.5202	0	8.89023	6.63001	247.013	0	154.225	92.7885	NA	0.0576446	0.0714529	Intron_retention	AC3.5a.1	Intron retention: intron 5 to 5	No extra exon.	02b639a0-c4a7-4747-b5bd-63d8812a41af
AC3.5_NP1	AC3.5	12.1513	0	8.67951	3.4718	247.013	0	154.225	92.7885	NA	0.0562783	0.0374163	Intron_retention	AC3.5b.1	Intron retention: intron 7 to 7	No extra exon.	16fa4cab-97d1-4e8b-af02-055b3687028a
AC3.5_NP2	AC3.5	35.5928	0	19.3575	16.2353	247.013	0	154.225	92.7885	NA	0.125515	0.174971	Intron_retention	AC3.5a.1	Intron retention: intron 9 to 9	No extra exon.	4b2e2710-20a2-4d08-8e51-cae2c0a770f5
AC3.5_NP3	AC3.5	17.9601	0	10.1265	7.83367	247.013	0	154.225	92.7885	NA	0.0656603	0.0844251	Intron_retention	AC3.5a.1	Intron retention: intron 10 to 10	No extra exon.	502625b1-fa45-48c7-817f-c5ab0d376712
AC3.5_NP4	AC3.5	7.81387	0	5.68281	2.13106	247.013	0	154.225	92.7885	NA	0.0368476	0.0229668	Intron_retention	AC3.5b.1	Intron retention: intron 7 to 7;Intron retention: intron 9 to 9	No extra exon.	67bca578-dfa8-493a-bbc3-de4bbe4fe549
AC3.5_NP5	AC3.5	21.516	0	11.7729	9.74311	247.013	0	154.225	92.7885	NA	0.0763361	0.105003	Intron_retention	AC3.5a.1	Intron retention: intron 4 to 4	No extra exon.	6a68357d-cc55-4e53-9a43-1e9a78f9b8c0
AC3.5_NP6	AC3.5	25.8721	0	13.8152	12.0569	247.013	0	154.225	92.7885	NA	0.0895783	0.12994	Intron_retention	AC3.5a.1	Intron retention: intron 8 to 8	No extra exon.	8c0a7e86-b396-47ad-b81c-6e2bf8335e79
AC3.5_NP7	AC3.5	30.7917	0	22.4599	8.33188	247.013	0	154.225	92.7885	NA	0.145631	0.0897944	New_junction	NA	NA	NA	d6f0fec7-2a12-450e-a353-7ebab930057f
AC3.5_NP8	AC3.5	6.84443	0	4.77819	2.06624	247.013	0	154.225	92.7885	NA	0.030982	0.0222683	5'missing	AC3.5b.1	5 primer miss: exon 1 to 3	No extra exon.	ffcb417f-10f8-406a-9bea-2462a84f00df
AC3.7_NP1	AC3.7	8.26516	0	0	8.26516	33.168	3.00455	0.989671	29.1738	0	0	0.283307	Intron_retention	AC3.7.1	Intron retention: intron 3 to 3	No extra exon.	5ad7dfab-29b1-4d3b-88f0-a41b97ee6a30
AC3.8_NP1	AC3.8	7.22212	0	3.33329	3.88884	50.4154	2.62261	33.1965	14.5963	0	0.100411	0.266426	5'missing	AC3.8.1	5 primer miss: exon 1 to 1	No extra exon.	002cbc14-fde1-4b1b-9bc7-bc89eb8707a5
AC3.8_NP1	AC3.8	10.8723	0.572225	4.5778	5.72225	50.4154	2.62261	33.1965	14.5963	0.218189	0.1379	0.392034	3'missing	AC3.8.1	5 primer miss: exon 1 to 1;3 primer miss: exon 11 to 11	No extra exon.	28808609-9a09-4339-bc36-ff822066d895
AC3.8_NP2	AC3.8	8.2835	0	6.21263	2.07088	50.4154	2.62261	33.1965	14.5963	0	0.187147	0.141876	New_junction	NA	NA	NA	5a1dbc43-6a7f-4930-b01d-7ef691892702
AC3.8_NP3	AC3.8	8.20155	2.05039	5.12597	1.02519	50.4154	2.62261	33.1965	14.5963	0.781811	0.154413	0.0702364	New_junction	NA	NA	NA	b59210d7-91e6-4f05-80a1-a108c2685fdd
AC7.1_NP1	AC7.1	5.30688	1.06138	1.06138	3.18413	6.63361	1.72474	1.06138	3.84749	0.615385	1	0.827586	3'extra	AC7.1a.1	No miss exon.	5 primer extra: exon 1 to 7;3 primer extra: exon 2 to 8	741a2f83-fb4c-4e7a-b461-27bc4cb67285
AC7.2_NP1	AC7.2	103.724	46.6758	40.4523	16.5958	159.128	79.8714	57.4574	21.7997	0.584387	0.704041	0.761287	Extra_UTR	AC7.2a.2	No miss exon.	No extra exon.	1d780d99-5a39-4f10-903a-a2be9e0901ce
AC7.2_NP1	AC7.2	9.74789	6.64629	2.65851	0.443086	159.128	79.8714	57.4574	21.7997	0.0832124	0.0462693	0.0203253	5'extra	AC7.2a.2	No miss exon.	5 primer extra: exon 1 to 1	4a8889db-f5ad-4785-9348-fbd4743b224c
AC7.2_NP2	AC7.2	12.6224	6.64339	4.65038	1.32868	159.128	79.8714	57.4574	21.7997	0.0831762	0.0809361	0.0609494	Missing_UTR	AC7.2b.1	No miss exon.	No extra exon.	75db4a46-cf78-4b53-98fd-44234d4f878a
AC7.2_NP3	AC7.2	18.2168	10.4096	6.24576	1.56144	159.128	79.8714	57.4574	21.7997	0.130329	0.108702	0.0716266	Extra_UTR	AC7.2a.2	No miss exon.	No extra exon.	d4c12956-0c83-4a0d-b707-0dbe759e246a
AC7.3_NP1	AC7.3	5.30688	1.32672	3.98016	0	6.63361	1.32672	3.98016	1.32672	1	1	0	5'missing	AC7.3.1	5 primer miss: exon 1 to 1	No extra exon.	8dbfe7df-4a67-4cfa-be58-2d3f8c241cb3
AH10.1_NP1	AH10.1	11.6088	0	0	11.6088	52.4055	0	6.00341	46.4021	NA	0	0.250179	5'extra	AH10.1.1	5 primer miss: exon 1 to 2	5 primer extra: exon 1 to 1	3548f9b4-cfad-4fbd-ad7d-c87be76fdca0
AH10.1_NP1	AH10.1	19.5691	0	1.95691	17.6122	52.4055	0	6.00341	46.4021	NA	0.325967	0.379557	5'missing	AH10.1.1	5 primer miss: exon 1 to 1	No extra exon.	65808ce0-6b90-4452-a8f4-6e335c4d6395
AH10.1_NP2	AH10.1	20.2325	0	4.0465	16.186	52.4055	0	6.00341	46.4021	NA	0.674033	0.348821	Extra_UTR	AH10.1.1	No miss exon.	No extra exon.	d6b3bb58-cb39-4e0f-b726-973729dc43d2
AH6.2_NP1	AH6.2	9.95041	1.1056	3.3168	5.528	11.2771	1.1056	4.64352	5.528	1	0.714286	1	Extra_UTR	AH6.2.1	No miss exon.	No extra exon.	2eec0dea-499e-4553-9152-57b5335f53fa
AH6.5_NP1	AH6.5	13.5503	6.86311	0.703909	5.98323	616.358	251.174	33.3495	331.835	0.0273241	0.021107	0.0180308	Intron_retention	AH6.5.1	5 primer miss: exon 1 to 1;Intron retention: intron 3 to 3	No extra exon.	35070cb3-fb7a-48e3-9969-dcb2f78d848e
AH6.5_NP1	AH6.5	12.4632	5.78004	0.541878	6.14129	616.358	251.174	33.3495	331.835	0.0230121	0.0162485	0.0185071	5'missing	AH6.5.1	5 primer miss: exon 1 to 1	No extra exon.	40b67ad3-b628-43a0-b1b9-85f7bdf1228c
AH6.5_NP2	AH6.5	10.5021	4.89138	0.575456	5.03524	616.358	251.174	33.3495	331.835	0.0194741	0.0172553	0.015174	Intron_retention	AH6.5.1	Intron retention: intron 2 to 2	No extra exon.	4466780f-aaf5-4263-809f-79d8898cb281
AH6.5_NP3	AH6.5	54.7439	32.8464	3.33224	18.5653	616.358	251.174	33.3495	331.835	0.130771	0.0999186	0.0559476	5'missing	AH6.5.1	5 primer miss: exon 1 to 2	No extra exon.	481d9e69-ee03-4f8c-9d1c-9572133db5d4
AH6.5_NP4	AH6.5	69.5832	30.4427	4.89257	34.248	616.358	251.174	33.3495	331.835	0.121201	0.146706	0.103208	Intron_retention	AH6.5.1	Intron retention: intron 3 to 3	No extra exon.	56f8b209-2158-4059-9bb1-9aba1c813745
AH6.5_NP5	AH6.5	6.07065	2.69806	0.289078	3.0835	616.358	251.174	33.3495	331.835	0.0107418	0.00866814	0.00929229	New_junction	NA	NA	NA	6058e4df-7442-4fcc-b3f8-2e2aea7c69fc
AH6.5_NP6	AH6.5	6.18593	2.80118	0.350147	3.03461	616.358	251.174	33.3495	331.835	0.0111523	0.0104993	0.00914494	3'missing	AH6.5.1	3 primer miss: exon 7 to 7	No extra exon.	6944c96b-9632-4f83-81cd-7788791517ba
AH6.5_NP7	AH6.5	194.085	69.4332	9.84093	114.811	616.358	251.174	33.3495	331.835	0.276434	0.295084	0.345988	Missing_UTR	AH6.5.1	No miss exon.	No extra exon.	77ff2741-12ba-4314-b9a0-7bb91cdb8c24
AH6.5_NP8	AH6.5	9.37038	4.30116	0.614451	4.45477	616.358	251.174	33.3495	331.835	0.0171242	0.0184246	0.0134247	Intron_retention	AH6.5.1	5 primer miss: exon 1 to 1;Intron retention: intron 3 to 3	No extra exon.	9ee62dae-7fc1-446c-8e99-65347f645459
AH6.5_NP9	AH6.5	8.37248	3.80567	0.380567	4.18624	616.358	251.174	33.3495	331.835	0.0151515	0.0114115	0.0126154	Intron_retention	AH6.5.1	5 primer miss: exon 1 to 1;Intron retention: intron 3 to 3	No extra exon.	b2b1289b-67b3-402e-9b1a-47b2e9f23046
AH6.5_NP10	AH6.5	5.91331	2.67053	0.286128	2.95666	616.358	251.174	33.3495	331.835	0.0106322	0.00857967	0.00891003	Intron_retention	AH6.5.1	5 primer miss: exon 1 to 1;Intron retention: intron 3 to 3	5 primer extra: exon 1 to 1	d2c46582-a2e3-49b8-9f10-88d1d5f94240
AH6.5_NP11	AH6.5	9.65954	3.21985	0.804962	5.63473	616.358	251.174	33.3495	331.835	0.0128192	0.0241371	0.0169805	Intron_retention	AH6.5.1	5 primer miss: exon 1 to 1;Intron retention: intron 3 to 3	No extra exon.	ee0a673c-a8f8-461d-bfdc-f1a470ef9f63
AH6.5_NP12	AH6.5	11.2559	5.62793	0.468994	5.15894	616.358	251.174	33.3495	331.835	0.0224065	0.014063	0.0155467	5'missing	AH6.5.1	5 primer miss: exon 1 to 1	No extra exon.	efa08f3c-0f35-4dc3-a9a4-c6bde00f2c97
AH6.5_NP13	AH6.5	5.11828	3.33801	0	1.78027	616.358	251.174	33.3495	331.835	0.0132896	0	0.00536493	Intron_retention	AH6.5.1	Intron retention: intron 3 to 3;Intron retention: intron 5 to 5	No extra exon.	f9c84ad8-d008-4fe1-be15-e9a1737db47e
AH9.3_NP1	AH9.3	8.88903	6.46475	0.404047	2.02023	144.987	100.596	14.7361	29.6544	0.0642642	0.0274189	0.068126	Missing_UTR	AH9.3.1	No miss exon.	No extra exon.	0421f5e2-c938-4731-9086-001b004af896
AH9.3_NP1	AH9.3	13.7331	8.86009	1.77202	3.10103	144.987	100.596	14.7361	29.6544	0.0880756	0.12025	0.104572	Missing_UTR	AH9.3.1	No miss exon.	No extra exon.	25281247-4e9d-4ecc-ba9a-02375d9d69bf
AH9.3_NP2	AH9.3	70.8264	48.1085	8.01808	14.6998	144.987	100.596	14.7361	29.6544	0.478232	0.544112	0.495705	Extra_UTR	AH9.3.1	No miss exon.	No extra exon.	4cf2da1d-7ae9-401b-8168-93298d2a3f18
AH9.3_NP3	AH9.3	5.52958	4.34467	0	1.18491	144.987	100.596	14.7361	29.6544	0.0431891	0	0.0399574	3'missing	AH9.3.1	5 primer miss: exon 1 to 2;3 primer miss: exon 2 to 3	No extra exon.	4e7c2523-cc67-4138-b0d7-f540a960142d
AH9.3_NP4	AH9.3	7.27643	5.31739	0.279863	1.67918	144.987	100.596	14.7361	29.6544	0.0528587	0.0189917	0.0566249	5'extra	AH9.3.1	No miss exon.	5 primer extra: exon 1 to 1	ed5ca8b8-9f1d-45c7-a1c6-d54d4327b2da
AH9.3_NP5	AH9.3	7.27643	5.45732	0.303185	1.51592	144.987	100.596	14.7361	29.6544	0.0542497	0.0205743	0.0511197	5'extra	AH9.3.1	No miss exon.	5 primer extra: exon 1 to 1	f0d6cfd4-0246-4d32-bd53-8f900066c894
B0001.1_NP1	B0001.1	5.78028	2.58819	0.949001	2.24309	192.375	80.9994	25.4351	85.94	0.0319531	0.0373107	0.0261007	Extra_UTR	B0001.1a.1	No miss exon.	No extra exon.	15101f3e-6c4a-4faa-92df-3db4753d8c7a
B0001.1_NP1	B0001.1	6.24265	3.2328	0.668856	2.34099	192.375	80.9994	25.4351	85.94	0.0399114	0.0262966	0.0272399	Extra_UTR	B0001.1a.1	No miss exon.	No extra exon.	325f72be-a192-4c0a-976c-2bfef0f5fd91
B0001.1_NP2	B0001.1	5.9277	2.61516	0.958892	2.35364	192.375	80.9994	25.4351	85.94	0.0322862	0.0376996	0.027387	Extra_UTR	B0001.1a.1	No miss exon.	No extra exon.	34ad3692-cf86-4c28-a897-85046ba94560
B0001.1_NP3	B0001.1	15.4892	4.9049	2.32337	8.26089	192.375	80.9994	25.4351	85.94	0.0605548	0.0913452	0.0961238	Extra_UTR	B0001.1a.1	No miss exon.	No extra exon.	5d153e6f-9c13-48f7-b17e-5aacb5144ec5
B0001.1_NP4	B0001.1	8.53691	3.807	1.38436	3.34555	192.375	80.9994	25.4351	85.94	0.0470004	0.0544273	0.0389289	Extra_UTR	B0001.1a.1	No miss exon.	No extra exon.	6b2e166a-cd9b-4687-8e2d-5709d0b9cb8e
B0001.1_NP5	B0001.1	9.11721	3.62616	0.932442	4.55861	192.375	80.9994	25.4351	85.94	0.0447678	0.0366597	0.053044	Extra_UTR	B0001.1a.1	No miss exon.	No extra exon.	83caf88e-07bb-4196-91b3-c31c5d53a7d1
B0001.1_NP6	B0001.1	7.21019	3.2594	1.08647	2.86432	192.375	80.9994	25.4351	85.94	0.0402398	0.0427153	0.0333293	Extra_UTR	B0001.1a.1	No miss exon.	No extra exon.	8d520c8c-f2d1-4ebf-b421-e509f1735dd6
B0001.1_NP7	B0001.1	9.28305	3.75494	0.938736	4.58938	192.375	80.9994	25.4351	85.94	0.0463577	0.0369071	0.0534021	Extra_UTR	B0001.1a.1	No miss exon.	No extra exon.	bbfb6632-44ce-401d-9163-2937dbcc0989
B0001.1_NP8	B0001.1	6.14882	2.6734	0.980246	2.49517	192.375	80.9994	25.4351	85.94	0.0330051	0.0385391	0.0290339	Extra_UTR	B0001.1a.1	No miss exon.	No extra exon.	bd06bf4f-b226-4627-ab3f-f446b2fb9700
B0001.1_NP9	B0001.1	9.50417	3.80167	0.950417	4.75209	192.375	80.9994	25.4351	85.94	0.0469345	0.0373664	0.0552954	Extra_UTR	B0001.1a.1	No miss exon.	No extra exon.	c7087be5-6871-4d87-8a88-44bdbee57ab3
B0001.1_NP10	B0001.1	20.5307	6.58236	3.29118	10.6572	192.375	80.9994	25.4351	85.94	0.0812643	0.129395	0.124007	Extra_UTR	B0001.1a.1	No miss exon.	No extra exon.	d1944512-9c84-47c5-ae27-c9ae3c5f9c30
B0001.1_NP11	B0001.1	25.4396	8.5461	3.57744	13.316	192.375	80.9994	25.4351	85.94	0.105508	0.14065	0.154946	Extra_UTR	B0001.1a.1	No miss exon.	No extra exon.	d987e42e-67e4-4e8f-ab00-18e4cf5543dd
B0001.1_NP12	B0001.1	20.5307	6.58236	3.29118	10.6572	192.375	80.9994	25.4351	85.94	0.0812643	0.129395	0.124007	Extra_UTR	B0001.1a.1	No miss exon.	No extra exon.	e8cdd6c6-3a43-4f10-a95c-fb70d5075d29
B0001.1_NP13	B0001.1	17.2139	5.60135	2.45913	9.15342	192.375	80.9994	25.4351	85.94	0.0691529	0.0966825	0.106509	Extra_UTR	B0001.1a.1	No miss exon.	No extra exon.	ed0e57b5-312a-4735-a12a-dc188504ee0e
B0001.2_NP1	B0001.2	5.57223	0.253283	1.26642	4.05253	119.803	18.5227	17.6468	83.6334	0.0136742	0.0717647	0.0484559	Intron_retention	B0001.2.1	5 primer miss: exon 1 to 4;Intron retention: intron 7 to 8	No extra exon.	0416fcd2-f303-4288-b248-c0ef440b894a
B0001.2_NP1	B0001.2	28.3034	5.09461	2.83034	20.3784	119.803	18.5227	17.6468	83.6334	0.275046	0.160388	0.243664	Intron_retention	B0001.2.1	Intron retention: intron 4 to 4	No extra exon.	06e3f6a0-44be-4b4e-969a-f2b7779bcdb1
B0001.2_NP2	B0001.2	50.4596	9.32406	5.48474	35.6508	119.803	18.5227	17.6468	83.6334	0.503385	0.310807	0.426275	Intron_retention	B0001.2.1	Intron retention: intron 7 to 7	No extra exon.	142a31f3-99ca-4e16-9493-e5b55bedad6f
B0001.2_NP3	B0001.2	13.5326	0.966611	2.89983	9.66611	119.803	18.5227	17.6468	83.6334	0.0521851	0.164327	0.115577	5'missing	B0001.2.1	5 primer miss: exon 1 to 2	No extra exon.	6faeaf80-c73b-43e5-954a-c423cf17bf84
B0001.3_NP1	B0001.3	59.1479	17.103	11.402	30.6429	211.393	64.7161	34.6088	112.068	0.264278	0.329453	0.273432	5'missing	B0001.3c.1	5 primer miss: exon 1 to 1	No extra exon.	169b8def-4404-475a-9539-dd0f58a7f4e8
B0001.3_NP1	B0001.3	6.53867	2.17956	1.18885	3.17026	211.393	64.7161	34.6088	112.068	0.0336787	0.034351	0.0282888	3'missing	B0001.3c.1	5 primer miss: exon 1 to 1;3 primer miss: exon 9 to 9	No extra exon.	2e097aea-cd1e-4698-9a21-c89549f8ef47
B0001.3_NP2	B0001.3	9.508	2.377	1.58467	5.54633	211.393	64.7161	34.6088	112.068	0.0367297	0.0457879	0.0494909	Intron_retention	B0001.3c.1	Intron retention: intron 7 to 7	No extra exon.	678e59f9-6366-4aa9-a507-a1f586450eb6
B0001.3_NP3	B0001.3	5.74738	1.91579	1.23158	2.6	211.393	64.7161	34.6088	112.068	0.029603	0.0355857	0.0232003	New_junction	NA	NA	NA	b40e3079-1cc9-4ab6-9eed-9630de8c78d6
B0001.3_NP4	B0001.3	75.4002	22.6201	11.31	41.4701	211.393	64.7161	34.6088	112.068	0.349528	0.326796	0.370045	Extra_UTR	B0001.3c.1	No miss exon.	No extra exon.	b48ce206-866b-4fb7-b5a6-5b037a01a136
B0001.3_NP5	B0001.3	5.4157	1.84926	1.05672	2.50971	211.393	64.7161	34.6088	112.068	0.028575	0.0305333	0.0223946	Intron_retention	B0001.3c.1	Intron retention: intron 3 to 3	No extra exon.	c64b5c6d-b4d2-43fa-8566-6fc0d06f389b
B0001.3_NP6	B0001.3	6.37722	1.34257	1.00693	4.02772	211.393	64.7161	34.6088	112.068	0.0207456	0.0290946	0.03594	Fusion_gene	B0001.3a.1	5 primer miss: exon 1 to 5	3 primer extra: exon 4 to 10	eba18736-50e6-4559-9c80-c8d5cf3fa862
B0001.3_NP7	B0001.3	10.0588	4.47056	2.23528	3.35292	211.393	64.7161	34.6088	112.068	0.0690796	0.064587	0.0299187	Extra_UTR	B0001.3a.1	No miss exon.	No extra exon.	fcfecac2-f0b0-4c6d-bf4b-fe0c29c526f2
B0001.4_NP1	B0001.4	15.7127	8.17061	3.14254	4.39956	396.382	122.753	55.8877	217.742	0.0665616	0.0562296	0.0202054	5'missing	B0001.4a.1	5 primer miss: exon 1 to 1	No extra exon.	01e550e0-3796-41a5-965b-1b5e6eb35172
B0001.4_NP1	B0001.4	74.825	22.3704	13.1137	39.341	396.382	122.753	55.8877	217.742	0.182239	0.234643	0.180677	5'missing	B0001.4a.1	5 primer miss: exon 1 to 1	No extra exon.	3621a461-6481-4645-bfdd-efe14a29af4f
B0001.4_NP2	B0001.4	7.58496	2.65474	1.51699	3.41323	396.382	122.753	55.8877	217.742	0.0216267	0.0271436	0.0156756	New_junction	NA	NA	NA	50ef1af1-3382-46e3-ae86-517f514799c0
B0001.4_NP3	B0001.4	5.40114	3.12697	0.28427	1.98989	396.382	122.753	55.8877	217.742	0.0254738	0.00508646	0.00913878	5'missing	B0001.4a.1	5 primer miss: exon 1 to 1	No extra exon.	6d5b4183-6969-47b3-ae04-0aebe276f21e
B0001.4_NP4	B0001.4	9.93568	3.4261	1.37044	5.13915	396.382	122.753	55.8877	217.742	0.0279106	0.0245213	0.023602	3'missing	B0001.4a.1	3 primer miss: exon 5 to 5	No extra exon.	94baaf03-f368-4459-bb08-fb7612acf669
B0001.4_NP5	B0001.4	220.322	62.5606	29.0136	128.748	396.382	122.753	55.8877	217.742	0.509648	0.519141	0.591287	Extra_UTR	B0001.4a.1	No miss exon.	No extra exon.	fc82b2f5-6c7d-4393-b2d3-ab33f7811bbb
B0001.5_NP1	B0001.5	15.4097	10.2732	0.733798	4.40279	82.4675	34.8586	6.2441	41.3648	0.29471	0.117519	0.106438	5'missing	B0001.5.1	5 primer miss: exon 1 to 1	No extra exon.	52fea716-e786-4b96-bdc9-9518079f9c27
B0001.5_NP1	B0001.5	6.20167	2.32563	0.775209	3.10084	82.4675	34.8586	6.2441	41.3648	0.0667161	0.124151	0.0749631	Intron_retention	B0001.5.1	Intron retention: intron 2 to 2	No extra exon.	9e306e80-3964-4691-8762-15017855e96b
B0001.5_NP2	B0001.5	39.4803	14.3565	2.69184	22.432	82.4675	34.8586	6.2441	41.3648	0.411849	0.431101	0.542295	Intron_retention	B0001.5.1	Intron retention: intron 4 to 4	No extra exon.	a8ccc5ab-285e-4a38-a1dc-20a6ee66713c
B0001.6_NP1	B0001.6	38.1432	11.6673	15.706	10.7699	148.593	50.1893	61.6688	36.7347	0.232467	0.254684	0.29318	3'extra	B0001.6.1	No miss exon.	5 primer extra: exon 1 to 13;3 primer extra: exon 2 to 14	4cd8e618-523e-42c3-b399-b09d4fef6c6f
B0001.6_NP1	B0001.6	51.1893	15.5575	21.5798	14.052	148.593	50.1893	61.6688	36.7347	0.309977	0.349931	0.382526	3'extra	B0001.6.1	No miss exon.	5 primer extra: exon 1 to 13;3 primer extra: exon 2 to 14	4f6d6047-87b7-4fd6-945b-8803919e3b2c
B0001.6_NP2	B0001.6	5.74912	4.5993	1.14982	0	148.593	50.1893	61.6688	36.7347	0.091639	0.0186452	0	3'extra	B0001.6.1	No miss exon.	5 primer extra: exon 1 to 13;3 primer extra: exon 2 to 14	be26dfc7-d67f-44dc-8ec4-45a987d86413
B0001.6_NP3	B0001.6	47.6514	14.7719	20.9666	11.9128	148.593	50.1893	61.6688	36.7347	0.294324	0.339988	0.324294	3'extra	B0001.6.1	No miss exon.	5 primer extra: exon 1 to 13;3 primer extra: exon 2 to 14	f40f1c24-e4ce-4f1f-b04e-a3ce729dab57
B0001.7_NP1	B0001.7	5.92894	1.80446	0.25778	3.8667	141.747	43.4075	12.6249	85.7142	0.0415702	0.0204184	0.0451115	Extra_UTR	B0001.7a.1	No miss exon.	No extra exon.	1fc8e523-fd99-49d1-aaed-d710deef27fb
B0001.7_NP1	B0001.7	9.02462	2.70739	0.300821	6.01641	141.747	43.4075	12.6249	85.7142	0.0623714	0.0238277	0.0701915	Intron_retention	B0001.7a.1	Intron retention: intron 2 to 2	No extra exon.	3af637a6-769c-41e8-b65a-03457c013a82
B0001.7_NP2	B0001.7	73.0389	22.5894	7.52978	42.9198	141.747	43.4075	12.6249	85.7142	0.520402	0.596426	0.500731	Extra_UTR	B0001.7a.1	No miss exon.	No extra exon.	5a571b7f-6210-4d06-929d-051a39849aff
B0001.7_NP3	B0001.7	6.0395	1.76152	0.251646	4.02633	141.747	43.4075	12.6249	85.7142	0.040581	0.0199326	0.0469739	5'missing	B0001.7a.1	5 primer miss: exon 1 to 1	No extra exon.	68109299-16db-4fbc-b9ee-f2a78af3aca9
B0001.7_NP4	B0001.7	5.92894	1.80446	0.25778	3.8667	141.747	43.4075	12.6249	85.7142	0.0415702	0.0204184	0.0451115	Intron_retention	B0001.7a.1	Intron retention: intron 2 to 2	Intron extra: intron 2 to 2	b5cf41eb-c738-4ab5-8749-33b67821daee
B0001.8_NP1	B0001.8	13.2872	8.85814	2.5309	1.89817	152.905	86.1707	19.5057	47.2282	0.102798	0.129752	0.0401915	5'missing	B0001.8a.1	5 primer miss: exon 1 to 1	No extra exon.	9b576693-65e6-475b-b1ff-c1772ec330e3
B0001.8_NP1	B0001.8	64.0343	33.2727	7.53345	23.2281	152.905	86.1707	19.5057	47.2282	0.386126	0.386218	0.491827	Extra_UTR	B0001.8a.1	No miss exon.	No extra exon.	aa2c1853-276b-4652-8859-f35dd8920ee2
B0019.1_NP1	B0019.1	5.30688	0	3.53792	1.76896	70.3162	6.55556	37.7517	26.0089	0	0.0937156	0.0680136	Intron_retention	B0019.1.1	5 primer miss: exon 1 to 1;Intron retention: intron 12 to 12;3 primer miss: exon 16 to 16	No extra exon.	26751d02-01a4-4e99-8eac-773ce7c369a7
B0019.1_NP1	B0019.1	12.1911	0	8.34127	3.84982	70.3162	6.55556	37.7517	26.0089	0	0.220951	0.148019	3'missing	B0019.1.1	5 primer miss: exon 1 to 3;3 primer miss: exon 16 to 16	No extra exon.	bc87bce0-fcb1-408d-83b4-42a6cab8d568
B0019.1_NP2	B0019.1	37.1482	6.55556	15.2963	15.2963	70.3162	6.55556	37.7517	26.0089	1	0.405182	0.588117	Intron_retention	B0019.1.1	Intron retention: intron 12 to 12;3 primer miss: exon 16 to 16	No extra exon.	fbec0cf8-b2c8-4677-b8a0-65bb7be11d3b
B0019.2_NP1	B0019.2	9.34233	3.50337	3.50337	2.33558	43.7818	19.8921	12.0276	11.8622	0.176119	0.291279	0.196893	Extra_UTR	B0019.2.1	No miss exon.	No extra exon.	fd674eb4-c9c8-4863-987b-314921a4fb05
B0019.2_NP1	B0019.2	28.5798	11.4319	7.62128	9.52659	43.7818	19.8921	12.0276	11.8622	0.574697	0.633651	0.803107	Extra_UTR	B0019.2.1	No miss exon.	No extra exon.	ffdd5756-8a90-4823-978c-35921ed98a77
B0024.1_NP1	B0024.1	8.42468	0	0.526542	7.89814	70.5152	0	5.66123	64.854	NA	0.0930085	0.121783	3'extra	B0024.1.1	5 primer miss: exon 1 to 1;3 primer miss: exon 2 to 2	5 primer extra: exon 1 to 1;3 primer extra: exon 2 to 2	3b212b0d-38c9-4894-9ed3-66e19e84e924
B0024.1_NP1	B0024.1	21.6919	0	2.30765	19.3842	70.5152	0	5.66123	64.854	NA	0.407623	0.29889	3'missing	B0024.1.1	5 primer miss: exon 1 to 1;3 primer miss: exon 2 to 2	No extra exon.	508950ac-1666-4df5-b667-368836bc6c1b
B0024.1_NP2	B0024.1	8.75636	0	0.796033	7.96033	70.5152	0	5.66123	64.854	NA	0.140611	0.122742	3'extra	B0024.1.1	No miss exon.	3 primer extra: exon 3 to 3	6d344b8a-e899-4229-b7df-83726aff31e2
B0024.1_NP3	B0024.1	30.3156	0	1.80989	28.5057	70.5152	0	5.66123	64.854	NA	0.319698	0.439536	3'missing	B0024.1.1	5 primer miss: exon 1 to 1;3 primer miss: exon 2 to 2	No extra exon.	e30ba96a-2a51-4409-aa5c-7d906945f12b
B0024.10_NP1	B0024.10	16.186	5.7127	6.66482	3.80847	25.2077	9.89925	9.25193	6.05652	0.577085	0.720371	0.628821	Missing_UTR	B0024.10.1	No miss exon.	No extra exon.	701de840-da2a-4645-bac3-41ac693e3b66
B0024.11_NP1	B0024.11	7.39281	2.46427	2.08515	2.84339	266.422	83.6425	56.4586	126.321	0.0294619	0.0369323	0.0225093	5'missing	B0024.11.1	5 primer miss: exon 1 to 1	No extra exon.	0e76b18d-a34f-4250-8b0b-6246b63aae2e
B0024.11_NP1	B0024.11	6.8479	2.61832	2.01409	2.2155	266.422	83.6425	56.4586	126.321	0.0313037	0.0356737	0.0175387	3'missing	B0024.11.1	3 primer miss: exon 5 to 6	No extra exon.	1377f66e-fb1f-40a7-bbd1-375156ae4c0b
B0024.11_NP2	B0024.11	18.7015	6.35852	3.7403	8.6027	266.422	83.6425	56.4586	126.321	0.0760202	0.0662486	0.068102	3'missing	B0024.11.1	3 primer miss: exon 6 to 6	No extra exon.	27eea8d2-d496-4434-95cf-e9a8db1d993b
B0024.11_NP3	B0024.11	19.3096	7.1517	4.29102	7.86688	266.422	83.6425	56.4586	126.321	0.0855032	0.0760029	0.062277	5'missing	B0024.11.1	5 primer miss: exon 1 to 1	No extra exon.	2cf16dca-d3f5-41e3-89dd-a3ff03237349
B0024.11_NP4	B0024.11	5.75494	2.14137	1.33836	2.27521	266.422	83.6425	56.4586	126.321	0.0256015	0.0237051	0.0180114	3'missing	B0024.11.1	5 primer miss: exon 1 to 1;3 primer miss: exon 6 to 6	No extra exon.	472ece78-3fe7-4048-b361-169027651f7b
B0024.11_NP5	B0024.11	5.0821	1.73861	1.20366	2.13983	266.422	83.6425	56.4586	126.321	0.0207862	0.0213192	0.0169397	Intron_retention	B0024.11.1	Intron retention: intron 2 to 2	No extra exon.	65fdf8f2-4383-4ce0-b2c3-610d1eea791b
B0024.11_NP6	B0024.11	6.59519	2.09116	1.76944	2.73459	266.422	83.6425	56.4586	126.321	0.0250012	0.0313405	0.021648	Extra_UTR	B0024.11.1	No miss exon.	No extra exon.	7a7bd216-8cc7-4f76-9bf1-ef61d9f8cb4b
B0024.11_NP7	B0024.11	17.7728	6.42847	4.91589	6.42847	266.422	83.6425	56.4586	126.321	0.0768565	0.0870706	0.05089	Intron_retention	B0024.11.1	Intron retention: intron 4 to 4	No extra exon.	a83c2d7a-6c69-4fa8-beec-bff51061b751
B0024.11_NP8	B0024.11	141.557	39.813	23.8878	77.8566	266.422	83.6425	56.4586	126.321	0.475991	0.423103	0.616341	Intron_retention	B0024.11.1	Intron retention: intron 3 to 3	No extra exon.	de06aa0d-559f-496d-aded-8499f9b95ba2
B0024.11_NP9	B0024.11	6.31879	2.28179	1.75522	2.28179	266.422	83.6425	56.4586	126.321	0.0272802	0.0310886	0.0180634	Intron_retention	B0024.11.1	Intron retention: intron 3 to 3;3 primer miss: exon 6 to 6	No extra exon.	e0ba50c7-adb5-440e-a09d-19a6b4e8fb4c
B0024.12_NP1	B0024.12	20.8959	16.5426	2.61198	1.74132	24.876	20.5227	2.61198	1.74132	0.806061	1	1	3'missing	B0024.12.1	5 primer miss: exon 1 to 1;3 primer miss: exon 2 to 2	No extra exon.	43d81935-397c-4f4c-b8e7-2943f35e2335
B0024.13_NP1	B0024.13	14.7835	9.09752	3.41157	2.27438	172.316	42.0341	29.0612	101.22	0.216432	0.117393	0.0224696	3'missing	B0024.13.1	3 primer miss: exon 5 to 5	No extra exon.	0bd4ebb0-04b4-4371-a80a-7586fb5f8cea
B0024.13_NP1	B0024.13	106.738	21.1635	15.6426	69.9317	172.316	42.0341	29.0612	101.22	0.503485	0.538265	0.690885	Extra_UTR	B0024.13.1	No miss exon.	No extra exon.	8ece3e9e-5967-4c51-83b2-3ee0624a81b3
B0024.14_NP1	B0024.14	5.528	1.50764	2.51273	1.50764	50.4154	9.80399	34.1049	6.50653	0.153778	0.0736765	0.231711	Intron_retention	B0024.14b.1	Intron retention: intron 8 to 8	No extra exon.	76dfabc9-2840-474f-840a-93842e3a9af9
B0024.14_NP1	B0024.14	10.3816	2.5954	6.05593	1.73027	50.4154	9.80399	34.1049	6.50653	0.264729	0.177568	0.265927	Intron_retention	B0024.14b.1	Intron retention: intron 13 to 13	No extra exon.	7e64ddfb-642a-48a2-9c3b-299cf994e479
B0024.14_NP2	B0024.14	6.84367	1.4665	4.88834	0.488834	50.4154	9.80399	34.1049	6.50653	0.149582	0.143332	0.0751296	Intron_retention	B0024.14b.1	Intron retention: intron 11 to 11;3 primer miss: exon 16 to 16	No extra exon.	d629bf2b-4a55-4c2a-be4f-4e196a47cac0
B0024.15_NP1	B0024.15	5.30688	0	3.53792	1.76896	9.28705	1.32672	4.86464	3.09568	0	0.727273	0.571429	3'extra	B0024.15.1	5 primer miss: exon 1 to 1	3 primer extra: exon 6 to 6	44505997-7864-4503-940c-21b679cddd09
B0024.3_NP1	B0024.3	5.30688	2.65344	2.65344	0	7.29697	2.65344	3.98016	0	1	0.666667	NA	Extra_UTR	B0024.3.1	No miss exon.	No extra exon.	ef8ea2a1-ed1d-4cca-b9f1-f0a3e1c1ac45
B0024.4_NP1	B0024.4	5.97024	0.995041	0.995041	3.98016	30.5146	2.22226	2.22226	26.0701	0.447761	0.447761	0.152672	5'missing	B0024.4.1	5 primer miss: exon 1 to 1	No extra exon.	093a0a85-a3a4-488f-b21c-11bd025f8559
B0024.4_NP1	B0024.4	24.5443	1.22722	1.22722	22.0899	30.5146	2.22226	2.22226	26.0701	0.552239	0.552239	0.847328	Extra_UTR	B0024.4.1	No miss exon.	No extra exon.	2494f0a8-2fe4-4b01-9663-cb5fb6a931a4
B0024.8_NP1	B0024.8	5.43956	1.71775	3.43551	0.286292	29.7186	10.6384	16.5511	2.52908	0.161468	0.20757	0.1132	Intron_retention	B0024.8b.1	Intron retention: intron 2 to 2;3 primer miss: exon 13 to 14	No extra exon.	a19b6602-dcd0-4085-8b4c-0f148a753b9c
B0024.8_NP1	B0024.8	6.63361	2.65344	2.65344	1.32672	29.7186	10.6384	16.5511	2.52908	0.249422	0.160318	0.524586	Extra_UTR	B0024.8a.1	No miss exon.	No extra exon.	aefaaf0d-a935-4d6f-bab7-36ab376c3d69
B0024.9_NP1	B0024.9	114.448	22.7079	51.3198	40.42	733.605	135.951	313.304	284.35	0.16703	0.163802	0.142148	Missing_UTR	B0024.9a.1	No miss exon.	No extra exon.	04701757-8641-4898-ba2f-217cd9df8177
B0024.9_NP1	B0024.9	417.104	75.9113	169.78	171.413	733.605	135.951	313.304	284.35	0.558372	0.541903	0.602822	Extra_UTR	B0024.9a.1	No miss exon.	No extra exon.	736dad1a-4753-4011-a6c8-d12810397abe
B0024.9_NP2	B0024.9	6.01973	0.926113	1.85223	3.24139	733.605	135.951	313.304	284.35	0.0068121	0.00591192	0.0113993	5'missing	B0024.9a.1	5 primer miss: exon 1 to 1	No extra exon.	7fce3d4d-32a2-4f23-9c27-4f93e266ff25
B0024.9_NP3	B0024.9	10.7959	1.71753	4.90724	4.17115	733.605	135.951	313.304	284.35	0.0126335	0.0156629	0.0146691	Extra_UTR	B0024.9a.1	No miss exon.	No extra exon.	80e6c156-35ac-4824-a0b1-bf8c6af10e4a
B0024.9_NP4	B0024.9	13.3335	2.96301	8.14828	2.22226	733.605	135.951	313.304	284.35	0.0217947	0.0260076	0.00781521	5'missing	B0024.9a.1	5 primer miss: exon 1 to 1	No extra exon.	9aa07215-a162-4417-b7fe-fd61a9fa7220
B0024.9_NP5	B0024.9	30.0334	4.65306	12.2672	13.1132	733.605	135.951	313.304	284.35	0.034226	0.0391542	0.0461162	Extra_UTR	B0024.9a.1	No miss exon.	No extra exon.	d8269d95-031a-4d79-9541-e1982001e641
B0025.1_NP1	B0025.1	6.60596	1.73841	3.12914	1.73841	118.327	47.59	41.7754	28.9615	0.0365289	0.074904	0.0600248	5'missing	B0025.1a.1	5 primer miss: exon 1 to 1	No extra exon.	69c249b3-8ba3-45fd-b258-9299d4845f73
B0025.1_NP1	B0025.1	14.5663	5.04218	6.7229	2.80121	118.327	47.59	41.7754	28.9615	0.10595	0.16093	0.0967217	Intron_retention	B0025.1a.1	Intron retention: intron 2 to 3	No extra exon.	9f50410c-61f9-4676-9b6f-278d7d519cab
B0025.1_NP2	B0025.1	50.6089	25.3044	13.7066	11.5979	118.327	47.59	41.7754	28.9615	0.531717	0.328102	0.400458	Extra_UTR	B0025.1a.1	No miss exon.	No extra exon.	c29be08c-4f15-4584-bb85-0e3379d795cd
B0025.1_NP3	B0025.1	8.15381	3.43318	3.00403	1.71659	118.327	47.59	41.7754	28.9615	0.0721408	0.0719092	0.0592714	5'missing	B0025.1a.1	5 primer miss: exon 1 to 1	No extra exon.	c653eb3e-807d-41e6-9ba4-690a7b2596c9
B0025.1_NP4	B0025.1	6.82709	1.89641	3.41354	1.51713	118.327	47.59	41.7754	28.9615	0.0398489	0.0817119	0.0523843	5'missing	B0025.1a.1	5 primer miss: exon 1 to 1	No extra exon.	d889d044-632f-4d0f-ab7b-ca58700985ec
B0025.1_NP5	B0025.1	20.5365	7.82344	7.82344	4.88965	118.327	47.59	41.7754	28.9615	0.164392	0.187274	0.168833	Intron_retention	B0025.1a.1	Intron retention: intron 2 to 2;Intron retention: intron 4 to 4	No extra exon.	e6d2142a-8052-46ca-aa78-df8a186d2d60
B0025.2_NP1	B0025.2	5.08576	3.1786	0.63572	1.27144	457.719	223.543	96.4846	137.691	0.0142192	0.00658883	0.00923399	5'missing	B0025.2.1	5 primer miss: exon 1 to 1	No extra exon.	11c12e94-b99f-48b4-bac0-c74a142e69b4
B0025.2_NP1	B0025.2	446.42	215.332	95.8489	135.239	457.719	223.543	96.4846	137.691	0.963269	0.993411	0.982188	Extra_UTR	B0025.2.1	No miss exon.	No extra exon.	86bd28af-6ae8-4564-acb2-44c315e8a65e
B0025.4_NP1	B0025.4	6.15978	4.61983	1.53994	0	184.446	98.2272	23.2077	63.011	0.0470321	0.066355	0	Extra_UTR	B0025.4.1	No miss exon.	No extra exon.	38e86a19-940c-436c-bc78-30c8aebc0bc8
B0025.4_NP1	B0025.4	116.278	58.5759	13.114	44.5877	184.446	98.2272	23.2077	63.011	0.596331	0.565073	0.707617	Extra_UTR	B0025.4.1	No miss exon.	No extra exon.	e0f8cf7b-cd64-48c4-90cc-440373d3539c
B0025.5_NP1	B0025.5	9.06593	0	3.02198	6.04395	84.9101	0	11.5842	73.3259	NA	0.26087	0.0824259	Missing_UTR	B0025.5.1	No miss exon.	No extra exon.	9fe44ccb-b3f5-49bb-995d-d47563e9de7b
B0025.7_NP1	B0025.7	14.5939	4.29233	2.5754	7.7262	25.8711	7.75655	3.29404	14.8205	0.553382	0.781836	0.521319	3'extra	B0025.7	No miss exon.	5 primer extra: exon 1 to 2;3 primer extra: exon 2 to 3	3c68643e-60b8-406f-b892-f5da9036594b
B0025.7_NP1	B0025.7	8.62369	2.87456	0.718641	5.03048	25.8711	7.75655	3.29404	14.8205	0.370598	0.218164	0.339428	Fusion_gene	C06A5.1.1	5 primer miss: exon 1 to 10	No extra exon.	c7a6203d-c03f-44b3-a6f3-49142cf6c355
B0025.8_NP1	B0025.8	67.6628	0	6.63361	61.0292	68.9895	0	7.96033	61.0292	NA	0.833333	1	3'extra	B0025.8	No miss exon.	5 primer extra: exon 1 to 2;3 primer extra: exon 2 to 3	5caaa683-03e7-467a-9dce-b0c6ff0d7e67
B0034.1_NP1	B0034.1	19.8597	3.78281	11.3484	4.72851	52.4465	7.18477	30.4161	14.8457	0.526504	0.373106	0.318511	5'missing	B0034.1.1	5 primer miss: exon 1 to 1	No extra exon.	9f408f3e-a60f-4c12-9de7-09ead207f6ba
B0034.1_NP1	B0034.1	10.5727	0.755193	6.04154	3.77597	52.4465	7.18477	30.4161	14.8457	0.10511	0.19863	0.254348	Extra_UTR	B0034.1.1	No miss exon.	No extra exon.	e5ffafd4-74a8-466d-bf5b-1ed1ffd61f00
B0034.1_NP2	B0034.1	11.2361	0.802576	5.61803	4.81546	52.4465	7.18477	30.4161	14.8457	0.111705	0.184706	0.324368	New_junction	NA	NA	NA	e66f3d26-8b05-47c0-bbd4-320f9f554922
B0034.3_NP1	B0034.3	14.4327	2.3592	10.6858	1.38776	434.261	83.9356	314.233	36.0916	0.0281072	0.0340059	0.0384511	5'missing	B0034.3a.1	5 primer miss: exon 1 to 3	No extra exon.	03673bc3-bc9d-4fc0-9ed0-0d3d476c6c8b
B0034.3_NP1	B0034.3	5.46351	0.910585	3.64234	0.910585	434.261	83.9356	314.233	36.0916	0.0108486	0.0115912	0.0252298	Missing_UTR	B0034.3c.1	No miss exon.	No extra exon.	1374cb87-fdea-475a-9d7c-4550fee7a144
B0034.3_NP2	B0034.3	9.78921	1.59359	7.17117	1.02445	434.261	83.9356	314.233	36.0916	0.0189859	0.0228211	0.0283848	5'missing	B0034.3a.1	5 primer miss: exon 1 to 4	No extra exon.	15c4046e-735d-4b81-a621-ad6c30725c56
B0034.3_NP3	B0034.3	5.44903	0	4.6706	0.778433	434.261	83.9356	314.233	36.0916	0	0.0148635	0.0215683	5'missing	B0034.3a.1	5 primer miss: exon 1 to 7	No extra exon.	18659cc6-e8ca-4ab7-87c3-be8b9627a0d4
B0034.3_NP4	B0034.3	6.21081	0.887259	4.73205	0.591506	434.261	83.9356	314.233	36.0916	0.0105707	0.015059	0.016389	Extra_UTR	B0034.3c.1	No miss exon.	No extra exon.	1e0a8486-e164-4bb6-b639-c7b7a85c5fe6
B0034.3_NP5	B0034.3	9.32591	1.4785	6.93757	0.909845	434.261	83.9356	314.233	36.0916	0.0176147	0.0220778	0.0252093	3'missing	B0034.3a.1	5 primer miss: exon 1 to 3;3 primer miss: exon 12 to 12	No extra exon.	294ade85-fa7c-4d94-bce7-b59ed2192c44
B0034.3_NP6	B0034.3	19.9863	3.74743	14.4544	1.78449	434.261	83.9356	314.233	36.0916	0.0446465	0.0459988	0.0494433	5'missing	B0034.3a.1	5 primer miss: exon 1 to 3	No extra exon.	2e07a27e-0d23-4221-bdae-e4ccdc9fe517
B0034.3_NP7	B0034.3	14.338	2.36646	10.7187	1.25283	434.261	83.9356	314.233	36.0916	0.0281938	0.0341106	0.0347126	3'missing	B0034.3a.1	5 primer miss: exon 1 to 3;3 primer miss: exon 12 to 12	No extra exon.	3a26377b-1eb1-4e4a-8811-25ff474089e8
B0034.3_NP8	B0034.3	6.12687	1.75053	3.50107	0.875267	434.261	83.9356	314.233	36.0916	0.0208557	0.0111416	0.0242513	Extra_UTR	B0034.3b.1	No miss exon.	No extra exon.	4c172c6a-ead1-4433-b552-15088c2ebd48
B0034.3_NP9	B0034.3	69.3514	15.978	48.6139	4.75941	434.261	83.9356	314.233	36.0916	0.19036	0.154706	0.13187	5'missing	B0034.3a.1	5 primer miss: exon 1 to 1	No extra exon.	623aef69-70f8-4006-81e7-d2960eb7a100
B0034.3_NP10	B0034.3	103.957	22.5566	75.0253	6.3747	434.261	83.9356	314.233	36.0916	0.268738	0.238757	0.176626	Intron_retention	B0034.3a.1	Intron retention: intron 4 to 4	No extra exon.	73a4bed2-66c2-4489-9406-fc5a967511bd
B0034.3_NP11	B0034.3	51.717	10.8245	36.9837	3.90884	434.261	83.9356	314.233	36.0916	0.128962	0.117695	0.108303	5'missing	B0034.3a.1	5 primer miss: exon 1 to 1	No extra exon.	9048f987-5098-4db8-b36a-3880ee688117
B0034.3_NP12	B0034.3	9.16007	1.45221	6.8142	0.893666	434.261	83.9356	314.233	36.0916	0.0173014	0.0216852	0.024761	3'missing	B0034.3a.1	5 primer miss: exon 1 to 3;3 primer miss: exon 12 to 12	No extra exon.	ab5e3f83-7361-4aa6-847f-aa2f214d78ec
B0034.3_NP13	B0034.3	16.5492	2.65411	12.4899	1.40512	434.261	83.9356	314.233	36.0916	0.0316208	0.0397473	0.038932	3'missing	B0034.3a.1	3 primer miss: exon 12 to 12	No extra exon.	bd7953cf-dc08-4dc7-938b-b1b41a221214
B0034.3_NP14	B0034.3	19.9863	3.68168	14.3761	1.9285	434.261	83.9356	314.233	36.0916	0.0438632	0.0457497	0.0534335	5'missing	B0034.3a.1	5 primer miss: exon 1 to 3	No extra exon.	c96271dd-8783-4f66-ad91-9242c43c80d3
B0034.3_NP15	B0034.3	8.11876	1.30948	5.7617	1.04758	434.261	83.9356	314.233	36.0916	0.015601	0.0183357	0.0290256	New_junction	NA	NA	NA	d3b02495-a6f0-4737-acce-fdf5c8a3db59
B0034.3_NP16	B0034.3	24.5922	3.6165	18.8058	2.1699	434.261	83.9356	314.233	36.0916	0.0430867	0.0598466	0.060122	5'missing	B0034.3a.1	5 primer miss: exon 1 to 7	No extra exon.	d470c312-4d47-4838-8b80-018050bf3755
B0034.3_NP17	B0034.3	14.0247	2.33745	10.4498	1.23747	434.261	83.9356	314.233	36.0916	0.0278482	0.0332549	0.034287	Intron_retention	B0034.3a.1	5 primer miss: exon 1 to 1;Intron retention: intron 10 to 10	No extra exon.	f210ce0f-c1e9-47f4-b7d5-e55e0c4a1088
B0034.7_NP1	B0034.7	19.2375	17.955	1.2825	0	19.9008	18.6183	1.2825	0	0.964371	1	NA	Extra_UTR	B0034.7.1	No miss exon.	No extra exon.	da4ff908-dcf7-453c-98d0-af82ff85ccec
B0035.1_NP1	B0035.1	9.33014	6.22009	0	3.11005	646.839	322.285	77.4042	247.15	0.0193	0	0.0125836	5'missing	B0035.1b.1	5 primer miss: exon 1 to 4	No extra exon.	06aead28-b83b-4324-9682-904332c2e9e3
B0035.1_NP1	B0035.1	9.74128	7.17779	0	2.5635	646.839	322.285	77.4042	247.15	0.0222715	0	0.0103722	5'missing	B0035.1b.1	5 primer miss: exon 1 to 3	No extra exon.	75739815-025d-4c1f-9bbc-86ee5e334b86
B0035.1_NP2	B0035.1	59.0059	33.7177	6.32206	18.9662	646.839	322.285	77.4042	247.15	0.104621	0.081676	0.0767396	Missing_UTR	B0035.1a.1	No miss exon.	No extra exon.	a6ef9e66-5db7-4321-ba0e-be678b8b92c2
B0035.1_NP3	B0035.1	331.656	153.529	44.1077	134.019	646.839	322.285	77.4042	247.15	0.476375	0.569836	0.54226	Extra_UTR	B0035.1b.1	No miss exon.	No extra exon.	af24b1e5-9d13-4640-8c6f-aa098e668f03
B0035.1_NP4	B0035.1	5.25991	3.75708	0.500944	1.00189	646.839	322.285	77.4042	247.15	0.0116576	0.0064718	0.00405377	Extra_UTR	B0035.1b.1	No miss exon.	No extra exon.	b5c02c3d-8333-44f9-8cf6-398a6d3c9350
B0035.1_NP5	B0035.1	21.2789	9.11954	1.82391	10.3355	646.839	322.285	77.4042	247.15	0.0282965	0.0235634	0.0418187	5'missing	B0035.1b.1	5 primer miss: exon 1 to 2	No extra exon.	bd1dbace-aee2-407d-b394-d3a4391352af
B0035.1_NP6	B0035.1	22.3698	11.4577	2.18242	8.72968	646.839	322.285	77.4042	247.15	0.0355514	0.0281951	0.0353214	Intron_retention	B0035.1b.1	Intron retention: intron 3 to 3	No extra exon.	bd3cfec6-74e0-4d45-8c8a-e4ce0664a9c8
B0035.1_NP7	B0035.1	12.6126	7.2618	0.3822	4.9686	646.839	322.285	77.4042	247.15	0.0225322	0.00493772	0.0201036	5'missing	B0035.1b.1	5 primer miss: exon 1 to 1	No extra exon.	efbbfb75-8f8b-4326-a3b9-5854bbc82712
B0035.10_NP1	B0035.10	9.28705	5.30688	1.32672	2.65344	9.28705	5.30688	1.32672	2.65344	1	1	1	3'missing	B0035.10.1	5 primer miss: exon 1 to 1;3 primer miss: exon 2 to 2	No extra exon.	c6800a19-8a1e-4ca2-86a1-b31918e45a06
B0035.11_NP1	B0035.11	10.9197	5.95621	1.48905	3.47445	472.805	180.2	85.0834	207.522	0.0330534	0.0175011	0.0167426	3'missing	B0035.11.1	3 primer miss: exon 7 to 7	No extra exon.	1ecbd949-7046-4be6-9160-dd26779eb3e2
B0035.11_NP1	B0035.11	14.3535	6.60718	2.50617	5.24017	472.805	180.2	85.0834	207.522	0.0366659	0.0294555	0.0252512	Intron_retention	B0035.11.1	5 primer miss: exon 1 to 1;Intron retention: intron 3 to 3	No extra exon.	221b4282-8ba1-49c0-a401-a1bdfe3f0eca
B0035.11_NP2	B0035.11	5.25171	2.56479	0.85493	1.83199	472.805	180.2	85.0834	207.522	0.014233	0.0100481	0.00882795	Extra_UTR	B0035.11.1	No miss exon.	No extra exon.	26e7f6a0-be34-4281-9224-6543938e91ba
B0035.11_NP3	B0035.11	283.957	95.858	50.642	137.457	472.805	180.2	85.0834	207.522	0.531955	0.595204	0.662373	Missing_UTR	B0035.11.1	No miss exon.	No extra exon.	4c2a44e8-6c65-439e-98c4-320b55f242cf
B0035.11_NP4	B0035.11	13.918	6.46195	1.73976	5.71634	472.805	180.2	85.0834	207.522	0.0358599	0.0204476	0.0275457	Intron_retention	B0035.11.1	Intron retention: intron 3 to 3	No extra exon.	60c66d15-5604-42a3-9161-1b8b7a70ea7d
B0035.11_NP5	B0035.11	13.1978	4.51504	2.77849	5.90429	472.805	180.2	85.0834	207.522	0.0250558	0.0326561	0.0284514	3'missing	B0035.11.1	5 primer miss: exon 1 to 6;3 primer miss: exon 2 to 7	No extra exon.	7c31b21e-4328-470b-ad77-23e519e9d90f
B0035.11_NP6	B0035.11	77.9392	33.1963	15.8765	28.8664	472.805	180.2	85.0834	207.522	0.18422	0.186599	0.1391	3'missing	B0035.11.1	5 primer miss: exon 1 to 1;3 primer miss: exon 7 to 7	No extra exon.	82c50d36-9a3f-4116-95b5-0e324e71fd0a
B0035.11_NP7	B0035.11	22.6302	11.1557	3.18735	8.28711	472.805	180.2	85.0834	207.522	0.0619076	0.0374615	0.0399337	Intron_retention	B0035.11.1	Intron retention: intron 4 to 4	No extra exon.	d5b78d05-5943-49e4-a589-6f559080cd98
B0035.12_NP1	B0035.12	8.4567	1.24363	2.73599	4.47708	263.982	32.5181	56.0881	175.376	0.0382443	0.0487803	0.0255285	5'missing	B0035.12.4	5 primer miss: exon 1 to 2	No extra exon.	1ef92278-9c37-47d2-a369-14fffb447f65
B0035.12_NP1	B0035.12	9.04033	1.29148	2.32466	5.4242	263.982	32.5181	56.0881	175.376	0.0397155	0.0414465	0.030929	5'missing	B0035.12.4	5 primer miss: exon 1 to 4	No extra exon.	36360525-4cbc-425c-9079-618ceeebcea1
B0035.12_NP2	B0035.12	6.18285	1.10974	1.90242	3.17069	263.982	32.5181	56.0881	175.376	0.0341269	0.0339184	0.0180794	Intron_retention	B0035.12.4	5 primer miss: exon 1 to 2;Intron retention: intron 6 to 6	No extra exon.	5fd4930e-3c8a-4e97-8974-90de01e60d4f
B0035.12_NP3	B0035.12	79.7179	10.2862	15.8579	53.5739	263.982	32.5181	56.0881	175.376	0.316321	0.282732	0.305481	Extra_UTR	B0035.12.4	No miss exon.	No extra exon.	9eb1ef25-e9ba-4cee-9ba8-6584b5ad81e2
B0035.12_NP4	B0035.12	13.2713	2.43759	3.25012	7.58362	263.982	32.5181	56.0881	175.376	0.074961	0.0579468	0.0432422	Intron_retention	B0035.12.4	Intron retention: intron 3 to 3	No extra exon.	c3e67f20-7f0b-48d4-a01e-39a198244d4d
B0035.12_NP5	B0035.12	9.92481	1.27241	2.29034	6.36206	263.982	32.5181	56.0881	175.376	0.0391293	0.0408347	0.0362767	Intron_retention	B0035.12.4	Intron retention: intron 6 to 6	No extra exon.	d1aaf05d-769f-4db0-a706-411a9a9487b1
B0035.12_NP6	B0035.12	5.94464	1.11462	1.67193	3.15809	263.982	32.5181	56.0881	175.376	0.0342769	0.029809	0.0180076	5'missing	B0035.12.4	5 primer miss: exon 1 to 5	No extra exon.	dab7b14b-ecfc-4096-a2ce-a7c7d3282ab0
B0035.13_NP1	B0035.13	6.53012	0	4.57109	1.95904	282.592	0.797315	124.804	156.991	0	0.0366262	0.0124787	3'missing	B0035.13.2	5 primer miss: exon 1 to 1;3 primer miss: exon 5 to 5	No extra exon.	2f1fce07-e116-4e5c-897e-2edd75269b3c
B0035.13_NP1	B0035.13	31.8926	0.797315	19.1356	11.9597	282.592	0.797315	124.804	156.991	1	0.153325	0.0761812	5'missing	B0035.13.2	5 primer miss: exon 1 to 1	No extra exon.	2fcffb65-130c-4506-b6ae-6d0f578b6441
B0035.13_NP2	B0035.13	5.55351	0	4.62792	0.925585	282.592	0.797315	124.804	156.991	0	0.0370816	0.0058958	5'missing	B0035.13.2	5 primer miss: exon 1 to 3	No extra exon.	42a4b177-f780-4abf-b315-d7ef45d587aa
B0035.13_NP3	B0035.13	7.45883	0	5.10341	2.35542	282.592	0.797315	124.804	156.991	0	0.0408915	0.0150036	3'missing	B0035.13.2	3 primer miss: exon 5 to 5	No extra exon.	a53d73b3-058e-46f7-a694-38b83624102d
B0035.13_NP4	B0035.13	196.848	0	70.4765	126.372	282.592	0.797315	124.804	156.991	0	0.564699	0.804964	Missing_UTR	B0035.13.2	No miss exon.	No extra exon.	aed3fa93-a13b-4520-a8b7-dd9562375ac0
B0035.13_NP5	B0035.13	7.08651	0	3.2707	3.81581	282.592	0.797315	124.804	156.991	0	0.0262068	0.024306	3'missing	B0035.13.2	3 primer miss: exon 5 to 5	No extra exon.	dad1226d-80fb-492c-99c5-2e36d8fa29d1
B0035.13_NP6	B0035.13	6.97595	0	5.23196	1.74399	282.592	0.797315	124.804	156.991	0	0.0419216	0.0111089	5'missing	B0035.13.2	5 primer miss: exon 1 to 1	No extra exon.	f984e197-00a9-4639-9a6e-b00171784885
B0035.14_NP1	B0035.14	8.58157	4.68086	1.17021	2.7305	222.226	95.5061	44.8496	81.8701	0.049011	0.026092	0.0333516	Extra_UTR	B0035.14b.1	No miss exon.	No extra exon.	0ae6872d-405a-4a8a-96b9-5b0fbd1aa280
B0035.14_NP1	B0035.14	14.2201	7.35524	1.9614	4.90349	222.226	95.5061	44.8496	81.8701	0.0770133	0.0437328	0.0598936	5'missing	B0035.14a.1	5 primer miss: exon 1 to 2	No extra exon.	76b4b097-6986-496d-9413-02108da19622
B0035.14_NP2	B0035.14	6.25981	3.1299	0.695534	2.43437	222.226	95.5061	44.8496	81.8701	0.0327717	0.0155082	0.0297346	5'missing	B0035.14a.1	5 primer miss: exon 1 to 2	No extra exon.	7c2d735c-6f89-44f8-9a98-9c76d3ce2472
B0035.14_NP3	B0035.14	63.9722	30.1046	12.23	21.6376	222.226	95.5061	44.8496	81.8701	0.315211	0.272689	0.264293	5'missing	B0035.14a.1	5 primer miss: exon 1 to 1	No extra exon.	85c18491-c6ce-4b2d-af0c-f167db8e2f51
B0035.14_NP4	B0035.14	5.37533	2.95643	0.268766	2.15013	222.226	95.5061	44.8496	81.8701	0.0309554	0.00599262	0.0262627	New_junction	B0035.14a.1	No miss exon.	Intron extra: intron 3 to 3	ddb5a3ad-62f8-43fc-a98f-0b55072e3521
B0035.14_NP5	B0035.14	6.5599	3.27995	1.31198	1.96797	222.226	95.5061	44.8496	81.8701	0.0343428	0.0292529	0.0240377	Missing_UTR	B0035.14a.1	No miss exon.	No extra exon.	ed9226e8-e67c-445f-a236-74036ec0f01f
B0035.14_NP6	B0035.14	8.58157	4.68086	1.17021	2.7305	222.226	95.5061	44.8496	81.8701	0.049011	0.026092	0.0333516	Extra_UTR	B0035.14b.1	No miss exon.	No extra exon.	f2e44ca2-ba94-4562-8450-c0dab7cee79f
B0035.15_NP1	B0035.15	57.8902	15.1304	6.57844	36.1814	199.825	54.5863	22.3148	122.924	0.277183	0.294801	0.29434	Intron_retention	B0035.15.1	Intron retention: intron 4 to 4	No extra exon.	141a540e-e782-4173-8b38-354c3904bc46
B0035.15_NP1	B0035.15	8.91264	3.24096	1.62048	4.0512	199.825	54.5863	22.3148	122.924	0.0593732	0.072619	0.032957	5'missing	B0035.15.1	5 primer miss: exon 1 to 1	No extra exon.	2c9b8efb-191e-4b65-b1e9-ed32c1c870a0
B0035.15_NP2	B0035.15	82.7794	21.0853	7.80938	53.8847	199.825	54.5863	22.3148	122.924	0.386275	0.349964	0.438359	Missing_UTR	B0035.15.1	No miss exon.	No extra exon.	4ab2452f-145a-4dab-8d9c-783057ab3928
B0035.15_NP3	B0035.15	29.2367	8.06531	5.04082	16.1306	199.825	54.5863	22.3148	122.924	0.147753	0.225895	0.131225	Intron_retention	B0035.15.1	Intron retention: intron 4 to 4	No extra exon.	65d59879-b100-49ef-b1a7-45ba1bdd2929
B0035.15_NP4	B0035.15	8.5678	1.80375	0.901874	5.86218	199.825	54.5863	22.3148	122.924	0.033044	0.0404159	0.0476896	Missing_UTR	B0035.15.1	No miss exon.	No extra exon.	b9f5f36a-e863-4233-b553-875a46c23eb5
B0035.16_NP1	B0035.16	11.2771	2.50603	0.626507	8.14459	23.881	6.17402	1.21183	16.4951	0.405899	0.516995	0.493757	5'missing	B0035.16.1	5 primer miss: exon 1 to 2	No extra exon.	49198b8d-dd65-48aa-a933-b9ead326b92f
B0035.16_NP1	B0035.16	9.95041	2.34127	0.585318	7.02382	23.881	6.17402	1.21183	16.4951	0.379213	0.483005	0.425812	Extra_UTR	B0035.16.1	No miss exon.	No extra exon.	9a3c67d1-5ecf-4916-9fd2-4fa58336ffd8
B0035.18_NP1	B0035.18	39.0719	8.95398	6.51199	23.606	181.385	35.676	20.3402	125.369	0.25098	0.320154	0.188292	Extra_UTR	B0035.18.1	No miss exon.	No extra exon.	90276d6d-534e-4ea7-b001-e71dd8ffcafa
B0035.18_NP1	B0035.18	7.00951	2.72592	1.16825	3.11534	181.385	35.676	20.3402	125.369	0.0764076	0.0574356	0.0248494	3'missing	B0035.18.1	5 primer miss: exon 1 to 1;3 primer miss: exon 2 to 2	No extra exon.	a2d582ab-ca05-4bff-ab7e-f58d8c5f51d0
B0035.18_NP2	B0035.18	106.514	18.6399	10.6514	77.2223	181.385	35.676	20.3402	125.369	0.522476	0.523661	0.615962	3'missing	B0035.18.1	5 primer miss: exon 1 to 1;3 primer miss: exon 2 to 2	No extra exon.	d74980ef-6a48-4547-bcff-ee11873e22ff
B0035.2_NP1	B0035.2	10.9908	5.71523	3.07743	2.19816	195.028	81.1219	29.2245	84.6816	0.0704523	0.105303	0.025958	5'missing	B0035.2.1	5 primer miss: exon 1 to 1	No extra exon.	583a1781-e1dc-4bfa-9e95-92eb44310b27
B0035.2_NP1	B0035.2	126.769	50.2706	13.1141	63.3847	195.028	81.1219	29.2245	84.6816	0.619692	0.448736	0.748506	Missing_UTR	B0035.2.1	No miss exon.	No extra exon.	60f2a2f1-f094-4b99-b5b0-0a4729fb65c7
B0035.2_NP2	B0035.2	6.23674	2.49469	1.55918	2.18286	195.028	81.1219	29.2245	84.6816	0.0307524	0.053352	0.0257772	3'missing	B0035.2.1	3 primer miss: exon 6 to 6	No extra exon.	d40b3c20-6bbb-4929-bd25-830f83f4c9d8
B0035.2_NP3	B0035.2	25.8153	10.1417	4.60988	11.0637	195.028	81.1219	29.2245	84.6816	0.125019	0.157741	0.130651	Intron_retention	B0035.2.1	Intron retention: intron 2 to 2	No extra exon.	dc088a2b-e03a-4877-9c58-14e623a4aa2e
B0035.2_NP4	B0035.2	5.99351	2.85405	1.71243	1.42703	195.028	81.1219	29.2245	84.6816	0.0351822	0.0585958	0.0168517	5'missing	B0035.2.1	5 primer miss: exon 1 to 2	No extra exon.	f401c065-76eb-495b-a429-66dcb72c6298
B0035.3_NP1	B0035.3	12.3459	5.97381	2.38952	3.98254	312.104	93.3112	37.4186	181.374	0.0640203	0.0638593	0.0219576	Missing_UTR	B0035.3.1	No miss exon.	No extra exon.	00163d99-9034-4d7d-86b4-b4cc7174be23
B0035.3_NP1	B0035.3	5.24792	2.88636	0.524792	1.83677	312.104	93.3112	37.4186	181.374	0.0309326	0.0140249	0.010127	5'missing	B0035.3.1	5 primer miss: exon 1 to 2	No extra exon.	2158e416-ea9f-4a24-b799-3fad03b6914a
B0035.3_NP2	B0035.3	23.1587	9.92514	3.30838	9.92514	312.104	93.3112	37.4186	181.374	0.106366	0.0884153	0.0547219	5'missing	B0035.3.1	5 primer miss: exon 1 to 1	No extra exon.	ac8c0073-0d7f-484b-89bf-b02e80b116b4
B0035.3_NP3	B0035.3	232.338	58.0846	25.0561	149.198	312.104	93.3112	37.4186	181.374	0.622483	0.669616	0.822597	Missing_UTR	B0035.3.1	No miss exon.	No extra exon.	ed411201-58c2-4783-9cc5-1b21cb6cf2f8
B0035.3_NP4	B0035.3	15.9059	6.20718	2.71564	6.98308	312.104	93.3112	37.4186	181.374	0.0665213	0.0725747	0.038501	5'missing	B0035.3.1	5 primer miss: exon 1 to 1	No extra exon.	fd45cb71-e09a-421f-b707-86c90b5e5c5c
B0035.4_NP1	B0035.4	14.9919	7.91242	3.74799	3.33154	310.453	99.7038	59.4548	151.294	0.0793592	0.0630393	0.0220203	3'extra	B0035.4.1	No miss exon.	5 primer extra: exon 1 to 2;3 primer extra: exon 2 to 3	0d605cc4-acc8-4b9d-94dd-b0b4894983c9
B0035.4_NP1	B0035.4	72.2621	21.1293	13.9453	37.1875	310.453	99.7038	59.4548	151.294	0.21192	0.234553	0.245796	3'extra	B0035.4.1	No miss exon.	5 primer extra: exon 1 to 1;3 primer extra: exon 2 to 2	7e016511-1141-4d8b-8d88-b9b41d39e100
B0035.4_NP2	B0035.4	136.829	44.3935	24.3252	68.1105	310.453	99.7038	59.4548	151.294	0.445253	0.409138	0.450186	3'extra	B0035.4.1	No miss exon.	5 primer extra: exon 1 to 2;3 primer extra: exon 2 to 3	a76972a1-eff3-432a-b2a3-2c7439fa0b5d
B0035.4_NP3	B0035.4	72.4832	20.4658	14.4966	37.5207	310.453	99.7038	59.4548	151.294	0.205266	0.243826	0.247998	3'extra	B0035.4.1	No miss exon.	5 primer extra: exon 1 to 2;3 primer extra: exon 2 to 3	e41bac9a-7f1f-4b43-abd7-0a943ddca7b3
B0035.5_NP1	B0035.5	5.65292	1.55455	1.27191	2.82646	312.506	70.4387	66.4943	175.573	0.0220696	0.0191281	0.0160985	5'extra	B0035.5.1	5 primer miss: exon 1 to 2	5 primer extra: exon 1 to 1	1aa921eb-2967-4e9c-b28d-2ddf056de6af
B0035.5_NP1	B0035.5	6.90326	2.0919	0.836758	3.9746	312.506	70.4387	66.4943	175.573	0.0296981	0.0125839	0.0226379	Intron_retention	B0035.5.1	Intron retention: intron 3 to 3	No extra exon.	33ced4c1-0c4e-4f48-9093-6343b8a6a4cf
B0035.5_NP2	B0035.5	15.0505	3.49387	4.03139	7.52526	312.506	70.4387	66.4943	175.573	0.0496016	0.0606276	0.0428612	Missing_UTR	B0035.5.1	No miss exon.	No extra exon.	7a64cd9b-c6d7-44ab-a0e9-21f755d6cf0e
B0035.5_NP3	B0035.5	171.692	35.3737	36.2365	100.082	312.506	70.4387	66.4943	175.573	0.502192	0.544957	0.57003	Extra_UTR	B0035.5.1	No miss exon.	No extra exon.	ada87573-0cb6-4181-a800-0ca6d68c6cb8
B0035.5_NP4	B0035.5	7.31132	2.08895	1.74079	3.48158	312.506	70.4387	66.4943	175.573	0.0296563	0.0261796	0.0198298	5'missing	B0035.5.1	5 primer miss: exon 1 to 2	No extra exon.	be127396-88e2-4dce-85f0-37e780b1e46d
B0035.5_NP5	B0035.5	14.94	3.81446	3.49659	7.62892	312.506	70.4387	66.4943	175.573	0.0541529	0.0525848	0.0434516	5'missing	B0035.5.1	5 primer miss: exon 1 to 3	No extra exon.	c20766c1-15b5-4fd2-a4d5-6c91d28ed03a
B0035.5_NP6	B0035.5	9.06593	0.604395	3.62637	4.83516	312.506	70.4387	66.4943	175.573	0.00858045	0.0545365	0.0275393	Intron_retention	B0035.5.1	5 primer miss: exon 1 to 1;Intron retention: intron 7 to 7	No extra exon.	ddc5940c-2b34-4df8-abb0-6b8bd5635139
B0035.5_NP7	B0035.5	5.65292	1.55455	1.27191	2.82646	312.506	70.4387	66.4943	175.573	0.0220696	0.0191281	0.0160985	New_junction	NA	NA	NA	f392d121-3dba-45e9-89eb-19b4b936399e
B0035.6_NP1	B0035.6	5.19632	1.73211	0	3.46422	105.947	44.1184	4.97185	56.8568	0.0392604	0	0.0609287	3'missing	B0035.6.1	3 primer miss: exon 7 to 7	No extra exon.	0f725987-164c-4daa-aa52-a29122cefe4f
B0035.6_NP1	B0035.6	10.5832	5.06155	0.920281	4.60141	105.947	44.1184	4.97185	56.8568	0.114726	0.185098	0.0809297	5'missing	B0035.6.1	5 primer miss: exon 1 to 2	No extra exon.	26b7b7fa-e5ea-4e5a-9274-722a18b5637d
B0035.6_NP2	B0035.6	6.93475	3.01511	0.301511	3.61813	105.947	44.1184	4.97185	56.8568	0.0683413	0.0606436	0.0636358	3'missing	B0035.6.1	5 primer miss: exon 1 to 3;3 primer miss: exon 7 to 7	No extra exon.	26b82dc6-2dac-41d5-9481-9a34720ea82e
B0035.6_NP3	B0035.6	17.9908	8.43317	1.12442	8.43317	105.947	44.1184	4.97185	56.8568	0.191149	0.226158	0.148323	5'missing	B0035.6.1	5 primer miss: exon 1 to 1	No extra exon.	52fc798d-7acc-4ef0-92a6-0231abaf8a46
B0035.6_NP4	B0035.6	9.13963	3.91699	0	5.22265	105.947	44.1184	4.97185	56.8568	0.0887835	0	0.0918561	3'missing	B0035.6.1	3 primer miss: exon 7 to 7	No extra exon.	5db304d2-3423-484d-b57a-d2f17858328b
B0041.2_NP1	B0041.2	30.0023	20.6266	3.56277	5.81294	488.233	304.379	73.8455	110.009	0.067766	0.0482463	0.0528409	3'extra	B0041.2c.2	No miss exon.	3 primer extra: exon 8 to 8	08948c78-bc5e-4892-8d39-cf925be51419
B0041.2_NP1	B0041.2	23.3908	15.3072	2.40788	5.67571	488.233	304.379	73.8455	110.009	0.0502899	0.0326069	0.0515933	5'missing	B0041.2g.2	5 primer miss: exon 1 to 1	No extra exon.	13c86fdc-be3c-41db-b052-99a507856f7c
B0041.2_NP2	B0041.2	29.1399	19.9054	2.87295	6.36153	488.233	304.379	73.8455	110.009	0.0653968	0.0389049	0.0578276	5'missing	B0041.2c.2	5 primer miss: exon 1 to 3	No extra exon.	16b09947-efb9-4f29-b84b-1945699c573c
B0041.2_NP3	B0041.2	8.23932	5.36945	1.01834	1.85153	488.233	304.379	73.8455	110.009	0.0176406	0.0137902	0.0168308	3'extra	B0041.2c.2	5 primer miss: exon 1 to 1	3 primer extra: exon 7 to 7	438aaf30-823a-49f8-a637-ba969b1042f5
B0041.2_NP4	B0041.2	9.4002	6.2668	1.04447	2.08893	488.233	304.379	73.8455	110.009	0.0205888	0.0141439	0.0189888	3'missing	B0041.2f.1	3 primer miss: exon 9 to 9	No extra exon.	4b413155-8dc6-4529-8459-581e2d9f7ee0
B0041.2_NP5	B0041.2	6.39139	3.99462	0.878816	1.51796	488.233	304.379	73.8455	110.009	0.0131238	0.0119007	0.0137985	5'missing	B0041.2g.2	5 primer miss: exon 1 to 2	No extra exon.	4c209d83-dd10-414d-8ecf-616c95d0fcd9
B0041.2_NP6	B0041.2	13.4278	9.14476	1.38908	2.89391	488.233	304.379	73.8455	110.009	0.030044	0.0188106	0.0263063	5'missing	B0041.2c.2	5 primer miss: exon 1 to 3	No extra exon.	543887b9-0850-486a-8ce2-5f44be2c9ad7
B0041.2_NP7	B0041.2	70.1624	45.5014	13.8936	10.7675	488.233	304.379	73.8455	110.009	0.149489	0.188143	0.0978788	Intron_retention	B0041.2c.2	Intron retention: intron 2 to 2	No extra exon.	5cd71e1e-4985-4135-8f6c-1d2fd4e4a6d4
B0041.2_NP8	B0041.2	41.6	18.2292	5.14158	18.2292	488.233	304.379	73.8455	110.009	0.0598899	0.0696261	0.165707	Extra_UTR	B0041.2b.1	No miss exon.	No extra exon.	78ed7a4a-7d9f-44bd-a965-e72d11ebcb2f
B0041.2_NP9	B0041.2	6.39139	3.99462	0.878816	1.51796	488.233	304.379	73.8455	110.009	0.0131238	0.0119007	0.0137985	New_junction	NA	NA	NA	7ab3c8d1-b37a-41a9-be37-a7a542782273
B0041.2_NP10	B0041.2	6.39139	3.99462	0.878816	1.51796	488.233	304.379	73.8455	110.009	0.0131238	0.0119007	0.0137985	5'missing	B0041.2g.2	5 primer miss: exon 1 to 2	No extra exon.	9821ad67-16fd-46f3-9086-a9dc3ed3f1df
B0041.2_NP11	B0041.2	29.3389	20.1128	3.50591	5.72017	488.233	304.379	73.8455	110.009	0.0660782	0.0474763	0.0519975	5'extra	B0041.2a.1	5 primer miss: exon 1 to 2	5 primer extra: exon 1 to 1	e09b2293-54f6-4cf1-a5cf-51b96da0e713
B0041.2_NP12	B0041.2	119.003	79.3354	21.7129	17.9549	488.233	304.379	73.8455	110.009	0.260647	0.294031	0.163213	Extra_UTR	B0041.2c.2	No miss exon.	No extra exon.	eace7686-a1aa-4422-b6ab-0fa736a6358b
B0041.2_NP13	B0041.2	14.7545	10.1281	1.50045	3.12595	488.233	304.379	73.8455	110.009	0.0332745	0.0203188	0.0284155	5'missing	B0041.2g.2	5 primer miss: exon 1 to 4	No extra exon.	f6f1aaef-b0ed-481d-8ab7-8385ce27d019
B0041.3_NP1	B0041.3	6.23559	5.61203	0	0.623559	44.1798	29.2576	6.59937	8.32282	0.191814	0	0.0749216	3'missing	B0041.3.1	3 primer miss: exon 3 to 3	No extra exon.	121bcc31-5390-4b05-a46c-d55f7bf86443
B0041.3_NP1	B0041.3	34.0967	19.7981	6.59937	7.69926	44.1798	29.2576	6.59937	8.32282	0.676682	1	0.925078	Extra_UTR	B0041.3.1	No miss exon.	No extra exon.	ac520fa1-b5e7-4741-a2b9-dc972fc4ca88
B0041.4_NP1	B0041.4	143.696	21.5834	54.3207	67.7922	21493.4	2456.23	8092.71	10944.5	0.00878721	0.0067123	0.00619417	3'missing	B0041.4.1	3 primer miss: exon 4 to 4	No extra exon.	00227f5a-2949-48e8-9285-8303dbf854da
B0041.4_NP1	B0041.4	55.3153	8.10433	20.8397	26.3712	21493.4	2456.23	8092.71	10944.5	0.0032995	0.00257512	0.00240954	Missing_UTR	B0041.4.1	No miss exon.	No extra exon.	004b69e9-723f-4cc4-a346-24d1aa9a6e81
B0041.4_NP2	B0041.4	8.55506	1.40631	3.86736	3.28139	21493.4	2456.23	8092.71	10944.5	0.000572549	0.000477882	0.000299821	5'missing	B0041.4.1	5 primer miss: exon 1 to 1	No extra exon.	03716dd1-260d-45f9-9cec-b099e70ee3d1
B0041.4_NP3	B0041.4	14.4522	1.90539	4.85336	7.69348	21493.4	2456.23	8092.71	10944.5	0.000775739	0.00059972	0.000702953	5'extra	B0041.4.1	5 primer miss: exon 1 to 1	5 primer extra: exon 1 to 1	047bc164-fa4e-4e73-90cf-da67f3c0134f
B0041.4_NP4	B0041.4	797.143	122.143	500.294	174.706	21493.4	2456.23	8092.71	10944.5	0.0497278	0.0618203	0.0159629	Missing_UTR	B0041.4.1	No miss exon.	No extra exon.	08674b95-aaa7-424f-8f12-a3d4361d10ce
B0041.4_NP5	B0041.4	6.58315	1.12788	2.50896	2.9463	21493.4	2456.23	8092.71	10944.5	0.000459192	0.000310027	0.000269204	5'extra	B0041.4.1	5 primer miss: exon 1 to 1	5 primer extra: exon 1 to 1	0dc7e57b-1e9a-4901-984b-a7321f6c76eb
B0041.4_NP6	B0041.4	19.5633	3.95029	9.40544	6.20759	21493.4	2456.23	8092.71	10944.5	0.00160827	0.00116221	0.000567188	Missing_UTR	B0041.4.1	No miss exon.	No extra exon.	10d7c51e-bd9d-44ea-8235-eeaf22587690
B0041.4_NP7	B0041.4	7.96832	1.30222	2.38739	4.27871	21493.4	2456.23	8092.71	10944.5	0.000530168	0.000295006	0.000390946	3'extra	B0041.4.1	3 primer miss: exon 4 to 4	3 primer extra: exon 4 to 4	129cce8b-9753-4887-953f-5970f23c370c
B0041.4_NP8	B0041.4	5.99764	0.652374	1.87295	3.47232	21493.4	2456.23	8092.71	10944.5	0.0002656	0.000231436	0.000317266	Missing_exon	B0041.4.1	Exon miss: exon 2 to 3;3 primer miss: exon 4 to 4	No extra exon.	16b07ab3-a0ab-49e9-8b09-3a325a451291
B0041.4_NP9	B0041.4	5.31942	0.773391	1.71655	2.82948	21493.4	2456.23	8092.71	10944.5	0.000314869	0.000212111	0.00025853	New_junction	NA	NA	NA	1ca8f484-e777-42f6-b5a4-141f557bec5b
B0041.4_NP10	B0041.4	7.17199	0.910291	1.95851	4.3032	21493.4	2456.23	8092.71	10944.5	0.000370605	0.000242009	0.000393183	5'extra	B0041.4.1	5 primer miss: exon 1 to 1	5 primer extra: exon 1 to 1	1d676748-94b9-4440-a102-eb1592da9beb
B0041.4_NP11	B0041.4	99.4309	13.397	37.2604	48.7735	21493.4	2456.23	8092.71	10944.5	0.00545429	0.0046042	0.00445643	New_junction	NA	NA	NA	1e5e98f6-76ee-487c-b046-024fafd1a9a8
B0041.4_NP12	B0041.4	7.44025	1.32862	3.4544	2.65723	21493.4	2456.23	8092.71	10944.5	0.000540917	0.000426853	0.000242791	5'missing	B0041.4.1	5 primer miss: exon 1 to 1	No extra exon.	1ebe5dc1-4500-47f3-8406-0b1d69b9389f
B0041.4_NP13	B0041.4	22.0499	4.58462	10.6975	6.76778	21493.4	2456.23	8092.71	10944.5	0.00186653	0.00132186	0.000618372	Missing_UTR	B0041.4.1	No miss exon.	No extra exon.	2011ed7b-2092-4c8b-a891-c5768fe88205
B0041.4_NP14	B0041.4	19.8533	3.69363	8.54153	7.61812	21493.4	2456.23	8092.71	10944.5	0.00150378	0.00105546	0.000696068	New_junction	NA	NA	NA	203d0fbb-52c3-4fdb-93c4-1ccb041fa2b2
B0041.4_NP15	B0041.4	28.2896	5.02738	11.2477	12.0146	21493.4	2456.23	8092.71	10944.5	0.00204679	0.00138985	0.00109777	5'extra	B0041.4.1	5 primer miss: exon 1 to 1	5 primer extra: exon 1 to 1	21b8b277-8c47-49ce-9006-378842d7d376
B0041.4_NP16	B0041.4	28.0368	4.17292	8.47625	15.3877	21493.4	2456.23	8092.71	10944.5	0.00169891	0.00104739	0.00140597	Intron_retention	B0041.4.1	Intron retention: intron 2 to 2	No extra exon.	23692a3a-ef5f-42dd-8548-6f1b17399741
B0041.4_NP17	B0041.4	20.5945	4.15211	9.96507	6.4773	21493.4	2456.23	8092.71	10944.5	0.00169044	0.00123136	0.000591831	5'missing	B0041.4.1	5 primer miss: exon 1 to 1	No extra exon.	23dc754b-ea58-425d-b235-14f13b17d54a
B0041.4_NP18	B0041.4	5.64777	0.978575	1.53776	3.13144	21493.4	2456.23	8092.71	10944.5	0.000398405	0.000190018	0.00028612	New_junction	NA	NA	NA	24e41866-c19a-4af4-94cf-616421915ff2
B0041.4_NP19	B0041.4	12.1506	2.01291	4.3918	5.74594	21493.4	2456.23	8092.71	10944.5	0.000819511	0.000542686	0.000525007	5'extra	B0041.4.1	5 primer miss: exon 1 to 1	5 primer extra: exon 1 to 1	255d078c-f932-4e6b-864f-24c0af1096f2
B0041.4_NP20	B0041.4	17.4866	3.19647	7.52111	6.769	21493.4	2456.23	8092.71	10944.5	0.00130137	0.000929368	0.000618483	Missing_UTR	B0041.4.1	No miss exon.	No extra exon.	25dc8dd4-1280-4072-8bcf-298ba771a5bd
B0041.4_NP21	B0041.4	313.92	45.3917	106.79	161.738	21493.4	2456.23	8092.71	10944.5	0.0184802	0.0131958	0.014778	Extra_UTR	B0041.4.1	No miss exon.	No extra exon.	2772a732-69b1-465f-8331-a5132c87fe7b
B0041.4_NP22	B0041.4	31.6663	4.39302	11.8977	15.3756	21493.4	2456.23	8092.71	10944.5	0.00178852	0.00147018	0.00140486	5'missing	B0041.4.1	5 primer miss: exon 1 to 1	No extra exon.	2e1b7347-6339-4366-8356-2a2276d14d86
B0041.4_NP23	B0041.4	16.8782	2.47206	4.94413	9.46204	21493.4	2456.23	8092.71	10944.5	0.00100645	0.000610936	0.000864546	Missing_UTR	B0041.4.1	No miss exon.	No extra exon.	2f5918b7-6f71-4e9b-8b6e-7c1ca0b85c06
B0041.4_NP24	B0041.4	15.917	2.19396	4.68905	9.03395	21493.4	2456.23	8092.71	10944.5	0.000893222	0.000579416	0.000825432	New_junction	NA	NA	NA	2f8777f6-4d9a-4a30-a48b-ba5e2de96205
B0041.4_NP25	B0041.4	97.2702	12.9064	36.6206	47.7432	21493.4	2456.23	8092.71	10944.5	0.00525456	0.00452514	0.0043623	3'missing	B0041.4.1	3 primer miss: exon 4 to 4	No extra exon.	33ecb44c-3ae1-4b83-ac52-364234a3b256
B0041.4_NP26	B0041.4	9.40991	1.63156	4.05992	3.71843	21493.4	2456.23	8092.71	10944.5	0.000664252	0.000501676	0.000339753	3'missing	B0041.4.1	3 primer miss: exon 4 to 4	No extra exon.	360491af-a6b0-4915-a913-8b5523bbda30
B0041.4_NP27	B0041.4	6.96838	1.35748	2.44346	3.16745	21493.4	2456.23	8092.71	10944.5	0.000552667	0.000301933	0.00028941	New_junction	NA	NA	NA	3865520d-21ea-430d-a770-8cfda9990e45
B0041.4_NP28	B0041.4	5.83145	0.681046	1.68133	3.46908	21493.4	2456.23	8092.71	10944.5	0.000277273	0.000207759	0.00031697	5'extra	B0041.4.1	5 primer miss: exon 1 to 3	5 primer extra: exon 1 to 1	38d314cd-2e30-40db-ae65-478683bbd931
B0041.4_NP29	B0041.4	9.07879	1.46728	3.54592	4.06559	21493.4	2456.23	8092.71	10944.5	0.00059737	0.000438163	0.000371473	New_junction	NA	NA	NA	3a80d9dc-9dc8-4c2b-8da9-eeae10771b74
B0041.4_NP30	B0041.4	10.8586	1.77283	4.14715	4.93859	21493.4	2456.23	8092.71	10944.5	0.000721767	0.000512455	0.000451239	5'extra	B0041.4.1	5 primer miss: exon 1 to 1	5 primer extra: exon 1 to 1	3b4e7301-3a4d-4702-b22b-b687f9fa7fa7
B0041.4_NP31	B0041.4	8.12091	1.39534	3.12557	3.59999	21493.4	2456.23	8092.71	10944.5	0.000568084	0.000386221	0.000328931	5'extra	B0041.4.1	5 primer miss: exon 1 to 1	5 primer extra: exon 1 to 1	3d633448-9812-4fa0-a5cf-e10f5df9d205
B0041.4_NP32	B0041.4	14.8026	2.19976	5.77438	6.82843	21493.4	2456.23	8092.71	10944.5	0.000895585	0.000713528	0.000623914	3'missing	B0041.4.1	5 primer miss: exon 1 to 1;3 primer miss: exon 4 to 4	No extra exon.	3e4d0ac7-7444-49a7-9771-46e393466f27
B0041.4_NP33	B0041.4	14.1638	2.09987	4.77617	7.28778	21493.4	2456.23	8092.71	10944.5	0.000854915	0.000590182	0.000665884	New_junction	NA	NA	NA	4634ad64-3225-4700-af2b-639197f68f90
B0041.4_NP34	B0041.4	33.0144	4.01527	12.1573	16.8418	21493.4	2456.23	8092.71	10944.5	0.00163473	0.00150226	0.00153884	Missing_UTR	B0041.4.1	No miss exon.	No extra exon.	4840c843-7134-4f1b-9a28-984955f11fd8
B0041.4_NP35	B0041.4	5.75731	0.767642	2.09973	2.88995	21493.4	2456.23	8092.71	10944.5	0.000312528	0.000259459	0.000264054	5'missing	B0041.4.1	5 primer miss: exon 1 to 1	No extra exon.	485edce4-2b25-4a79-9bd6-d9b433fd6129
B0041.4_NP36	B0041.4	16.1078	3.33264	6.66528	6.10984	21493.4	2456.23	8092.71	10944.5	0.00135681	0.000823615	0.000558256	New_junction	NA	NA	NA	48f929cd-f98d-4175-9b82-c9fda5966f46
B0041.4_NP37	B0041.4	4677.62	460.489	1479.22	2737.92	21493.4	2456.23	8092.71	10944.5	0.187478	0.182784	0.250164	Missing_UTR	B0041.4.1	No miss exon.	No extra exon.	5070b148-36ba-41f6-8d58-9f59ad3a95df
B0041.4_NP38	B0041.4	39.6354	5.18202	14.0055	20.448	21493.4	2456.23	8092.71	10944.5	0.00210975	0.00173063	0.00186833	New_junction	NA	NA	NA	51f49752-e22d-446a-baa8-60fe80ac79fd
B0041.4_NP39	B0041.4	32.4324	5.02474	14.6174	12.7903	21493.4	2456.23	8092.71	10944.5	0.00204571	0.00180625	0.00116865	Missing_UTR	B0041.4.1	No miss exon.	No extra exon.	56900fd6-5f99-4caa-835b-d3a756af8c89
B0041.4_NP40	B0041.4	6.69082	0.842938	2.13369	3.71419	21493.4	2456.23	8092.71	10944.5	0.000343183	0.000263655	0.000339366	New_junction	NA	NA	NA	573864b6-24d8-4d85-8f0d-ab4421f133a9
B0041.4_NP41	B0041.4	35.0648	4.87486	13.1707	17.0192	21493.4	2456.23	8092.71	10944.5	0.00198469	0.00162747	0.00155505	Missing_UTR	B0041.4.1	No miss exon.	No extra exon.	5bc432c8-dd3f-4663-8b1c-c73877a0845e
B0041.4_NP42	B0041.4	48.4378	8.50933	26.8371	13.0913	21493.4	2456.23	8092.71	10944.5	0.00346439	0.00331621	0.00119615	New_junction	NA	NA	NA	5cd92e6e-db55-4dde-b613-80c3e40475ac
B0041.4_NP43	B0041.4	7.43141	1.31142	3.16928	2.95071	21493.4	2456.23	8092.71	10944.5	0.000533918	0.000391621	0.000269606	New_junction	NA	NA	NA	5f9a50b7-ac42-4d49-8465-ace910e14059
B0041.4_NP44	B0041.4	31.2486	3.73624	10.2464	17.266	21493.4	2456.23	8092.71	10944.5	0.00152113	0.00126612	0.00157759	3'missing	B0041.4.1	5 primer miss: exon 1 to 1;3 primer miss: exon 4 to 4	No extra exon.	5fe15b73-43f9-4098-bdb8-00de2116d902
B0041.4_NP45	B0041.4	654.258	99.7967	408.752	145.71	21493.4	2456.23	8092.71	10944.5	0.04063	0.0505087	0.0133135	Missing_UTR	B0041.4.1	No miss exon.	No extra exon.	62ae29e7-5ace-41df-9750-3d395ad8c71e
B0041.4_NP46	B0041.4	5.64939	1.07041	2.73549	1.84348	21493.4	2456.23	8092.71	10944.5	0.000435794	0.000338019	0.000168439	5'missing	B0041.4.1	5 primer miss: exon 1 to 1	No extra exon.	64427e29-4817-41b8-aa05-9576b4adf028
B0041.4_NP47	B0041.4	94.7697	11.5905	39.9987	43.1805	21493.4	2456.23	8092.71	10944.5	0.00471883	0.00494256	0.0039454	5'missing	B0041.4.1	5 primer miss: exon 1 to 2	No extra exon.	6627631c-5a42-4c53-b7cf-52c7fd66e4b8
B0041.4_NP48	B0041.4	117.569	16.0418	34.1943	67.3333	21493.4	2456.23	8092.71	10944.5	0.00653106	0.00422533	0.00615225	Missing_UTR	B0041.4.1	No miss exon.	No extra exon.	6698b056-d206-4d7c-8ced-14095507ae0c
B0041.4_NP49	B0041.4	16.4832	2.11989	5.75397	8.60933	21493.4	2456.23	8092.71	10944.5	0.000863065	0.000711007	0.000786635	5'extra	B0041.4.1	5 primer miss: exon 1 to 1	5 primer extra: exon 1 to 1	67d9cc77-801b-4625-bac8-be9939a5e9f6
B0041.4_NP50	B0041.4	10.7773	1.67959	4.16397	4.93378	21493.4	2456.23	8092.71	10944.5	0.000683806	0.000514534	0.0004508	New_junction	NA	NA	NA	718f57b0-ad5e-40f7-9941-d27470f0d515
B0041.4_NP51	B0041.4	9.9022	1.39342	3.40944	5.09934	21493.4	2456.23	8092.71	10944.5	0.000567302	0.000421298	0.000465927	5'missing	B0041.4.1	5 primer miss: exon 1 to 1	No extra exon.	72fefb76-9389-4953-982d-557fe42fb5df
B0041.4_NP52	B0041.4	45.1636	4.91099	15.3469	24.9058	21493.4	2456.23	8092.71	10944.5	0.0019994	0.00189638	0.00227564	5'missing	B0041.4.1	5 primer miss: exon 1 to 2	No extra exon.	744b6bbb-7e6f-4a23-a4d8-290772b12488
B0041.4_NP53	B0041.4	5.49756	0.599734	2.59885	2.29898	21493.4	2456.23	8092.71	10944.5	0.000244169	0.000321134	0.000210058	Missing_UTR	B0041.4.1	No miss exon.	No extra exon.	76cebd80-ace2-4285-b1ae-4de54891620c
B0041.4_NP54	B0041.4	13.6796	2.48721	4.76715	6.42529	21493.4	2456.23	8092.71	10944.5	0.00101261	0.000589067	0.000587079	New_junction	NA	NA	NA	7abd4a6d-bddf-44ee-b94e-16c1fdb10ada
B0041.4_NP55	B0041.4	239.578	42.1368	148.081	49.3602	21493.4	2456.23	8092.71	10944.5	0.0171551	0.018298	0.00451004	Missing_UTR	B0041.4.1	No miss exon.	No extra exon.	81064ea1-c66e-4c1b-8c31-f6a2dcc8eb04
B0041.4_NP56	B0041.4	74.4959	11.1211	27.7265	35.6483	21493.4	2456.23	8092.71	10944.5	0.00452769	0.00342611	0.00325719	New_junction	NA	NA	NA	848592cf-fc2f-4a8b-8b4d-5f751e4fc5e7
B0041.4_NP57	B0041.4	5.58982	0.701752	1.83908	3.04899	21493.4	2456.23	8092.71	10944.5	0.000285703	0.000227251	0.000278587	5'missing	B0041.4.1	5 primer miss: exon 1 to 2	No extra exon.	8d6efc42-c8eb-4509-8d1d-ec3080dcc5e9
B0041.4_NP58	B0041.4	72.446	11.4882	20.163	40.7948	21493.4	2456.23	8092.71	10944.5	0.00467717	0.0024915	0.00372742	Intron_retention	B0041.4.1	Intron retention: intron 2 to 2	No extra exon.	8e782018-a6bd-41c9-ab3f-80b8382fceec
B0041.4_NP59	B0041.4	7.96875	1.48354	2.75515	3.73005	21493.4	2456.23	8092.71	10944.5	0.000603992	0.000340449	0.000340815	New_junction	NA	NA	NA	90b16ac0-103f-4fd1-8ac9-0a83b006eb08
B0041.4_NP60	B0041.4	44.6186	6.66627	14.3931	23.5592	21493.4	2456.23	8092.71	10944.5	0.00271403	0.00177852	0.00215261	Intron_retention	B0041.4.1	Intron retention: intron 2 to 2	No extra exon.	94e9ed8d-b781-42ac-8075-8c4ec81ac723
B0041.4_NP61	B0041.4	6.56353	1.272	2.18784	3.10368	21493.4	2456.23	8092.71	10944.5	0.000517867	0.000270347	0.000283584	Missing_UTR	B0041.4.1	No miss exon.	No extra exon.	95fbc363-d990-4eaa-9787-a52fad5a80ed
B0041.4_NP62	B0041.4	10.391	1.41836	3.60757	5.3651	21493.4	2456.23	8092.71	10944.5	0.000577454	0.00044578	0.00049021	New_junction	NA	NA	NA	968ead47-4ed6-4ff2-8d05-4103df9ba7f5
B0041.4_NP63	B0041.4	57.2118	9.76232	24.7464	22.7031	21493.4	2456.23	8092.71	10944.5	0.00397451	0.00305786	0.00207438	Missing_UTR	B0041.4.1	No miss exon.	No extra exon.	97dc2915-7d35-4ae3-a235-52a0f3f7e253
B0041.4_NP64	B0041.4	28.2715	4.25592	12.1598	11.8558	21493.4	2456.23	8092.71	10944.5	0.0017327	0.00150256	0.00108326	3'extra	B0041.4.1	5 primer miss: exon 1 to 2	3 primer extra: exon 3 to 3	9d2908d7-c434-460d-8974-f0fe41a20a92
B0041.4_NP65	B0041.4	14.7164	2.04289	4.88023	7.79324	21493.4	2456.23	8092.71	10944.5	0.000831717	0.000603041	0.000712069	3'extra	B0041.4.1	3 primer miss: exon 4 to 4	3 primer extra: exon 4 to 4	9f74c0a0-113b-4a0c-9c84-cfbb7e98e5ef
B0041.4_NP66	B0041.4	29.9961	4.14693	10.9202	14.9289	21493.4	2456.23	8092.71	10944.5	0.00168833	0.00134939	0.00136406	5'missing	B0041.4.1	5 primer miss: exon 1 to 1	No extra exon.	a0602e69-2496-4382-b17d-a16f9eca2a45
B0041.4_NP67	B0041.4	274.128	41.9666	78.5528	153.608	21493.4	2456.23	8092.71	10944.5	0.0170858	0.00970661	0.0140352	Extra_UTR	B0041.4.1	No miss exon.	No extra exon.	a2eff070-2c75-47f9-b18f-37b9123960d2
B0041.4_NP68	B0041.4	10.2536	1.40621	3.33975	5.50766	21493.4	2456.23	8092.71	10944.5	0.000572507	0.000412686	0.000503235	New_junction	NA	NA	NA	aacd50e9-fd93-4f91-b458-6b338b1e492a
B0041.4_NP69	B0041.4	19.2917	2.93234	6.37912	9.98024	21493.4	2456.23	8092.71	10944.5	0.00119384	0.000788256	0.000911895	New_junction	NA	NA	NA	ad5bf288-0771-46de-82b3-54699f5fda29
B0041.4_NP70	B0041.4	8.24107	1.1987	2.79697	4.2454	21493.4	2456.23	8092.71	10944.5	0.000488025	0.000345616	0.000387902	5'extra	B0041.4.1	5 primer miss: exon 1 to 1	5 primer extra: exon 1 to 1	af1027c3-f2aa-41da-bad9-4593004360cc
B0041.4_NP71	B0041.4	10.5294	1.91443	4.64934	3.96561	21493.4	2456.23	8092.71	10944.5	0.000779419	0.000574509	0.000362338	New_junction	NA	NA	NA	afb78a1d-9e26-4e40-ae50-942156c38656
B0041.4_NP72	B0041.4	26.4163	4.39053	9.29328	12.7325	21493.4	2456.23	8092.71	10944.5	0.0017875	0.00114835	0.00116337	Missing_UTR	B0041.4.1	No miss exon.	No extra exon.	b18d1cc5-6591-41ea-8f8a-2f641bd55345
B0041.4_NP73	B0041.4	6.47773	0.916463	2.43696	3.12431	21493.4	2456.23	8092.71	10944.5	0.000373118	0.00030113	0.000285468	5'extra	B0041.4.1	5 primer miss: exon 1 to 1	5 primer extra: exon 1 to 1	b30d8b60-f256-45f9-ba4f-681e709afbb0
B0041.4_NP74	B0041.4	21.5926	3.85583	7.71165	10.0251	21493.4	2456.23	8092.71	10944.5	0.00156982	0.000952914	0.000915998	Missing_UTR	B0041.4.1	No miss exon.	No extra exon.	b3bf2753-b544-43be-8983-95d906e57cfe
B0041.4_NP75	B0041.4	174.499	24.4003	78.007	72.0918	21493.4	2456.23	8092.71	10944.5	0.00993404	0.00963917	0.00658703	5'missing	B0041.4.1	5 primer miss: exon 1 to 1	No extra exon.	b4cc5742-1494-4094-9ef9-1fd08c7af130
B0041.4_NP76	B0041.4	11.7303	2.03024	4.96282	4.73724	21493.4	2456.23	8092.71	10944.5	0.000826569	0.000613246	0.000432841	New_junction	NA	NA	NA	b62252c0-c9d7-4e65-be37-4f9c5a582c71
B0041.4_NP77	B0041.4	7.92419	1.2614	2.58749	4.0753	21493.4	2456.23	8092.71	10944.5	0.000513552	0.000319731	0.00037236	5'missing	B0041.4.1	5 primer miss: exon 1 to 1	No extra exon.	b7b4bdab-dca8-4e8b-b582-974db2a9b0b1
B0041.4_NP78	B0041.4	25.7695	4.65513	11.721	9.39339	21493.4	2456.23	8092.71	10944.5	0.00189523	0.00144834	0.000858274	3'missing	B0041.4.1	3 primer miss: exon 3 to 4	No extra exon.	b8a23770-a72e-49e4-b9fd-c515292cff15
B0041.4_NP79	B0041.4	7.19627	1.24235	2.62535	3.32857	21493.4	2456.23	8092.71	10944.5	0.000505796	0.000324409	0.000304131	New_junction	NA	NA	NA	b957288b-a60d-451a-bec7-cdd24febc620
B0041.4_NP80	B0041.4	20.2247	3.25039	7.9454	9.02887	21493.4	2456.23	8092.71	10944.5	0.00132333	0.000981798	0.000824968	Missing_UTR	B0041.4.1	No miss exon.	No extra exon.	ba9ffaf7-6ed2-4803-9142-454df036a2fa
B0041.4_NP81	B0041.4	5897.38	616.269	2040.2	3240.92	21493.4	2456.23	8092.71	10944.5	0.2509	0.252103	0.296123	Missing_UTR	B0041.4.1	No miss exon.	No extra exon.	baa9efc8-88cb-4a38-b31c-8f80729865ef
B0041.4_NP82	B0041.4	25.2242	2.98104	13.5293	8.71381	21493.4	2456.23	8092.71	10944.5	0.00121367	0.00167179	0.000796181	5'missing	B0041.4.1	5 primer miss: exon 1 to 2	No extra exon.	be81d393-2670-4649-88f5-c6cc03c4c804
B0041.4_NP83	B0041.4	13.7161	2.4493	6.36819	4.8986	21493.4	2456.23	8092.71	10944.5	0.000997179	0.000786904	0.000447586	Intron_retention	B0041.4.1	Intron retention: intron 2 to 2	No extra exon.	c095c131-4d88-4ef7-b9ec-e230028d80c9
B0041.4_NP84	B0041.4	3857.51	330.812	1121.06	2405.64	21493.4	2456.23	8092.71	10944.5	0.134683	0.138527	0.219803	Missing_UTR	B0041.4.1	No miss exon.	No extra exon.	c56c3f3f-a1ad-4123-a102-5c66998c40d4
B0041.4_NP85	B0041.4	5.94071	1.18814	3.01279	1.73978	21493.4	2456.23	8092.71	10944.5	0.000483726	0.000372284	0.000158964	5'extra	B0041.4.1	5 primer miss: exon 1 to 1	5 primer extra: exon 1 to 1	c7de775e-6f0e-4677-89a1-c3d073b9deab
B0041.4_NP86	B0041.4	13.6342	1.61906	3.87721	8.13788	21493.4	2456.23	8092.71	10944.5	0.000659163	0.000479099	0.000743559	Missing_exon	B0041.4.1	Exon miss: exon 3 to 3	No extra exon.	c8c51ec0-95a0-41cd-8300-1fac56da3c31
B0041.4_NP87	B0041.4	156.15	26.3385	98.9576	30.8537	21493.4	2456.23	8092.71	10944.5	0.0107231	0.012228	0.0028191	Missing_UTR	B0041.4.1	No miss exon.	No extra exon.	cc2cb269-0066-41be-967c-d8352949e607
B0041.4_NP88	B0041.4	26.4536	3.71922	9.74332	12.9911	21493.4	2456.23	8092.71	10944.5	0.0015142	0.00120396	0.001187	Missing_UTR	B0041.4.1	No miss exon.	No extra exon.	cc74f895-5898-49c7-8058-742ed0b940ac
B0041.4_NP89	B0041.4	297.366	51.877	187.591	57.8985	21493.4	2456.23	8092.71	10944.5	0.0211206	0.0231802	0.00529018	Missing_UTR	B0041.4.1	No miss exon.	No extra exon.	ceb9e29c-6c3f-4c15-917f-1dfd90889a2b
B0041.4_NP90	B0041.4	120.107	18.0161	74.2481	27.843	21493.4	2456.23	8092.71	10944.5	0.00733485	0.00917469	0.00254402	Missing_UTR	B0041.4.1	No miss exon.	No extra exon.	d0bacd7c-36d2-421b-9789-edfd0fd4817c
B0041.4_NP91	B0041.4	7.52209	1.07111	2.55605	3.89493	21493.4	2456.23	8092.71	10944.5	0.000436077	0.000315846	0.00035588	New_junction	NA	NA	NA	d5348d3a-482e-4d7f-bb73-d0bbdf0337cb
B0041.4_NP92	B0041.4	28.5642	4.93867	13.6147	10.0108	21493.4	2456.23	8092.71	10944.5	0.00201067	0.00168234	0.000914689	3'missing	B0041.4.1	3 primer miss: exon 4 to 4	No extra exon.	d6d68c3b-cf2c-47b6-a867-ed5668188f1f
B0041.4_NP93	B0041.4	18.1651	2.25498	5.80448	10.1056	21493.4	2456.23	8092.71	10944.5	0.000918065	0.000717248	0.000923353	5'extra	B0041.4.1	No miss exon.	5 primer extra: exon 1 to 1	d7dbb752-bb8f-4405-b8d1-c878e92b2664
B0041.4_NP94	B0041.4	7.11379	0.805334	2.95289	3.35556	21493.4	2456.23	8092.71	10944.5	0.000327874	0.000364883	0.000306598	Missing_UTR	B0041.4.1	No miss exon.	No extra exon.	dc2cdd81-a693-4009-b003-0281ef7d086d
B0041.4_NP95	B0041.4	61.4519	9.65673	22.3861	29.4091	21493.4	2456.23	8092.71	10944.5	0.00393152	0.0027662	0.00268711	5'extra	B0041.4.1	5 primer miss: exon 1 to 1	5 primer extra: exon 1 to 1	dd9ceba8-c528-460b-b9e1-d1e740cc09d6
B0041.4_NP96	B0041.4	33.0714	4.33078	12.3033	16.4373	21493.4	2456.23	8092.71	10944.5	0.00176318	0.0015203	0.00150187	5'missing	B0041.4.1	5 primer miss: exon 1 to 2	No extra exon.	e1d5523a-67f8-4e51-a375-a3b53ac3c89f
B0041.4_NP97	B0041.4	6.04453	1.05632	2.17133	2.81687	21493.4	2456.23	8092.71	10944.5	0.000430059	0.000268307	0.000257377	New_junction	NA	NA	NA	e2c1b815-9320-4c17-82c0-6b0991806e8f
B0041.4_NP98	B0041.4	30.0107	4.66075	10.2878	15.0622	21493.4	2456.23	8092.71	10944.5	0.00189752	0.00127124	0.00137623	5'extra	B0041.4.1	No miss exon.	5 primer extra: exon 1 to 1	e6e34af8-d779-415c-883f-cab922f092fd
B0041.4_NP99	B0041.4	31.8682	4.4705	11.9426	15.4551	21493.4	2456.23	8092.71	10944.5	0.00182006	0.00147572	0.00141214	5'missing	B0041.4.1	5 primer miss: exon 1 to 1	No extra exon.	ec9b1216-4141-42cd-b64c-e756cc96c8b6
B0041.4_NP100	B0041.4	40.3485	6.06394	23.6727	10.6119	21493.4	2456.23	8092.71	10944.5	0.0024688	0.00292519	0.000969609	3'missing	B0041.4.1	3 primer miss: exon 4 to 4	No extra exon.	ef3c8eb2-bd38-4150-b0c6-4e06250d63b6
B0041.4_NP101	B0041.4	14.5597	2.16995	5.70488	6.68486	21493.4	2456.23	8092.71	10944.5	0.000883449	0.000704941	0.000610796	3'extra	B0041.4.1	5 primer miss: exon 1 to 1	3 primer extra: exon 4 to 4	f0d8a324-31c9-45d5-8c3f-1de92301c119
B0041.4_NP102	B0041.4	13.6158	2.91768	4.46233	6.23582	21493.4	2456.23	8092.71	10944.5	0.00118787	0.000551402	0.000569767	Intron_retention	B0041.4.1	Intron retention: intron 2 to 2	No extra exon.	f2805aa1-8885-42fe-8178-c144438e75ae
B0041.4_NP103	B0041.4	539.987	47.7979	211.43	280.759	21493.4	2456.23	8092.71	10944.5	0.0194598	0.026126	0.0256529	Missing_UTR	B0041.4.1	No miss exon.	No extra exon.	f2f36d00-120a-4d1e-834c-89d4e0402b97
B0041.4_NP104	B0041.4	861.562	128.571	559.794	173.196	21493.4	2456.23	8092.71	10944.5	0.052345	0.0691726	0.0158249	Missing_UTR	B0041.4.1	No miss exon.	No extra exon.	f8cee161-11c0-449f-9b75-3285836ac7da
B0041.4_NP105	B0041.4	30.0572	5.43588	12.1508	12.4705	21493.4	2456.23	8092.71	10944.5	0.0022131	0.00150145	0.00113943	Missing_UTR	B0041.4.1	No miss exon.	No extra exon.	fbaeff47-9ec8-4c82-a7ea-ec216b708299
B0041.4_NP106	B0041.4	14.8215	1.74108	4.73217	8.34827	21493.4	2456.23	8092.71	10944.5	0.000708844	0.000584745	0.000762782	Missing_UTR	B0041.4.1	No miss exon.	No extra exon.	fc74f2e5-edfc-4ae7-ba14-36fe448b7ae2
B0041.4_NP107	B0041.4	12.0952	1.75743	4.13513	6.20269	21493.4	2456.23	8092.71	10944.5	0.000715498	0.000510969	0.00056674	New_junction	NA	NA	NA	fd84524f-d1d1-4fd7-be4f-ab79a5277640
B0041.5_NP1	B0041.5	5.36362	1.219	1.70661	2.43801	234.962	65.6688	54.0184	115.275	0.0185629	0.0315931	0.0211495	5'missing	B0041.5a.1	5 primer miss: exon 1 to 1	No extra exon.	140e30c7-459d-41bd-bbfb-892f1b152e5e
B0041.5_NP1	B0041.5	14.24	5.05291	4.1342	5.05291	234.962	65.6688	54.0184	115.275	0.0769454	0.0765331	0.0438334	Intron_retention	B0041.5a.1	Intron retention: intron 4 to 4	No extra exon.	1eadf7d6-4539-48a5-9f15-c56e4eeac08c
B0041.5_NP2	B0041.5	151.311	40.0823	30.0618	81.1667	234.962	65.6688	54.0184	115.275	0.610371	0.556509	0.704113	Extra_UTR	B0041.5a.1	No miss exon.	No extra exon.	54a879cf-a980-4c0e-adf4-d84a022afb07
B0041.5_NP3	B0041.5	15.314	4.64061	4.17655	6.49686	234.962	65.6688	54.0184	115.275	0.070667	0.0773172	0.0563596	5'missing	B0041.5a.1	5 primer miss: exon 1 to 1	No extra exon.	ff42d7f5-1c6a-44d5-a125-12fede4affb8
B0041.6_NP1	B0041.6	58.1546	24.9234	15.4288	17.8024	130.24	55.1158	35.7351	39.3889	0.452201	0.431754	0.451965	Extra_UTR	B0041.6a.1	No miss exon.	No extra exon.	8b316313-d8f4-4589-820f-567f156a3ba8
B0041.7_NP1	B0041.7	23.7971	14.8438	5.18353	3.76984	188.478	112.509	44.473	31.4961	0.131934	0.116555	0.119692	5'extra	B0041.7.2	5 primer miss: exon 1 to 3	5 primer extra: exon 1 to 1	25398a1f-617f-4788-a1ba-85ff04f0bd34
B0041.7_NP1	B0041.7	77.9716	45.9285	17.0897	14.9535	188.478	112.509	44.473	31.4961	0.40822	0.384271	0.474772	5'missing	B0041.7.2	5 primer miss: exon 1 to 1	No extra exon.	6f88c20b-b0dc-436f-99bd-7b9f0ef41f6c
B0041.7_NP2	B0041.7	22.1608	13.6737	5.18658	3.30055	188.478	112.509	44.473	31.4961	0.121534	0.116623	0.104792	5'extra	B0041.7.2	5 primer miss: exon 1 to 3	5 primer extra: exon 1 to 1	8dbff1ce-7071-4650-add4-b9d0970119d4
B0041.7_NP3	B0041.7	10.3088	5.78739	2.53198	1.98942	188.478	112.509	44.473	31.4961	0.0514393	0.0569331	0.0631639	3'missing	B0041.7.2	3 primer miss: exon 10 to 10	No extra exon.	d0189ce1-e196-4fb4-ab78-8038c4ec9550
B0041.7_NP4	B0041.7	23.7087	14.4314	5.41176	3.86555	188.478	112.509	44.473	31.4961	0.128268	0.121687	0.122731	5'missing	B0041.7.2	5 primer miss: exon 1 to 3	No extra exon.	e2a3f837-6584-4927-a398-f04f71298c14
B0041.7_NP5	B0041.7	10.751	5.93161	2.78044	2.03899	188.478	112.509	44.473	31.4961	0.0527211	0.0625198	0.0647379	3'missing	B0041.7.2	5 primer miss: exon 1 to 2;3 primer miss: exon 10 to 10	No extra exon.	f79a76cd-adfe-407c-ab83-b36850cd2106
B0041.8_NP1	B0041.8	9.39442	5.97826	0.427019	2.98913	610.102	241.279	41.6389	327.184	0.0247774	0.0102553	0.00913594	Missing_UTR	B0041.8.1	No miss exon.	No extra exon.	03d1285d-7d95-4c65-ad31-bfa5fbd129e7
B0041.8_NP1	B0041.8	7.79866	4.15929	0.259955	3.37942	610.102	241.279	41.6389	327.184	0.0172385	0.00624309	0.0103288	3'missing	B0041.8.1	3 primer miss: exon 3 to 3	No extra exon.	077c75ac-380c-4ec3-96e4-4a5a6090e7dd
B0041.8_NP2	B0041.8	5.16102	1.93538	0.430085	2.79555	610.102	241.279	41.6389	327.184	0.00802133	0.0103289	0.00854428	Missing_UTR	B0041.8.1	No miss exon.	No extra exon.	4f83f3f0-ba7b-4304-b51a-c5fc04962dbc
B0041.8_NP3	B0041.8	6.42767	2.14256	1.07128	3.21384	610.102	241.279	41.6389	327.184	0.00887999	0.0257278	0.00982272	3'missing	B0041.8.1	3 primer miss: exon 3 to 3	No extra exon.	57ac27fa-f8f1-4771-a16a-0ee781dcffcb
B0041.8_NP4	B0041.8	7.56486	2.52162	1.26081	3.78243	610.102	241.279	41.6389	327.184	0.010451	0.0302796	0.0115606	3'missing	B0041.8.1	3 primer miss: exon 3 to 3	No extra exon.	5ce4646d-4f96-4594-a80e-bfc8ac63b811
B0041.8_NP5	B0041.8	29.9186	11.6154	2.46388	15.8392	610.102	241.279	41.6389	327.184	0.0481411	0.0591726	0.0484108	3'extra	B0041.8.1	No miss exon.	3 primer extra: exon 4 to 4	5d03a17b-650c-4e52-adc5-7c22bd478f32
B0041.8_NP6	B0041.8	7.59334	2.53111	0.843704	4.21852	610.102	241.279	41.6389	327.184	0.0104904	0.0202624	0.0128934	5'missing	B0041.8.1	5 primer miss: exon 1 to 1	No extra exon.	5dd5b789-3fdd-4d30-880f-5a0dd1a772c9
B0041.8_NP7	B0041.8	179.964	75.7167	14.2655	89.9822	610.102	241.279	41.6389	327.184	0.313814	0.3426	0.27502	Missing_UTR	B0041.8.1	No miss exon.	No extra exon.	5ded800b-1490-4f38-86e8-55b89abb6a16
B0041.8_NP8	B0041.8	8.81003	6.09925	0.338847	2.37193	610.102	241.279	41.6389	327.184	0.0252788	0.00813775	0.00724953	3'missing	B0041.8.1	5 primer miss: exon 1 to 2;3 primer miss: exon 2 to 3	No extra exon.	7a2fca88-7047-4de6-8085-1e469b08775f
B0041.8_NP9	B0041.8	131.252	49.2754	7.61528	74.361	610.102	241.279	41.6389	327.184	0.204225	0.182889	0.227276	Extra_UTR	B0041.8.1	No miss exon.	No extra exon.	b88bcf77-2357-4c52-9f1a-9836a20f56eb
B0041.8_NP10	B0041.8	6.09288	2.82884	0.217603	3.04644	610.102	241.279	41.6389	327.184	0.0117243	0.00522595	0.0093111	5'missing	B0041.8.1	5 primer miss: exon 1 to 1	No extra exon.	c448a3d1-eef2-46de-bd94-131546497ad8
B0041.8_NP11	B0041.8	133.171	48.5518	7.86077	76.7581	610.102	241.279	41.6389	327.184	0.201227	0.188784	0.234602	Missing_UTR	B0041.8.1	No miss exon.	No extra exon.	ea57f11c-a296-4cf1-bf67-f4d44d5970c3
B0198.1_NP1	B0198.1	28.4582	22.467	4.49339	1.4978	53.1352	43.4292	7.67752	2.02849	0.517325	0.585266	0.738382	Extra_UTR	B0198.1.1	No miss exon.	No extra exon.	565c29d3-94d6-40af-9fd9-5a6508825666
B0198.1_NP1	B0198.1	9.55239	8.49101	0.530688	0.530688	53.1352	43.4292	7.67752	2.02849	0.195514	0.0691223	0.261618	Intron_retention	B0198.1.1	Intron retention: intron 2 to 2	No extra exon.	e832e6b0-fb57-4305-aec1-2a94af70b699
B0198.2_NP1	B0198.2	6.63361	0	3.98016	2.65344	6.63361	0	3.98016	2.65344	NA	1	1	Extra_UTR	B0198.2b.1	No miss exon.	No extra exon.	54ec4173-d5ea-43ad-a379-ef9b61289391
B0198.3_NP1	B0198.3	7.56231	6.30192	0	1.26038	17.0263	13.1419	0	3.88434	0.479529	NA	0.324478	Extra_UTR	B0198.3a.1	No miss exon.	No extra exon.	38475651-d527-484b-90f4-a6ccacafa863
B0205.1_NP1	B0205.1	5.12302	2.19558	0.585487	2.34195	149.175	67.8825	10.8932	70.3989	0.0323438	0.0537481	0.0332668	5'missing	B0205.1b.1	5 primer miss: exon 1 to 2	No extra exon.	07277719-d545-4ca0-96a1-829e22b0862a
B0205.1_NP1	B0205.1	15.1176	7.71965	0.964956	6.43304	149.175	67.8825	10.8932	70.3989	0.113721	0.0885836	0.0913798	Extra_UTR	B0205.1a.1	No miss exon.	No extra exon.	842de03d-faf7-45fc-81ae-a013e325a91b
B0205.1_NP2	B0205.1	8.70516	3.82178	0.636963	4.24642	149.175	67.8825	10.8932	70.3989	0.0562999	0.0584736	0.0603194	New_junction	NA	NA	NA	8abe8db2-171d-438e-9930-019d6b4c8238
B0205.1_NP3	B0205.1	49.6345	20.305	2.82014	26.5093	149.175	67.8825	10.8932	70.3989	0.29912	0.258891	0.376559	Extra_UTR	B0205.1b.1	No miss exon.	No extra exon.	9f639584-a923-4451-9a0b-14fe41c7bb3b
B0205.10_NP1	B0205.10	69.6971	0	9.95673	59.7404	78.0112	0	11.9041	66.1071	NA	0.836414	0.90369	Extra_UTR	B0205.10.1	No miss exon.	No extra exon.	74043087-da1e-4c89-adc3-4298f426e5d9
B0205.11_NP1	B0205.11	16.2921	5.30441	3.03109	7.95662	622.121	175.06	115.055	332.006	0.0303006	0.0263447	0.0239653	3'missing	B0205.11.1	3 primer miss: exon 5 to 5	No extra exon.	28316205-549c-4339-b7bc-7aa5f4a43f07
B0205.11_NP1	B0205.11	10.0723	2.747	1.83133	5.494	622.121	175.06	115.055	332.006	0.0156918	0.015917	0.0165479	5'missing	B0205.11.1	5 primer miss: exon 1 to 2	No extra exon.	28f9ea05-54fc-4b34-b2a5-faa6b4e9dbdb
B0205.11_NP2	B0205.11	6.74842	2.24947	1.79958	2.69937	622.121	175.06	115.055	332.006	0.0128497	0.015641	0.00813049	5'missing	B0205.11.1	5 primer miss: exon 1 to 3	No extra exon.	632bc49f-cc03-45d9-8b3a-ce1b07d90bd0
B0205.11_NP3	B0205.11	13.4839	5.33085	2.19505	5.958	622.121	175.06	115.055	332.006	0.0304516	0.0190782	0.0179455	3'missing	B0205.11.1	5 primer miss: exon 1 to 1;3 primer miss: exon 5 to 5	No extra exon.	84d1e8d9-0758-4c39-b5cd-2e641d97ec6e
B0205.11_NP4	B0205.11	77.3292	23.7936	21.1499	32.3857	622.121	175.06	115.055	332.006	0.135917	0.183823	0.0975457	5'missing	B0205.11.1	5 primer miss: exon 1 to 1	No extra exon.	ca50b95e-8ff2-4a9e-bf56-ddc32380bdc7
B0205.11_NP5	B0205.11	90.6548	28.2561	21.192	41.2067	622.121	175.06	115.055	332.006	0.161408	0.18419	0.124115	5'missing	B0205.11.1	5 primer miss: exon 1 to 1	No extra exon.	e98e3261-645c-4e58-bdd3-277133598123
B0205.11_NP6	B0205.11	18.3928	5.68504	2.67531	10.0324	622.121	175.06	115.055	332.006	0.0324748	0.0232524	0.0302176	5'missing	B0205.11.1	5 primer miss: exon 1 to 1	No extra exon.	ec3eca24-6d68-4ee1-be51-4a459395ac80
B0205.12_NP1	B0205.12	21.8593	6.07203	1.21441	14.5729	89.5537	32.4104	8.93255	47.8317	0.187348	0.135953	0.30467	Extra_UTR	B0205.12.1	No miss exon.	No extra exon.	2ffe49d8-f5e2-4a97-a1a3-481c927a5bdd
B0205.12_NP1	B0205.12	46.4036	17.2876	6.36913	22.7469	89.5537	32.4104	8.93255	47.8317	0.533398	0.713024	0.475561	Extra_UTR	B0205.12.1	No miss exon.	No extra exon.	d70a6404-da1e-41d3-9b53-de55ff16094e
B0205.13_NP1	B0205.13	77.659	7.65652	18.5944	51.4081	86.8544	8.89304	22.6014	55.36	0.860956	0.822711	0.928614	Missing_UTR	B0205.13.1	No miss exon.	No extra exon.	3d9ad4c7-1c40-46e9-9e17-183493f263c2
B0205.14_NP1	B0205.14	5.30688	0	2.12275	3.18413	6.63361	0	2.78611	3.84749	NA	0.761905	0.827586	Extra_UTR	B0205.14.1	No miss exon.	No extra exon.	cfdef621-ed18-413d-9695-2a1121ceb04d
B0205.3_NP1	B0205.3	17.3785	7.65483	1.6551	8.06861	759.925	221.701	96.485	441.739	0.0345277	0.0171539	0.0182656	5'missing	B0205.3.2	5 primer miss: exon 1 to 1	No extra exon.	108a7051-93e8-4819-b01f-3a2f8c623621
B0205.3_NP1	B0205.3	13.6637	5.81101	1.25643	6.59628	759.925	221.701	96.485	441.739	0.026211	0.0130221	0.0149325	5'missing	B0205.3.2	5 primer miss: exon 1 to 1	No extra exon.	18a2f8d6-6f69-4719-96c5-21ac1b0a6269
B0205.3_NP2	B0205.3	6.12803	3.37042	0.612803	2.14481	759.925	221.701	96.485	441.739	0.0152025	0.00635127	0.00485538	3'missing	B0205.3.2	3 primer miss: exon 4 to 4	No extra exon.	2766b8b2-f5b5-4644-bc63-ebb792a2304a
B0205.3_NP3	B0205.3	11.0103	4.47292	1.37628	5.16107	759.925	221.701	96.485	441.739	0.0201754	0.0142642	0.0116835	3'missing	B0205.3.2	5 primer miss: exon 1 to 1;3 primer miss: exon 4 to 4	No extra exon.	9130d264-70aa-445a-bffd-14f0076fae42
B0205.3_NP4	B0205.3	168.492	62.7123	29.4672	76.3125	759.925	221.701	96.485	441.739	0.282868	0.305407	0.172755	5'missing	B0205.3.2	5 primer miss: exon 1 to 1	No extra exon.	a1a8adbb-00e8-4728-a944-304bce7d7c11
B0205.3_NP5	B0205.3	40.3177	19.0593	8.06355	13.1949	759.925	221.701	96.485	441.739	0.0859683	0.083573	0.0298704	Extra_UTR	B0205.3.2	No miss exon.	No extra exon.	af0b4541-101a-4cba-89ac-71679c2f0141
B0205.3_NP6	B0205.3	6.94204	2.85849	1.02089	3.06267	759.925	221.701	96.485	441.739	0.0128934	0.0105808	0.0069332	3'missing	B0205.3.2	5 primer miss: exon 1 to 1;3 primer miss: exon 4 to 4	No extra exon.	af348655-7af5-4141-893d-23f370426ab0
B0205.3_NP7	B0205.3	11.4791	5.73957	1.91319	3.82638	759.925	221.701	96.485	441.739	0.0258887	0.0198289	0.00866208	3'extra	B0205.3.2	No miss exon.	3 primer extra: exon 5 to 5	de943271-8301-4fb1-b691-c7e044f05c66
B0205.3_NP8	B0205.3	195.579	49.4321	21.9221	124.225	759.925	221.701	96.485	441.739	0.222967	0.227207	0.281218	Extra_UTR	B0205.3.2	No miss exon.	No extra exon.	e89ed6d4-4657-487c-98cc-793ca3482d89
B0205.4_NP1	B0205.4	5.12262	5.12262	0	0	17.8297	16.7472	1.08251	0	0.30588	0	NA	Intron_retention	B0205.4.1	5 primer miss: exon 1 to 1;Intron retention: intron 7 to 7	No extra exon.	e09df416-de60-43db-8114-c32ed8d96918
B0205.4_NP1	B0205.4	5.38796	5.38796	0	0	17.8297	16.7472	1.08251	0	0.321724	0	NA	Intron_retention	B0205.4.1	5 primer miss: exon 1 to 1;Intron retention: intron 3 to 3	No extra exon.	e1102d6b-1bcd-46f0-9d94-a0e3aadc3731
B0205.6_NP1	B0205.6	11.5413	4.72146	2.62303	4.19685	146.327	50.6606	34.6884	60.9784	0.0931978	0.075617	0.0688252	Intron_retention	B0205.6.1	Intron retention: intron 4 to 4	No extra exon.	214add44-7c96-4ce1-b993-b64afea23d8c
B0205.6_NP1	B0205.6	61.9567	20.1158	13.6788	28.1622	146.327	50.6606	34.6884	60.9784	0.39707	0.394332	0.461838	Extra_UTR	B0205.6.1	No miss exon.	No extra exon.	8d5a23b5-0717-49ed-8a9b-32b1ec0bf52c
B0205.6_NP2	B0205.6	23.5482	9.41927	4.03683	10.0921	146.327	50.6606	34.6884	60.9784	0.185929	0.116374	0.165502	Intron_retention	B0205.6.1	Intron retention: intron 2 to 2	No extra exon.	a1eccd1c-e10b-4e7e-86b8-50e9e2f4573f
B0205.7_NP1	B0205.7	18.5741	13.2672	2.65344	2.65344	22.5543	15.9207	3.98016	2.65344	0.833333	0.666667	1	Extra_UTR	B0205.7.1	No miss exon.	No extra exon.	ea066a75-886f-4920-aebf-ef1805bc33d8
B0205.8_NP1	B0205.8	34.3178	13.7271	8.82459	11.7661	316.932	101.52	53.086	162.326	0.135216	0.166232	0.0724846	5'missing	B0205.8.2	5 primer miss: exon 1 to 1	No extra exon.	1f4eddb4-e5de-42c3-8d79-0b0eb0e94792
B0205.8_NP1	B0205.8	5.57223	2.14316	1.2859	2.14316	316.932	101.52	53.086	162.326	0.0211108	0.024223	0.0132029	5'missing	B0205.8.2	5 primer miss: exon 1 to 2	No extra exon.	2cacec71-78d0-4261-b461-5d3fd8cb40b1
B0205.8_NP2	B0205.8	90.5487	30.6945	16.1146	43.7396	316.932	101.52	53.086	162.326	0.30235	0.303557	0.269456	Extra_UTR	B0205.8.2	No miss exon.	No extra exon.	4daa087b-9b45-40bb-b598-d5410da7743a
B0205.8_NP3	B0205.8	5.19632	2.30948	1.73211	1.15474	316.932	101.52	53.086	162.326	0.022749	0.0326284	0.00711371	Missing_UTR	B0205.8.2	No miss exon.	No extra exon.	6052c16e-b6ac-4237-b6f7-c70778ff91e8
B0205.8_NP4	B0205.8	169.975	47.9185	21.6989	100.358	316.932	101.52	53.086	162.326	0.472011	0.408751	0.618248	Extra_UTR	B0205.8.2	No miss exon.	No extra exon.	77f0ffd7-68de-4909-9fed-fba7e4e07ef1
B0205.8_NP5	B0205.8	8.84481	3.93103	2.45689	2.45689	316.932	101.52	53.086	162.326	0.0387217	0.0462814	0.0151356	3'missing	B0205.8.2	3 primer miss: exon 4 to 4	No extra exon.	d3e57019-5025-4672-a219-d8dcb4641597
B0205.9_NP1	B0205.9	8.73425	5.37492	0.671865	2.68746	196.566	101.784	19.0118	75.7703	0.0528073	0.0353395	0.0354685	3'missing	B0205.9.1	3 primer miss: exon 6 to 7	No extra exon.	2f730f3f-1350-4c21-abce-1eb68b54ac14
B0205.9_NP1	B0205.9	14.206	8.52358	0.947064	4.73532	196.566	101.784	19.0118	75.7703	0.083742	0.0498147	0.0624958	5'missing	B0205.9.1	5 primer miss: exon 1 to 1	No extra exon.	55246629-e1c4-49b5-8042-e005cd3d1bc1
B0205.9_NP2	B0205.9	105.927	47.9192	10.0882	47.9192	196.566	101.784	19.0118	75.7703	0.470794	0.530632	0.632427	Extra_UTR	B0205.9.1	No miss exon.	No extra exon.	bdbe3c5c-6f16-4e22-bac6-7b733dd1f317
B0205.9_NP3	B0205.9	12.9456	7.76735	1.84937	3.32886	196.566	101.784	19.0118	75.7703	0.0763123	0.097275	0.0439336	Extra_UTR	B0205.9.1	No miss exon.	No extra exon.	d366ed45-53d8-4b2d-96a8-b3ef60d5a0b1
B0205.9_NP4	B0205.9	9.17649	4.89413	1.22353	3.05883	196.566	101.784	19.0118	75.7703	0.0480836	0.0643566	0.0403698	Intron_retention	B0205.9.1	5 primer miss: exon 1 to 1;Intron retention: intron 4 to 4	5 primer extra: exon 1 to 1	f6faeb2c-53e1-40b6-b627-cac24995145f
B0207.10_NP1	B0207.10	6.41248	0	5.61092	0.801561	15.9207	0	11.7286	4.19207	NA	0.478397	0.191209	Missing_UTR	B0207.10.1	No miss exon.	No extra exon.	4c0a182a-0e88-4d00-aa40-9e00061d352c
B0207.10_NP1	B0207.10	7.07585	0	5.30688	1.76896	15.9207	0	11.7286	4.19207	NA	0.452474	0.421978	Extra_UTR	B0207.10.1	No miss exon.	No extra exon.	a00a20d2-30dd-4d63-9335-998db5c33a39
B0207.12_NP1	B0207.12	14.0854	2.16698	10.8349	1.08349	36.4848	7.85861	21.3609	7.26527	0.275746	0.507229	0.149133	New_junction	NA	NA	NA	11592571-48b9-441d-825d-28b5b4f1b42a
B0207.12_NP1	B0207.12	11.3214	2.83034	4.71723	3.77378	36.4848	7.85861	21.3609	7.26527	0.360158	0.220834	0.519428	Missing_UTR	B0207.12b.1	No miss exon.	No extra exon.	d879b451-c210-4a3c-8076-3a1ece1e9ac7
B0207.4_NP1	B0207.4	8.3536	4.85048	0.538942	2.96418	424.18	208.542	17.8196	197.818	0.0232591	0.0302444	0.0149844	5'missing	B0207.4.1	5 primer miss: exon 1 to 1	No extra exon.	081eb34a-aea6-40af-8df8-50a89bb5394d
B0207.4_NP1	B0207.4	255.323	122.184	10.9544	122.184	424.18	208.542	17.8196	197.818	0.585898	0.614741	0.617658	Extra_UTR	B0207.4.1	No miss exon.	No extra exon.	33446874-4272-464f-a2bf-854ec86b313c
B0207.4_NP2	B0207.4	14.3017	7.86596	1.07263	5.36315	424.18	208.542	17.8196	197.818	0.0377189	0.0601939	0.0271115	5'missing	B0207.4.1	5 primer miss: exon 1 to 1	No extra exon.	754453a6-6ee7-4a7a-8c3f-f1c3e3b64285
B0207.4_NP3	B0207.4	27.2594	17.5672	0.605764	9.08646	424.18	208.542	17.8196	197.818	0.0842382	0.0339943	0.0459333	5'missing	B0207.4.1	5 primer miss: exon 1 to 2	No extra exon.	fffa298a-583b-44bc-a58b-0295a9d4131d
B0207.6_NP1	B0207.6	97.0718	29.0308	16.3298	51.7111	145.055	49.4318	26.1328	69.4902	0.58729	0.624878	0.744149	Extra_UTR	B0207.6.1	No miss exon.	No extra exon.	3f2fbdb8-9d6b-42e2-bbd3-a3614af43a3d
B0207.7_NP1	B0207.7	6.63361	0	1.32672	5.30688	7.96033	0	1.32672	6.63361	NA	1	0.8	5'missing	B0207.7.1	5 primer miss: exon 1 to 1	No extra exon.	d0a28f05-4d60-4d94-b87a-2b29150ac1e6
B0212.3_NP1	B0212.3	17.0263	6.62132	2.83771	7.56722	25.2077	11.0271	5.86153	8.31903	0.600457	0.484124	0.909628	Intron_retention	B0212.3.1	Intron retention: intron 5 to 5	No extra exon.	384cd439-cc71-44ae-aed5-a1450c4846c4
B0212.4_NP1	B0212.4	12.3827	3.37711	3.37711	5.62851	14.5939	4.70383	4.26159	5.62851	0.717949	0.792453	1	Extra_UTR	B0212.4a.1	No miss exon.	No extra exon.	00f1eb5e-838e-4781-8846-a8fe5e8ab270
B0213.14_NP1	B0213.14	6.31456	0	3.44431	2.87025	48.7444	0.991664	15.5533	32.1994	0	0.221452	0.08914	5'missing	B0213.14.2	5 primer miss: exon 1 to 1	No extra exon.	583ca62d-5e0a-47a4-859f-9cd6b8e57ddc
B0213.14_NP1	B0213.14	28.7583	0.991664	5.94998	21.8166	48.7444	0.991664	15.5533	32.1994	1	0.382554	0.677547	Extra_UTR	B0213.14.2	No miss exon.	No extra exon.	d36a3e98-04f8-4381-8d0c-ce12b9b6e85d
B0213.15_NP1	B0213.15	5.6768	0	4.86583	0.810972	68.9895	1.70835	60.4928	6.78832	0	0.0804365	0.119466	New_junction	NA	NA	NA	00e653f7-0ee9-45ae-aca5-9c2c3b8fc690
B0213.15_NP1	B0213.15	13.337	0	13.337	0	68.9895	1.70835	60.4928	6.78832	0	0.220473	0	Intron_retention	B0213.15a.1	Intron retention: intron 4 to 4	No extra exon.	40a9b243-dc9b-4fb6-8a17-f66665754710
B0213.15_NP2	B0213.15	27.7651	1.11061	23.3227	3.33182	68.9895	1.70835	60.4928	6.78832	0.650102	0.385545	0.490816	Extra_UTR	B0213.15a.1	No miss exon.	No extra exon.	a86d0e6a-51b9-4552-933d-41074d219c83
B0213.16_NP1	B0213.16	10.6138	0	6.19136	4.4224	21.2275	0	14.8151	6.41248	NA	0.41791	0.689655	Extra_UTR	B0213.16.1	No miss exon.	No extra exon.	6af847f8-045e-4f68-87a9-aea86ca7fcdd
B0213.17_NP1	B0213.17	14.1991	3.78642	10.4127	0	152.636	32.5218	116.634	3.48071	0.116427	0.0892766	0	3'missing	B0213.17.1	5 primer miss: exon 1 to 1;3 primer miss: exon 2 to 2	No extra exon.	2d2ad285-2bf5-4b89-b05e-4abbfe5353a4
B0213.17_NP1	B0213.17	8.11827	2.31951	5.79876	0	152.636	32.5218	116.634	3.48071	0.0713217	0.0497178	0	Missing_UTR	B0213.17.1	No miss exon.	No extra exon.	d6b766d7-4a51-4612-ab4a-965162b07943
B0213.17_NP2	B0213.17	10.2189	2.35821	7.8607	0	152.636	32.5218	116.634	3.48071	0.0725118	0.0673965	0	Extra_UTR	B0213.17.1	No miss exon.	No extra exon.	ecb6ca5d-8301-470c-bc2c-d20e775efba4
B0213.17_NP3	B0213.17	113.703	23.2047	87.0177	3.48071	152.636	32.5218	116.634	3.48071	0.713514	0.746077	1	Extra_UTR	B0213.17.1	No miss exon.	No extra exon.	ff09a59e-871c-47b1-9b3d-42e4eea390a7
B0213.2_NP1	B0213.2	84.7948	0.675656	24.3236	59.7956	947.151	5.96753	252.93	688.253	0.113222	0.0961675	0.0868802	Extra_UTR	B0213.2.1	5 primer miss: exon 1 to 1;3 primer miss: exon 2 to 2	5 primer extra: exon 1 to 1;3 primer extra: exon 2 to 2	026864b7-98bf-4a9e-8c67-76ebaad2c737
B0213.2_NP1	B0213.2	614.712	3.31679	153.678	457.718	947.151	5.96753	252.93	688.253	0.555807	0.607592	0.665042	Missing_UTR	B0213.2.1	No miss exon.	No extra exon.	0620bef1-69ba-41ad-b079-3b58f5b79d22
B0213.2_NP2	B0213.2	28.1454	0.234545	7.74	20.1709	947.151	5.96753	252.93	688.253	0.0393036	0.0306014	0.0293074	3'missing	B0213.2.1	5 primer miss: exon 1 to 1;3 primer miss: exon 2 to 2	No extra exon.	168b4ced-b33d-4c0c-8517-36e396f71853
B0213.2_NP3	B0213.2	12.6038	0	4.31184	8.29201	947.151	5.96753	252.93	688.253	0	0.0170476	0.0120479	3'missing	B0213.2.1	5 primer miss: exon 1 to 1;3 primer miss: exon 2 to 2	No extra exon.	2a5eda17-38a2-4a93-946b-554ad3525cec
B0213.2_NP4	B0213.2	56.7126	0.262558	16.2786	40.1714	947.151	5.96753	252.93	688.253	0.0439978	0.0643602	0.0583672	Extra_UTR	B0213.3.1	5 primer miss: exon 1 to 1;3 primer miss: exon 2 to 2	5 primer extra: exon 1 to 1;3 primer extra: exon 2 to 2	59079658-6187-4811-8d7e-f2b2e00f21ea
B0213.2_NP5	B0213.2	28.1454	0.234545	7.74	20.1709	947.151	5.96753	252.93	688.253	0.0393036	0.0306014	0.0293074	3'missing	B0213.2.1	5 primer miss: exon 1 to 1;3 primer miss: exon 2 to 2	No extra exon.	7df02823-ed11-4bd9-be72-253e36ae36c1
B0213.2_NP6	B0213.2	28.1454	0.234545	7.74	20.1709	947.151	5.96753	252.93	688.253	0.0393036	0.0306014	0.0293074	Extra_UTR	B0213.3.1	No miss exon.	No extra exon.	d5ee58da-00d7-4ad4-8a8f-afbd288bb14c
B0213.2_NP7	B0213.2	6.25612	0.20181	3.43078	2.62353	947.151	5.96753	252.93	688.253	0.0338181	0.0135641	0.00381187	3'missing	B0213.2.1	5 primer miss: exon 1 to 1;3 primer miss: exon 2 to 2	No extra exon.	e40f5ac4-820b-4094-9687-28e92e25b5d5
B0213.2_NP8	B0213.2	76.8345	0.627221	21.9527	54.2546	947.151	5.96753	252.93	688.253	0.105106	0.0867937	0.0788294	Fusion_gene	B0213.3.1	5 primer miss: exon 1 to 1;3 primer miss: exon 2 to 2	No extra exon.	f656cc32-457e-491b-9993-f4a42d325e0a
B0213.3_NP1	B0213.3	13.3778	0	3.64848	9.72929	209.511	0	45.9498	163.562	NA	0.0794015	0.0594839	3'missing	B0213.3.1	5 primer miss: exon 1 to 1;3 primer miss: exon 2 to 2	No extra exon.	0561c1f3-492c-4202-8d84-19e93faf768b
B0213.3_NP1	B0213.3	141.185	0	20.7244	120.461	209.511	0	45.9498	163.562	NA	0.451024	0.736486	Missing_UTR	B0213.3.1	No miss exon.	No extra exon.	5cebad47-88de-49f5-ad7e-d1b702fd243f
B0213.3_NP2	B0213.3	5.08576	0	1.01715	4.06861	209.511	0	45.9498	163.562	NA	0.0221362	0.0248751	3'missing	B0213.3.1	5 primer miss: exon 1 to 1;3 primer miss: exon 2 to 2	No extra exon.	7dfead62-c545-4f52-a3af-f35a6a924926
B0213.3_NP3	B0213.3	8.07089	0	4.03544	4.03544	209.511	0	45.9498	163.562	NA	0.0878229	0.0246723	Fusion_gene	B0213.4.1	3 primer miss: exon 2 to 2	3 primer extra: exon 2 to 3	aa670ed5-ddbe-45d2-86ff-da25d527eb9e
B0213.4_NP1	B0213.4	17.6896	2.2112	13.7095	1.76896	181.761	26.5607	99.6804	55.5196	0.0832507	0.137534	0.0318619	Fusion_gene	B0213.3.1	5 primer miss: exon 1 to 1	5 primer extra: exon 1 to 1	17d03284-144e-4538-98f0-bdc4cf2f2a46
B0213.4_NP1	B0213.4	106.69	12.7012	50.805	43.1842	181.761	26.5607	99.6804	55.5196	0.478196	0.509679	0.77782	Missing_UTR	B0213.4.1	No miss exon.	No extra exon.	bba86fac-5184-4d4a-9dc2-9867d5d268b6
B0213.4_NP2	B0213.4	20.3431	2.42179	15.0151	2.90615	181.761	26.5607	99.6804	55.5196	0.0911794	0.150632	0.0523446	Fusion_gene	B0213.3.1	5 primer miss: exon 1 to 1	5 primer extra: exon 1 to 1	ecb88e4d-165e-43b6-ab9d-ccb91c4b0f20
B0213.5_NP1	B0213.5	33.6103	19.9172	11.2034	2.48965	45.1085	27.3616	15.2573	2.48965	0.727926	0.7343	1	3'missing	B0213.5.1	5 primer miss: exon 1 to 1;3 primer miss: exon 2 to 2	No extra exon.	319b8e90-0cda-4014-81c0-2a97a5bd58ab
B0213.6_NP1	B0213.6	124.376	63.3396	46.0651	14.9712	502.827	263.219	185.558	54.0507	0.240634	0.248253	0.276984	Missing_UTR	B0213.6.1	No miss exon.	No extra exon.	27c0bfe5-5d44-4b2c-9ed5-b3f6b34cbefe
B0213.6_NP1	B0213.6	138.528	70.5231	50.3737	17.6308	502.827	263.219	185.558	54.0507	0.267926	0.271472	0.32619	Missing_UTR	B0213.6.1	No miss exon.	No extra exon.	333fa47a-1661-4277-b6fd-c1bab426f0dc
B0213.6_NP2	B0213.6	138.642	72.6222	52.8161	13.204	502.827	263.219	185.558	54.0507	0.2759	0.284635	0.24429	New_junction	NA	NA	NA	70d5023c-2f0c-4b20-bd8a-d6c9eb36ff58
B0213.6_NP3	B0213.6	9.61452	5.6556	3.11058	0.84834	502.827	263.219	185.558	54.0507	0.0214863	0.0167634	0.0156953	3'missing	B0213.6.1	5 primer miss: exon 1 to 1;3 primer miss: exon 2 to 2	No extra exon.	af53863c-9775-4f66-a898-19dcfe0c089e
B0213.6_NP4	B0213.6	27.1699	12.5399	10.45	4.17998	502.827	263.219	185.558	54.0507	0.0476407	0.0563165	0.0773345	Missing_UTR	B0213.6.1	No miss exon.	No extra exon.	b00b971c-c3aa-4093-803d-8a9435d7e8e2
B0213.6_NP5	B0213.6	5.43219	3.39512	1.69756	0.339512	502.827	263.219	185.558	54.0507	0.0128984	0.00914842	0.00628136	3'missing	B0213.6.1	5 primer miss: exon 1 to 1;3 primer miss: exon 2 to 2	No extra exon.	f242cf88-f6e9-4111-a7ca-72417207aced
B0213.6_NP6	B0213.6	21.476	12.2119	8.00088	1.2633	502.827	263.219	185.558	54.0507	0.0463943	0.043118	0.0233724	Extra_UTR	B0213.6.1	No miss exon.	No extra exon.	f5dfc936-4d92-4551-9f23-e7c533212c51
B0213.6_NP7	B0213.6	24.0758	13.8742	8.97741	1.22419	502.827	263.219	185.558	54.0507	0.0527096	0.0483807	0.022649	Missing_UTR	B0213.6.1	No miss exon.	No extra exon.	fa3feab0-e7f8-4f6f-914a-0f11f5d52158
B0218.1_NP1	B0218.1	5.10989	0.696803	3.01948	1.39361	298.267	35.7732	173.22	89.2741	0.0194784	0.0174315	0.0156104	3'missing	B0218.1.1	3 primer miss: exon 6 to 6	No extra exon.	2bda9a1b-bb95-40c0-b51c-398862adf4dd
B0218.1_NP1	B0218.1	89.5051	8.04541	60.3405	21.1192	298.267	35.7732	173.22	89.2741	0.224901	0.348347	0.236566	5'missing	B0218.1.1	5 primer miss: exon 1 to 1	No extra exon.	559a0d12-db32-4af0-bc52-9bdf3e3d66bd
B0218.1_NP2	B0218.1	6.54085	1.21127	3.63381	1.69578	298.267	35.7732	173.22	89.2741	0.0338597	0.020978	0.0189952	5'missing	B0218.1.1	5 primer miss: exon 1 to 2	No extra exon.	7b193cd1-6334-44b3-91e4-6ecf40719e80
B0218.1_NP3	B0218.1	9.63653	1.32918	5.31671	2.99065	298.267	35.7732	173.22	89.2741	0.0371557	0.0306934	0.0334996	5'missing	B0218.1.1	5 primer miss: exon 1 to 1	No extra exon.	d8254d7d-2e86-441a-822e-fd19a8641482
B0218.2_NP1	B0218.2	59.7467	8.53524	31.0372	20.1742	133.955	22.0761	75.4312	36.4473	0.386628	0.411464	0.553517	Extra_UTR	B0218.2.1	No miss exon.	No extra exon.	4605909a-a848-4b18-a652-3667fbfd5ab7
B0218.2_NP1	B0218.2	40.5092	7.44047	23.9748	9.09391	133.955	22.0761	75.4312	36.4473	0.337037	0.317837	0.249508	5'missing	B0218.2.1	5 primer miss: exon 1 to 1	No extra exon.	ff81bad7-7d38-4cd4-9038-24848aed5d53
B0218.3_NP1	B0218.3	5.29583	4.16101	1.13482	0	45.8272	36.5729	7.92097	1.33329	0.113773	0.143268	0	5'missing	B0218.3.1	5 primer miss: exon 1 to 1	No extra exon.	85c8a03f-bd6b-4089-a850-9956d7defe06
B0218.3_NP1	B0218.3	27.1867	22.0892	4.24793	0.849585	45.8272	36.5729	7.92097	1.33329	0.603978	0.536289	0.637212	Extra_UTR	B0218.3.1	No miss exon.	No extra exon.	ae19c77e-8fd4-4773-8f26-b078c861b885
B0218.6_NP1	B0218.6	14.5939	0	1.12261	13.4713	46.2141	0	7.24027	38.9738	NA	0.155051	0.34565	5'missing	B0218.6a.1	5 primer miss: exon 1 to 1	No extra exon.	c51a384c-5ce0-449a-badf-19b21a131d37
B0218.8_NP1	B0218.8	18.7389	0	14.3298	4.40916	115.592	4.88459	74.9826	33.0709	0	0.191108	0.133325	5'missing	B0218.8.1	5 primer miss: exon 1 to 1	No extra exon.	4e2a721f-04df-47c5-9bf4-21a921722eb0
B0218.8_NP1	B0218.8	7.0859	0	7.0859	0	115.592	4.88459	74.9826	33.0709	0	0.0945005	0	5'missing	B0218.8.1	5 primer miss: exon 1 to 1	No extra exon.	73e65623-3c13-4d7f-85c4-f15e2808ceb9
B0218.8_NP2	B0218.8	10.3364	1.37818	6.20182	2.75636	115.592	4.88459	74.9826	33.0709	0.282149	0.08271	0.0833471	Intron_retention	B0218.8.1	Intron retention: intron 2 to 2	No extra exon.	822adf55-824c-4e3c-b64f-b806d8406372
B0218.8_NP3	B0218.8	57.9435	1.20716	35.0076	21.7288	115.592	4.88459	74.9826	33.0709	0.247136	0.466875	0.657038	Missing_UTR	B0218.8.1	No miss exon.	No extra exon.	f6a985d0-e796-480e-9b2f-88af6b210ed1
B0222.1_NP1	B0222.1	7.18641	0.798489	5.58943	0.798489	23.881	2.59296	18.1422	3.14577	0.307945	0.308089	0.25383	3'missing	B0222.1.1	5 primer miss: exon 1 to 4;3 primer miss: exon 2 to 5	No extra exon.	03bf6208-98db-4097-8261-0180ef80fc73
B0222.1_NP1	B0222.1	11.8299	0.909995	10.0099	0.909995	23.881	2.59296	18.1422	3.14577	0.350948	0.551747	0.289276	Extra_UTR	B0222.1.1	No miss exon.	No extra exon.	e2c65789-9337-4042-a261-48ad937365cd
B0222.3_NP1	B0222.3	6.1045	0.763062	5.34143	0	25.4051	3.74548	20.3329	1.32672	0.203729	0.262699	0	5'missing	B0222.3.1	5 primer miss: exon 1 to 1	No extra exon.	ec9ca458-6c55-4a42-8b77-9ded6d0b2d2e
B0222.3_NP1	B0222.3	5.10946	1.02189	4.08756	0	25.4051	3.74548	20.3329	1.32672	0.272833	0.201032	0	3'missing	B0222.3.1	3 primer miss: exon 11 to 11	No extra exon.	f26f2080-1837-4d92-ace7-bdbbe508af48
B0222.4_NP1	B0222.4	18.7952	3.5241	7.04821	8.22291	30.2935	5.54367	15.2002	9.54963	0.635699	0.463693	0.861071	Extra_UTR	B0222.4.1	No miss exon.	No extra exon.	6941aaa8-5e1d-474a-b197-33cacbd2fb00
B0222.5_NP1	B0222.5	6.92738	0	2.30913	4.61825	103.954	1.93322	24.4678	77.5529	0	0.094374	0.0595497	3'missing	B0222.5.1	3 primer miss: exon 10 to 10	No extra exon.	36cb39f2-0034-4902-82a8-40d5569a8612
B0222.5_NP1	B0222.5	22.6532	0	6.07768	16.5755	103.954	1.93322	24.4678	77.5529	0	0.248394	0.213731	Extra_UTR	B0222.5.1	No miss exon.	No extra exon.	7d7fa49c-b01e-42d8-a710-f486ef6222ff
B0222.5_NP2	B0222.5	16.8377	0	2.80628	14.0314	103.954	1.93322	24.4678	77.5529	0	0.114693	0.180927	Intron_retention	B0222.5.1	Intron retention: intron 4 to 4	No extra exon.	e45bd015-254b-4e3a-ac34-509c5a521242
B0222.5_NP3	B0222.5	6.85473	0	2.28491	4.56982	103.954	1.93322	24.4678	77.5529	0	0.0933842	0.0589252	5'missing	B0222.5.1	5 primer miss: exon 1 to 1	No extra exon.	f346e5ce-03e3-47d2-8765-548861b9af14
B0222.6_NP1	B0222.6	6.72784	0.448523	5.38227	0.897046	436.264	53.0343	245.599	137.63	0.00845722	0.0219149	0.00651778	5'extra	B0222.6.1	5 primer miss: exon 1 to 1	5 primer extra: exon 1 to 1	0d799a3f-4b49-4901-9b51-277bba168a60
B0222.6_NP1	B0222.6	6.00209	0.21436	3.85849	1.92924	436.264	53.0343	245.599	137.63	0.00404192	0.0157105	0.0140176	3'missing	B0222.6.1	5 primer miss: exon 1 to 1;3 primer miss: exon 2 to 2	No extra exon.	151f3e14-1bae-42f4-92f6-21e15d4a1b54
B0222.6_NP2	B0222.6	176.932	22.9948	95.173	58.7645	436.264	53.0343	245.599	137.63	0.433584	0.387513	0.426973	Extra_UTR	B0222.6.1	No miss exon.	No extra exon.	38e3e08a-ff28-4eaa-93c7-1f7d4c95ea1b
B0222.6_NP3	B0222.6	15.7357	1.12398	8.61718	5.99456	436.264	53.0343	245.599	137.63	0.0211934	0.0350863	0.0435555	Extra_UTR	B0222.6.1	No miss exon.	No extra exon.	41446e4a-e261-4129-859e-bfdcfd514325
B0222.6_NP4	B0222.6	18.2774	2.15028	11.8266	4.30057	436.264	53.0343	245.599	137.63	0.0405452	0.0481539	0.0312472	Missing_UTR	B0222.6.1	No miss exon.	No extra exon.	5cc4b9b3-d7a3-467d-a330-0bc3891d96a7
B0222.6_NP5	B0222.6	8.90745	1.37038	5.82411	1.71297	436.264	53.0343	245.599	137.63	0.0258394	0.0237139	0.0124462	3'missing	B0222.6.1	5 primer miss: exon 1 to 1;3 primer miss: exon 2 to 2	No extra exon.	d68efeda-684f-4bf3-8e11-2fc9953f6812
B0222.7_NP1	B0222.7	13.2451	0	2.48346	10.7616	54.4177	1.22722	8.67561	44.5148	0	0.286257	0.241754	Fusion_gene	B0222.6.1	5 primer miss: exon 1 to 1	5 primer extra: exon 1 to 1	7d9fbc90-9b64-4022-ae0c-7f8b18cc84a4
B0222.7_NP1	B0222.7	34.3621	1.22722	4.90887	28.226	54.4177	1.22722	8.67561	44.5148	1	0.565824	0.63408	Extra_UTR	B0222.7.1	No miss exon.	No extra exon.	ce3174bb-9877-4784-8f25-c2c21d18d84d
B0222.8_NP1	B0222.8	128.073	14.5237	105.627	7.92203	735.841	75.402	569.485	90.9536	0.192617	0.185478	0.0870996	3'missing	B0222.8.1	5 primer miss: exon 1 to 1;3 primer miss: exon 2 to 2	No extra exon.	4d65c9d0-afe6-4434-a054-5407fa420d5c
B0222.8_NP1	B0222.8	223.628	20.5711	165.233	37.8244	735.841	75.402	569.485	90.9536	0.27282	0.290144	0.415864	Extra_UTR	B0222.8.1	No miss exon.	No extra exon.	72b848aa-42d3-4820-9d2d-acd0ec6a1a96
B0222.8_NP2	B0222.8	5.97024	0	5.97024	0	735.841	75.402	569.485	90.9536	0	0.0104836	0	3'extra	B0222.8.1	5 primer miss: exon 1 to 1;3 primer miss: exon 2 to 2	5 primer extra: exon 1 to 1;3 primer extra: exon 2 to 2	9bd9585f-e943-4f11-939e-0ff0e4bec144
B0222.8_NP3	B0222.8	6.0808	0	6.0808	0	735.841	75.402	569.485	90.9536	0	0.0106777	0	3'extra	B0222.8.1	5 primer miss: exon 1 to 1;3 primer miss: exon 2 to 2	5 primer extra: exon 1 to 1;3 primer extra: exon 2 to 2	f989cedb-6cce-43fe-a21c-1400b81b414c
B0222.8_NP4	B0222.8	123.085	11.6607	106.242	5.18252	735.841	75.402	569.485	90.9536	0.154647	0.186558	0.0569798	Missing_UTR	B0222.8.1	No miss exon.	No extra exon.	f9f5b10f-74a1-41da-9db3-92572236ba1e
B0222.9_NP1	B0222.9	6.13505	0.438218	3.94396	1.75287	39.6368	4.29838	24.9895	10.3489	0.10195	0.157825	0.169377	5'missing	B0222.9.1	5 primer miss: exon 1 to 1	No extra exon.	793595d8-4141-4313-a4fc-4855375c57cc
B0222.9_NP1	B0222.9	23.1613	3.56328	11.5807	8.01737	39.6368	4.29838	24.9895	10.3489	0.828981	0.46342	0.774707	Intron_retention	B0222.9.1	Intron retention: intron 11 to 11	No extra exon.	9b5ac986-e941-4a1e-a80c-a699dbbac7a3
B0228.1_NP1	B0228.1	16.8494	0	6.48052	10.3688	32.8363	0	15.6386	17.1978	NA	0.414393	0.602918	Extra_UTR	B0228.1.1	No miss exon.	No extra exon.	e6eeb57c-f53c-41a4-a6d2-02b138e23609
B0228.5_NP1	B0228.5	6.96529	2.32176	3.48264	1.16088	11.6088	4.47768	4.80936	2.32176	0.518519	0.724138	0.5	Missing_UTR	B0228.5a.1	No miss exon.	No extra exon.	0e4d70ea-3cbd-4474-aa68-cc778a09534c
B0228.6_NP1	B0228.6	56.5183	51.8085	4.70986	0	81.4607	76.1455	5.31518	0	0.680388	0.886115	NA	Extra_UTR	B0228.6.1	No miss exon.	No extra exon.	531f4db0-e545-4abe-a4d0-83400c71014c
B0228.6_NP1	B0228.6	19.3701	18.7648	0.605316	0	81.4607	76.1455	5.31518	0	0.246434	0.113885	NA	5'missing	B0228.6.1	5 primer miss: exon 1 to 1	No extra exon.	c6c35ba9-4b6c-40d9-8c8d-01bb7e1198c8
B0228.7_NP1	B0228.7	5.88079	2.9404	2.2053	0.735099	354.223	104.212	102	148.012	0.0282156	0.0216206	0.00496648	Missing_UTR	B0228.7.2	No miss exon.	No extra exon.	2721d9c2-c507-4839-b51e-14b4b812d8b7
B0228.7_NP1	B0228.7	25.6047	12.5608	7.24662	5.79729	354.223	104.212	102	148.012	0.120531	0.0710455	0.0391677	Extra_UTR	B0228.7.2	No miss exon.	No extra exon.	6321631d-aeb6-478e-8175-4ba2a53abc1f
B0228.7_NP2	B0228.7	26.5113	11.7828	8.41629	6.31221	354.223	104.212	102	148.012	0.113066	0.0825129	0.0426466	Extra_UTR	B0228.7.2	No miss exon.	No extra exon.	7d7f0d6d-8937-43f6-8591-2ac96c80098f
B0228.7_NP3	B0228.7	11.8068	2.83363	4.25045	4.72272	354.223	104.212	102	148.012	0.0271911	0.0416713	0.0319077	3'missing	B0228.7.2	3 primer miss: exon 7 to 7	No extra exon.	beb93d65-8fbf-4abe-a844-00ae2c38036f
B0228.7_NP4	B0228.7	10.4258	2.60645	4.17033	3.64904	354.223	104.212	102	148.012	0.0250111	0.0408857	0.0246536	Intron_retention	B0228.7.2	Intron retention: intron 3 to 3	No extra exon.	ca7dbea1-4365-451d-8572-7cbe64336820
B0228.7_NP5	B0228.7	238.123	63.0326	63.0326	112.058	354.223	104.212	102	148.012	0.604851	0.617969	0.757087	Extra_UTR	B0228.7.2	No miss exon.	No extra exon.	e50ba3de-4f75-4ae1-b45a-b654ec199238
B0238.1_NP1	B0238.1	9.1449	1.82898	6.40143	0.91449	107.584	21.3674	73.6208	12.5963	0.0855967	0.0869514	0.0726001	Intron_retention	B0238.1.1	Intron retention: intron 4 to 4	No extra exon.	a4de3df3-9bb0-4f71-8062-62d667f6a646
B0238.1_NP1	B0238.1	16.1323	4.03307	11.2926	0.806615	107.584	21.3674	73.6208	12.5963	0.188749	0.153389	0.064036	5'missing	B0238.1.1	5 primer miss: exon 1 to 1	No extra exon.	a755646a-0123-4b55-9937-375dae80b860
B0238.10_NP1	B0238.10	8.05635	1.94912	3.11859	2.98865	548.939	212.946	147.019	188.975	0.00915313	0.0212122	0.015815	5'missing	B0238.10.1	5 primer miss: exon 1 to 2	No extra exon.	27bc70e0-d658-458b-9117-328176711810
B0238.10_NP1	B0238.10	9.16195	2.32467	3.41864	3.41864	548.939	212.946	147.019	188.975	0.0109168	0.0232531	0.0180904	5'missing	B0238.10.1	5 primer miss: exon 1 to 2	No extra exon.	4034ab9b-6c93-4f1d-8534-c2ae61f4e516
B0238.10_NP2	B0238.10	10.9751	2.86308	4.13556	3.9765	548.939	212.946	147.019	188.975	0.0134451	0.0281295	0.0210425	3'missing	B0238.10.1	5 primer miss: exon 1 to 1;3 primer miss: exon 4 to 4	No extra exon.	41779033-af52-4128-bc53-5524499bf9ad
B0238.10_NP3	B0238.10	178.104	71.2416	44.0573	62.8051	548.939	212.946	147.019	188.975	0.334553	0.299672	0.332346	Extra_UTR	B0238.10.1	No miss exon.	No extra exon.	47f4c6f8-1bc2-4ad2-9272-b6b1f15ac4a4
B0238.10_NP4	B0238.10	12.1313	2.95506	4.66588	4.51035	548.939	212.946	147.019	188.975	0.013877	0.0317366	0.0238675	5'missing	B0238.10.1	5 primer miss: exon 1 to 1	No extra exon.	51983489-19f1-450a-a21a-d97569145acd
B0238.10_NP5	B0238.10	32.8281	8.92695	11.2307	12.6705	548.939	212.946	147.019	188.975	0.0419213	0.0763894	0.0670486	Intron_retention	B0238.10.1	Intron retention: intron 2 to 2	No extra exon.	a9d0591c-b5d8-43d4-9cd7-809dc060b8d8
B0238.10_NP6	B0238.10	29.2018	9.20776	9.997	9.997	548.939	212.946	147.019	188.975	0.04324	0.0679982	0.0529012	5'missing	B0238.10.1	5 primer miss: exon 1 to 1	No extra exon.	af898e57-fff7-4f35-ac1c-89273bcf4e1b
B0238.10_NP7	B0238.10	16.9075	4.83071	5.86586	6.21091	548.939	212.946	147.019	188.975	0.0226852	0.0398987	0.0328663	New_junction	NA	NA	NA	c60929e4-169e-49ec-8de1-182b2a989f91
B0238.10_NP8	B0238.10	32.0321	9.63798	10.7719	11.6223	548.939	212.946	147.019	188.975	0.0452603	0.0732686	0.0615017	3'missing	B0238.10.1	5 primer miss: exon 1 to 3;3 primer miss: exon 2 to 4	No extra exon.	e3f7798a-ee73-4610-9208-0661e3d097b3
B0238.10_NP9	B0238.10	12.0365	2.96283	4.62943	4.44425	548.939	212.946	147.019	188.975	0.0139136	0.0314887	0.0235177	5'missing	B0238.10.1	5 primer miss: exon 1 to 2	No extra exon.	fc6be57d-3a53-4e00-b605-5b1fae34aa1d
B0238.11_NP1	B0238.11	19.9182	13.6282	2.93531	3.35464	986.333	572.18	100.336	313.817	0.0238181	0.029255	0.0106898	5'missing	B0238.11.1	5 primer miss: exon 1 to 2	No extra exon.	031f56b6-642b-4e98-bcc2-8f9d4b0e4f60
B0238.11_NP1	B0238.11	10.5195	8.04435	1.65012	0.825062	986.333	572.18	100.336	313.817	0.0140591	0.016446	0.00262912	3'missing	B0238.11.1	5 primer miss: exon 1 to 1;3 primer miss: exon 4 to 4	No extra exon.	08760394-47c8-48b6-b660-c57d8c6f1e12
B0238.11_NP2	B0238.11	33.672	23.9855	5.53512	4.15134	986.333	572.18	100.336	313.817	0.0419195	0.055166	0.0132285	Extra_UTR	B0238.11.1	No miss exon.	No extra exon.	0f5cf553-213a-42cb-b596-2899288f46ea
B0238.11_NP3	B0238.11	346.015	186.079	33.8326	126.103	986.333	572.18	100.336	313.817	0.32521	0.337194	0.401837	5'missing	B0238.11.1	5 primer miss: exon 1 to 1	No extra exon.	46e6e96b-e3fb-4807-81b1-600a50138125
B0238.11_NP4	B0238.11	336.725	178.934	31.4552	126.336	986.333	572.18	100.336	313.817	0.312722	0.3135	0.40258	Extra_UTR	B0238.11.1	No miss exon.	No extra exon.	488a48c5-e4dc-4330-9bdd-24b05115338f
B0238.11_NP5	B0238.11	15.4343	10.8948	1.51317	3.02634	986.333	572.18	100.336	313.817	0.0190409	0.0150811	0.00964366	5'missing	B0238.11.1	5 primer miss: exon 1 to 1	No extra exon.	5b1419d4-4400-4254-bfa7-9b53009265f3
B0238.11_NP6	B0238.11	13.7128	9.31114	1.69293	2.70869	986.333	572.18	100.336	313.817	0.0162731	0.0168727	0.00863145	3'extra	B0238.11.1	No miss exon.	3 primer extra: exon 5 to 5	5e253e2e-a65e-4285-be55-8aff65842f04
B0238.11_NP7	B0238.11	10.2554	7.60884	0.661638	1.98491	986.333	572.18	100.336	313.817	0.013298	0.00659425	0.00632508	3'missing	B0238.11.1	3 primer miss: exon 3 to 4	No extra exon.	73e7cc0b-2599-48c1-8dd8-b29bd516fa06
B0238.11_NP8	B0238.11	10.8775	7.86884	1.38862	1.62006	986.333	572.18	100.336	313.817	0.0137524	0.0138397	0.00516243	5'missing	B0238.11.1	5 primer miss: exon 1 to 2	No extra exon.	ac8897fa-965b-42b1-914f-1501d0e9dd56
B0238.11_NP9	B0238.11	18.7796	12.98	2.20937	3.59022	986.333	572.18	100.336	313.817	0.0226852	0.0220198	0.0114405	3'missing	B0238.11.1	3 primer miss: exon 4 to 4	No extra exon.	b726f3bb-23ea-476c-a3b3-807f37062b47
B0238.11_NP10	B0238.11	12.7845	8.69345	1.7046	2.38644	986.333	572.18	100.336	313.817	0.0151936	0.016989	0.00760456	5'extra	B0238.11.1	No miss exon.	5 primer extra: exon 1 to 1	b9588acd-c7c8-4ddd-b4fa-a60cb3d73f0f
B0238.11_NP11	B0238.11	12.7023	9.03815	1.46565	2.19847	986.333	572.18	100.336	313.817	0.015796	0.0146074	0.00700559	5'missing	B0238.11.1	5 primer miss: exon 1 to 1	No extra exon.	d614a520-598e-49ca-bd2f-5c3789d4048f
B0238.12_NP1	B0238.12	9.55239	0	8.35834	1.19405	55.7223	2.56537	37.7291	15.4278	0	0.221535	0.0773961	5'missing	B0238.12.1	5 primer miss: exon 1 to 1	No extra exon.	580a1764-ac3e-42df-8bae-5f0ce7cc399a
B0238.12_NP1	B0238.12	9.55239	1.19405	7.16429	1.19405	55.7223	2.56537	37.7291	15.4278	0.465449	0.189887	0.0773961	5'missing	B0238.12.1	5 primer miss: exon 1 to 2	No extra exon.	97a8e49d-d5d5-48e7-a78c-ec0bb113a4c7
B0238.12_NP2	B0238.12	18.8394	0.697757	11.1641	6.97757	55.7223	2.56537	37.7291	15.4278	0.271991	0.295901	0.452274	Extra_UTR	B0238.12.1	No miss exon.	No extra exon.	ba100160-87a6-4455-a41e-ada0577e51dd
B0238.15_NP1	B0238.15	13.2672	7.96033	0	5.30688	13.2672	7.96033	0	5.30688	1	NA	1	Extra_UTR	B0238.15.1	No miss exon.	No extra exon.	b5fa22ee-4f15-4327-a8fd-99c5b3aa37cd
B0238.9_NP1	B0238.9	10.6138	1.76896	0.884481	7.96033	39.8016	8.08668	4.67511	27.0398	0.21875	0.189189	0.294393	New_junction	NA	NA	NA	7d8f8f3e-ac6a-4176-9469-5ee32aec5561
B0240.1_NP1	B0240.1	11.6088	7.14388	3.57194	0.892985	20.8959	13.28	6.14246	1.47343	0.537944	0.581516	0.606061	Extra_UTR	B0240.1.1	No miss exon.	No extra exon.	35308b70-284a-4b2f-8ac5-6c7a5efcd3db
B0240.4_NP1	B0240.4	6.06908	2.5554	1.11799	2.39569	372.83	155.598	50.0672	167.165	0.0164231	0.0223297	0.0143313	Intron_retention	B0240.4.1	Intron retention: intron 2 to 3	No extra exon.	1c986ee5-f3dd-44a7-ab59-7eb22e473e75
B0240.4_NP1	B0240.4	68.3673	34.4973	11.9172	21.9528	372.83	155.598	50.0672	167.165	0.221707	0.238025	0.131324	Intron_retention	B0240.4.1	5 primer miss: exon 1 to 1;Intron retention: intron 3 to 4	No extra exon.	1cbc5b47-071e-446b-96f6-be89bd9453e3
B0240.4_NP2	B0240.4	8.26688	3.70584	1.42532	3.13571	372.83	155.598	50.0672	167.165	0.0238167	0.0284682	0.0187582	Intron_retention	B0240.4.1	Intron retention: intron 3 to 3	5 primer extra: exon 1 to 1	2f832414-de46-4187-865e-e84765bfef90
B0240.4_NP3	B0240.4	148.568	51.4592	13.2798	83.8287	372.83	155.598	50.0672	167.165	0.330718	0.265239	0.501473	Extra_UTR	B0240.4.1	No miss exon.	No extra exon.	313192a1-6472-49ff-a50b-c0c7b313d29a
B0240.4_NP4	B0240.4	8.1342	3.78661	1.2622	3.08539	372.83	155.598	50.0672	167.165	0.0243358	0.0252102	0.0184572	5'missing	B0240.4.1	5 primer miss: exon 1 to 1	No extra exon.	63243d3a-e357-488e-a151-d7d005f6fe72
B0240.4_NP5	B0240.4	8.68404	5.04234	1.12052	2.52117	372.83	155.598	50.0672	167.165	0.0324061	0.0223803	0.015082	3'missing	B0240.4.1	3 primer miss: exon 7 to 8	No extra exon.	6d020bab-606a-45a4-a32d-17500ecb9072
B0240.4_NP6	B0240.4	38.3171	17.3764	5.79212	15.1486	372.83	155.598	50.0672	167.165	0.111674	0.115687	0.0906209	Intron_retention	B0240.4.1	Intron retention: intron 3 to 3	No extra exon.	8ae55b65-3ef3-48f4-bbee-692529167bd8
B0240.4_NP7	B0240.4	12.5787	4.82184	1.88681	5.87007	372.83	155.598	50.0672	167.165	0.030989	0.0376855	0.0351155	Intron_retention	B0240.4.1	Intron retention: intron 4 to 4	No extra exon.	bee252d0-5ce4-410a-b4fa-18dba559e214
B0240.4_NP8	B0240.4	13.4411	6.28696	1.95113	5.203	372.83	155.598	50.0672	167.165	0.0404051	0.0389701	0.031125	3'extra	B0240.4.1	5 primer miss: exon 1 to 1	3 primer extra: exon 8 to 8	d4f9826f-9e52-4b94-82cf-6f8b43f859c4
B0240.4_NP9	B0240.4	9.92528	3.83081	1.56715	4.52732	372.83	155.598	50.0672	167.165	0.0246199	0.0313009	0.027083	Intron_retention	B0240.4.1	Intron retention: intron 2 to 2	No extra exon.	d9fe39f9-0f29-49f9-b8da-e882b5567030
B0240.4_NP10	B0240.4	13.3084	6.23832	2.07944	4.99066	372.83	155.598	50.0672	167.165	0.0400924	0.041533	0.0298547	3'missing	B0240.4.1	3 primer miss: exon 8 to 8	No extra exon.	f438e80f-7c1e-407b-b698-2af09c0be053
B0244.2_NP1	B0244.2	8.48032	2.31282	5.39657	0.770938	433.838	72.5717	315.88	43.4271	0.0318694	0.0170842	0.0177525	5'missing	B0244.2.1	5 primer miss: exon 1 to 2	No extra exon.	278fd35f-93ce-41ae-8ea3-a53709d68029
B0244.2_NP1	B0244.2	6.35599	1.41244	3.53111	1.41244	433.838	72.5717	315.88	43.4271	0.0194627	0.0111786	0.0325244	3'missing	B0244.2.1	3 primer miss: exon 12 to 12	No extra exon.	6a895ded-133f-4c7f-afff-03d56abdffd7
B0244.2_NP2	B0244.2	105.04	17.2732	77.963	9.80373	433.838	72.5717	315.88	43.4271	0.238016	0.246812	0.225751	Intron_retention	B0244.2.1	Intron retention: intron 4 to 4	No extra exon.	6c7c9dcf-f49a-413c-ad3f-309a30ff9139
B0244.2_NP3	B0244.2	5.95324	0.850462	4.25231	0.850462	433.838	72.5717	315.88	43.4271	0.0117189	0.0134618	0.0195837	Intron_retention	B0244.2.1	5 primer miss: exon 1 to 1;Intron retention: intron 8 to 8;3 primer miss: exon 12 to 12	No extra exon.	b8189b1c-cf66-47be-8e30-b14763cbc724
B0244.2_NP4	B0244.2	122.768	20.0537	91.4645	11.2496	433.838	72.5717	315.88	43.4271	0.27633	0.289554	0.259047	Intron_retention	B0244.2.1	Intron retention: intron 9 to 9	No extra exon.	e79d17f6-f5c7-460a-b69e-44f3344a387a
B0244.2_NP5	B0244.2	95.366	14.2673	74.3404	6.75822	433.838	72.5717	315.88	43.4271	0.196597	0.235343	0.155622	5'missing	B0244.2.1	5 primer miss: exon 1 to 1	No extra exon.	e83b6499-3ef7-4513-b7fb-5ea47f42a0c1
B0244.2_NP6	B0244.2	70.8769	11.6574	50.3599	8.85961	433.838	72.5717	315.88	43.4271	0.160633	0.159427	0.204011	Extra_UTR	B0244.2.1	No miss exon.	No extra exon.	fee6e049-5a74-4fa0-ac7b-b2b791655ffe
B0244.8_NP1	B0244.8	6.20953	0	0.238828	5.9707	372.996	6.82691	30.2769	335.892	0	0.00788813	0.0177757	5'missing	B0244.8.1	5 primer miss: exon 1 to 1	No extra exon.	1e5ecf3f-e220-477d-aa3d-58603d2a1a30
B0244.8_NP1	B0244.8	20.775	0.301087	2.4087	18.0652	372.996	6.82691	30.2769	335.892	0.044103	0.0795557	0.0537829	New_junction	NA	NA	NA	27b9ef05-7f06-480e-8df8-c0326654657c
B0244.8_NP2	B0244.8	9.00986	0.191699	0.958495	7.85966	372.996	6.82691	30.2769	335.892	0.0280799	0.0316577	0.0233994	New_junction	B0244.8.1	No miss exon.	Intron extra: intron 3 to 3	37a40a9a-0a24-450e-a2a9-4f13cf0fb6ff
B0244.8_NP3	B0244.8	123.043	4.21381	10.1131	108.716	372.996	6.82691	30.2769	335.892	0.617234	0.334021	0.323664	5'missing	B0244.8.1	5 primer miss: exon 1 to 2	No extra exon.	64dbd4bc-2602-458b-877c-0ea57877e234
B0244.8_NP4	B0244.8	18.7391	0.734868	2.20461	15.7997	372.996	6.82691	30.2769	335.892	0.107643	0.0728148	0.047038	New_junction	NA	NA	NA	8657abca-0f69-4a00-b4d1-017474d34699
B0244.8_NP5	B0244.8	5.4056	0.158988	0.794941	4.45167	372.996	6.82691	30.2769	335.892	0.0232884	0.0262557	0.0132533	3'missing	B0244.8.1	5 primer miss: exon 1 to 4;3 primer miss: exon 2 to 5	No extra exon.	906c5f5b-7a2f-47aa-b79f-41b8372c65d0
B0244.8_NP6	B0244.8	10.2544	0	0.569692	9.68476	372.996	6.82691	30.2769	335.892	0	0.0188161	0.0288329	5'extra	B0244.8.1	5 primer miss: exon 1 to 2;3 primer miss: exon 4 to 5	5 primer extra: exon 1 to 1	d4de546c-15a0-466c-9d33-881223b9b6c3
B0244.8_NP7	B0244.8	9.00512	0	0.750427	8.25469	372.996	6.82691	30.2769	335.892	0	0.0247855	0.0245754	Intron_retention	B0244.8.1	Intron retention: intron 2 to 3	No extra exon.	e4aca03e-6818-4f79-afd3-b05422c8f769
B0244.8_NP8	B0244.8	35.5237	0.480051	3.36035	31.6833	372.996	6.82691	30.2769	335.892	0.0703174	0.110987	0.094326	Intron_retention	B0244.8.1	Intron retention: intron 2 to 2	No extra exon.	f69d1504-d69f-4e32-aeaa-4ee336459fad
B0250.1_NP1	B0250.1	304.908	36.8191	116.21	151.879	10441.7	1416.33	3439.7	5585.72	0.025996	0.033785	0.0271905	Missing_UTR	B0250.1.1	No miss exon.	No extra exon.	02001a11-c800-4661-bfa0-bc1b033601c4
B0250.1_NP1	B0250.1	6.64587	1.04092	2.24198	3.36297	10441.7	1416.33	3439.7	5585.72	0.000734939	0.000651797	0.000602066	3'extra	B0250.1.1	No miss exon.	3 primer extra: exon 4 to 4	07e20042-a861-47fa-ac1b-9170df72ff79
B0250.1_NP2	B0250.1	263.818	42.8475	119.361	101.61	10441.7	1416.33	3439.7	5585.72	0.0302524	0.034701	0.018191	Extra_UTR	B0250.1.1	No miss exon.	No extra exon.	0f85e15d-6c93-45d8-bd36-bdaea7162866
B0250.1_NP3	B0250.1	4768.67	462.194	1458.72	2847.75	10441.7	1416.33	3439.7	5585.72	0.326331	0.424085	0.509827	Extra_UTR	B0250.1.1	No miss exon.	No extra exon.	1d721b6d-5d0d-45ea-bd87-8aa3c0434a4c
B0250.1_NP4	B0250.1	6.64587	1.04092	2.24198	3.36297	10441.7	1416.33	3439.7	5585.72	0.000734939	0.000651797	0.000602066	3'extra	B0250.1.1	No miss exon.	3 primer extra: exon 4 to 4	2a907f00-bd89-4673-bb7e-a5718d4ad7f2
B0250.1_NP5	B0250.1	6.97755	1.16293	2.32585	3.48878	10441.7	1416.33	3439.7	5585.72	0.000821081	0.000676179	0.000624589	3'extra	B0250.1.1	No miss exon.	3 primer extra: exon 4 to 4	34351a2e-8b72-49d1-a27b-c49e3ab74fa9
B0250.1_NP6	B0250.1	6.64587	1.04092	2.24198	3.36297	10441.7	1416.33	3439.7	5585.72	0.000734939	0.000651797	0.000602066	3'extra	B0250.1.1	No miss exon.	3 primer extra: exon 4 to 4	40c98a2a-9b02-4fdd-9dd8-28a0de64d7a8
B0250.1_NP7	B0250.1	38.3772	6.35697	8.47595	23.5443	10441.7	1416.33	3439.7	5585.72	0.00448832	0.00246416	0.00421509	3'missing	B0250.1.1	3 primer miss: exon 3 to 3	No extra exon.	44de6a82-c716-43be-a16e-fcd17a4b0117
B0250.1_NP8	B0250.1	12.4206	2.00332	4.00664	6.41063	10441.7	1416.33	3439.7	5585.72	0.00141444	0.00116482	0.00114768	3'missing	B0250.1.1	3 primer miss: exon 3 to 3	No extra exon.	4fe7fd62-fe23-412a-bbeb-0b863e5e3881
B0250.1_NP9	B0250.1	535.676	243.715	25.8636	266.097	10441.7	1416.33	3439.7	5585.72	0.172075	0.00751917	0.0476388	3'extra	B0250.1.1	No miss exon.	3 primer extra: exon 4 to 4	6c08b25f-6af0-4b63-a4a2-4be1ddde61c4
B0250.1_NP10	B0250.1	3790.3	516.58	1516.94	1756.78	10441.7	1416.33	3439.7	5585.72	0.36473	0.44101	0.314513	Extra_UTR	B0250.1.1	No miss exon.	No extra exon.	72739cc0-f882-47bb-97b8-b0051efd2f4b
B0250.1_NP11	B0250.1	6.6897	1.05124	2.00691	3.63155	10441.7	1416.33	3439.7	5585.72	0.000742224	0.000583455	0.000650149	3'missing	B0250.1.1	3 primer miss: exon 3 to 3	No extra exon.	8cb3087a-9f0b-410f-bdaa-deced2cf3a65
B0250.1_NP12	B0250.1	6.88811	1.53069	3.82673	1.53069	10441.7	1416.33	3439.7	5585.72	0.00108074	0.00111252	0.000274036	Missing_UTR	B0250.1.1	No miss exon.	No extra exon.	91d69e39-5890-4384-89b0-aff66062a40f
B0250.1_NP13	B0250.1	25.0481	5.91023	6.75455	12.3833	10441.7	1416.33	3439.7	5585.72	0.0041729	0.00196371	0.00221696	Extra_UTR	B0250.19	No miss exon.	No extra exon.	93a02e28-534e-4516-a256-ec9e1b4b2f41
B0250.1_NP14	B0250.1	7.6092	2.6856	2.6856	2.238	10441.7	1416.33	3439.7	5585.72	0.00189616	0.000780767	0.000400665	Missing_UTR	B0250.1.1	No miss exon.	No extra exon.	99d397e4-84fd-46aa-8904-408397fbb9fb
B0250.1_NP15	B0250.1	7.97259	1.23385	2.75244	3.9863	10441.7	1416.33	3439.7	5585.72	0.00087116	0.0008002	0.000713659	3'extra	B0250.1.1	No miss exon.	3 primer extra: exon 4 to 4	a364ea42-257e-451b-83aa-a63b17049881
B0250.1_NP16	B0250.1	8.14204	2.50524	0	5.6368	10441.7	1416.33	3439.7	5585.72	0.00176882	0	0.00100914	3'missing	B0250.1.1	5 primer miss: exon 1 to 2;3 primer miss: exon 2 to 3	No extra exon.	a68cb1fa-b1df-4a2e-b5d6-3b379780e238
B0250.1_NP17	B0250.1	13.3228	4.09933	1.02483	8.19867	10441.7	1416.33	3439.7	5585.72	0.00289433	0.000297943	0.00146779	Extra_UTR	B0250.1.1	No miss exon.	No extra exon.	bb121b95-72c6-4f83-87bb-d6d6ed4f8096
B0250.1_NP18	B0250.1	8.68533	2.17133	1.3028	5.2112	10441.7	1416.33	3439.7	5585.72	0.00153306	0.000378754	0.00093295	Missing_UTR	B0250.1.1	No miss exon.	No extra exon.	c71d0a66-e5cc-4da0-a020-bab563846bac
B0250.1_NP19	B0250.1	8.59555	2.71438	1.35719	4.52397	10441.7	1416.33	3439.7	5585.72	0.00191649	0.000394568	0.000809918	Extra_UTR	B0250.1.1	No miss exon.	No extra exon.	dd15a05b-b6e8-4989-aa4e-ff661a10b5eb
B0250.1_NP20	B0250.1	224.007	7.38079	19.1901	197.436	10441.7	1416.33	3439.7	5585.72	0.00521119	0.005579	0.0353466	3'extra	B0250.1.1	No miss exon.	3 primer extra: exon 4 to 4	dd8113e2-efe6-4bbe-8547-55e11e6914da
B0250.1_NP21	B0250.1	7.85296	1.30883	1.83236	4.71178	10441.7	1416.33	3439.7	5585.72	0.000924094	0.000532709	0.00084354	Missing_UTR	B0250.1.1	No miss exon.	No extra exon.	fddb4cfa-2cdf-4750-9963-e284c8f5c607
B0250.1_NP22	B0250.1	285.199	43.144	121.588	120.467	10441.7	1416.33	3439.7	5585.72	0.0304617	0.0353484	0.021567	Extra_UTR	B0250.1.1	No miss exon.	No extra exon.	ff360fcb-d3c2-47f2-93b7-af9264135d13
B0250.12_NP1	B0250.12	5.85968	5.85968	0	0	50.4154	45.5034	4.91203	0	0.128775	0	NA	5'missing	B0250.12	5 primer miss: exon 1 to 2	No extra exon.	15954f46-0f72-4d64-9e70-7df43940e762
B0250.12_NP1	B0250.12	34.3842	29.4722	4.91203	0	50.4154	45.5034	4.91203	0	0.647692	1	NA	5'extra	B0250.12	5 primer miss: exon 1 to 2	5 primer extra: exon 1 to 1	dec8a41a-a5dc-42cc-831d-655d680d0423
B0250.2_NP1	B0250.2	31.2222	16.8119	10.8077	3.60256	35.7772	19.5981	10.8077	5.37152	0.857837	1	0.670678	5'extra	B0250.2.1	No miss exon.	5 primer extra: exon 1 to 1	358fb607-972d-4527-be45-a706052150b5
B0250.3_NP1	B0250.3	5.41744	0.902907	2.70872	1.80581	22.5543	6.20979	7.51809	8.82638	0.145401	0.360294	0.204593	Extra_UTR	B0250.3	No miss exon.	No extra exon.	2b40509b-4f25-4f85-b9f9-f3d5f34fc12a
B0250.3_NP1	B0250.3	6.96529	1.39306	2.78611	2.78611	22.5543	6.20979	7.51809	8.82638	0.224332	0.370588	0.315658	5'missing	B0250.3	5 primer miss: exon 1 to 1	No extra exon.	eaf029e4-634e-460f-affb-8c44c77faf7a
B0250.5_NP1	B0250.5	11.5754	2.89386	0.723464	7.9581	338.215	82.2947	37.4374	218.482	0.0351646	0.0193246	0.0364245	New_junction	NA	NA	NA	0c4c817e-2146-406c-a44b-09c0aa3c2d3e
B0250.5_NP1	B0250.5	33.4442	8.72458	3.63524	21.0844	338.215	82.2947	37.4374	218.482	0.106016	0.0971018	0.0965038	5'missing	B0250.5.1	5 primer miss: exon 1 to 1	No extra exon.	94ec3241-a8ad-4fbb-a5f9-422271a8c760
B0250.5_NP2	B0250.5	6.79923	2.01459	1.00729	3.77735	338.215	82.2947	37.4374	218.482	0.0244802	0.0269061	0.017289	Missing_UTR	B0250.5.1	No miss exon.	No extra exon.	ecc34bc6-6d87-4ca6-86f6-0807684fd45f
B0250.5_NP3	B0250.5	137.525	34.058	14.6579	88.8096	338.215	82.2947	37.4374	218.482	0.413855	0.39153	0.406484	Extra_UTR	B0250.5.1	No miss exon.	No extra exon.	f67c781b-02bd-485d-aaae-79ec6909b4dc
B0250.7_NP1	B0250.7	5.30688	0	0.663361	4.64352	9.28705	0	1.80055	7.4865	NA	0.368421	0.620253	Extra_UTR	B0250.7c	No miss exon.	No extra exon.	910628c2-68bb-4e1b-b96e-1077adf15604
B0250.9_NP1	B0250.9	13.2672	6.63361	5.30688	1.32672	13.2672	6.63361	5.30688	1.32672	1	1	1	Extra_UTR	B0250.9.2	No miss exon.	No extra exon.	59b37b4f-3fd7-4fdc-8b8a-ad6ad0e381c4
B0252.1_NP1	B0252.1	7.4865	1.24775	4.991	1.24775	17.0578	4.06966	11.7404	1.24775	0.306598	0.425112	1	Missing_UTR	B0252.1.1	No miss exon.	No extra exon.	0dbb9ca9-affa-4697-8a5d-89dc615ad13e
B0252.2_NP1	B0252.2	9.33127	4.14723	3.11042	2.07362	90.217	43.5066	15.8027	30.377	0.0953241	0.196828	0.0682627	Intron_retention	B0252.2.1	Intron retention: intron 2 to 2	No extra exon.	1db87cf8-7165-4959-b03c-b858eca64dab
B0252.2_NP1	B0252.2	6.63361	4.9752	1.6584	0	90.217	43.5066	15.8027	30.377	0.114355	0.104944	0	3'missing	B0252.2.1	3 primer miss: exon 11 to 11	No extra exon.	a4aa480f-39ea-47d8-a664-a388d08e62dc
B0252.2_NP2	B0252.2	5.30688	1.32672	1.32672	2.65344	90.217	43.5066	15.8027	30.377	0.0304947	0.0839552	0.0873504	Intron_retention	B0252.2.1	5 primer miss: exon 1 to 1;Intron retention: intron 8 to 8	No extra exon.	aaa5438b-1414-473c-8058-319dcba7996f
B0252.2_NP3	B0252.2	5.74912	2.29965	2.29965	1.14982	90.217	43.5066	15.8027	30.377	0.0528575	0.145522	0.0378518	Intron_retention	B0252.2.1	Intron retention: intron 9 to 9	No extra exon.	be3e86f0-137e-4986-b848-2264c26f5741
B0252.3_NP1	B0252.3	37.8052	4.84682	14.5405	18.4179	64.2417	8.02812	29.1004	27.1132	0.603731	0.499666	0.679297	Extra_UTR	B0252.3c.2	No miss exon.	No extra exon.	4657a46e-4f02-4202-998c-fc0f17133165
B0252.3_NP1	B0252.3	8.06457	1.15208	4.03228	2.8802	64.2417	8.02812	29.1004	27.1132	0.143506	0.138565	0.106229	Extra_UTR	B0252.3a.1	No miss exon.	No extra exon.	d78e1882-15bc-44db-be26-6b4960367232
B0252.3_NP2	B0252.3	6.07449	0.506207	3.54345	2.02483	64.2417	8.02812	29.1004	27.1132	0.0630542	0.121766	0.0746805	Intron_retention	B0252.3c.2	Intron retention: intron 2 to 2	No extra exon.	ed32ca36-1219-4894-b323-b2f439a3ac9c
B0252.4_NP1	B0252.4	55.0169	29.7633	8.11725	17.1364	419.204	201.262	41.5805	176.362	0.147883	0.195218	0.0971662	5'missing	B0252.4b.1	5 primer miss: exon 1 to 1	No extra exon.	04ea8e2c-3efb-41e4-a540-922a0967cd46
B0252.4_NP1	B0252.4	5.16962	3.44641	0.215401	1.50781	419.204	201.262	41.5805	176.362	0.017124	0.00518033	0.00854949	Extra_UTR	B0252.4a.1	No miss exon.	No extra exon.	0d98406d-18f9-47c7-b90f-09b38c6c2777
B0252.4_NP2	B0252.4	97.8021	41.3526	11.815	44.6345	419.204	201.262	41.5805	176.362	0.205467	0.284148	0.253085	Extra_UTR	B0252.4b.1	No miss exon.	No extra exon.	17a70fbf-f16a-4634-8c36-4da4eac74daf
B0252.4_NP3	B0252.4	13.7749	8.44267	1.33305	3.99916	419.204	201.262	41.5805	176.362	0.0419487	0.0320595	0.0226759	3'missing	B0252.4a.1	3 primer miss: exon 4 to 4	No extra exon.	226e79c1-1342-4111-9355-56cbc5f84b8c
B0252.4_NP4	B0252.4	5.94512	4.57317	0	1.37195	419.204	201.262	41.5805	176.362	0.0227225	0	0.00777917	5'missing	B0252.4a.1	5 primer miss: exon 1 to 1	No extra exon.	4099ab62-f4ec-4d46-9380-33c0afebd9f0
B0252.4_NP5	B0252.4	184.26	83.264	15.4193	85.5769	419.204	201.262	41.5805	176.362	0.41371	0.370829	0.485234	Extra_UTR	B0252.4b.1	No miss exon.	No extra exon.	d78921a3-c79e-49b2-8cc7-13e651b6c604
B0252.5_NP1	B0252.5	6.63361	0	3.64848	2.98512	72.9697	0	25.6763	47.2934	NA	0.142096	0.0631192	3'missing	B0252.5.1	3 primer miss: exon 6 to 7	No extra exon.	3a69b454-4589-442d-adef-6003a41b5edb
B0252.5_NP1	B0252.5	7.29697	0	3.82222	3.47475	72.9697	0	25.6763	47.2934	NA	0.148862	0.0734721	3'missing	B0252.5.1	3 primer miss: exon 6 to 7	No extra exon.	74a81658-6c86-4b7c-8f37-fc2099d30e8c
B0252.5_NP2	B0252.5	6.63361	0	3.64848	2.98512	72.9697	0	25.6763	47.2934	NA	0.142096	0.0631192	Intron_retention	B0252.5.1	Intron retention: intron 2 to 2;3 primer miss: exon 6 to 7	No extra exon.	79e1d08b-177a-40e1-9ea6-7ffc399bda42
B0252.5_NP3	B0252.5	52.4055	0	14.5571	37.8484	72.9697	0	25.6763	47.2934	NA	0.566947	0.800289	3'missing	B0252.5.1	3 primer miss: exon 6 to 7	No extra exon.	fa2f629c-8a41-48f3-b269-c32f8817c1b4
B0252.8_NP1	B0252.8	11.2771	0	7.89399	3.38314	15.2573	0	11.8742	3.38314	NA	0.664804	1	Missing_UTR	B0252.8.1	No miss exon.	No extra exon.	45563710-6166-4945-a942-e853e616502f
B0261.1_NP1	B0261.1	6.93686	4.52404	0.904807	1.50801	86.6286	37.2564	9.61338	39.7588	0.12143	0.0941195	0.037929	5'missing	B0261.1.1	5 primer miss: exon 1 to 4	No extra exon.	814b7838-d3fe-4e61-9e4e-979f1f86b954
B0261.1_NP1	B0261.1	11.1066	5.90035	1.38832	3.81788	86.6286	37.2564	9.61338	39.7588	0.158372	0.144415	0.0960259	New_junction	NA	NA	NA	a36f8462-1b41-4bfa-80d8-102ae01d6cc4
B0261.1_NP2	B0261.1	44.0535	15.2284	3.80709	25.018	86.6286	37.2564	9.61338	39.7588	0.408745	0.39602	0.629244	3'extra	B0261.1.1	No miss exon.	3 primer extra: exon 10 to 10	a3e27ed7-b09a-48f3-aa6f-aee073170517
B0261.1_NP3	B0261.1	5.61013	3.57009	0.765018	1.27503	86.6286	37.2564	9.61338	39.7588	0.0958249	0.0795785	0.0320691	3'extra	B0261.1.1	5 primer miss: exon 1 to 4	3 primer extra: exon 6 to 6	b8e4f3e6-f7af-4872-b42b-5aa44879d629
B0261.2_NP1	B0261.2	9.28705	7.96033	0	1.32672	13.2672	7.96033	0.912121	4.39476	1	0	0.301887	Extra_UTR	B0261.2a.1	No miss exon.	No extra exon.	c5700c9b-a0ef-44cf-87e9-37f9dc71bdb3
B0261.4_NP1	B0261.4	8.53122	2.22554	2.59646	3.70923	447.105	124.552	73.5155	247.711	0.0178683	0.0353185	0.014974	5'missing	B0261.4a.1	5 primer miss: exon 1 to 1	No extra exon.	48b193b9-ab3b-4895-b531-1d383c24efed
B0261.4_NP1	B0261.4	7.00549	1.4011	2.10165	3.50274	447.105	124.552	73.5155	247.711	0.0112491	0.0285878	0.0141405	5'extra	B0261.4a.1	5 primer miss: exon 1 to 1	5 primer extra: exon 1 to 1	4feda5c8-2d09-439e-87e2-850115678ce7
B0261.4_NP2	B0261.4	9.47198	3.59282	2.28634	3.59282	447.105	124.552	73.5155	247.711	0.028846	0.0311001	0.0145041	Intron_retention	B0261.4a.1	Intron retention: intron 3 to 3	No extra exon.	5813302a-a668-4ff8-92f0-9f1caa90fa02
B0261.4_NP3	B0261.4	9.673	3.22433	1.84248	4.60619	447.105	124.552	73.5155	247.711	0.0258875	0.0250624	0.018595	Intron_retention	B0261.4a.1	Intron retention: intron 2 to 2	No extra exon.	92bcc85b-bf5b-4910-a755-22281a9bca44
B0261.4_NP4	B0261.4	200.088	61.7413	37.7308	100.615	447.105	124.552	73.5155	247.711	0.495708	0.513236	0.406181	Missing_UTR	B0261.4a.1	No miss exon.	No extra exon.	b6a3d68a-a1a1-41b6-85ba-9face3177b40
B0261.4_NP5	B0261.4	189.474	45.383	21.5569	122.534	447.105	124.552	73.5155	247.711	0.36437	0.293229	0.494665	Missing_UTR	B0261.4a.1	No miss exon.	No extra exon.	ca729b79-1de2-4a4d-97b0-19d47d7437ca
B0261.4_NP6	B0261.4	5.93406	1.97802	0.65934	3.2967	447.105	124.552	73.5155	247.711	0.0158811	0.00896873	0.0133087	Intron_retention	B0261.4a.1	5 primer miss: exon 1 to 1;Intron retention: intron 3 to 3	No extra exon.	e50ef055-bb31-4748-bb1a-7d27a4335116
B0261.6_NP1	B0261.6	21.3602	0	6.74533	14.6149	123.252	0	15.6276	107.625	NA	0.43163	0.135795	Extra_UTR	B0261.6b.1	No miss exon.	No extra exon.	0746c813-6b36-4e93-9bae-0541220d05b6
B0261.6_NP1	B0261.6	98.9734	0	8.88223	90.0912	123.252	0	15.6276	107.625	NA	0.56837	0.837085	Missing_UTR	B0261.6a.1	No miss exon.	No extra exon.	75affbe2-b4bd-4200-9bef-7eb1f2e9e471
B0261.7_NP1	B0261.7	14.151	7.82029	1.11718	5.21352	524.017	141.167	33.7822	349.068	0.0553975	0.0330702	0.0149356	Intron_retention	B0261.7.1	Intron retention: intron 3 to 3;3 primer miss: exon 6 to 6	No extra exon.	1933aa90-c991-4f34-8331-d1485ea2e78e
B0261.7_NP1	B0261.7	15.8505	5.37784	1.13218	9.34045	524.017	141.167	33.7822	349.068	0.0380956	0.0335139	0.0267583	3'missing	B0261.7.1	3 primer miss: exon 6 to 6	No extra exon.	194e17b7-9da4-49be-8b2b-2e716827c18e
B0261.7_NP2	B0261.7	9.73592	2.92077	0.486796	6.32834	524.017	141.167	33.7822	349.068	0.0206902	0.0144098	0.0181293	5'missing	B0261.7.1	5 primer miss: exon 1 to 1	No extra exon.	2775dec9-b2b7-4d56-84a4-103bfe5bf399
B0261.7_NP3	B0261.7	23.9524	6.93358	1.89098	15.1278	524.017	141.167	33.7822	349.068	0.0491162	0.0559755	0.0433378	Intron_retention	B0261.7.1	Intron retention: intron 3 to 3	No extra exon.	37046f2b-167a-4a7e-a147-5203a25dfab4
B0261.7_NP4	B0261.7	9.84547	3.08878	0.579145	6.17755	524.017	141.167	33.7822	349.068	0.0218803	0.0171435	0.0176973	Extra_UTR	B0261.7.1	No miss exon.	No extra exon.	3e697067-8cfb-4c78-b31c-13f6b0413126
B0261.7_NP5	B0261.7	99.0438	16.2748	3.71995	79.049	524.017	141.167	33.7822	349.068	0.115288	0.110116	0.226458	Extra_UTR	B0261.7.1	No miss exon.	No extra exon.	5504dcb2-965c-4166-ae29-53b2d067f44b
B0261.7_NP6	B0261.7	6.29403	3.35681	0.419602	2.51761	524.017	141.167	33.7822	349.068	0.0237791	0.0124208	0.00721239	Intron_retention	B0261.7.1	Intron retention: intron 2 to 2;3 primer miss: exon 6 to 6	No extra exon.	78d6adfc-530a-412b-af91-de1b27faa071
B0261.7_NP7	B0261.7	5.66946	3.0119	0.531512	2.12605	524.017	141.167	33.7822	349.068	0.0213358	0.0157335	0.00609065	3'missing	B0261.7.1	3 primer miss: exon 5 to 6	No extra exon.	a5fca124-34bd-4160-85bf-d21ef24bdec0
B0261.7_NP8	B0261.7	5.65388	2.17457	0.869828	2.60948	524.017	141.167	33.7822	349.068	0.0154043	0.0257481	0.00747558	Missing_UTR	B0261.7.1	No miss exon.	No extra exon.	c3d60ca9-de50-40b2-85d5-401fbe0e8f79
B0261.7_NP9	B0261.7	17.9174	6.23213	1.16852	10.5167	524.017	141.167	33.7822	349.068	0.0441473	0.0345899	0.030128	Intron_retention	B0261.7.1	Intron retention: intron 2 to 2	No extra exon.	db82d712-259c-495d-bebe-c5c8dce0d04b
B0261.7_NP10	B0261.7	240.407	64.3035	17.5373	158.567	524.017	141.167	33.7822	349.068	0.455515	0.519129	0.454258	Extra_UTR	B0261.7.1	No miss exon.	No extra exon.	dce28a6f-2719-4195-b346-8bf95dda5051
B0261.8_NP1	B0261.8	12.9924	7.42422	3.71211	1.85606	116.142	67.5094	23.3185	25.3139	0.109973	0.159192	0.0733216	5'missing	B0261.8.1	5 primer miss: exon 1 to 1	No extra exon.	323c5c5f-09ca-4a63-a84a-f50670729af7
B0261.8_NP1	B0261.8	49.035	28.2894	8.80115	11.9444	116.142	67.5094	23.3185	25.3139	0.419044	0.377432	0.471852	Extra_UTR	B0261.8.1	No miss exon.	No extra exon.	6e997dfe-3fb1-4ee0-be00-5c57805e414f
B0261.8_NP2	B0261.8	12.5501	7.84384	3.66046	1.04585	116.142	67.5094	23.3185	25.3139	0.116189	0.156977	0.0413151	5'missing	B0261.8.1	5 primer miss: exon 1 to 1	No extra exon.	cb38d5a0-3dc7-46d4-be5a-64550b7e7c54
B0272.1_NP1	B0272.1	5.87074	4.89228	0.489228	0.489228	100.377	80.3759	14.8693	5.13236	0.0608676	0.032902	0.0953223	5'missing	B0272.1.1	5 primer miss: exon 1 to 4	No extra exon.	2020a24b-a251-4c36-897e-924fc6387690
B0272.1_NP1	B0272.1	65.2415	53.2233	9.44285	2.57532	100.377	80.3759	14.8693	5.13236	0.66218	0.635059	0.501781	Extra_UTR	B0272.1.1	No miss exon.	No extra exon.	ff4a056b-c1f9-49d8-814e-5ca932fb4eaa
B0272.2_NP1	B0272.2	14.0411	12.421	0.540043	1.08009	67.4195	52.183	6.01193	9.22463	0.238028	0.0898287	0.117087	Missing_UTR	B0272.2.1	No miss exon.	No extra exon.	478a5cb8-368f-4336-9c7c-01fec59ff7cf
B0272.2_NP1	B0272.2	20.8737	10.4369	3.13106	7.30581	67.4195	52.183	6.01193	9.22463	0.200005	0.520808	0.79199	Missing_UTR	B0272.2.1	No miss exon.	No extra exon.	ee01811b-9779-4488-b263-ba7ecac7066f
B0272.2_NP2	B0272.2	24.3232	21.807	1.67746	0.838732	67.4195	52.183	6.01193	9.22463	0.417895	0.279022	0.0909231	3'missing	B0272.2.1	3 primer miss: exon 6 to 6	No extra exon.	eebb2104-e507-4a5b-add0-6bed6e65b117
B0272.3_NP1	B0272.3	9.10255	5.99436	1.33208	1.77611	265.54	142.663	50.3716	72.5055	0.0420176	0.0264451	0.0244962	3'missing	B0272.3.1	3 primer miss: exon 3 to 4	No extra exon.	1a412e00-2b0d-4dcc-9567-00e977452b9d
B0272.3_NP1	B0272.3	10.1177	6.66848	1.14974	2.29948	265.54	142.663	50.3716	72.5055	0.0467428	0.0228251	0.0317145	5'missing	B0272.3.1	5 primer miss: exon 1 to 1	No extra exon.	30043d04-b83f-41ee-b42d-44828fbd3926
B0272.3_NP2	B0272.3	17.7931	8.67958	2.1699	6.94367	265.54	142.663	50.3716	72.5055	0.0608397	0.0430778	0.0957674	Missing_UTR	B0272.3.1	No miss exon.	No extra exon.	89480fff-4813-4f74-b135-a3ab6a3eee5c
B0272.3_NP3	B0272.3	14.6507	9.08341	1.46507	4.10218	265.54	142.663	50.3716	72.5055	0.0636703	0.0290851	0.0565775	3'missing	B0272.3.1	3 primer miss: exon 4 to 4	No extra exon.	b257b2dc-c668-44fe-8046-915bffc562f1
B0272.3_NP4	B0272.3	5.00981	2.76404	0.518257	1.72752	265.54	142.663	50.3716	72.5055	0.0193746	0.0102887	0.0238261	New_junction	NA	NA	NA	da2c6726-b91d-4da5-ac40-51e15e561c02
B0272.4_NP1	B0272.4	8.97748	5.77124	2.56499	0.641248	138.984	72.7971	33.8438	32.3425	0.0792783	0.0757892	0.0198268	3'missing	B0272.4.1	3 primer miss: exon 6 to 6	No extra exon.	1bd6237b-e4e3-4cb1-b781-62bd2c374642
B0272.4_NP1	B0272.4	5.08576	2.54288	0.847627	1.69525	138.984	72.7971	33.8438	32.3425	0.0349311	0.0250453	0.0524156	Extra_UTR	B0272.4.1	No miss exon.	No extra exon.	e8d33f0a-c3b9-4f13-a1af-bd13ddd16162
B0272.4_NP2	B0272.4	103.364	55.2059	21.1427	27.0156	138.984	72.7971	33.8438	32.3425	0.758352	0.624713	0.835297	Missing_UTR	B0272.4.1	No miss exon.	No extra exon.	f4898642-b467-4acf-bf6c-b1546a8cedfb
B0273.1_NP1	B0273.1	30.5146	0	8.32216	22.1924	45.1085	0	9.64888	35.4596	NA	0.8625	0.62585	5'missing	B0273.1a.1	5 primer miss: exon 1 to 1	No extra exon.	17fcb316-e36a-4c2c-86ef-fcfc53d7621b
B0273.1_NP1	B0273.1	14.5939	0	1.32672	13.2672	45.1085	0	9.64888	35.4596	NA	0.1375	0.37415	Extra_UTR	B0273.1a.1	No miss exon.	No extra exon.	34695147-3e84-4b18-8dfb-8b4d1fcd0f45
B0273.2_NP1	B0273.2	22.4474	6.67355	3.03343	12.7404	184.853	47.734	18.2008	118.918	0.139807	0.166664	0.107136	5'missing	B0273.2.1	5 primer miss: exon 1 to 1	No extra exon.	099a2871-5608-4e51-802c-60b8e79c9095
B0273.2_NP1	B0273.2	17.2195	7.89226	3.58739	5.73982	184.853	47.734	18.2008	118.918	0.165338	0.1971	0.0482671	Missing_UTR	B0273.2.1	No miss exon.	No extra exon.	ba0adf12-46be-4c1a-b8a4-43a2622dedba
B0273.2_NP2	B0273.2	94.0903	21.0892	7.02974	65.9714	184.853	47.734	18.2008	118.918	0.441807	0.386231	0.554764	Extra_UTR	B0273.2.1	No miss exon.	No extra exon.	c0de994d-f258-4af3-beb5-f4ad1c1a5d4f
B0273.2_NP3	B0273.2	5.20001	1.3	0.650001	3.25001	184.853	47.734	18.2008	118.918	0.0272343	0.0357127	0.0273298	Extra_UTR	B0273.2.1	No miss exon.	No extra exon.	e3c6fe1e-6075-4096-9ce8-107e614437de
B0273.3_NP1	B0273.3	15.6995	1.04664	1.04664	13.6063	23.881	3.3684	1.93112	18.5815	0.310722	0.541985	0.732249	Missing_UTR	B0273.3.1	No miss exon.	No extra exon.	6862fdbd-a07f-4969-9540-c45cfff878c0
B0273.4_NP1	B0273.4	10.459	7.94883	2.0918	0.418359	70.3162	52.4147	14.0482	3.85329	0.151653	0.148901	0.108572	Missing_UTR	B0273.4c.1	No miss exon.	No extra exon.	1693506a-c5d2-4f0c-b3eb-8e9af42aabd6
B0273.4_NP1	B0273.4	6.47882	4.77387	1.70495	0	70.3162	52.4147	14.0482	3.85329	0.0910788	0.121364	0	3'missing	B0273.4f.1	3 primer miss: exon 4 to 4	No extra exon.	4617e206-4062-4baa-b916-45693176872a
B0273.4_NP2	B0273.4	19.3038	13.7884	3.86076	1.65461	70.3162	52.4147	14.0482	3.85329	0.263064	0.274822	0.429402	5'missing	B0273.4a.1	5 primer miss: exon 1 to 1	No extra exon.	67e6412f-eff1-467f-b737-4b8073e8a291
B0273.4_NP3	B0273.4	5.28477	4.47173	0.813042	0	70.3162	52.4147	14.0482	3.85329	0.0853144	0.0578751	0	5'missing	B0273.4f.1	5 primer miss: exon 1 to 1	No extra exon.	857736de-816c-442d-9cf3-b1a3688ea6cd
B0273.4_NP4	B0273.4	21.9572	16.0228	4.15407	1.78032	70.3162	52.4147	14.0482	3.85329	0.305694	0.295701	0.462025	Extra_UTR	B0273.4a.1	No miss exon.	No extra exon.	8bab8d4f-eccb-4f9f-8c7e-4ada774a358e
B0280.1_NP1	B0280.1	32.144	10.1789	6.96453	15.0005	270.158	72.2552	75.1743	121.402	0.140875	0.0926452	0.123561	5'missing	B0280.1a.1	5 primer miss: exon 1 to 2	No extra exon.	17a3bc0c-8905-49e4-9853-bf83902f17a3
B0280.1_NP1	B0280.1	7.49541	1.72971	4.61256	1.15314	270.158	72.2552	75.1743	121.402	0.0239389	0.0613582	0.00949855	5'missing	B0280.1a.1	5 primer miss: exon 1 to 3	No extra exon.	423a7669-f7fb-47a2-9b99-a7db9facc9e9
B0280.1_NP2	B0280.1	7.97555	2.45402	3.06752	2.45402	270.158	72.2552	75.1743	121.402	0.0339632	0.0408055	0.020214	Extra_UTR	B0280.1a.1	No miss exon.	No extra exon.	49c943ee-7e62-4a33-a0b9-efa2f1850482
B0280.1_NP3	B0280.1	35.2397	11.0124	7.70868	16.5186	270.158	72.2552	75.1743	121.402	0.15241	0.102544	0.136066	New_junction	NA	NA	NA	6a241245-23a3-47cf-9f00-791d0d380b7a
B0280.1_NP4	B0280.1	5.1231	1.92116	2.24136	0.960582	270.158	72.2552	75.1743	121.402	0.0265886	0.0298155	0.00791243	Intron_retention	B0280.1a.1	Intron retention: intron 4 to 4	No extra exon.	86428122-14eb-4c46-8eb2-c4e84297979e
B0280.1_NP5	B0280.1	7.61334	2.34257	3.51385	1.75692	270.158	72.2552	75.1743	121.402	0.0324207	0.0467427	0.014472	Intron_retention	B0280.1a.1	Intron retention: intron 5 to 5	No extra exon.	994cd2fe-75e7-46f7-9758-95a478b2be88
B0280.1_NP6	B0280.1	23.7109	8.17617	8.17617	7.35855	270.158	72.2552	75.1743	121.402	0.113157	0.108763	0.0606133	3'missing	B0280.1b.1	5 primer miss: exon 1 to 5;3 primer miss: exon 2 to 6	No extra exon.	e6e17f18-29f4-4465-9101-886e871fa8c6
B0280.1_NP7	B0280.1	134.014	30.1532	31.2699	72.5909	270.158	72.2552	75.1743	121.402	0.417315	0.415966	0.59794	Extra_UTR	B0280.1a.1	No miss exon.	No extra exon.	fa91d753-7c6c-4c6f-99c2-03aed9efaac2
B0280.10_NP1	B0280.10	7.47735	4.48641	0.747735	2.24321	148.744	79.484	10.8184	58.4416	0.0564442	0.0691167	0.0383837	Intron_retention	B0280.10a.1	Intron retention: intron 2 to 2;3 primer miss: exon 10 to 10	No extra exon.	1a5f19bc-757b-4cb0-a353-b390236cd233
B0280.10_NP1	B0280.10	26.2338	12.3138	1.60615	12.3138	148.744	79.484	10.8184	58.4416	0.154922	0.148464	0.210703	3'missing	B0280.10a.1	3 primer miss: exon 6 to 10	No extra exon.	4c4f2b5b-f92d-4ec0-91e5-7ae352810e68
B0280.10_NP2	B0280.10	57.0083	33.2548	5.93836	17.8151	148.744	79.484	10.8184	58.4416	0.418384	0.548911	0.304836	3'missing	B0280.10a.1	3 primer miss: exon 10 to 10	No extra exon.	50c65f5d-af02-4969-98b7-0abc76910c70
B0280.10_NP3	B0280.10	14.8572	6.45964	0.645964	7.75157	148.744	79.484	10.8184	58.4416	0.0812697	0.0597096	0.132638	New_junction	NA	NA	NA	7159053e-9365-47d0-ad5b-8cd9eb464268
B0280.10_NP4	B0280.10	25.5704	12.0025	1.56554	12.0025	148.744	79.484	10.8184	58.4416	0.151005	0.14471	0.205375	3'missing	B0280.10a.1	3 primer miss: exon 6 to 10	No extra exon.	7f58c94b-a5a7-4ede-ad44-dee0ec9f4c63
B0280.13_NP1	B0280.13	12.6038	1.1458	6.87483	4.58322	15.9207	2.25141	9.08603	4.58322	0.508929	0.756637	1	Extra_UTR	B0280.13.1	No miss exon.	No extra exon.	aab7c8d1-0e6a-4280-acb7-7be5444d0d37
B0280.17_NP1	B0280.17	55.5012	0	6.1668	49.3344	61.9136	0	8.26744	53.6462	NA	0.745914	0.919624	Extra_UTR	B0280.17.1	No miss exon.	No extra exon.	1d55bea8-8dd1-4d06-998c-1ceffc5c8bbf
B0280.3_NP1	B0280.3	32.4937	5.15772	13.9259	13.4101	406.308	70.4555	172.926	162.927	0.0732054	0.0805308	0.0823073	5'missing	B0280.3.1	5 primer miss: exon 1 to 1	No extra exon.	2228cc8f-a8d5-4685-b9fc-457d612c9d79
B0280.3_NP1	B0280.3	34.0526	3.7245	17.0263	13.3018	406.308	70.4555	172.926	162.927	0.0528631	0.09846	0.0816426	Extra_UTR	B0280.3.1	No miss exon.	No extra exon.	633f9764-fcde-441d-8bde-e928a70928f1
B0280.3_NP2	B0280.3	10.8223	2.16446	4.32892	4.32892	406.308	70.4555	172.926	162.927	0.0307209	0.0250334	0.0265697	Intron_retention	B0280.3.1	Intron retention: intron 2 to 2	No extra exon.	6ba91bf4-178d-4768-b2a5-470beba5fc20
B0280.3_NP3	B0280.3	18.3364	6.36162	5.98741	5.98741	406.308	70.4555	172.926	162.927	0.0902927	0.0346242	0.036749	5'missing	B0280.3.1	5 primer miss: exon 1 to 1	No extra exon.	755e534d-19a9-4d42-89e9-e4695ac518ae
B0280.3_NP4	B0280.3	26.1633	5.68766	13.6504	6.8252	406.308	70.4555	172.926	162.927	0.080727	0.0789379	0.0418911	3'extra	B0280.3.1	5 primer miss: exon 1 to 3;3 primer miss: exon 2 to 4	5 primer extra: exon 1 to 9;3 primer extra: exon 2 to 10	db164039-b8c6-4264-89c4-854ef75a627a
B0280.4_NP1	B0280.4	5.74912	5.03048	0	0.718641	8.84481	8.12617	0	0.718641	0.619048	NA	1	Extra_UTR	B0280.4.1	No miss exon.	No extra exon.	0666a43e-bfb5-45d5-a8bd-cf16d3df2907
B0280.5_NP1	B0280.5	100.135	6.14324	7.16711	86.8244	2619.96	130.904	163.431	2325.62	0.0469293	0.043854	0.0373339	5'missing	B0280.5.1	5 primer miss: exon 1 to 2	No extra exon.	126746f6-d268-4f44-a4ae-898bea11bc65
B0280.5_NP1	B0280.5	314.841	12.3583	16.1834	286.3	2619.96	130.904	163.431	2325.62	0.0944069	0.0990229	0.123107	5'missing	B0280.5.1	5 primer miss: exon 1 to 1	No extra exon.	173fa569-e4af-448c-82a7-07b20a98b3fe
B0280.5_NP2	B0280.5	60.0452	4.28894	6.43341	49.3228	2619.96	130.904	163.431	2325.62	0.032764	0.0393646	0.0212085	3'missing	B0280.5.1	5 primer miss: exon 1 to 1;3 primer miss: exon 5 to 5	No extra exon.	25e93ee7-511f-42d9-99eb-e618aac9328e
B0280.5_NP3	B0280.5	7.77513	0.888587	0.555367	6.33118	2619.96	130.904	163.431	2325.62	0.00678807	0.00339817	0.00272236	3'missing	B0280.5.1	5 primer miss: exon 1 to 1;3 primer miss: exon 4 to 5	No extra exon.	3509d7c2-1c90-4d07-8f94-7931312e3445
B0280.5_NP4	B0280.5	7.77724	1.41404	0.471348	5.89185	2619.96	130.904	163.431	2325.62	0.0108021	0.00288407	0.00253345	5'missing	B0280.5.1	5 primer miss: exon 1 to 1	No extra exon.	424e376d-8d30-405e-93b3-f05381f4fe35
B0280.5_NP5	B0280.5	110.926	6.73354	11.6951	92.4975	2619.96	130.904	163.431	2325.62	0.0514387	0.0715597	0.0397733	3'missing	B0280.5.1	3 primer miss: exon 5 to 5	No extra exon.	4e284102-09be-48d9-a5e6-53c15d350093
B0280.5_NP6	B0280.5	24.2677	3.10087	2.56159	18.6052	2619.96	130.904	163.431	2325.62	0.0236881	0.0156738	0.00800012	5'extra	B0280.5.1	No miss exon.	5 primer extra: exon 1 to 1	5e666362-1988-4004-9af3-ab70fb9a1e2c
B0280.5_NP7	B0280.5	530.07	19.0494	26.9176	484.103	2619.96	130.904	163.431	2325.62	0.145522	0.164703	0.208161	Intron_retention	B0280.5.1	Intron retention: intron 2 to 2	No extra exon.	62a6a43a-1f9e-45b4-a942-91d4e46d8adf
B0280.5_NP8	B0280.5	269.397	9.92515	13.3281	246.144	2619.96	130.904	163.431	2325.62	0.07582	0.0815515	0.10584	Intron_retention	B0280.5.1	Intron retention: intron 2 to 2;3 primer miss: exon 5 to 5	No extra exon.	73b59091-09bf-4175-ba64-c325149ca1a1
B0280.5_NP9	B0280.5	8.32161	1.12454	1.01209	6.18498	2619.96	130.904	163.431	2325.62	0.00859058	0.00619275	0.0026595	3'missing	B0280.5.1	3 primer miss: exon 5 to 5	No extra exon.	7a9684e7-8596-4d01-933e-5a3f8f199b37
B0280.5_NP10	B0280.5	403.748	26.4358	28.2383	349.073	2619.96	130.904	163.431	2325.62	0.201948	0.172784	0.150099	5'missing	B0280.5.1	5 primer miss: exon 1 to 1	No extra exon.	8955e7c8-7b7b-4085-9932-9ab6df7a220c
B0280.5_NP11	B0280.5	100.536	7.27866	7.0512	86.2066	2619.96	130.904	163.431	2325.62	0.055603	0.0431448	0.0370682	5'missing	B0280.5.1	5 primer miss: exon 1 to 2	No extra exon.	a1117f8e-aeed-4971-b158-a10519bc5628
B0280.5_NP12	B0280.5	13.7723	1.09304	1.09304	11.5862	2619.96	130.904	163.431	2325.62	0.00834991	0.00668807	0.00498199	3'missing	B0280.5.1	5 primer miss: exon 1 to 1;3 primer miss: exon 5 to 5	No extra exon.	a93844dd-9283-4d65-b22b-2aca80fbb734
B0280.5_NP13	B0280.5	27.0483	1.85626	1.3259	23.8661	2619.96	130.904	163.431	2325.62	0.0141803	0.00811287	0.0102623	Intron_retention	B0280.5.1	5 primer miss: exon 1 to 1;Intron retention: intron 3 to 3	No extra exon.	b80884af-2628-449d-b3e9-973e36b96320
B0280.5_NP14	B0280.5	70.6699	5.33838	6.101	59.2305	2619.96	130.904	163.431	2325.62	0.0407808	0.0373307	0.0254687	Intron_retention	B0280.5.1	Intron retention: intron 3 to 3	No extra exon.	cfb1283e-da04-4fbc-9e48-77d62e0a3a05
B0280.5_NP15	B0280.5	15.7367	2.57509	1.85979	11.3018	2619.96	130.904	163.431	2325.62	0.0196716	0.0113796	0.00485969	3'missing	B0280.5.1	5 primer miss: exon 1 to 1;3 primer miss: exon 5 to 5	No extra exon.	da4068a2-819b-428c-93ed-cac52079340d
B0280.5_NP16	B0280.5	8.57416	1.10634	0.921953	6.54587	2619.96	130.904	163.431	2325.62	0.00845155	0.00564123	0.00281467	5'missing	B0280.5.1	5 primer miss: exon 1 to 1	Intron extra: intron 2 to 2	e3c747ef-df4d-4391-b4e1-e2926a6d23d9
B0280.8_NP1	B0280.8	25.9856	13.6425	5.19713	7.14605	195.135	87.8251	38.7348	68.5746	0.155337	0.134172	0.104208	5'extra	B0280.8.1	5 primer miss: exon 1 to 1	5 primer extra: exon 1 to 1	64e87365-46c7-4193-8e5b-aedda7809016
B0280.8_NP1	B0280.8	8.93728	4.28989	1.42996	3.21742	195.135	87.8251	38.7348	68.5746	0.0488458	0.0369168	0.0469185	Intron_retention	B0280.8.1	Intron retention: intron 2 to 2;3 primer miss: exon 6 to 7	No extra exon.	683728b8-1ce8-4a4a-aff2-c497d0823e8e
B0280.8_NP2	B0280.8	10.3746	4.24414	2.35785	3.77257	195.135	87.8251	38.7348	68.5746	0.0483249	0.0608717	0.055014	Intron_retention	B0280.8.1	Intron retention: intron 4 to 4	No extra exon.	76023000-0037-490c-ad68-eab394c80b36
B0280.8_NP3	B0280.8	97.6065	40.9599	20.9157	35.7309	195.135	87.8251	38.7348	68.5746	0.46638	0.539971	0.521052	Extra_UTR	B0280.8.1	No miss exon.	No extra exon.	a073d873-d4d9-4984-aceb-00d543d5ea13
B0280.8_NP4	B0280.8	10.5072	5.44819	0.778313	4.28072	195.135	87.8251	38.7348	68.5746	0.0620346	0.0200934	0.0624243	Intron_retention	B0280.8.1	Intron retention: intron 2 to 2	No extra exon.	b21230af-0219-4b83-911d-1b409bd86310
B0280.9_NP1	B0280.9	70.7001	25.5057	8.50191	36.6924	240.07	93.914	29.4512	116.705	0.271586	0.288678	0.314403	Intron_retention	B0280.9.1	Intron retention: intron 6 to 6	No extra exon.	19358a58-591d-4116-b862-15d84d5a2453
B0280.9_NP1	B0280.9	6.68577	3.03899	1.2156	2.43119	240.07	93.914	29.4512	116.705	0.0323593	0.041275	0.0208319	Intron_retention	B0280.9.1	Intron retention: intron 2 to 2;Intron retention: intron 4 to 4	No extra exon.	3eb773be-16c4-4fc4-a1f7-8d6eaa99f933
B0280.9_NP2	B0280.9	10.6659	5.53049	0.395035	4.74042	240.07	93.914	29.4512	116.705	0.0588888	0.0134132	0.0406188	5'missing	B0280.9.1	5 primer miss: exon 1 to 1	No extra exon.	621a57ef-82ff-445e-8352-d47332e346a1
B0280.9_NP3	B0280.9	76.0069	27.0454	11.1912	37.7703	240.07	93.914	29.4512	116.705	0.287981	0.379992	0.323639	Intron_retention	B0280.9.1	Intron retention: intron 2 to 2	No extra exon.	734e19fc-6767-470a-a533-ffcc71b8420f
B0280.9_NP4	B0280.9	46.3768	17.5283	5.47758	23.371	240.07	93.914	29.4512	116.705	0.186642	0.185989	0.200257	Extra_UTR	B0280.9.1	No miss exon.	No extra exon.	b7b61167-b9cf-4fd5-ad9b-c2bb8ef11266
B0281.3_NP1	B0281.3	6.41248	0	5.61092	0.801561	20.7853	0	19.9837	0.801561	NA	0.280775	1	5'missing	B0281.3.1	5 primer miss: exon 1 to 1	No extra exon.	7c5c014e-74d4-4daf-97aa-2df16af6c3aa
B0281.5_NP1	B0281.5	9.85626	9.663	0.19326	0	451.853	436.668	2.71006	12.4747	0.0221289	0.071312	0	Extra_UTR	B0281.5a.1	No miss exon.	No extra exon.	128f0d42-622f-4a63-98e2-499f817cb637
B0281.5_NP1	B0281.5	124.52	119.836	0.390344	4.29378	451.853	436.668	2.71006	12.4747	0.274432	0.144035	0.3442	Extra_UTR	B0281.5a.1	No miss exon.	No extra exon.	29ae25ae-46d2-4afc-802c-3500a85f4770
B0281.5_NP2	B0281.5	7.36865	7.21187	0.15678	0	451.853	436.668	2.71006	12.4747	0.0165157	0.057851	0	Missing_UTR	B0281.5a.1	No miss exon.	No extra exon.	41c6967f-7ab5-4568-9152-a7507ea7348e
B0281.5_NP3	B0281.5	8.39318	8.08232	0.310858	0	451.853	436.668	2.71006	12.4747	0.0185091	0.114705	0	Extra_UTR	B0281.5b.1	No miss exon.	No extra exon.	5bf93844-25d7-4391-b0b7-6d3db4005d74
B0281.5_NP4	B0281.5	15.3969	15.1636	0.233286	0	451.853	436.668	2.71006	12.4747	0.0347257	0.0860815	0	5'missing	B0281.5a.1	5 primer miss: exon 1 to 1	No extra exon.	64094c2c-c12a-495f-951b-d785191f7cef
B0281.5_NP5	B0281.5	14.5702	14.5702	0	0	451.853	436.668	2.71006	12.4747	0.0333669	0	0	5'missing	B0281.5a.1	5 primer miss: exon 1 to 1	No extra exon.	b4833879-5a63-4362-ae9b-111d0b9f3278
B0281.5_NP6	B0281.5	5.05268	4.833	0.219682	0	451.853	436.668	2.71006	12.4747	0.0110679	0.0810616	0	5'extra	B0281.5a.1	3 primer miss: exon 3 to 4	5 primer extra: exon 1 to 2	c94a9e7e-a863-4f84-bcb0-9d53c7cbd352
B0281.5_NP7	B0281.5	12.2775	12.0414	0.236106	0	451.853	436.668	2.71006	12.4747	0.0275757	0.087122	0	3'missing	B0281.5a.1	3 primer miss: exon 4 to 4	No extra exon.	d477dc9d-b2e2-40e3-bf01-00aa816e9b4f
B0281.5_NP8	B0281.5	12.3644	12.1266	0.237777	0	451.853	436.668	2.71006	12.4747	0.0277708	0.0877385	0	Intron_retention	B0281.5a.1	Intron retention: intron 2 to 2	No extra exon.	e1d7e42e-05ff-4309-a8c6-6951fc983d7b
B0281.5_NP9	B0281.5	122.087	117.509	0.381523	4.19675	451.853	436.668	2.71006	12.4747	0.269104	0.14078	0.336422	Extra_UTR	B0281.5a.1	No miss exon.	No extra exon.	f00efcbc-f400-47e4-a93f-c738bfeeb877
B0281.6_NP1	B0281.6	5.97024	0	4.7762	1.19405	6.63361	0	5.43956	1.19405	NA	0.878049	1	Extra_UTR	B0281.6.1	No miss exon.	No extra exon.	4bd2056e-8638-4207-a935-96c72be8e660
B0284.3_NP1	B0284.3	32.9469	26.7694	2.74558	3.43197	96.4084	79.7181	6.84183	9.8485	0.3358	0.401292	0.348476	3'missing	B0284.3.1	5 primer miss: exon 1 to 2;3 primer miss: exon 2 to 3	No extra exon.	4c15cc0a-d2c7-4804-9468-a429d8815dce
B0284.3_NP1	B0284.3	55.9434	47.0635	3.55196	5.32794	96.4084	79.7181	6.84183	9.8485	0.590374	0.519154	0.54099	3'missing	B0284.3.1	5 primer miss: exon 1 to 2;3 primer miss: exon 2 to 3	No extra exon.	90681ea7-00a1-4812-abdb-9cb36c160b8e
B0284.3_NP2	B0284.3	7.07585	5.44296	0.544296	1.08859	96.4084	79.7181	6.84183	9.8485	0.0682776	0.0795541	0.110534	3'missing	B0284.3.1	5 primer miss: exon 1 to 2;3 primer miss: exon 2 to 3	No extra exon.	afb780d6-fae0-4d37-955d-957f58572a25
B0284.5_NP1	B0284.5	5.97024	0	5.97024	0	6.63361	0	6.63361	0	NA	0.9	NA	3'missing	B0284.5	3 primer miss: exon 3 to 3	No extra exon.	677b6e65-d00c-4a67-a5c3-9546a34e096a
B0285.1_NP1	B0285.1	12.8097	6.81367	1.36273	4.6333	136.652	70.611	15.3099	50.7313	0.0964959	0.0890098	0.0913301	Extra_UTR	B0285.1a.1	No miss exon.	No extra exon.	06d3fdca-d290-4ea0-bbb7-af5a037a52b1
B0285.1_NP1	B0285.1	5.18106	2.7898	0.664238	1.72702	136.652	70.611	15.3099	50.7313	0.0395094	0.0433861	0.0340424	3'missing	B0285.1a.1	5 primer miss: exon 1 to 2;3 primer miss: exon 15 to 15	No extra exon.	0bacf0b8-d81a-4562-8f90-79d9839e23b4
B0285.1_NP2	B0285.1	5.18106	2.7898	0.664238	1.72702	136.652	70.611	15.3099	50.7313	0.0395094	0.0433861	0.0340424	Fusion_gene	B0285.1a.1	5 primer miss: exon 1 to 4	3 primer extra: exon 12 to 12	36cf9219-f087-441a-8565-d10452025b1c
B0285.1_NP3	B0285.1	22.7601	9.87703	4.29436	8.58872	136.652	70.611	15.3099	50.7313	0.139879	0.280495	0.169298	5'missing	B0285.1a.1	5 primer miss: exon 1 to 1	No extra exon.	38337221-5cac-4e7f-91ab-4051214d6df0
B0285.1_NP4	B0285.1	6.67362	3.7646	0.855592	2.05342	136.652	70.611	15.3099	50.7313	0.0533147	0.0558847	0.0404764	Intron_retention	B0285.1a.1	5 primer miss: exon 1 to 2;Intron retention: intron 6 to 6	No extra exon.	3b06a2da-25b8-480c-82d2-686102f2309e
B0285.1_NP5	B0285.1	5.18106	2.7898	0.664238	1.72702	136.652	70.611	15.3099	50.7313	0.0395094	0.0433861	0.0340424	3'missing	B0285.1a.1	5 primer miss: exon 1 to 2;3 primer miss: exon 13 to 15	No extra exon.	8bc2e31c-a54e-4cfa-a697-64ff8aa3e6fe
B0285.1_NP6	B0285.1	5.51274	3.032	0.689092	1.79164	136.652	70.611	15.3099	50.7313	0.0429396	0.0450095	0.0353162	5'missing	B0285.1a.1	5 primer miss: exon 1 to 1	No extra exon.	b17cb239-b96b-41ad-8940-f141367655ef
B0285.1_NP7	B0285.1	55.2648	27.6324	4.04376	23.5886	136.652	70.611	15.3099	50.7313	0.391333	0.264127	0.464971	5'missing	B0285.1a.1	5 primer miss: exon 1 to 2	No extra exon.	d2272878-de16-47fb-968a-0642ee3f67c3
B0285.1_NP8	B0285.1	6.5262	3.80695	0.815775	1.90348	136.652	70.611	15.3099	50.7313	0.0539145	0.053284	0.0375207	5'extra	B0285.1a.1	5 primer miss: exon 1 to 4	5 primer extra: exon 1 to 1	e24d462b-4e08-4cae-90a2-4ded595e9a34
B0285.3_NP1	B0285.3	6.81329	2.16787	0.929085	3.71634	202.924	92.1846	25.5216	85.2178	0.0235166	0.0364039	0.0436099	5'missing	B0285.3.1	5 primer miss: exon 1 to 1	No extra exon.	0ae995bb-8289-440b-b879-76899e1b4224
B0285.3_NP1	B0285.3	6.35368	3.63067	0.680751	2.04225	202.924	92.1846	25.5216	85.2178	0.0393848	0.0266736	0.0239651	3'missing	B0285.3.1	3 primer miss: exon 4 to 4	No extra exon.	1f7773cf-5031-4871-bcbc-229526b0988a
B0285.3_NP2	B0285.3	8.6091	4.30455	1.07614	3.22841	202.924	92.1846	25.5216	85.2178	0.0466949	0.0421658	0.0378843	3'missing	B0285.3.1	3 primer miss: exon 4 to 4	No extra exon.	494d3196-4b6f-4e41-99f8-b297a10d1cb6
B0285.3_NP3	B0285.3	15.9629	6.9582	1.63722	7.36751	202.924	92.1846	25.5216	85.2178	0.0754812	0.0641506	0.086455	3'missing	B0285.3.1	3 primer miss: exon 4 to 4	No extra exon.	98de56e7-83b5-4b22-8dc3-2055e631c96d
B0285.3_NP4	B0285.3	148.524	67.9866	18.827	61.7109	202.924	92.1846	25.5216	85.2178	0.737505	0.737692	0.724155	Missing_UTR	B0285.3.1	No miss exon.	No extra exon.	de417f77-62aa-4124-90fe-b4db7979f0c3
B0285.4_NP1	B0285.4	345.611	138.453	52.0498	155.108	448.432	183.394	68.3922	196.645	0.754945	0.761049	0.788773	3'extra	B0285.4.1	5 primer miss: exon 1 to 6;3 primer miss: exon 2 to 7	5 primer extra: exon 1 to 8;3 primer extra: exon 2 to 9	ab56b137-4fb7-4953-ab46-8dbe09feb166
B0285.5_NP1	B0285.5	97.9944	44.7534	11.5741	41.6669	201.623	105.534	21.6541	74.4354	0.424066	0.534502	0.559773	Extra_UTR	B0285.5.1	No miss exon.	No extra exon.	1c544613-c801-45ae-93a8-db38017ee5cc
B0285.5_NP1	B0285.5	27.3023	16.6847	3.79199	6.82558	201.623	105.534	21.6541	74.4354	0.158098	0.175116	0.091698	3'missing	B0285.5.1	3 primer miss: exon 9 to 9	No extra exon.	5fbd4f6b-6c45-405b-936f-48d4f40e3cff
B0285.5_NP2	B0285.5	5.36719	3.35449	0	2.0127	201.623	105.534	21.6541	74.4354	0.0317859	0	0.0270395	5'missing	B0285.5.1	5 primer miss: exon 1 to 3	No extra exon.	6c91416c-c076-4d47-a180-260e30697bc1
B0285.5_NP3	B0285.5	13.4823	8.16034	1.41919	3.90277	201.623	105.534	21.6541	74.4354	0.0773244	0.0655391	0.0524316	Intron_retention	B0285.5.1	Intron retention: intron 3 to 3	No extra exon.	71f1c825-87bf-4609-9999-864808a2b799
B0285.5_NP4	B0285.5	10.4972	6.99812	0.437382	3.06168	201.623	105.534	21.6541	74.4354	0.0663116	0.0201986	0.041132	5'missing	B0285.5.1	5 primer miss: exon 1 to 1	No extra exon.	aa45813a-9369-4465-a2e5-faea99ffbeb4
B0285.7_NP1	B0285.7	160.467	149.272	9.95144	1.24393	172.474	159.974	11.2555	1.24393	0.933097	0.884137	1	Extra_UTR	B0285.7.1	No miss exon.	No extra exon.	634afcc9-f2dd-4d5b-a9cb-8013ca319f6d
B0285.8_NP1	B0285.8	10.3816	3.99292	0.798584	5.59009	43.1295	12.3527	3.32193	27.4548	0.323242	0.240397	0.20361	5'missing	B0285.8.1	5 primer miss: exon 1 to 1	No extra exon.	065771ac-7fcc-4435-833b-906a9b09d8d2
B0285.8_NP1	B0285.8	20.332	4.0664	2.0332	14.2324	43.1295	12.3527	3.32193	27.4548	0.32919	0.612053	0.518394	Missing_UTR	B0285.8.1	No miss exon.	No extra exon.	3f2d7c9a-a556-4d0c-8fa0-49af509673a6
B0285.9_NP1	B0285.9	29.2015	11.3038	1.88397	16.0137	82.2567	40.4024	9.1264	32.7279	0.27978	0.20643	0.489298	Intron_retention	B0285.9.1	Intron retention: intron 6 to 6	No extra exon.	140498e6-d87d-4361-84f0-a9338659c0bf
B0285.9_NP1	B0285.9	42.2476	24.1415	7.24244	10.8637	82.2567	40.4024	9.1264	32.7279	0.597526	0.79357	0.331939	Intron_retention	B0285.9.1	5 primer miss: exon 1 to 1;Intron retention: intron 6 to 6	No extra exon.	39ff75f0-fe56-4a07-85ed-ed731bce5829
B0286.1_NP1	B0286.1	48.3148	28.2818	15.3193	4.71363	58.3757	35.4774	17.2127	5.68564	0.797178	0.890003	0.829042	Extra_UTR	B0286.1.3	No miss exon.	No extra exon.	681688c7-a79b-4eb9-bb1b-543b448857e7
B0286.2_NP1	B0286.2	17.5127	6.36826	6.36826	4.7762	27.5958	7.22553	11.9201	8.45019	0.881356	0.534247	0.565217	5'extra	B0286.2a.1	5 primer miss: exon 1 to 9	5 primer extra: exon 1 to 1	12b31193-664c-4c84-9e17-3deb2bfecade
B0286.3_NP1	B0286.3	17.8223	2.22779	11.1389	4.45557	142.357	8.87871	79.7193	53.7592	0.250913	0.139727	0.0828802	5'missing	B0286.3.1	5 primer miss: exon 1 to 1	No extra exon.	50ee7c59-4b02-450a-8068-f0d411910023
B0286.3_NP1	B0286.3	11.1002	0	8.0729	3.02734	142.357	8.87871	79.7193	53.7592	0	0.101267	0.0563129	Intron_retention	B0286.3.1	Intron retention: intron 4 to 4	No extra exon.	63acae16-4c4e-46bb-bbac-e3694c7e1bbc
B0286.3_NP2	B0286.3	6.01447	0	4.51085	1.50362	142.357	8.87871	79.7193	53.7592	0	0.0565842	0.0279695	Extra_UTR	B0286.3.1	No miss exon.	No extra exon.	80824cce-aa80-4a39-a4b1-ae78f907e575
B0286.3_NP3	B0286.3	12.0732	1.42037	7.10186	3.55093	142.357	8.87871	79.7193	53.7592	0.159975	0.0890858	0.0660526	3'missing	B0286.3.1	5 primer miss: exon 1 to 1;3 primer miss: exon 6 to 6	No extra exon.	91958e80-d487-4770-ad4e-6b13a2dda265
B0286.3_NP4	B0286.3	56.3414	1.94281	27.1993	27.1993	142.357	8.87871	79.7193	53.7592	0.218817	0.341188	0.505947	Extra_UTR	B0286.3.1	No miss exon.	No extra exon.	a6122857-b7a3-47c4-86ad-e40a666e69c6
B0286.3_NP5	B0286.3	17.7338	1.2667	7.60022	8.86692	142.357	8.87871	79.7193	53.7592	0.142667	0.0953372	0.164938	3'missing	B0286.3.1	3 primer miss: exon 4 to 6	No extra exon.	ccf062bc-b062-4e3a-b044-1d064ab73f25
B0286.3_NP6	B0286.3	10.3705	0	7.93041	2.44013	142.357	8.87871	79.7193	53.7592	0	0.0994792	0.04539	3'missing	B0286.3.1	3 primer miss: exon 6 to 6	No extra exon.	f7d8d041-e77f-42d9-bd80-eab408662ba5
B0286.4_NP1	B0286.4	23.6775	11.1686	4.0207	8.48815	506.527	315.263	108.991	82.2724	0.0354264	0.0368901	0.103171	Missing_UTR	B0286.4c.5	No miss exon.	No extra exon.	21a6ceec-65fd-4c16-b365-9ecfedca5609
B0286.4_NP1	B0286.4	5.31446	3.69701	1.38638	0.231063	506.527	315.263	108.991	82.2724	0.0117268	0.0127201	0.00280852	Missing_UTR	B0286.4d.1	No miss exon.	No extra exon.	33b5f621-5739-499f-92a2-8cd77f78aa36
B0286.4_NP2	B0286.4	109.494	71.4933	26.4074	11.5935	506.527	315.263	108.991	82.2724	0.226774	0.242289	0.140916	Intron_retention	B0286.4a.1	Intron retention: intron 2 to 2;Intron retention: intron 4 to 4	No extra exon.	432f6c9e-5ddf-4fb1-9df2-5f05a0e7c560
B0286.4_NP3	B0286.4	5.74464	4.17792	1.39264	0.17408	506.527	315.263	108.991	82.2724	0.0132522	0.0127775	0.0021159	Missing_exon	B0286.4a.1	Exon miss: exon 4 to 4	No extra exon.	67ab7fb2-5171-4890-bc09-5b6ce210692f
B0286.4_NP4	B0286.4	25.3117	15.5136	6.53204	3.26602	506.527	315.263	108.991	82.2724	0.0492085	0.0599318	0.0396977	Intron_retention	B0286.4a.1	5 primer miss: exon 1 to 1;Intron retention: intron 4 to 4	No extra exon.	86ad36ad-1532-4637-bc39-27708f752cbf
B0286.4_NP5	B0286.4	6.00251	3.36141	1.2005	1.4406	506.527	315.263	108.991	82.2724	0.0106622	0.0110147	0.0175102	5'missing	B0286.4c.3	5 primer miss: exon 1 to 2	No extra exon.	8f14dafc-1b50-4e56-98f3-d0ddf70ca825
B0286.4_NP6	B0286.4	13.904	10.0238	3.55683	0.323348	506.527	315.263	108.991	82.2724	0.031795	0.0326341	0.00393022	5'missing	B0286.4a.1	5 primer miss: exon 1 to 1	No extra exon.	91bdb08d-6f7c-4f6d-b25e-6db34f84d812
B0286.4_NP7	B0286.4	6.16266	4.22582	1.23253	0.704304	506.527	315.263	108.991	82.2724	0.0134041	0.0113085	0.00856064	Intron_retention	B0286.4a.1	5 primer miss: exon 1 to 1;Intron retention: intron 5 to 5	No extra exon.	d9868367-8227-44c9-941b-ce0cae30fae5
B0286.4_NP8	B0286.4	15.8919	9.60138	3.97299	2.31758	506.527	315.263	108.991	82.2724	0.0304552	0.0364523	0.0281695	Intron_retention	B0286.4a.1	Intron retention: intron 4 to 4	No extra exon.	dd64c4fc-cafe-4a3b-bb66-c4589280866c
B0286.4_NP9	B0286.4	8.72966	4.6766	1.87064	2.18242	506.527	315.263	108.991	82.2724	0.014834	0.0171632	0.0265267	5'missing	B0286.4c.3	5 primer miss: exon 1 to 3	No extra exon.	dfa5106d-9d7c-443e-a966-3ffcd65348a5
B0286.4_NP10	B0286.4	57.9335	38.0371	11.7037	8.19261	506.527	315.263	108.991	82.2724	0.120652	0.107382	0.0995792	Intron_retention	B0286.4a.1	5 primer miss: exon 1 to 1;Intron retention: intron 3 to 4	No extra exon.	ea696fa8-e227-4e01-8487-11311f02f628
B0286.4_NP11	B0286.4	12.7365	10.6138	2.12275	0	506.527	315.263	108.991	82.2724	0.0336664	0.0194764	0	Missing_UTR	B0286.4d.2	No miss exon.	No extra exon.	ed0d9d4c-1982-4d84-a415-8d2ba74a5813
B0286.4_NP12	B0286.4	21.2652	15.1894	3.47186	2.6039	506.527	315.263	108.991	82.2724	0.0481801	0.0318545	0.0316497	Missing_exon	B0286.4a.1	Exon miss: exon 4 to 4	No extra exon.	f02a98a3-e770-43ee-ab6b-16042567ee92
B0294.1_NP1	B0294.1	6.62729	0	6.62729	0	67.2268	0	65.9602	1.2666	NA	0.100474	0	Missing_UTR	B0294.1.1	No miss exon.	No extra exon.	d94973f2-c10c-4b87-989e-16c18c8e1e63
B0294.1_NP1	B0294.1	11.9342	0	11.9342	0	67.2268	0	65.9602	1.2666	NA	0.18093	0	Missing_UTR	B0294.1.1	No miss exon.	No extra exon.	f9654bbb-ec8a-4d12-8ab2-11b84eb8a766
B0302.1_NP1	B0302.1	5.51692	3.88227	0.612991	1.02165	78.2765	52.1141	12.1748	13.9876	0.0744956	0.0503493	0.0730395	Intron_retention	B0302.1a.1	Intron retention: intron 7 to 7;3 primer miss: exon 14 to 15	No extra exon.	52d3f2ad-df16-4c72-87a8-893d616eeb2c
B0302.1_NP1	B0302.1	13.2561	8.46919	1.10468	3.68226	78.2765	52.1141	12.1748	13.9876	0.162512	0.090735	0.263251	Intron_retention	B0302.1b.1	Intron retention: intron 7 to 7	No extra exon.	69677307-1b1e-4f6f-b1ab-290b43e1e880
B0302.1_NP2	B0302.1	11.0449	8.05981	1.19405	1.79107	78.2765	52.1141	12.1748	13.9876	0.154657	0.0980755	0.128046	Intron_retention	B0302.1a.1	Intron retention: intron 13 to 13	No extra exon.	7cced7bc-927c-4f18-9fe0-7c758964d1bb
B0302.1_NP3	B0302.1	5.91493	3.94329	0.876286	1.09536	78.2765	52.1141	12.1748	13.9876	0.0756664	0.0719757	0.0783089	5'missing	B0302.1a.1	5 primer miss: exon 1 to 8	No extra exon.	812a4acc-15e8-4003-a2b9-d6d535a56a1a
B0302.1_NP4	B0302.1	14.5828	10.3615	1.53504	2.68631	78.2765	52.1141	12.1748	13.9876	0.198823	0.126084	0.192049	5'missing	B0302.1a.1	5 primer miss: exon 1 to 5	No extra exon.	a07f08ac-17d5-4643-9f88-af679670c4e1
B0302.1_NP5	B0302.1	7.28588	5.40565	0.705085	1.17514	78.2765	52.1141	12.1748	13.9876	0.103727	0.0579137	0.0840128	5'missing	B0302.1c	5 primer miss: exon 1 to 2	No extra exon.	c5969ca9-cd81-40c7-8212-d222e9df9efe
B0302.1_NP6	B0302.1	11.6003	6.82371	3.41185	1.36474	78.2765	52.1141	12.1748	13.9876	0.130938	0.28024	0.0975676	Intron_retention	B0302.1a.1	Intron retention: intron 9 to 9	No extra exon.	eea283b1-3baa-4181-928d-82f2484d2144
B0302.5_NP1	B0302.5	98.0005	16.1539	32.3078	49.5387	141.627	29.1435	48.5327	63.9514	0.55429	0.665693	0.774631	Extra_UTR	B0302.5.1	No miss exon.	No extra exon.	134f9e3b-6714-44d3-878e-e11cea02423f
B0302.5_NP1	B0302.5	16.6946	4.17364	8.34729	4.17364	141.627	29.1435	48.5327	63.9514	0.14321	0.171993	0.0652628	Missing_UTR	B0302.5.1	No miss exon.	No extra exon.	1c0c7309-5292-4862-967e-bc5a5ec3b1c9
B0302.5_NP2	B0302.5	7.67287	2.30186	1.53457	3.83643	141.627	29.1435	48.5327	63.9514	0.0789838	0.0316194	0.0599899	3'missing	B0302.5.1	5 primer miss: exon 1 to 3;3 primer miss: exon 2 to 4	No extra exon.	4e22218b-506e-43bd-9d51-784ebb7d30cc
B0303.11_NP1	B0303.11	23.2545	0	5.05532	18.1992	57.049	3.69697	19.9278	33.4242	0	0.253681	0.544491	Intron_retention	B0303.11a.1	Intron retention: intron 9 to 9	No extra exon.	6c16bcea-5428-408c-991c-3cb3c1315bbc
B0303.11_NP1	B0303.11	15.6258	0.822412	6.57929	8.22412	57.049	3.69697	19.9278	33.4242	0.222455	0.330156	0.246053	Extra_UTR	B0303.11b.2	No miss exon.	No extra exon.	8fd8ed6b-3abf-4992-97f3-f2dd42d92d54
B0303.14_NP1	B0303.14	15.57	11.2104	1.8684	2.4912	43.2479	33.3031	3.07675	6.86815	0.336618	0.607265	0.362718	Missing_UTR	B0303.14.1	No miss exon.	No extra exon.	43d62798-6f53-4399-9bff-96f54c49dbdb
B0303.14_NP1	B0303.14	11.811	10.2362	0	1.5748	43.2479	33.3031	3.07675	6.86815	0.307365	0	0.22929	5'missing	B0303.14.1	5 primer miss: exon 1 to 1	No extra exon.	f5f2e194-335e-446f-8d80-d3bfed59e796
B0303.15_NP1	B0303.15	303.316	93.9539	48.8264	160.535	538.82	173.103	86.2216	279.496	0.542762	0.56629	0.574376	Extra_UTR	B0303.15.1	No miss exon.	No extra exon.	3e2a1477-f704-4af8-a944-db6e73f99ffd
B0303.15_NP1	B0303.15	24.7044	11.8581	3.45861	9.38767	538.82	173.103	86.2216	279.496	0.0685031	0.0401131	0.0335879	Extra_UTR	B0303.15.1	No miss exon.	No extra exon.	a5eb483a-c940-48de-a7d5-5f76dce08805
B0303.2_NP1	B0303.2	14.406	10.5644	1.9208	1.9208	22.908	16.0417	4.94554	1.9208	0.658557	0.38839	1	Extra_UTR	B0303.2.1	No miss exon.	No extra exon.	edb8e2ff-ff4c-433e-a74e-58fcdd59ab6d
B0303.3_NP1	B0303.3	10.5093	4.96273	2.18944	3.35714	438.639	232.339	65.6739	140.548	0.0213598	0.033338	0.0238862	New_junction	NA	NA	NA	2bb1d153-215e-4964-9714-bcca2ea464b3
B0303.3_NP1	B0303.3	5.24402	2.84051	0.655502	1.74801	438.639	232.339	65.6739	140.548	0.0122257	0.00998117	0.0124371	Missing_UTR	B0303.3.1	No miss exon.	No extra exon.	5d81c868-f74c-4579-ac9a-68b7d8ed9b22
B0303.3_NP2	B0303.3	13.3324	7.5715	1.48138	4.27954	438.639	232.339	65.6739	140.548	0.0325881	0.0225566	0.0304491	3'extra	B0303.3.2	No miss exon.	3 primer extra: exon 5 to 5	a85ec84a-550e-4410-a04b-541d4a72b307
B0303.3_NP3	B0303.3	26.4133	14.5056	4.11354	7.79408	438.639	232.339	65.6739	140.548	0.062433	0.0626358	0.0554551	3'extra	B0303.3.2	No miss exon.	3 primer extra: exon 5 to 5	bccb73ac-35f7-440c-a0e2-fb3855e0b838
B0303.3_NP4	B0303.3	17.54	8.1345	2.03363	7.37189	438.639	232.339	65.6739	140.548	0.0350113	0.0309655	0.0524513	Missing_UTR	B0303.3.1	No miss exon.	No extra exon.	ca431bdc-bfee-471a-97e9-96afa412dc8f
B0303.3_NP5	B0303.3	77.2709	44.7358	9.76053	22.7746	438.639	232.339	65.6739	140.548	0.192545	0.148621	0.162042	Extra_UTR	B0303.3.2	No miss exon.	No extra exon.	d55f5162-17b6-4d11-92ce-d9ad158b260f
B0303.3_NP6	B0303.3	5.85684	3.4257	0.663038	1.7681	438.639	232.339	65.6739	140.548	0.0147444	0.0100959	0.0125801	Missing_UTR	B0303.3.1	No miss exon.	No extra exon.	d68bbd12-f4b5-411f-8678-ee1513f76dbc
B0303.3_NP7	B0303.3	204.481	103.864	31.6459	68.9719	438.639	232.339	65.6739	140.548	0.447034	0.481864	0.490737	5'missing	B0303.3.2	5 primer miss: exon 1 to 1	No extra exon.	fe3d0cde-dd13-4974-a915-3dfcc5f9d9a3
B0303.4_NP1	B0303.4	5.03251	2.85629	0.816082	1.36014	259.29	117.47	31.8426	109.977	0.024315	0.0256286	0.0123674	5'missing	B0303.4.1	5 primer miss: exon 1 to 6	No extra exon.	0d67bf70-3980-4c83-8c05-f413ef05cfb9
B0303.4_NP1	B0303.4	5.43454	2.29923	1.0451	2.09021	259.29	117.47	31.8426	109.977	0.0195729	0.032821	0.0190058	New_junction	NA	NA	NA	35e58717-4318-4bf0-95d9-cf3133369cab
B0303.4_NP2	B0303.4	6.21866	3.3797	0.811129	2.02782	259.29	117.47	31.8426	109.977	0.0287707	0.0254731	0.0184386	5'missing	B0303.4.1	5 primer miss: exon 1 to 2	No extra exon.	38eb20f4-2170-40a6-993f-f694b3ba51cf
B0303.4_NP3	B0303.4	16.8324	8.71679	2.10405	6.01158	259.29	117.47	31.8426	109.977	0.0742043	0.0660767	0.054662	Intron_retention	B0303.4.1	Intron retention: intron 3 to 3	No extra exon.	8ae5d70f-82b1-4198-8da4-05de9ec70e34
B0303.4_NP4	B0303.4	16.2336	7.66586	2.7056	5.86213	259.29	117.47	31.8426	109.977	0.0652579	0.0849679	0.0533031	New_junction	NA	NA	NA	aba5dcc0-c882-4302-a1bc-51640b369d4e
B0303.4_NP5	B0303.4	102.461	39.351	11.1371	51.9731	259.29	117.47	31.8426	109.977	0.334987	0.349754	0.47258	Intron_retention	B0303.4.1	Intron retention: intron 5 to 5	No extra exon.	b14c718c-5ca4-41db-8858-aca54b96c5f7
B0303.4_NP6	B0303.4	21.7892	11.4889	2.77317	7.52718	259.29	117.47	31.8426	109.977	0.0978022	0.08709	0.0684431	5'missing	B0303.4.1	5 primer miss: exon 1 to 6	No extra exon.	ba1a6429-d7e7-4570-94b7-b2d7a3f3bd96
B0303.4_NP7	B0303.4	12.8523	6.92045	1.48295	4.44886	259.29	117.47	31.8426	109.977	0.0589124	0.0465714	0.0404526	5'missing	B0303.4.1	5 primer miss: exon 1 to 2	No extra exon.	c7d7bf49-d9e2-49bd-bcb9-498255be7936
B0303.4_NP8	B0303.4	9.56681	4.94835	1.31956	3.2989	259.29	117.47	31.8426	109.977	0.0421243	0.0414401	0.0299962	3'missing	B0303.4.1	3 primer miss: exon 9 to 10	No extra exon.	d5cfede8-ad32-43df-ba73-5f949a6d19eb
B0303.4_NP9	B0303.4	9.72341	5.21744	1.89725	2.60872	259.29	117.47	31.8426	109.977	0.044415	0.0595822	0.0237205	New_junction	NA	NA	NA	f671ac1d-65f4-46f8-bf01-d858932abe05
B0303.8_NP1	B0303.8	6.45671	6.45671	0	0	11.056	11.056	0	0	0.584	NA	NA	Extra_UTR	B0303.8.1	No miss exon.	No extra exon.	27d9df8b-9789-454a-84df-930f85855e0d
B0303.9_NP1	B0303.9	13.4753	4.49178	3.14425	5.83932	149.026	32.5253	32.6602	83.8403	0.138101	0.0962714	0.0696481	5'missing	B0303.9.1	5 primer miss: exon 1 to 1	No extra exon.	1d3d5b20-7bd8-40bc-b5ef-f453cfe4c940
B0303.9_NP1	B0303.9	72.6471	14.1062	15.5169	43.024	149.026	32.5253	32.6602	83.8403	0.4337	0.475099	0.513166	Extra_UTR	B0303.9.1	No miss exon.	No extra exon.	4c40ca3e-cf40-4de6-807c-3f5f015c6bb3
B0303.9_NP2	B0303.9	6.34791	0.577082	1.15416	4.61666	149.026	32.5253	32.6602	83.8403	0.0177425	0.0353385	0.0550649	3'missing	B0303.9.1	3 primer miss: exon 8 to 8	No extra exon.	f677d9fa-0115-4566-b386-5268aa9577f8
B0304.1_NP1	B0304.1	5.15526	3.43684	1.71842	0	127.365	102.015	23.028	2.32269	0.0336897	0.074623	0	Intron_retention	B0304.1b.2	Intron retention: intron 2 to 2	No extra exon.	4a4f309f-be2a-4e63-a3d8-33971f04f90a
B0304.1_NP1	B0304.1	61.762	51.5987	8.59978	1.5636	127.365	102.015	23.028	2.32269	0.505797	0.373449	0.673182	Extra_UTR	B0304.1c.2	No miss exon.	No extra exon.	9961a9c6-c1ca-478d-9a2b-2b42f12fb25b
B0304.2_NP1	B0304.2	29.3553	12.147	2.0245	15.1838	166.999	70.238	16.6618	80.0996	0.172941	0.121505	0.189561	5'missing	B0304.2.1	5 primer miss: exon 1 to 1	No extra exon.	1f9d769f-26be-4b00-a7ad-d231aff40cf0
B0304.2_NP1	B0304.2	8.40257	5.60171	0	2.80086	166.999	70.238	16.6618	80.0996	0.0797533	0	0.0349672	5'missing	B0304.2.1	5 primer miss: exon 1 to 2	No extra exon.	1fe6d383-e8c1-4451-9437-35b48554c6bd
B0304.2_NP2	B0304.2	75.4588	30.5046	7.22478	37.7294	166.999	70.238	16.6618	80.0996	0.434304	0.433612	0.471031	Extra_UTR	B0304.2.1	No miss exon.	No extra exon.	7b3ba9df-4b3a-4a31-bdf9-b982b8f1bc39
B0304.2_NP3	B0304.2	6.15978	1.84793	0.615978	3.69587	166.999	70.238	16.6618	80.0996	0.0263096	0.0369693	0.0461409	Extra_UTR	B0304.2.1	No miss exon.	No extra exon.	7ca1885f-9e25-416c-9562-d7629b76e085
B0304.3_NP1	B0304.3	15.2573	11.7364	3.52091	0	17.2474	13.7265	3.52091	0	0.855019	1	NA	Extra_UTR	B0304.3.1	No miss exon.	No extra exon.	bee083a7-e0fa-476f-b48b-408ab0494187
B0304.4_NP1	B0304.4	8.95537	2.98512	2.98512	2.98512	82.5884	22.6458	14.3118	45.6308	0.131818	0.208578	0.065419	Intron_retention	B0304.4.1	Intron retention: intron 2 to 2	No extra exon.	8ccdb5a3-fd9b-4c37-89f3-3f3f601a6c5f
B0310.1_NP1	B0310.1	19.4586	10.9454	6.0808	2.43232	35.8215	19.5894	10.2029	6.02921	0.558743	0.595991	0.403423	Extra_UTR	B0310.1a.1	No miss exon.	No extra exon.	3db23edf-090f-4e1b-8d0f-b2f8ace3c36a
B0310.1_NP1	B0310.1	5.74912	2.29965	1.14982	2.29965	35.8215	19.5894	10.2029	6.02921	0.117393	0.112696	0.381418	Missing_UTR	B0310.1b.1	No miss exon.	No extra exon.	fdd6bb0d-92d7-45c4-a845-ec47adcf02b0
B0310.2_NP1	B0310.2	10.3926	9.35338	1.03926	0	14.5939	12.8029	1.79107	0	0.73057	0.580247	NA	Missing_UTR	B0310.2b.1	No miss exon.	No extra exon.	ebd8f99a-1699-4493-8ff7-ba779f04f0c2
B0310.5_NP1	B0310.5	54.2143	10.6193	8.38366	35.2114	208.868	48.4825	26.2156	133.981	0.219034	0.319796	0.262809	Missing_UTR	B0310.5a.1	No miss exon.	No extra exon.	016063d7-91b0-4eb0-a68a-7a1b70c99c72
B0310.5_NP1	B0310.5	48.4652	10.3392	3.87722	34.2487	208.868	48.4825	26.2156	133.981	0.213257	0.147897	0.255624	Missing_UTR	B0310.5a.1	No miss exon.	No extra exon.	048fe170-be2d-4cf4-b9df-af0d800206b0
B0310.5_NP2	B0310.5	12.5171	3.57631	2.14579	6.79499	208.868	48.4825	26.2156	133.981	0.073765	0.0818514	0.0507161	Intron_retention	B0310.5a.1	Intron retention: intron 6 to 6	No extra exon.	54dd4f41-6c06-4c24-87d2-8cee5a980ba2
B0310.5_NP3	B0310.5	11.3877	2.62793	1.75195	7.00781	208.868	48.4825	26.2156	133.981	0.0542037	0.0668285	0.0523046	Intron_retention	B0310.5a.1	Intron retention: intron 6 to 6	No extra exon.	86e2af21-334a-4292-8826-3e01a826e178
B0310.5_NP4	B0310.5	42.9432	8.08343	4.54693	30.3129	208.868	48.4825	26.2156	133.981	0.166729	0.173443	0.226248	Intron_retention	B0310.5a.1	Intron retention: intron 2 to 2	No extra exon.	f0bb3329-26ff-4b2c-8d5d-3771032652cb
B0334.1_NP1	B0334.1	17.1842	0.613721	12.2744	4.29605	526.661	19.1026	235.476	272.082	0.0321276	0.052126	0.0157895	Missing_UTR	B0334.1.1	No miss exon.	No extra exon.	1f330395-52a4-4501-84f3-4edf704472a0
B0334.1_NP1	B0334.1	8.67107	0.481726	5.05812	3.13122	526.661	19.1026	235.476	272.082	0.0252178	0.0214804	0.0115084	5'missing	B0334.1.1	5 primer miss: exon 1 to 1	No extra exon.	22321fc2-69f2-4244-a018-7f799c181dd7
B0334.1_NP2	B0334.1	13.9748	1.2152	9.7216	3.038	526.661	19.1026	235.476	272.082	0.0636143	0.0412848	0.0111657	3'missing	B0334.1.1	3 primer miss: exon 3 to 3	No extra exon.	372bac46-ce62-43ef-a3a2-cce667627bd8
B0334.1_NP3	B0334.1	38.3012	0.957529	22.5019	14.8417	526.661	19.1026	235.476	272.082	0.0501255	0.0955593	0.0545486	3'missing	B0334.1.1	3 primer miss: exon 3 to 3	No extra exon.	75d51ce4-7dcc-4c31-964e-c7946a6b3202
B0334.1_NP4	B0334.1	6.59254	0.470896	3.29627	2.82537	526.661	19.1026	235.476	272.082	0.0246508	0.0139983	0.0103843	5'missing	B0334.1.1	5 primer miss: exon 1 to 1	No extra exon.	8883f1e6-f5eb-4087-8230-a04daf834d6f
B0334.1_NP5	B0334.1	15.9901	0.615006	11.9926	3.38253	526.661	19.1026	235.476	272.082	0.0321948	0.0509292	0.012432	Extra_UTR	B0334.1.1	No miss exon.	No extra exon.	d418dcfd-1654-41b3-83da-066ce06ce984
B0334.11_NP1	B0334.11	21.874	7.9542	8.61705	5.3028	278.611	64.5418	65.6938	148.376	0.123241	0.13117	0.035739	3'missing	B0334.11a.1	3 primer miss: exon 8 to 8	No extra exon.	11e55ac4-ffce-4eec-990c-834fa21e81ce
B0334.11_NP1	B0334.11	9.41551	3.38958	2.63634	3.38958	278.611	64.5418	65.6938	148.376	0.0525176	0.0401307	0.0228446	3'missing	B0334.11a.1	3 primer miss: exon 7 to 8	No extra exon.	29a8dcae-87df-4b11-8db9-ca517a89d1d6
B0334.11_NP2	B0334.11	8.5405	3.16315	1.58157	3.79578	278.611	64.5418	65.6938	148.376	0.0490093	0.0240749	0.0255822	Intron_retention	B0334.11a.1	Intron retention: intron 4 to 4	No extra exon.	38b67f30-dfd1-4862-a380-221f5dd0961a
B0334.11_NP3	B0334.11	5.66594	1.97076	1.23173	2.46345	278.611	64.5418	65.6938	148.376	0.0305347	0.0187495	0.0166028	Intron_retention	B0334.11a.1	Intron retention: intron 5 to 5	No extra exon.	48b09173-1e68-4570-9e37-942c03741395
B0334.11_NP4	B0334.11	120.351	23.3826	23.3826	73.5863	278.611	64.5418	65.6938	148.376	0.362286	0.355933	0.495946	Extra_UTR	B0334.11a.1	No miss exon.	No extra exon.	592b287e-290c-4f8d-b099-f1461865bfef
B0334.11_NP5	B0334.11	5.85547	1.95182	1.21989	2.68376	278.611	64.5418	65.6938	148.376	0.0302412	0.0185693	0.0180876	Intron_retention	B0334.11a.1	Intron retention: intron 6 to 6	No extra exon.	8b47c7c8-ead6-4a63-9935-1acb42679618
B0334.11_NP6	B0334.11	5.68805	1.62516	1.62516	2.43774	278.611	64.5418	65.6938	148.376	0.0251799	0.0247384	0.0164295	5'missing	B0334.11a.1	5 primer miss: exon 1 to 1	No extra exon.	cc86a1d0-ee11-41e0-aec3-bdfb90076e8a
B0334.13_NP1	B0334.13	29.1879	21.8909	6.0808	1.21616	29.1879	21.8909	6.0808	1.21616	1	1	1	Missing_UTR	B0334.13.1	No miss exon.	No extra exon.	4a9cd7dd-9c3d-4ae9-bf86-1d59720ac6a7
B0334.15_NP1	B0334.15	5.7307	4.68875	0	1.04195	304.107	159.183	30.0826	114.841	0.0294551	0	0.00907294	Missing_UTR	B0334.5.1	No miss exon.	No extra exon.	164f97b8-0f14-41b2-a03f-5300943f9561
B0334.15_NP1	B0334.15	130.376	61.4982	23.3693	45.5087	304.107	159.183	30.0826	114.841	0.386336	0.776837	0.396275	3'extra	B0334.15.1	No miss exon.	3 primer extra: exon 4 to 6	44244605-94dd-42aa-ae89-0e911da1fca0
B0334.15_NP2	B0334.15	6.94686	2.31562	1.54375	3.08749	304.107	159.183	30.0826	114.841	0.0145469	0.0513169	0.0268849	Fusion_gene	B0334.15.1	5 primer miss: exon 1 to 1	3 primer extra: exon 3 to 4	ad37d5ed-4fde-4eb3-8c66-86fa6671e80f
B0334.15_NP3	B0334.15	152.433	85.8235	3.84285	62.7665	304.107	159.183	30.0826	114.841	0.53915	0.127743	0.546551	Extra_UTR	B0334.15.1	No miss exon.	No extra exon.	bf73bf04-e734-4ef8-ae60-9c94e81c9e58
B0334.2_NP1	B0334.2	27.8611	0	10.8726	16.9885	107.464	0	51.7709	55.6935	NA	0.210015	0.305035	New_junction	NA	NA	NA	5b65d799-bf5b-472f-9d92-3bb5b063f1eb
B0334.2_NP1	B0334.2	40.6861	0	16.1209	24.5652	107.464	0	51.7709	55.6935	NA	0.31139	0.441078	Extra_UTR	B0334.2b.2	No miss exon.	No extra exon.	8ae1fe3f-1232-4840-847a-71dc78f6fb90
B0334.2_NP2	B0334.2	17.1368	0	10.4045	6.73232	107.464	0	51.7709	55.6935	NA	0.200972	0.120882	5'missing	B0334.2b.2	5 primer miss: exon 1 to 1	No extra exon.	9a7a56cf-56ce-4123-9600-8fa7d029e279
B0334.3_NP1	B0334.3	53.1015	19.6672	17.7005	15.7338	270.254	98.0341	85.9275	86.2919	0.200616	0.205994	0.182332	Extra_UTR	B0334.3a.2	No miss exon.	No extra exon.	03c66f63-c9e6-4681-99f0-bc3cc368116d
B0334.3_NP1	B0334.3	8.24832	2.92128	2.74944	2.5776	270.254	98.0341	85.9275	86.2919	0.0297986	0.0319972	0.0298707	3'missing	B0334.3b.1	3 primer miss: exon 4 to 4	No extra exon.	1871b622-0c36-4d4a-b91e-6457a917add9
B0334.3_NP2	B0334.3	8.45482	3.53923	2.55611	2.35949	270.254	98.0341	85.9275	86.2919	0.036102	0.0297473	0.0273431	5'missing	B0334.3b.1	5 primer miss: exon 1 to 2	No extra exon.	2b713935-b84d-4160-b273-1c975e84cc77
B0334.3_NP3	B0334.3	11.6636	4.29712	3.88787	3.47862	270.254	98.0341	85.9275	86.2919	0.0438329	0.045246	0.0403123	3'missing	B0334.3b.1	3 primer miss: exon 4 to 4	No extra exon.	46882ad3-4e5d-4c29-b2b0-f1e28aaa06a4
B0334.3_NP4	B0334.3	16.086	5.89821	4.28961	5.89821	270.254	98.0341	85.9275	86.2919	0.0601648	0.0499212	0.0683518	5'missing	B0334.3b.1	5 primer miss: exon 1 to 1	No extra exon.	64199a9d-5b8f-41c1-b245-bb429ff147bf
B0334.3_NP5	B0334.3	15.5683	6.83484	4.55656	4.17685	270.254	98.0341	85.9275	86.2919	0.069719	0.053028	0.0484037	3'missing	B0334.3a.2	3 primer miss: exon 5 to 5	No extra exon.	86ea688a-7a42-4cde-bc37-7a052ea82f1f
B0334.3_NP6	B0334.3	8.49241	3.39696	2.18376	2.91168	270.254	98.0341	85.9275	86.2919	0.0346508	0.025414	0.0337423	Missing_UTR	B0334.3b.1	No miss exon.	No extra exon.	91ee0210-c07a-4d60-87f8-deea087f7fa9
B0334.3_NP7	B0334.3	5.17561	1.94085	1.2939	1.94085	270.254	98.0341	85.9275	86.2919	0.0197977	0.0150581	0.0224917	3'missing	B0334.3a.2	3 primer miss: exon 5 to 5	No extra exon.	d02b85f1-79c3-48d9-a7da-14afea05f46f
B0334.4_NP1	B0334.4	108.689	64.8144	15.9543	27.92	625.989	333.818	88.5422	203.629	0.194161	0.180189	0.137113	5'missing	B0334.4.1	5 primer miss: exon 1 to 1	No extra exon.	04c7e13f-1e90-4b65-b002-37fadfa48b34
B0334.4_NP1	B0334.4	19.1601	10.6445	5.32224	3.19334	625.989	333.818	88.5422	203.629	0.0318871	0.0601096	0.0156822	Missing_UTR	B0334.4.1	No miss exon.	No extra exon.	1157bcc6-c9ec-485f-9443-04b7428f80a3
B0334.4_NP2	B0334.4	8.95087	5.96725	1.49181	1.49181	625.989	333.818	88.5422	203.629	0.0178758	0.0168486	0.00732614	3'missing	B0334.4.1	5 primer miss: exon 1 to 1;3 primer miss: exon 4 to 4	No extra exon.	344c1af2-515d-442e-90c0-e2d90343e490
B0334.4_NP3	B0334.4	8.74239	5.82826	1.3246	1.58952	625.989	333.818	88.5422	203.629	0.0174594	0.0149601	0.007806	5'missing	B0334.4.1	5 primer miss: exon 1 to 1	No extra exon.	51362191-9e0c-4873-85f0-f08b224fcc66
B0334.4_NP4	B0334.4	8.05533	4.02767	1.43845	2.58921	625.989	333.818	88.5422	203.629	0.0120655	0.016246	0.0127154	3'missing	B0334.4.1	5 primer miss: exon 1 to 3;3 primer miss: exon 2 to 4	No extra exon.	5526a2de-e8d6-46cd-b6d4-f1808001c986
B0334.4_NP5	B0334.4	7.32588	5.32791	1.33198	0.665989	625.989	333.818	88.5422	203.629	0.0159605	0.0150434	0.00327061	3'missing	B0334.4.1	3 primer miss: exon 4 to 4	No extra exon.	67d01f81-77bd-41d6-b765-2a1fc09bb91b
B0334.4_NP6	B0334.4	283.573	143.103	33.3615	107.108	625.989	333.818	88.5422	203.629	0.428686	0.376786	0.525996	3'missing	B0334.4.1	3 primer miss: exon 4 to 4	No extra exon.	b4a05856-7612-41ae-8886-9769fb43e563
B0334.4_NP7	B0334.4	31.9363	13.3068	5.32272	13.3068	625.989	333.818	88.5422	203.629	0.0398624	0.060115	0.0653484	5'missing	B0334.4.1	5 primer miss: exon 1 to 2	No extra exon.	cabd55a5-1bb9-49f7-a788-e6e2ba1f25f3
B0334.5_NP1	B0334.5	14.1959	9.71299	1.24526	3.23766	104.988	71.3341	12.3162	21.3376	0.136162	0.101107	0.151735	Fusion_gene	B0334.15.1	5 primer miss: exon 1 to 2;3 primer miss: exon 2 to 3	5 primer extra: exon 1 to 3;3 primer extra: exon 2 to 4	2d58bc74-1c4d-4aeb-aa49-206a16434104
B0334.5_NP1	B0334.5	11.9405	8.33581	0.901169	2.70351	104.988	71.3341	12.3162	21.3376	0.116856	0.0731694	0.126702	3'extra	B0334.5.1	5 primer miss: exon 1 to 1;3 primer miss: exon 4 to 4	3 primer extra: exon 3 to 3	42fcfb15-96f3-423e-88ec-df7680091c98
B0334.5_NP2	B0334.5	36.3079	24.6535	4.48246	7.17194	104.988	71.3341	12.3162	21.3376	0.345607	0.363948	0.336118	Extra_UTR	B0334.5.1	No miss exon.	No extra exon.	578ad74b-2003-45f1-ae52-d5f4dab3c5f4
B0334.5_NP3	B0334.5	14.1959	9.71299	1.24526	3.23766	104.988	71.3341	12.3162	21.3376	0.136162	0.101107	0.151735	Fusion_gene	B0334.15.1	5 primer miss: exon 1 to 1	3 primer extra: exon 3 to 5	8c96a77b-1315-44e5-a77f-95e7a8504827
B0334.5_NP4	B0334.5	12.2058	8.58929	0.904136	2.71241	104.988	71.3341	12.3162	21.3376	0.120409	0.0734103	0.127119	5'missing	B0334.5.1	5 primer miss: exon 1 to 2	No extra exon.	911df887-cdc1-4b5a-aec0-840b0d68d2a8
B0334.8_NP1	B0334.8	90.6593	39.3221	15.2919	36.0453	114.098	46.5085	20.7646	46.8249	0.845482	0.73644	0.769789	5'extra	B0334.8a.1	5 primer miss: exon 1 to 1	5 primer extra: exon 1 to 1	17d6fe6c-764d-4c7d-afb6-aa2bf0909cbe
B0334.8_NP1	B0334.8	22.9965	7.18641	5.03048	10.7796	114.098	46.5085	20.7646	46.8249	0.154518	0.242262	0.230211	Intron_retention	B0334.8a.1	5 primer miss: exon 1 to 4;Intron retention: intron 6 to 6;3 primer miss: exon 9 to 9	No extra exon.	1b84f1ed-c1d2-48d8-bdd6-5a46f4456426
B0336.1_NP1	B0336.1	10.9914	6.08033	2.10473	2.80631	177.27	83.467	24.6289	69.1744	0.0728471	0.0854576	0.0405686	5'missing	B0336.1a.1	5 primer miss: exon 1 to 1	No extra exon.	3ef0389f-9e9a-407a-8141-2861d23fdbaa
B0336.1_NP1	B0336.1	70.0305	33.1152	8.14308	28.7722	177.27	83.467	24.6289	69.1744	0.396746	0.33063	0.415937	Missing_UTR	B0336.1a.1	No miss exon.	No extra exon.	6bbd7270-d567-4c76-ad0a-734a1d8d0179
B0336.1_NP2	B0336.1	10.7703	5.38513	2.10722	3.2779	177.27	83.467	24.6289	69.1744	0.064518	0.0855588	0.0473861	5'missing	B0336.1a.1	5 primer miss: exon 1 to 2	No extra exon.	8a4c3603-d9b8-4848-b78d-d151f9c324ec
B0336.1_NP3	B0336.1	5.81716	2.43945	1.5012	1.8765	177.27	83.467	24.6289	69.1744	0.0292266	0.0609528	0.0271272	Intron_retention	B0336.1a.1	5 primer miss: exon 1 to 4;Intron retention: intron 6 to 6	No extra exon.	b14facb8-dd73-4701-bf9d-6e0db56c2aea
B0336.1_NP4	B0336.1	7.67457	3.83729	1.6157	2.22159	177.27	83.467	24.6289	69.1744	0.0459737	0.0656016	0.0321157	5'missing	B0336.1a.1	5 primer miss: exon 1 to 4	No extra exon.	e90211e4-346c-44f3-b224-c6866f5cba06
B0336.1_NP5	B0336.1	62.0701	29.2688	7.56953	25.2318	177.27	83.467	24.6289	69.1744	0.350664	0.307343	0.364756	Missing_UTR	B0336.1a.1	No miss exon.	No extra exon.	f9202875-3958-446f-969c-f4e70a7cd3e3
B0336.10_NP1	B0336.10	246.897	50.3987	182.341	14.1569	21501.1	2821.94	8896.7	9782.41	0.0178596	0.0204954	0.00144718	Missing_UTR	B0336.10.3	No miss exon.	No extra exon.	025f0bd6-6f4a-48dc-b714-38eee4eb6b2f
B0336.10_NP1	B0336.10	16.5814	1.93971	9.76113	4.88057	21501.1	2821.94	8896.7	9782.41	0.000687368	0.00109716	0.000498912	3'extra	B0336.10.3	No miss exon.	3 primer extra: exon 3 to 3	07200d41-db4f-415e-9629-eba16adddbe0
B0336.10_NP2	B0336.10	5.93408	0.944058	0.809192	4.18083	21501.1	2821.94	8896.7	9782.41	0.000334542	9.09542e-05	0.000427382	New_junction	NA	NA	NA	0cd17a21-607e-4e07-a9fe-2bdc8e96d306
B0336.10_NP3	B0336.10	60.1214	10.7463	21.7831	27.5919	21501.1	2821.94	8896.7	9782.41	0.00380813	0.00244845	0.00282057	3'extra	B0336.10.3	No miss exon.	3 primer extra: exon 3 to 3	0d9e0b68-52a0-4601-9410-88c274ba6e4c
B0336.10_NP4	B0336.10	41.1136	5.74568	20.8121	14.5557	21501.1	2821.94	8896.7	9782.41	0.00203607	0.00233931	0.00148795	3'missing	B0336.10.3	5 primer miss: exon 1 to 1;3 primer miss: exon 2 to 2	No extra exon.	1211099b-5926-48af-97db-0e34b9353292
B0336.10_NP5	B0336.10	12.514	1.9759	4.17134	6.36678	21501.1	2821.94	8896.7	9782.41	0.00070019	0.000468863	0.000650839	New_junction	NA	NA	NA	2b7208c8-45ff-4f71-8b4a-af8780d48101
B0336.10_NP6	B0336.10	8.05402	1.95249	2.52196	3.57956	21501.1	2821.94	8896.7	9782.41	0.000691895	0.000283472	0.000365918	Missing_UTR	B0336.10.3	No miss exon.	No extra exon.	2c808d4c-73f4-4a96-91f0-9e8095a76e06
B0336.10_NP7	B0336.10	64.2172	8.73354	38.5303	16.9533	21501.1	2821.94	8896.7	9782.41	0.00309487	0.00433085	0.00173304	Missing_UTR	B0336.10.3	No miss exon.	No extra exon.	2f625c35-8c7a-47a7-8a0a-a56949387e3b
B0336.10_NP8	B0336.10	6.905	1.04226	1.95425	3.90849	21501.1	2821.94	8896.7	9782.41	0.000369343	0.00021966	0.000399543	Missing_UTR	B0336.10.3	No miss exon.	No extra exon.	3513b8c8-4435-4381-9603-83126ff1d116
B0336.10_NP9	B0336.10	17.4862	2.07691	10.3845	5.02478	21501.1	2821.94	8896.7	9782.41	0.000735986	0.00116724	0.000513655	3'extra	B0336.10.3	No miss exon.	3 primer extra: exon 3 to 3	3b5dbc9a-1604-403c-b4db-785d18557ec4
B0336.10_NP10	B0336.10	26.6766	2.82459	11.6122	12.2399	21501.1	2821.94	8896.7	9782.41	0.00100094	0.00130522	0.00125121	5'extra	B0336.10.3	No miss exon.	5 primer extra: exon 1 to 1	3dcb8f63-96ae-4eba-aadc-d5a8627f1390
B0336.10_NP11	B0336.10	12.9174	2.50636	4.62713	5.78392	21501.1	2821.94	8896.7	9782.41	0.00088817	0.000520095	0.000591257	Missing_UTR	B0336.10.3	No miss exon.	No extra exon.	3ec99fd0-84a7-4aca-96f9-0d691d5ab274
B0336.10_NP12	B0336.10	106.107	23.0938	66.7849	16.2281	21501.1	2821.94	8896.7	9782.41	0.00818366	0.0075067	0.00165891	Missing_UTR	B0336.10.3	No miss exon.	No extra exon.	438d0da6-3338-4ebd-a1a6-95014c705da8
B0336.10_NP13	B0336.10	6.00937	0.982301	2.13795	2.88912	21501.1	2821.94	8896.7	9782.41	0.000348094	0.000240308	0.000295338	Missing_UTR	B0336.10.3	No miss exon.	No extra exon.	44a2d296-2967-4764-8a4f-59c2b57b6774
B0336.10_NP14	B0336.10	556.054	108.784	207.459	239.811	21501.1	2821.94	8896.7	9782.41	0.0385495	0.0233186	0.0245145	Extra_UTR	B0336.10.3	No miss exon.	No extra exon.	4679065b-2bce-4a3c-be7e-5e9e1e4ec4a3
B0336.10_NP15	B0336.10	241.158	34.616	154.041	52.5009	21501.1	2821.94	8896.7	9782.41	0.0122667	0.0173144	0.00536687	Missing_UTR	B0336.10.3	No miss exon.	No extra exon.	48c3114d-c6b4-4a4f-8e27-b9e743583671
B0336.10_NP16	B0336.10	16.1595	1.92671	9.63356	4.59925	21501.1	2821.94	8896.7	9782.41	0.000682761	0.00108282	0.000470155	3'extra	B0336.10.3	No miss exon.	3 primer extra: exon 3 to 3	50cf49d2-bdb9-4358-9842-a4e6ee22c856
B0336.10_NP17	B0336.10	172.844	43.5071	56.5296	72.8077	21501.1	2821.94	8896.7	9782.41	0.0154174	0.00635399	0.00744272	Extra_UTR	B0336.10.3	No miss exon.	No extra exon.	52841bbc-17c6-4466-a90a-c584c723c101
B0336.10_NP18	B0336.10	47.5363	8.21771	17.8261	21.4925	21501.1	2821.94	8896.7	9782.41	0.00291208	0.00200367	0.00219705	3'extra	B0336.10.3	No miss exon.	3 primer extra: exon 3 to 3	553df102-6944-4f4d-a9a6-57fee1bbcb7a
B0336.10_NP19	B0336.10	41.2168	4.72036	21.0689	15.4275	21501.1	2821.94	8896.7	9782.41	0.00167273	0.00236817	0.00157707	3'extra	B0336.10.3	No miss exon.	3 primer extra: exon 3 to 3	57780b94-a2da-4b96-ac66-afabcbed452c
B0336.10_NP20	B0336.10	8.28606	0.753278	6.7795	0.753278	21501.1	2821.94	8896.7	9782.41	0.000266936	0.000762024	7.70033e-05	Missing_UTR	B0336.10.3	No miss exon.	No extra exon.	59dd7270-91b9-429b-8f1f-9d6888bbacb0
B0336.10_NP21	B0336.10	6652.77	615.84	2386.14	3650.78	21501.1	2821.94	8896.7	9782.41	0.218233	0.268205	0.373199	Missing_UTR	B0336.10.3	No miss exon.	No extra exon.	5c443751-64bd-4f08-a162-373ff51fb6e1
B0336.10_NP22	B0336.10	580.548	107.918	375.113	97.5165	21501.1	2821.94	8896.7	9782.41	0.0382425	0.0421632	0.00996855	Missing_UTR	B0336.10.3	No miss exon.	No extra exon.	602c3e73-4c4d-4040-8a80-262ac0d7cd94
B0336.10_NP23	B0336.10	5607.38	799.456	1936.6	2871.32	21501.1	2821.94	8896.7	9782.41	0.2833	0.217677	0.293519	Extra_UTR	B0336.10.3	No miss exon.	No extra exon.	6475ccb8-cc72-42fa-ad68-2725f0b0d33c
B0336.10_NP24	B0336.10	11.0152	0.847326	4.66029	5.50762	21501.1	2821.94	8896.7	9782.41	0.000300263	0.000523822	0.000563013	Missing_UTR	B0336.10.3	No miss exon.	No extra exon.	70e01f3a-7e2f-4359-b9dd-dca64e99fe14
B0336.10_NP25	B0336.10	8.90881	0.832599	3.24713	4.82907	21501.1	2821.94	8896.7	9782.41	0.000295045	0.000364982	0.000493649	5'extra	B0336.10.3	5 primer miss: exon 1 to 1	5 primer extra: exon 1 to 1	718a0e3b-390c-49d6-9f39-341b3555d7c8
B0336.10_NP26	B0336.10	1081.76	169.274	761.731	150.759	21501.1	2821.94	8896.7	9782.41	0.0599848	0.0856195	0.0154113	Missing_UTR	B0336.10.3	No miss exon.	No extra exon.	77505009-8e9d-4103-ae0c-1b8f9491191d
B0336.10_NP27	B0336.10	12.8423	1.32851	6.95886	4.55489	21501.1	2821.94	8896.7	9782.41	0.000470778	0.000782184	0.00046562	3'extra	B0336.10.3	No miss exon.	3 primer extra: exon 3 to 3	8531acb2-b07b-4fb1-880e-00743bdc80f2
B0336.10_NP28	B0336.10	63.792	7.50494	35.9165	20.3706	21501.1	2821.94	8896.7	9782.41	0.0026595	0.00403706	0.00208237	Missing_UTR	B0336.10.3	No miss exon.	No extra exon.	8917be43-813b-4d2f-affd-f87556fe7450
B0336.10_NP29	B0336.10	22.3868	4.72222	7.17078	10.4938	21501.1	2821.94	8896.7	9782.41	0.00167339	0.000806004	0.00107272	Missing_UTR	B0336.10.3	No miss exon.	No extra exon.	8b162836-d448-4ad3-aeb0-10a0b68d89fe
B0336.10_NP30	B0336.10	19.1081	2.07375	5.925	11.1094	21501.1	2821.94	8896.7	9782.41	0.000734866	0.000665977	0.00113565	Missing_UTR	B0336.10.3	No miss exon.	No extra exon.	939df52b-22d8-4332-809c-f292b2bfc42c
B0336.10_NP31	B0336.10	111.88	19.1794	86.7639	5.93648	21501.1	2821.94	8896.7	9782.41	0.00679652	0.00975236	0.000606852	Missing_UTR	B0336.10.3	No miss exon.	No extra exon.	98d07237-4c35-4d61-a310-d2cb10ec4417
B0336.10_NP32	B0336.10	12.0683	1.26087	6.60456	4.2029	21501.1	2821.94	8896.7	9782.41	0.00044681	0.000742361	0.000429639	3'extra	B0336.10.3	No miss exon.	3 primer extra: exon 3 to 3	9f30a9a5-8e26-43ae-9c96-40e46d563814
B0336.10_NP33	B0336.10	20.4189	3.00278	6.60611	10.81	21501.1	2821.94	8896.7	9782.41	0.00106408	0.000742534	0.00110504	Missing_UTR	B0336.10.3	No miss exon.	No extra exon.	a832efad-1d4d-4b2e-af45-dfcb85e3278f
B0336.10_NP34	B0336.10	13.2376	1.39693	7.18421	4.65643	21501.1	2821.94	8896.7	9782.41	0.000495024	0.000807514	0.000476001	Missing_UTR	B0336.10.3	No miss exon.	No extra exon.	b64b8517-069d-41db-b326-335fe3fb685f
B0336.10_NP35	B0336.10	8.15418	1.48799	3.15454	3.51166	21501.1	2821.94	8896.7	9782.41	0.000527293	0.000354574	0.000358977	Missing_UTR	B0336.10.3	No miss exon.	No extra exon.	c63fd0f5-b6ee-407e-bd3a-fce341c47c94
B0336.10_NP36	B0336.10	11.6988	1.76843	4.08098	5.84941	21501.1	2821.94	8896.7	9782.41	0.00062667	0.000458707	0.000597952	Missing_UTR	B0336.10.3	No miss exon.	No extra exon.	ca28bbe4-bc79-4557-b06b-9ed76aae2e1e
B0336.10_NP37	B0336.10	27.9456	3.05416	14.3545	10.5369	21501.1	2821.94	8896.7	9782.41	0.00108229	0.00161347	0.00107712	3'extra	B0336.10.3	No miss exon.	3 primer extra: exon 3 to 3	ce1faf85-128b-4043-8ef2-33bf704b93ef
B0336.10_NP38	B0336.10	302.712	45.0076	183.66	74.0448	21501.1	2821.94	8896.7	9782.41	0.0159492	0.0206436	0.00756917	Missing_UTR	B0336.10.3	No miss exon.	No extra exon.	cedc5a44-7ee5-4d39-a6d0-f9ff140ac6bf
B0336.10_NP39	B0336.10	52.3268	6.99022	23.9665	21.3701	21501.1	2821.94	8896.7	9782.41	0.0024771	0.00269386	0.00218454	3'extra	B0336.10.3	No miss exon.	3 primer extra: exon 3 to 3	d96addfc-5f15-480b-8ef2-18388978800e
B0336.10_NP40	B0336.10	67.6897	10.3607	29.2401	28.0889	21501.1	2821.94	8896.7	9782.41	0.00367147	0.00328662	0.00287137	5'extra	B0336.10.3	No miss exon.	5 primer extra: exon 1 to 1	e03099dc-104c-42ae-8d21-3ed89ccd872a
B0336.10_NP41	B0336.10	1800.26	242.986	947.351	609.925	21501.1	2821.94	8896.7	9782.41	0.086106	0.106483	0.0623492	Missing_UTR	B0336.10.3	No miss exon.	No extra exon.	e3e47929-3bb4-4694-a8a8-3e7583a0befc
B0336.10_NP42	B0336.10	11.9108	1.26327	6.49683	4.15075	21501.1	2821.94	8896.7	9782.41	0.00044766	0.000730251	0.000424308	3'extra	B0336.10.3	No miss exon.	3 primer extra: exon 3 to 3	e604a631-aff0-4add-ba6d-2da0558196d5
B0336.10_NP43	B0336.10	13.0295	2.18616	4.89701	5.94636	21501.1	2821.94	8896.7	9782.41	0.000774702	0.000550429	0.000607863	Missing_UTR	B0336.10.3	No miss exon.	No extra exon.	e97b9ef6-ad40-4396-a712-853793ca96f1
B0336.10_NP44	B0336.10	5.57177	1.50588	1.12941	2.93647	21501.1	2821.94	8896.7	9782.41	0.000533634	0.000126947	0.000300179	New_junction	NA	NA	NA	eb41c660-0c71-483a-934e-b54c21213f3f
B0336.10_NP45	B0336.10	12.3309	2.53375	4.13846	5.65871	21501.1	2821.94	8896.7	9782.41	0.000897875	0.000465168	0.000578458	Missing_UTR	B0336.10.3	No miss exon.	No extra exon.	f2c9052c-33b4-4820-aaca-ff571e5f3758
B0336.10_NP46	B0336.10	6.39622	0.548248	2.31482	3.53315	21501.1	2821.94	8896.7	9782.41	0.00019428	0.000260189	0.000361174	5'extra	B0336.10.3	No miss exon.	5 primer extra: exon 1 to 1	f5b8a572-c900-47ee-af59-25755af5e487
B0336.10_NP47	B0336.10	5.7208	1.36209	1.18048	3.17822	21501.1	2821.94	8896.7	9782.41	0.00048268	0.000132688	0.000324891	New_junction	NA	NA	NA	f97d89ff-3985-47e9-b150-8ca49f8a5cc1
B0336.10_NP48	B0336.10	14.8021	1.80513	8.5443	4.45266	21501.1	2821.94	8896.7	9782.41	0.000639678	0.000960389	0.00045517	Extra_UTR	B0336.10.3	No miss exon.	No extra exon.	fe25181b-2766-44ef-83c8-722e64eccf7d
B0336.11_NP1	B0336.11	11.8458	2.96145	5.18255	3.70182	126.802	43.4267	70.1436	13.2314	0.0681943	0.0738847	0.279774	Extra_UTR	B0336.11a.1	No miss exon.	No extra exon.	8e98a5ac-6686-4bc5-9e2b-a7ecb3ce9c96
B0336.13_NP1	B0336.13	102.592	45.6385	9.42945	47.5244	348.095	160.685	33.2122	154.197	0.284024	0.283915	0.308206	Missing_UTR	B0336.13.1	No miss exon.	No extra exon.	10b66a49-95a0-4f8a-8027-f6204f46a82c
B0336.13_NP1	B0336.13	30.7283	17.9941	4.15248	8.58179	348.095	160.685	33.2122	154.197	0.111983	0.125029	0.0556546	Extra_UTR	B0336.13.1	No miss exon.	No extra exon.	1fcab6bb-2207-4d66-880b-a94c4aed0e2c
B0336.13_NP2	B0336.13	101.597	44.9446	9.44213	47.2107	348.095	160.685	33.2122	154.197	0.279705	0.284297	0.306171	Extra_UTR	B0336.13.1	No miss exon.	No extra exon.	d72d7ad3-a646-4d9a-92ec-90312fc5d6f7
B0336.13_NP3	B0336.13	7.99718	3.49877	0.249912	4.2485	348.095	160.685	33.2122	154.197	0.021774	0.0075247	0.0275524	3'extra	B0336.13.1	No miss exon.	3 primer extra: exon 3 to 3	ee59369f-d64f-4fa7-8a74-71224e53f7d9
B0336.2_NP1	B0336.2	6.0013	3.23666	1.14632	1.61833	2110.45	1056.35	321.941	732.162	0.00306401	0.00356064	0.00221034	Missing_UTR	B0336.2.3	No miss exon.	No extra exon.	094b96f1-76c8-4159-b206-9d16a819891c
B0336.2_NP1	B0336.2	12.8455	6.47414	2.15805	4.21333	2110.45	1056.35	321.941	732.162	0.00612879	0.00670323	0.00575464	5'missing	B0336.2.3	5 primer miss: exon 1 to 1	No extra exon.	0f7ef944-2c81-4081-ac89-862162b66057
B0336.2_NP2	B0336.2	48.4828	26.9037	6.72593	14.8531	2110.45	1056.35	321.941	732.162	0.0254686	0.0208918	0.0202866	5'missing	B0336.2.3	5 primer miss: exon 1 to 2	No extra exon.	137ea7df-272c-4e85-8b4d-cb2eacda76b6
B0336.2_NP3	B0336.2	7.45018	3.78932	1.22029	2.44058	2110.45	1056.35	321.941	732.162	0.00358719	0.00379041	0.00333338	Missing_UTR	B0336.2.3	No miss exon.	No extra exon.	1d1fa43b-502b-425f-a16e-2be5afa8d049
B0336.2_NP4	B0336.2	133.223	66.0731	22.2638	44.8866	2110.45	1056.35	321.941	732.162	0.0625486	0.0691547	0.061307	3'extra	B0336.2.3	No miss exon.	3 primer extra: exon 5 to 5	22af2214-a4dd-4390-bcf3-d920c8bffb8d
B0336.2_NP5	B0336.2	22.3163	13.8557	3.5559	4.90469	2110.45	1056.35	321.941	732.162	0.0131166	0.0110452	0.00669891	3'extra	B0336.2.3	No miss exon.	3 primer extra: exon 5 to 5	2da06868-ad90-4365-b646-7832e80519bf
B0336.2_NP6	B0336.2	15.062	7.89966	2.31723	4.84512	2110.45	1056.35	321.941	732.162	0.00747828	0.00719769	0.00661756	Missing_UTR	B0336.2.3	No miss exon.	No extra exon.	3627c1d5-f21c-4ef5-901b-a11085558ca6
B0336.2_NP7	B0336.2	8.24236	4.30682	1.41085	2.52469	2110.45	1056.35	321.941	732.162	0.00407709	0.00438233	0.00344826	Missing_UTR	B0336.2.1	No miss exon.	No extra exon.	42e7689d-0df0-438f-b8bf-7478b6c1a77e
B0336.2_NP8	B0336.2	13.3123	8.73618	1.66403	2.91206	2110.45	1056.35	321.941	732.162	0.00827017	0.00516875	0.00397734	3'extra	B0336.2.3	No miss exon.	3 primer extra: exon 5 to 5	4da9509f-c537-4310-9f33-c8d7b61e9495
B0336.2_NP9	B0336.2	7.83546	4.68663	1.09843	2.0504	2110.45	1056.35	321.941	732.162	0.00443663	0.00341189	0.00280047	3'extra	B0336.2.3	No miss exon.	3 primer extra: exon 5 to 5	4fb1e68b-6258-4aeb-b3de-ac307fb7bc2c
B0336.2_NP10	B0336.2	9.12336	4.86579	1.41919	2.83838	2110.45	1056.35	321.941	732.162	0.00460624	0.00440822	0.00387671	3'extra	B0336.2.3	5 primer miss: exon 1 to 1	3 primer extra: exon 4 to 4	4fe38947-8a29-4f5d-94d4-d512064d52f3
B0336.2_NP11	B0336.2	773.607	401.13	109.346	263.132	2110.45	1056.35	321.941	732.162	0.379732	0.339645	0.35939	Extra_UTR	B0336.2.3	No miss exon.	No extra exon.	5b1246e5-e088-4dcf-912a-e36346a81a70
B0336.2_NP12	B0336.2	6.9414	4.15053	1.00185	1.78902	2110.45	1056.35	321.941	732.162	0.00392913	0.00311191	0.00244348	5'missing	B0336.2.3	5 primer miss: exon 1 to 1	No extra exon.	64513e75-0b65-41e6-93e6-7396f00778c4
B0336.2_NP13	B0336.2	9.26882	6.21986	1.4635	1.58546	2110.45	1056.35	321.941	732.162	0.00588808	0.00454585	0.00216545	3'extra	B0336.2.3	No miss exon.	3 primer extra: exon 5 to 5	7505fc10-a3d7-459d-b83c-15ec51b89839
B0336.2_NP14	B0336.2	10.1219	5.28891	1.64139	3.19158	2110.45	1056.35	321.941	732.162	0.00500679	0.0050984	0.00435913	Missing_UTR	B0336.2.1	No miss exon.	No extra exon.	77fe7641-a53f-40ec-9260-084500dac1d5
B0336.2_NP15	B0336.2	6.43714	3.30716	1.06301	2.06697	2110.45	1056.35	321.941	732.162	0.00313075	0.00330189	0.00282311	3'extra	B0336.2.3	5 primer miss: exon 1 to 3;3 primer miss: exon 2 to 4	5 primer extra: exon 1 to 1;3 primer extra: exon 2 to 2	8ea71c31-1299-4a84-aa0d-8a495bdefaf4
B0336.2_NP16	B0336.2	7.76386	3.95251	1.27045	2.5409	2110.45	1056.35	321.941	732.162	0.00374168	0.00394622	0.00347041	3'missing	B0336.2.3	5 primer miss: exon 1 to 3;3 primer miss: exon 2 to 4	No extra exon.	99e1c319-0146-433f-9f59-6a1b726be94a
B0336.2_NP17	B0336.2	15.2295	8.86648	2.92072	3.44228	2110.45	1056.35	321.941	732.162	0.00839352	0.00907222	0.00470153	3'extra	B0336.2.3	No miss exon.	3 primer extra: exon 5 to 5	d0ea37e5-0888-446f-8bfb-ff7d645c54a9
B0336.2_NP18	B0336.2	150.707	36.1283	32.3434	82.2349	2110.45	1056.35	321.941	732.162	0.0342011	0.100464	0.112318	Extra_UTR	B0336.2.3	No miss exon.	No extra exon.	e57df2cd-659b-426c-a3e0-bbbcc0da5ab8
B0336.2_NP19	B0336.2	6.19017	3.73862	0.858043	1.59351	2110.45	1056.35	321.941	732.162	0.00353919	0.00266521	0.00217644	3'extra	B0336.2.3	5 primer miss: exon 1 to 1	3 primer extra: exon 4 to 4	e76146ac-e1c1-4599-9711-ddf80fc9c88c
B0336.2_NP20	B0336.2	215.699	110.839	32.1938	72.6661	2110.45	1056.35	321.941	732.162	0.104926	0.099999	0.0992487	3'missing	B0336.2.3	5 primer miss: exon 1 to 3;3 primer miss: exon 2 to 4	No extra exon.	ea349088-13d1-4a11-b822-bdddcd818cb5
B0336.2_NP21	B0336.2	7.37999	3.82418	1.27473	2.28109	2110.45	1056.35	321.941	732.162	0.00362019	0.0039595	0.00311555	Missing_UTR	B0336.2.3	No miss exon.	No extra exon.	ec7a1968-7860-4f37-9a74-28e5fa5d8b81
B0336.3_NP1	B0336.3	13.8191	6.3139	2.3826	5.12259	251.404	123.989	40.3887	87.0268	0.050923	0.0589918	0.0588622	5'missing	B0336.3d.1	5 primer miss: exon 1 to 4	No extra exon.	03c434ae-685f-452a-b1ce-7c19eceda776
B0336.3_NP1	B0336.3	34.3491	16.3219	5.35943	12.6678	251.404	123.989	40.3887	87.0268	0.13164	0.132696	0.145561	5'missing	B0336.3b.1	5 primer miss: exon 1 to 1	No extra exon.	1afa1532-f36d-4f15-a94e-a5b20043b4e7
B0336.3_NP2	B0336.3	6.49533	2.64941	1.11104	2.73487	251.404	123.989	40.3887	87.0268	0.0213681	0.0275088	0.0314256	5'missing	B0336.3d.1	5 primer miss: exon 1 to 3	No extra exon.	25debefb-2ba1-4068-9683-1e2bac78ebb3
B0336.3_NP3	B0336.3	6.49533	2.64941	1.11104	2.73487	251.404	123.989	40.3887	87.0268	0.0213681	0.0275088	0.0314256	5'missing	B0336.3d.1	5 primer miss: exon 1 to 3	No extra exon.	3f346629-97f7-41fc-a1ad-a39b7b8ca325
B0336.3_NP4	B0336.3	10.5023	4.30594	1.78539	4.41096	251.404	123.989	40.3887	87.0268	0.0347284	0.0442052	0.0506851	Missing_UTR	B0336.3b.1	No miss exon.	No extra exon.	6b58c5cb-a549-48b9-94fb-94c38c1916e3
B0336.3_NP5	B0336.3	16.3705	7.41569	2.79837	6.15642	251.404	123.989	40.3887	87.0268	0.0598093	0.0692861	0.0707416	5'missing	B0336.3d.1	5 primer miss: exon 1 to 3	No extra exon.	6e2ba6f5-1ad8-4638-9308-988a265173d1
B0336.3_NP6	B0336.3	8.22006	3.30807	1.40343	3.50856	251.404	123.989	40.3887	87.0268	0.0266804	0.034748	0.0403159	3'extra	B0336.3d.1	5 primer miss: exon 1 to 3	3 primer extra: exon 5 to 5	838be0c0-dc44-4ba7-af15-2c157dea76bd
B0336.3_NP7	B0336.3	7.02601	2.79239	1.26108	2.97254	251.404	123.989	40.3887	87.0268	0.0225213	0.0312236	0.0341566	3'extra	B0336.3d.1	5 primer miss: exon 1 to 3	3 primer extra: exon 5 to 5	8dbf341a-4d62-4137-918e-276edd618049
B0336.3_NP8	B0336.3	9.98902	4.23065	1.64525	4.11313	251.404	123.989	40.3887	87.0268	0.0341211	0.0407354	0.0472627	3'extra	B0336.3b.1	5 primer miss: exon 1 to 2	3 primer extra: exon 7 to 7	b88ad01b-ffa0-4e73-8dd5-c60cd478f88e
B0336.3_NP9	B0336.3	14.0487	6.2977	2.42219	5.32882	251.404	123.989	40.3887	87.0268	0.0507924	0.0599721	0.061232	3'missing	B0336.3d.1	5 primer miss: exon 1 to 3;3 primer miss: exon 7 to 7	No extra exon.	b9a5a420-600a-4597-9ccb-c31237a79c97
B0336.3_NP10	B0336.3	49.6064	24.6615	7.93702	17.0079	251.404	123.989	40.3887	87.0268	0.1989	0.196516	0.195433	Extra_UTR	B0336.3b.1	No miss exon.	No extra exon.	c1b2aedc-b120-48d2-b515-b4e3cfbd98f6
B0336.3_NP11	B0336.3	10.6229	4.41744	1.78801	4.41744	251.404	123.989	40.3887	87.0268	0.0356277	0.0442701	0.0507596	Missing_UTR	B0336.3b.1	No miss exon.	No extra exon.	c951d64d-f680-407b-aadb-a47a73cd8179
B0336.3_NP12	B0336.3	7.15869	2.88207	1.30158	2.97504	251.404	123.989	40.3887	87.0268	0.0232446	0.0322263	0.0341853	5'missing	B0336.3b.1	5 primer miss: exon 1 to 1	No extra exon.	e2416af7-73b4-4df6-a8bb-6fd1c4023845
B0336.3_NP13	B0336.3	14.5794	6.54838	2.47109	5.55994	251.404	123.989	40.3887	87.0268	0.0528142	0.0611826	0.0638877	3'missing	B0336.3d.1	5 primer miss: exon 1 to 3;3 primer miss: exon 7 to 7	No extra exon.	e3c20d6a-7519-4d0f-a83c-ad907c2cb08c
B0336.3_NP14	B0336.3	8.26429	3.45217	1.46456	3.34756	251.404	123.989	40.3887	87.0268	0.0278426	0.0362616	0.0384658	3'missing	B0336.3b.1	5 primer miss: exon 1 to 3;3 primer miss: exon 8 to 8	No extra exon.	fc85e99a-bdf0-44c6-a2f8-c55645f0c921
B0336.4_NP1	B0336.4	80.6094	49.7589	14.9277	15.9228	115.425	74.0519	17.7499	23.623	0.671946	0.841002	0.67404	New_junction	NA	NA	NA	6aa54061-1e77-47b1-ae29-69efce0f3bcd
B0336.4_NP1	B0336.4	5.64962	4.36562	0.513602	0.770403	115.425	74.0519	17.7499	23.623	0.0589535	0.0289356	0.0326124	New_junction	NA	NA	NA	7d7d89fb-03e5-4cc2-a740-3d62cafea1ae
B0336.4_NP2	B0336.4	10.9565	8.03477	1.09565	1.82608	115.425	74.0519	17.7499	23.623	0.108502	0.0617273	0.0773011	3'extra	B0336.4a.1	No miss exon.	3 primer extra: exon 8 to 8	f512cc39-3a75-4586-be2b-3ad628ba0ba4
B0336.5_NP1	B0336.5	5.90256	3.48788	0.804895	1.60979	163.538	73.3823	8.99778	81.1578	0.0475302	0.0894549	0.0198353	5'missing	B0336.5b.1	5 primer miss: exon 1 to 1	No extra exon.	0d5dbb5e-a588-4136-bb63-b9894a309a26
B0336.5_NP1	B0336.5	6.72071	2.95711	0.806485	2.95711	163.538	73.3823	8.99778	81.1578	0.0402973	0.0896316	0.0364366	Intron_retention	B0336.5b.1	Intron retention: intron 2 to 2	No extra exon.	15d09307-e5e6-4356-bd91-a42a7adf5655
B0336.5_NP2	B0336.5	8.65551	4.48804	0.320574	3.84689	163.538	73.3823	8.99778	81.1578	0.0611597	0.0356282	0.0474002	5'missing	B0336.5b.1	5 primer miss: exon 1 to 1	No extra exon.	2dcabe00-222b-4194-8259-5c46c94b0a68
B0336.5_NP3	B0336.5	34.0954	16.7486	2.39266	14.9541	163.538	73.3823	8.99778	81.1578	0.228238	0.265917	0.18426	Missing_UTR	B0336.5b.1	No miss exon.	No extra exon.	a4f8ec4e-2308-4b44-9b80-b7c8477dceca
B0336.5_NP4	B0336.5	5.02914	2.82889	0.314321	1.88593	163.538	73.3823	8.99778	81.1578	0.03855	0.0349332	0.0232378	5'missing	B0336.5b.1	5 primer miss: exon 1 to 2	No extra exon.	c68f3e81-ef20-46eb-ac43-a638675cd75a
B0336.5_NP5	B0336.5	32.8034	15.2016	0.800083	16.8017	163.538	73.3823	8.99778	81.1578	0.207156	0.0889201	0.207026	5'missing	B0336.5b.1	5 primer miss: exon 1 to 1	No extra exon.	dac87704-9b68-44af-bad9-d7195caa93f7
B0336.6_NP1	B0336.6	10.8472	4.61008	1.62709	4.61008	512.986	174.53	62.7007	275.755	0.0264142	0.0259501	0.016718	5'missing	B0336.6.1	5 primer miss: exon 1 to 3	No extra exon.	61e01916-3dcf-430a-9fb9-21451f0e2fd3
B0336.6_NP1	B0336.6	14.6063	6.90479	2.39012	5.31137	512.986	174.53	62.7007	275.755	0.0395621	0.0381195	0.0192612	5'missing	B0336.6.1	5 primer miss: exon 1 to 1	No extra exon.	6bca84ca-9263-4ca3-8ce4-78b27e40fea3
B0336.6_NP2	B0336.6	6.10895	2.96191	1.11072	2.03632	512.986	174.53	62.7007	275.755	0.0169708	0.0177146	0.0073845	5'missing	B0336.6.1	5 primer miss: exon 1 to 3	No extra exon.	9886a1b2-5543-4f0f-9c0b-75b369a0b325
B0336.6_NP3	B0336.6	191.06	62.1582	21.9082	106.994	512.986	174.53	62.7007	275.755	0.356146	0.34941	0.388002	Extra_UTR	B0336.6.1	No miss exon.	No extra exon.	9c05b44f-bf21-40b0-ade1-60308206abb2
B0336.6_NP4	B0336.6	18.3653	8.29402	2.66593	7.40537	512.986	174.53	62.7007	275.755	0.0475219	0.0425184	0.0268548	5'missing	B0336.6.1	5 primer miss: exon 1 to 1	No extra exon.	d5664200-e8fd-4ed9-9bd3-5b915579146d
B0336.7_NP1	B0336.7	10.838	4.51585	0	6.32219	124.377	53.113	11.9685	59.2955	0.0850236	0	0.106622	Extra_UTR	B0336.7b.1	No miss exon.	No extra exon.	3ce14ad4-c956-4b59-894f-262524f45b6c
B0336.7_NP1	B0336.7	5.41744	3.44746	0	1.96998	124.377	53.113	11.9685	59.2955	0.0649082	0	0.0332231	3'missing	B0336.7a.1	3 primer miss: exon 6 to 6	No extra exon.	701be68c-3aa5-443f-acd0-6d2ff10b8484
B0336.7_NP2	B0336.7	39.3625	16.3506	3.63347	19.3785	124.377	53.113	11.9685	59.2955	0.307846	0.303586	0.326812	Extra_UTR	B0336.7b.1	No miss exon.	No extra exon.	7143ea8f-6107-4e26-b19c-b0237c89d042
B0336.7_NP3	B0336.7	5.84073	2.72567	0	3.11506	124.377	53.113	11.9685	59.2955	0.0513184	0	0.0525345	Intron_retention	B0336.7b.1	Intron retention: intron 2 to 2;3 primer miss: exon 5 to 5	No extra exon.	bd2df8b6-5e52-4adb-81d9-354d031489c4
B0336.7_NP4	B0336.7	41.1094	16.9658	5.22024	18.9234	124.377	53.113	11.9685	59.2955	0.319428	0.436165	0.319137	Missing_UTR	B0336.7a.1	No miss exon.	No extra exon.	e751ed7a-3252-4241-9fe0-22955f4cd300
B0336.8_NP1	B0336.8	169.61	63.6038	26.9093	79.0971	299.695	118.977	47.476	133.242	0.53459	0.566798	0.593633	Extra_UTR	B0336.8.1	No miss exon.	No extra exon.	304112d0-0f68-4a95-bda0-9f37166e178c
B0336.8_NP1	B0336.8	65.6395	26.1343	10.3321	29.1731	299.695	118.977	47.476	133.242	0.219658	0.217629	0.218948	Extra_UTR	B0336.8.1	No miss exon.	No extra exon.	34ff606d-a7b1-408b-84f6-bb69f8469a8c
B0336.8_NP2	B0336.8	14.3839	9.74391	3.24797	1.39199	299.695	118.977	47.476	133.242	0.0818976	0.0684128	0.010447	3'missing	B0336.8.1	3 primer miss: exon 3 to 3	No extra exon.	98621cd1-4fdc-4fc2-8c8e-8643d0e35651
B0336.8_NP3	B0336.8	5.17421	2.8223	2.35191	0	299.695	118.977	47.476	133.242	0.0237214	0.049539	0	3'missing	B0336.8.1	3 primer miss: exon 3 to 3	No extra exon.	ef3b10b4-c1bd-49b4-b1b2-d9afbce2b1d5
B0336.9_NP1	B0336.9	17.4214	6.96856	4.25857	6.19428	98.0033	38.6922	21.8404	37.4708	0.180103	0.194986	0.16531	Extra_UTR	B0336.9b.2	No miss exon.	No extra exon.	5505b76c-8db3-4f5d-b8a5-ea386115f432
B0336.9_NP1	B0336.9	10.7436	4.40762	2.20381	4.13215	98.0033	38.6922	21.8404	37.4708	0.113915	0.100905	0.110276	Intron_retention	B0336.9d.1	Intron retention: intron 5 to 5	No extra exon.	64a961b9-9fdf-44bf-886b-2350e4bd186f
B0336.9_NP2	B0336.9	20.694	6.25632	4.81256	9.62511	98.0033	38.6922	21.8404	37.4708	0.161695	0.220351	0.25687	Intron_retention	B0336.9d.1	Intron retention: intron 2 to 2	No extra exon.	6f4ec12c-b1f8-423d-89d7-2d7971fbe807
B0336.9_NP3	B0336.9	16.1831	6.56073	3.06167	6.56073	98.0033	38.6922	21.8404	37.4708	0.169562	0.140184	0.175089	Extra_UTR	B0336.9d.1	No miss exon.	No extra exon.	773b6357-193c-4b6d-996d-1bdf43b4a71b
B0344.2_NP1	B0344.2	7.73921	4.837	2.9022	0	15.9207	13.0184	2.9022	0	0.37155	1	NA	Extra_UTR	B0344.2.1	No miss exon.	No extra exon.	22724ac0-4f95-4452-b4d5-154225b201ee
B0344.2_NP1	B0344.2	5.08576	5.08576	0	0	15.9207	13.0184	2.9022	0	0.390658	0	NA	5'missing	B0344.2.1	5 primer miss: exon 1 to 1	No extra exon.	d52b6635-c3c1-4e2f-aded-affeedb907ca
B0348.4_NP1	B0348.4	17.8002	8.90009	5.56255	3.33753	43.229	19.4368	12.8076	10.3212	0.457899	0.434317	0.323365	Extra_UTR	B0348.4h.1	No miss exon.	No extra exon.	7a7f3a66-acf1-48c6-b4d0-5d44c8676110
B0348.4_NP1	B0348.4	8.09099	1.6182	3.2364	3.2364	43.229	19.4368	12.8076	10.3212	0.0832543	0.252694	0.313566	Extra_UTR	B0348.4k.1	No miss exon.	No extra exon.	d161ed71-220b-4e02-a854-7a47d1be0480
B0348.4_NP2	B0348.4	8.29201	3.3168	2.4876	2.4876	43.229	19.4368	12.8076	10.3212	0.170646	0.194229	0.241018	Extra_exon	B0348.4f.1	Intron retention: intron 7 to 7	Exon extra: exon 12 to 12	d2bcb0c2-58f7-4cae-b76d-64b1ce36c3f2
B0348.6_NP1	B0348.6	5.04778	0.976989	0.162832	3.90796	876.428	130.93	75.5472	669.95	0.0074619	0.00215536	0.0058332	3'missing	B0348.6b.2	3 primer miss: exon 3 to 4	No extra exon.	0974ddc9-5096-4349-bce4-8d2ff059c355
B0348.6_NP1	B0348.6	13.9937	2.33229	0.874607	10.7868	876.428	130.93	75.5472	669.95	0.0178132	0.011577	0.0161009	3'missing	B0348.6b.2	3 primer miss: exon 4 to 4	No extra exon.	2bd15ca4-8716-4669-8eac-379d6f23fc84
B0348.6_NP2	B0348.6	44.5525	4.60053	3.14773	36.8043	876.428	130.93	75.5472	669.95	0.0351373	0.0416658	0.0549358	Intron_retention	B0348.6b.2	Intron retention: intron 2 to 2	No extra exon.	2d07c54d-bc9c-4d8d-9267-ba82fcae43f0
B0348.6_NP3	B0348.6	41.9433	3.81303	3.01028	35.12	876.428	130.93	75.5472	669.95	0.0291226	0.0398464	0.0524218	Missing_UTR	B0348.6b.2	No miss exon.	No extra exon.	413a709f-f328-4668-9c1b-94a2acc52e5c
B0348.6_NP4	B0348.6	5.97648	1.40623	0.351558	4.21869	876.428	130.93	75.5472	669.95	0.0107403	0.00465349	0.00629702	3'missing	B0348.6b.2	3 primer miss: exon 4 to 4	No extra exon.	42558d4e-6d62-4653-bfa4-bf1a371dd6a7
B0348.6_NP5	B0348.6	44.184	4.01673	3.59391	36.5733	876.428	130.93	75.5472	669.95	0.0306784	0.0475718	0.0545911	5'missing	B0348.6b.2	5 primer miss: exon 1 to 1	No extra exon.	491a34f1-eead-4429-b4d4-d543f1523c65
B0348.6_NP6	B0348.6	82.3862	10.0323	6.08016	66.2738	876.428	130.93	75.5472	669.95	0.0766229	0.0804817	0.0989234	5'missing	B0348.6b.2	5 primer miss: exon 1 to 1	No extra exon.	53779483-2d82-44c3-b5b1-aeec49e40184
B0348.6_NP7	B0348.6	41.4421	3.86507	3.00616	34.5709	876.428	130.93	75.5472	669.95	0.02952	0.0397919	0.0516021	3'missing	B0348.6b.2	5 primer miss: exon 1 to 3;3 primer miss: exon 2 to 4	No extra exon.	577dfc3a-f695-443b-a6a8-37178dfdf6ee
B0348.6_NP8	B0348.6	6.64616	1.22429	0.524697	4.89717	876.428	130.93	75.5472	669.95	0.00935072	0.00694529	0.00730975	5'missing	B0348.6b.2	5 primer miss: exon 1 to 1	No extra exon.	7d15083d-0b9c-43f5-8073-801d0a1fcd11
B0348.6_NP9	B0348.6	343.927	51.5891	28.8455	263.493	876.428	130.93	75.5472	669.95	0.394019	0.381821	0.393302	Extra_UTR	B0348.6b.2	No miss exon.	No extra exon.	a6516211-ca5a-46b1-8142-966c2dc789a1
B0348.6_NP10	B0348.6	8.59202	1.90934	0.572801	6.10988	876.428	130.93	75.5472	669.95	0.0145829	0.00758203	0.0091199	5'missing	B0348.6b.2	5 primer miss: exon 1 to 2	No extra exon.	b05935b7-c5dd-48d6-bbf9-a0bd280a2e2c
B0348.6_NP11	B0348.6	21.2475	1.99195	1.65996	17.5956	876.428	130.93	75.5472	669.95	0.0152138	0.0219725	0.026264	Missing_UTR	B0348.6b.2	No miss exon.	No extra exon.	d74847e2-ef49-4f43-94a4-f308f738349f
B0353.1_NP1	B0353.1	24.3117	13.7414	6.34219	4.22813	236.021	162.46	47.4546	26.1066	0.0845835	0.133648	0.161956	5'missing	B0353.1d.1	5 primer miss: exon 1 to 2	No extra exon.	01ff92f5-f2eb-4ae7-bc06-fce6accb6211
B0353.1_NP1	B0353.1	30.6058	24.9679	4.83249	0.805415	236.021	162.46	47.4546	26.1066	0.153686	0.101834	0.030851	Extra_UTR	B0353.1d.1	No miss exon.	No extra exon.	02b81cf4-8ea7-4e7b-aa94-db6ca0ff1ccd
B0353.1_NP2	B0353.1	53.9466	35.9644	13.8953	4.08686	236.021	162.46	47.4546	26.1066	0.221374	0.292813	0.156545	Extra_UTR	B0353.1c.1	No miss exon.	No extra exon.	585ce093-460a-4109-8a03-3eda46bfc731
B0353.1_NP3	B0353.1	20.1152	15.5893	3.01728	1.50864	236.021	162.46	47.4546	26.1066	0.0959577	0.0635825	0.0577877	Extra_UTR	B0353.1a.1	No miss exon.	No extra exon.	5d64d9e5-6dd7-4f28-acbb-9f499ddf42a9
B0353.1_NP4	B0353.1	5.2954	3.88329	1.05908	0.353026	236.021	162.46	47.4546	26.1066	0.0239031	0.0223178	0.0135225	Intron_retention	B0353.1d.1	Intron retention: intron 4 to 4	No extra exon.	72f60ee7-9612-4968-b4a5-4bc740fd335b
B0353.1_NP5	B0353.1	22.7955	14.935	5.50236	2.35815	236.021	162.46	47.4546	26.1066	0.0919302	0.11595	0.090328	Fusion_gene	B0353.1b.1	5 primer miss: exon 1 to 1;3 primer miss: exon 7 to 9	5 primer extra: exon 1 to 6	80d32945-f8fd-4227-a567-503220af4d51
B0353.1_NP6	B0353.1	12.1817	7.54106	4.06057	0.580081	236.021	162.46	47.4546	26.1066	0.046418	0.0855675	0.0222198	New_junction	NA	NA	NA	8f614472-1992-4aed-8a51-f85d167404be
B0353.1_NP7	B0353.1	23.7826	19.0261	3.96377	0.792754	236.021	162.46	47.4546	26.1066	0.117113	0.0835277	0.0303661	5'missing	B0353.1d.1	5 primer miss: exon 1 to 1	No extra exon.	9be730c6-27b9-42a5-afc8-ec2e87568954
B0353.1_NP8	B0353.1	13.3315	11.2805	1.53825	0.512751	236.021	162.46	47.4546	26.1066	0.0694358	0.0324153	0.0196407	Intron_retention	B0353.1c.1	5 primer miss: exon 1 to 1;Intron retention: intron 6 to 6	No extra exon.	d5de7bea-cd46-4e20-9411-99e856557318
B0361.10_NP1	B0361.10	10.3553	6.51998	1.53411	2.30117	170.786	92.2762	30.1645	48.3456	0.0706573	0.0508582	0.0475983	5'extra	B0361.10.2	No miss exon.	5 primer extra: exon 1 to 7	84ea5f9d-2fe1-4867-b504-0c1c2475ce7a
B0361.10_NP1	B0361.10	101.615	52.0267	17.8842	31.7038	170.786	92.2762	30.1645	48.3456	0.563815	0.592888	0.655774	Extra_UTR	B0361.10.2	No miss exon.	No extra exon.	9280795f-df8b-4cd4-82a4-5a7676e3f0cd
B0361.2_NP1	B0361.2	21.8909	12.2589	2.62691	7.00509	181.761	67.893	37.9705	75.8973	0.180562	0.0691829	0.0922969	5'missing	B0361.2a.1	5 primer miss: exon 1 to 1	No extra exon.	68e8b1d8-92f2-453b-9af5-84b26d0a0aea
B0361.2_NP1	B0361.2	147.045	50.622	32.5427	63.8802	181.761	67.893	37.9705	75.8973	0.745615	0.857053	0.841666	Extra_UTR	B0361.2a.1	No miss exon.	No extra exon.	950b5db9-645d-4b7e-993d-44d0d5ed14eb
B0361.2_NP2	B0361.2	6.41248	2.13749	2.13749	2.13749	181.761	67.893	37.9705	75.8973	0.0314833	0.0562936	0.028163	3'extra	B0361.2a.1	No miss exon.	3 primer extra: exon 11 to 11	f968a9fc-387a-4bd3-b911-5efec821d108
B0361.3_NP1	B0361.3	9.46233	3.51458	2.43317	3.51458	119.405	48.5523	32.7239	38.1287	0.0723876	0.0743546	0.0921768	5'missing	B0361.3.1	5 primer miss: exon 1 to 1	No extra exon.	241fbb9c-aca0-4a1f-b867-866a6f410368
B0361.3_NP1	B0361.3	8.79897	3.77099	2.26259	2.76539	119.405	48.5523	32.7239	38.1287	0.0776686	0.0691419	0.0725278	5'missing	B0361.3.1	5 primer miss: exon 1 to 2	No extra exon.	2e1a4e23-d0b4-4fc0-aadc-14af774549f7
B0361.3_NP2	B0361.3	6.69833	2.5929	1.94468	2.16075	119.405	48.5523	32.7239	38.1287	0.0534044	0.0594268	0.05667	Intron_retention	B0361.3.1	Intron retention: intron 6 to 6	No extra exon.	dbdad846-8885-4d91-98ce-a0190f48069e
B0361.5_NP1	B0361.5	38.1556	9.5389	15.2622	13.3545	299.417	94.3714	92.7516	112.294	0.101078	0.16455	0.118924	5'missing	B0361.5a.1	5 primer miss: exon 1 to 1	No extra exon.	10fcb1f8-87ba-4ab2-97a9-9983d437f903
B0361.5_NP1	B0361.5	6.55244	2.29335	2.9486	1.31049	299.417	94.3714	92.7516	112.294	0.0243014	0.0317903	0.0116702	3'extra	B0361.5a.1	No miss exon.	3 primer extra: exon 5 to 5	219b497d-b357-4ea7-94af-1a20f60c2511
B0361.5_NP2	B0361.5	15.9504	4.65219	5.98139	5.31679	299.417	94.3714	92.7516	112.294	0.0492966	0.0644883	0.0473471	5'missing	B0361.5a.1	5 primer miss: exon 1 to 2	No extra exon.	4cad09c6-3a11-45e8-b99a-3907f114a965
B0361.5_NP3	B0361.5	69.8879	25.7059	16.8695	27.3125	299.417	94.3714	92.7516	112.294	0.272391	0.181878	0.243224	Extra_UTR	B0361.5b.1	No miss exon.	No extra exon.	52f7d0e3-8072-4148-b140-0f6ef06c9a6e
B0361.5_NP4	B0361.5	7.14506	3.24775	1.94865	1.94865	299.417	94.3714	92.7516	112.294	0.0344146	0.0210094	0.0173532	Missing_UTR	B0361.5b.1	No miss exon.	No extra exon.	90aa8d1d-78f0-4960-bf6b-869e005bc52f
B0361.5_NP5	B0361.5	94.1006	28.954	31.3669	33.7797	299.417	94.3714	92.7516	112.294	0.306809	0.338181	0.300815	Extra_UTR	B0361.5a.1	No miss exon.	No extra exon.	aa9d64e1-9f78-4f33-850f-00b0141f7b51
B0361.6_NP1	B0361.6	5.68595	2.52709	1.57943	1.57943	314.433	134.078	46.5146	133.841	0.0188479	0.0339556	0.0118008	3'missing	B0361.6.1	5 primer miss: exon 1 to 1;3 primer miss: exon 6 to 7	No extra exon.	03ec7106-5ca0-490f-a509-b50d20ec1966
B0361.6_NP1	B0361.6	5.68595	2.52709	1.57943	1.57943	314.433	134.078	46.5146	133.841	0.0188479	0.0339556	0.0118008	3'missing	B0361.6.1	3 primer miss: exon 6 to 7	No extra exon.	0519ee88-aad1-40b6-9403-77eacf1c024a
B0361.6_NP2	B0361.6	7.30012	5.47509	0.456258	1.36877	314.433	134.078	46.5146	133.841	0.0408352	0.00980892	0.0102269	5'missing	B0361.6.1	5 primer miss: exon 1 to 1	No extra exon.	2603b26b-b7ea-4136-86e7-15c9073327a6
B0361.6_NP3	B0361.6	35.6035	19.8961	5.23581	10.4716	314.433	134.078	46.5146	133.841	0.148392	0.112563	0.0782395	New_junction	NA	NA	NA	2ac6ed5b-fe45-4dd4-97ea-202bdf3e1db5
B0361.6_NP4	B0361.6	203.655	80.5765	27.4491	95.6292	314.433	134.078	46.5146	133.841	0.600968	0.590119	0.714501	Extra_UTR	B0361.6.1	No miss exon.	No extra exon.	30b12f06-babb-405b-aac6-55c05e143db8
B0361.7_NP1	B0361.7	83.3149	15.4287	20.0573	47.8289	183.091	44.9026	49.311	88.8771	0.343604	0.406751	0.538147	Extra_UTR	B0361.7.2	No miss exon.	No extra exon.	0ea13c2b-c2ab-4429-9c26-9ef017a32375
B0361.7_NP1	B0361.7	44.442	15.4581	11.5936	17.3903	183.091	44.9026	49.311	88.8771	0.344258	0.235111	0.195667	3'missing	B0361.7.2	3 primer miss: exon 6 to 7	No extra exon.	7ee07b44-f5df-49e9-8409-46fdeacc8f52
B0361.7_NP2	B0361.7	10.8981	3.06508	3.40565	4.42734	183.091	44.9026	49.311	88.8771	0.0682607	0.0690646	0.0498142	Extra_UTR	B0361.7.2	No miss exon.	No extra exon.	fb644ae7-9336-47d3-82ac-5a9f181cc5c3
B0361.8_NP1	B0361.8	14.4558	6.2642	3.85489	4.33675	295.831	92.5522	59.9223	143.356	0.0676828	0.0643314	0.0302515	3'missing	B0361.8.1	5 primer miss: exon 1 to 1;3 primer miss: exon 9 to 9	No extra exon.	36ae3a7f-a22a-41ee-b9e4-04a83fc47697
B0361.8_NP1	B0361.8	13.3186	5.66042	1.9978	5.66042	295.831	92.5522	59.9223	143.356	0.0611592	0.0333398	0.039485	5'missing	B0361.8.1	5 primer miss: exon 1 to 2	No extra exon.	72f422c9-74af-4da3-982a-cfd3642acf87
B0361.8_NP2	B0361.8	181.259	56.1904	33.533	91.536	295.831	92.5522	59.9223	143.356	0.607121	0.559608	0.63852	Extra_UTR	B0361.8.1	No miss exon.	No extra exon.	ea7de712-714b-4e44-8187-6e5134068222
B0361.8_NP3	B0361.8	19.1783	7.75294	4.0805	7.34489	295.831	92.5522	59.9223	143.356	0.0837683	0.0680964	0.0512352	5'missing	B0361.8.1	5 primer miss: exon 1 to 1	No extra exon.	eb8db8b6-ac25-4d61-91f5-1f489233a4c5
B0361.9_NP1	B0361.9	189.427	15.4497	151.81	22.167	449.604	37.3229	366.198	46.0834	0.413948	0.414558	0.481019	Extra_UTR	B0361.9.1	No miss exon.	No extra exon.	27df8b63-613a-4022-94ba-060486e0435a
B0361.9_NP1	B0361.9	11.8548	1.05376	10.2741	0.526879	449.604	37.3229	366.198	46.0834	0.0282336	0.0280562	0.0114332	3'extra	B0361.9.1	No miss exon.	3 primer extra: exon 4 to 4	4257c9d0-9821-48c3-8c0a-14dae21f875d
B0361.9_NP2	B0361.9	10.607	0.909173	9.39479	0.303058	449.604	37.3229	366.198	46.0834	0.0243597	0.025655	0.00657629	3'missing	B0361.9.1	5 primer miss: exon 1 to 2;3 primer miss: exon 2 to 3	No extra exon.	8bed815d-2f8f-4024-87c3-79bd98116933
B0361.9_NP3	B0361.9	9.32452	1.16557	7.92584	0.233113	449.604	37.3229	366.198	46.0834	0.0312293	0.0216436	0.00505851	3'missing	B0361.9.1	3 primer miss: exon 3 to 3	No extra exon.	c25a6796-f9d0-4815-a04e-9e871b4cc86f
B0361.9_NP4	B0361.9	51.1462	4.94964	42.0719	4.1247	449.604	37.3229	366.198	46.0834	0.132617	0.114888	0.0895051	5'missing	B0361.9.1	5 primer miss: exon 1 to 1	No extra exon.	c82f59d5-6cc7-4ff2-a613-7f2513657977
B0361.9_NP5	B0361.9	16.732	1.60885	14.8014	0.32177	449.604	37.3229	366.198	46.0834	0.0431063	0.0404192	0.00698235	5'missing	B0361.9.1	5 primer miss: exon 1 to 1	No extra exon.	e18c882e-fb4e-44f2-bb4e-616bc1eb51db
B0361.9_NP6	B0361.9	15.737	1.78155	13.3616	0.593849	449.604	37.3229	366.198	46.0834	0.0477334	0.0364874	0.0128864	Extra_UTR	B0361.9.1	No miss exon.	No extra exon.	ef0fff26-8ab7-4b86-a935-24615c32ec54
B0365.1_NP1	B0365.1	9.90389	1.37131	1.98078	6.5518	218.387	23.8048	43.3484	151.234	0.0576064	0.0456944	0.0433224	Intron_retention	B0365.1.1	Intron retention: intron 2 to 2	No extra exon.	01fa33bc-0147-4697-91f7-67badfbaea8a
B0365.1_NP1	B0365.1	13.7893	1.62227	2.4334	9.73361	218.387	23.8048	43.3484	151.234	0.0681489	0.0561359	0.0643614	Intron_retention	B0365.1.1	Intron retention: intron 4 to 4	No extra exon.	a376c74a-6d7c-454b-9884-7eab91812662
B0365.1_NP2	B0365.1	10.9147	1.36434	2.12231	7.42808	218.387	23.8048	43.3484	151.234	0.0573137	0.0489593	0.0491165	3'extra	B0365.1.1	No miss exon.	3 primer extra: exon 7 to 7	ad334f6c-4ae3-427e-a8d9-8f47b5b73486
B0365.1_NP3	B0365.1	66.637	7.59896	15.7824	43.2556	218.387	23.8048	43.3484	151.234	0.31922	0.364084	0.286018	5'missing	B0365.1.1	5 primer miss: exon 1 to 1	No extra exon.	b09b3b76-258a-4562-af7b-75d5025f5931
B0365.1_NP4	B0365.1	14.3263	1.89613	2.94953	9.48063	218.387	23.8048	43.3484	151.234	0.0796532	0.0680424	0.0626886	5'missing	B0365.1.1	5 primer miss: exon 1 to 1	No extra exon.	c19e2508-e331-463f-81f6-6b1a47c97c86
B0365.1_NP5	B0365.1	7.75938	0.816777	1.83775	5.10485	218.387	23.8048	43.3484	151.234	0.0343115	0.0423948	0.0337547	3'missing	B0365.1.1	3 primer miss: exon 6 to 6	No extra exon.	d46c13d2-b2d9-49e1-b4e1-22e9629f92fa
B0365.3_NP1	B0365.3	9.21472	3.52023	2.38133	3.31316	1386.04	555.394	375.905	454.737	0.00633825	0.00633492	0.00728588	New_junction	B0365.3.2	No miss exon.	Intron extra: intron 3 to 3	0282258d-dd4d-4073-92e2-f9c7fad98f37
B0365.3_NP1	B0365.3	12.4824	4.99297	3.17121	4.31824	1386.04	555.394	375.905	454.737	0.00898995	0.00843619	0.00949613	5'missing	B0365.3.2	5 primer miss: exon 1 to 2	No extra exon.	0ebdefb5-803b-4c81-9c34-7f51be5e69a3
B0365.3_NP2	B0365.3	11.2515	4.6029	2.72765	3.92099	1386.04	555.394	375.905	454.737	0.00828763	0.0072562	0.00862255	New_junction	NA	NA	NA	16815f78-74d6-4846-b3f2-e1ffbd5c2706
B0365.3_NP3	B0365.3	16.2326	6.52565	4.32324	5.38366	1386.04	555.394	375.905	454.737	0.0117496	0.0115009	0.0118391	3'missing	B0365.3.2	3 primer miss: exon 4 to 5	No extra exon.	1ab77f49-7f0f-4944-a1bb-5963dd71efe1
B0365.3_NP4	B0365.3	161.746	66.8717	44.7205	50.1538	1386.04	555.394	375.905	454.737	0.120404	0.118967	0.110292	5'missing	B0365.3.2	5 primer miss: exon 1 to 1	No extra exon.	27cfc4f0-7598-429c-8845-bfe05c9a2567
B0365.3_NP5	B0365.3	19.6541	8.24514	4.79368	6.61528	1386.04	555.394	375.905	454.737	0.0148456	0.0127524	0.0145475	3'missing	B0365.3.2	5 primer miss: exon 1 to 1;3 primer miss: exon 5 to 5	No extra exon.	61b4995b-40ad-433d-9b5a-eb4a9a5287a8
B0365.3_NP6	B0365.3	18.7027	7.29407	4.95623	6.45244	1386.04	555.394	375.905	454.737	0.0131331	0.0131848	0.0141894	5'missing	B0365.3.2	5 primer miss: exon 1 to 1	No extra exon.	6ae32df9-e6e3-444c-9afe-934d9fd68235
B0365.3_NP7	B0365.3	24.741	10.1557	6.37432	8.21098	1386.04	555.394	375.905	454.737	0.0182856	0.0169572	0.0180566	3'missing	B0365.3.2	5 primer miss: exon 1 to 1;3 primer miss: exon 5 to 5	No extra exon.	6bec2ad3-2aa3-4446-9256-5a605e4d7b8b
B0365.3_NP8	B0365.3	14.8068	6.18147	3.73764	4.88768	1386.04	555.394	375.905	454.737	0.0111299	0.00994302	0.0107484	3'extra	B0365.3.2	3 primer miss: exon 4 to 5	3 primer extra: exon 4 to 4	7107adf6-4f6a-44b2-9132-984faf09726a
B0365.3_NP9	B0365.3	17.3897	6.50841	4.06776	6.81349	1386.04	555.394	375.905	454.737	0.0117185	0.0108212	0.0149834	New_junction	B0365.3.2	No miss exon.	Intron extra: intron 2 to 2	710fe361-3f79-430d-b1b9-51ac679e3d02
B0365.3_NP10	B0365.3	5.4995	2.32306	1.37487	1.80156	1386.04	555.394	375.905	454.737	0.00418273	0.0036575	0.00396176	3'missing	B0365.3.2	5 primer miss: exon 1 to 1;3 primer miss: exon 5 to 5	No extra exon.	72e61fa4-4a19-46f5-a474-51e46dabd365
B0365.3_NP11	B0365.3	140.496	59.9957	37.2125	43.2881	1386.04	555.394	375.905	454.737	0.108024	0.0989945	0.0951936	Intron_retention	B0365.3.2	Intron retention: intron 3 to 3	No extra exon.	8321a3e1-9655-4f5d-b5c9-8d0cfca9447c
B0365.3_NP12	B0365.3	8.78841	3.36471	2.25988	3.16383	1386.04	555.394	375.905	454.737	0.00605823	0.00601182	0.00695749	3'extra	B0365.3.2	3 primer miss: exon 4 to 5	3 primer extra: exon 4 to 4	99f9a814-0034-4372-9cbf-8a00039d6015
B0365.3_NP13	B0365.3	16.1777	6.65687	4.2573	5.26357	1386.04	555.394	375.905	454.737	0.0119858	0.0113255	0.011575	Intron_retention	B0365.3.2	Intron retention: intron 3 to 3	Intron extra: intron 3 to 3	a9717141-f62d-4028-b548-e3813f539f09
B0365.3_NP14	B0365.3	19.5028	7.67924	4.9976	6.82599	1386.04	555.394	375.905	454.737	0.0138266	0.0132948	0.0150108	5'missing	B0365.3.2	5 primer miss: exon 1 to 2	No extra exon.	abce956d-b262-4db6-8847-12c70678a691
B0365.3_NP15	B0365.3	9.64365	3.7736	2.41091	3.45914	1386.04	555.394	375.905	454.737	0.00679446	0.00641362	0.0076069	5'missing	B0365.3.2	5 primer miss: exon 1 to 1	No extra exon.	c6e54869-cc74-46d9-8d56-4b4aac7f6475
B0365.3_NP16	B0365.3	9.48638	3.65676	2.43784	3.39178	1386.04	555.394	375.905	454.737	0.00658408	0.00648525	0.00745877	3'extra	B0365.3.2	5 primer miss: exon 1 to 4;3 primer miss: exon 2 to 5	5 primer extra: exon 1 to 1;3 primer extra: exon 2 to 2	d9a54b72-82a2-4e3e-8f40-1d147cd677e7
B0365.3_NP17	B0365.3	513.195	203.881	138.461	170.853	1386.04	555.394	375.905	454.737	0.367092	0.368341	0.375719	Extra_UTR	B0365.3.2	No miss exon.	No extra exon.	dbd06e36-8eb1-473a-b2b3-e680e88208e5
B0365.3_NP18	B0365.3	9.80825	3.84947	2.4257	3.53308	1386.04	555.394	375.905	454.737	0.00693107	0.00645294	0.0077695	5'missing	B0365.3.2	5 primer miss: exon 1 to 1	No extra exon.	dc9b0fba-a7e8-497c-9236-c04e9064b00d
B0365.3_NP19	B0365.3	11.9207	4.71862	3.10435	4.09775	1386.04	555.394	375.905	454.737	0.00849598	0.00825834	0.00901125	3'missing	B0365.3.2	3 primer miss: exon 4 to 5	No extra exon.	e6659df3-c611-4b01-b4e6-8c479e54e53d
B0365.3_NP20	B0365.3	9.28536	3.66256	2.32134	3.30146	1386.04	555.394	375.905	454.737	0.00659452	0.00617533	0.00726016	3'missing	B0365.3.2	3 primer miss: exon 5 to 5	No extra exon.	e81c0f65-1f8e-4c65-b919-1bbfd61112e3
B0365.3_NP21	B0365.3	5.17089	2.16237	1.31623	1.69229	1386.04	555.394	375.905	454.737	0.0038934	0.00350148	0.00372147	New_junction	NA	NA	NA	e8f0c141-aa26-4262-ab56-1477ca2fdcdb
B0365.3_NP22	B0365.3	8.40059	3.69877	2.00611	2.69571	1386.04	555.394	375.905	454.737	0.00665972	0.00533675	0.00592807	5'missing	B0365.3.2	5 primer miss: exon 1 to 1	No extra exon.	f15308d3-97d5-40a3-98ee-386559039a56
B0365.3_NP23	B0365.3	13.3955	5.05075	3.29397	5.05075	1386.04	555.394	375.905	454.737	0.00909399	0.00876276	0.011107	5'missing	B0365.3.2	5 primer miss: exon 1 to 1	No extra exon.	f208cc6c-0b4a-4a28-9811-4802ca3343d3
B0365.3_NP24	B0365.3	11.6558	4.56097	2.9773	4.11755	1386.04	555.394	375.905	454.737	0.00821214	0.00792035	0.00905479	5'missing	B0365.3.2	5 primer miss: exon 1 to 2	No extra exon.	fa5ad822-9251-4e2e-b664-cb0bded006bb
B0365.3_NP25	B0365.3	9.21472	3.52023	2.38133	3.31316	1386.04	555.394	375.905	454.737	0.00633825	0.00633492	0.00728588	Intron_retention	B0365.3.2	Intron retention: intron 3 to 3	Intron extra: intron 3 to 3	fe90ee7c-cbad-47d4-91d1-9771d9a6d667
B0365.6_NP1	B0365.6	43.5164	1.63187	8.15933	33.7252	118.697	3.75462	23.9915	90.9511	0.434629	0.340092	0.370806	Extra_UTR	B0365.6.1	No miss exon.	No extra exon.	572dffc4-2745-42ac-878b-77f7491034a6
B0365.6_NP1	B0365.6	9.99463	0	3.99785	5.99678	118.697	3.75462	23.9915	90.9511	0	0.166636	0.0659341	3'missing	B0365.6.1	5 primer miss: exon 1 to 2;3 primer miss: exon 2 to 3	No extra exon.	5a99d37d-0b58-4ec3-bb23-bf329d530899
B0365.9_NP1	B0365.9	12.8592	10.7925	1.37777	0.688885	132.606	112.607	13.6458	6.35301	0.0958425	0.100967	0.108434	Missing_UTR	B0365.9.1	No miss exon.	No extra exon.	122c258d-681e-4bde-9c1d-34cb1e5c258d
B0365.9_NP1	B0365.9	5.30162	4.54425	0.568031	0.189344	132.606	112.607	13.6458	6.35301	0.0403549	0.0416267	0.0298037	5'missing	B0365.9.1	5 primer miss: exon 1 to 1	No extra exon.	1b8c9d27-f902-48ff-81a0-a5389f921bb4
B0365.9_NP2	B0365.9	6.69626	5.15097	1.03019	0.515097	132.606	112.607	13.6458	6.35301	0.0457429	0.0754952	0.0810791	Intron_retention	B0365.9.1	Intron retention: intron 2 to 2	No extra exon.	724ab48c-369a-4557-92e4-65c67e6e5cc4
B0365.9_NP3	B0365.9	8.83007	7.35839	0.981118	0.490559	132.606	112.607	13.6458	6.35301	0.0653458	0.0718989	0.0772168	Missing_UTR	B0365.9.1	No miss exon.	No extra exon.	75221e99-8092-4238-933d-2201b305b61b
B0365.9_NP4	B0365.9	26.5592	22.9073	2.32393	1.32796	132.606	112.607	13.6458	6.35301	0.203427	0.170303	0.209028	Missing_UTR	B0365.9.1	No miss exon.	No extra exon.	7c8fd7ae-0c22-4c04-af79-1dc854cb8750
B0365.9_NP5	B0365.9	16.0654	13.6951	1.58021	0.790103	132.606	112.607	13.6458	6.35301	0.121619	0.115802	0.124367	Missing_UTR	B0365.9.1	No miss exon.	No extra exon.	a36a13ef-7a2a-4e5f-b453-040fb5d8d54d
B0365.9_NP6	B0365.9	39.3841	34.6234	3.46234	1.29838	132.606	112.607	13.6458	6.35301	0.307471	0.253729	0.204372	Missing_UTR	B0365.9.1	No miss exon.	No extra exon.	a6dcd80b-6f88-424a-9c02-d3ebc4e4a550
B0379.1_NP1	B0379.1	86.6791	3.46716	33.5159	49.696	214.929	12.3782	82.2017	120.349	0.280102	0.407728	0.412933	5'missing	B0379.1a.1	5 primer miss: exon 1 to 1	No extra exon.	16fe224b-2e22-448e-8677-0736c7a0d325
B0379.1_NP1	B0379.1	8.18145	1.25868	4.40539	2.51737	214.929	12.3782	82.2017	120.349	0.101685	0.0535925	0.0209172	3'missing	B0379.1a.1	3 primer miss: exon 6 to 6	No extra exon.	29ff6153-9870-4f47-bf24-6123c74f916d
B0379.1_NP2	B0379.1	81.5933	5.58859	20.1189	55.8859	214.929	12.3782	82.2017	120.349	0.451485	0.244751	0.464365	Missing_UTR	B0379.1a.1	No miss exon.	No extra exon.	4bc70a9a-8f36-48d2-8938-5f56a8d7082e
B0379.1_NP3	B0379.1	15.9207	1.32672	9.28705	5.30688	214.929	12.3782	82.2017	120.349	0.107182	0.112979	0.0440958	5'missing	B0379.1a.1	5 primer miss: exon 1 to 2	No extra exon.	a3c2ce88-e860-4bdb-8f39-6bd3e130f6d8
B0379.1_NP4	B0379.1	7.51809	0	6.26507	1.25301	214.929	12.3782	82.2017	120.349	0	0.0762159	0.0104115	5'missing	B0379.1a.1	5 primer miss: exon 1 to 1	No extra exon.	cc654346-9686-4c4e-b821-93a7e550b002
B0379.1_NP5	B0379.1	9.28705	0	7.59849	1.68855	214.929	12.3782	82.2017	120.349	0	0.0924372	0.0140305	3'missing	B0379.1a.1	5 primer miss: exon 1 to 1;3 primer miss: exon 6 to 6	No extra exon.	e28fbafb-4c70-4b8d-ab52-94903a54f92b
B0379.2_NP1	B0379.2	5.20264	0	1.89187	3.31077	51.5589	0	10.7715	40.7874	NA	0.175637	0.0811714	5'missing	B0379.2.1	5 primer miss: exon 1 to 3	No extra exon.	2d4980d8-92f9-478c-9f6f-07b70d16fba4
B0379.2_NP1	B0379.2	15.3742	0	2.56236	12.8118	51.5589	0	10.7715	40.7874	NA	0.237884	0.314112	Missing_UTR	B0379.2.1	No miss exon.	No extra exon.	68262d05-ad3e-4e5c-8d2c-80e40640a7fe
B0379.2_NP2	B0379.2	13.3841	0	2.32767	11.0564	51.5589	0	10.7715	40.7874	NA	0.216095	0.271074	Intron_retention	B0379.2.1	5 primer miss: exon 1 to 1;Intron retention: intron 3 to 3	No extra exon.	762f9f36-2c6f-4201-8b0c-1c9459a60f1e
B0379.2_NP3	B0379.2	10.7306	0	2.04393	8.68671	51.5589	0	10.7715	40.7874	NA	0.189754	0.212975	5'missing	B0379.2.1	5 primer miss: exon 1 to 1	No extra exon.	ad821775-5acf-43e2-9329-dee402d10783
B0379.3_NP1	B0379.3	6.68395	4.66322	0.932644	1.08809	121.483	81.1497	17.2429	23.0905	0.0574644	0.0540886	0.0471226	Intron_retention	B0379.3b.1	Intron retention: intron 9 to 10	No extra exon.	385b3e11-64f8-4f2f-8b0b-d3e442d90715
B0379.3_NP1	B0379.3	10.0008	6.95705	1.08704	1.95667	121.483	81.1497	17.2429	23.0905	0.085731	0.0630427	0.0847391	Intron_retention	B0379.3b.1	Intron retention: intron 2 to 2;Intron retention: intron 4 to 4	No extra exon.	39c946df-403d-4f12-86e4-1bddb5f3e058
B0379.3_NP2	B0379.3	10.0008	6.76974	1.69244	1.53858	121.483	81.1497	17.2429	23.0905	0.0834228	0.0981526	0.0666325	New_junction	NA	NA	NA	4ca2ab3b-3419-4965-a564-01e7088c553d
B0379.3_NP3	B0379.3	12.8805	8.58703	2.14676	2.14676	121.483	81.1497	17.2429	23.0905	0.105817	0.124501	0.0929714	Intron_retention	B0379.3b.1	Intron retention: intron 5 to 5	No extra exon.	6a315c50-f978-4443-86f3-95f2ded8a318
B0379.3_NP4	B0379.3	5.79947	4.05963	0.724934	1.01491	121.483	81.1497	17.2429	23.0905	0.0500264	0.0420425	0.0439534	Intron_retention	B0379.3b.1	Intron retention: intron 10 to 12	Intron extra: intron 10 to 10	8929904d-9b53-4f6e-a3c4-fec4623a4c3b
B0379.3_NP5	B0379.3	5.91525	3.9435	0.985876	0.985876	121.483	81.1497	17.2429	23.0905	0.0485954	0.0571757	0.0426962	5'missing	B0379.3b.1	5 primer miss: exon 1 to 3	No extra exon.	f7b7cfca-c383-43aa-aa99-e73e0faabbb2
B0379.4_NP1	B0379.4	7.42823	1.73325	2.22847	3.46651	121.654	23.8825	35.6681	62.1038	0.0725742	0.0624779	0.0558179	5'missing	B0379.4a.1	5 primer miss: exon 1 to 1	No extra exon.	06903897-62a5-4d8a-a44f-9636362bd7a1
B0379.4_NP1	B0379.4	13.1773	2.56226	5.12452	5.49056	121.654	23.8825	35.6681	62.1038	0.107286	0.143673	0.0884095	Extra_UTR	B0379.4b.1	No miss exon.	No extra exon.	35ba6fb7-6e04-4ea1-8dc7-2c1a58290361
B0379.4_NP2	B0379.4	41.0385	7.16545	13.0281	20.8449	121.654	23.8825	35.6681	62.1038	0.300029	0.365259	0.335647	Extra_UTR	B0379.4a.1	No miss exon.	No extra exon.	a6d47e4c-ad16-434a-af27-85592fcc5407
B0379.4_NP3	B0379.4	8.51171	1.32996	2.12793	5.05383	121.654	23.8825	35.6681	62.1038	0.0556875	0.0596592	0.0813772	5'missing	B0379.4c.1	5 primer miss: exon 1 to 2	No extra exon.	d5067da6-5027-4aa4-9883-5ef6b58e9da7
B0379.4_NP4	B0379.4	15.5722	4.12204	3.20603	8.24409	121.654	23.8825	35.6681	62.1038	0.172597	0.0898852	0.132747	Missing_UTR	B0379.4a.1	No miss exon.	No extra exon.	d89eb5f9-473f-4020-a62c-4e71eb8df9b6
B0379.4_NP5	B0379.4	7.18499	1.39064	2.08597	3.70838	121.654	23.8825	35.6681	62.1038	0.0582286	0.0584827	0.0597127	Extra_UTR	B0379.4c.1	No miss exon.	No extra exon.	f11049ad-1393-4a70-b253-e7e467a5b21d
B0379.7_NP1	B0379.7	46.4573	0	1.93572	44.5216	76.4855	0	4.30982	72.1756	NA	0.449143	0.616851	3'extra	B0379.7.1	No miss exon.	3 primer extra: exon 6 to 6	9c95754e-2e44-4140-a785-3070a8fc4c77
B0391.10_NP1	B0391.10	6.63361	1.32672	0	5.30688	6.63361	1.32672	0	5.30688	1	NA	1	3'extra	B0391.10	No miss exon.	3 primer extra: exon 3 to 8	5232b72d-2fb8-45c3-95f2-0d2a671d6699
B0393.1_NP1	B0393.1	23.3803	2.88304	8.76761	11.7296	22869.5	2767.49	8380.03	11721.9	0.00104175	0.00104625	0.00100066	3'extra	B0393.1.1	No miss exon.	3 primer extra: exon 5 to 5	00d3181f-6b03-4478-bc2f-8a8bb25c96b2
B0393.1_NP1	B0393.1	8.54476	1.17051	3.67542	3.69883	22869.5	2767.49	8380.03	11721.9	0.000422951	0.000438592	0.000315547	5'extra	B0393.1.1	5 primer miss: exon 1 to 1	5 primer extra: exon 1 to 1	06657049-51b7-43c0-b547-37e5dc0cdc6c
B0393.1_NP2	B0393.1	6.3304	1.06096	1.98046	3.28898	22869.5	2767.49	8380.03	11721.9	0.000383365	0.000236331	0.000280583	Missing_UTR	B0393.1.1	No miss exon.	No extra exon.	0ace937a-271f-479b-9b4f-063e858c303a
B0393.1_NP3	B0393.1	8.86363	1.17383	3.80897	3.88083	22869.5	2767.49	8380.03	11721.9	0.00042415	0.000454529	0.000331074	5'extra	B0393.1.1	No miss exon.	5 primer extra: exon 1 to 1	0e9ee8ba-09ad-4ed7-9680-160bf0134343
B0393.1_NP4	B0393.1	60.4928	8.84758	25.3082	26.337	22869.5	2767.49	8380.03	11721.9	0.00319696	0.00302006	0.00224681	5'missing	B0393.1.1	5 primer miss: exon 1 to 2	No extra exon.	0f05f564-90f7-4fd4-b963-7a4d6f6b8d0b
B0393.1_NP5	B0393.1	12.9955	1.93227	4.9254	6.13781	22869.5	2767.49	8380.03	11721.9	0.000698203	0.000587755	0.000523617	New_junction	NA	NA	NA	1000bc64-04b4-42cb-9c11-b892c3c405dd
B0393.1_NP6	B0393.1	9.95665	1.08682	3.92656	4.94326	22869.5	2767.49	8380.03	11721.9	0.000392708	0.000468562	0.000421711	3'extra	B0393.1.1	3 primer miss: exon 3 to 4	3 primer extra: exon 3 to 3	1013d1fd-3880-419b-aacf-2fe7312c1b59
B0393.1_NP7	B0393.1	34.4965	4.67341	12.5749	17.2483	22869.5	2767.49	8380.03	11721.9	0.00168868	0.00150058	0.00147145	Fusion_gene	B0393.8.1	No miss exon.	5 primer extra: exon 1 to 3	108f4b0f-d5a7-41cd-95f3-60769dee570d
B0393.1_NP8	B0393.1	11.4325	1.45362	4.47872	5.50018	22869.5	2767.49	8380.03	11721.9	0.000525247	0.000534451	0.000469221	New_junction	NA	NA	NA	11ce6189-0f29-470c-b865-99641a5e1944
B0393.1_NP9	B0393.1	11.6364	1.60652	5.64452	4.38536	22869.5	2767.49	8380.03	11721.9	0.000580495	0.000673568	0.000374116	5'missing	B0393.1.1	5 primer miss: exon 1 to 2	No extra exon.	13007d22-9787-4fbd-a7db-1d48078068fe
B0393.1_NP10	B0393.1	30.2707	4.94216	12.6643	12.6643	22869.5	2767.49	8380.03	11721.9	0.00178579	0.00151125	0.00108039	3'missing	B0393.1.1	3 primer miss: exon 4 to 4	No extra exon.	1411697e-0bce-4982-8cd4-3362d4651598
B0393.1_NP11	B0393.1	55.8583	8.07201	29.705	18.0813	22869.5	2767.49	8380.03	11721.9	0.00291672	0.00354474	0.00154252	5'missing	B0393.1.1	5 primer miss: exon 1 to 2	No extra exon.	196c1ef0-536c-4518-a307-41b237178c6f
B0393.1_NP12	B0393.1	5.98479	1.10168	2.17358	2.70953	22869.5	2767.49	8380.03	11721.9	0.000398077	0.000259376	0.00023115	3'extra	B0393.1.1	3 primer miss: exon 4 to 4	3 primer extra: exon 4 to 4	1970d6fa-25fb-4e94-8548-d294d05e699b
B0393.1_NP13	B0393.1	6.17554	0.977143	2.38423	2.81417	22869.5	2767.49	8380.03	11721.9	0.000353078	0.000284513	0.000240077	5'missing	B0393.1.1	5 primer miss: exon 1 to 2	No extra exon.	1996e446-e92b-47bd-8b13-5312b3a9a337
B0393.1_NP14	B0393.1	5.58299	0.961309	2.47722	2.14446	22869.5	2767.49	8380.03	11721.9	0.000347357	0.00029561	0.000182944	Missing_UTR	B0393.1.1	No miss exon.	No extra exon.	1bff03b1-c544-4115-a2c0-c2db5a1d4433
B0393.1_NP15	B0393.1	6.56222	0.972181	2.81238	2.77766	22869.5	2767.49	8380.03	11721.9	0.000351286	0.000335605	0.000236962	New_junction	NA	NA	NA	1db57ced-8cc5-4df5-a9c6-e1926f557352
B0393.1_NP16	B0393.1	11.5149	1.4559	4.79124	5.26772	22869.5	2767.49	8380.03	11721.9	0.000526072	0.000571745	0.00044939	3'extra	B0393.1.1	No miss exon.	3 primer extra: exon 5 to 5	1fe4eeac-3eed-40bb-86f5-83e866b6faa5
B0393.1_NP17	B0393.1	11.2988	2.65853	6.31401	2.32622	22869.5	2767.49	8380.03	11721.9	0.000960628	0.00075346	0.00019845	New_junction	NA	NA	NA	20609ddd-fa79-4b76-8c5a-6c8afe0b900c
B0393.1_NP18	B0393.1	85.2415	12.2273	40.874	32.1402	22869.5	2767.49	8380.03	11721.9	0.00441817	0.00487755	0.00274189	Missing_UTR	B0393.1.1	No miss exon.	No extra exon.	224892c8-56de-4724-8640-ce6e3bafaac8
B0393.1_NP19	B0393.1	10.0664	1.2583	3.88929	4.91881	22869.5	2767.49	8380.03	11721.9	0.000454672	0.000464115	0.000419625	New_junction	NA	NA	NA	2333ec99-2434-43ce-b57f-31e04f22df6a
B0393.1_NP20	B0393.1	108.852	14.6899	36.1372	58.0251	22869.5	2767.49	8380.03	11721.9	0.00530802	0.00431229	0.00495013	Intron_retention	B0393.1.1	Intron retention: intron 2 to 2	No extra exon.	245e95d4-7f91-43ab-aa4f-8dc5d6ad6229
B0393.1_NP21	B0393.1	9.62331	1.24172	3.91917	4.46242	22869.5	2767.49	8380.03	11721.9	0.000448679	0.00046768	0.00038069	5'missing	B0393.1.1	5 primer miss: exon 1 to 1	No extra exon.	25c05b7f-e02d-434a-b08d-8e437434e17a
B0393.1_NP22	B0393.1	12.8419	2.15055	5.59143	5.09988	22869.5	2767.49	8380.03	11721.9	0.000777075	0.000667233	0.000435071	3'missing	B0393.1.1	3 primer miss: exon 4 to 4	No extra exon.	2c753b9c-0633-4b4a-92c5-b2a7e53abf2a
B0393.1_NP23	B0393.1	7.28103	1.25535	2.57347	3.45221	22869.5	2767.49	8380.03	11721.9	0.000453605	0.000307095	0.000294509	5'missing	B0393.1.1	5 primer miss: exon 1 to 1	No extra exon.	2ce4a5da-83e6-484c-982d-56b6eb25e074
B0393.1_NP24	B0393.1	12.1972	1.7484	4.37101	6.07778	22869.5	2767.49	8380.03	11721.9	0.000631764	0.000521598	0.000518496	Missing_UTR	B0393.1.1	No miss exon.	No extra exon.	2f491e98-d2ab-4134-8d70-418f46776d53
B0393.1_NP25	B0393.1	13.2665	1.97834	5.06222	6.22595	22869.5	2767.49	8380.03	11721.9	0.000714849	0.000604082	0.000531137	New_junction	NA	NA	NA	3034ac9b-8e12-44ca-82b4-ea16d855be8e
B0393.1_NP26	B0393.1	9.23605	1.37033	4.111	3.75472	22869.5	2767.49	8380.03	11721.9	0.000495153	0.000490571	0.000320315	3'extra	B0393.1.1	No miss exon.	3 primer extra: exon 5 to 5	3272ce40-40d5-4197-a058-67f4d17b9cbe
B0393.1_NP27	B0393.1	19.7182	2.85893	7.3155	9.54379	22869.5	2767.49	8380.03	11721.9	0.00103304	0.000872969	0.000814182	5'extra	B0393.1.1	5 primer miss: exon 1 to 1	5 primer extra: exon 1 to 1	3573b19f-280e-4ef8-b424-fc9551d30af6
B0393.1_NP28	B0393.1	5.7294	0.836879	3.15439	1.73813	22869.5	2767.49	8380.03	11721.9	0.000302396	0.000376417	0.00014828	New_junction	NA	NA	NA	35e3b822-0d5d-4bf2-83e1-01f482345baa
B0393.1_NP29	B0393.1	1559.38	223.369	876.681	459.334	22869.5	2767.49	8380.03	11721.9	0.0807116	0.104616	0.0391858	Missing_UTR	B0393.1.1	No miss exon.	No extra exon.	3a6c19b7-af08-4720-94dc-9fe28d6bfac5
B0393.1_NP30	B0393.1	5.47105	0.639141	2.01969	2.81222	22869.5	2767.49	8380.03	11721.9	0.000230946	0.000241012	0.000239911	New_junction	NA	NA	NA	3b20689e-bf1f-408e-9462-cc94daf33b7b
B0393.1_NP31	B0393.1	54.9054	8.07098	18.9839	27.8506	22869.5	2767.49	8380.03	11721.9	0.00291635	0.00226537	0.00237594	Missing_UTR	B0393.1.1	No miss exon.	No extra exon.	3e0e584a-381f-42ac-a118-d00e1874ce9e
B0393.1_NP32	B0393.1	24.9037	3.69665	9.14434	12.0627	22869.5	2767.49	8380.03	11721.9	0.00133574	0.00109121	0.00102907	New_junction	NA	NA	NA	3f1931d3-2cc2-49a6-92a6-af588da5110e
B0393.1_NP33	B0393.1	4614.86	486.551	1557.43	2570.88	22869.5	2767.49	8380.03	11721.9	0.175809	0.18585	0.219322	Missing_UTR	B0393.1.1	No miss exon.	No extra exon.	3feaee36-0d5e-467b-84b2-5232def46cc0
B0393.1_NP34	B0393.1	7.31206	1.01691	3.0023	3.29285	22869.5	2767.49	8380.03	11721.9	0.000367447	0.000358269	0.000280913	Missing_UTR	B0393.1.1	No miss exon.	No extra exon.	421aac76-8750-469f-afac-05235436ac6b
B0393.1_NP35	B0393.1	10.4943	1.56702	4.70105	4.2262	22869.5	2767.49	8380.03	11721.9	0.000566222	0.000560983	0.000360537	3'missing	B0393.1.1	5 primer miss: exon 1 to 1;3 primer miss: exon 4 to 4	No extra exon.	43222fdb-e516-4fbf-bb4f-4c39b01d610b
B0393.1_NP36	B0393.1	39.0169	5.95679	14.5941	18.466	22869.5	2767.49	8380.03	11721.9	0.00215241	0.00174154	0.00157534	New_junction	NA	NA	NA	44f51ca2-8189-4f69-a964-2abab9d68423
B0393.1_NP37	B0393.1	11.9056	1.66477	4.54028	5.70057	22869.5	2767.49	8380.03	11721.9	0.000601544	0.000541797	0.000486317	3'extra	B0393.1.1	No miss exon.	3 primer extra: exon 5 to 5	48c8a168-778c-4c45-898e-1b5de9b5e6b9
B0393.1_NP38	B0393.1	18.1869	2.97604	11.5735	3.63738	22869.5	2767.49	8380.03	11721.9	0.00107536	0.00138108	0.000310306	New_junction	NA	NA	NA	49d1eaad-e2f9-4ed3-bd5c-f9d0b7c72675
B0393.1_NP39	B0393.1	13.6771	1.77834	5.07637	6.82238	22869.5	2767.49	8380.03	11721.9	0.000642583	0.000605769	0.000582018	New_junction	NA	NA	NA	49dadd79-9bd6-4eb3-bcaa-7e5da70dc7ed
B0393.1_NP40	B0393.1	29.4534	4.13621	10.5451	14.7722	22869.5	2767.49	8380.03	11721.9	0.00149457	0.00125836	0.00126022	5'extra	B0393.1.1	5 primer miss: exon 1 to 1	5 primer extra: exon 1 to 1	5048dd35-5951-4c95-af18-885301cfd7ed
B0393.1_NP41	B0393.1	40.3568	6.24388	18.2748	15.8381	22869.5	2767.49	8380.03	11721.9	0.00225615	0.00218075	0.00135115	3'missing	B0393.1.1	3 primer miss: exon 4 to 4	No extra exon.	55aec550-54e5-4d82-ac28-e527ff0c3a9a
B0393.1_NP42	B0393.1	8.73838	1.20631	4.06026	3.47181	22869.5	2767.49	8380.03	11721.9	0.000435885	0.000484516	0.000296181	Fusion_gene	B0393.1.1	No miss exon.	3 primer extra: exon 5 to 7	56647441-3088-495a-936d-e09552f6273f
B0393.1_NP43	B0393.1	453.369	80.2821	185.887	187.2	22869.5	2767.49	8380.03	11721.9	0.0290089	0.0221821	0.01597	Intron_retention	B0393.1.1	Intron retention: intron 2 to 2	No extra exon.	5a08f243-a4ee-45c9-8315-43cfe78cfbaa
B0393.1_NP44	B0393.1	6.59449	1.77544	3.55088	1.26817	22869.5	2767.49	8380.03	11721.9	0.000641534	0.000423731	0.000108188	3'extra	B0393.1.1	3 primer miss: exon 4 to 4	3 primer extra: exon 4 to 4	5a95dff0-6c91-46ba-8893-d748e275045f
B0393.1_NP45	B0393.1	8.38689	1.33125	3.63876	3.41688	22869.5	2767.49	8380.03	11721.9	0.000481032	0.000434218	0.000291495	3'missing	B0393.1.1	3 primer miss: exon 4 to 4	No extra exon.	5b7fa787-0b8f-41cf-a33f-97532eb18c27
B0393.1_NP46	B0393.1	28.4261	4.09164	12.921	11.4135	22869.5	2767.49	8380.03	11721.9	0.00147846	0.00154188	0.000973689	Missing_UTR	B0393.1.1	No miss exon.	No extra exon.	5e904329-7bf4-4673-a293-a81002f08932
B0393.1_NP47	B0393.1	27.8339	3.29809	10.4939	14.0419	22869.5	2767.49	8380.03	11721.9	0.00119173	0.00125226	0.00119791	3'missing	B0393.1.1	5 primer miss: exon 1 to 1;3 primer miss: exon 4 to 4	No extra exon.	5feca7b7-65d2-4072-83c8-7403fd22bf97
B0393.1_NP48	B0393.1	10.1748	1.43953	4.64574	4.08956	22869.5	2767.49	8380.03	11721.9	0.000520155	0.000554383	0.000348881	3'extra	B0393.1.1	No miss exon.	3 primer extra: exon 5 to 5	60fd3962-97e6-4e3b-9e1f-85b227fcc2be
B0393.1_NP49	B0393.1	8.46107	0.926211	3.22922	4.30563	22869.5	2767.49	8380.03	11721.9	0.000334675	0.000385347	0.000367314	5'extra	B0393.1.1	5 primer miss: exon 1 to 1	5 primer extra: exon 1 to 1	69d2e532-8ba0-43d4-b4c5-34057fb7c31d
B0393.1_NP50	B0393.1	6.39425	0.783609	2.91502	2.69561	22869.5	2767.49	8380.03	11721.9	0.000283147	0.000347854	0.000229963	5'extra	B0393.1.1	5 primer miss: exon 1 to 2	5 primer extra: exon 1 to 1	6a8d6f7c-f2b7-4f1a-bc41-cc2a4de4e60b
B0393.1_NP51	B0393.1	11.4126	1.45931	4.41535	5.53789	22869.5	2767.49	8380.03	11721.9	0.000527304	0.000526889	0.000472438	3'extra	B0393.1.1	3 primer miss: exon 3 to 4	3 primer extra: exon 3 to 3	7174e500-1ca1-4573-bbbe-f80cd920c10e
B0393.1_NP52	B0393.1	18.8069	2.84953	7.97868	7.97868	22869.5	2767.49	8380.03	11721.9	0.00102964	0.000952106	0.000680662	3'extra	B0393.1.1	No miss exon.	3 primer extra: exon 5 to 5	73d41be6-30c8-410c-9b43-404dce11f78d
B0393.1_NP53	B0393.1	14.9035	2.21378	5.45539	7.23432	22869.5	2767.49	8380.03	11721.9	0.000799923	0.000650999	0.000617161	New_junction	NA	NA	NA	777f3dd3-1667-4b2b-8323-79f6e45c9d90
B0393.1_NP54	B0393.1	22.5442	3.32714	7.85893	11.3582	22869.5	2767.49	8380.03	11721.9	0.00120222	0.000937816	0.000968966	Missing_UTR	B0393.1.1	No miss exon.	No extra exon.	7dbab2a5-36b0-4ebc-9983-fb4ff30d8c3c
B0393.1_NP55	B0393.1	571.517	78.2186	232.048	261.25	22869.5	2767.49	8380.03	11721.9	0.0282633	0.0276906	0.0222873	5'missing	B0393.1.1	5 primer miss: exon 1 to 1	No extra exon.	7f46fcf2-299a-476a-8872-d6b220b717aa
B0393.1_NP56	B0393.1	23.1327	3.94949	13.5411	5.64213	22869.5	2767.49	8380.03	11721.9	0.0014271	0.00161588	0.000481331	3'extra	B0393.1.1	3 primer miss: exon 3 to 4	3 primer extra: exon 3 to 3	81e2b840-cb47-4bc8-94c0-b044b11f1d16
B0393.1_NP57	B0393.1	1353.66	143.319	415.874	794.468	22869.5	2767.49	8380.03	11721.9	0.0517865	0.0496267	0.0677761	Extra_UTR	B0393.1.1	No miss exon.	No extra exon.	88dfa476-3614-4c14-90d2-472487695830
B0393.1_NP58	B0393.1	7.53921	1.07703	3.38495	3.07723	22869.5	2767.49	8380.03	11721.9	0.000389171	0.000403931	0.000262519	3'extra	B0393.1.1	No miss exon.	3 primer extra: exon 5 to 5	8916f3c8-123e-48f8-852e-3ba80b988b0d
B0393.1_NP59	B0393.1	5.82112	0.865301	3.02855	1.92726	22869.5	2767.49	8380.03	11721.9	0.000312666	0.000361401	0.000164415	Intron_retention	B0393.1.1	Intron retention: intron 2 to 2	No extra exon.	896024fc-da36-4f20-9fba-a2104cd5af92
B0393.1_NP60	B0393.1	30.1096	4.9863	12.4658	12.6575	22869.5	2767.49	8380.03	11721.9	0.00180174	0.00148755	0.00107982	5'missing	B0393.1.1	5 primer miss: exon 1 to 1	No extra exon.	8e6aaab9-3b97-424d-9e7e-c0a11d543a53
B0393.1_NP61	B0393.1	5.13012	0.751828	2.03436	2.34393	22869.5	2767.49	8380.03	11721.9	0.000271664	0.000242763	0.000199961	Missing_UTR	B0393.1.1	No miss exon.	No extra exon.	9106c222-3552-4d3f-aae0-a20a2541b991
B0393.1_NP62	B0393.1	6.49247	0.849482	2.60912	3.03387	22869.5	2767.49	8380.03	11721.9	0.00030695	0.00031135	0.00025882	5'extra	B0393.1.1	5 primer miss: exon 1 to 3	5 primer extra: exon 1 to 1	947579b4-852d-40b3-965e-352bbab5a214
B0393.1_NP63	B0393.1	9.38149	1.3966	4.09871	3.88618	22869.5	2767.49	8380.03	11721.9	0.000504643	0.000489104	0.000331531	5'extra	B0393.1.1	5 primer miss: exon 1 to 1	5 primer extra: exon 1 to 1	985d14b7-ec76-48a1-89b7-9a89a07213cc
B0393.1_NP64	B0393.1	23.6593	3.03447	8.53443	12.0904	22869.5	2767.49	8380.03	11721.9	0.00109647	0.00101843	0.00103144	New_junction	NA	NA	NA	9ac9c155-0af4-42b1-8f97-e54cac8c8b81
B0393.1_NP65	B0393.1	10.3121	1.46245	3.89986	4.94982	22869.5	2767.49	8380.03	11721.9	0.000528437	0.000465375	0.00042227	New_junction	NA	NA	NA	9c6db947-afbe-4f7b-81ce-8877ef91ec07
B0393.1_NP66	B0393.1	13.3905	1.5927	4.86658	6.93119	22869.5	2767.49	8380.03	11721.9	0.000575502	0.000580735	0.000591301	5'extra	B0393.1.1	5 primer miss: exon 1 to 1	5 primer extra: exon 1 to 1	9dceea0d-5efc-42aa-a4f9-5d77582162ef
B0393.1_NP67	B0393.1	32.5065	4.41614	11.8826	16.2077	22869.5	2767.49	8380.03	11721.9	0.00159572	0.00141797	0.00138268	3'extra	B0393.1.1	No miss exon.	3 primer extra: exon 5 to 5	9f2b1313-46e4-4cef-92f6-0822a2db5216
B0393.1_NP68	B0393.1	142.705	21.2317	67.5238	53.9494	22869.5	2767.49	8380.03	11721.9	0.00767182	0.0080577	0.00460243	5'missing	B0393.1.1	5 primer miss: exon 1 to 1	No extra exon.	a31db3a2-340a-47a6-b8f8-363b65d9d0a9
B0393.1_NP69	B0393.1	6.0099	0.858557	3.67953	1.47181	22869.5	2767.49	8380.03	11721.9	0.000310229	0.000439083	0.00012556	New_junction	NA	NA	NA	a8ae0264-4704-411c-8f2c-0dc5ae005f7e
B0393.1_NP70	B0393.1	8.24589	1.18551	3.60923	3.45116	22869.5	2767.49	8380.03	11721.9	0.00042837	0.000430694	0.000294419	5'missing	B0393.1.1	5 primer miss: exon 1 to 2	No extra exon.	abb59b1e-507e-44a1-8b6a-10c1f9cb8cd1
B0393.1_NP71	B0393.1	5.87233	0.815601	2.60992	2.4468	22869.5	2767.49	8380.03	11721.9	0.000294708	0.000311446	0.000208737	5'missing	B0393.1.1	5 primer miss: exon 1 to 1	No extra exon.	b1e91546-cee0-4523-b49d-af099682a426
B0393.1_NP72	B0393.1	8.14536	1.20885	3.7129	3.2236	22869.5	2767.49	8380.03	11721.9	0.000436804	0.000443065	0.000275006	3'missing	B0393.1.1	3 primer miss: exon 3 to 4	No extra exon.	b51172e2-8cf8-4b9d-9a6b-d1a5d8d28a7f
B0393.1_NP73	B0393.1	355.889	61.978	155.429	138.482	22869.5	2767.49	8380.03	11721.9	0.022395	0.0185476	0.0118139	3'extra	B0393.1.1	No miss exon.	3 primer extra: exon 5 to 5	b635d160-006f-4a0e-a61c-21f21e6cbaa6
B0393.1_NP74	B0393.1	146.34	17.4323	75.0048	53.9025	22869.5	2767.49	8380.03	11721.9	0.00629895	0.00895042	0.00459843	3'missing	B0393.1.1	3 primer miss: exon 4 to 4	No extra exon.	b9ac2938-9e3e-4a88-b040-d8c49953dc18
B0393.1_NP75	B0393.1	13.0969	1.44187	4.88632	6.76876	22869.5	2767.49	8380.03	11721.9	0.000521	0.000583091	0.000577444	Intron_retention	B0393.1.1	Intron retention: intron 2 to 2	No extra exon.	be2784c7-c18c-4737-8c70-8c0617542e34
B0393.1_NP76	B0393.1	20.6786	3.8519	9.32566	7.50107	22869.5	2767.49	8380.03	11721.9	0.00139184	0.00111284	0.000639917	Intron_retention	B0393.1.1	Intron retention: intron 2 to 2	No extra exon.	c2ca0572-2260-4669-af70-f933f2c5d361
B0393.1_NP77	B0393.1	101.495	13.6993	39.2981	48.4976	22869.5	2767.49	8380.03	11721.9	0.00495008	0.00468949	0.00413734	3'missing	B0393.1.1	3 primer miss: exon 3 to 4	No extra exon.	c41d2d05-2091-4db4-bf04-655c7b44d47f
B0393.1_NP78	B0393.1	26.35	3.50271	10.4285	12.4187	22869.5	2767.49	8380.03	11721.9	0.00126566	0.00124445	0.00105944	New_junction	NA	NA	NA	c89f7e2f-ec32-42ab-992f-92db336a63fd
B0393.1_NP79	B0393.1	27.4084	3.88465	9.92744	13.5963	22869.5	2767.49	8380.03	11721.9	0.00140367	0.00118465	0.0011599	5'extra	B0393.1.1	5 primer miss: exon 1 to 1	5 primer extra: exon 1 to 1	cbd5118c-1f66-41df-9e89-29d542d58d52
B0393.1_NP80	B0393.1	35.2061	6.33414	16.4982	12.3737	22869.5	2767.49	8380.03	11721.9	0.00228876	0.00196876	0.0010556	Intron_retention	B0393.1.1	Intron retention: intron 2 to 2	No extra exon.	cbdeb829-857d-4d8a-82f5-1e0efd11737a
B0393.1_NP81	B0393.1	10.5157	1.33077	4.22715	4.95777	22869.5	2767.49	8380.03	11721.9	0.000480857	0.000504432	0.000422948	5'extra	B0393.1.1	5 primer miss: exon 1 to 1	5 primer extra: exon 1 to 1	d34c065a-17f3-482f-9b22-32d9b490fa07
B0393.1_NP82	B0393.1	14.0995	1.74321	5.79361	6.56268	22869.5	2767.49	8380.03	11721.9	0.000629888	0.00069136	0.000559863	New_junction	NA	NA	NA	d40fba34-1d2f-40e9-8349-de3bd4c631d8
B0393.1_NP83	B0393.1	518.166	81.462	291.416	145.288	22869.5	2767.49	8380.03	11721.9	0.0294353	0.034775	0.0123945	Missing_UTR	B0393.1.1	No miss exon.	No extra exon.	d4d49ef2-30de-4bb1-bc83-8949cff7fe58
B0393.1_NP84	B0393.1	559.793	93.9951	238.33	227.468	22869.5	2767.49	8380.03	11721.9	0.033964	0.0284402	0.0194053	3'missing	B0393.1.1	3 primer miss: exon 4 to 4	No extra exon.	d5fbecdc-4f44-4e69-a070-7a52ba1f1e01
B0393.1_NP85	B0393.1	8.49833	0.894561	5.36736	2.2364	22869.5	2767.49	8380.03	11721.9	0.000323238	0.000640495	0.000190788	New_junction	NA	NA	NA	d6a2cc14-c275-4bfe-9d53-39e5dbc90bb7
B0393.1_NP86	B0393.1	39.9304	5.85852	16.0338	18.0381	22869.5	2767.49	8380.03	11721.9	0.0021169	0.00191334	0.00153883	New_junction	NA	NA	NA	dc7e349b-db95-4301-b51f-0dc2223512dc
B0393.1_NP87	B0393.1	7.03184	0.933237	2.99504	3.10356	22869.5	2767.49	8380.03	11721.9	0.000337214	0.000357402	0.000264765	New_junction	NA	NA	NA	ddf569cc-a731-4c43-9227-e5f10dab8cc7
B0393.1_NP88	B0393.1	7.51439	0.827856	2.83382	3.85272	22869.5	2767.49	8380.03	11721.9	0.000299136	0.000338163	0.000328676	New_junction	NA	NA	NA	dfbba23e-6510-4a9b-90ab-f1319bce3efa
B0393.1_NP89	B0393.1	9.92733	1.4641	3.6424	4.82082	22869.5	2767.49	8380.03	11721.9	0.000529035	0.000434653	0.000411265	Extra_UTR	B0393.1.1	No miss exon.	No extra exon.	e1d54f03-3fb9-4343-bcb0-18379aad3a44
B0393.1_NP90	B0393.1	10.9055	1.41742	4.13656	5.35149	22869.5	2767.49	8380.03	11721.9	0.000512168	0.000493621	0.000456536	5'extra	B0393.1.1	5 primer miss: exon 1 to 1	5 primer extra: exon 1 to 1	e4951989-f468-44f8-81f1-6d47c06f4241
B0393.1_NP91	B0393.1	380.423	71.5258	205.931	102.966	22869.5	2767.49	8380.03	11721.9	0.025845	0.0245741	0.00878402	Missing_UTR	B0393.1.1	No miss exon.	No extra exon.	e5fb4399-0748-4c17-9740-d75ee8600a04
B0393.1_NP92	B0393.1	7.98732	1.05277	3.38717	3.54738	22869.5	2767.49	8380.03	11721.9	0.000380406	0.000404196	0.000302627	5'extra	B0393.1.1	5 primer miss: exon 1 to 1	5 primer extra: exon 1 to 1	e790fc1e-fc82-4eca-87d9-0db257ef80e7
B0393.1_NP93	B0393.1	41.7877	6.51888	18.7209	16.5479	22869.5	2767.49	8380.03	11721.9	0.00235552	0.00223399	0.00141171	5'missing	B0393.1.1	5 primer miss: exon 1 to 1	No extra exon.	e850b2d8-635b-4814-82e9-efe74b7d5f3f
B0393.1_NP94	B0393.1	13.4533	1.81189	5.07329	6.5681	22869.5	2767.49	8380.03	11721.9	0.000654704	0.000605402	0.000560325	Intron_retention	B0393.1.1	Intron retention: intron 2 to 2	Intron extra: intron 2 to 2	e8c7b2b8-71b1-48c3-995c-e969788f8c27
B0393.1_NP95	B0393.1	7.4601	0.962594	3.85038	2.64713	22869.5	2767.49	8380.03	11721.9	0.000347821	0.00045947	0.000225827	3'missing	B0393.1.1	3 primer miss: exon 4 to 4	No extra exon.	e8d7d6d3-0147-47ac-9eb4-b30603e51887
B0393.1_NP96	B0393.1	30.0032	4.15793	10.9146	14.9307	22869.5	2767.49	8380.03	11721.9	0.00150242	0.00130245	0.00127374	New_junction	NA	NA	NA	efca7d10-f33a-4a53-8102-dd3a1e71a9fe
B0393.1_NP97	B0393.1	13.2109	2.00806	4.93208	6.27079	22869.5	2767.49	8380.03	11721.9	0.000725589	0.000588552	0.000534962	New_junction	B0393.1.1	No miss exon.	Intron extra: intron 2 to 2	f06814cc-7fb1-4d1b-8943-280f4dc2ce35
B0393.1_NP98	B0393.1	11.4967	1.72748	4.88459	4.88459	22869.5	2767.49	8380.03	11721.9	0.000624202	0.000582884	0.000416705	3'missing	B0393.1.1	3 primer miss: exon 4 to 4	No extra exon.	f4974ce2-e801-426c-bc60-645dbda8ae92
B0393.1_NP99	B0393.1	20.9887	3.56604	9.78113	7.64151	22869.5	2767.49	8380.03	11721.9	0.00128854	0.0011672	0.000651898	Missing_UTR	B0393.1.1	No miss exon.	No extra exon.	f63ae3a7-c669-4543-98c4-f1823a483b5b
B0393.1_NP100	B0393.1	70.1772	10.1744	38.0888	21.9141	22869.5	2767.49	8380.03	11721.9	0.00367639	0.00454518	0.00186949	5'missing	B0393.1.1	5 primer miss: exon 1 to 2	No extra exon.	f784213b-ad69-41ce-a57b-9546fe50840f
B0393.1_NP101	B0393.1	36.1101	4.81467	12.7479	18.5474	22869.5	2767.49	8380.03	11721.9	0.00173972	0.00152123	0.00158228	Missing_UTR	B0393.1.1	No miss exon.	No extra exon.	f816db38-cb0e-49f8-840d-055f28f13add
B0393.1_NP102	B0393.1	4279.77	440.874	1400.46	2438.44	22869.5	2767.49	8380.03	11721.9	0.159304	0.167118	0.208024	Extra_UTR	B0393.1.1	No miss exon.	No extra exon.	fc526437-0201-4f36-831c-97fcfe6c47c6
B0393.1_NP103	B0393.1	18.785	2.38884	7.22082	9.17533	22869.5	2767.49	8380.03	11721.9	0.000863179	0.00086167	0.000782748	New_junction	NA	NA	NA	fe935b8b-47a7-479f-a9f1-7b69665e5f48
B0393.1_NP104	B0393.1	8.34533	1.12702	3.51524	3.70307	22869.5	2767.49	8380.03	11721.9	0.000407236	0.000419478	0.00031591	New_junction	NA	NA	NA	ff1c5fe5-d103-4774-a430-d3a6ed27cd15
B0393.2_NP1	B0393.2	9.70209	3.66523	1.50921	4.52764	293.748	88.3725	34.794	170.582	0.0414748	0.0433757	0.0265424	Intron_retention	B0393.2.2	Intron retention: intron 3 to 3	No extra exon.	0bde4a4e-4de1-4100-97f9-6720218381b4
B0393.2_NP1	B0393.2	13.24	3.81923	1.78231	7.63847	293.748	88.3725	34.794	170.582	0.0432174	0.0512246	0.044779	Intron_retention	B0393.2.2	5 primer miss: exon 1 to 1;Intron retention: intron 3 to 3	No extra exon.	5b85b5b4-e220-4e88-8e14-38e808903167
B0393.2_NP2	B0393.2	6.94124	2.65835	1.0338	3.24909	293.748	88.3725	34.794	170.582	0.0300812	0.0297121	0.0190472	Extra_UTR	B0393.2.2	No miss exon.	No extra exon.	6e19e551-b89d-4506-85c3-33b53721cf65
B0393.2_NP3	B0393.2	61.6243	17.2548	5.34077	39.0287	293.748	88.3725	34.794	170.582	0.195251	0.153497	0.228798	Intron_retention	B0393.2.2	Intron retention: intron 4 to 4	No extra exon.	77539077-5115-479a-af6d-0e703be5cf81
B0393.2_NP4	B0393.2	74.8915	20.0021	6.97747	47.9119	293.748	88.3725	34.794	170.582	0.226338	0.200536	0.280874	Intron_retention	B0393.2.2	Intron retention: intron 6 to 6	No extra exon.	84dfcfa7-19ed-4d93-8e6b-b6bea95348ee
B0393.2_NP5	B0393.2	11.0541	3.08065	1.44972	6.52372	293.748	88.3725	34.794	170.582	0.0348598	0.0416656	0.038244	3'missing	B0393.2.2	3 primer miss: exon 9 to 9	No extra exon.	97db51dd-b8d9-492c-9b89-e98514e4316d
B0393.2_NP6	B0393.2	13.1295	3.78306	1.55773	7.78866	293.748	88.3725	34.794	170.582	0.0428081	0.0447701	0.0456594	Missing_UTR	B0393.2.1	No miss exon.	No extra exon.	b8a20fa6-c746-43d7-a5eb-5170627010ba
B0393.2_NP7	B0393.2	10.1495	3.38317	1.39307	5.37326	293.748	88.3725	34.794	170.582	0.038283	0.0400376	0.0314997	Intron_retention	B0393.2.2	5 primer miss: exon 1 to 2;Intron retention: intron 4 to 4	No extra exon.	da8015c1-57c6-4488-a589-cc661989b3e9
B0393.2_NP8	B0393.2	43.3376	14.6139	5.03926	23.6845	293.748	88.3725	34.794	170.582	0.165366	0.144831	0.138846	5'missing	B0393.2.2	5 primer miss: exon 1 to 1	No extra exon.	e512bec1-ba84-4dac-8ead-1d0bd6ebd20c
B0393.3_NP1	B0393.3	355.673	210.398	16.2808	128.994	449.758	275.485	20.6165	153.657	0.763738	0.7897	0.839495	Extra_UTR	B0393.3.1	No miss exon.	No extra exon.	27254fa1-ada7-4cb7-a896-f38ffb24c820
B0393.3_NP1	B0393.3	12.3843	9.28823	0	3.09608	449.758	275.485	20.6165	153.657	0.0337159	0	0.0201493	5'missing	B0393.3.1	5 primer miss: exon 1 to 1	No extra exon.	3542ad5c-4988-40a3-b956-849651d1c68a
B0393.3_NP2	B0393.3	5.2516	3.50107	0	1.75053	449.758	275.485	20.6165	153.657	0.0127087	0	0.0113925	Intron_retention	B0393.3.1	Intron retention: intron 3 to 3	No extra exon.	8aa00df0-c4b6-43ed-a18c-3d617362c84d
B0393.3_NP3	B0393.3	6.79945	4.53296	0	2.26648	449.758	275.485	20.6165	153.657	0.0164545	0	0.0147503	3'missing	B0393.3.1	3 primer miss: exon 5 to 5	No extra exon.	8e546dc5-626a-4b09-a517-b137a5a5f2c5
B0393.3_NP4	B0393.3	60.6991	41.1887	4.33565	15.1748	449.758	275.485	20.6165	153.657	0.149513	0.2103	0.0987575	New_junction	NA	NA	NA	b4511eda-2af9-40e9-add6-9222b9e4ab55
B0393.4_NP1	B0393.4	5.74912	0	0	5.74912	6.19136	0	0	6.19136	NA	NA	0.928571	3'missing	B0393.4.1	3 primer miss: exon 6 to 9	No extra exon.	f6559658-53e4-4e2c-a6cd-f68f60b5dda8
B0393.5_NP1	B0393.5	5.97024	5.22396	0.746281	0	14.5939	13.0369	1.55705	0	0.400707	0.47929	NA	Intron_retention	B0393.5.1	5 primer miss: exon 1 to 1;Intron retention: intron 9 to 9	No extra exon.	329b2e40-97df-4bc8-a09f-ee3d677e23f7
B0393.5_NP1	B0393.5	7.29697	6.48619	0.810774	0	14.5939	13.0369	1.55705	0	0.497527	0.52071	NA	Intron_retention	B0393.5.1	5 primer miss: exon 1 to 1;Intron retention: intron 9 to 9;3 primer miss: exon 16 to 16	No extra exon.	6cf6ef28-df55-4b62-920f-ff9d35e6644d
B0393.6_NP1	B0393.6	12.9871	5.37398	1.3435	6.26965	124.152	41.3082	8.59119	74.2522	0.130095	0.156381	0.0844371	Intron_retention	B0393.6.1	Intron retention: intron 4 to 4	No extra exon.	321b2c9d-48fb-4846-9141-e3cf6377cc1b
B0393.6_NP1	B0393.6	27.4263	8.94335	2.98112	15.5018	124.152	41.3082	8.59119	74.2522	0.216503	0.346997	0.208772	Intron_retention	B0393.6.1	Intron retention: intron 2 to 2	No extra exon.	8420fca2-4553-46f1-8e8e-21ffd2aabaf5
B0393.6_NP2	B0393.6	29.9028	11.0751	2.21502	16.6127	124.152	41.3082	8.59119	74.2522	0.26811	0.257825	0.223733	5'missing	B0393.6.1	5 primer miss: exon 1 to 1	No extra exon.	f3ae5b9f-a35a-457e-9cd7-669d38f48699
B0393.9_NP1	B0393.9	12.9805	0.519222	6.23066	6.23066	104.633	3.86386	46.7302	54.0392	0.134379	0.133333	0.115299	3'missing	B0393.9a.1	3 primer miss: exon 5 to 5	No extra exon.	03f1329e-e550-4e5c-a62a-d8cba1244d05
B0393.9_NP1	B0393.9	5.76097	0	1.04745	4.71352	104.633	3.86386	46.7302	54.0392	0	0.0224148	0.0872241	3'missing	B0393.9b.1	3 primer miss: exon 6 to 6	No extra exon.	472bb308-3b80-41a5-a251-8338b82d9f54
B0393.9_NP2	B0393.9	35.5901	1.11219	14.4585	20.0194	104.633	3.86386	46.7302	54.0392	0.287844	0.309403	0.370461	Missing_UTR	B0393.9b.1	No miss exon.	No extra exon.	5ded1e83-69a1-40ca-bf99-d36c5eb26a1c
B0393.9_NP3	B0393.9	8.61342	0.506672	5.57339	2.53336	104.633	3.86386	46.7302	54.0392	0.131131	0.119267	0.04688	Intron_retention	B0393.9b.1	Intron retention: intron 2 to 2	No extra exon.	d406fae1-471c-41f2-b998-0f356c9a623b
B0393.9_NP4	B0393.9	11.9302	1.03741	7.26187	3.63094	104.633	3.86386	46.7302	54.0392	0.268491	0.1554	0.0671908	Extra_UTR	B0393.9a.1	No miss exon.	No extra exon.	ea5ad54a-ddd7-454d-9347-50dc4d214d57
B0395.1_NP1	B0395.1	8.62369	2.46391	1.23196	4.92782	10.6138	2.46391	1.89532	6.25454	1	0.65	0.787879	5'missing	B0395.1.1	5 primer miss: exon 1 to 1	No extra exon.	6a8d814c-5313-48a4-b12e-5df238ba6eb0
B0395.2_NP1	B0395.2	38.6076	34.9307	3.67691	0	56.253	51.9127	4.34027	0	0.672873	0.847162	NA	Extra_UTR	B0395.2.1	No miss exon.	No extra exon.	9e1087b5-1b24-4c3e-8258-f0be305f0674
B0395.3_NP1	B0395.3	61.0549	34.4246	13.6399	12.9904	151.176	77.7445	38.5017	34.93	0.442791	0.354268	0.371898	Extra_UTR	B0395.3.2	No miss exon.	No extra exon.	069f80d4-d15d-426c-93f1-b3b073b9744a
B0395.3_NP1	B0395.3	7.9197	3.95985	2.07421	1.88564	151.176	77.7445	38.5017	34.93	0.0509341	0.0538731	0.0539834	Extra_UTR	B0395.3.1	No miss exon.	No extra exon.	b19c29cd-9a90-4d2b-b5cf-29b7edd43fc8
B0395.3_NP2	B0395.3	8.36194	4.18097	2.42056	1.76041	151.176	77.7445	38.5017	34.93	0.0537783	0.0628689	0.0503981	Extra_UTR	B0395.3.1	No miss exon.	No extra exon.	b3231a61-2c94-4da5-a000-f8ea1c674541
B0395.3_NP3	B0395.3	15.3272	7.97016	4.29162	3.06544	151.176	77.7445	38.5017	34.93	0.102517	0.111466	0.0877596	5'missing	B0395.3.2	5 primer miss: exon 1 to 2	No extra exon.	dd284b82-ba25-4330-a286-ef59da5f41ed
B0395.3_NP4	B0395.3	15.9906	9.25771	3.64697	3.0859	151.176	77.7445	38.5017	34.93	0.119079	0.0947224	0.0883453	5'missing	B0395.3.2	5 primer miss: exon 1 to 1	No extra exon.	fed65670-42f3-4bb7-8b46-d891ca3ed5ca
B0403.4_NP1	B0403.4	67.0304	45.254	8.16614	13.6102	1703.22	1093.55	222.09	387.582	0.0413826	0.0367694	0.0351158	3'missing	B0403.4.1	3 primer miss: exon 4 to 4	No extra exon.	0f97bf52-df29-4cef-984e-fd3801f3b80a
B0403.4_NP1	B0403.4	23.912	17.3905	2.76667	3.75477	1703.22	1093.55	222.09	387.582	0.0159028	0.0124574	0.00968769	New_junction	NA	NA	NA	2d5cb7f3-9104-4193-9800-36ff44e579c1
B0403.4_NP2	B0403.4	5.4021	4.2562	0.4911	0.654799	1703.22	1093.55	222.09	387.582	0.00389209	0.00221126	0.00168945	5'extra	B0403.4.1	5 primer miss: exon 1 to 1	5 primer extra: exon 1 to 1	66e5ec0f-8d2a-43ab-aeda-be4034542663
B0403.4_NP3	B0403.4	12.3553	7.69966	1.96968	2.68593	1703.22	1093.55	222.09	387.582	0.00704097	0.00886882	0.00692997	5'missing	B0403.4.1	5 primer miss: exon 1 to 1	No extra exon.	87fae46f-91aa-4502-a39c-5fcb78dc59e0
B0403.4_NP4	B0403.4	399.595	281.801	53.4606	64.3339	1703.22	1093.55	222.09	387.582	0.257693	0.240715	0.165988	5'missing	B0403.4.1	5 primer miss: exon 1 to 1	No extra exon.	acfe9f27-537c-45d0-a77b-31a4228b666d
B0403.4_NP5	B0403.4	13.6157	8.76624	2.05167	2.79774	1703.22	1093.55	222.09	387.582	0.00801631	0.00923801	0.00721845	Missing_UTR	B0403.4.1	No miss exon.	No extra exon.	b757e70b-236d-4858-9e6e-a51120e73353
B0403.4_NP6	B0403.4	35.3376	25.0948	3.84104	6.40173	1703.22	1093.55	222.09	387.582	0.022948	0.0172949	0.0165171	5'missing	B0403.4.1	5 primer miss: exon 1 to 2	No extra exon.	e1202c98-1403-4a5d-b280-f112d5bdedb7
B0403.4_NP7	B0403.4	15.2088	12.0621	1.74814	1.39851	1703.22	1093.55	222.09	387.582	0.0110302	0.00787127	0.00360829	5'extra	B0403.4.1	5 primer miss: exon 1 to 2	5 primer extra: exon 1 to 1	e7edce54-7222-408b-b13b-83bb7f2911b8
B0403.4_NP8	B0403.4	1116.69	682.42	144.38	289.888	1703.22	1093.55	222.09	387.582	0.624041	0.650095	0.747939	Extra_UTR	B0403.4.1	No miss exon.	No extra exon.	eb5716f1-90b2-4f40-93e7-ee9ae7ea8b46
B0403.5_NP1	B0403.5	5.08576	3.81432	0.63572	0.63572	39.8016	24.0904	9.77872	5.9325	0.158334	0.0650106	0.107159	Intron_retention	B0403.5.1	Intron retention: intron 5 to 5	No extra exon.	13dc7ce8-d457-4dff-8a9d-358d53d1c29a
B0403.5_NP1	B0403.5	19.6797	11.0206	5.51031	3.14875	39.8016	24.0904	9.77872	5.9325	0.45747	0.5635	0.530763	Extra_UTR	B0403.5.1	No miss exon.	No extra exon.	4f1a228f-6eca-4f9d-8d5c-6f0b9f55394e
B0403.5_NP2	B0403.5	5.74912	3.28521	1.64261	0.821303	39.8016	24.0904	9.77872	5.9325	0.13637	0.167978	0.138441	Intron_retention	B0403.5.1	Intron retention: intron 3 to 3	No extra exon.	753598f9-c6ea-4070-8a1b-e58b0638b5bc
B0403.6_NP1	B0403.6	5.30688	0	2.65344	2.65344	11.9405	0	6.25454	5.68595	NA	0.424242	0.466667	Extra_UTR	B0403.6.1	No miss exon.	No extra exon.	20ae52e5-bfdd-4b1d-8ee9-fefb0a9bb147
B0410.2_NP1	B0410.2	8.95537	8.95537	0	0	81.2617	72.4174	0	8.84421	0.123663	NA	0	3'missing	B0410.2a.1	5 primer miss: exon 1 to 5;3 primer miss: exon 8 to 8	No extra exon.	384ce9f9-e07c-48af-bb06-a604740322a4
B0410.2_NP1	B0410.2	19.7903	16.0796	0	3.71067	81.2617	72.4174	0	8.84421	0.22204	NA	0.419559	Intron_retention	B0410.2a.1	Intron retention: intron 3 to 3	No extra exon.	6a6e9f1e-2471-4f11-83f0-912d42cb5d3c
B0410.2_NP2	B0410.2	14.0411	14.0411	0	0	81.2617	72.4174	0	8.84421	0.193892	NA	0	3'extra	B0410.2a.1	No miss exon.	3 primer extra: exon 9 to 9	7030da37-07ff-4343-8020-415847b4cbec
B0410.2_NP3	B0410.2	5.19632	5.19632	0	0	81.2617	72.4174	0	8.84421	0.0717551	NA	0	Missing_UTR	B0410.2a.1	No miss exon.	No extra exon.	c1c030fa-507a-413f-b219-c68a2c683e8f
B0410.2_NP4	B0410.2	21.7803	18.5773	0	3.20299	81.2617	72.4174	0	8.84421	0.256531	NA	0.362157	Extra_UTR	B0410.2a.1	No miss exon.	No extra exon.	c58e88f0-579a-482f-a38e-0971ff31ec12
B0410.3_NP1	B0410.3	5.42271	0.813406	1.62681	2.98249	250.75	30.9588	127.293	92.4989	0.0262738	0.0127801	0.0322435	Extra_UTR	B0410.3.1	No miss exon.	No extra exon.	907e22ef-4bc0-45b1-bd4e-81a536fa0a6e
B0410.3_NP1	B0410.3	97.6298	11.4341	55.4115	30.7842	250.75	30.9588	127.293	92.4989	0.369333	0.435308	0.332806	Missing_UTR	B0410.3.1	No miss exon.	No extra exon.	df381dd9-ea15-4a90-8310-ce1cc8eb4d6a
B0410.3_NP2	B0410.3	62.4717	6.46259	30.6973	25.3118	250.75	30.9588	127.293	92.4989	0.208748	0.241156	0.273645	Extra_UTR	B0410.3.1	No miss exon.	No extra exon.	e01d3676-f00b-4737-9e00-3522ea49daad
B0410.3_NP3	B0410.3	8.18671	1.51606	2.42569	4.24496	250.75	30.9588	127.293	92.4989	0.0489701	0.019056	0.045892	3'missing	B0410.3.1	5 primer miss: exon 1 to 1;3 primer miss: exon 2 to 2	No extra exon.	e9125aca-bde6-4b17-9b5d-f14a140a0cab
B0410.3_NP4	B0410.3	9.81194	1.54925	3.09851	5.16418	250.75	30.9588	127.293	92.4989	0.0500424	0.0243416	0.0558297	3'missing	B0410.3.1	5 primer miss: exon 1 to 1;3 primer miss: exon 2 to 2	No extra exon.	fec3d511-369b-4125-bc4c-5ae0a6cd3bf3
B0412.2_NP1	B0412.2	9.79246	0	9.79246	0	39.9596	0	36.2689	3.59593	NA	0.269996	0	5'missing	B0412.2.1	5 primer miss: exon 1 to 1	No extra exon.	374618be-da3b-4a04-86e1-f67147a7bcba
B0412.2_NP1	B0412.2	13.1851	0	9.58915	3.59593	39.9596	0	36.2689	3.59593	NA	0.264391	1	Missing_UTR	B0412.2.1	No miss exon.	No extra exon.	785b41a9-dac5-456e-ba97-c498d14f64e4
B0412.3_NP1	B0412.3	5.3811	2.69055	1.41608	1.27447	181.515	72.1392	54.3727	55.0032	0.0372967	0.026044	0.0231709	Extra_UTR	B0412.3b.1	No miss exon.	No extra exon.	25ac216e-500e-46d2-886e-5dcecc3f808e
B0412.3_NP1	B0412.3	28.4218	13.1583	9.47394	5.78963	181.515	72.1392	54.3727	55.0032	0.182401	0.174241	0.10526	3'missing	B0412.3a.1	5 primer miss: exon 1 to 1;3 primer miss: exon 17 to 17	No extra exon.	3a4dc16b-acf4-4972-8238-c27e0a33559a
B0412.3_NP2	B0412.3	81.0484	27.0161	23.0432	30.9891	181.515	72.1392	54.3727	55.0032	0.3745	0.423801	0.563405	5'missing	B0412.3a.1	5 primer miss: exon 1 to 2	No extra exon.	5052d16e-b698-4179-bd9b-4dfc1ebabd7b
B0412.3_NP3	B0412.3	7.02845	3.51423	1.95235	1.56188	181.515	72.1392	54.3727	55.0032	0.0487145	0.0359068	0.0283961	3'missing	B0412.3a.1	3 primer miss: exon 9 to 17	No extra exon.	6a281015-ac0a-4a6e-acd7-3663d8cb9873
B0412.3_NP4	B0412.3	6.44248	3.22124	1.86493	1.35631	181.515	72.1392	54.3727	55.0032	0.0446531	0.034299	0.0246588	5'missing	B0412.3b.1	5 primer miss: exon 1 to 1	No extra exon.	8a390ff0-adcf-4f3c-9fac-f9069ae015b1
B0412.3_NP5	B0412.3	6.32087	3.40354	1.45866	1.45866	181.515	72.1392	54.3727	55.0032	0.0471802	0.0268271	0.0265196	New_junction	NA	NA	NA	c8750320-fbb7-47a8-9d17-8ffcc164106d
B0412.4_NP1	B0412.4	71.2449	10.822	34.2697	26.1532	3019.62	430.163	914.656	1674.8	0.0251579	0.0374673	0.0156157	3'missing	B0412.4.1	3 primer miss: exon 3 to 3	No extra exon.	0e77b812-1a30-41f9-9d6c-f93a17569d7f
B0412.4_NP1	B0412.4	1019.61	126.697	329.143	563.767	3019.62	430.163	914.656	1674.8	0.294532	0.359855	0.336618	Extra_UTR	B0412.4.1	No miss exon.	No extra exon.	0ec9083c-a25d-47c1-a037-8681b3bae8a2
B0412.4_NP2	B0412.4	1600.05	253.057	445.031	901.96	3019.62	430.163	914.656	1674.8	0.588281	0.486555	0.538549	Extra_UTR	B0412.4.1	No miss exon.	No extra exon.	47ada239-a060-424d-9892-8c823446daae
B0412.4_NP3	B0412.4	5.12999	0.427499	2.56499	2.13749	3019.62	430.163	914.656	1674.8	0.000993807	0.00280432	0.00127627	Extra_UTR	B0412.4.1	5 primer miss: exon 1 to 2;3 primer miss: exon 2 to 3	No extra exon.	481a059d-eaba-48de-896c-282ac1452768
B0412.4_NP4	B0412.4	5.77124	0	3.94874	1.8225	3019.62	430.163	914.656	1674.8	0	0.00431718	0.00108819	3'extra	B0412.4.1	No miss exon.	3 primer extra: exon 4 to 4	7498c45f-3813-4722-af76-74223a544d09
B0412.4_NP5	B0412.4	112.572	14.5255	45.392	52.6548	3019.62	430.163	914.656	1674.8	0.0337673	0.0496274	0.0314395	3'missing	B0412.4.1	3 primer miss: exon 3 to 3	No extra exon.	8affee87-448b-41aa-bafc-923a1c3cba9b
B0412.4_NP6	B0412.4	202.148	24.6345	52.8918	124.622	3019.62	430.163	914.656	1674.8	0.0572679	0.0578269	0.07441	Extra_UTR	B0412.4.1	No miss exon.	No extra exon.	98afc2e1-3a7b-4a6c-81e1-fec8568124ad
B0414.3_NP1	B0414.3	11.4503	4.75294	0.648128	6.0492	198.548	91.6746	11.2737	95.5993	0.0518458	0.0574905	0.0632766	5'extra	B0414.3.1	No miss exon.	5 primer extra: exon 1 to 1	0593401b-d2fa-4af9-8081-be887d6f9fb6
B0414.3_NP1	B0414.3	12.1968	6.26324	0.988933	4.94467	198.548	91.6746	11.2737	95.5993	0.0683204	0.0877207	0.0517228	3'extra	B0414.3.1	No miss exon.	3 primer extra: exon 3 to 3	28b158ef-9197-4361-b9a4-f2398196a35a
B0414.3_NP2	B0414.3	5.44004	3.95639	0	1.48365	198.548	91.6746	11.2737	95.5993	0.0431569	0	0.0155194	Missing_UTR	B0414.3.1	No miss exon.	No extra exon.	515418e7-1359-4d31-8e55-978e83018cde
B0414.3_NP3	B0414.3	25.0365	12.9707	1.50822	10.5576	198.548	91.6746	11.2737	95.5993	0.141487	0.133783	0.110436	Missing_UTR	B0414.3.1	No miss exon.	No extra exon.	5986278f-3b11-48ba-8cee-57acb59f28d8
B0414.3_NP4	B0414.3	7.98244	4.62141	0.840257	2.52077	198.548	91.6746	11.2737	95.5993	0.050411	0.0745327	0.0263681	3'extra	B0414.3.1	No miss exon.	3 primer extra: exon 3 to 3	5a04d593-6aec-4e2c-945a-747d05b0857d
B0414.3_NP5	B0414.3	11.3214	4.17102	1.19172	5.95861	198.548	91.6746	11.2737	95.5993	0.0454981	0.105708	0.062329	Missing_UTR	B0414.3.1	No miss exon.	No extra exon.	73c0c8e7-fc50-4871-9c16-cce5fb8d0510
B0414.3_NP6	B0414.3	20.6141	10.5713	1.05713	8.98564	198.548	91.6746	11.2737	95.5993	0.115314	0.0937703	0.0939928	Missing_UTR	B0414.3.1	No miss exon.	No extra exon.	8f5a8470-9b42-425a-acf6-066902c31119
B0414.3_NP7	B0414.3	5.9886	2.62914	0.292127	3.06733	198.548	91.6746	11.2737	95.5993	0.028679	0.0259123	0.0320853	Missing_UTR	B0414.3.1	No miss exon.	No extra exon.	a39fd826-8bee-4865-bff0-d165f67c9556
B0414.3_NP8	B0414.3	21.0564	11.0823	1.10823	8.86583	198.548	91.6746	11.2737	95.5993	0.120887	0.0983025	0.0927396	3'extra	B0414.3.1	5 primer miss: exon 1 to 1;3 primer miss: exon 2 to 2	5 primer extra: exon 1 to 1;3 primer extra: exon 2 to 2	af725b89-8336-4770-938e-ade956f3699d
B0414.3_NP9	B0414.3	7.29697	2.43232	0	4.86464	198.548	91.6746	11.2737	95.5993	0.0265321	0	0.0508858	Missing_UTR	B0414.3.1	No miss exon.	No extra exon.	b0e5e1db-9c3e-42f7-86cb-2f3ceb53e68a
B0414.3_NP10	B0414.3	50.8097	18.1104	3.0184	29.6809	198.548	91.6746	11.2737	95.5993	0.197551	0.267739	0.310472	Extra_UTR	B0414.3.1	No miss exon.	No extra exon.	d97e29f6-a689-495d-9e03-eac7b4828598
B0414.3_NP11	B0414.3	6.24131	3.33837	0.145147	2.75779	198.548	91.6746	11.2737	95.5993	0.0364155	0.0128748	0.0288474	3'extra	B0414.3.1	5 primer miss: exon 1 to 1;3 primer miss: exon 2 to 2	5 primer extra: exon 1 to 1;3 primer extra: exon 2 to 2	eb4637be-38cd-479e-938a-d267ed6a801c
B0414.5_NP1	B0414.5	15.4784	4.26991	1.06748	10.141	234.94	65.2136	17.2859	152.441	0.0654757	0.0617542	0.0665244	3'extra	B0414.5.1	5 primer miss: exon 1 to 5;3 primer miss: exon 2 to 6	5 primer extra: exon 1 to 1;3 primer extra: exon 2 to 2	688589a8-2abe-4ad6-96e5-6a8acb0f8206
B0414.5_NP1	B0414.5	150.693	42.5487	11.5236	96.6211	234.94	65.2136	17.2859	152.441	0.652452	0.666649	0.633827	Extra_UTR	B0414.5.1	No miss exon.	No extra exon.	d4d32c37-66f7-4200-848d-6abe0d0c83c6
B0414.5_NP2	B0414.5	16.0312	5.34374	0	10.6875	234.94	65.2136	17.2859	152.441	0.0819421	0	0.0701091	Intron_retention	B0414.5.1	Intron retention: intron 2 to 2	No extra exon.	f76e22f6-b7c1-4945-955e-522e0e7f23b4
B0414.6_NP1	B0414.6	6.65572	3.07187	0	3.58385	39.3373	18.3387	2.92861	18.0699	0.167507	0	0.198332	3'missing	B0414.6.1	3 primer miss: exon 6 to 6	No extra exon.	7e4fb1d7-70d2-4126-ada5-bbae9b9bc240
B0414.7_NP1	B0414.7	15.4056	6.93253	5.1994	3.2737	177.468	88.4512	50.8011	38.2157	0.078377	0.102348	0.0856636	5'missing	B0414.7a.1	5 primer miss: exon 1 to 2	No extra exon.	251fcdae-3629-4376-974b-3e102453bd22
B0414.7_NP1	B0414.7	9.11318	4.35256	2.99239	1.76823	177.468	88.4512	50.8011	38.2157	0.0492087	0.058904	0.0462697	5'missing	B0414.7a.1	5 primer miss: exon 1 to 6	No extra exon.	3025d63b-6302-457e-b958-fae0948689a9
B0414.7_NP2	B0414.7	17.0103	8.33506	4.59279	4.08248	177.468	88.4512	50.8011	38.2157	0.0942335	0.0904073	0.106827	Intron_retention	B0414.7a.1	Intron retention: intron 4 to 4	No extra exon.	3231be82-9237-45b9-a5f5-a434f515f630
B0414.7_NP3	B0414.7	5.05931	2.52966	1.65736	0.872295	177.468	88.4512	50.8011	38.2157	0.0285995	0.0326245	0.0228255	New_junction	NA	NA	NA	35d0f7c3-5aac-4903-83e2-a75ed25f59b4
B0414.7_NP4	B0414.7	10.4968	5.17649	3.16341	2.15687	177.468	88.4512	50.8011	38.2157	0.0585237	0.0622705	0.0564393	5'missing	B0414.7a.1	5 primer miss: exon 1 to 3	No extra exon.	4a0787c3-dcff-4985-896d-74affa742c09
B0414.7_NP5	B0414.7	6.57557	3.28778	2.19186	1.09593	177.468	88.4512	50.8011	38.2157	0.0371706	0.0431458	0.0286774	5'missing	B0414.7a.1	5 primer miss: exon 1 to 7	No extra exon.	4f75c95d-2651-40e7-9c12-996877516845
B0414.7_NP6	B0414.7	8.09548	4.7006	1.56687	1.82801	177.468	88.4512	50.8011	38.2157	0.0531434	0.0308432	0.047834	Intron_retention	B0414.7a.1	Intron retention: intron 7 to 7	No extra exon.	5a651a79-8945-4f43-8a9a-be5001d2df8e
B0414.7_NP7	B0414.7	7.84332	3.75596	2.43032	1.65704	177.468	88.4512	50.8011	38.2157	0.0424636	0.04784	0.0433601	New_junction	NA	NA	NA	8625e415-5cb7-400a-acb3-96ec574832a4
B0414.7_NP8	B0414.7	6.16491	3.03192	1.92022	1.21277	177.468	88.4512	50.8011	38.2157	0.0342779	0.0377988	0.0317348	New_junction	NA	NA	NA	92c5c7c7-09c8-47d5-b908-a1820049043b
B0414.7_NP9	B0414.7	8.46246	4.23123	2.90897	1.32226	177.468	88.4512	50.8011	38.2157	0.0478369	0.0572619	0.0345998	Intron_retention	B0414.7a.1	5 primer miss: exon 1 to 7;Intron retention: intron 10 to 10	No extra exon.	b1f9457e-f7dc-4b96-baf0-42694552eff0
B0414.7_NP10	B0414.7	22.4815	11.3616	6.28514	4.83473	177.468	88.4512	50.8011	38.2157	0.128451	0.123721	0.126511	Intron_retention	B0414.7a.1	Intron retention: intron 9 to 9	No extra exon.	e42cfae8-d1e8-4833-b230-8fa38e93d3b5
B0414.7_NP11	B0414.7	15.9511	8.54521	3.98777	3.41808	177.468	88.4512	50.8011	38.2157	0.0966094	0.0784976	0.0894418	Intron_retention	B0414.7a.1	Intron retention: intron 12 to 12	No extra exon.	e9f68562-8d91-431e-b396-3e388067b5be
B0414.7_NP12	B0414.7	24.4273	11.1836	7.35763	5.8861	177.468	88.4512	50.8011	38.2157	0.126438	0.144832	0.154023	5'extra	B0414.7a.1	No miss exon.	5 primer extra: exon 1 to 1	efd394d6-92b2-4fc4-be04-b6e07368a271
B0414.8_NP1	B0414.8	6.62396	2.68539	1.43221	2.50636	228.813	73.7292	44.1185	110.966	0.0364223	0.0324628	0.0225869	3'missing	B0414.8a.1	3 primer miss: exon 11 to 11	No extra exon.	0023b957-5190-49a7-854a-b02b2a036387
B0414.8_NP1	B0414.8	18.4665	8.07911	3.75101	6.63641	228.813	73.7292	44.1185	110.966	0.109578	0.0850213	0.059806	5'missing	B0414.8a.1	5 primer miss: exon 1 to 1	No extra exon.	269e181c-2112-426a-aa52-1dfd93529f93
B0414.8_NP2	B0414.8	5.92901	2.49643	1.40424	2.02835	228.813	73.7292	44.1185	110.966	0.0338594	0.0318288	0.0182791	3'extra	B0414.8a.1	No miss exon.	3 primer extra: exon 12 to 12	4979ebd8-4954-465b-8957-a6fc8765720b
B0414.8_NP3	B0414.8	13.8424	4.00701	3.27846	6.55692	228.813	73.7292	44.1185	110.966	0.0543476	0.0743103	0.0590897	5'missing	B0414.8a.1	5 primer miss: exon 1 to 2	No extra exon.	521de90f-97d8-4ddf-96c5-a2ef869a848f
B0414.8_NP4	B0414.8	6.74189	2.7332	1.45771	2.55099	228.813	73.7292	44.1185	110.966	0.0370708	0.0330407	0.022989	New_junction	NA	NA	NA	5ff68301-6899-4332-8928-4142e850a1bc
B0414.8_NP5	B0414.8	13.7124	5.21073	3.01674	5.48498	228.813	73.7292	44.1185	110.966	0.0706739	0.0683781	0.0494295	Intron_retention	B0414.8a.1	Intron retention: intron 9 to 9	No extra exon.	758b5576-6b92-4264-82da-61630ada99db
B0414.8_NP6	B0414.8	7.95068	3.13843	1.67383	3.13843	228.813	73.7292	44.1185	110.966	0.042567	0.0379394	0.0282829	New_junction	NA	NA	NA	9959c9c6-a3c6-4fed-9867-bc710975e2b4
B0414.8_NP7	B0414.8	69.6752	20.058	11.6125	38.0047	228.813	73.7292	44.1185	110.966	0.27205	0.263213	0.342491	Intron_retention	B0414.8a.1	Intron retention: intron 2 to 2	No extra exon.	9d7ebc05-a908-4868-b5a8-0b45476ff81f
B0414.8_NP8	B0414.8	5.14983	2.05993	1.1771	1.91279	228.813	73.7292	44.1185	110.966	0.0279391	0.0266805	0.0172377	New_junction	NA	NA	NA	c1050dd4-7a2e-4745-8482-f9c119cfd2f3
B0414.8_NP9	B0414.8	5.50616	1.75196	2.00224	1.75196	228.813	73.7292	44.1185	110.966	0.0237621	0.0453832	0.0157883	5'missing	B0414.8a.1	5 primer miss: exon 1 to 2	No extra exon.	cab5184c-adf0-474e-a0ee-c2f8edabb289
B0416.4_NP1	B0416.4	36.4848	27.3636	0	9.12121	57.049	42.842	0	14.207	0.63871	NA	0.642023	Extra_UTR	B0416.4.1	No miss exon.	No extra exon.	b05acd63-8253-4643-a064-3474d20a5eda
B0416.5_NP1	B0416.5	5.46016	3.43788	0.606684	1.4156	871.962	589.698	88.9681	193.226	0.00582989	0.00681912	0.00732613	3'missing	B0416.5a.1	3 primer miss: exon 5 to 5	No extra exon.	17d3e55c-5c28-4cbd-9758-fcc27864d575
B0416.5_NP1	B0416.5	50.8665	36.5508	4.87344	9.44228	871.962	589.698	88.9681	193.226	0.0619822	0.0547773	0.0488666	Intron_retention	B0416.5a.1	Intron retention: intron 2 to 3	No extra exon.	3bea891d-7de4-4116-b1ee-4396ebe5579e
B0416.5_NP2	B0416.5	6.93794	4.6878	0.562535	1.68761	871.962	589.698	88.9681	193.226	0.00794949	0.00632289	0.00873386	5'missing	B0416.5a.1	5 primer miss: exon 1 to 3	No extra exon.	557d9bb9-0d4d-4f1a-9d53-8e78b7f2784a
B0416.5_NP3	B0416.5	10.4552	8.11449	0.624191	1.71653	871.962	589.698	88.9681	193.226	0.0137604	0.0070159	0.00888352	Intron_retention	B0416.5a.1	Intron retention: intron 3 to 3	No extra exon.	725f6674-ee93-4678-ba8e-ec10c7de7e84
B0416.5_NP4	B0416.5	11.0369	8.60503	0.561197	1.87066	871.962	589.698	88.9681	193.226	0.0145923	0.00630785	0.0096812	5'missing	B0416.5a.1	5 primer miss: exon 1 to 1	No extra exon.	7a068ab4-aafe-46c9-9934-2c525d20ca7e
B0416.5_NP5	B0416.5	200.706	133.403	18.0275	49.2751	871.962	589.698	88.9681	193.226	0.226223	0.202628	0.255013	Extra_UTR	B0416.5a.1	No miss exon.	No extra exon.	832881ab-b4a2-4230-be50-53b9ace312e4
B0416.5_NP6	B0416.5	60.0698	40.6924	8.23537	11.142	871.962	589.698	88.9681	193.226	0.0690055	0.0925654	0.0576629	Intron_retention	B0416.5a.1	Intron retention: intron 2 to 2	Intron extra: intron 2 to 2	8ec0c4e8-436e-4523-8952-2774a6b55d87
B0416.5_NP7	B0416.5	37.423	21.2401	2.02287	14.1601	871.962	589.698	88.9681	193.226	0.0360186	0.022737	0.0732825	New_junction	NA	NA	NA	c279d56c-ece6-402c-b195-90c5e5278f66
B0416.5_NP8	B0416.5	206.521	145.277	22.7886	38.4557	871.962	589.698	88.9681	193.226	0.246358	0.256143	0.199019	Intron_retention	B0416.5a.1	Intron retention: intron 2 to 2	No extra exon.	c9d31085-2949-4e3d-9e8a-aa26dcceff27
B0416.5_NP9	B0416.5	7.60952	5.80387	0.5159	1.28975	871.962	589.698	88.9681	193.226	0.00984211	0.0057987	0.00667483	Intron_retention	B0416.5a.1	Intron retention: intron 2 to 2	5 primer extra: exon 1 to 1	dcbcbac9-49b1-41a9-b9ce-ec28b343b253
B0416.6_NP1	B0416.6	5.20738	1.95277	2.60369	0.650922	65.0093	27.065	15.9568	21.9876	0.072151	0.163172	0.0296041	3'missing	B0416.6.1	5 primer miss: exon 1 to 7;3 primer miss: exon 10 to 12	No extra exon.	3a41806c-2915-4aba-be1b-70fb932ba383
B0416.6_NP1	B0416.6	30.802	12.6832	6.3416	11.7773	65.0093	27.065	15.9568	21.9876	0.46862	0.397424	0.535632	Extra_UTR	B0416.6.1	No miss exon.	No extra exon.	a0d17378-25b4-4579-8458-d55c08aa12d8
B0416.7_NP1	B0416.7	42.0571	0	10.1956	31.8614	57.8893	0	16.8956	40.9937	NA	0.60345	0.777227	Extra_UTR	B0416.7a.1	No miss exon.	No extra exon.	0c980e66-7c89-44f0-9b2f-0e19f6cb0538
B0432.10_NP1	B0432.10	5.33905	2.05348	0.821392	2.46418	128.726	56.2526	26.6143	45.8592	0.0365046	0.0308628	0.0537335	5'missing	B0432.10.2	5 primer miss: exon 1 to 1	No extra exon.	2d69ed23-ba3b-4049-9da1-99828a417eeb
B0432.10_NP1	B0432.10	54.0518	24.569	10.3736	19.1092	128.726	56.2526	26.6143	45.8592	0.436763	0.389774	0.416693	Intron_retention	B0432.10.2	Intron retention: intron 2 to 2	No extra exon.	c256fd43-2e14-4f85-8283-54c18ded81ee
B0432.10_NP2	B0432.10	54.0518	23.4771	10.3736	20.2012	128.726	56.2526	26.6143	45.8592	0.417351	0.389774	0.440504	Missing_UTR	B0432.10.2	No miss exon.	No extra exon.	ce402d64-86ad-4865-9808-ce1f2b3e5c91
B0432.13_NP1	B0432.13	36.9839	13.0985	4.36616	19.5193	193.512	69.7656	22.8644	100.882	0.18775	0.190959	0.193487	Fusion_gene	B0432.9.1	No miss exon.	3 primer extra: exon 3 to 8	074612ef-dc93-4a58-aa81-7febfcdc7396
B0432.13_NP1	B0432.13	38.3106	13.739	4.49159	20.0801	193.512	69.7656	22.8644	100.882	0.196931	0.196445	0.199046	Intron_retention	B0432.13.1	Intron retention: intron 3 to 3	5 primer extra: exon 1 to 2	56c9d91f-4577-43be-b657-089975479697
B0432.13_NP2	B0432.13	36.9839	13.0985	4.36616	19.5193	193.512	69.7656	22.8644	100.882	0.18775	0.190959	0.193487	Intron_retention	B0432.13.1	Intron retention: intron 3 to 3	5 primer extra: exon 1 to 1	9e39fd70-b607-4c35-aa0c-c68071cd11ad
B0432.13_NP3	B0432.13	36.9839	13.0985	4.36616	19.5193	193.512	69.7656	22.8644	100.882	0.18775	0.190959	0.193487	Fusion_gene	B0432.13.1	No miss exon.	5 primer extra: exon 1 to 1	b914c907-8acc-42c6-bb8b-286413cbcf1a
B0432.13_NP4	B0432.13	36.9839	13.0985	4.36616	19.5193	193.512	69.7656	22.8644	100.882	0.18775	0.190959	0.193487	Intron_retention	B0432.13.1	Intron retention: intron 3 to 3;3 primer miss: exon 7 to 7	No extra exon.	babd441b-03ae-42e8-9559-4e61f169f2d5
B0432.14_NP1	B0432.14	32.2983	0.751123	29.2938	2.25337	64.9946	2.15787	58.5933	4.24345	0.348086	0.499952	0.531023	Extra_UTR	B0432.14a.1	No miss exon.	No extra exon.	132f6252-8f7d-4918-aadd-7b98170361f4
B0432.14_NP1	B0432.14	10.4074	0.743385	9.664	0	64.9946	2.15787	58.5933	4.24345	0.3445	0.164934	0	Extra_UTR	B0432.14a.1	No miss exon.	No extra exon.	4194e16d-376e-4001-88e3-5cec05f9eac2
B0432.2_NP1	B0432.2	6.89895	1.14982	1.14982	4.5993	487.744	142.625	125.345	219.774	0.00806185	0.00917329	0.0209274	3'missing	B0432.2.1	3 primer miss: exon 3 to 3	No extra exon.	9091abec-b1a6-41cc-8df6-4a6a09d86534
B0432.2_NP1	B0432.2	6.23827	2.33935	2.33935	1.55957	487.744	142.625	125.345	219.774	0.0164021	0.0186633	0.00709624	Missing_UTR	B0432.2.1	No miss exon.	No extra exon.	94af5b95-e996-452d-ba0c-f9ae1708a648
B0432.2_NP2	B0432.2	9.99731	4.54423	1.36327	4.08981	487.744	142.625	125.345	219.774	0.0318613	0.0108761	0.0186092	3'missing	B0432.2.1	3 primer miss: exon 3 to 3	No extra exon.	d86e6692-ee00-4b33-af8d-6d9c955f9f9c
B0432.2_NP3	B0432.2	237.972	68.4763	60.3405	109.155	487.744	142.625	125.345	219.774	0.480113	0.481396	0.496671	Extra_UTR	B0432.2.1	No miss exon.	No extra exon.	da92bea9-dd5a-4f55-9172-da82750c76d8
B0432.3_NP1	B0432.3	5.14104	2.57052	1.71368	0.856841	23.881	12.3604	7.60313	3.91744	0.207964	0.225391	0.218725	Extra_UTR	B0432.3.1	No miss exon.	No extra exon.	b674bdf3-5e47-4c5b-823d-5277acb0f3de
B0432.3_NP1	B0432.3	12.438	5.74062	4.78385	1.91354	23.881	12.3604	7.60313	3.91744	0.464436	0.629195	0.488467	Extra_UTR	B0432.3.1	No miss exon.	No extra exon.	c1e04aa5-329b-43b7-ad13-e507f3cc2459
B0432.4_NP1	B0432.4	113.624	28.7182	53.6905	31.2154	362.195	119.801	140.12	102.273	0.239715	0.383176	0.305215	5'missing	B0432.4.1	5 primer miss: exon 1 to 1	No extra exon.	1d6676fa-3ff5-4f7c-870e-b068bd85962a
B0432.4_NP1	B0432.4	221.796	79.9921	75.1441	66.66	362.195	119.801	140.12	102.273	0.667705	0.536284	0.651782	Extra_UTR	B0432.4.1	No miss exon.	No extra exon.	6a0c187e-82e9-4882-b046-9c5bc259708f
B0432.4_NP2	B0432.4	15.491	5.38819	7.40876	2.6941	362.195	119.801	140.12	102.273	0.044976	0.0528744	0.0263421	New_junction	NA	NA	NA	d0db838b-c55c-4bd5-a9a0-c1aa1cad5f3f
B0432.7_NP1	B0432.7	7.96033	5.30688	0	2.65344	7.96033	5.30688	0	2.65344	1	NA	1	3'missing	B0432.7b.1	5 primer miss: exon 1 to 1;3 primer miss: exon 7 to 13	No extra exon.	669fffd3-fe1b-485d-975a-bffbb485a00b
B0432.8_NP1	B0432.8	60.0783	17.3303	9.24282	33.5052	86.2369	21.5071	11.3789	53.3508	0.805793	0.812277	0.628017	3'missing	B0432.8.1	3 primer miss: exon 5 to 5	No extra exon.	1e55e0c7-6322-41bd-bc18-61383f669288
B0432.8_NP1	B0432.8	11.3214	1.74175	1.74175	7.83786	86.2369	21.5071	11.3789	53.3508	0.0809846	0.153068	0.146912	5'extra	B0432.8.1	3 primer miss: exon 5 to 5	5 primer extra: exon 1 to 7	87d245cb-6e69-4a74-9a5b-9328012eeba4
B0432.9_NP1	B0432.9	7.98244	3.42104	2.2807	2.2807	21.0949	10.1301	5.61259	5.35216	0.33771	0.406354	0.426126	Extra_UTR	B0432.9.1	No miss exon.	No extra exon.	a771b867-c5eb-492e-bba9-37d973f235e8
B0454.1_NP1	B0454.1	38.298	28.8708	3.5352	5.892	63.1961	45.5849	6.52927	11.082	0.633342	0.541439	0.531673	Extra_UTR	B0454.1.1	No miss exon.	No extra exon.	7a97bb53-09a0-4b32-8121-1f43a40803be
B0454.5_NP1	B0454.5	38.696	2.4185	7.25551	29.022	45.1085	2.4185	9.28981	33.4002	1	0.781018	0.868918	Extra_UTR	B0454.5.1	No miss exon.	No extra exon.	85210f1f-d074-4fd5-9ddd-45bdbbb32de4
B0454.6_NP1	B0454.6	17.9107	0	9.55239	8.35834	23.881	0	12.427	11.454	NA	0.768683	0.72973	Extra_UTR	B0454.6.1	No miss exon.	No extra exon.	6f8a4144-ee3b-4922-ade6-1aa8ccd29871
B0454.9_NP1	B0454.9	32.3499	23.7569	4.5492	4.04374	106.071	74.7381	14.6559	16.6774	0.317869	0.310402	0.242469	Missing_UTR	B0454.9.2	No miss exon.	No extra exon.	f6519ac5-d419-468c-885d-078363c2450e
B0457.1_NP1	B0457.1	35.1581	21.5254	5.7401	7.89264	79.6033	48.9855	14.1925	16.4253	0.439424	0.404445	0.480518	Extra_exon	B0457.1b.1	No miss exon.	Exon extra: exon 4 to 4	50f03a00-6551-43ee-b837-84f6f9a0362a
B0457.1_NP1	B0457.1	5.528	2.764	2.764	0	79.6033	48.9855	14.1925	16.4253	0.0564249	0.194751	0	Intron_retention	B0457.1a.1	Intron retention: intron 3 to 4	Intron extra: intron 3 to 3	883cabde-bc8c-49c3-b7ca-bed924735f7a
B0457.1_NP2	B0457.1	36.2637	22.0426	5.68842	8.53264	79.6033	48.9855	14.1925	16.4253	0.449983	0.400804	0.519482	Extra_exon	B0457.1a.1	No miss exon.	Exon extra: exon 7 to 7	e064f1a1-f6b4-4610-b5e2-f0eff0337abc
B0457.2_NP1	B0457.2	17.2832	2.07399	10.3699	4.8393	106.083	12.4847	67.4149	26.1837	0.166122	0.153823	0.184821	Missing_UTR	B0457.2.1	No miss exon.	No extra exon.	11549ee1-d549-4da4-9401-3b7e23da6947
B0457.2_NP1	B0457.2	13.1277	1.51474	10.6032	1.00983	106.083	12.4847	67.4149	26.1837	0.121327	0.157282	0.0385669	5'missing	B0457.2.1	5 primer miss: exon 1 to 1	No extra exon.	4be13b88-5b74-4773-aab9-e9e984305529
B0457.2_NP2	B0457.2	5.83078	0.832968	4.16484	0.832968	106.083	12.4847	67.4149	26.1837	0.0667189	0.0617792	0.0318124	Extra_UTR	B0457.2.1	No miss exon.	No extra exon.	549973ac-7610-4e81-93a3-972cce308253
B0457.2_NP3	B0457.2	35.0186	3.25755	18.7309	13.0302	106.083	12.4847	67.4149	26.1837	0.260922	0.277845	0.497644	Missing_UTR	B0457.2.1	No miss exon.	No extra exon.	ba654df3-e792-427f-b6c0-d99f659d60fb
B0457.2_NP4	B0457.2	25.4662	3.08682	17.7492	4.63023	106.083	12.4847	67.4149	26.1837	0.247247	0.263283	0.176836	5'missing	B0457.2.1	5 primer miss: exon 1 to 2	No extra exon.	d84190d1-a0d0-4e80-bd60-fe218ef979d4
B0457.6_NP1	B0457.6	6.14714	1.22943	3.07357	1.84414	32.9911	8.92897	10.1561	13.9061	0.13769	0.302633	0.132614	Missing_UTR	B0457.6.1	No miss exon.	No extra exon.	00a72aca-1d7a-46aa-8b29-86ef47740a1f
B0457.6_NP1	B0457.6	10.1273	1.44676	2.89352	5.78703	32.9911	8.92897	10.1561	13.9061	0.16203	0.284905	0.416151	5'missing	B0457.6.1	5 primer miss: exon 1 to 1	No extra exon.	277a3821-7562-42e8-bed4-5612cd4b2d70
B0457.6_NP2	B0457.6	5.35111	0.891851	0.891851	3.56741	32.9911	8.92897	10.1561	13.9061	0.0998829	0.0878145	0.256536	5'missing	B0457.6.1	5 primer miss: exon 1 to 1	No extra exon.	44ea96dc-cd5b-4677-8fef-462d58833859
B0462.3_NP1	B0462.3	5.30688	5.30688	0	0	46.1036	46.1036	0	0	0.115108	NA	NA	3'extra	B0462.3.1	5 primer miss: exon 1 to 2;3 primer miss: exon 2 to 3	5 primer extra: exon 1 to 1;3 primer extra: exon 2 to 2	57c2d352-4da6-42ec-926d-da2cf8b82ca5
B0462.3_NP1	B0462.3	37.2587	37.2587	0	0	46.1036	46.1036	0	0	0.808153	NA	NA	Extra_UTR	B0462.3.1	No miss exon.	No extra exon.	de8c80ee-7919-4798-a01f-90bffa57cb24
B0464.1_NP1	B0464.1	6.27337	2.26253	1.54263	2.46821	1031.65	292.163	218.257	521.231	0.00774405	0.00706797	0.00473535	New_junction	NA	NA	NA	0b54fd68-7e07-4114-92ad-1de8c4f906c3
B0464.1_NP1	B0464.1	17.6389	5.54933	4.36019	7.72943	1031.65	292.163	218.257	521.231	0.0189939	0.0199773	0.0148292	3'missing	B0464.1.1	5 primer miss: exon 1 to 4;3 primer miss: exon 2 to 5	No extra exon.	2c91a696-2351-4ec7-a7d5-fdf07ca81207
B0464.1_NP2	B0464.1	10.8432	4.21679	2.4096	4.21679	1031.65	292.163	218.257	521.231	0.014433	0.0110402	0.00809007	Intron_retention	B0464.1.1	Intron retention: intron 2 to 3	No extra exon.	4803bef4-e278-4212-baa1-3503ee0eda10
B0464.1_NP3	B0464.1	24.7148	8.15828	6.23869	10.3178	1031.65	292.163	218.257	521.231	0.0279237	0.0285841	0.0197951	5'missing	B0464.1.1	5 primer miss: exon 1 to 3	No extra exon.	588011e7-0319-4184-aaaa-211fa7af1f9d
B0464.1_NP4	B0464.1	12.6403	5.41728	3.09559	4.12745	1031.65	292.163	218.257	521.231	0.018542	0.0141832	0.00791866	3'missing	B0464.1.1	3 primer miss: exon 5 to 5	No extra exon.	6bd022eb-31ef-4c9b-b6de-c74c4c634e2f
B0464.1_NP5	B0464.1	15.4771	5.54839	4.38031	5.54839	1031.65	292.163	218.257	521.231	0.0189907	0.0200695	0.0106448	5'missing	B0464.1.1	5 primer miss: exon 1 to 1	No extra exon.	819ff9e0-46b3-4b47-9d4d-256c590e1980
B0464.1_NP6	B0464.1	7.72539	3.53535	1.30939	2.88065	1031.65	292.163	218.257	521.231	0.0121006	0.0059993	0.00552664	3'missing	B0464.1.1	3 primer miss: exon 5 to 5	No extra exon.	9f0b659e-faf4-4776-aad6-bcb220d0fb2a
B0464.1_NP7	B0464.1	8.75729	4.2374	1.41247	3.10742	1031.65	292.163	218.257	521.231	0.0145035	0.00647158	0.0059617	3'missing	B0464.1.1	3 primer miss: exon 5 to 5	No extra exon.	a0eb33a6-56d2-4ee4-b1f5-3ba9d25aa3ee
B0464.1_NP8	B0464.1	5.27201	2.25943	0.968329	2.04425	1031.65	292.163	218.257	521.231	0.00773346	0.00443665	0.00392196	Intron_retention	B0464.1.1	Intron retention: intron 3 to 3	3 primer extra: exon 5 to 5	b7384b3a-f3d5-4dfa-aafd-4dd0024fa6b8
B0464.1_NP9	B0464.1	19.8143	7.88071	3.82777	8.10587	1031.65	292.163	218.257	521.231	0.0269736	0.0175379	0.0155514	Intron_retention	B0464.1.1	Intron retention: intron 2 to 2	No extra exon.	bdf90a85-809c-41bb-aa8b-237fb6221ca4
B0464.1_NP10	B0464.1	10.3357	4.13427	2.70317	3.49822	1031.65	292.163	218.257	521.231	0.0141505	0.0123853	0.00671147	5'missing	B0464.1.1	5 primer miss: exon 1 to 1	No extra exon.	c8fa1a7d-6cae-4c29-82a4-49aad5b56153
B0464.1_NP11	B0464.1	126.358	30.1343	21.5734	74.6508	1031.65	292.163	218.257	521.231	0.103142	0.0988441	0.14322	Extra_UTR	B0464.1.1	No miss exon.	No extra exon.	cf90690b-0f6f-4037-859a-9a12a3840472
B0464.1_NP12	B0464.1	95.9934	32.8236	26.6304	36.5394	1031.65	292.163	218.257	521.231	0.112347	0.122014	0.0701022	Intron_retention	B0464.1.1	Intron retention: intron 3 to 3	No extra exon.	e295bd96-f9c2-4868-ba90-5df8adb9e5c3
B0464.1_NP13	B0464.1	316.389	83.2347	66.1983	166.956	1031.65	292.163	218.257	521.231	0.284891	0.303305	0.320311	Extra_UTR	B0464.1.1	No miss exon.	No extra exon.	f8f48ef4-4134-4330-bcc9-a94d080788fd
B0464.2_NP1	B0464.2	17.6572	8.78287	3.65953	5.21483	332.965	169.382	67.7333	95.8496	0.0518524	0.0540286	0.0544064	3'missing	B0464.2a.1	5 primer miss: exon 1 to 2;3 primer miss: exon 5 to 6	No extra exon.	05954581-1726-40f1-9498-c60a705fd0ed
B0464.2_NP1	B0464.2	15.6614	7.91582	3.06419	4.6814	332.965	169.382	67.7333	95.8496	0.0467335	0.0452391	0.0488411	3'missing	B0464.2a.1	5 primer miss: exon 1 to 1;3 primer miss: exon 5 to 6	No extra exon.	151d8a68-5add-43f8-b7ca-b1e8c6b9aa73
B0464.2_NP2	B0464.2	19.2573	9.92957	3.61075	5.71702	332.965	169.382	67.7333	95.8496	0.0586223	0.0533084	0.0596457	3'missing	B0464.2a.1	5 primer miss: exon 1 to 1;3 primer miss: exon 5 to 6	No extra exon.	1bdd323c-672d-4048-abea-d978a188c4b5
B0464.2_NP3	B0464.2	16.566	8.50212	3.15543	4.90844	332.965	169.382	67.7333	95.8496	0.0501949	0.0465861	0.0512098	5'missing	B0464.2a.1	5 primer miss: exon 1 to 1	No extra exon.	242e8d3f-ef72-4184-9732-7ca1e8a43cd6
B0464.2_NP4	B0464.2	20.2443	10.1222	4.20922	5.91295	332.965	169.382	67.7333	95.8496	0.0597594	0.0621441	0.0616899	3'missing	B0464.2a.1	3 primer miss: exon 4 to 6	No extra exon.	47520c64-8701-4301-9d42-2f10a5caf831
B0464.2_NP5	B0464.2	33.5922	17.8409	6.58987	9.16152	332.965	169.382	67.7333	95.8496	0.105329	0.0972914	0.0955822	5'missing	B0464.2a.1	5 primer miss: exon 1 to 1	No extra exon.	65d6c629-3626-4ca9-9ef7-9108d31b8e83
B0464.2_NP6	B0464.2	23.5028	11.9169	4.85505	6.73086	332.965	169.382	67.7333	95.8496	0.0703554	0.0716789	0.0702231	New_junction	NA	NA	NA	8248619d-b100-4da9-850e-7fec722028d9
B0464.2_NP7	B0464.2	17.561	9.05491	3.38416	5.12197	332.965	169.382	67.7333	95.8496	0.0534585	0.049963	0.0534375	New_junction	B0464.2a.1	No miss exon.	Intron extra: intron 2 to 2	85d1af6a-aaea-4665-95ca-81705ce1fe0f
B0464.2_NP8	B0464.2	16.0353	8.23203	3.08701	4.71627	332.965	169.382	67.7333	95.8496	0.0486003	0.045576	0.0492048	3'missing	B0464.2a.1	5 primer miss: exon 1 to 1;3 primer miss: exon 5 to 6	No extra exon.	961b027b-9d81-4bda-9267-a1bd21626c46
B0464.2_NP9	B0464.2	15.5925	7.92405	3.06737	4.60106	332.965	169.382	67.7333	95.8496	0.0467821	0.0452861	0.0480029	Intron_retention	B0464.2a.1	Intron retention: intron 2 to 2;3 primer miss: exon 5 to 6	Intron extra: intron 2 to 2	bc505e86-6f5f-48f9-9c02-b9be5e7f14cb
B0464.2_NP10	B0464.2	16.2564	8.38762	3.11293	4.75587	332.965	169.382	67.7333	95.8496	0.049519	0.0459587	0.049618	3'missing	B0464.2a.1	3 primer miss: exon 6 to 6	No extra exon.	c2b6190d-7c5e-4ad0-bf38-98a68f1337fc
B0464.2_NP11	B0464.2	49.4244	24.2709	10.8116	14.3419	332.965	169.382	67.7333	95.8496	0.143291	0.15962	0.149629	Intron_retention	B0464.2a.1	Intron retention: intron 4 to 4	No extra exon.	cb8332f1-627d-40b1-9475-7ece61fccced
B0464.2_NP12	B0464.2	19.2493	9.67302	4.06267	5.51362	332.965	169.382	67.7333	95.8496	0.0571077	0.0599804	0.0575236	3'missing	B0464.2a.1	5 primer miss: exon 1 to 1;3 primer miss: exon 5 to 6	No extra exon.	d3b3281c-02ff-419b-876f-b94b64e200dc
B0464.3_NP1	B0464.3	235.692	39.8432	49.3831	146.466	409.758	74.2733	93.5934	241.891	0.53644	0.527634	0.605503	Extra_UTR	B0464.3.1	No miss exon.	No extra exon.	54563c37-74c4-4e43-9c46-60b8ec1ce8de
B0464.3_NP1	B0464.3	35.5782	8.89456	11.3203	15.3633	409.758	74.2733	93.5934	241.891	0.119754	0.120952	0.0635134	5'missing	B0464.3.1	5 primer miss: exon 1 to 1	No extra exon.	eb49a5e8-e016-4131-908a-7acfa2d4a49c
B0464.3_NP2	B0464.3	17.0041	5.66805	6.18332	5.15277	409.758	74.2733	93.5934	241.891	0.0763133	0.0660658	0.021302	Extra_UTR	B0464.3.1	No miss exon.	No extra exon.	f0927fd5-96c4-4563-93d8-d77b0998a7e3
B0464.4_NP1	B0464.4	6.41602	1.35074	1.68843	3.37685	139.776	21.4402	34.8472	83.4886	0.0630002	0.0484523	0.0404468	Intron_retention	B0464.4a.2	Intron retention: intron 4 to 4	No extra exon.	0900cc45-5830-427d-963e-302ae7b403bc
B0464.4_NP1	B0464.4	6.16331	1.26427	1.73837	3.16067	139.776	21.4402	34.8472	83.4886	0.0589671	0.0498855	0.0378575	5'missing	B0464.4a.2	5 primer miss: exon 1 to 2	No extra exon.	16714405-6350-4e12-979a-e4d55a7d13f0
B0464.4_NP2	B0464.4	26.2368	3.85835	3.08668	19.2917	139.776	21.4402	34.8472	83.4886	0.179958	0.0885776	0.23107	3'missing	B0464.4a.2	3 primer miss: exon 8 to 8	No extra exon.	16c6e45b-7103-47b4-8b6f-d1e26c32e99e
B0464.4_NP3	B0464.4	6.16331	1.36962	1.71203	3.08165	139.776	21.4402	34.8472	83.4886	0.063881	0.0491297	0.0369111	New_junction	NA	NA	NA	1d108793-a1aa-483d-a0fc-80ff0748582f
B0464.4_NP4	B0464.4	11.4702	1.95237	2.68451	6.83331	139.776	21.4402	34.8472	83.4886	0.0910611	0.0770367	0.0818472	5'extra	B0464.4a.1	5 primer miss: exon 1 to 1	5 primer extra: exon 1 to 1	695778b3-36fc-4916-9f0b-68c314d76e54
B0464.4_NP5	B0464.4	22.7473	3.63957	4.09452	15.0132	139.776	21.4402	34.8472	83.4886	0.169754	0.117499	0.179824	Extra_UTR	B0464.4a.1	No miss exon.	No extra exon.	922f639f-7918-4c80-9f6f-36d6c6601160
B0464.4_NP6	B0464.4	5.08929	1.13095	1.27232	2.68602	139.776	21.4402	34.8472	83.4886	0.0527491	0.0365115	0.0321723	New_junction	NA	NA	NA	c6436d9a-f735-45d8-ae99-890f09a75961
B0464.4_NP7	B0464.4	6.4713	1.61782	1.82005	3.03342	139.776	21.4402	34.8472	83.4886	0.0754573	0.0522295	0.0363333	3'missing	B0464.4a.2	5 primer miss: exon 1 to 7;3 primer miss: exon 2 to 8	No extra exon.	deaeea9e-4165-4120-8f31-b9b4ce077fa9
B0464.5_NP1	B0464.5	52.8516	25.1573	7.61063	20.0836	637.695	285.304	104.144	248.247	0.0881774	0.0730777	0.0809016	Intron_retention	B0464.5d.1	Intron retention: intron 7 to 7	No extra exon.	0c4fd2b4-4ea5-4291-97d8-bdb91bd24056
B0464.5_NP1	B0464.5	6.35094	2.86078	1.0871	2.40306	637.695	285.304	104.144	248.247	0.0100272	0.0104384	0.00968011	3'missing	B0464.5d.2	5 primer miss: exon 1 to 4;3 primer miss: exon 9 to 9	No extra exon.	184e574a-806e-4781-bbc4-fd926b2ee59b
B0464.5_NP2	B0464.5	57.0142	27.0762	8.14488	21.7931	637.695	285.304	104.144	248.247	0.0949031	0.0782076	0.0877877	Intron_retention	B0464.5d.1	Intron retention: intron 8 to 8	No extra exon.	1a7da945-9496-498a-825c-391d20222147
B0464.5_NP3	B0464.5	14.5881	5.27656	2.1727	7.13888	637.695	285.304	104.144	248.247	0.0184945	0.0208624	0.0287571	New_junction	NA	NA	NA	1ed5541e-885a-4f72-a0d0-3436b494cadd
B0464.5_NP4	B0464.5	12.1936	5.47827	2.29734	4.41796	637.695	285.304	104.144	248.247	0.0192015	0.0220592	0.0177966	3'missing	B0464.5d.2	5 primer miss: exon 1 to 1;3 primer miss: exon 9 to 9	No extra exon.	250d2fe1-709a-424b-8914-3ad9965587a2
B0464.5_NP5	B0464.5	5.89512	2.70418	1.02759	2.16335	637.695	285.304	104.144	248.247	0.00947826	0.00986698	0.00871449	3'missing	B0464.5d.2	3 primer miss: exon 9 to 9	No extra exon.	2a99991b-fc09-4894-b5a7-2b0f2fe61596
B0464.5_NP6	B0464.5	23.0813	9.47547	3.40145	10.2043	637.695	285.304	104.144	248.247	0.0332118	0.0326609	0.0411056	3'extra	B0464.5d.1	3 primer miss: exon 7 to 10	3 primer extra: exon 7 to 11	2b3caa35-10a2-46ac-9c43-efc292d45b36
B0464.5_NP7	B0464.5	38.2279	18.8917	7.55667	11.7795	637.695	285.304	104.144	248.247	0.066216	0.0725597	0.0474508	3'missing	B0464.5c.1	3 primer miss: exon 11 to 11	No extra exon.	2edb96b3-87b9-4b23-8181-3fad3039313c
B0464.5_NP8	B0464.5	14.4977	5.04267	2.20617	7.24884	637.695	285.304	104.144	248.247	0.0176748	0.0211838	0.0292001	3'missing	B0464.5c.1	3 primer miss: exon 10 to 11	No extra exon.	3a85d518-b842-47cd-a6b4-e4763216aafb
B0464.5_NP9	B0464.5	11.4732	5.06957	2.31244	4.09123	637.695	285.304	104.144	248.247	0.017769	0.0222042	0.0164805	Extra_UTR	B0464.5a.1	No miss exon.	No extra exon.	4c3b5ef3-4457-4088-a605-d03252563cc6
B0464.5_NP10	B0464.5	6.87073	3.13402	1.20539	2.53132	637.695	285.304	104.144	248.247	0.0109848	0.0115742	0.0101968	5'missing	B0464.5b.1	5 primer miss: exon 1 to 3	No extra exon.	4de18233-49d9-4417-a488-f2bc83479bc4
B0464.5_NP11	B0464.5	5.58555	2.64316	0.99742	1.94497	637.695	285.304	104.144	248.247	0.00926438	0.00957729	0.00783481	3'missing	B0464.5d.2	5 primer miss: exon 1 to 1;3 primer miss: exon 9 to 9	No extra exon.	5a6dafaa-8f8e-49b6-851d-86156dfcfaf8
B0464.5_NP12	B0464.5	13.6466	6.06518	2.81597	4.7655	637.695	285.304	104.144	248.247	0.0212587	0.0270392	0.0191966	5'extra	B0464.5c.1	5 primer miss: exon 1 to 2	5 primer extra: exon 1 to 1	7d76d34f-6eca-4016-b3af-0e6c4c047c16
B0464.5_NP13	B0464.5	8.05889	3.62338	1.37438	3.06113	637.695	285.304	104.144	248.247	0.0127001	0.0131969	0.012331	Missing_UTR	B0464.5a.1	No miss exon.	No extra exon.	892a7bc6-680d-4e8d-a01f-b8472610d16a
B0464.5_NP14	B0464.5	7.50881	3.48409	1.32155	2.70317	637.695	285.304	104.144	248.247	0.0122119	0.0126896	0.010889	3'missing	B0464.5d.2	5 primer miss: exon 1 to 2;3 primer miss: exon 8 to 9	No extra exon.	8b14aec9-543d-4998-a440-3bde4e8484e2
B0464.5_NP15	B0464.5	5.1888	2.30613	1.02002	1.86265	637.695	285.304	104.144	248.247	0.00808308	0.0097943	0.00750319	Intron_retention	B0464.5a.1	Intron retention: intron 6 to 6	No extra exon.	8fb2ab15-7d1c-40b5-8517-477e3df86c91
B0464.5_NP16	B0464.5	93.9832	45.1958	13.4689	35.3185	637.695	285.304	104.144	248.247	0.158413	0.12933	0.142272	3'missing	B0464.5d.1	3 primer miss: exon 10 to 10	No extra exon.	90d7aa3a-89fd-47e2-8ce6-b2af5739855e
B0464.5_NP17	B0464.5	13.1196	5.83093	2.7211	4.56756	637.695	285.304	104.144	248.247	0.0204376	0.0261282	0.0183992	3'missing	B0464.5a.1	3 primer miss: exon 9 to 9	No extra exon.	a6586fbd-1a17-469c-b626-ebd321fa3a38
B0464.5_NP18	B0464.5	19.9573	9.04538	3.58943	7.32245	637.695	285.304	104.144	248.247	0.0317044	0.034466	0.0294966	Extra_UTR	B0464.5d.2	No miss exon.	No extra exon.	c2224df9-7b1c-41f6-a3a4-7ca627d58e6e
B0464.5_NP19	B0464.5	5.4364	2.50171	0.962196	1.9725	637.695	285.304	104.144	248.247	0.00876858	0.00923906	0.00794571	Intron_retention	B0464.5b.1	5 primer miss: exon 1 to 5;Intron retention: intron 9 to 9	No extra exon.	c72b8c6b-46cd-4892-af35-bc3f9852cee8
B0464.5_NP20	B0464.5	21.7545	8.97806	3.22289	9.55358	637.695	285.304	104.144	248.247	0.0314684	0.0309464	0.0384841	3'extra	B0464.5d.2	5 primer miss: exon 1 to 2;3 primer miss: exon 6 to 9	3 primer extra: exon 4 to 10	d04d65c2-b365-452c-a2a4-79b2fda20536
B0464.5_NP21	B0464.5	14.4977	5.04267	2.20617	7.24884	637.695	285.304	104.144	248.247	0.0176748	0.0211838	0.0292001	3'missing	B0464.5d.1	3 primer miss: exon 8 to 10	No extra exon.	d0fa7a34-4690-4a6e-b48d-274e57abd4ba
B0464.5_NP22	B0464.5	10.2038	4.42663	1.80066	3.97646	637.695	285.304	104.144	248.247	0.0155155	0.0172901	0.0160182	5'missing	B0464.5d.2	5 primer miss: exon 1 to 1	No extra exon.	ddab15dd-1ea7-471b-a483-0b6e4c7605bd
B0464.5_NP23	B0464.5	15.1883	7.5395	2.95024	4.69853	637.695	285.304	104.144	248.247	0.0264262	0.0283284	0.0189268	3'extra	B0464.5d.1	3 primer miss: exon 10 to 10	3 primer extra: exon 10 to 10	f663359b-3f3b-42d7-90a3-f4770e3544d1
B0464.6_NP1	B0464.6	14.5069	5.74804	1.91601	6.8429	390.746	177.296	51.1571	162.294	0.0324206	0.0374535	0.0421637	5'missing	B0464.6.2	5 primer miss: exon 1 to 3	No extra exon.	0767726a-cc90-4284-a5f6-bccde42e5e2a
B0464.6_NP1	B0464.6	26.9813	12.7153	3.72156	10.5444	390.746	177.296	51.1571	162.294	0.0717182	0.0727476	0.0649712	5'missing	B0464.6.2	5 primer miss: exon 1 to 1	No extra exon.	338dbb19-bbbb-4bed-b428-17fb75bd40f6
B0464.6_NP2	B0464.6	5.79266	3.24954	0.988991	1.55413	390.746	177.296	51.1571	162.294	0.0183284	0.0193324	0.00957603	5'missing	B0464.6.2	5 primer miss: exon 1 to 1	No extra exon.	52876408-ef86-4f96-b63b-0272adde3d21
B0464.6_NP3	B0464.6	151.219	65.1012	16.916	69.202	390.746	177.296	51.1571	162.294	0.36719	0.330669	0.4264	Extra_UTR	B0464.6.2	No miss exon.	No extra exon.	837278ef-01de-4a6a-b3ea-8aa1648c938f
B0464.6_NP4	B0464.6	7.62853	4.82621	1.08979	1.71253	390.746	177.296	51.1571	162.294	0.0272213	0.0213028	0.010552	3'missing	B0464.6.2	3 primer miss: exon 5 to 6	No extra exon.	9eac6580-25bd-449b-abe3-42e659feec80
B0464.6_NP5	B0464.6	8.29189	5.14097	1.16087	1.99005	390.746	177.296	51.1571	162.294	0.0289966	0.0226922	0.0122621	New_junction	NA	NA	NA	e02504ed-5d97-4bba-9eb4-e2ce25978f63
B0464.7_NP1	B0464.7	517.128	289.33	51.7128	176.085	1133.53	683.886	115.649	333.99	0.423068	0.447152	0.527218	Extra_UTR	B0464.7.1	No miss exon.	No extra exon.	0be41525-e8c3-4845-942a-509b9e339751
B0464.7_NP1	B0464.7	12.1426	9.10692	1.37984	1.6558	1133.53	683.886	115.649	333.99	0.0133164	0.0119312	0.00495765	3'missing	B0464.7.1	5 primer miss: exon 1 to 1;3 primer miss: exon 2 to 2	No extra exon.	433964f5-0f47-4dea-a0df-68f80a8a2d87
B0464.7_NP2	B0464.7	146.171	107.61	14.3481	24.2123	1133.53	683.886	115.649	333.99	0.157351	0.124065	0.0724943	Extra_UTR	B0464.7.1	No miss exon.	No extra exon.	4e488d8e-4686-41bd-854c-962e2c1e93a0
B0464.7_NP3	B0464.7	7.37935	4.91956	0.409964	2.04982	1133.53	683.886	115.649	333.99	0.00719354	0.00354488	0.00613737	Missing_UTR	B0464.7.1	No miss exon.	No extra exon.	52ce57e8-4562-4aef-a98e-87c50cf6cdee
B0464.7_NP4	B0464.7	24.7531	13.6569	0.853554	10.2427	1133.53	683.886	115.649	333.99	0.0199695	0.00738053	0.0306676	Extra_UTR	B0464.7.1	No miss exon.	No extra exon.	573cc01b-a102-4b70-b127-30efdc5952fc
B0464.7_NP5	B0464.7	40.1279	25.6818	4.01279	10.4332	1133.53	683.886	115.649	333.99	0.0375528	0.0346979	0.0312382	3'missing	B0464.7.1	5 primer miss: exon 1 to 1;3 primer miss: exon 2 to 2	No extra exon.	7774b8b0-fab2-46c7-9e25-54e16bcf8636
B0464.7_NP6	B0464.7	18.9888	13.2921	1.89888	3.79776	1133.53	683.886	115.649	333.99	0.0194362	0.0164193	0.0113709	Extra_UTR	B0464.7.1	No miss exon.	No extra exon.	8df303d6-b569-497d-948f-25ba29d022cc
B0464.7_NP7	B0464.7	8.04271	4.02135	0	4.02135	1133.53	683.886	115.649	333.99	0.00588015	0	0.0120404	Extra_UTR	B0464.7.1	No miss exon.	No extra exon.	9939383c-e1e5-44e2-b0b8-383f3934f67c
B0464.7_NP8	B0464.7	39.951	24.7844	3.69916	11.4674	1133.53	683.886	115.649	333.99	0.0362405	0.031986	0.0343346	Extra_UTR	B0464.7.1	No miss exon.	No extra exon.	99cc4996-e170-4f54-bfdc-3fe9a6901be4
B0464.7_NP9	B0464.7	5.85046	4.12974	1.03243	0.688289	1133.53	683.886	115.649	333.99	0.00603863	0.00892727	0.00206081	Extra_UTR	B0464.7.1	No miss exon.	No extra exon.	d88ef6aa-a457-4c8c-a76d-3b08765c6f91
B0464.7_NP10	B0464.7	12.172	6.08598	1.52149	4.56448	1133.53	683.886	115.649	333.99	0.00889911	0.0131561	0.0136665	Extra_UTR	B0464.7.1	No miss exon.	No extra exon.	deb4a87f-cf90-4ab2-bd92-e8c0bdbdc4dd
B0464.8_NP1	B0464.8	8.79656	5.27794	0.586437	2.93219	193.701	88.5423	18.4316	86.7273	0.0596092	0.0318169	0.0338093	3'missing	B0464.8.1	3 primer miss: exon 7 to 7	No extra exon.	004801b0-8e9c-46ec-b389-856a275f0c1f
B0464.8_NP1	B0464.8	6.71803	3.88939	0.353581	2.47506	193.701	88.5423	18.4316	86.7273	0.0439269	0.0191834	0.0285385	5'missing	B0464.8.1	5 primer miss: exon 1 to 2	No extra exon.	020a0913-3b37-413d-a015-52283adf48fa
B0464.8_NP2	B0464.8	69.0739	31.4896	12.1895	25.3948	193.701	88.5423	18.4316	86.7273	0.355644	0.661336	0.292812	5'missing	B0464.8.1	5 primer miss: exon 1 to 1	No extra exon.	10358c71-e739-449c-8c80-47e8a24290df
B0464.8_NP3	B0464.8	69.0739	31.5523	1.70553	35.8161	193.701	88.5423	18.4316	86.7273	0.356353	0.0925327	0.412974	Extra_UTR	B0464.8.1	No miss exon.	No extra exon.	2dd1c57a-2fa8-4680-a34b-efd5cd59fe4d
B0464.8_NP4	B0464.8	6.89493	2.46247	0.98499	3.44746	193.701	88.5423	18.4316	86.7273	0.0278113	0.0534402	0.0397506	Intron_retention	B0464.8.1	5 primer miss: exon 1 to 1;Intron retention: intron 4 to 4	Intron extra: intron 3 to 3	8e374467-f15b-43ee-8d1f-e3dae3c05b57
B0464.9_NP1	B0464.9	154.083	56.1682	16.6986	81.2161	271.51	102.91	31.5559	137.045	0.5458	0.529177	0.592626	Extra_UTR	B0464.9.1	No miss exon.	No extra exon.	9338b982-0e30-413d-9719-8a9f80623b89
B0464.9_NP1	B0464.9	8.41846	4.91077	1.75385	1.75385	271.51	102.91	31.5559	137.045	0.0477191	0.055579	0.0127976	5'missing	B0464.9.1	5 primer miss: exon 1 to 2	No extra exon.	afafdd01-c5ff-4522-addc-4d413d00e0e1
B0478.1_NP1	B0478.1	5.30688	3.98016	1.32672	0	5.30688	3.98016	1.32672	0	1	1	NA	Extra_UTR	B0478.1a.1	No miss exon.	No extra exon.	103cd36a-4c36-4fc6-b3e4-6b3206b941d2
B0491.1_NP1	B0491.1	16.1036	11.1059	2.49883	2.49883	123.169	75.2903	18.3279	29.5512	0.147508	0.13634	0.0845595	Intron_retention	B0491.1.1	Intron retention: intron 2 to 2	No extra exon.	13a300a5-7e39-4d4c-8c2c-f5e0501b9e73
B0491.1_NP1	B0491.1	8.12906	5.19357	1.35484	1.58065	123.169	75.2903	18.3279	29.5512	0.0689805	0.0739224	0.0534886	Intron_retention	B0491.1.1	Intron retention: intron 2 to 2	No extra exon.	1a411f07-2c9f-4a69-8d99-069fe77aa403
B0491.1_NP2	B0491.1	15.5682	8.64899	3.45959	3.45959	123.169	75.2903	18.3279	29.5512	0.114875	0.188761	0.117071	5'missing	B0491.1.1	5 primer miss: exon 1 to 2	No extra exon.	66843634-0054-4137-9b68-7cd00abc3d94
B0491.1_NP3	B0491.1	6.72205	3.49547	1.07553	2.15106	123.169	75.2903	18.3279	29.5512	0.0464265	0.0586825	0.0727908	Extra_UTR	B0491.1.1	No miss exon.	No extra exon.	9ecb4ca8-722e-4dd4-8e81-36ea576290a7
B0491.1_NP4	B0491.1	29.0391	14.5196	2.98932	11.5302	123.169	75.2903	18.3279	29.5512	0.192848	0.163102	0.390179	Extra_UTR	B0491.1.1	No miss exon.	No extra exon.	be0497a1-85fa-4402-8474-151c38d9f52a
B0491.1_NP5	B0491.1	15.5508	10.3672	2.30382	2.87978	123.169	75.2903	18.3279	29.5512	0.137696	0.1257	0.0974505	Extra_UTR	B0491.1.1	No miss exon.	No extra exon.	ef1d2fd6-5869-4fa3-bfaa-bc0cff48c7b2
B0491.1_NP6	B0491.1	13.9808	10.2168	1.88204	1.88204	123.169	75.2903	18.3279	29.5512	0.135698	0.102687	0.0636873	Intron_retention	B0491.1.1	Intron retention: intron 2 to 2	No extra exon.	f2d5ca7c-8c59-4e04-8cae-82b702425118
B0491.3_NP1	B0491.3	115.226	0	13.9994	101.226	187.068	0	23.1069	163.961	NA	0.605854	0.617381	5'missing	B0491.3.1	5 primer miss: exon 1 to 1	No extra exon.	5fd44b6d-4226-467f-b48a-2689979eabb3
B0491.3_NP1	B0491.3	11.0781	0	3.40865	7.66947	187.068	0	23.1069	163.961	NA	0.147517	0.0467762	5'missing	B0491.3.1	5 primer miss: exon 1 to 2	No extra exon.	773835ac-e43c-4d3f-840e-3e89d848ffa2
B0491.3_NP2	B0491.3	11.7415	0	2.02439	9.71709	187.068	0	23.1069	163.961	NA	0.08761	0.0592647	3'missing	B0491.3.1	5 primer miss: exon 1 to 1;3 primer miss: exon 4 to 4	No extra exon.	91ac1a84-9191-4782-bcdb-3b6b3818f3e2
B0491.5_NP1	B0491.5	52.816	19.9527	18.779	14.0843	633.713	217.675	115.168	300.871	0.0916629	0.163058	0.0468117	5'missing	B0491.5.3	5 primer miss: exon 1 to 1	No extra exon.	0d799922-7287-4221-86fe-beb2f56be64c
B0491.5_NP1	B0491.5	51.7594	26.2342	7.09033	18.4348	633.713	217.675	115.168	300.871	0.12052	0.0615652	0.0612717	5'missing	B0491.5.3	5 primer miss: exon 1 to 1	No extra exon.	3124566d-53cd-4fd6-a903-bfcb528e0428
B0491.5_NP2	B0491.5	6.87246	2.64326	3.17191	1.0573	633.713	217.675	115.168	300.871	0.0121431	0.0275416	0.00351414	3'missing	B0491.5.3	3 primer miss: exon 6 to 6	No extra exon.	43f87392-dbd7-456b-8ba1-a6a9a5b3083c
B0491.5_NP3	B0491.5	7.17208	4.45832	0.77536	1.9384	633.713	217.675	115.168	300.871	0.0204816	0.00673244	0.00644263	Missing_UTR	B0491.5.1	No miss exon.	No extra exon.	4b459b30-f6e3-4854-8aa0-61cfd3ff80cb
B0491.5_NP4	B0491.5	6.47287	2.94221	2.35377	1.17689	633.713	217.675	115.168	300.871	0.0135166	0.0204378	0.0039116	5'missing	B0491.5.3	5 primer miss: exon 1 to 1	No extra exon.	57111c23-1827-4097-8bc2-954e6d34051d
B0491.5_NP5	B0491.5	358.134	105.504	56.1399	196.49	633.713	217.675	115.168	300.871	0.484688	0.487463	0.653071	Extra_UTR	B0491.5.3	No miss exon.	No extra exon.	8016088d-6102-4cb6-92ce-34a32ebd632e
B0491.5_NP6	B0491.5	26.8783	12.364	2.68783	11.8264	633.713	217.675	115.168	300.871	0.0568003	0.0233384	0.0393074	5'missing	B0491.5.3	5 primer miss: exon 1 to 2	No extra exon.	a1d3b175-7c81-48ea-b1e5-99405aaa8e97
B0491.5_NP7	B0491.5	5.25092	3.50061	0.777913	0.972392	633.713	217.675	115.168	300.871	0.0160818	0.00675462	0.00323193	Missing_UTR	B0491.5.1	No miss exon.	No extra exon.	aa03efff-79e1-4675-8c34-3ff180ea875b
B0491.6_NP1	B0491.6	24.3833	14.9625	0.554165	8.86664	152.139	86.8685	11.0809	54.1897	0.172243	0.0500109	0.163622	5'missing	B0491.6a.1	5 primer miss: exon 1 to 1	No extra exon.	2325bb4a-b95c-44a0-a133-a9bbe1e7e49d
B0491.6_NP1	B0491.6	15.4269	8.99902	0.85705	5.57082	152.139	86.8685	11.0809	54.1897	0.103594	0.0773449	0.102802	Extra_UTR	B0491.6a.1	No miss exon.	No extra exon.	980436e2-e10c-471b-831f-a30fa2f85f9d
B0491.6_NP2	B0491.6	49.4794	25.5553	5.4373	18.4868	152.139	86.8685	11.0809	54.1897	0.294184	0.490692	0.34115	Extra_UTR	B0491.6a.1	No miss exon.	No extra exon.	dae7a4c4-0cd7-4d60-aa29-c8222f5b7a00
B0491.6_NP3	B0491.6	5.14481	3.62042	0.190548	1.33384	152.139	86.8685	11.0809	54.1897	0.041677	0.0171961	0.0246143	3'missing	B0491.6a.1	3 primer miss: exon 6 to 6	No extra exon.	e6335a1c-11a6-4383-83ab-afb1a09dceb5
B0491.7_NP1	B0491.7	8.12037	5.58276	2.03009	0.507523	42.1845	21.594	9.78876	10.8017	0.258532	0.20739	0.0469856	5'missing	B0491.7.1	5 primer miss: exon 1 to 1	No extra exon.	1ec97a22-8712-4f73-966d-9bfe6c0e6daf
B0491.8_NP1	B0491.8	9.72929	0.748407	8.23247	0.748407	21.2275	0.748407	19.1656	1.31349	1	0.429543	0.569784	Intron_retention	B0491.8c.1	Intron retention: intron 8 to 8	No extra exon.	50f2cb65-5df0-454b-a312-846c36551bbe
B0491.8_NP1	B0491.8	5.08576	0	4.52068	0.565085	21.2275	0.748407	19.1656	1.31349	0	0.235874	0.430216	5'missing	B0491.8c.1	5 primer miss: exon 1 to 4	No extra exon.	79a53744-2b46-453f-aaae-8bcc42376d32
B0495.10_NP1	B0495.10	11.6251	4.89479	6.42441	0.305924	130.019	55.9207	55.2325	18.8655	0.087531	0.116316	0.0162161	5'extra	B0495.10a.2	5 primer miss: exon 1 to 1	5 primer extra: exon 1 to 1	504b024a-46ba-4482-b0e3-d0bce96ff300
B0495.10_NP1	B0495.10	6.09713	2.23561	3.45504	0.406475	130.019	55.9207	55.2325	18.8655	0.0399783	0.0625544	0.021546	5'missing	B0495.10a.2	5 primer miss: exon 1 to 2	No extra exon.	510e960e-c9d5-4e87-b472-ec76e5f0a5b1
B0495.10_NP2	B0495.10	7.07953	2.74046	4.1107	0.228372	130.019	55.9207	55.2325	18.8655	0.0490063	0.0744253	0.0121053	5'extra	B0495.10a.2	5 primer miss: exon 1 to 1	5 primer extra: exon 1 to 1	51d62ba4-abbc-493a-b5e0-74fa34151bb3
B0495.10_NP3	B0495.10	14.5939	5.83757	1.45939	7.29697	130.019	55.9207	55.2325	18.8655	0.10439	0.0264227	0.386789	Intron_retention	B0495.10a.2	Intron retention: intron 7 to 7	No extra exon.	81e9b741-7e7d-4fb7-a593-64f0ccba5022
B0495.10_NP4	B0495.10	7.40173	2.66462	4.14497	0.592139	130.019	55.9207	55.2325	18.8655	0.0476501	0.0750459	0.0313874	5'missing	B0495.10a.2	5 primer miss: exon 1 to 3	No extra exon.	941614ef-b2ea-4f44-a779-fc3e0e3bb404
B0495.10_NP5	B0495.10	14.5939	5.83757	1.45939	7.29697	130.019	55.9207	55.2325	18.8655	0.10439	0.0264227	0.386789	Intron_retention	B0495.10a.2	Intron retention: intron 9 to 9	No extra exon.	9ca6e285-a337-4d67-88ba-b066cb72b685
B0495.10_NP6	B0495.10	5.65489	2.14496	3.11994	0.389992	130.019	55.9207	55.2325	18.8655	0.0383571	0.0564873	0.0206722	5'missing	B0495.10a.2	5 primer miss: exon 1 to 2	No extra exon.	a2330d25-f839-4412-89e0-1bebe725837c
B0495.10_NP7	B0495.10	8.04298	3.6559	4.14335	0.243727	130.019	55.9207	55.2325	18.8655	0.0653766	0.0750166	0.0129192	5'extra	B0495.10a.2	5 primer miss: exon 1 to 1	5 primer extra: exon 1 to 1	a7294fbd-1fd3-4f10-975b-25ae29b08634
B0495.2_NP1	B0495.2	21.6241	8.40937	3.00335	10.2114	212.542	65.1599	24.9559	122.426	0.129058	0.120346	0.0834083	5'missing	B0495.2a.1	5 primer miss: exon 1 to 1	No extra exon.	229432a3-8c2f-4ca8-ae7a-4cb46df6edf6
B0495.2_NP1	B0495.2	10.4354	3.33045	1.33218	5.77278	212.542	65.1599	24.9559	122.426	0.051112	0.0533813	0.0471531	5'missing	B0495.2a.1	5 primer miss: exon 1 to 4	No extra exon.	58d6f7c9-37ed-482b-8fe5-72a3dd88bbad
B0495.2_NP2	B0495.2	9.37403	3.40874	1.02262	4.94267	212.542	65.1599	24.9559	122.426	0.0523135	0.0409771	0.0403726	Intron_retention	B0495.2a.1	Intron retention: intron 6 to 6	No extra exon.	5e0e0ea7-10d1-45bb-91e0-5fdbf72b228c
B0495.2_NP3	B0495.2	24.5318	7.58256	3.56827	13.381	212.542	65.1599	24.9559	122.426	0.116369	0.142983	0.109298	5'missing	B0495.2a.1	5 primer miss: exon 1 to 1	No extra exon.	7ed8ce94-98de-4f31-8c8e-08ea0226bb37
B0495.2_NP4	B0495.2	5.00892	1.87835	0.626115	2.50446	212.542	65.1599	24.9559	122.426	0.0288267	0.0250889	0.0204569	3'missing	B0495.2a.1	3 primer miss: exon 10 to 10	No extra exon.	c0c0a6c2-b1e9-416a-9e49-fc97cefa5efc
B0495.2_NP5	B0495.2	66.0692	19.482	7.62337	38.9639	212.542	65.1599	24.9559	122.426	0.298987	0.305474	0.318264	Extra_UTR	B0495.2a.1	No miss exon.	No extra exon.	d8e37208-2c26-4df3-801b-1079f49ba209
B0495.4_NP1	B0495.4	6.2577	2.0859	1.04295	3.12885	180.368	59.2434	34.0053	87.119	0.035209	0.0306702	0.0359147	5'missing	B0495.4.1	5 primer miss: exon 1 to 1	No extra exon.	50d0e5ee-5778-4239-a935-3e096823ff9a
B0495.4_NP1	B0495.4	56.2972	17.6235	10.7699	27.9038	180.368	59.2434	34.0053	87.119	0.297475	0.316712	0.320296	Missing_UTR	B0495.4.1	No miss exon.	No extra exon.	657f30e9-3145-4563-a156-458faa5e4bd2
B0495.4_NP2	B0495.4	53.29	16.8284	10.097	26.3645	180.368	59.2434	34.0053	87.119	0.284055	0.296926	0.302626	New_junction	NA	NA	NA	7cbefd9d-0d62-4087-92b7-47d27c808fd6
B0495.4_NP3	B0495.4	12.8913	4.00075	1.77811	7.11244	180.368	59.2434	34.0053	87.119	0.0675307	0.0522892	0.0816406	5'missing	B0495.4.1	5 primer miss: exon 1 to 1	No extra exon.	94d46125-9fba-49b1-9f23-14ea79fe7057
B0495.5_NP1	B0495.5	28.0405	9.73628	14.7991	3.50506	138.931	48.8867	70.8277	19.2161	0.19916	0.208946	0.182402	5'missing	B0495.5.1	5 primer miss: exon 1 to 2	No extra exon.	30e0490e-600f-4cef-9d84-6410b4bff013
B0495.5_NP1	B0495.5	5.25878	2.62939	1.75293	0.876464	138.931	48.8867	70.8277	19.2161	0.0537854	0.0247492	0.0456108	5'missing	B0495.5.1	5 primer miss: exon 1 to 4	No extra exon.	400c3254-3b00-4e52-83c5-b71d1fe427a4
B0495.5_NP2	B0495.5	25.387	8.46235	13.9813	2.94342	138.931	48.8867	70.8277	19.2161	0.173101	0.197398	0.153175	Intron_retention	B0495.5.1	5 primer miss: exon 1 to 1;Intron retention: intron 5 to 5	No extra exon.	482b2622-a7fc-45e7-bded-ee6c4710f8b3
B0495.5_NP3	B0495.5	50.8159	16.1471	26.1203	8.54846	138.931	48.8867	70.8277	19.2161	0.330296	0.368787	0.444859	Extra_UTR	B0495.5.1	No miss exon.	No extra exon.	49bfff7a-e8c0-491e-827a-e04bf3b931ff
B0495.5_NP4	B0495.5	6.81294	2.8824	3.40647	0.524072	138.931	48.8867	70.8277	19.2161	0.0589608	0.0480952	0.0272725	Intron_retention	B0495.5.1	5 primer miss: exon 1 to 2;Intron retention: intron 5 to 5	No extra exon.	ee79bd12-4054-45f9-b245-061fe7ef7cd8
B0495.6_NP1	B0495.6	122.891	49.0437	14.6568	59.1907	293.699	118.779	37.4285	137.492	0.4129	0.391593	0.430503	Extra_UTR	B0495.6.1	No miss exon.	No extra exon.	02670b06-6c8a-473a-9e97-abeb1125fae0
B0495.6_NP1	B0495.6	72.3653	28.7663	9.43895	34.16	293.699	118.779	37.4285	137.492	0.242184	0.252186	0.248451	Missing_UTR	B0495.6.1	No miss exon.	No extra exon.	13ba28d9-5d2e-4305-adcb-212aabbdfe6c
B0495.7_NP1	B0495.7	19.9741	11.4703	4.54855	3.95526	395.85	195.964	80.4787	119.407	0.0585323	0.0565187	0.0331242	5'missing	B0495.7.3	5 primer miss: exon 1 to 1	No extra exon.	038ca609-2422-4694-957e-d2d8eb147089
B0495.7_NP1	B0495.7	15.3305	7.90234	3.47703	3.95117	395.85	195.964	80.4787	119.407	0.0403254	0.0432044	0.0330899	Intron_retention	B0495.7.3	Intron retention: intron 2 to 2	No extra exon.	0c55f9c4-2dcc-4424-93ad-bbeac7c5f079
B0495.7_NP2	B0495.7	21.2166	12.1553	4.86213	4.19911	395.85	195.964	80.4787	119.407	0.0620282	0.0604151	0.0351663	Extra_UTR	B0495.7.3	No miss exon.	No extra exon.	0d549f24-24ed-4930-98e8-5527b2cc11fe
B0495.7_NP3	B0495.7	30.8906	15.8951	5.69826	9.29716	395.85	195.964	80.4787	119.407	0.0811124	0.0708046	0.077861	Intron_retention	B0495.7.3	Intron retention: intron 4 to 4	No extra exon.	2db3e294-6cf1-470b-9470-f35648662927
B0495.7_NP4	B0495.7	14.3687	7.41121	3.32748	3.62998	395.85	195.964	80.4787	119.407	0.0378192	0.0413461	0.0304	Intron_retention	B0495.7.3	Intron retention: intron 3 to 3	No extra exon.	5393315d-32e1-4d23-bf76-b070f3586496
B0495.7_NP5	B0495.7	7.48868	4.18199	1.55609	1.7506	395.85	195.964	80.4787	119.407	0.0213405	0.0193354	0.0146608	New_junction	NA	NA	NA	670ff4ec-e02f-415e-95be-72d89e1e2300
B0495.7_NP6	B0495.7	5.50086	3.0166	1.33085	1.15341	395.85	195.964	80.4787	119.407	0.0153936	0.0165367	0.00965945	New_junction	NA	NA	NA	78d6e4d8-a95b-49cf-b482-4247429aab09
B0495.7_NP7	B0495.7	28.7241	15.4668	6.07625	7.18103	395.85	195.964	80.4787	119.407	0.0789267	0.0755014	0.060139	5'missing	B0495.7.3	5 primer miss: exon 1 to 1	No extra exon.	7bb2d74f-339d-4704-b426-0f875414de1f
B0495.7_NP8	B0495.7	9.02178	4.70149	1.90601	2.41428	395.85	195.964	80.4787	119.407	0.0239915	0.0236834	0.0202189	Intron_retention	B0495.7.3	Intron retention: intron 5 to 5	No extra exon.	8ae9d282-1871-497a-aaa0-94806c73bd23
B0495.7_NP9	B0495.7	6.94219	3.90498	1.38844	1.64877	395.85	195.964	80.4787	119.407	0.019927	0.0172523	0.013808	Intron_retention	B0495.7.3	5 primer miss: exon 1 to 2;Intron retention: intron 4 to 4	No extra exon.	93316352-01cf-46ba-a548-bf7de6449c98
B0495.7_NP10	B0495.7	7.13173	3.96207	1.49678	1.67287	395.85	195.964	80.4787	119.407	0.0202183	0.0185985	0.0140098	New_junction	B0495.7.3	No miss exon.	Intron extra: intron 3 to 3	a76cae88-e9e3-42ae-8eb9-2bca44d64962
B0495.7_NP11	B0495.7	7.13173	3.96207	1.49678	1.67287	395.85	195.964	80.4787	119.407	0.0202183	0.0185985	0.0140098	5'missing	B0495.7.3	5 primer miss: exon 1 to 2	No extra exon.	ddd49a8e-5e52-4da3-9cf2-97bcb21e0913
B0495.8_NP1	B0495.8	20.6111	13.7407	2.74815	4.12222	292.937	151.819	27.3883	113.73	0.0905074	0.10034	0.0362457	5'missing	B0495.8a.1	5 primer miss: exon 1 to 1	No extra exon.	05fffad0-da99-4ae3-af35-98ddb5d554ff
B0495.8_NP1	B0495.8	12.6508	9.09276	1.97669	1.58135	292.937	151.819	27.3883	113.73	0.0598921	0.0721727	0.0139044	New_junction	NA	NA	NA	416624bc-4653-4022-ba4d-1412440b06c6
B0495.8_NP2	B0495.8	7.67559	4.60535	1.9189	1.15134	292.937	151.819	27.3883	113.73	0.0303345	0.0700627	0.0101234	5'missing	B0495.8a.1	5 primer miss: exon 1 to 5	No extra exon.	87e1e6fe-56ee-44f9-ab41-33745d44451a
B0495.8_NP3	B0495.8	12.8719	7.6427	1.60899	3.62022	292.937	151.819	27.3883	113.73	0.0503408	0.0587474	0.0318318	Intron_retention	B0495.8a.1	Intron retention: intron 5 to 5	No extra exon.	9f99a380-d162-4a8c-bf3a-728b2744d232
B0495.8_NP4	B0495.8	163.697	74.4078	10.6297	78.6597	292.937	151.819	27.3883	113.73	0.490108	0.388111	0.691635	Extra_UTR	B0495.8a.1	No miss exon.	No extra exon.	c48745f0-6fe7-4734-8457-a994fb455217
B0495.8_NP5	B0495.8	11.3241	8.03644	1.82646	1.46117	292.937	151.819	27.3883	113.73	0.0529343	0.0666878	0.0128477	3'missing	B0495.8a.1	3 primer miss: exon 8 to 8	No extra exon.	f5914491-a859-4596-a7cd-549175c1ddd4
B0495.8_NP6	B0495.8	5.57495	3.34497	0.891991	1.33799	292.937	151.819	27.3883	113.73	0.0220326	0.0325684	0.0117646	Intron_retention	B0495.8a.1	Intron retention: intron 6 to 6	No extra exon.	ffca6f90-5862-408b-9295-f6933603da60
B0495.9_NP1	B0495.9	6.78325	3.87614	2.42259	0.484518	333.251	99.7017	94.8437	138.705	0.0388774	0.025543	0.00349315	3'missing	B0495.9.1	5 primer miss: exon 1 to 1;3 primer miss: exon 5 to 5	No extra exon.	57bf17d5-f629-4593-b22d-b9181fe5643d
B0495.9_NP1	B0495.9	26.0981	11.8063	8.69936	5.59245	333.251	99.7017	94.8437	138.705	0.118416	0.0917232	0.0403189	5'extra	B0495.9.1	No miss exon.	5 primer extra: exon 1 to 1	6064e880-56f8-4a82-8f43-07ec7ffedb4a
B0495.9_NP2	B0495.9	19.2434	8.84155	6.76118	3.64064	333.251	99.7017	94.8437	138.705	0.08868	0.0712877	0.0262473	5'missing	B0495.9.1	5 primer miss: exon 1 to 1	No extra exon.	61765b9b-5cd6-4073-a001-a915f691d26b
B0495.9_NP3	B0495.9	36.0432	14.7115	13.9759	7.35576	333.251	99.7017	94.8437	138.705	0.147555	0.147358	0.0530316	3'missing	B0495.9.1	3 primer miss: exon 5 to 5	No extra exon.	86a235d8-b7e3-4c99-8efc-26918bb2ab85
B0495.9_NP4	B0495.9	7.11967	4.15314	2.07657	0.889958	333.251	99.7017	94.8437	138.705	0.0416556	0.0218947	0.00641618	3'missing	B0495.9.1	5 primer miss: exon 1 to 1;3 primer miss: exon 4 to 5	No extra exon.	8e8e08e2-84fc-4480-96ec-89b8e75329a1
B0495.9_NP5	B0495.9	8.70699	4.74927	2.37463	1.58309	333.251	99.7017	94.8437	138.705	0.0476348	0.0250374	0.0114133	Missing_UTR	B0495.9.1	No miss exon.	No extra exon.	a2a576c6-3564-4571-b422-c13c58d93de7
B0496.7_NP1	B0496.7	5.4743	4.44787	0.684288	0.342144	105.196	66.7371	18.044	20.4153	0.0666476	0.0379234	0.0167592	Missing_UTR	B0496.7.1	No miss exon.	No extra exon.	2bf90de0-c8cd-4d00-84e6-ad27b8bb1123
B0496.7_NP1	B0496.7	42.6225	26.858	7.00644	8.75805	105.196	66.7371	18.044	20.4153	0.402445	0.388298	0.428995	Missing_UTR	B0496.7.1	No miss exon.	No extra exon.	37adf8d2-c418-4879-a2a3-c5150bb75a3a
B0496.7_NP2	B0496.7	49.9195	29.9517	8.65271	11.3151	105.196	66.7371	18.044	20.4153	0.448801	0.479535	0.554246	Missing_UTR	B0496.7.1	No miss exon.	No extra exon.	547b7856-7856-45f1-87fa-b8be05631ac4
B0496.8_NP1	B0496.8	8.49101	4.24551	4.24551	0	89.7969	53.4468	25.4926	10.8574	0.0794342	0.166539	0	3'missing	B0496.8.1	3 primer miss: exon 5 to 5	No extra exon.	4c4b1488-6618-43b5-8dbe-695df5c8ee57
B0496.8_NP1	B0496.8	48.8454	28.9761	12.4183	7.451	89.7969	53.4468	25.4926	10.8574	0.542148	0.487135	0.686257	Extra_UTR	B0496.8.1	No miss exon.	No extra exon.	89d4197d-dcaa-4e65-80a1-18a3140d8e25
B0507.1_NP1	B0507.1	6.52304	6.52304	0	0	11.3877	11.3877	0	0	0.572816	NA	NA	Fusion_gene	B0507.1.1	5 primer miss: exon 1 to 1	No extra exon.	c11eb100-0b11-4022-865b-91d754d5400e
B0507.10_NP1	B0507.10	8.29201	1.18457	4.73829	2.36914	11.9405	1.18457	6.72837	4.02755	1	0.704225	0.588235	Extra_UTR	B0507.10.1	No miss exon.	No extra exon.	0353b39d-ab0c-4036-9160-71ac25433678
B0507.2_NP1	B0507.2	244.78	77.7264	110.209	56.8447	294.532	95.818	135.839	62.8752	0.811187	0.811322	0.904087	3'extra	B0507.2.1	5 primer miss: exon 1 to 2	3 primer extra: exon 3 to 7	dc383c33-6244-452a-961b-2f697b1e3c91
B0511.1_NP1	B0511.1	8.94489	7.89255	0.52617	0.52617	171.147	150.746	15.0351	5.36586	0.0523566	0.034996	0.0980587	Extra_UTR	B0511.1.1	No miss exon.	No extra exon.	37931680-cf9b-4bd4-9bb0-c502e9f1c04f
B0511.1_NP1	B0511.1	105.23	97.0455	7.01534	1.16922	171.147	150.746	15.0351	5.36586	0.643768	0.466596	0.2179	5'missing	B0511.1.1	5 primer miss: exon 1 to 1	No extra exon.	701a55db-24c5-42d7-b26b-e0c8df4eab31
B0511.1_NP2	B0511.1	11.6299	9.30393	1.55066	0.775328	171.147	150.746	15.0351	5.36586	0.0617193	0.103135	0.144493	Extra_UTR	B0511.1.1	No miss exon.	No extra exon.	8bf4d2b7-1bed-42d0-ab03-7a73a1354a09
B0511.1_NP3	B0511.1	6.98898	6.98898	0	0	171.147	150.746	15.0351	5.36586	0.0463626	0	0	Intron_retention	B0511.1.1	5 primer miss: exon 1 to 1;Intron retention: intron 3 to 3	No extra exon.	9dd99ddf-afcd-4794-b9c4-75fcc455954c
B0511.1_NP4	B0511.1	14.5392	10.7464	3.1607	0.63214	171.147	150.746	15.0351	5.36586	0.071288	0.210221	0.117808	5'missing	B0511.1.1	5 primer miss: exon 1 to 1	No extra exon.	b9107878-b51a-4748-933e-8dd68bc26ba8
B0511.10_NP1	B0511.10	14.8283	3.81941	2.02204	8.98684	304.275	85.637	43.6821	174.956	0.0446	0.0462899	0.0513664	5'missing	B0511.10.1	5 primer miss: exon 1 to 2	No extra exon.	1a128779-589c-43fb-b39f-b07a5df7852b
B0511.10_NP1	B0511.10	14.0323	4.46481	1.91349	7.65396	304.275	85.637	43.6821	174.956	0.0521364	0.0438049	0.043748	5'missing	B0511.10.1	5 primer miss: exon 1 to 1	No extra exon.	332216c1-95ab-4c4c-9751-4adb0351181b
B0511.10_NP2	B0511.10	16.3319	4.40702	2.8516	9.07328	304.275	85.637	43.6821	174.956	0.0514617	0.0652808	0.0518604	Intron_retention	B0511.10.1	Intron retention: intron 2 to 2	No extra exon.	9ba73b89-2e75-4b26-a203-952e173daadd
B0511.10_NP3	B0511.10	6.89956	1.76912	1.06147	4.06897	304.275	85.637	43.6821	174.956	0.0206583	0.0242999	0.0232571	5'missing	B0511.10.1	5 primer miss: exon 1 to 2	No extra exon.	a155c68e-4c21-4f41-adc9-abd37f754a09
B0511.10_NP4	B0511.10	100.756	30.2925	13.1707	57.2924	304.275	85.637	43.6821	174.956	0.353732	0.301512	0.327468	Missing_UTR	B0511.10.1	No miss exon.	No extra exon.	c0eb1b88-0896-4504-935e-e36a4c2f6422
B0511.10_NP5	B0511.10	71.762	17.9405	8.97025	44.8512	304.275	85.637	43.6821	174.956	0.209495	0.205353	0.256358	5'missing	B0511.10.1	5 primer miss: exon 1 to 1	No extra exon.	cc5dc117-c4e2-48bd-b5cd-80c85225d3e6
B0511.10_NP6	B0511.10	41.7165	11.1922	7.46149	23.0628	304.275	85.637	43.6821	174.956	0.130694	0.170813	0.131821	Extra_UTR	B0511.10.1	No miss exon.	No extra exon.	ff3656d4-8460-4388-9f59-ec89eb14cff0
B0511.11_NP1	B0511.11	10.1715	1.13017	2.26034	6.78102	14.5939	2.34633	4.47154	7.77606	0.481675	0.505495	0.872038	5'extra	B0511.11.1	No miss exon.	5 primer extra: exon 1 to 1	282656e8-4d55-4ea4-ba85-46c24792e374
B0511.12_NP1	B0511.12	19.9008	5.97024	3.98016	9.95041	199.45	92.9606	53.204	53.2858	0.0642234	0.0748095	0.186737	New_junction	NA	NA	NA	27f27c0f-83bb-4246-be00-0ef5fdce2c3a
B0511.12_NP1	B0511.12	36.9247	17.3601	9.36897	10.1956	199.45	92.9606	53.204	53.2858	0.186747	0.176095	0.191339	Intron_retention	B0511.12a.1	Intron retention: intron 4 to 4;Intron retention: intron 10 to 10	No extra exon.	34cbf763-36a6-4c56-8fed-d4d04d800f0e
B0511.12_NP2	B0511.12	8.02434	3.96383	2.41697	1.64354	199.45	92.9606	53.204	53.2858	0.0426399	0.0454284	0.0308439	New_junction	NA	NA	NA	48d4154b-0eba-4c7a-b466-66ec0aa51e69
B0511.12_NP3	B0511.12	20.5619	10.9293	5.18677	4.44581	199.45	92.9606	53.204	53.2858	0.117569	0.0974884	0.0834333	Intron_retention	B0511.12b.1	Intron retention: intron 2 to 3	Intron extra: intron 2 to 2	68bdbb91-2c06-4f58-8805-bbaaf548c137
B0511.12_NP4	B0511.12	19.2351	10.1422	4.89622	4.19676	199.45	92.9606	53.204	53.2858	0.109102	0.0920272	0.0787594	5'missing	B0511.12a.1	5 primer miss: exon 1 to 3	No extra exon.	7025f3a2-94af-4aa4-8d49-1efe930f938d
B0511.12_NP5	B0511.12	6.4765	3.15303	2.04521	1.27826	199.45	92.9606	53.204	53.2858	0.0339179	0.0384409	0.0239887	Intron_retention	B0511.12a.1	5 primer miss: exon 1 to 16;Intron retention: intron 19 to 19	No extra exon.	be725597-143e-4e12-aff6-6a21eabcae62
B0511.12_NP6	B0511.12	11.12	5.56001	3.07575	2.48426	199.45	92.9606	53.204	53.2858	0.0598104	0.0578105	0.0466215	5'extra	B0511.12a.1	5 primer miss: exon 1 to 12	5 primer extra: exon 1 to 1	d1f22057-ec7c-4b14-ab3e-c8b66dc69531
B0511.12_NP7	B0511.12	10.6778	5.28148	2.98519	2.41111	199.45	92.9606	53.204	53.2858	0.0568142	0.0561083	0.0452487	New_junction	NA	NA	NA	e416f337-0d38-47ae-aae1-7af0c280221f
B0511.13_NP1	B0511.13	20.9401	11.3425	2.61751	6.98003	57.049	36.6828	5.66107	14.7052	0.309206	0.46237	0.474665	Extra_UTR	B0511.13b.1	No miss exon.	No extra exon.	56edfb62-726a-4e63-bb9c-57db1eaa58b1
B0511.13_NP1	B0511.13	7.78343	6.11555	0.555959	1.11192	57.049	36.6828	5.66107	14.7052	0.166715	0.0982074	0.0756142	Intron_retention	B0511.13b.1	Intron retention: intron 2 to 3	No extra exon.	8389dc24-b343-4554-8d2d-34b70cd56f82
B0511.13_NP2	B0511.13	12.4933	8.32886	0.694072	3.47036	57.049	36.6828	5.66107	14.7052	0.227051	0.122604	0.235996	Intron_retention	B0511.13b.1	Intron retention: intron 2 to 2	No extra exon.	88da7d49-3c1f-4c51-bd53-dd5d6d7cd508
B0511.19_NP1	B0511.19	162.744	55.8251	17.0314	89.8879	222.005	78.8708	20.9821	122.152	0.707805	0.811712	0.735871	Extra_UTR	B0511.19.1	No miss exon.	No extra exon.	dcba18ac-89ed-433e-8743-4d376de6f5f6
B0511.4_NP1	B0511.4	9.28705	0	1.16088	8.12617	10.6138	0	1.16088	9.45289	NA	1	0.859649	Missing_UTR	B0511.4.1	No miss exon.	No extra exon.	d8d48942-8045-46d3-aedd-6d2cd9f820be
B0511.6_NP1	B0511.6	6.28541	1.89238	3.1765	1.21653	1435.97	433.548	769.341	233.083	0.00436487	0.00412886	0.0052193	5'extra	B0511.6.1	5 primer miss: exon 1 to 1	5 primer extra: exon 1 to 1	063a489e-574a-4ba1-8c96-ed572757ed47
B0511.6_NP1	B0511.6	5.95373	1.812	3.04158	1.10015	1435.97	433.548	769.341	233.083	0.00417948	0.00395349	0.00471997	New_junction	NA	NA	NA	0b2c8eee-4cad-498a-a57c-a23392eb7e17
B0511.6_NP2	B0511.6	5.95373	1.812	3.04158	1.10015	1435.97	433.548	769.341	233.083	0.00417948	0.00395349	0.00471997	5'extra	B0511.6.1	5 primer miss: exon 1 to 1	5 primer extra: exon 1 to 1	134d51b1-3aa1-4ad8-bf56-9eb31b095a00
B0511.6_NP3	B0511.6	13.3098	4.85416	6.49832	1.95732	1435.97	433.548	769.341	233.083	0.0111964	0.0084466	0.00839754	Fusion_gene	W06D4.4.1	3 primer miss: exon 9 to 9	No extra exon.	25c4053d-f788-4a5a-98aa-90dd8ab5d5a4
B0511.6_NP4	B0511.6	631.364	180.207	330.38	120.777	1435.97	433.548	769.341	233.083	0.415656	0.429432	0.518172	Extra_UTR	B0511.6.1	No miss exon.	No extra exon.	25ea3e5e-f79f-4451-82fc-a35ad7c1baf1
B0511.6_NP5	B0511.6	54.4382	19.8699	27.7635	6.80477	1435.97	433.548	769.341	233.083	0.0458309	0.0360873	0.0291946	3'missing	B0511.6.1	3 primer miss: exon 6 to 6	No extra exon.	2d14fe88-4a15-4b86-a31f-e41c8d34db9f
B0511.6_NP6	B0511.6	5.95373	1.812	3.04158	1.10015	1435.97	433.548	769.341	233.083	0.00417948	0.00395349	0.00471997	5'extra	B0511.6.1	5 primer miss: exon 1 to 1	5 primer extra: exon 1 to 1	2df0f621-6a29-474e-9698-d92556f74377
B0511.6_NP7	B0511.6	11.2606	3.48266	5.57226	2.20569	1435.97	433.548	769.341	233.083	0.00803293	0.00724291	0.00946309	5'missing	B0511.6.1	5 primer miss: exon 1 to 1	No extra exon.	364712e1-e5f4-4805-93ef-08874a5d8e15
B0511.6_NP8	B0511.6	6.0485	1.82105	3.1218	1.10564	1435.97	433.548	769.341	233.083	0.00420035	0.00405777	0.00474354	New_junction	B0511.6.1	No miss exon.	Intron extra: intron 2 to 2	4a1cc339-958e-4355-8381-1b9d9f9137e4
B0511.6_NP9	B0511.6	12.4253	4.64078	5.91326	1.87128	1435.97	433.548	769.341	233.083	0.0107042	0.00768613	0.0080284	3'missing	B0511.6.1	3 primer miss: exon 4 to 6	No extra exon.	4aab2d7c-b615-4efb-a53e-fd7ae8d5cbb6
B0511.6_NP10	B0511.6	139.93	46.1131	79.1874	14.629	1435.97	433.548	769.341	233.083	0.106362	0.102929	0.062763	Intron_retention	B0511.6.1	Intron retention: intron 2 to 2	Intron extra: intron 2 to 2	59da5844-549b-4b0e-9eab-aa9426ba3308
B0511.6_NP11	B0511.6	15.4607	5.43673	7.8153	2.20867	1435.97	433.548	769.341	233.083	0.0125401	0.0101584	0.0094759	3'extra	B0511.6.1	No miss exon.	3 primer extra: exon 7 to 7	6e6dee4e-1ba7-48a8-a36e-1f996f74faed
B0511.6_NP12	B0511.6	19.7457	7.28584	9.39768	3.06217	1435.97	433.548	769.341	233.083	0.0168051	0.0122152	0.0131377	5'missing	B0511.6.1	5 primer miss: exon 1 to 1	No extra exon.	83245e93-fa27-4855-81cb-605e81a95343
B0511.6_NP13	B0511.6	18.3687	6.58878	9.08453	2.69541	1435.97	433.548	769.341	233.083	0.0151973	0.0118082	0.0115642	3'missing	B0511.6.1	3 primer miss: exon 4 to 6	No extra exon.	8d31911c-ecfc-4e22-9c65-aa018d4509c5
B0511.6_NP14	B0511.6	15.6047	5.69835	7.45169	2.45467	1435.97	433.548	769.341	233.083	0.0131435	0.00968581	0.0105313	Intron_retention	B0511.6.1	Intron retention: intron 3 to 3	No extra exon.	98336f94-65a1-4475-82f2-b4c2427e89be
B0511.6_NP15	B0511.6	52.227	18.9424	26.5194	6.76515	1435.97	433.548	769.341	233.083	0.0436916	0.0344703	0.0290246	3'missing	B0511.6.1	3 primer miss: exon 5 to 6	No extra exon.	9b7e889c-4daf-41c0-a9a8-47c22aa13760
B0511.6_NP16	B0511.6	12.6859	4.75722	6.04092	1.88779	1435.97	433.548	769.341	233.083	0.0109728	0.00785207	0.0080992	Intron_retention	B0511.6.1	Intron retention: intron 3 to 3	Intron extra: intron 3 to 3	9ce8b547-c645-4916-9da8-05ee6205c375
B0511.6_NP17	B0511.6	12.4253	4.64078	5.91326	1.87128	1435.97	433.548	769.341	233.083	0.0107042	0.00768613	0.0080284	3'missing	B0511.6.1	3 primer miss: exon 5 to 6	Intron extra: intron 2 to 2	a3718384-0b70-4f48-87c8-495942e9679d
B0511.6_NP18	B0511.6	12.6464	4.77081	5.98245	1.89318	1435.97	433.548	769.341	233.083	0.0110041	0.00777607	0.00812234	Intron_retention	B0511.6.1	Intron retention: intron 3 to 3	No extra exon.	b83f5c27-fb4e-437e-98e4-162c61d9aebd
B0511.6_NP19	B0511.6	12.4253	4.64078	5.91326	1.87128	1435.97	433.548	769.341	233.083	0.0107042	0.00768613	0.0080284	New_junction	NA	NA	NA	e682aae8-871f-41ae-aa3d-5758506b31ee
B0511.6_NP20	B0511.6	5.95373	1.812	3.04158	1.10015	1435.97	433.548	769.341	233.083	0.00417948	0.00395349	0.00471997	Fusion_gene	B0511.6.1	5 primer miss: exon 1 to 1	5 primer extra: exon 1 to 1	f30c9ea3-a18b-49e7-8042-31bb5f8fde11
B0511.7_NP1	B0511.7	8.28628	4.92698	1.11977	2.23954	325.432	156.458	32.6723	136.303	0.0314908	0.0342727	0.0164306	Intron_retention	B0511.7.1	Intron retention: intron 3 to 3	No extra exon.	4197b2de-b821-4ad3-b338-48c37796e273
B0511.7_NP1	B0511.7	72.0242	34.5998	5.64895	31.7754	325.432	156.458	32.6723	136.303	0.221145	0.172897	0.233124	5'missing	B0511.7.1	5 primer miss: exon 1 to 1	No extra exon.	56892c20-c957-4f44-8635-ac7d05bfe7d2
B0511.7_NP2	B0511.7	73.7931	34.4131	7.09549	32.2845	325.432	156.458	32.6723	136.303	0.219952	0.217171	0.236859	Extra_UTR	B0511.7.1	No miss exon.	No extra exon.	7d05aaf3-8c15-4f9f-9e57-0143edc62455
B0511.7_NP3	B0511.7	14.0544	8.17114	1.96107	3.92215	325.432	156.458	32.6723	136.303	0.0522259	0.0600225	0.0287753	5'missing	B0511.7.1	5 primer miss: exon 1 to 1	No extra exon.	af2f54c7-a6b3-45c9-ba03-687c90048f3f
B0511.7_NP4	B0511.7	73.3698	34.2157	7.05479	32.0993	325.432	156.458	32.6723	136.303	0.21869	0.215926	0.2355	Extra_UTR	B0511.7.1	No miss exon.	No extra exon.	ebcea6b3-f9b3-4a94-973e-751b6aac104e
B0511.8_NP1	B0511.8	18.17	6.05668	3.5065	8.60686	301.901	97.5472	62.1364	142.218	0.0620897	0.0564323	0.0605189	Extra_UTR	B0511.8.2	No miss exon.	No extra exon.	01f3508d-febc-444d-9799-91c0806070fb
B0511.8_NP1	B0511.8	6.45068	1.73672	0.992412	3.72155	301.901	97.5472	62.1364	142.218	0.0178039	0.0159715	0.0261679	3'missing	B0511.8.2	3 primer miss: exon 3 to 4	No extra exon.	1e8ea97b-fbd9-4be0-af12-a6b4b00c364d
B0511.8_NP2	B0511.8	101.753	31.7669	21.8398	48.1468	301.901	97.5472	62.1364	142.218	0.325657	0.351481	0.338543	Extra_UTR	B0511.8.2	No miss exon.	No extra exon.	3e115ada-7d20-4c77-ab25-ebe8aef5cb94
B0511.8_NP3	B0511.8	12.8632	4.20022	2.62514	6.03781	301.901	97.5472	62.1364	142.218	0.0430583	0.0422479	0.0424547	5'extra	B0511.8.2	No miss exon.	5 primer extra: exon 1 to 2	9f9e554f-21fc-49a0-9744-144a0879e4a8
B0511.8_NP4	B0511.8	30	11.1765	5.29411	13.5294	301.901	97.5472	62.1364	142.218	0.114575	0.0852015	0.0951316	3'missing	B0511.8.2	3 primer miss: exon 4 to 4	No extra exon.	e7805856-f4cd-4637-98c1-cd2b092fb556
B0511.9_NP1	B0511.9	17.7781	7.72959	0.772959	9.27551	207.765	102.754	14.4389	90.5717	0.0752243	0.0535333	0.102411	5'missing	B0511.9a.1	5 primer miss: exon 1 to 1	No extra exon.	5d1135e8-54a5-4c04-a8aa-6e56d2c0c0b1
B0511.9_NP1	B0511.9	65.3189	31.843	5.7154	27.7605	207.765	102.754	14.4389	90.5717	0.309895	0.395835	0.306503	3'missing	B0511.9b.1	5 primer miss: exon 1 to 3;3 primer miss: exon 2 to 4	No extra exon.	a2fd90ff-01c0-466f-86d6-ab9fb13ddf41
B0511.9_NP2	B0511.9	94.7279	44.3567	6.01447	44.3567	207.765	102.754	14.4389	90.5717	0.431679	0.416547	0.489741	5'missing	B0511.9d.1	5 primer miss: exon 1 to 1	No extra exon.	fcea22ab-c3a5-4951-8c70-712a280784ac
B0513.1_NP1	B0513.1	15.9207	7.96033	5.30688	2.65344	21.2275	12.1063	6.46776	2.65344	0.657534	0.820513	1	3'missing	B0513.1a.1	3 primer miss: exon 7 to 7	No extra exon.	63a24fcf-3805-4afd-9b17-9588afecdd0a
B0513.2_NP1	B0513.2	5.82907	1.71443	1.71443	2.4002	466.019	153.545	54.2785	258.196	0.0111657	0.0315858	0.00929605	5'missing	B0513.2a.2	5 primer miss: exon 1 to 1	No extra exon.	6f272185-99fa-4007-8870-892057bcd03f
B0513.2_NP1	B0513.2	8.04659	2.87378	0.574756	4.59805	466.019	153.545	54.2785	258.196	0.0187162	0.010589	0.0178084	3'missing	B0513.2b.1	5 primer miss: exon 1 to 1;3 primer miss: exon 2 to 2	No extra exon.	a554af4b-146c-445d-b39a-7b03d4951b2c
B0513.2_NP2	B0513.2	180.779	59.3002	18.4234	103.056	466.019	153.545	54.2785	258.196	0.386208	0.339423	0.399138	Extra_UTR	B0513.2a.2	No miss exon.	No extra exon.	aae950f3-2393-41de-8b23-aa3bfd489779
B0513.2_NP3	B0513.2	7.34216	1.95791	1.46843	3.91582	466.019	153.545	54.2785	258.196	0.0127514	0.0270537	0.0151661	Intron_retention	B0513.2a.2	Intron retention: intron 2 to 2	No extra exon.	b9505e77-5115-4a2f-8520-058935210280
B0513.2_NP4	B0513.2	15.6752	6.09592	0.870846	8.70846	466.019	153.545	54.2785	258.196	0.0397013	0.016044	0.0337281	5'missing	B0513.2a.2	5 primer miss: exon 1 to 1	No extra exon.	bd4ed1d9-e3a6-4b26-ab65-b33ddacdf660
B0513.2_NP5	B0513.2	12.8386	4.10834	2.05417	6.67606	466.019	153.545	54.2785	258.196	0.0267567	0.037845	0.0258566	Intron_retention	B0513.2a.2	Intron retention: intron 3 to 3	No extra exon.	ccb26644-fccf-482d-aab0-a5032b5deb9b
B0513.2_NP6	B0513.2	6.6251	2.20837	1.65628	2.76046	466.019	153.545	54.2785	258.196	0.0143826	0.0305144	0.0106913	5'missing	B0513.2a.2	5 primer miss: exon 1 to 1	No extra exon.	d4c0d653-10f5-4695-b8ee-67381baccb6d
B0513.2_NP7	B0513.2	105.709	34.5427	12.4853	58.681	466.019	153.545	54.2785	258.196	0.224968	0.230023	0.227273	Extra_UTR	B0513.2a.2	No miss exon.	No extra exon.	da666f8f-9699-4739-8e5d-cd8ff0b0fdbc
B0513.3_NP1	B0513.3	779.031	55.1428	277.935	445.954	7666.3	879.953	3081.25	3703.77	0.0626657	0.0902021	0.120405	Missing_UTR	B0513.3a.1	No miss exon.	No extra exon.	0916ab38-31be-42b5-a796-2dbb2a67d525
B0513.3_NP1	B0513.3	345.351	64.9937	158.446	121.911	7666.3	879.953	3081.25	3703.77	0.0738604	0.0514228	0.0329154	Extra_UTR	B0513.3a.1	No miss exon.	No extra exon.	0b166e60-61d3-4ac8-a2d7-446b6379b400
B0513.3_NP2	B0513.3	1559.2	157.984	674.012	727.202	7666.3	879.953	3081.25	3703.77	0.179537	0.218746	0.196341	Extra_UTR	B0513.3a.1	No miss exon.	No extra exon.	35118f0e-d725-4e86-b73f-6d287b915ee4
B0513.3_NP3	B0513.3	28.6168	5.65271	19.7845	3.17965	7666.3	879.953	3081.25	3703.77	0.00642387	0.00642093	0.000858489	Missing_UTR	B0513.3a.1	No miss exon.	No extra exon.	57eb8982-e79a-40ec-9e88-3f12bb69a1c5
B0513.3_NP4	B0513.3	12.5408	3.25132	3.25132	6.03817	7666.3	879.953	3081.25	3703.77	0.00369488	0.0010552	0.00163028	3'missing	B0513.3a.1	5 primer miss: exon 1 to 1;3 primer miss: exon 2 to 2	No extra exon.	8189f8d9-2a3c-4cc4-968e-2b4ee3c4a3f0
B0513.3_NP5	B0513.3	18.2741	3.99747	13.1345	1.14213	7666.3	879.953	3081.25	3703.77	0.00454282	0.00426274	0.00030837	3'missing	B0513.3a.1	5 primer miss: exon 1 to 1;3 primer miss: exon 2 to 2	No extra exon.	90343c2b-5e9e-40b0-8c3c-7d4877e5e4e2
B0513.3_NP6	B0513.3	233.914	52.656	131.64	49.6182	7666.3	879.953	3081.25	3703.77	0.0598396	0.042723	0.0133967	3'missing	B0513.3a.1	5 primer miss: exon 1 to 1;3 primer miss: exon 2 to 2	No extra exon.	959114f2-0881-42ae-ba4d-bb59398bb884
B0513.3_NP7	B0513.3	141.574	34.1503	81.8944	25.5298	7666.3	879.953	3081.25	3703.77	0.0388092	0.0265783	0.00689293	3'missing	B0513.3a.1	5 primer miss: exon 1 to 1;3 primer miss: exon 2 to 2	No extra exon.	9ce278de-18e0-4dbf-83d2-d9bb1b45421d
B0513.3_NP8	B0513.3	2418	287.561	978.499	1151.94	7666.3	879.953	3081.25	3703.77	0.326791	0.317566	0.311018	Extra_UTR	B0513.3a.1	No miss exon.	No extra exon.	a7f6d772-bc59-45c2-ade2-69a93d3576f4
B0513.3_NP9	B0513.3	242.265	45.0865	113.618	83.5603	7666.3	879.953	3081.25	3703.77	0.0512374	0.036874	0.0225609	Extra_UTR	B0513.3a.1	No miss exon.	No extra exon.	ae7cb62a-7b85-4db2-8e59-301c8aafb021
B0513.3_NP10	B0513.3	5.43324	2.71662	1.81108	0.90554	7666.3	879.953	3081.25	3703.77	0.00308723	0.000587775	0.000244491	3'missing	B0513.3a.1	5 primer miss: exon 1 to 1;3 primer miss: exon 2 to 2	No extra exon.	af41c0ed-eb31-4761-a5b1-d8ea6902f54a
B0513.3_NP11	B0513.3	847.346	56.9209	230.271	560.154	7666.3	879.953	3081.25	3703.77	0.0646863	0.0747331	0.151239	3'missing	B0513.3a.1	5 primer miss: exon 1 to 1;3 primer miss: exon 2 to 2	No extra exon.	b6b12fa4-04b9-4ec4-b391-cb54436d2331
B0513.3_NP12	B0513.3	5.9645	2.65089	3.31361	0	7666.3	879.953	3081.25	3703.77	0.00301254	0.00107541	0	Missing_UTR	B0513.3a.1	No miss exon.	No extra exon.	c6a1c0fb-a866-4b9a-a743-90b4bdde2ce3
B0513.3_NP13	B0513.3	87.9376	11.3322	31.5034	45.102	7666.3	879.953	3081.25	3703.77	0.0128781	0.0102243	0.0121773	New_junction	NA	NA	NA	ccbbd3d2-29e8-4ea2-89e0-92f874312fce
B0513.3_NP14	B0513.3	7.03023	0.852149	2.76948	3.40859	7666.3	879.953	3081.25	3703.77	0.000968403	0.00089882	0.000920304	Extra_UTR	B0513.3a.1	No miss exon.	No extra exon.	d922e4b3-3258-4bcf-bc14-7e2dae8e69fb
B0513.4_NP1	B0513.4	142.654	0	15.0629	127.591	383.766	0.409847	38.3027	345.054	0	0.39326	0.369773	Extra_UTR	B0513.4a.1	No miss exon.	No extra exon.	112ceec5-35df-40cd-8570-85dc8cd43425
B0513.4_NP1	B0513.4	9.02462	0	3.00821	6.01641	383.766	0.409847	38.3027	345.054	0	0.0785378	0.0174362	Missing_UTR	B0513.4b.1	No miss exon.	No extra exon.	541c5e4a-fae7-4823-be55-a319528a25d6
B0513.4_NP2	B0513.4	12.1935	0	1.82902	10.3645	383.766	0.409847	38.3027	345.054	0	0.0477518	0.0300372	Extra_UTR	B0513.4a.1	No miss exon.	No extra exon.	b8f52261-85e6-48d6-8457-cd8d9ccda013
B0513.4_NP3	B0513.4	130.493	0	10.4919	120.001	383.766	0.409847	38.3027	345.054	0	0.27392	0.347774	Extra_UTR	B0513.4a.1	No miss exon.	No extra exon.	f5863b02-7126-4f09-bbc6-8b6a077876ff
B0513.5_NP1	B0513.5	13.9748	0.931653	8.38488	4.65826	49.0887	3.19635	20.5348	25.3575	0.291474	0.408325	0.183704	5'missing	B0513.5a.1	5 primer miss: exon 1 to 1	No extra exon.	92bac1cc-4056-4aa5-a237-f091d3a352a0
B0513.5_NP1	B0513.5	28.9004	1.11155	10.004	17.7849	49.0887	3.19635	20.5348	25.3575	0.347757	0.487172	0.701365	Extra_UTR	B0513.5a.1	No miss exon.	No extra exon.	d2d18314-e12d-4983-852c-e36e20b32998
B0513.9_NP1	B0513.9	60.1447	3.83902	35.8309	20.4748	116.309	8.79623	74.6452	32.8678	0.43644	0.480016	0.622944	3'extra	B0513.9a.1	No miss exon.	5 primer extra: exon 1 to 2;3 primer extra: exon 2 to 3	18883861-707b-4ab6-9983-e5eb71ba45e3
B0513.9_NP1	B0513.9	53.29	4.95721	35.9397	12.393	116.309	8.79623	74.6452	32.8678	0.56356	0.481474	0.377056	3'extra	B0513.9a.1	No miss exon.	5 primer extra: exon 1 to 3;3 primer extra: exon 2 to 4	d06293d6-8343-40d7-a237-98584152a783
B0513.90_NP1	B0513.90	15.9207	0	7.96033	7.96033	15.9207	0	7.96033	7.96033	NA	1	1	3'missing	B0513.90.1	5 primer miss: exon 1 to 1;3 primer miss: exon 2 to 2	No extra exon.	b9295e5a-5e79-4c75-b5d6-113f740b6c98
B0523.3_NP1	B0523.3	68.2819	11.3803	7.78653	49.1151	168.494	30.3586	19.9897	118.145	0.374863	0.389527	0.415717	5'missing	B0523.3.1	5 primer miss: exon 1 to 1	No extra exon.	8721444a-4615-4536-9cbf-d2e48b39cbed
B0523.3_NP1	B0523.3	7.87188	1.43125	0.715625	5.725	168.494	30.3586	19.9897	118.145	0.0471449	0.0357997	0.0484573	Extra_exon	B0523.3.1	No miss exon.	Exon extra: exon 7 to 7	9c001823-c2d3-4eaf-b21d-7deb94a5e30f
B0523.3_NP2	B0523.3	8.80058	2.31594	0.463189	6.02145	168.494	30.3586	19.9897	118.145	0.0762863	0.0231713	0.0509665	5'extra	B0523.3.1	No miss exon.	5 primer extra: exon 1 to 8	bc0c0990-afaa-48a1-a1b6-402a1f433991
B0523.3_NP3	B0523.3	71.5987	12.1354	8.49476	50.9686	168.494	30.3586	19.9897	118.145	0.399735	0.424956	0.431406	Extra_UTR	B0523.3.1	No miss exon.	No extra exon.	c9e20a56-50d7-49fc-8bbc-7cf38a2e3493
B0523.3_NP4	B0523.3	6.89895	2.29965	1.83972	2.75958	168.494	30.3586	19.9897	118.145	0.0757496	0.0920333	0.0233575	Intron_retention	B0523.3.1	Intron retention: intron 4 to 4	No extra exon.	efa76857-4dc3-469a-9a87-72a67080d104
B0523.5_NP1	B0523.5	22.4712	13.3757	2.67514	6.42033	137.979	70.6111	20.6021	46.7658	0.189428	0.129848	0.137287	5'missing	B0523.5.1	5 primer miss: exon 1 to 8	No extra exon.	7e38b5fa-88c1-4dd8-a7c2-9334ea1060e7
B0523.5_NP1	B0523.5	7.4092	3.95157	1.31719	2.14044	137.979	70.6111	20.6021	46.7658	0.0559625	0.0639348	0.0457693	5'missing	B0523.5.1	5 primer miss: exon 1 to 2	No extra exon.	b4467e94-89ac-40b8-82ef-5dc4e81f7e30
B0523.5_NP2	B0523.5	5.329	2.33144	0.999187	1.99837	137.979	70.6111	20.6021	46.7658	0.033018	0.0484993	0.0427315	5'extra	B0523.5.1	5 primer miss: exon 1 to 6	5 primer extra: exon 1 to 1	cfb62c8e-2669-4dc1-8f63-6d8b39aa4b98
B0523.5_NP3	B0523.5	41.8654	19.3225	4.83063	17.7123	137.979	70.6111	20.6021	46.7658	0.273647	0.234473	0.378745	Intron_retention	B0523.5.1	Intron retention: intron 3 to 3	No extra exon.	d7e7d746-d791-4d2b-8954-e9bc9bab1fbc
B0523.5_NP4	B0523.5	20.0131	10.1885	3.27486	6.54973	137.979	70.6111	20.6021	46.7658	0.14429	0.158958	0.140054	5'missing	B0523.5.1	5 primer miss: exon 1 to 3	No extra exon.	ec9e6e93-8b6d-485c-a746-bd2f60225d78
B0523.5_NP5	B0523.5	5.71026	3.09986	0.815752	1.79465	137.979	70.6111	20.6021	46.7658	0.0439004	0.0395956	0.0383754	Intron_retention	B0523.5.1	5 primer miss: exon 1 to 1;Intron retention: intron 3 to 3	No extra exon.	ee90a316-857b-40f9-873f-70fd87e1c7a1
B0524.6_NP1	B0524.6	6.74417	3.37208	0.843021	2.52906	21.117	7.93269	2.85153	10.3328	0.425087	0.295638	0.244761	3'missing	B0524.6.1	5 primer miss: exon 1 to 6;3 primer miss: exon 2 to 7	No extra exon.	7eaf82d1-d6d0-4a12-ad81-5c0dffe3f3f0
B0524.6_NP1	B0524.6	12.051	3.01276	2.00851	7.02978	21.117	7.93269	2.85153	10.3328	0.379791	0.704362	0.680339	5'missing	B0524.6.1	5 primer miss: exon 1 to 5	No extra exon.	d022598e-ecb5-4ef5-9c81-daa156f76f37
B0545.1_NP1	B0545.1	5.5619	2.18503	3.17823	0.198639	78.2765	37.0928	36.9525	4.2312	0.0589071	0.0860083	0.0469462	New_junction	NA	NA	NA	12538386-330e-450a-865e-4d0af281069e
B0545.1_NP1	B0545.1	20.5096	11.0436	8.28273	1.18325	78.2765	37.0928	36.9525	4.2312	0.29773	0.224145	0.279648	5'missing	B0545.1b.2	5 primer miss: exon 1 to 1	No extra exon.	792e8366-9359-4b66-a62c-f3e207f3bc21
B0545.1_NP2	B0545.1	5.71984	2.2382	3.23295	0.248689	78.2765	37.0928	36.9525	4.2312	0.0603405	0.0874893	0.0587749	Intron_retention	B0545.1b.1	5 primer miss: exon 1 to 2;Intron retention: intron 4 to 4	No extra exon.	9644d591-d743-4e73-921c-d8426d083482
B0545.1_NP3	B0545.1	9.67473	4.14631	5.252	0.276421	78.2765	37.0928	36.9525	4.2312	0.111782	0.142128	0.0653291	5'missing	B0545.1b.1	5 primer miss: exon 1 to 2	No extra exon.	ac944d4f-08b4-42cb-b61a-8f11b506b5a1
B0545.1_NP4	B0545.1	14.1161	7.9403	4.8524	1.32338	78.2765	37.0928	36.9525	4.2312	0.214066	0.131315	0.312767	5'missing	B0545.1b.2	5 primer miss: exon 1 to 2	No extra exon.	f2d143d6-6fb1-4fc0-94ac-c2befd5b6d80
B0545.1_NP5	B0545.1	6.44638	2.79343	3.43807	0.214879	78.2765	37.0928	36.9525	4.2312	0.0753092	0.0930401	0.0507844	5'extra	B0545.1b.1	5 primer miss: exon 1 to 2	5 primer extra: exon 1 to 1	f4423de5-a274-4434-97ee-864a0aab22ef
B0545.4_NP1	B0545.4	14.5939	1.32672	1.32672	11.9405	14.5939	1.32672	1.32672	11.9405	1	1	1	5'extra	B0545.4.1	No miss exon.	5 primer extra: exon 1 to 1	3a296fcf-f2d0-44fe-9755-9dac7c8c6707
B0546.1_NP1	B0546.1	6.35945	1.52627	1.27189	3.56129	2105.27	433.689	371.202	1300.37	0.00351927	0.00342641	0.00273867	3'extra	B0546.1.1	No miss exon.	3 primer extra: exon 3 to 3	129eda2e-10bc-4401-ad91-d6f10f06a150
B0546.1_NP1	B0546.1	32.2584	10.5573	6.45168	15.2494	2105.27	433.689	371.202	1300.37	0.024343	0.0173805	0.011727	Missing_UTR	B0546.1.1	No miss exon.	No extra exon.	3c877e5b-9c5a-41fc-b558-31696a1f1b20
B0546.1_NP2	B0546.1	6.19361	1.95588	0.977939	3.2598	2105.27	433.689	371.202	1300.37	0.00450987	0.00263452	0.00250681	3'extra	B0546.1.1	No miss exon.	3 primer extra: exon 3 to 3	450ef7a5-d44d-4696-9d9a-6b0f480f5e1d
B0546.1_NP3	B0546.1	30.738	6.14759	5.32791	19.2625	2105.27	433.689	371.202	1300.37	0.0141751	0.0143531	0.014813	3'missing	B0546.1.1	5 primer miss: exon 1 to 1;3 primer miss: exon 2 to 2	No extra exon.	7368d16c-6cf1-429e-a3a6-c62449010361
B0546.1_NP4	B0546.1	5.43276	0.776109	1.35819	3.29846	2105.27	433.689	371.202	1300.37	0.00178955	0.00365889	0.00253655	3'missing	B0546.1.1	5 primer miss: exon 1 to 1;3 primer miss: exon 2 to 2	No extra exon.	7f64c5ba-675f-46e1-acf0-0b6f8d8b8be8
B0546.1_NP5	B0546.1	254.733	52.4221	35.7247	166.586	2105.27	433.689	371.202	1300.37	0.120875	0.0962405	0.128106	Extra_UTR	B0546.1.1	No miss exon.	No extra exon.	806511ea-9401-4659-8ba8-61125e1cfe63
B0546.1_NP6	B0546.1	115.813	37.1477	30.5922	48.0734	2105.27	433.689	371.202	1300.37	0.0856551	0.0824138	0.0369689	3'missing	B0546.1.1	5 primer miss: exon 1 to 1;3 primer miss: exon 2 to 2	No extra exon.	993a72d6-8912-4d3c-baed-2370b5957f7f
B0546.1_NP7	B0546.1	898.635	164.697	145.911	588.026	2105.27	433.689	371.202	1300.37	0.37976	0.393076	0.452198	Extra_UTR	B0546.1.1	No miss exon.	No extra exon.	a8bc9dd0-14fd-4f8c-bc3f-382295797eab
B0546.2_NP1	B0546.2	20.8154	10.5841	5.99767	4.23365	337.841	167.598	60.6878	109.556	0.0631519	0.0988281	0.0386437	5'missing	B0546.2a.1	5 primer miss: exon 1 to 2	No extra exon.	6f1282a2-a426-4e94-a624-3e30e66a377f
B0546.2_NP1	B0546.2	78.7268	36.6917	14.9617	27.0735	337.841	167.598	60.6878	109.556	0.218927	0.246535	0.24712	5'missing	B0546.2a.1	5 primer miss: exon 1 to 1	No extra exon.	720aa923-0039-4cc5-a21a-38818d02b5eb
B0546.2_NP2	B0546.2	97.522	45.4552	17.3556	34.7112	337.841	167.598	60.6878	109.556	0.271216	0.285982	0.316836	Extra_UTR	B0546.2a.1	No miss exon.	No extra exon.	90a37f4a-2d59-4068-99c9-c232f67a8a7a
B0546.2_NP3	B0546.2	16.1166	8.64794	3.5378	3.93088	337.841	167.598	60.6878	109.556	0.0515994	0.058295	0.0358802	Intron_retention	B0546.2a.1	Intron retention: intron 2 to 2	No extra exon.	cbdedec1-6e99-4565-ab3b-dbc0956d2b6e
B0546.4_NP1	B0546.4	7.20511	3.77411	2.7448	0.686201	313.631	119.587	137.094	56.9504	0.0315596	0.0200214	0.0120491	5'missing	B0546.4a.1	5 primer miss: exon 1 to 1	No extra exon.	085a91d7-1155-4028-831c-22192b90a5c7
B0546.4_NP1	B0546.4	14.6769	8.71438	4.12786	1.83461	313.631	119.587	137.094	56.9504	0.0728709	0.0301098	0.0322141	Missing_UTR	B0546.4c.3	No miss exon.	No extra exon.	40400bab-bd06-4d7b-bd21-28f6c65adc6d
B0546.4_NP2	B0546.4	5.89892	1.96631	3.08991	0.842703	313.631	119.587	137.094	56.9504	0.0164425	0.0225387	0.0147971	Intron_retention	B0546.4a.1	Intron retention: intron 2 to 2	No extra exon.	4d573e55-1d6b-46b9-b3a3-f87b1d480c5e
B0546.4_NP3	B0546.4	19.6652	8.2801	9.31511	2.07002	313.631	119.587	137.094	56.9504	0.0692393	0.067947	0.0363479	Intron_retention	B0546.4a.1	Intron retention: intron 2 to 2	No extra exon.	643da05e-70e7-47ef-b157-9e8197935635
B0546.4_NP4	B0546.4	59.3563	19.7854	27.8337	11.7371	313.631	119.587	137.094	56.9504	0.165449	0.203027	0.206094	Extra_UTR	B0546.4a.1	No miss exon.	No extra exon.	90063a5a-c7ac-4846-b237-495411c42760
B0546.4_NP5	B0546.4	57.2557	20.8815	25.5966	10.7775	313.631	119.587	137.094	56.9504	0.174614	0.186709	0.189244	Extra_UTR	B0546.4a.1	No miss exon.	No extra exon.	94bddd32-f5c6-4175-8ab0-2d6127ebbc98
B0546.4_NP6	B0546.4	60.1302	20.1554	28.2175	11.7573	313.631	119.587	137.094	56.9504	0.168542	0.205827	0.206448	Intron_retention	B0546.4a.1	Intron retention: intron 2 to 2	No extra exon.	c9492f63-ff7d-426a-a76d-8d43153f7cc0
B0547.1_NP1	B0547.1	6.58737	2.50947	1.56842	2.50947	397.804	133.058	63.1239	201.622	0.01886	0.0248467	0.0124464	Missing_UTR	B0547.1.1	No miss exon.	No extra exon.	4fc2f94f-5672-43e3-9cec-28e55698066e
B0547.1_NP1	B0547.1	16.7305	5.45559	3.27335	8.00153	397.804	133.058	63.1239	201.622	0.0410017	0.051856	0.0396858	5'missing	B0547.1.1	5 primer miss: exon 1 to 2	No extra exon.	6934c951-1456-44a8-a03a-c75f57582981
B0547.1_NP2	B0547.1	91.1374	29.7592	13.4846	47.8936	397.804	133.058	63.1239	201.622	0.223656	0.213621	0.237542	Extra_UTR	B0547.1.1	No miss exon.	No extra exon.	7acca1fc-27a9-4f18-9111-66d3a3dd4c4a
B0547.1_NP3	B0547.1	9.7873	3.35564	2.79637	3.63528	397.804	133.058	63.1239	201.622	0.0252195	0.0442997	0.0180302	Intron_retention	B0547.1.1	Intron retention: intron 2 to 2	No extra exon.	923ca1e9-d678-4ad7-88b4-cf8605731993
B0547.1_NP4	B0547.1	65.1116	25.8777	11.6867	27.5472	397.804	133.058	63.1239	201.622	0.194485	0.185139	0.136628	5'missing	B0547.1.1	5 primer miss: exon 1 to 1	No extra exon.	bf28c06f-05cf-43e0-b607-91ca2c8f4882
B0547.1_NP5	B0547.1	151.503	46.4695	20.3702	84.6636	397.804	133.058	63.1239	201.622	0.349243	0.322701	0.419912	Extra_UTR	B0547.1.1	No miss exon.	No extra exon.	e0feb82e-7c46-42aa-8e96-9694d78cae2d
B0554.5_NP1	B0554.5	12.3459	0	11.6961	0.649783	28.7825	0	27.4141	1.36842	NA	0.426646	0.474841	Missing_UTR	B0554.5.1	No miss exon.	No extra exon.	d3c09dbb-14e6-4c72-aa2f-4335a10e8ec3
B0563.2_NP1	B0563.2	6.53463	4.12713	1.37571	1.03178	61.4559	43.7581	9.65404	8.04378	0.0943171	0.142501	0.128271	5'missing	B0563.2.2	5 primer miss: exon 1 to 1	No extra exon.	02458d44-3a00-490b-a986-a4f2bd375800
B0563.2_NP1	B0563.2	6.97687	4.88381	1.39537	0.697687	61.4559	43.7581	9.65404	8.04378	0.111609	0.144538	0.0867361	Extra_UTR	B0563.2.2	No miss exon.	No extra exon.	95300b30-bd94-4e19-a2ca-d3b3cfb4478c
B0563.2_NP2	B0563.2	17.5906	12.4169	3.10423	2.06949	61.4559	43.7581	9.65404	8.04378	0.283763	0.321547	0.257278	Missing_UTR	B0563.2.2	No miss exon.	No extra exon.	a3b0de2b-572b-40b8-9e4a-ae38dc172310
B0563.2_NP3	B0563.2	6.03184	4.02123	0.670205	1.34041	61.4559	43.7581	9.65404	8.04378	0.0918969	0.0694222	0.166639	5'missing	B0563.2.2	5 primer miss: exon 1 to 1	No extra exon.	bb794f0e-7406-4dc3-b728-fe8189dd89ad
B0563.4_NP1	B0563.4	6.56727	0.98509	4.92545	0.656727	301.166	92.496	141.259	67.4108	0.0106501	0.0348683	0.00974216	5'missing	B0563.4.1	5 primer miss: exon 1 to 1	No extra exon.	2fdb448e-d565-4b30-a481-6dc69124d469
B0563.4_NP1	B0563.4	67.3753	19.6943	24.877	22.804	301.166	92.496	141.259	67.4108	0.212921	0.17611	0.338283	Extra_UTR	B0563.4.1	No miss exon.	No extra exon.	58bc32e1-c174-4ee7-ab45-3213d1c32f45
B0563.4_NP2	B0563.4	212.872	68.9067	102.13	41.8362	301.166	92.496	141.259	67.4108	0.744969	0.722996	0.620616	5'missing	B0563.4.1	5 primer miss: exon 1 to 1	No extra exon.	5c3e598e-de74-4fb0-85c3-8d728987bb0a
B0564.1_NP1	B0564.1	45.1918	19.2306	7.69222	18.269	256.144	89.9051	30.3474	135.892	0.213898	0.253472	0.134438	5'extra	B0564.1a.1	No miss exon.	5 primer extra: exon 1 to 1	2c6d068b-821c-4994-b149-438283609814
B0564.1_NP1	B0564.1	5.52602	2.87353	0.663123	1.98937	256.144	89.9051	30.3474	135.892	0.0319618	0.0218511	0.0146393	5'extra	B0564.1a.1	3 primer miss: exon 4 to 4	5 primer extra: exon 1 to 1	48420ee8-d5fa-4160-8089-38ae2760b0ea
B0564.1_NP2	B0564.1	6.43261	2.92392	0.584783	2.92392	256.144	89.9051	30.3474	135.892	0.0325222	0.0192696	0.0215165	5'missing	B0564.1a.1	5 primer miss: exon 1 to 1	No extra exon.	8b2106e9-36b0-4c08-bba9-fb83dd08c9b6
B0564.1_NP3	B0564.1	23.8474	13.0077	2.70993	8.1298	256.144	89.9051	30.3474	135.892	0.144682	0.089297	0.0598255	5'extra	B0564.1a.1	No miss exon.	5 primer extra: exon 1 to 1	a240b480-57bc-4b8c-ade6-c029955a3699
B0564.1_NP4	B0564.1	139.673	36.0447	13.5168	90.1118	256.144	89.9051	30.3474	135.892	0.40092	0.445401	0.663114	5'extra	B0564.1a.1	No miss exon.	5 primer extra: exon 1 to 2	d2259118-185c-4c40-8c8f-00fb6224f237
B0564.1_NP5	B0564.1	5.12169	1.50638	1.2051	2.41021	256.144	89.9051	30.3474	135.892	0.0167552	0.0397103	0.0177362	5'extra	B0564.1a.1	5 primer miss: exon 1 to 1	5 primer extra: exon 1 to 2	d41caed9-2f82-4e57-a047-797728c87989
B0564.10_NP1	B0564.10	15.9207	10.2347	4.54876	1.13719	26.5344	18.2503	7.14692	1.13719	0.560796	0.636464	1	Extra_UTR	B0564.10a.1	No miss exon.	No extra exon.	4541f774-42c6-446b-8038-0ce3666afe6b
B0564.10_NP1	B0564.10	5.63856	5.63856	0	0	26.5344	18.2503	7.14692	1.13719	0.308957	0	0	Extra_UTR	B0564.10a.1	No miss exon.	No extra exon.	912192b9-effe-4184-88d8-a0e5fb777ff7
B0564.11_NP1	B0564.11	98.6196	37.7075	15.4697	45.4424	175.423	75.8828	25.3293	74.2104	0.496918	0.610745	0.612345	Extra_UTR	B0564.11.1	No miss exon.	No extra exon.	31a9dc53-ab2e-4174-bcbc-5b6f7b5e2268
B0564.11_NP1	B0564.11	5.18843	2.30597	1.15298	1.72948	175.423	75.8828	25.3293	74.2104	0.0303886	0.0455197	0.023305	3'missing	B0564.11.1	3 primer miss: exon 6 to 7	No extra exon.	bb44c6a8-0950-4af8-8499-0d8799c5443b
B0564.11_NP2	B0564.11	9.65505	5.90031	0	3.75474	175.423	75.8828	25.3293	74.2104	0.0777556	0	0.0505959	5'missing	B0564.11.1	5 primer miss: exon 1 to 1	No extra exon.	bfc095a0-4b15-4f00-83ad-26066a89abeb
B0564.11_NP3	B0564.11	5.89601	3.36915	0	2.52686	175.423	75.8828	25.3293	74.2104	0.0443994	0	0.03405	Extra_UTR	B0564.11.1	No miss exon.	No extra exon.	fb265c82-bad3-4110-b2f5-ee9785fe3cec
B0564.2_NP1	B0564.2	16.584	1.27569	1.27569	14.0326	18.5741	2.60241	1.27569	14.696	0.490196	1	0.954861	Extra_UTR	B0564.2a.1	No miss exon.	No extra exon.	37f5e0c2-95f4-4be1-9985-fa963c8b9030
B0564.3_NP1	B0564.3	5.76729	0	5.76729	0	750.393	9.57576	729.743	11.0739	0	0.00790318	0	5'missing	B0564.3.2	5 primer miss: exon 1 to 2	No extra exon.	36d91c5e-0561-444c-9aed-77904ea737ae
B0564.3_NP1	B0564.3	5.56326	0	5.45417	0.109083	750.393	9.57576	729.743	11.0739	0	0.0074741	0.00985052	5'extra	B0564.3.2	5 primer miss: exon 1 to 3	5 primer extra: exon 1 to 1	5ce7d175-7e17-44c8-83be-7a6eadb71fee
B0564.3_NP2	B0564.3	37.079	0.257493	36.3065	0.514986	750.393	9.57576	729.743	11.0739	0.0268901	0.0497525	0.0465046	5'missing	B0564.3.2	5 primer miss: exon 1 to 2	No extra exon.	5e9c2440-8839-43d0-ba77-9fe1d9195295
B0564.3_NP3	B0564.3	15.6077	0.18362	15.4241	0	750.393	9.57576	729.743	11.0739	0.0191755	0.0211363	0	3'missing	B0564.3.2	5 primer miss: exon 1 to 3;3 primer miss: exon 2 to 4	No extra exon.	74827807-405d-42e7-aba1-935d32e40ade
B0564.3_NP4	B0564.3	6.22853	0.0973208	6.13121	0	750.393	9.57576	729.743	11.0739	0.0101632	0.00840187	0	Fusion_gene	B0564.3.2	5 primer miss: exon 1 to 1	5 primer extra: exon 1 to 1	c0064c5c-ec12-4095-b1b7-bb6be8bb5fe7
B0564.3_NP5	B0564.3	49.7013	0.28564	48.8444	0.571279	750.393	9.57576	729.743	11.0739	0.0298294	0.0669337	0.0515879	3'missing	B0564.3.2	5 primer miss: exon 1 to 1;3 primer miss: exon 4 to 4	No extra exon.	c173c2a3-85d6-48ae-baff-c91b05382b9a
B0564.3_NP6	B0564.3	12.9543	0.161928	12.7923	0	750.393	9.57576	729.743	11.0739	0.0169102	0.0175299	0	Missing_UTR	B0564.3.2	No miss exon.	No extra exon.	cca74b35-fd89-453e-a3a8-0366fd049d3d
B0564.3_NP7	B0564.3	23.7892	0.290112	23.499	0	750.393	9.57576	729.743	11.0739	0.0302965	0.0322018	0	5'missing	B0564.3.2	5 primer miss: exon 1 to 2	No extra exon.	d8666921-98c8-4c7d-94da-e78abd745feb
B0564.3_NP8	B0564.3	249.262	3.48271	240.804	4.97529	750.393	9.57576	729.743	11.0739	0.3637	0.329985	0.449282	3'missing	B0564.3.2	5 primer miss: exon 1 to 1;3 primer miss: exon 4 to 4	No extra exon.	dbe80624-3de8-42ed-8b05-1c48a7432dd1
B0564.3_NP9	B0564.3	30.3564	0.242851	30.1136	0	750.393	9.57576	729.743	11.0739	0.025361	0.041266	0	Intron_retention	B0564.3.2	Intron retention: intron 2 to 2	No extra exon.	dd5b07a4-0897-475a-a579-5bf1e3d7cadc
B0564.3_NP10	B0564.3	8.83373	0	8.6865	0.147229	750.393	9.57576	729.743	11.0739	0	0.0119035	0.0132951	3'missing	B0564.3.2	5 primer miss: exon 1 to 1;3 primer miss: exon 4 to 4	No extra exon.	e853e75b-6976-442d-b108-8e4b505bc142
B0564.3_NP11	B0564.3	5.29791	0	5.19196	0.105958	750.393	9.57576	729.743	11.0739	0	0.00711477	0.0095683	Fusion_gene	B0564.3.2	5 primer miss: exon 1 to 2;3 primer miss: exon 4 to 4	5 primer extra: exon 1 to 1	fdab74fe-437e-41a4-b201-4270ae2ffabb
B0564.7_NP1	B0564.7	20.7337	5.48833	3.65889	11.5865	196.959	49.8842	32.9505	114.124	0.110022	0.111042	0.101525	5'missing	B0564.7a.1	5 primer miss: exon 1 to 1	No extra exon.	41126bd5-f299-4e51-9f9a-7cc02358fda8
B0564.7_NP1	B0564.7	8.15196	2.3667	1.5778	4.20747	196.959	49.8842	32.9505	114.124	0.0474439	0.047884	0.0368673	Intron_retention	B0564.7a.1	Intron retention: intron 4 to 4	No extra exon.	54bebaba-3962-4615-977c-dc63bb5fde38
B0564.7_NP2	B0564.7	39.4405	9.75409	6.78546	22.9009	196.959	49.8842	32.9505	114.124	0.195535	0.205929	0.200666	Intron_retention	B0564.7a.1	Intron retention: intron 2 to 2	No extra exon.	55401ca2-16d2-41b2-919e-11ee499d612a
B0564.7_NP3	B0564.7	6.36089	1.88471	1.41353	3.06265	196.959	49.8842	32.9505	114.124	0.0377817	0.0428987	0.0268361	Intron_retention	B0564.7a.1	Intron retention: intron 6 to 6	No extra exon.	66de1632-1076-436b-a39e-791450ca5521
B0564.7_NP4	B0564.7	63.3214	15.5791	10.051	37.6913	196.959	49.8842	32.9505	114.124	0.312305	0.305034	0.330265	New_junction	NA	NA	NA	eb3cdbb8-ac98-40b4-979c-3224aaba5777
B0564.7_NP5	B0564.7	9.45657	2.64784	2.26958	4.53915	196.959	49.8842	32.9505	114.124	0.0530798	0.0688785	0.0397737	New_junction	NA	NA	NA	f33262c8-0dfb-4887-91f1-19c0f9bc9c9d
BE0003N10.1_NP1	BE0003N10.1	25.2077	6.63361	2.65344	15.9207	25.2077	6.63361	2.65344	15.9207	1	1	1	Extra_UTR	BE0003N10.1.1	No miss exon.	No extra exon.	0f5d2bd6-1604-4cf3-a8ae-afc815e63e17
BE0003N10.2_NP1	BE0003N10.2	6.82314	2.62428	0	4.19885	64.3776	24.0296	0.819467	39.5285	0.10921	0	0.106223	3'missing	BE0003N10.2.1	5 primer miss: exon 1 to 1;3 primer miss: exon 7 to 9	No extra exon.	5ffc89ca-069e-4aff-8b68-c06718d7fcf5
BE0003N10.2_NP1	BE0003N10.2	35.2371	12.292	0.819467	22.1256	64.3776	24.0296	0.819467	39.5285	0.511536	1	0.559738	Extra_UTR	BE0003N10.2.1	No miss exon.	No extra exon.	8fc15125-bbf0-4503-ab6c-fa6a2ada8c53
BE0003N10.3_NP1	BE0003N10.3	33.8314	32.5302	1.30121	0	50.4154	46.5628	2.5769	1.27569	0.69863	0.50495	0	3'missing	BE0003N10.3a.1	3 primer miss: exon 9 to 11	No extra exon.	a2ff4cd7-135d-48b8-977d-aa19dd387221
BE0003N10.3_NP1	BE0003N10.3	16.584	14.0326	1.27569	1.27569	50.4154	46.5628	2.5769	1.27569	0.30137	0.49505	1	3'missing	BE0003N10.3b.1	3 primer miss: exon 9 to 10	No extra exon.	af36653a-70e4-4016-82c7-5e26b3f0cd8f
BE0003N10.6_NP1	BE0003N10.6	6.23559	0	4.15706	2.07853	7.29697	0	5.21844	2.07853	NA	0.79661	1	Extra_UTR	BE0003N10.6a.1	No miss exon.	No extra exon.	b5163e37-5e05-4d29-a6e9-c54d891e68f7
BE10.1_NP1	BE10.1	5.08576	0	1.69525	3.39051	9.28705	0	3.18782	6.09923	NA	0.531792	0.555891	5'missing	BE10.1.1	5 primer miss: exon 1 to 1	No extra exon.	8f783629-8e21-4190-973d-624e38b8419b
BE10.2_NP1	BE10.2	22.1083	19.5574	2.1258	0.42516	123.385	113.53	8.39169	1.46312	0.172266	0.253322	0.290584	5'extra	BE10.2.1	No miss exon.	5 primer extra: exon 1 to 1	671321e2-7f1e-4e38-822d-409262cdc0de
BE10.2_NP1	BE10.2	57.9298	52.6635	4.60805	0.658293	123.385	113.53	8.39169	1.46312	0.463872	0.549121	0.449923	Extra_UTR	BE10.2.1	No miss exon.	No extra exon.	78323260-d4c0-493e-9374-1e907412922e
BE10.2_NP2	BE10.2	12.379	11.4948	0.884217	0	123.385	113.53	8.39169	1.46312	0.101249	0.105368	0	3'missing	BE10.2.1	3 primer miss: exon 8 to 8	No extra exon.	d0f7e5cb-46e3-48bb-af6e-6a9b905fa036
BE10.2_NP3	BE10.2	17.4648	16.7055	0.37967	0.37967	123.385	113.53	8.39169	1.46312	0.147146	0.0452436	0.259493	5'missing	BE10.2.1	5 primer miss: exon 1 to 1	No extra exon.	e4de9ff2-414e-4d2a-ae68-088dce7ced85
C01A2.1_NP1	C01A2.1	13.7095	12.3385	1.37095	0	26.5344	25.1635	1.37095	0	0.490334	1	NA	3'extra	C01A2.1b.1	5 primer miss: exon 1 to 1;3 primer miss: exon 2 to 2	5 primer extra: exon 1 to 1;3 primer extra: exon 2 to 2	6567802e-a3e2-4364-aaa0-a53f392e4daa
C01A2.1_NP1	C01A2.1	5.74912	5.74912	0	0	26.5344	25.1635	1.37095	0	0.228471	0	NA	Extra_UTR	C01A2.1c.1	No miss exon.	No extra exon.	fb3e0c74-3335-4569-9882-7e12ac3d8432
C01A2.2_NP1	C01A2.2	8.30464	4.15232	3.11424	1.03808	112.771	62.7324	34.313	15.7259	0.066191	0.0907599	0.0660109	Missing_UTR	C01A2.2a.1	No miss exon.	No extra exon.	78806e02-21cf-4158-9aaa-9db532532c9b
C01A2.2_NP1	C01A2.2	75.5252	41.2871	22.1541	12.084	112.771	62.7324	34.313	15.7259	0.658146	0.645647	0.768416	5'missing	C01A2.2a.1	5 primer miss: exon 1 to 1	No extra exon.	7d874d7d-f0ed-4f1a-8bb5-eb2e9979f40f
C01A2.2_NP2	C01A2.2	7.64128	3.82064	2.86548	0.95516	112.771	62.7324	34.313	15.7259	0.0609037	0.0835102	0.0607381	5'missing	C01A2.2a.1	5 primer miss: exon 1 to 1	No extra exon.	e1e99a9a-761f-4342-a701-a6a0c00e260e
C01A2.3_NP1	C01A2.3	56.6068	21.6698	5.30688	29.6301	180.434	68.2752	16.733	95.4259	0.317389	0.317151	0.310504	Extra_UTR	C01A2.4.1	No miss exon.	No extra exon.	33b1cca5-89cc-4238-b4b9-f25b852751a3
C01A2.3_NP1	C01A2.3	62.577	23.4664	5.98163	33.129	180.434	68.2752	16.733	95.4259	0.343703	0.357475	0.34717	3'extra	C01A2.3.1	5 primer miss: exon 1 to 3;3 primer miss: exon 2 to 4	5 primer extra: exon 1 to 4;3 primer extra: exon 2 to 5	8e57204b-9dbe-48bf-ab0a-7cec4bbcb4ef
C01A2.3_NP2	C01A2.3	61.2503	23.139	5.44447	32.6668	180.434	68.2752	16.733	95.4259	0.338908	0.325374	0.342326	3'extra	C01A2.3.1	5 primer miss: exon 1 to 3;3 primer miss: exon 2 to 4	5 primer extra: exon 1 to 3;3 primer extra: exon 2 to 4	a1b018c0-9e1b-4817-ba7d-eadc69846967
C01A2.4_NP1	C01A2.4	5.11796	1.88556	1.34683	1.88556	212.144	68.9543	63.7035	79.4859	0.0273452	0.0211422	0.023722	Extra_UTR	C01A2.4.1	No miss exon.	No extra exon.	7698f3c7-3af1-4bf5-a7e8-8a751b9c0012
C01A2.4_NP1	C01A2.4	67.9161	18.6769	22.0727	27.1664	212.144	68.9543	63.7035	79.4859	0.27086	0.346492	0.341777	Extra_UTR	C01A2.4.1	No miss exon.	No extra exon.	898f2559-bbb8-4c29-a3ac-3d5c85110c2b
C01A2.4_NP2	C01A2.4	9.96786	3.06704	3.83379	3.06704	212.144	68.9543	63.7035	79.4859	0.0444793	0.0601819	0.0385859	3'missing	C01A2.4.1	5 primer miss: exon 1 to 1;3 primer miss: exon 5 to 5	No extra exon.	927e1950-5669-43cd-84f9-64dde1379950
C01A2.4_NP3	C01A2.4	87.3599	31.8746	21.2497	34.2356	212.144	68.9543	63.7035	79.4859	0.462257	0.333572	0.430713	5'missing	C01A2.4.1	5 primer miss: exon 1 to 1	No extra exon.	b6d9d45b-5aed-4ffc-b6ac-ef8100e80d01
C01A2.5_NP1	C01A2.5	99.066	41.8957	17.893	39.2773	332.782	162.141	62.322	108.318	0.25839	0.287105	0.362609	Extra_UTR	C01A2.5.1	No miss exon.	No extra exon.	2e207ed0-1a7d-4926-90d2-d63d73f971f2
C01A2.5_NP1	C01A2.5	11.8893	6.91241	1.93547	3.04146	332.782	162.141	62.322	108.318	0.042632	0.031056	0.0280789	3'extra	C01A2.5.1	No miss exon.	3 primer extra: exon 4 to 4	3474030b-e8cf-4b7e-9132-00ed451ff186
C01A2.5_NP2	C01A2.5	7.98552	4.49185	1.49728	1.99638	332.782	162.141	62.322	108.318	0.0277033	0.024025	0.0184307	3'extra	C01A2.5.1	5 primer miss: exon 1 to 1	3 primer extra: exon 3 to 3	4b5a1dac-d4c5-44a7-89e5-7f77a4bfce68
C01A2.5_NP3	C01A2.5	6.51138	4.34092	0.930197	1.24026	332.782	162.141	62.322	108.318	0.0267725	0.0149257	0.0114502	Missing_UTR	C01A2.5.1	No miss exon.	No extra exon.	5ddf1d09-45da-41c7-a4bc-a9414a3b7143
C01A2.5_NP4	C01A2.5	96.4125	52.9324	19.8496	23.6305	332.782	162.141	62.322	108.318	0.326458	0.318501	0.218158	5'missing	C01A2.5.1	5 primer miss: exon 1 to 1	No extra exon.	a95c6573-3646-4742-9b93-5d14de16f71a
C01A2.5_NP5	C01A2.5	14.3748	9.34364	2.15623	2.87497	332.782	162.141	62.322	108.318	0.0576265	0.0345982	0.0265418	3'missing	C01A2.5.1	5 primer miss: exon 1 to 2;3 primer miss: exon 2 to 3	No extra exon.	e57a3287-a397-4ee7-8de0-1e0d9dafc836
C01A2.7_NP1	C01A2.7	20.7764	2.70996	17.6148	0.451661	132.672	24.7388	104.299	3.63406	0.109543	0.168887	0.124285	Extra_UTR	C01A2.7a.1	No miss exon.	No extra exon.	22a1fde7-6154-4f48-9889-eaa66504627d
C01A2.7_NP1	C01A2.7	11.2771	3.75904	7.51809	0	132.672	24.7388	104.299	3.63406	0.151949	0.0720819	0	Missing_UTR	C01A2.7a.1	No miss exon.	No extra exon.	26d241d5-0873-4cb8-8611-28a89c3e7a0c
C01A2.7_NP2	C01A2.7	13.8743	5.33626	7.47077	1.06725	132.672	24.7388	104.299	3.63406	0.215704	0.0716282	0.293681	Missing_UTR	C01A2.7a.1	No miss exon.	No extra exon.	58a69b39-3bdc-4556-8196-a0b46712c29c
C01A2.7_NP3	C01A2.7	18.5652	3.90846	13.6796	0.977115	132.672	24.7388	104.299	3.63406	0.157989	0.131157	0.268877	5'missing	C01A2.7a.1	5 primer miss: exon 1 to 1	No extra exon.	ce30805e-0702-4e66-9957-78b1fb20cc1c
C01A2.7_NP4	C01A2.7	17.0837	1.13891	15.9448	0	132.672	24.7388	104.299	3.63406	0.0460375	0.152875	0	Extra_UTR	C01A2.7b.1	No miss exon.	No extra exon.	e1c95255-3248-4c76-af94-11032a456d42
C01A2.7_NP5	C01A2.7	30.7268	5.12113	24.4676	1.13803	132.672	24.7388	104.299	3.63406	0.207008	0.234591	0.313157	Extra_UTR	C01A2.7a.1	No miss exon.	No extra exon.	fcd437db-5269-4ec5-ab33-4e1aafde07ae
C01B10.10_NP1	C01B10.10	35.2023	18.7746	12.9075	3.52023	40.863	21.627	15.1408	4.09515	0.868107	0.852497	0.859611	Extra_UTR	C01B10.10.1	No miss exon.	No extra exon.	7ccb4f50-c825-4c2d-8dc3-07063843a018
C01B10.11_NP1	C01B10.11	221.585	172.203	39.2521	10.1296	291.879	225.029	51.1384	15.7113	0.765247	0.767567	0.644733	Extra_UTR	C01B10.11.1	No miss exon.	No extra exon.	1219729f-a34d-41b0-b102-a589b250755a
C01B10.11_NP1	C01B10.11	7.98244	7.41226	0.570174	0	291.879	225.029	51.1384	15.7113	0.0329392	0.0111496	0	3'missing	C01B10.11.1	3 primer miss: exon 6 to 6	No extra exon.	589286db-cfc0-4999-a14d-6bfbb599388b
C01B10.11_NP2	C01B10.11	38.4749	28.8562	5.49642	4.12231	291.879	225.029	51.1384	15.7113	0.128233	0.107481	0.262379	5'missing	C01B10.11.1	5 primer miss: exon 1 to 1	No extra exon.	c180c111-a62a-4d79-a4d5-93650d2e718a
C01B10.11_NP3	C01B10.11	8.093	4.62457	3.46843	0	291.879	225.029	51.1384	15.7113	0.020551	0.0678244	0	Intron_retention	C01B10.11.1	Intron retention: intron 4 to 4	No extra exon.	d7062d13-4c2c-40ec-8fee-2954812a3bd3
C01B10.3_NP1	C01B10.3	103.116	0	33.1443	69.9714	118.078	1.13192	38.0801	78.8662	0	0.870386	0.887216	Extra_UTR	C01B10.3.1	No miss exon.	No extra exon.	000f36fa-1902-4311-8439-f5f76433aeb5
C01B10.5_NP1	C01B10.5	58.7519	57.1726	1.57935	0	2794.35	2695.48	98.8696	0	0.0212105	0.0159741	NA	Missing_UTR	C01B10.5a.1	No miss exon.	No extra exon.	0e71d699-2ca1-4272-a20a-4f39bcba5164
C01B10.5_NP1	C01B10.5	57.3454	55.0331	2.31231	0	2794.35	2695.48	98.8696	0	0.0204168	0.0233875	NA	Missing_UTR	C01B10.5a.1	No miss exon.	No extra exon.	17ed3d0c-26f1-4d80-a33d-5f5456e0e1c6
C01B10.5_NP2	C01B10.5	14.1377	13.2541	0.883608	0	2794.35	2695.48	98.8696	0	0.00491717	0.0089371	NA	3'missing	C01B10.5a.1	3 primer miss: exon 3 to 3	No extra exon.	1d480d87-4625-4b66-8ac3-f3801866844c
C01B10.5_NP3	C01B10.5	63.554	61.4496	2.10444	0	2794.35	2695.48	98.8696	0	0.0227973	0.021285	NA	Missing_UTR	C01B10.5a.1	No miss exon.	No extra exon.	200465d2-9643-437b-bc81-215dee9327c6
C01B10.5_NP4	C01B10.5	29.9181	28.9832	0.934941	0	2794.35	2695.48	98.8696	0	0.0107525	0.0094563	NA	Missing_UTR	C01B10.5a.1	No miss exon.	No extra exon.	2f3c617b-e9d5-4d61-8533-63f14050406a
C01B10.5_NP5	C01B10.5	737.019	708.81	28.2084	0	2794.35	2695.48	98.8696	0	0.262963	0.285309	NA	3'extra	C01B10.5a.1	No miss exon.	3 primer extra: exon 4 to 4	2f7fcddc-0d27-4c2c-a15b-d6bfb762327b
C01B10.5_NP6	C01B10.5	11.2284	10.3933	0.835173	0	2794.35	2695.48	98.8696	0	0.00385582	0.00844722	NA	3'missing	C01B10.5a.1	3 primer miss: exon 3 to 3	No extra exon.	343d0b47-7e82-4b5d-9960-6f328f49f48e
C01B10.5_NP7	C01B10.5	27.4804	26.7934	0.68701	0	2794.35	2695.48	98.8696	0	0.00994012	0.00694864	NA	3'extra	C01B10.5a.1	No miss exon.	3 primer extra: exon 4 to 4	34b70f99-adcb-492e-8d16-3c0dc834cba9
C01B10.5_NP8	C01B10.5	214.849	207.406	7.4436	0	2794.35	2695.48	98.8696	0	0.0769458	0.075287	NA	Missing_UTR	C01B10.5a.1	No miss exon.	No extra exon.	4a271097-ea16-471b-87a3-582a0b3ed26c
C01B10.5_NP9	C01B10.5	8.31452	7.87304	0.441479	0	2794.35	2695.48	98.8696	0	0.00292083	0.00446527	NA	3'extra	C01B10.5a.1	No miss exon.	3 primer extra: exon 4 to 4	5607c65e-201f-4524-92ff-49cd17b0da34
C01B10.5_NP10	C01B10.5	71.8566	69.6513	2.20532	0	2794.35	2695.48	98.8696	0	0.02584	0.0223053	NA	Missing_UTR	C01B10.5a.1	No miss exon.	No extra exon.	5ad95795-9e5c-437a-b203-2befaa3a848b
C01B10.5_NP11	C01B10.5	15.5537	14.6827	0.871005	0	2794.35	2695.48	98.8696	0	0.00544714	0.00880963	NA	3'missing	C01B10.5e.1	5 primer miss: exon 1 to 1;3 primer miss: exon 2 to 2	No extra exon.	5ef463e9-9049-4b5e-8f9e-ab50016bebe5
C01B10.5_NP12	C01B10.5	26.623	25.0797	1.54336	0	2794.35	2695.48	98.8696	0	0.00930435	0.0156101	NA	5'missing	C01B10.5a.1	5 primer miss: exon 1 to 1	No extra exon.	89207c0a-d239-47d5-9986-d847fd53a4de
C01B10.5_NP13	C01B10.5	5.97098	5.69326	0.27772	0	2794.35	2695.48	98.8696	0	0.00211215	0.00280895	NA	New_junction	NA	NA	NA	89e09bc0-aeff-4c4e-bccf-d3362cf1a285
C01B10.5_NP14	C01B10.5	9.93891	9.3304	0.608505	0	2794.35	2695.48	98.8696	0	0.0034615	0.00615462	NA	Missing_UTR	C01B10.5a.1	No miss exon.	No extra exon.	9efa41a6-b4b2-4e30-aa53-904f83b9e9b5
C01B10.5_NP15	C01B10.5	42.4702	40.7609	1.70933	0	2794.35	2695.48	98.8696	0	0.015122	0.0172887	NA	Missing_UTR	C01B10.5a.1	No miss exon.	No extra exon.	a95814a9-a975-4730-8527-ff9c714f3d75
C01B10.5_NP16	C01B10.5	17.4177	16.8734	0.544302	0	2794.35	2695.48	98.8696	0	0.00625988	0.00550525	NA	3'extra	C01B10.5a.1	No miss exon.	3 primer extra: exon 4 to 4	ac17454a-9e9d-4925-b707-be5c93ead465
C01B10.5_NP17	C01B10.5	63.0407	61.3544	1.68627	0	2794.35	2695.48	98.8696	0	0.022762	0.0170555	NA	Missing_UTR	C01B10.5a.1	No miss exon.	No extra exon.	bc10924f-30d4-4fc5-b1e9-e4ed6c50f37b
C01B10.5_NP18	C01B10.5	564.685	545.989	18.6957	0	2794.35	2695.48	98.8696	0	0.202558	0.189094	NA	5'missing	C01B10.5a.1	5 primer miss: exon 1 to 1	No extra exon.	c31b7f42-bc1d-4b9e-8bea-bbbac5a72c4d
C01B10.5_NP19	C01B10.5	53.1155	51.6158	1.49973	0	2794.35	2695.48	98.8696	0	0.019149	0.0151688	NA	3'extra	C01B10.5a.1	No miss exon.	3 primer extra: exon 4 to 4	cea7670f-87fd-4d10-bb1f-7730c36f1e31
C01B10.5_NP20	C01B10.5	7.02363	6.59141	0.432223	0	2794.35	2695.48	98.8696	0	0.00244536	0.00437165	NA	3'missing	C01B10.5a.1	3 primer miss: exon 3 to 3	No extra exon.	d31c3a95-d77a-4703-be22-716eb8c68e41
C01B10.5_NP21	C01B10.5	28.6859	28.1289	0.557008	0	2794.35	2695.48	98.8696	0	0.0104356	0.00563377	NA	3'extra	C01B10.5a.1	No miss exon.	3 primer extra: exon 4 to 4	d4d35a34-b7be-436f-ae1a-f90a9b42cc02
C01B10.5_NP22	C01B10.5	29.2888	28.1854	1.10334	0	2794.35	2695.48	98.8696	0	0.0104566	0.0111596	NA	Missing_UTR	C01B10.5a.1	No miss exon.	No extra exon.	d60c84e9-f229-4061-846c-4908acc519f9
C01B10.5_NP23	C01B10.5	41.7459	40.0535	1.6924	0	2794.35	2695.48	98.8696	0	0.0148595	0.0171175	NA	Missing_UTR	C01B10.5a.1	No miss exon.	No extra exon.	df31e25f-3795-443f-8040-0e430304629b
C01B10.5_NP24	C01B10.5	26.8933	25.8553	1.03799	0	2794.35	2695.48	98.8696	0	0.00959211	0.0104986	NA	Missing_UTR	C01B10.5a.1	No miss exon.	No extra exon.	e4907700-3e07-4022-8778-4bef9161afa7
C01B10.5_NP25	C01B10.5	331.592	320.291	11.3011	0	2794.35	2695.48	98.8696	0	0.118825	0.114303	NA	3'missing	C01B10.5e.1	5 primer miss: exon 1 to 1;3 primer miss: exon 2 to 2	No extra exon.	e951ab5f-3a09-41a9-ad14-bf2ff8a2addc
C01B10.5_NP26	C01B10.5	66.8213	64.7546	2.06664	0	2794.35	2695.48	98.8696	0	0.0240234	0.0209026	NA	3'missing	C01B10.5e.1	5 primer miss: exon 1 to 1;3 primer miss: exon 2 to 2	No extra exon.	f23a8858-73bf-49d0-8cc1-5e2f85780026
C01B10.5_NP27	C01B10.5	109.335	106.523	2.81195	0	2794.35	2695.48	98.8696	0	0.0395193	0.028441	NA	Missing_UTR	C01B10.5a.1	No miss exon.	No extra exon.	f57bbecc-427c-46af-93a9-8b5d6e9a0fbd
C01B10.5_NP28	C01B10.5	26.093	25.3141	0.778895	0	2794.35	2695.48	98.8696	0	0.00939132	0.007878	NA	3'extra	C01B10.5a.1	No miss exon.	3 primer extra: exon 4 to 4	f652945d-1e5a-48cf-9784-5dec25d217fe
C01B10.6_NP1	C01B10.6	9.16771	0.95497	1.33696	6.87578	120.732	13.4071	14.2689	93.0556	0.0712284	0.0936976	0.0738889	Extra_UTR	C01B10.6a.1	No miss exon.	No extra exon.	072d01ce-2bd3-4870-bd65-4574384ea5c7
C01B10.6_NP1	C01B10.6	8.37167	0.727972	1.27395	6.36975	120.732	13.4071	14.2689	93.0556	0.0542973	0.0892819	0.068451	Extra_UTR	C01B10.6a.1	No miss exon.	No extra exon.	6bbb5430-518a-4f4c-97f2-10e2a6ceb3e4
C01B10.6_NP2	C01B10.6	10.3618	0.845858	1.48025	8.03565	120.732	13.4071	14.2689	93.0556	0.0630901	0.10374	0.0863532	Intron_retention	C01B10.6a.1	Intron retention: intron 8 to 8	No extra exon.	7f35c935-6468-48aa-b428-abbd9e081b11
C01B10.6_NP3	C01B10.6	19.3171	1.39979	1.95971	15.9576	120.732	13.4071	14.2689	93.0556	0.104406	0.137342	0.171485	Intron_retention	C01B10.6a.1	Intron retention: intron 12 to 12	No extra exon.	8012d2b4-5214-46e6-9a68-19dcbcb3e13a
C01B10.6_NP4	C01B10.6	23.9606	1.33115	2.66229	19.9672	120.732	13.4071	14.2689	93.0556	0.0992864	0.186581	0.214573	Intron_retention	C01B10.6a.1	Intron retention: intron 8 to 8	No extra exon.	c1d96fe2-a10e-4d3a-8684-05557f045c8d
C01B10.6_NP5	C01B10.6	21.9706	1.85667	2.16611	17.9478	120.732	13.4071	14.2689	93.0556	0.138483	0.151807	0.192872	Extra_UTR	C01B10.6a.1	No miss exon.	No extra exon.	e30e336d-789b-4e58-b5d5-2e3986763f73
C01B10.8_NP1	C01B10.8	6.95775	1.98793	2.31925	2.65057	224.714	50.874	52.6356	121.204	0.0390755	0.0440624	0.0218686	5'missing	C01B10.8.1	5 primer miss: exon 1 to 6	No extra exon.	04cc3917-75d7-4571-ad30-f586ba0e3543
C01B10.8_NP1	C01B10.8	10.2746	2.99675	2.99675	4.28106	224.714	50.874	52.6356	121.204	0.0589052	0.0569338	0.0353211	5'missing	C01B10.8.1	5 primer miss: exon 1 to 1	No extra exon.	05b18b97-4baa-4219-9db8-5fc5a826d056
C01B10.8_NP2	C01B10.8	64.1394	12.4873	13.6225	38.0296	224.714	50.874	52.6356	121.204	0.245456	0.258808	0.313764	Missing_UTR	C01B10.8.1	No miss exon.	No extra exon.	78fbb368-f414-4697-a885-4b375b644dcb
C01B10.8_NP3	C01B10.8	6.41248	0	1.06875	5.34374	224.714	50.874	52.6356	121.204	0	0.0203046	0.0440887	Intron_retention	C01B10.8.1	Intron retention: intron 9 to 9	No extra exon.	c3d04d9f-37b2-48d3-ac18-e1cc4a7cc93b
C01B10.8_NP4	C01B10.8	10.423	3.64806	1.0423	5.73266	224.714	50.874	52.6356	121.204	0.0717076	0.0198022	0.0472975	3'missing	C01B10.8.1	5 primer miss: exon 1 to 1;3 primer miss: exon 9 to 12	No extra exon.	f478fbbb-5125-4c9f-b3b9-9024532d6c8c
C01B10.8_NP5	C01B10.8	32.0928	10.3525	11.3878	10.3525	224.714	50.874	52.6356	121.204	0.203493	0.216351	0.0854138	5'missing	C01B10.8.1	5 primer miss: exon 1 to 1	No extra exon.	fa6fa9da-5b9c-47f6-9a02-8aa36627547e
C01B10.9_NP1	C01B10.9	15.8275	5.9353	2.37412	7.51805	237.908	54.3859	60.8714	122.651	0.109133	0.0390022	0.0612965	5'missing	C01B10.9.1	5 primer miss: exon 1 to 2	No extra exon.	2100700d-87e5-43c9-9635-3901adcd5361
C01B10.9_NP1	C01B10.9	5.94339	2.3349	0.636792	2.9717	237.908	54.3859	60.8714	122.651	0.0429322	0.0104613	0.024229	5'missing	C01B10.9.1	5 primer miss: exon 1 to 4	No extra exon.	5e0b2a65-77f0-46de-b76f-4589b19390b0
C01B10.9_NP2	C01B10.9	8.66317	3.31239	1.274	4.07679	237.908	54.3859	60.8714	122.651	0.0609053	0.0209293	0.033239	Intron_retention	C01B10.9.1	Intron retention: intron 7 to 7	No extra exon.	96733e19-5a4b-4eab-8826-fde48b85e7c7
C01B10.9_NP3	C01B10.9	12.179	5.34687	1.78229	5.04982	237.908	54.3859	60.8714	122.651	0.0983136	0.0292796	0.0411724	5'missing	C01B10.9.1	5 primer miss: exon 1 to 1	No extra exon.	b1553081-7a40-4ca1-ae1b-3f2cab58ff66
C01B10.9_NP4	C01B10.9	141.534	28.1363	36.6625	76.7355	237.908	54.3859	60.8714	122.651	0.517346	0.602294	0.625643	Intron_retention	C01B10.9.1	Intron retention: intron 6 to 6	No extra exon.	ff37999f-04cf-466b-8449-94e067e33dba
C01B12.1_NP1	C01B12.1	26.3269	0.431589	20.7163	5.17906	108.556	2.49553	82.708	23.3529	0.172945	0.250475	0.221774	Missing_UTR	C01B12.1.1	No miss exon.	No extra exon.	03d1be62-6ab7-4cd4-a9ca-400431216a74
C01B12.1_NP1	C01B12.1	11.733	1.1733	8.21308	2.3466	108.556	2.49553	82.708	23.3529	0.47016	0.0993022	0.100484	3'missing	C01B12.1.1	3 primer miss: exon 3 to 3	No extra exon.	0a39c466-fc89-4d29-ac65-644e804dc703
C01B12.1_NP2	C01B12.1	5.32049	0	4.13816	1.18233	108.556	2.49553	82.708	23.3529	0	0.0500334	0.0506289	5'missing	C01B12.1.1	5 primer miss: exon 1 to 1	No extra exon.	3660c6b8-c59c-4093-b560-430986d23efe
C01B12.1_NP3	C01B12.1	29.2015	0.442447	23.0072	5.7518	108.556	2.49553	82.708	23.3529	0.177296	0.278174	0.2463	Extra_UTR	C01B12.1.1	No miss exon.	No extra exon.	9fc6bf1c-8765-48ab-a009-6a863d5267f0
C01B12.2_NP1	C01B12.2	15.9379	6.0716	6.0716	3.79475	168.922	78.2299	61.7062	28.9861	0.0776122	0.0983953	0.130916	5'missing	C01B12.2.1	5 primer miss: exon 1 to 1	No extra exon.	19316a9e-c02a-4357-9058-c38a9fb6e908
C01B12.2_NP1	C01B12.2	5.23204	2.61602	1.74401	0.872007	168.922	78.2299	61.7062	28.9861	0.0334402	0.0282632	0.0300836	Intron_retention	C01B12.2.1	Intron retention: intron 2 to 2;3 primer miss: exon 5 to 5	No extra exon.	23c04b53-caaa-487f-864e-042bdbb6ead9
C01B12.2_NP2	C01B12.2	5.01461	2.65479	1.17991	1.17991	168.922	78.2299	61.7062	28.9861	0.0339358	0.0191214	0.0407059	Intron_retention	C01B12.2.1	Intron retention: intron 3 to 3	No extra exon.	74d836eb-838e-4fa8-870e-8d5fad5aa166
C01B12.2_NP3	C01B12.2	8.8621	3.93871	2.62581	2.29758	168.922	78.2299	61.7062	28.9861	0.0503479	0.0425534	0.0792648	5'missing	C01B12.2.1	5 primer miss: exon 1 to 1	No extra exon.	7e66a72a-67d1-460d-b814-3860b3baf2b7
C01B12.2_NP4	C01B12.2	70.1566	32.1278	26.2268	11.802	168.922	78.2299	61.7062	28.9861	0.410684	0.425027	0.407162	Extra_UTR	C01B12.2.1	No miss exon.	No extra exon.	80ad5b19-867f-4e8e-bd56-87896f47a6b3
C01B12.2_NP5	C01B12.2	14.4343	5.86395	4.9618	3.60858	168.922	78.2299	61.7062	28.9861	0.0749579	0.0804101	0.124493	Intron_retention	C01B12.2.1	Intron retention: intron 2 to 2	No extra exon.	da6c1a17-55fb-4c3f-a9f0-db77c71b4e01
C01B12.3_NP1	C01B12.3	12.9134	5.53432	4.61193	2.76716	45.2949	21.1485	15.2996	8.84677	0.261688	0.301442	0.312788	5'missing	C01B12.3.1	5 primer miss: exon 1 to 1	No extra exon.	2089ebb6-96a0-4ee8-a596-2850426e7134
C01B12.3_NP1	C01B12.3	7.67919	4.44585	2.02084	1.2125	45.2949	21.1485	15.2996	8.84677	0.21022	0.132085	0.137056	5'missing	C01B12.3.1	5 primer miss: exon 1 to 2	No extra exon.	2c658f97-98e9-458c-8dce-0db53127ac72
C01B12.3_NP2	C01B12.3	6.02079	3.34488	1.67244	1.00346	45.2949	21.1485	15.2996	8.84677	0.158161	0.109313	0.113427	5'missing	C01B12.3.1	5 primer miss: exon 1 to 3	No extra exon.	5f5f370e-a8b8-4076-9e1a-5d7ed252de19
C01B12.4_NP1	C01B12.4	7.96033	0	4.9752	2.98512	15.9207	1.41517	8.15933	6.34615	0	0.609756	0.470383	5'missing	C01B12.4.1	5 primer miss: exon 1 to 1	No extra exon.	cf75ae29-f895-4d39-867a-3da8a3b80472
C01B12.4_NP1	C01B12.4	5.30688	0.884481	2.65344	1.76896	15.9207	1.41517	8.15933	6.34615	0.625	0.325203	0.278746	3'missing	C01B12.4.1	5 primer miss: exon 1 to 6;3 primer miss: exon 2 to 7	No extra exon.	f0758411-8e39-4af5-b675-230062aef725
C01B12.5_NP1	C01B12.5	6.63361	0	6.63361	0	10.6138	1.32672	7.96033	1.32672	0	0.833333	0	3'missing	C01B12.5.1	3 primer miss: exon 9 to 9	No extra exon.	171ce82f-c3f2-4bbc-8855-6443be941e16
C01B12.8_NP1	C01B12.8	74.2537	26.5192	2.94658	44.788	195.444	71.5245	9.67344	114.246	0.370771	0.304605	0.392029	Missing_UTR	C01B12.8.1	No miss exon.	No extra exon.	0cc4a5cd-ce82-484e-8f68-9daa73337ecc
C01B12.8_NP1	C01B12.8	11.0929	4.43714	1.10929	5.54643	195.444	71.5245	9.67344	114.246	0.0620367	0.114673	0.0485479	5'missing	C01B12.8.1	5 primer miss: exon 1 to 1	No extra exon.	1e96d0f0-fea7-419e-8002-a241cc85bb21
C01B12.8_NP2	C01B12.8	5.47799	0.912998	0.304333	4.26066	195.444	71.5245	9.67344	114.246	0.0127648	0.0314606	0.0372936	3'missing	C01B12.8.1	3 primer miss: exon 4 to 4	No extra exon.	296a1c3e-3dc5-486b-96d5-132c79ba8e75
C01B12.8_NP3	C01B12.8	74.5117	26.2623	3.66451	44.5849	195.444	71.5245	9.67344	114.246	0.367179	0.378822	0.390252	Intron_retention	C01B12.8.1	Intron retention: intron 2 to 2	No extra exon.	45bd9f09-a674-427b-8ae7-28aba51b553d
C01B12.8_NP4	C01B12.8	11.5588	2.627	0.5254	8.4064	195.444	71.5245	9.67344	114.246	0.0367286	0.0543136	0.0735812	Missing_UTR	C01B12.8.1	No miss exon.	No extra exon.	bda807bb-d1bf-4ad8-8ebc-78f4a90e2d9b
C01B12.8_NP5	C01B12.8	9.83406	5.15117	0.468288	4.2146	195.444	71.5245	9.67344	114.246	0.0720197	0.0484097	0.0368904	Missing_UTR	C01B12.8.1	No miss exon.	No extra exon.	f69271a4-237e-410c-b24e-838d730fb0a5
C01B12.9_NP1	C01B12.9	12.6038	6.30192	4.20128	2.10064	15.2573	7.62865	4.20128	3.42736	0.826087	1	0.612903	Extra_UTR	C01B12.9	No miss exon.	No extra exon.	77b3f8ae-e44d-43e0-9810-cbc6978484b6
[truncated: 55,635 more rows]
