# Supplementary material for: Direct full-length RNA sequencing reveals unexpected transcriptome complexity during Caenorhabditis elegans development
Source: HighWire-hosted journal article supplement (doi:10.1101/gr.251512.119), 2020-02-01
Supplement: Supplemental_Table_S4.xlsx [file Supplemental_Table_S4.xlsx]

## Sheet: Table_S4
Table S4 List of reads that overlap with existing exonic regions not more than 50 nt
chrI	Start	End	Read name	SL score	Strand	Exon #	Exon length	Exon start	Read origin
chrI	2439	2744	58a5584a-c1d5-4b31-81b6-34924491d6d9	8	+	1	305,	0,	EMB
chrI	4116	4360	ef6631d5-c4be-4bae-ac28-0ba6331a9665	6	-	1	244,	0,	YA
chrI	4119	4371	e79f543e-2dde-490a-b07d-f315307fa5be	6	-	1	252,	0,	YA
chrI	4119	4348	3ba9e1c1-62fe-4ce5-8e92-eac2cebd74de	6	-	1	229,	0,	YA
chrI	14939	15160	31e02568-e264-4407-b8c4-664b14f51077	12	+	1	221,	0,	L1
chrI	14944	15155	b9661b0c-722b-4811-a0c0-e5dc8275902d	12	+	1	211,	0,	L1
chrI	14949	15154	1fe036ea-4293-4547-ac9e-56b2950d1c1d	10	+	1	205,	0,	L1
chrI	14949	15156	2419465d-3c47-4b2e-9720-24f3c1b18db7	11	+	1	207,	0,	L1
chrI	14953	15160	7d51fa13-8fcf-4536-bf3b-8b567a046a83	8	+	1	207,	0,	L1
chrI	14969	15160	b54f8364-047a-4421-b829-c999bba5433d	10	+	1	191,	0,	L1
chrI	16419	16598	d3847d28-a43d-4ce1-b974-c269f9ed01c2	12	-	1	179,	0,	EMB
chrI	16581	16791	3679b21f-3dfe-4e77-a620-3449d85b2a15	10	+	1	210,	0,	L1
chrI	16591	16837	bef602ee-01e6-40ab-a061-2c01265c5022	8	+	1	246,	0,	none
chrI	16592	16838	dc5a8f3a-cc34-4161-9f8c-66fb2991276a	8	+	1	246,	0,	L1
chrI	16593	16840	1f5c9916-fb82-4c70-ae26-291bac2fa139	9	+	1	247,	0,	YA
chrI	16600	16833	8e161f5d-f578-4cd7-ae54-fc838230e419	17	+	1	233,	0,	L1
chrI	16608	16837	3415969c-d836-4e8e-83dd-10d89724947a	8	+	1	229,	0,	YA
chrI	16633	16837	5848a914-c479-407f-a2f3-aa33828edc8d	6	+	1	204,	0,	YA
chrI	16641	16837	80419faa-2701-4688-abfe-077e90a0882a	8	+	1	196,	0,	L1
chrI	16655	16845	dd7de962-f8cb-43a6-a5ef-7cb1391ba91d	8	+	1	190,	0,	YA
chrI	16658	16837	906b3a94-79a5-4f30-95ce-e275fc085523	13	+	1	179,	0,	L1
chrI	27587	27810	c1c06148-f456-444d-a1a2-4971644f4e55	13	-	1	223,	0,	L1
chrI	77383	77684	a0389a66-1faa-46d5-80db-58a402544de1	8	+	1	301,	0,	EMB
chrI	80637	81052	d7c7f2e1-2de8-444d-bcdf-d66af0bf1c9e	10	+	1	415,	0,	EMB
chrI	80637	81034	f0089d03-46b4-4317-8347-49b751403501	10	+	1	397,	0,	EMB
chrI	80638	81065	b985fedb-6df7-48f6-b64f-b2d937c94638	8	+	1	427,	0,	EMB
chrI	80643	81067	3080be34-de61-4f55-81cf-7048e84c3acf	8	+	1	424,	0,	EMB
chrI	80649	81069	8c1f959d-1b01-488b-8892-093591018db4	6	+	1	420,	0,	EMB
chrI	80650	80991	2236da6f-24b5-43b1-b943-e0df43a4a117	6	+	1	341,	0,	EMB
chrI	80654	81058	d11c5ebd-f862-4ebb-9744-bec00e6245c8	7	+	1	404,	0,	YA
chrI	80665	80994	52a65b31-5c01-49e9-8be7-5d743ef1f61f	6	+	1	329,	0,	EMB
chrI	80667	81014	76c585c6-a51b-4683-b50b-5d2c51710e9b	6	+	1	347,	0,	EMB
chrI	80673	81052	fa7bed0c-76e0-48d6-ac8d-d8d378299f18	6	+	1	379,	0,	EMB
chrI	80683	81068	90900a7e-d116-476c-bdd5-8029265e08aa	6	+	1	385,	0,	EMB
chrI	80686	81068	1b90c413-624f-45fd-bee4-dd2d11e62041	10	+	1	382,	0,	YA
chrI	80691	81061	e80ed89c-8d17-49eb-b78c-2fa2459a2ace	8	+	1	370,	0,	YA
chrI	80695	81058	3fc1ce03-2141-4679-b7d7-68fec3594c8c	6	+	1	363,	0,	EMB
chrI	80712	81060	b99da0f0-1af5-49a4-9dff-a65b332efc38	9	+	1	348,	0,	EMB
chrI	80723	81021	fb360819-acdf-4bf3-b91a-33004db483ca	7	+	1	298,	0,	EMB
chrI	80727	81068	0965d251-5d31-45ef-b338-0a2d60ca40a9	8	+	1	341,	0,	EMB
chrI	80751	81053	87784b93-bc76-4e50-9839-654796cf7aa6	8	+	1	302,	0,	EMB
chrI	80777	81068	a9640b4f-5044-45d7-bbcd-5bda16ffbfb0	8	+	1	291,	0,	EMB
chrI	80779	81061	3e5958d7-a9fc-49dd-aea7-21782ad1c9a5	8	+	1	282,	0,	EMB
chrI	80789	81061	35cdb7bc-4fb1-43f6-9898-8afc0b0c6800	6	+	1	272,	0,	YA
chrI	80810	81061	efa7da01-0255-4366-aadc-70c11027781a	10	+	1	251,	0,	EMB
chrI	80826	81051	187499a1-b311-41bd-9928-4e5cc6931c10	8	+	1	225,	0,	EMB
chrI	90452	91287	615b6d55-34bd-41ed-97c1-53b537fd573f	8	+	1	835,	0,	EMB
chrI	90454	91271	c782cdee-2120-4294-be62-9bddfbf0f9e7	7	+	1	817,	0,	YA
chrI	90468	91273	47ab0fbe-06b2-4974-9c97-08dedad3abda	9	+	1	805,	0,	EMB
chrI	90491	91285	7b41c4e0-708b-483a-a267-72689493394c	9	+	1	794,	0,	L1
chrI	90552	91145	9de9ca2f-94fe-4412-92f2-57eb391d50f4	6	+	1	593,	0,	EMB
chrI	90633	91277	cbe7dc10-7150-4922-a6e0-3d79f7ca497e	9	+	1	644,	0,	EMB
chrI	90715	91218	9d2ec532-8b29-4234-8d40-aa74503ae28c	10	+	1	503,	0,	YA
chrI	90788	91256	040eb0dd-bc1c-442d-9628-9b055beca3d4	8	+	1	468,	0,	EMB
chrI	90824	91285	d0f9897c-aa59-46ca-88a3-1a348bdcfcbb	4	+	1	461,	0,	EMB
chrI	90862	91293	d0e417a3-b52d-4167-9f05-40de3099cac1	6	+	1	431,	0,	YA
chrI	90938	91294	c14435b4-edbb-444f-bdb4-f74a2be73875	8	+	1	356,	0,	YA
chrI	90949	91288	63bf022c-7472-4768-bf7c-984c0e1aaf99	8	+	1	339,	0,	YA
chrI	96470	96989	0143edd2-d7a6-4afc-88d3-b914b9f297e3	8	-	1	519,	0,	YA
chrI	96475	96694	66442bea-987c-44aa-980b-52f0d5efde78	6	-	1	219,	0,	YA
chrI	96477	96993	3ac1eb47-f5ae-476b-afc4-7733ee3b9a03	6	-	1	516,	0,	YA
chrI	96479	96993	ddf90dfd-a20e-4e62-9085-6c1037ce5e8c	16	-	1	514,	0,	L1
chrI	96482	96753	5b2fab1d-0258-49bb-9b02-4bb455773c7f	6	-	1	271,	0,	EMB
chrI	96483	96954	4eee3ab3-2e3b-45cc-9e63-46aea3b203ff	6	-	1	471,	0,	YA
chrI	98501	99058	46224b9c-cb6f-4199-8e63-c3fd1abbc584	8	-	1	557,	0,	EMB
chrI	100672	101148	c667a7ba-910a-4960-800b-2929b4259b3d	10	-	1	476,	0,	EMB
chrI	107355	107473	15417e98-81ce-4ec5-a31c-b7bb4a1d01a9	6	-	1	118,	0,	EMB
chrI	110824	111008	5b00c032-cf3a-448d-b07f-342227afd055	8	+	1	184,	0,	YA
chrI	114960	115537	171d8f14-6e38-4873-9538-c8f907a16a8a	10	+	1	577,	0,	L1
chrI	133974	134243	1b3d7945-4c97-4889-986a-4903a4856aa6	6	+	1	269,	0,	EMB
chrI	133978	134213	9926c45b-69b2-4154-8b7d-0738f3285c81	4	+	1	235,	0,	YA
chrI	133987	134269	0ade824c-10d5-4ccb-968e-4c3f67de5de3	8	+	1	282,	0,	YA
chrI	133988	134267	cf423973-4de3-4dd7-b8b2-09fadc455ac3	6	+	1	279,	0,	YA
chrI	133994	134263	32f0b2d2-60a9-4c3b-b1b5-2e9b05eb5100	7	+	1	269,	0,	EMB
chrI	133994	134269	61ee093d-04c2-403d-be72-523989b81fe5	7	+	1	275,	0,	YA
chrI	133994	134267	cbb61675-b6fc-47bd-8de1-acb625763f00	8	+	1	273,	0,	YA
chrI	133995	134267	423e5736-fd32-4b0e-aea1-8291d9a6cab8	6	+	1	272,	0,	YA
chrI	133996	134269	a45be7ae-ae0e-49f5-bc39-3ed60f6f3ca5	6	+	1	273,	0,	EMB
chrI	134014	134271	ad99d246-aadb-4c33-9109-9985e0c45b0d	8	+	1	257,	0,	EMB
chrI	134035	134268	d79885dd-2395-4350-abc2-6baabd0bfc3e	4	+	1	233,	0,	EMB
chrI	146483	146750	eb9e879f-ef69-436b-acf0-af1d42fcf7ea	6	-	1	267,	0,	EMB
chrI	146538	146722	12bcc228-47b4-4eb7-bc6f-abf0b2c8b13a	10	-	1	184,	0,	EMB
chrI	146550	146924	738b398f-bd9a-4604-8cb0-0a59d83a467c	10	-	2	198,132,	0,242,	L1
chrI	207073	208373	df24f5a1-6b38-43b1-aff0-b824ef483420	6	+	2	238,670,	0,630,	EMB
chrI	207073	208384	47f7e1e4-f711-44e0-806d-c6e57c6b5592	10	+	2	238,681,	0,630,	YA
chrI	207108	208382	c715a2de-57eb-4871-903a-47df7fb7b4f6	10	+	2	203,679,	0,595,	EMB
chrI	207144	208390	88801e2c-211b-46bb-a97b-00f97de1a6e5	8	+	2	167,687,	0,559,	L1
chrI	207221	208274	042bf43e-331d-482d-85d2-613542a38067	11	+	2	90,571,	0,482,	L1
chrI	207232	208468	8ac07188-3c86-4e66-b0e9-66644398a1d0	8	+	2	79,765,	0,471,	EMB
chrI	207701	208384	63898f33-257e-49c6-9f0a-7e412d33a09f	14	+	1	683,	0,	L1
chrI	207729	207986	4e3d3854-c5a3-4b0c-9bf3-d9f5c02c13f0	8	+	1	257,	0,	EMB
chrI	208157	208388	bccf7ebe-29ec-4506-b62d-1163e4ce35da	6	+	1	231,	0,	EMB
chrI	211663	211933	f3812d6d-de38-43e1-a939-f69a0366ca53	6	-	1	270,	0,	YA
chrI	219090	219369	eb7cb205-397d-46c8-abb2-c0cd18f6586b	12	-	1	279,	0,	L1
chrI	219104	219541	9ef03059-69e0-49a2-8a3c-e691b4ce52cd	8	-	1	437,	0,	YA
chrI	219106	219715	7cf6bf75-5693-4186-89f9-888e52175346	8	-	1	609,	0,	YA
chrI	219110	219481	27c4433f-7276-4450-a1b3-c5816a41014b	6	-	1	371,	0,	YA
chrI	229071	229956	f7c58af5-4fdf-4d71-9f1b-9c82a481fe73	6	-	1	885,	0,	EMB
chrI	237605	237854	17f4f1f1-4ad2-4890-a258-aa7f713662e7	8	-	1	249,	0,	none
chrI	254338	254571	dd216f72-aaff-40fd-8aad-c3b84ae8076b	14	-	1	233,	0,	L1
chrI	254344	254579	d3d27796-35e5-45c7-8cc4-e316e1488326	6	-	1	235,	0,	none
chrI	254477	254714	c35d3025-7c72-4fc6-a463-4ed37223147a	6	-	1	237,	0,	YA
chrI	311324	311515	c8105f32-3b96-46b3-a76a-af43841faa90	11	-	1	191,	0,	L1
chrI	328715	329050	2f10657d-cca3-4aec-b7de-d2f5cced2adc	10	-	1	335,	0,	EMB
chrI	337577	337845	19d6a0a4-d173-4885-8328-0e1236f837ab	8	+	1	268,	0,	EMB
chrI	343279	343479	5ff8a18c-8f34-48a1-875a-69374aa9ea48	6	-	1	200,	0,	YA
chrI	356869	357082	1620aa99-e51a-4ea4-b7ec-96a486834e34	8	+	2	75,89,	0,124,	L1
chrI	357167	357313	6b43c05a-f6ae-4b12-84f9-f918ae05a80c	9	-	1	146,	0,	YA
chrI	368288	368471	6881647a-d4ad-4814-9860-3c9a67e67f5c	11	-	1	183,	0,	L1
chrI	379474	379604	82c1115c-788f-409b-9ebf-8add279bc658	8	-	1	130,	0,	YA
chrI	412550	412918	ee2cfa6f-7d4c-4464-bae9-f65031f6751e	6	+	1	368,	0,	YA
chrI	456927	457314	c0924f56-8ede-45b5-a1ec-54734944b77d	8	+	2	67,79,	0,308,	EMB
chrI	461004	461424	2485872e-d05a-4f39-9648-f36a4086f531	6	+	1	420,	0,	EMB
chrI	461016	461603	287bf8d6-0b6d-49ed-901c-f91be6e8b9a7	5	+	1	587,	0,	EMB
chrI	461019	461586	4aa40bc9-649e-46a3-9b54-93f3db57bf93	6	+	1	567,	0,	EMB
chrI	461177	461571	e43342de-2301-462b-87cd-2814368c8a48	6	+	1	394,	0,	EMB
chrI	461312	461607	43470197-a160-4882-9103-26fa9a30071e	4	+	1	295,	0,	EMB
chrI	461402	461611	3681dd54-60ef-4034-b84d-2ba557f9ac05	9	+	1	209,	0,	EMB
chrI	461645	461956	bf2e9a79-df3d-4902-92c6-d1da1a8d60d2	9	+	1	311,	0,	EMB
chrI	495939	496154	acaed781-dbc3-4584-89ce-c7638193dd91	11	+	1	215,	0,	YA
chrI	505038	505190	9ba0cbbd-0e7c-4269-92d1-99764582742e	15	-	1	152,	0,	YA
chrI	512495	512690	176423f2-e9b1-4f65-8deb-da337c117b38	10	-	1	195,	0,	L1
chrI	517675	518030	9a13d514-9ac2-41a0-aec3-b6355e9cb818	8	-	1	355,	0,	YA
chrI	533024	533307	5569d60f-346d-4a0a-884c-989f38c75d93	16	+	1	283,	0,	EMB
chrI	533025	533307	344143a5-5d27-4ed8-8567-f46fdd41b86c	12	+	1	282,	0,	EMB
chrI	533033	533309	6ac9d31c-d2d0-44c0-9acb-94e7994577f2	10	+	1	276,	0,	EMB
chrI	533079	533302	05a8b495-fe4a-48a6-97dd-6f42dba9698c	8	+	1	223,	0,	EMB
chrI	533081	533311	65795eca-b9fa-4fd5-9d5a-2b71b9088707	14	+	1	230,	0,	EMB
chrI	533081	533258	e2a4854d-0bcc-421b-9b0d-cc7bf8faa3bc	6	+	1	177,	0,	EMB
chrI	533081	533307	9d7b08a3-7927-480d-82a9-3ce017db097c	8	+	1	226,	0,	L1
chrI	533082	533309	df712c16-835d-4de2-95ad-b656759c0266	10	+	1	227,	0,	EMB
chrI	533082	533280	9224f701-5e71-48ff-889f-fa3f939eedbe	6	+	1	198,	0,	EMB
chrI	533082	533284	7b7b67eb-c531-4413-8b48-dbb94bc4df33	15	+	1	202,	0,	EMB
chrI	533083	533277	76523d80-19e5-45c8-9407-7480c177331d	13	+	1	194,	0,	EMB
chrI	533083	533308	2f986e4b-e910-43c7-9d46-e330a329f252	13	+	1	225,	0,	EMB
chrI	533084	533307	808060a4-49ff-453e-a35e-5349f785175a	8	+	1	223,	0,	EMB
chrI	533084	533309	ec982d52-1b0d-43a4-b0d0-d1c5519dbcd9	6	+	1	225,	0,	EMB
chrI	533084	533307	3ecd2418-30b5-4912-bbcc-2d072a66b23b	6	+	1	223,	0,	EMB
chrI	533084	533283	f8cdc667-1fd8-4e59-8346-a20160ad4ef6	11	+	1	199,	0,	EMB
chrI	533084	533302	47e29fcb-de12-465b-b940-fa02c6e4a047	12	+	1	218,	0,	EMB
chrI	533084	533308	8c7d73fd-1846-4fd4-99dd-bdf46e06c0fa	10	+	1	224,	0,	EMB
chrI	533084	533302	687d5eeb-40a2-4f5d-8a1d-5e1e2a006f87	10	+	1	218,	0,	EMB
chrI	533084	533280	144f2220-782d-4c85-a3ee-b6ccbecd2783	14	+	1	196,	0,	EMB
chrI	533084	533309	ca261561-c0e4-4945-a9c0-3cb460ac4a8c	10	+	1	225,	0,	EMB
chrI	533085	533309	bbae33dc-82f0-4313-a27a-0b9452239919	8	+	1	224,	0,	EMB
chrI	533085	533307	893ef586-3881-4e7e-9bc7-880b0584d46a	15	+	1	222,	0,	EMB
chrI	533085	533308	041457b7-f1bc-4491-a309-d35a938bbd6d	13	+	1	223,	0,	EMB
chrI	533085	533293	b66b4d5e-9091-4475-b619-31e78943a59e	9	+	1	208,	0,	EMB
chrI	533085	533311	943905b1-9b2b-4aa6-b217-4f597e4f46f8	8	+	1	226,	0,	EMB
chrI	533085	533302	a4db5b5a-01a0-48fd-816a-725d94e85f17	8	+	1	217,	0,	L1
chrI	533088	533302	967ab68f-25d3-4d09-8622-27f1bc740d72	10	+	1	214,	0,	EMB
chrI	533091	533276	5fa7463d-2e8c-45f9-b08f-211e1a419d19	12	+	1	185,	0,	EMB
chrI	533091	533296	62e793c2-b596-417a-ac1d-8a303244fe06	12	+	1	205,	0,	EMB
chrI	533091	533296	76682f8a-f3c2-498c-a698-086e67fbd030	11	+	1	205,	0,	EMB
chrI	533091	533311	b858d01b-92be-4d72-b89e-c9a6d1e69762	10	+	1	220,	0,	EMB
chrI	533092	533308	40b6f8e6-a8d0-4b39-8abf-84a33b00d38b	12	+	1	216,	0,	EMB
chrI	533093	533307	a7647fe3-a570-4f8a-8616-59bc22596580	11	+	1	214,	0,	EMB
chrI	533093	533308	3708cd14-64a7-454b-be08-6d5bef247ef3	10	+	1	215,	0,	EMB
chrI	533093	533308	a4b0b9cd-fd36-4163-a5ad-49a1245809ce	6	+	1	215,	0,	EMB
chrI	533094	533259	4a896d6c-343d-4c2b-81b3-f95e350abb13	9	+	1	165,	0,	EMB
chrI	533094	533299	ce500e2c-3316-4f7e-b969-7be40de0527f	13	+	1	205,	0,	EMB
chrI	533094	533307	e155d7a4-d20f-4f93-93be-a08e87e5f0ee	9	+	1	213,	0,	EMB
chrI	533099	533307	8ac9d8c2-83d1-48c6-bf5d-c74077713532	14	+	1	208,	0,	EMB
chrI	533100	533273	a76bb709-3544-47a0-998f-ea65e63c151a	6	+	1	173,	0,	EMB
chrI	533103	533309	115f8116-c97c-4ab9-9eaa-c54f02934501	7	+	1	206,	0,	EMB
chrI	533104	533301	9efbb1cc-d02e-479d-9b9e-e4640b4a3f61	4	+	1	197,	0,	EMB
chrI	533104	533255	6e1f4619-62de-4229-8f83-99617ee54a38	14	+	1	151,	0,	EMB
chrI	533105	533308	7b8d60a5-9af8-4896-a183-3ba6c7e998c3	9	+	1	203,	0,	EMB
chrI	533107	533308	ddf6812e-ee91-47fa-a555-0a6d61033dea	12	+	1	201,	0,	EMB
chrI	533107	533302	5d77c14e-6cc1-40bb-82f7-ff6b714331e6	10	+	1	195,	0,	EMB
chrI	533114	533311	a689ddb0-1e85-496b-a3f3-e3fcabea1ba1	11	+	1	197,	0,	EMB
chrI	533130	533307	c5a6948e-8e3f-47c9-90c8-75105993068e	8	+	1	177,	0,	EMB
chrI	541415	542198	c2f38dab-6975-4415-9286-e3d96c114eee	6	+	1	783,	0,	YA
chrI	541422	542192	d1d4dc25-6eaf-4a2d-b689-d535385f735d	8	+	1	770,	0,	YA
chrI	541465	542198	86046b6b-e7fd-4599-8dba-c790bbe9fb2f	6	+	1	733,	0,	YA
chrI	541484	542204	dff8e668-96c3-44dd-aeaf-7a46e2c254ad	10	+	1	720,	0,	L1
chrI	541529	542132	86fc03ca-50eb-41be-8ea4-c94c1350010f	9	+	1	603,	0,	L1
chrI	541534	542198	e681a31b-bd21-4acc-9413-420159b011ee	6	+	1	664,	0,	YA
chrI	541548	542203	d68ff4f7-5f20-4d39-bd83-845ba8aed3cf	8	+	1	655,	0,	EMB
chrI	541552	542203	03b95320-6c26-4598-9117-03575675a241	12	+	1	651,	0,	EMB
chrI	541553	542194	fe16d4d3-57c3-4ae1-b514-ea59b3cac3a9	6	+	1	641,	0,	EMB
chrI	541561	542198	245c9ae5-d4bf-438a-8eaa-0d4c988c8354	7	+	1	637,	0,	YA
chrI	541579	542205	0331a911-47f4-4376-8a52-cd1c3ecf1bd4	8	+	1	626,	0,	L1
chrI	541598	542203	5ffb953f-f157-4bcd-bd12-2dbcf441691e	6	+	1	605,	0,	L1
chrI	541663	542198	b822a4f8-f935-4b4a-8ef5-e9c1628a2c89	4	+	1	535,	0,	EMB
chrI	541679	542178	dc18bdba-5d8d-4798-9f51-28bb0e4d7445	8	+	1	499,	0,	YA
chrI	541763	542196	d3da3464-f59f-4e1e-ac56-a225dbc0638a	6	+	1	433,	0,	EMB
chrI	541763	542196	8243a264-91a1-4874-aa0f-d00c02f7f711	8	+	1	433,	0,	EMB
chrI	541774	542194	73b680a5-5acd-42a2-9603-6f72e9501d2d	8	+	1	420,	0,	EMB
chrI	541828	542198	c51718d9-39c2-47a1-bf0c-aa201929401e	6	+	1	370,	0,	YA
chrI	541829	542196	ed0486ad-3386-4b57-b0cb-282838dd5ac8	10	+	1	367,	0,	EMB
chrI	541845	542205	54a981aa-512e-4921-9367-c24d88703c37	9	+	1	360,	0,	L1
chrI	541865	542110	6c2c8b50-1c1c-42b5-98e0-74f8e3e33ccb	6	+	1	245,	0,	EMB
chrI	541889	542204	3c48195c-2fd0-4504-91aa-511385b739ff	7	+	1	315,	0,	L1
chrI	541945	542204	6b688b66-10a6-49a7-baa2-365c0f6f747a	8	+	1	259,	0,	EMB
chrI	541999	542198	10d2b5a0-3ac6-49c8-a8d1-7ed11cdd29b7	8	+	1	199,	0,	L1
chrI	555815	556612	5cb5db24-7484-4bfe-87e5-ea64f59b0f5c	11	+	1	797,	0,	L1
chrI	555851	556669	c38a07af-30f9-43c3-9e08-57bc9bcdbfeb	11	+	1	818,	0,	L1
chrI	555855	556660	404e9307-717e-49ac-90a9-7a4df302ae01	14	+	1	805,	0,	L1
chrI	555886	556676	3b5f2506-da6d-4faa-98d6-098d115baa7c	6	+	1	790,	0,	EMB
chrI	555918	556636	a7e8a46b-6a18-4473-b6f0-a700df7645e0	6	+	1	718,	0,	EMB
chrI	555960	556679	20efdf06-e02e-4b28-a9f5-bc5bb46f93da	7	+	1	719,	0,	EMB
chrI	555999	556678	a07683b6-cebe-400c-b248-b56afd4ee5ab	12	+	1	679,	0,	EMB
chrI	556001	556673	040c045c-5836-481b-b209-ec35b92fc792	12	+	1	672,	0,	YA
chrI	556021	556508	1b079623-a99d-41fc-99d6-1dd5f28cc163	6	+	1	487,	0,	EMB
chrI	556041	556676	e532b547-1704-40ec-9d88-d3d373013c23	10	+	1	635,	0,	YA
chrI	556052	556646	3d5e6000-05f2-40c4-8ce6-c93a3209e4c3	8	+	1	594,	0,	EMB
chrI	556077	556670	dcda57b3-484f-46e5-869d-e011aaf1d57e	4	+	1	593,	0,	YA
chrI	556090	556676	ef0d9558-7aa0-496b-bf0d-10646d1e9547	11	+	1	586,	0,	L1
chrI	556095	556564	1368e2ae-5b20-4368-8609-428ff554960c	9	+	1	469,	0,	YA
chrI	556107	556306	f61201ab-395d-4eb0-9a9a-43c8a4b558a1	6	+	1	199,	0,	EMB
chrI	556141	556677	e13c75c8-55eb-43d8-baae-396b09fdd570	14	+	1	536,	0,	L1
chrI	556151	556676	788d09ed-0ef0-407a-b33b-8b3d89fde8db	10	+	1	525,	0,	YA
chrI	556159	556667	1c028166-19e5-4d04-a227-46b794769299	10	+	1	508,	0,	YA
chrI	556186	556657	12c28e84-3da2-4e09-8e07-c92556848f9a	10	+	1	471,	0,	none
chrI	556187	556677	3fdc724e-3fe3-426f-8c9e-5e717f5cd771	10	+	1	490,	0,	YA
chrI	556198	556676	f6a357cb-649e-4677-82a6-2a07bf3de614	6	+	1	478,	0,	YA
chrI	556200	556681	7f202dcb-9686-41ea-9467-7024d7093c53	6	+	1	481,	0,	EMB
chrI	556231	556614	ef9271c1-beab-40a0-b066-5f6b13963e74	10	+	1	383,	0,	EMB
chrI	556249	556674	04cf93f6-a380-4046-a21f-96205053e27f	8	+	1	425,	0,	EMB
chrI	556331	556668	eefea0a7-ab1f-43cb-af9b-a65b7b8a665c	8	+	1	337,	0,	YA
chrI	556331	556676	a20653be-8bd4-44f0-9e37-9982729fe280	8	+	1	345,	0,	YA
chrI	556341	556678	43373db2-6e55-4f09-aa12-8a04f22c9db7	8	+	1	337,	0,	EMB
chrI	556342	556615	41d67bd9-e850-4a4d-b73b-01f1ebf8f17e	6	+	1	273,	0,	EMB
chrI	556345	556681	4c5f8052-733d-4bdf-844a-9c48a25c7c7f	6	+	1	336,	0,	EMB
chrI	556359	556678	9438f4ba-096c-404a-88b3-e5a3ba1fdb6e	8	+	1	319,	0,	YA
chrI	585869	586120	8e0a24ee-73a5-459c-8146-da0969a53b90	6	-	1	251,	0,	EMB
chrI	587152	587278	3a46dac1-1d3b-4ae3-8d52-776c45dcd079	8	-	1	126,	0,	YA
chrI	631031	636352	129d1b9a-51ff-4c3a-9044-89b391d0f76f	6	-	3	254,907,119,	0,2859,5202,	EMB
chrI	631051	636343	d7c95f94-72d4-4c6e-9b85-c7d59f717110	8	-	3	234,907,110,	0,2839,5182,	YA
chrI	631080	636337	770931ca-b7b6-4ecf-9191-192f8b3ce816	6	-	3	205,907,104,	0,2810,5153,	EMB
chrI	634055	636339	861e85f6-4121-441e-85aa-24d6c948eb60	8	-	2	742,106,	0,2178,	EMB
chrI	634061	636351	8910a266-0518-443f-8c87-4be6e5b7e9eb	6	-	2	736,118,	0,2172,	EMB
chrI	634095	636346	272703df-437e-4a38-96c0-6a1d38af013d	10	-	2	702,113,	0,2138,	EMB
chrI	634172	636350	e084e37b-54c3-4d17-b0da-22075da4e02b	8	-	2	625,117,	0,2061,	L1
chrI	653686	653892	30c0236b-6793-4a1a-b37e-7da2195d05d2	10	+	1	206,	0,	L1
chrI	653771	653987	29004472-f58f-4ec4-9116-c256ab15f960	6	+	1	216,	0,	EMB
chrI	658808	659623	fe1fde1f-1cb4-4154-a397-2cc90dde14c7	6	+	1	815,	0,	EMB
chrI	658968	659586	849742a8-0435-442d-9774-11bc64fd3b0a	10	+	1	618,	0,	L1
chrI	659059	659585	cf79c5de-3d5c-4382-8e9c-19855fc8c78b	8	+	1	526,	0,	EMB
chrI	659082	659551	82907ac1-1046-4411-8ac1-106871835301	8	+	1	469,	0,	EMB
chrI	659100	659457	bae64717-9939-41db-b473-1c875aaf0599	12	+	1	357,	0,	L1
chrI	659146	659571	b1673dfa-6177-44d2-92b8-c93a7df2f4bf	6	+	1	425,	0,	EMB
chrI	659156	659504	3e4b84ab-1828-44ae-a349-e62d263fc402	8	+	1	348,	0,	EMB
chrI	659311	659605	f77e2012-0fa4-463f-8fbe-63286388f7ca	8	+	1	294,	0,	YA
chrI	659390	659575	c3852335-3f45-4b37-8043-602670836640	10	+	1	185,	0,	YA
chrI	725154	725385	dd220df2-b57f-40a0-aa14-a3e26be2f9bb	7	+	2	71,100,	0,131,	YA
chrI	730419	730527	b627e452-5316-4b6c-a245-199c38c49523	6	+	1	108,	0,	YA
chrI	770459	770733	7731d197-a5cb-49a8-9b59-270760b68e0f	8	+	1	274,	0,	L1
chrI	831774	833128	0b21b036-92d2-4016-bc66-2c466c0c335c	8	+	2	1046,239,	0,1115,	EMB
chrI	832097	833128	ac01c3e1-7c39-4913-85d3-7029cfc966da	6	+	2	723,239,	0,792,	EMB
chrI	832403	832575	347ae7e3-68a3-47ac-ba13-9e3d6ffb39e3	7	+	1	172,	0,	EMB
chrI	832686	833255	6d67dc86-66f3-4e71-a266-e926a00e066a	8	+	3	134,244,73,	0,203,496,	L1
chrI	833113	835292	b2a926b1-d92b-48ef-a017-bf46e7e08c52	8	+	4	20,90,194,511,	0,69,1426,1668,	YA
chrI	833182	835295	056f70ec-7524-4fa8-82a4-88663e5b7756	6	+	2	7,263,	0,1850,	EMB
chrI	833189	835292	d9c7bdd0-3415-4a12-849b-0049c044a486	6	+	3	83,203,499,	0,1350,1604,	EMB
chrI	833213	835219	b18feb86-c991-4dc8-9ca4-21a9a08a387b	8	+	2	20,338,	0,1668,	EMB
chrI	833467	835286	467f1396-54a6-4f16-98b4-57acb7d8aaf1	10	+	1	1819,	0,	EMB
chrI	834564	835285	5392d4c9-181d-4d29-ad2f-9b9f1e408b08	6	+	2	175,499,	0,222,	EMB
chrI	834795	835292	1b96708b-4193-4a1d-969c-9b85a52cb53c	6	+	1	497,	0,	EMB
chrI	834811	835292	1bdfda0a-917f-4585-a55f-b97e6b27337f	7	+	1	481,	0,	EMB
chrI	834811	835273	8242ea98-d1c8-4cf5-8d74-0a571a7a5d27	8	+	1	462,	0,	EMB
chrI	834820	835274	5238054d-393f-4734-8425-a0969a91ae2e	8	+	1	454,	0,	EMB
chrI	834820	835291	19992d5f-1197-4009-89e6-979a6ffc8b54	10	+	1	471,	0,	EMB
chrI	834825	835220	0c59a8c3-de97-4132-9b1b-7579deb12f0b	6	+	1	395,	0,	EMB
chrI	834838	835292	f600c7c6-f3ff-4cca-b2a7-056e606666dc	6	+	1	454,	0,	EMB
chrI	834914	835193	9a5b0f68-6c24-47b3-99c5-5b01e8987e3f	8	+	1	279,	0,	EMB
chrI	834960	835280	229d06ea-f8df-4c72-a77a-7bddf99ae4aa	8	+	1	320,	0,	YA
chrI	834996	835286	36fa89b4-a492-4dfb-881d-4122427e06ca	6	+	1	290,	0,	EMB
chrI	835007	835262	f2051698-41d7-42ea-aa61-7a224c1826ea	6	+	1	255,	0,	EMB
chrI	835057	835296	2089a6b8-24b2-4acd-a21a-0d978fb3ec09	10	+	1	239,	0,	EMB
chrI	835058	835293	c9efce94-f816-4fb1-ba9b-345e9cf10fd9	7	+	1	235,	0,	L1
chrI	835061	835238	f1bad5ae-8992-4db8-81e9-7a7e4a631ade	8	+	1	177,	0,	EMB
chrI	862742	863013	6d4f81fe-1e3f-463d-9f64-5a2dfd8dd087	8	+	1	271,	0,	EMB
chrI	871697	872227	7602737e-124a-49ed-8eec-e7e877662c87	6	+	1	530,	0,	YA
chrI	871840	872827	b3d69a1b-6e9f-484c-834c-8bb21cea8ec6	8	+	1	987,	0,	EMB
chrI	871842	872826	1bd3f86a-367d-41e9-aa05-403eba00ad52	8	+	1	984,	0,	YA
chrI	871843	872816	c93c45e5-8231-4f38-82ff-1cdc368e78b0	8	+	1	973,	0,	YA
chrI	871861	872819	267183ae-8752-49cf-8868-790202db119a	6	+	1	958,	0,	YA
chrI	871877	872824	a021a184-2132-4514-8691-a47490417908	8	+	1	947,	0,	L1
chrI	871929	872825	ca01895c-dc50-4e1b-9c8f-b7b2bf2e836d	4	+	1	896,	0,	EMB
chrI	871931	872824	6e3cef4f-2121-4368-be55-d46229d6ae67	6	+	1	893,	0,	EMB
chrI	871945	872819	8871adac-29a3-4a6e-9966-a1c07c84b38c	8	+	1	874,	0,	EMB
chrI	872081	872822	61e54d35-e815-438c-b517-806e34947822	6	+	1	741,	0,	EMB
chrI	872091	872823	bf9f888e-a16b-4543-9560-3eb225b75d67	6	+	1	732,	0,	YA
chrI	872099	872825	83a37765-2668-49ba-95c0-c1ee33720dad	6	+	1	726,	0,	EMB
chrI	872137	872480	a0082d7d-0409-4537-a294-98ba73cce32f	13	+	1	343,	0,	L1
chrI	872153	872720	d35f2895-aef2-455a-9ce2-a868bbdedbcd	7	+	1	567,	0,	L1
chrI	872158	872827	640ce715-09ad-4e46-bb27-ff5b1f63de7d	9	+	1	669,	0,	YA
chrI	872159	872821	856f054c-314c-4368-819a-16616c767eef	9	+	1	662,	0,	none
chrI	872172	872631	8a767241-67ca-4569-bc7c-fc8c32c4894f	8	+	2	122,269,	0,190,	EMB
chrI	872173	872672	35b76779-6716-4fce-b5dc-c03e96ba2ffd	10	+	1	499,	0,	EMB
chrI	872199	873052	89556885-5f0f-48c8-9dfe-cf4fb60a02d7	10	+	2	419,16,	0,837,	EMB
chrI	872200	872826	dd1e502e-44be-4747-8595-792d14b1a8aa	8	+	1	626,	0,	EMB
chrI	872221	872821	1ce4d02d-8916-4bb9-9f9a-c18b1e6c6eaa	8	+	1	600,	0,	YA
chrI	872286	872825	06464926-62ad-420d-a28b-c113572869b3	10	+	1	539,	0,	L1
chrI	872293	872825	a12c3531-9375-4ee1-aacc-9e002005a31c	9	+	1	532,	0,	EMB
chrI	872313	872826	a9c07637-6087-4388-8bb7-445df84ef54d	8	+	1	513,	0,	EMB
chrI	872313	872826	63dab2a2-13af-4df9-a7bb-a376236d43a6	9	+	1	513,	0,	YA
chrI	872359	872772	4716efeb-80e0-479c-b413-eec22d60e99a	11	+	1	413,	0,	YA
chrI	872361	872825	428b321a-5aa9-4a67-9d0b-aeccd0bbfd1d	14	+	1	464,	0,	L1
chrI	872361	872818	29e8c19d-6cbd-4f83-a4ed-d45d200e7890	14	+	1	457,	0,	L1
chrI	872376	872814	dc85f1a8-df92-41f0-9dc0-184ccbe0af23	8	+	1	438,	0,	YA
chrI	872384	872826	a184d5c8-a163-4479-82a5-04aaa146dd7f	8	+	1	442,	0,	YA
chrI	872389	872826	a99a9dc9-8968-4f8a-a51f-8e2d93b9e6ff	11	+	1	437,	0,	YA
chrI	872413	872817	71d669ed-e749-4d73-87a7-c91d22b6aefa	12	+	1	404,	0,	EMB
chrI	872420	872825	86c66286-81c4-449c-bded-5c925de6b163	10	+	1	405,	0,	EMB
chrI	872421	872825	5e869a77-9bb3-487c-a44b-b00fd9eeb08f	10	+	1	404,	0,	EMB
chrI	872423	872825	7716a1f8-8b8c-4f2e-9842-1177ab57b198	10	+	1	402,	0,	EMB
chrI	872442	872826	5da24ad9-67f3-4fb2-aeac-6858eefc4a03	7	+	1	384,	0,	YA
chrI	872462	872826	44cbe648-5373-4fe5-846a-60361483d89d	10	+	1	364,	0,	YA
chrI	872464	872826	4130f29f-5ebb-4f30-ba1e-afe2ec6fb04e	9	+	1	362,	0,	L1
chrI	872502	872827	3fe10d03-74fe-492c-9949-6cff615b4a36	6	+	1	325,	0,	EMB
chrI	872549	872827	d3acf6ec-394e-4511-92be-7b6d40f929d9	8	+	1	278,	0,	EMB
chrI	872658	872827	949d5ec3-ddfc-4b36-bd56-e8d3ccb59c8d	10	+	1	169,	0,	EMB
chrI	872748	873443	b8ebe169-8a33-473f-af37-0e4d5a05d455	6	-	1	695,	0,	YA
chrI	872753	873268	9a9aee19-7627-462c-a8a0-4a88c960c5ab	11	-	1	515,	0,	L1
chrI	872753	873314	7fdb56eb-5772-43b7-a3f1-4aa6097e497a	8	-	1	561,	0,	L1
chrI	872755	873359	703e0a2a-cee2-4ac6-a3df-649de5206ab5	11	-	1	604,	0,	none
chrI	872755	873566	7fa7a321-b58d-496f-a4cd-66e98a8956cd	7	-	1	811,	0,	L1
chrI	872755	873575	adf5e9cf-1ffc-4952-b5dc-7b6ce39b4100	8	-	1	820,	0,	YA
chrI	872755	873149	239ed752-e365-4cd2-bf7d-a5f99e120849	8	-	1	394,	0,	YA
chrI	872759	873439	be3be848-af41-4dab-940b-cd77186909c5	6	-	1	680,	0,	YA
chrI	872761	873609	492a94ff-4c0c-41c6-924b-266f48a40f81	7	-	1	848,	0,	L1
chrI	872762	873294	1088c774-9f01-487d-bdad-14f72d91fab5	9	-	1	532,	0,	YA
chrI	872764	873189	5d196ec4-113d-4c45-8104-d539505293e7	6	-	1	425,	0,	EMB
chrI	872764	873193	fc9411cd-f510-43b9-b195-58489cf7d696	9	-	1	429,	0,	L1
chrI	872764	873330	65dba18c-cdad-4d95-9011-27f870cf1942	6	-	1	566,	0,	YA
chrI	872766	873355	f4bbdb93-ecad-4e42-8ea0-dde3b73cff67	6	-	1	589,	0,	YA
chrI	872766	873333	98501855-6827-466c-9519-aa340fdcedbc	8	-	1	567,	0,	YA
chrI	872857	873522	bcc19e6d-5878-4412-84f9-e087d88b168f	8	-	1	665,	0,	L1
chrI	894681	894859	727c3de9-c4c9-42cf-92cf-1f4def1b6f4d	8	-	1	178,	0,	EMB
chrI	906474	907378	11f9df8b-acd6-46ab-95a1-3ca2ac28c53c	8	+	1	904,	0,	YA
chrI	906504	907369	0ff54b45-8497-4766-9a33-d204f025bbff	10	+	1	865,	0,	YA
chrI	906511	907368	f3bc087a-d33c-44f4-9fa4-9ce3e276bb37	8	+	1	857,	0,	YA
chrI	906559	907370	40ddae53-45c8-456f-9b9e-058398fbd187	8	+	1	811,	0,	YA
chrI	906586	907374	b943b62e-2ae5-4873-8ace-708f54b2b384	8	+	1	788,	0,	EMB
chrI	906616	907369	adafb3f5-5d1c-4c49-a189-da1fe386c445	8	+	1	753,	0,	YA
chrI	906627	907369	7d600587-f8ba-4e8b-a29a-90aea9f780d9	6	+	1	742,	0,	YA
chrI	906637	907374	79f37ded-538c-4e00-8f51-b92a2a129c4e	9	+	1	737,	0,	L1
chrI	906643	907369	6ced96c1-10d6-4576-a047-c8ec2e8cf968	9	+	2	333,172,	0,554,	EMB
chrI	906679	907390	1679b6fb-f3a7-4c05-be5e-becc364bd593	6	+	1	711,	0,	YA
chrI	906737	907366	d719c3a3-6a98-4fd2-b109-b64aae2336d0	8	+	1	629,	0,	YA
chrI	906769	907368	1517e8e9-f583-4861-8794-6d06fd95ef28	6	+	1	599,	0,	L1
chrI	906769	907334	27831f81-0984-41ad-b703-7209182bc353	10	+	1	565,	0,	YA
chrI	906770	907369	30b168bb-81c4-46cc-badc-eeb56bd4992e	10	+	1	599,	0,	YA
chrI	906772	907356	4d8f38af-cede-4d63-8042-c8f7ca42fd75	10	+	1	584,	0,	L1
chrI	906776	907375	884980ce-d530-43ab-9e7b-f6468e68d273	10	+	1	599,	0,	EMB
chrI	906794	907369	f14e7d83-09d6-42f9-86c0-f9732f2634f5	10	+	1	575,	0,	YA
chrI	906799	907369	4a93c09c-495e-4218-ae1a-480d57c1b55a	8	+	1	570,	0,	EMB
chrI	906804	907369	82fadfad-0a53-4c2c-b290-dbc4d0300431	8	+	1	565,	0,	YA
chrI	906814	907369	95b8d2de-bec7-4964-9f7f-74ce1ecf5869	6	+	1	555,	0,	YA
chrI	906835	907378	85c7c7b1-9fd9-4616-9e92-c372e15397b7	8	+	1	543,	0,	EMB
chrI	906842	907335	1b7bc4cb-2317-47dd-974d-b0681c3cb9ad	8	+	1	493,	0,	YA
chrI	906871	907376	16079d78-bfcb-463c-8c1e-c49a257addb1	8	+	1	505,	0,	EMB
chrI	906884	907365	44d15a17-53f3-4685-95ad-fac10f57368c	8	+	1	481,	0,	EMB
chrI	906887	907369	9b4cfc9f-7391-4af4-a10b-ba26a84db8e6	6	+	1	482,	0,	YA
chrI	906888	907369	aaa38ee5-b1cd-49bd-bc72-4e917d40a7a3	6	+	1	481,	0,	EMB
chrI	906893	907356	11203d47-6908-4dc8-a11e-10b119e2106c	8	+	1	463,	0,	EMB
chrI	906893	907375	61eb0988-6497-44bc-bf0e-ec2065b5a3fd	8	+	1	482,	0,	L1
chrI	906903	907369	f55509fe-31fb-4799-9182-a0ddc5a26600	8	+	1	466,	0,	YA
chrI	906910	907377	d4291183-139d-463f-a543-7f60d12624b9	10	+	1	467,	0,	EMB
chrI	906926	907369	8ad7594a-b336-49c9-a0ce-d76b4fb63e1c	10	+	1	443,	0,	YA
chrI	906935	907356	51577697-e053-4d3c-b838-45f91996b091	10	+	1	421,	0,	YA
chrI	906947	907279	c77e0bf0-4f50-4860-aec9-785ac784ad65	8	+	1	332,	0,	EMB
chrI	906952	907442	494eef4d-e3a8-4eb3-9e66-14e5d7f42431	6	+	1	490,	0,	YA
chrI	906962	907441	11bfd2de-5de4-41ef-a3eb-422040f330bc	6	+	1	479,	0,	EMB
chrI	906984	907369	d8d6dbde-8cd1-4fa0-838f-dfb9237070cd	8	+	1	385,	0,	YA
chrI	907013	907356	2c831f57-9733-4e0b-9eb6-39fee59e6e34	6	+	1	343,	0,	YA
chrI	907013	907374	20521a3a-46c2-4746-9037-e3f062930b6c	6	+	1	361,	0,	YA
chrI	907015	907359	9eb00163-d7e6-4876-85f0-e0e10c870ba3	8	+	1	344,	0,	YA
chrI	907016	907367	ca268a9b-0fcf-4fa8-b863-4b4d9e17460a	10	+	1	351,	0,	YA
chrI	907043	907376	3399bd44-e571-442f-8ccd-27ecf8ee345f	8	+	1	333,	0,	YA
chrI	907056	907376	47b1710e-a8e8-4da0-bb8c-f00d44d8b457	12	+	1	320,	0,	L1
chrI	907134	907369	b8a5cb5b-b4b3-4c39-9ed0-3906041fcac1	6	+	1	235,	0,	YA
chrI	907174	907369	c0724a8f-0433-4fdc-97d6-bf78ad36c65e	9	+	1	195,	0,	YA
chrI	947444	947710	8c23448c-ba16-4fef-aa1d-2788d4a8e1d2	9	+	1	266,	0,	L1
chrI	948661	948808	ed112fdd-fc6c-4b15-a16c-0ed97b93b667	8	-	1	147,	0,	YA
chrI	961200	961352	2b8142d7-2f6c-47c0-b038-b05e8816dcc4	8	-	1	152,	0,	EMB
chrI	977079	977761	72aae9ae-24a1-473c-95e8-f657fc1c87b2	8	-	1	682,	0,	none
chrI	1005129	1005640	353bbc2a-1886-4499-900e-2b4a33e5c580	9	+	1	511,	0,	L1
chrI	1005229	1005639	98ef76f8-ceb7-4767-94bd-dedd65e34b5e	8	+	1	410,	0,	L1
chrI	1010787	1011444	edcb89c6-9ef6-4673-ba78-8903093fa511	8	+	1	657,	0,	YA
chrI	1019824	1020036	1126e820-dab0-4e4d-99b7-88d89b6cefe1	10	-	1	212,	0,	YA
chrI	1029486	1029850	d09bd8d3-3992-4050-8137-b54d8a500ea3	6	-	2	117,189,	0,175,	EMB
chrI	1048349	1049485	cd3aa37a-0708-445f-96c6-ad271d174295	6	+	1	1136,	0,	EMB
chrI	1048353	1049485	8c993110-d02c-4121-8030-ef559be8ad78	9	+	1	1132,	0,	EMB
chrI	1048355	1049264	3fe41e56-1516-4e50-a5a5-d2373c54dc77	10	+	1	909,	0,	EMB
chrI	1048385	1049453	4bcbc22c-2767-4fde-8426-ce0668c4ead6	8	+	1	1068,	0,	YA
chrI	1048435	1049600	197b239c-f6af-4438-a814-0efc35871222	6	+	1	1165,	0,	none
chrI	1048457	1049279	a4118c50-390b-4c39-a8e5-7b0bea63c227	6	+	1	822,	0,	EMB
chrI	1048484	1049466	d6721c12-8a84-4545-bd0c-c8852eb2742d	10	+	1	982,	0,	YA
chrI	1048553	1049448	e2ffd995-cebb-4bb7-9307-512d7bce865e	8	+	1	895,	0,	EMB
chrI	1048622	1049487	bbdcb444-35ec-4b14-a801-df1cde34b850	8	+	1	865,	0,	YA
chrI	1048627	1049290	4a5d9b59-0448-43ae-baf4-c10a6f22c5ea	8	+	1	663,	0,	EMB
chrI	1048690	1049599	1e6386f9-f163-4c6f-9477-854793d21d51	6	+	1	909,	0,	YA
chrI	1048697	1049475	6d26fa02-c499-48c4-826f-e7df8632dd9c	10	+	1	778,	0,	EMB
chrI	1048701	1049441	52a32615-8b21-4811-8a10-0ab3a3759ea8	11	+	1	740,	0,	L1
chrI	1048710	1049442	434f965f-6306-492b-9697-cc171e515c1d	8	+	1	732,	0,	YA
chrI	1048767	1049477	3a8207c2-1a60-4588-b276-b755d3e97779	10	+	2	515,137,	0,573,	YA
chrI	1048814	1049488	314b245f-deca-466e-bb0c-77cba90961c9	6	+	1	674,	0,	EMB
chrI	1048877	1049576	52eb1466-18fb-4f39-9ff5-ade1c91c31c1	8	+	1	699,	0,	EMB
chrI	1048889	1049470	a99d1152-9de7-421e-9bac-d3571e18dfb8	9	+	1	581,	0,	YA
chrI	1048891	1049481	6424a638-13b3-41c6-89b1-c74679068341	6	+	1	590,	0,	YA
chrI	1048938	1049440	5f931e03-9907-49e5-a0ac-ae73c3f0cdb5	10	+	1	502,	0,	YA
chrI	1048946	1049442	b06a3288-9a71-4673-a0ae-3ff98f416876	11	+	1	496,	0,	L1
chrI	1049003	1049442	dce26a25-3520-4d28-880c-11816dc7cc4d	10	+	1	439,	0,	YA
chrI	1049035	1049442	9992e11c-cbbf-4aa3-b0bd-c68b95fb42fc	8	+	1	407,	0,	EMB
chrI	1049053	1049475	ba3be7c7-f850-4c1b-9819-826166bf98b0	8	+	1	422,	0,	EMB
chrI	1049076	1049447	f786220d-3a1c-4d18-9b7f-b51a75e724be	6	+	1	371,	0,	EMB
chrI	1049076	1049486	246a59d8-10d7-4616-a0db-ad54242ca0fd	8	+	1	410,	0,	YA
chrI	1049094	1049437	90e43415-2c2b-4eb1-851c-5898e27d7197	10	+	1	343,	0,	EMB
chrI	1049104	1049441	820f5f37-4f07-4dc8-ae5c-c33bab9f17a5	10	+	1	337,	0,	EMB
chrI	1049160	1049464	b857b87a-f60a-4ed1-af60-f79ddde33b24	8	+	1	304,	0,	EMB
chrI	1049165	1049481	303724a2-8b99-40d5-86b4-282b1dee65a5	6	+	1	316,	0,	YA
chrI	1049169	1049487	7405ae63-b4d6-4aab-b295-3ba13fe30055	10	+	1	318,	0,	EMB
chrI	1049195	1049448	e6b4c157-56d9-4d04-802a-acfe9264c5a5	8	+	1	253,	0,	EMB
chrI	1049402	1049591	150ff6c3-c410-4103-88b8-bb09f2bb3a64	8	+	1	189,	0,	EMB
chrI	1050670	1050963	e1bee740-2541-4f8d-a5a1-aae5ba7a1e30	8	-	1	293,	0,	L1
chrI	1053883	1054270	e6c955db-6c5e-40c6-90d9-9d79f71721cb	11	-	1	387,	0,	EMB
chrI	1053892	1054427	19f08c30-e19f-472e-a02d-81cccadc4d1d	8	-	1	535,	0,	EMB
chrI	1053892	1054384	bbf9bc6d-f208-40a8-abdf-8aa8e3d17681	8	-	1	492,	0,	L1
chrI	1053892	1054443	457afdcd-c0c1-4322-9caa-27ca5ba0ea9f	10	-	1	551,	0,	YA
chrI	1053892	1054202	b102f07e-e934-47a1-94a8-d0f73fe81f4a	8	-	1	310,	0,	YA
chrI	1053892	1054262	76129316-c823-4a32-8e73-2da2280d48e8	8	-	1	370,	0,	YA
chrI	1053892	1054470	874ded53-f4c5-413e-b693-a4c8b7511173	7	-	1	578,	0,	YA
chrI	1053893	1054249	36668bdf-df07-488e-a2bc-36201ce19b97	7	-	1	356,	0,	EMB
chrI	1053894	1054113	3038fa7b-f813-44a2-9ef6-5d280191fb83	11	-	1	219,	0,	L1
chrI	1053894	1054348	6d22da4a-3ec0-4047-9167-9192a6b9a0e3	12	-	1	454,	0,	L1
chrI	1053894	1054267	7d4d4738-0724-4c03-b1ea-bccac6dd0548	6	-	1	373,	0,	YA
chrI	1053894	1054407	b93dd61e-c757-4f23-b8a2-36dcb8874e77	8	-	1	513,	0,	YA
chrI	1053898	1054450	521f92a1-038e-4435-b077-97f67dc6fd92	12	-	1	552,	0,	EMB
chrI	1053900	1054309	14a0fd08-172f-43c0-9c33-8e4e97402920	14	-	1	409,	0,	L1
chrI	1053900	1054358	79d9e5be-8f5f-445f-a9b9-ef81e9a71965	8	-	1	458,	0,	L1
chrI	1053904	1054430	9621c20c-8c57-4528-b134-bfd9af292039	8	-	1	526,	0,	L1
chrI	1053905	1054391	3d3d7320-3ec3-47db-aecf-b352ca213e76	6	-	1	486,	0,	EMB
chrI	1053905	1054250	042ea4cc-f8ef-4aab-8e39-979aa104a291	6	-	1	345,	0,	YA
chrI	1053906	1054201	bef54b54-50b9-4aca-a330-92cc81967631	7	-	1	295,	0,	YA
chrI	1053922	1054200	1ef65938-d9e6-4201-8180-82141fa4a6e1	10	-	1	278,	0,	YA
chrI	1053926	1054393	1966e454-6bf9-4324-b03a-7b53ae716391	8	-	1	467,	0,	YA
chrI	1053927	1054212	a1395fae-9dfe-453e-aa75-5d8bdf5e9821	10	-	1	285,	0,	EMB
chrI	1054012	1054309	328fc598-1796-43ad-8a7a-b49daeffad78	9	-	1	297,	0,	EMB
chrI	1075016	1076257	49c24ac6-c2bb-408f-ac75-9760fb64db17	7	+	1	1241,	0,	EMB
chrI	1075119	1076257	aee17bfc-467b-4a5a-ae36-e855a2efba5c	10	+	1	1138,	0,	EMB
chrI	1075181	1076391	42a90137-6e7d-4bb4-807e-561052c66a29	8	+	1	1210,	0,	EMB
chrI	1075182	1076258	4c766263-7c3c-433f-8b44-f1bbb8edfdee	11	+	1	1076,	0,	EMB
chrI	1075301	1076389	539c1e9b-5959-4072-88a5-5642a6a8f520	4	+	1	1088,	0,	EMB
chrI	1075316	1076387	81d3dea4-fcd7-46d4-aaa1-0845777941b4	9	+	1	1071,	0,	EMB
chrI	1075354	1076209	94352ee5-5a89-45ab-99a5-04a893e4d1af	10	+	1	855,	0,	L1
chrI	1075425	1076391	6349047c-ef21-435c-af30-c8a860f47738	6	+	1	966,	0,	EMB
chrI	1089791	1090087	5cf00757-ec0d-4379-87a9-1cb1c5602044	6	-	1	296,	0,	EMB
chrI	1162634	1162850	607df7f0-30f2-430b-b80f-43da5efbaea9	8	+	1	216,	0,	L1
chrI	1162768	1162928	bab31407-22f4-412e-a4e5-e416777f72af	8	+	1	160,	0,	EMB
chrI	1166241	1166585	7655ca03-1d4e-46b9-b16d-0a8752dcbd20	10	-	2	84,194,	0,150,	YA
chrI	1167653	1167949	c8a2d120-9314-464d-afb2-851af769e278	8	-	1	296,	0,	YA
chrI	1173469	1173695	522f7ece-bf66-4ada-8f2b-9f732a1ee661	10	-	1	226,	0,	EMB
chrI	1177978	1178506	a1aa8b28-b8a8-45e8-9868-874fe626a693	6	+	1	528,	0,	L1
chrI	1178262	1178613	82dba8b9-2cfc-4124-a93c-9ce826b93d31	7	+	1	351,	0,	EMB
chrI	1178357	1178769	daac5c20-9c3a-470c-b392-7aa713a5885a	6	+	1	412,	0,	EMB
chrI	1210859	1211376	61da6f8c-00c9-45ae-8019-dd95ced3acb6	6	+	1	517,	0,	YA
chrI	1210884	1211378	89ad22de-2b0e-4aae-93bc-76485be54d97	6	+	1	494,	0,	YA
chrI	1210897	1211378	0f3de072-8c65-4066-9371-12745b1766bb	6	+	1	481,	0,	EMB
chrI	1210923	1211376	50351969-9a29-4bf5-9d87-bb7c3e132ef5	6	+	1	453,	0,	EMB
chrI	1210927	1211195	2d2108dd-9175-4884-87bd-d2160bf92049	8	+	1	268,	0,	EMB
chrI	1210938	1211377	9d9ddf02-d13d-4d9f-aaa0-baacb9ccca8d	10	+	1	439,	0,	L1
chrI	1210940	1211355	987ddc50-fe47-43dd-bdbd-3e4742afc176	10	+	1	415,	0,	YA
chrI	1210941	1211379	ce8ba4d3-f7d9-470e-8e3f-f9c206bc1f08	6	+	1	438,	0,	L1
chrI	1210954	1211185	d162c01b-218e-4d08-8cb6-c365a63a61b8	18	+	1	231,	0,	L1
chrI	1210964	1211243	9f01c483-9064-448e-8966-6bb24af252d6	7	+	1	279,	0,	EMB
chrI	1210965	1211331	a53cc8e3-6815-4779-ab6b-a96c48fc20c0	8	+	1	366,	0,	EMB
chrI	1210974	1211335	d3a13da1-7352-493d-a86b-9d838264efdc	6	+	1	361,	0,	YA
chrI	1210975	1211377	9abf3cab-ed0b-49c9-8b8c-f1ba43a77007	8	+	1	402,	0,	L1
chrI	1211000	1211430	b47b6279-a8e6-4013-b36d-3f464c78f7fd	7	+	1	430,	0,	YA
chrI	1211034	1211347	ca763cde-bdbd-4f1c-b5b7-caa0dbae4069	10	+	1	313,	0,	YA
chrI	1211055	1211405	f09eb0e5-39ba-4d96-ae2b-a1261d8bf832	8	+	1	350,	0,	EMB
chrI	1211114	1211379	ed58f23c-169e-4dd0-af9c-4860c68752d2	6	+	1	265,	0,	EMB
chrI	1211120	1211378	713cbf13-4d41-40ae-bd75-2d4d4dd719c7	12	+	1	258,	0,	L1
chrI	1211136	1211431	4cafd505-7e6f-4d75-b10d-d5c2a204c8be	8	+	1	295,	0,	EMB
chrI	1211139	1211425	4619d9cd-237c-457e-b16c-71b9c1d617e8	10	+	1	286,	0,	YA
chrI	1211170	1211425	d8b9904a-ccc5-4ddd-a1d4-2e9a674c6624	9	+	1	255,	0,	YA
chrI	1211278	1211430	b921cd01-e810-4456-84f1-971604121628	8	+	1	152,	0,	EMB
chrI	1230033	1230279	c04dc218-abe3-4e8d-8f16-b86efea09768	6	-	1	246,	0,	YA
chrI	1236160	1236518	0ee55231-cd64-4a27-af46-965c5c040dee	6	+	1	358,	0,	EMB
chrI	1253041	1254652	dd44a23a-a9af-43d9-a7b8-b439f7464c38	4	+	2	474,276,	0,1335,	EMB
chrI	1253356	1254645	5fb520a1-df4d-4971-99d3-6889e0d05775	6	+	2	159,269,	0,1020,	EMB
chrI	1253438	1254675	0bbef391-2720-4cd3-a457-e8000e165a14	6	+	2	77,299,	0,938,	EMB
chrI	1258194	1259609	0fe76e12-2a92-4dd1-a42a-bd55f7307ca5	6	-	1	1415,	0,	EMB
chrI	1258194	1259512	9e2548c0-190c-4dde-be22-7f9a5c3a032a	8	-	1	1318,	0,	L1
chrI	1258198	1259663	149ee4d4-238c-4ac2-94af-9a3ffc988357	7	-	1	1465,	0,	EMB
chrI	1258198	1259367	64309217-9c02-4530-b5af-bca5526f239f	8	-	1	1169,	0,	EMB
chrI	1258198	1259165	3ef2e90c-94a9-40cc-81cc-129ef8694859	8	-	1	967,	0,	EMB
chrI	1258198	1259225	8ab6954f-4e72-410d-b9a5-b5ff139bf439	6	-	1	1027,	0,	EMB
chrI	1258198	1258520	bdbea72a-21ec-4e6a-911c-a43d09670c0c	8	-	1	322,	0,	EMB
chrI	1258198	1258777	3521f477-7e46-4d7b-aa2f-db38ddeb7328	10	-	1	579,	0,	EMB
chrI	1258198	1259038	1cd8f281-c3ed-4ebe-b79c-1dbb39f713dc	8	-	1	840,	0,	EMB
chrI	1258198	1258643	d4962a9a-b38f-4955-9c82-5b05165ae481	6	-	1	445,	0,	EMB
chrI	1258198	1258812	b9b202f5-66f1-4d1c-9b5b-0fc5a6054232	11	-	1	614,	0,	EMB
chrI	1258198	1259068	7fb2c02d-bc33-4268-beaf-8eccbd95718a	6	-	1	870,	0,	EMB
chrI	1258198	1259267	f28e573c-e33a-4868-b559-1daf715b153b	10	-	1	1069,	0,	EMB
chrI	1258198	1259047	b6709f03-4495-4112-8875-09784ab69078	6	-	1	849,	0,	L1
chrI	1258198	1259065	4d2c7045-9a9b-4714-95fb-da359a6de93a	8	-	1	867,	0,	L1
chrI	1258198	1258927	6a826fb3-0902-485d-b109-08ab184a3078	12	-	1	729,	0,	L1
chrI	1258198	1259673	937784cc-f26e-427e-94df-5d8763dbd4af	11	-	1	1475,	0,	L1
chrI	1258198	1259178	543e252c-35d6-4728-ad19-ae0e411d970a	10	-	1	980,	0,	YA
chrI	1258199	1258792	bb2afae7-0afa-40db-b90a-84519d22360b	6	-	1	593,	0,	EMB
chrI	1258199	1259540	ac740a1e-dbfa-4c70-b0db-9e7a83d06f32	8	-	1	1341,	0,	EMB
chrI	1258199	1258785	5050e98a-9e53-4515-a28c-9ab6f7752653	6	-	1	586,	0,	none
chrI	1258199	1258984	76ede3b3-0620-45c5-9475-97845b3cd6b0	15	-	1	785,	0,	L1
chrI	1258199	1259521	ccaf6c60-273d-4df0-9e13-2f6b2a22a69e	12	-	1	1322,	0,	L1
chrI	1258200	1259178	22fe9540-5e76-4fae-9fbe-c0936377073e	10	-	1	978,	0,	EMB
chrI	1258200	1259177	88f19576-88a1-4308-a0e9-cf772e949f59	10	-	1	977,	0,	EMB
chrI	1258200	1258674	2952ad32-d979-4566-a40e-1676d48c132f	8	-	1	474,	0,	EMB
chrI	1258200	1259512	6d15d041-ce2c-44f7-8dd2-1669d7133463	10	-	1	1312,	0,	EMB
chrI	1258200	1259199	a1d57cc2-938d-4cf7-aa83-72a859d93831	10	-	1	999,	0,	EMB
chrI	1258200	1258948	c4d17162-082d-4daa-bc01-6abf73dc226c	8	-	1	748,	0,	EMB
chrI	1258200	1258578	85bd3316-9b76-44e4-be0b-a5af24a82e80	10	-	1	378,	0,	EMB
chrI	1258200	1259643	6ec3e7d9-3154-48bd-8b11-74adddf99474	8	-	1	1443,	0,	EMB
chrI	1258200	1258825	3a304a6e-f3e9-4786-9ffa-075e5442527b	10	-	1	625,	0,	EMB
chrI	1258200	1259126	2020cb35-8e91-41a9-8711-3591c76787ac	7	-	1	926,	0,	EMB
chrI	1258200	1259582	1a1471d5-f1a4-4f57-8800-3aadfd15f45a	8	-	1	1382,	0,	EMB
chrI	1258200	1259051	d92dd611-2aee-47ab-abe9-2f5768f007db	6	-	1	851,	0,	EMB
chrI	1258200	1259225	23212063-f185-4153-a98b-5cdd5d23ea47	10	-	1	1025,	0,	EMB
chrI	1258200	1259395	9125eb01-c380-4905-8d3c-4484130e7c95	12	-	1	1195,	0,	EMB
chrI	1258200	1259334	5e36cf42-4bc3-4d01-b953-3a54e5278ceb	8	-	1	1134,	0,	L1
chrI	1258200	1259601	bb92fae5-ba3b-42f7-930e-89e590d0481a	7	-	1	1401,	0,	L1
chrI	1258200	1258777	26703cf6-ca53-49a6-97f7-ecec2bed7594	12	-	1	577,	0,	L1
chrI	1258205	1258729	3284ffe5-2b87-4018-8669-96924faa2e9e	6	-	1	524,	0,	EMB
chrI	1258206	1259561	a49c9003-c30b-4e6a-b644-584c466eed69	11	-	1	1355,	0,	L1
chrI	1258207	1259483	ebe21c8b-6748-4578-a6d2-981f7e2d5536	8	-	1	1276,	0,	EMB
chrI	1258207	1258782	6f8abf05-2e90-4c8e-8d2e-6a3371440eac	6	-	1	575,	0,	EMB
chrI	1258207	1259507	4fc732da-afa0-48fb-aa39-c30ba7e97faa	14	-	1	1300,	0,	L1
chrI	1258207	1259652	d4e842a2-8ca3-45db-8f91-4da5028557fd	9	-	1	1445,	0,	L1
chrI	1258213	1258879	ac959761-9eaf-4590-96be-f6ade4abafe8	10	-	1	666,	0,	EMB
chrI	1258214	1259598	956d89c0-307b-4b80-b308-36a9793d7d37	6	-	1	1384,	0,	EMB
chrI	1258237	1258952	bbd62d87-b1ae-4da5-87c3-9af91e002bfb	11	-	1	715,	0,	EMB
chrI	1258237	1258981	4c64a646-d7f6-41ca-945f-da75d1dffc7a	16	-	1	744,	0,	EMB
chrI	1258253	1259645	2ca5c306-0210-41a6-b2c0-78185eb7cf2c	8	-	1	1392,	0,	EMB
chrI	1258257	1258837	ce4e008a-bf3d-4bfb-973e-ffa2ad2fbbba	9	-	1	580,	0,	EMB
chrI	1258260	1258827	5c418ede-90d2-4d4e-9cf8-3f1aec8a4582	9	-	1	567,	0,	EMB
chrI	1258260	1258924	66a012e1-ae78-4515-a3a8-01054446be0e	8	-	1	664,	0,	EMB
chrI	1258260	1259558	c5145419-8d61-4e06-8ea6-028fa88bcfb4	6	-	1	1298,	0,	EMB
chrI	1258260	1259679	faecddc9-76b6-4ad6-9367-59ed597cfedc	8	-	1	1419,	0,	EMB
chrI	1258260	1259196	325112cc-39f9-4065-8f06-8485f19458f3	6	-	1	936,	0,	EMB
chrI	1258261	1258821	19231596-addb-4608-90f9-a87b0c9f81fd	6	-	1	560,	0,	EMB
chrI	1258266	1258827	3478797c-fc8d-42c1-84c5-4c658cac06b5	8	-	1	561,	0,	EMB
chrI	1258266	1259618	c383dbb0-ea99-493c-bbde-fabb40458bd5	9	-	1	1352,	0,	L1
chrI	1258267	1259673	68f9d218-0e69-4b10-b851-bb08eec1a6fd	12	-	1	1406,	0,	L1
chrI	1258268	1259538	405aa797-8f2f-44fa-99f8-d9cc7f94a660	6	-	1	1270,	0,	EMB
chrI	1258268	1258777	d418d4b5-e040-486b-bac8-b20caceb96a3	6	-	1	509,	0,	EMB
chrI	1258275	1259266	06a7bbb0-1e10-4a2e-965e-80319672a79d	6	-	1	991,	0,	EMB
chrI	1258277	1258792	439bcb9b-d8d8-4bcb-9e59-4f7301dea58f	8	-	1	515,	0,	EMB
chrI	1258277	1259180	5f34caca-b593-48d7-94a3-4747d9769bc3	6	-	1	903,	0,	EMB
chrI	1258277	1259486	f313a2b9-fa86-4c7d-8986-f7845db2587a	10	-	1	1209,	0,	EMB
chrI	1258277	1259395	1a78c729-45bd-4b5b-951c-0f386b982956	10	-	1	1118,	0,	L1
chrI	1258278	1259367	ba646ac1-7c06-461f-a4ab-b4a0f85f1537	8	-	1	1089,	0,	EMB
chrI	1258279	1258791	af2e19f4-32c0-47a4-bfe4-777f6b3b2213	6	-	1	512,	0,	EMB
chrI	1258281	1259644	03c4e731-093c-4fc8-8f8a-82bf68fa1366	8	-	1	1363,	0,	EMB
chrI	1258293	1259672	de391596-f7e3-4b02-b272-faa435bc8ffa	6	-	1	1379,	0,	EMB
chrI	1258326	1259493	bca138d1-a14d-490b-8052-85f22b173574	14	-	1	1167,	0,	EMB
chrI	1258334	1259448	5960f89e-249e-4cf2-93ea-ea2887f866ed	8	-	1	1114,	0,	EMB
chrI	1258344	1258688	0fd3b154-e567-40e5-bd12-b5d147a24ccb	6	-	1	344,	0,	EMB
chrI	1258356	1259395	91cbf4d7-e27f-432f-80dc-e78e61ed022f	6	-	1	1039,	0,	EMB
chrI	1258386	1258961	52f18c0d-9e81-43ac-ad2c-cd3520d0c4cf	10	-	1	575,	0,	EMB
chrI	1258398	1258859	33628e59-8c77-4411-94c5-c5467be34e14	8	-	1	461,	0,	EMB
chrI	1258464	1259582	2cfdfca2-aff8-4388-bddb-6a5df63890c5	8	-	1	1118,	0,	EMB
chrI	1258476	1259423	2eec5c2b-deb4-4667-820d-ed9bd3e828f7	10	-	1	947,	0,	L1
chrI	1258478	1259652	0db0d269-875f-4ff7-a736-fabc720ac452	9	-	1	1174,	0,	EMB
chrI	1258490	1259265	0f94b398-4d0e-4240-84ba-ffb4359011e3	12	-	1	775,	0,	L1
chrI	1258497	1259193	e4ad503d-bdec-4726-8e15-461fd4fba577	6	-	1	696,	0,	EMB
chrI	1258681	1259569	9c9f4b36-577c-47c3-a675-0ac305b710c6	6	-	1	888,	0,	EMB
chrI	1258797	1259196	e1ebedcc-acac-413b-bc1a-857e8b3e792c	8	-	1	399,	0,	EMB
chrI	1328015	1328650	af29c3fe-710c-4073-b460-0b6ef5c700c2	6	+	1	635,	0,	EMB
chrI	1328217	1328650	9d6a08a5-dd00-401c-920c-cefecbed0b00	8	+	1	433,	0,	EMB
chrI	1328221	1328601	14ff9d16-d618-4298-9a0a-52c804471e9c	12	+	1	380,	0,	EMB
chrI	1328268	1328649	4c7e09b2-c276-4b79-9f63-764c9463d96f	6	+	1	381,	0,	EMB
chrI	1328295	1328612	e4969285-264b-4cca-a4b9-60eb857c8b4d	9	+	1	317,	0,	EMB
chrI	1328343	1328648	13044971-83ea-4496-9ce5-591004c15ee7	9	+	1	305,	0,	EMB
chrI	1328346	1328633	c0896fec-3598-4796-ba1e-a711d2976dcb	10	+	1	287,	0,	EMB
chrI	1328428	1328617	047400be-445b-451e-b2c7-52451b5ac20a	8	+	1	189,	0,	EMB
chrI	1328462	1328649	837927c3-ecb5-468e-9875-31fcaeb14355	8	+	1	187,	0,	EMB
chrI	1328499	1329503	5d80c02e-1e13-4127-8cc4-fd927188db74	9	+	1	1004,	0,	L1
chrI	1329917	1332546	6064e6f8-c4ad-42df-a137-f3d60bba28ca	6	-	3	103,251,69,	0,331,2560,	YA
chrI	1346377	1347367	0ea661d2-a933-484d-98d2-19f526744faf	8	-	1	990,	0,	L1
chrI	1365301	1375736	6e0f8675-ad8b-46a1-a1d1-d8411d1f807b	7	+	3	319,176,223,	0,5872,10212,	YA
chrI	1365302	1375649	0cc3c4b8-e603-4817-8f00-b2f706243bcb	6	+	3	318,176,136,	0,5871,10211,	EMB
chrI	1365302	1375657	82dab713-ca06-45dc-9a81-76ecd7e7a7ef	8	+	3	318,176,144,	0,5871,10211,	L1
chrI	1365302	1375883	3ed25485-e654-4628-b816-0c4aea69756a	9	+	3	318,176,370,	0,5871,10211,	YA
chrI	1365306	1375814	e85c59c7-a820-47ab-83c3-8362860575ca	6	+	3	314,176,301,	0,5867,10207,	EMB
chrI	1365306	1375712	907bd5c1-527d-41d1-a9b3-96f12dd51219	9	+	3	314,176,199,	0,5867,10207,	L1
chrI	1365306	1375704	5202b039-9928-4152-85df-da20354feed2	6	+	3	314,176,191,	0,5867,10207,	YA
chrI	1365306	1375737	2f395744-ffee-4967-a86f-19d30f8a8139	8	+	3	314,176,224,	0,5867,10207,	YA
chrI	1365306	1375803	91078afe-1c32-44dc-a8d8-245f458ff5be	8	+	3	314,176,290,	0,5867,10207,	YA
chrI	1365306	1375731	0015cb63-cac9-4c10-9db5-a10508f5037e	6	+	3	314,176,218,	0,5867,10207,	YA
chrI	1365306	1375728	02e957d9-d979-4051-8a9f-5d96f32510b2	8	+	2	314,215,	0,10207,	YA
chrI	1365308	1375725	34542813-91f4-4a2b-9592-db141ac09aa1	12	+	3	312,176,212,	0,5865,10205,	L1
chrI	1365309	1375736	f0d0d269-5559-4ddb-bdb7-73fa91f9659c	6	+	3	311,176,223,	0,5864,10204,	EMB
chrI	1365309	1375873	ded56deb-a79e-4779-8fbf-b9430e111465	8	+	3	311,176,360,	0,5864,10204,	L1
chrI	1365309	1375737	01771cff-f873-4c06-96d9-f4e063213c8e	6	+	2	311,224,	0,10204,	YA
chrI	1365309	1375737	f0161967-314c-4ff4-b489-43c2ec396bba	7	+	3	311,176,224,	0,5864,10204,	YA
chrI	1365310	1375880	936083ea-41c4-485d-8119-aa5ab0ff501d	16	+	3	310,176,367,	0,5863,10203,	L1
chrI	1365310	1375647	600cf580-9d91-4e8c-a6d2-43ef8d83ac6f	11	+	3	310,176,134,	0,5863,10203,	YA
chrI	1365310	1375809	3b9a1b2e-d892-461d-8696-642f47aa5729	6	+	3	310,176,296,	0,5863,10203,	YA
chrI	1365314	1375825	8fe7cb78-9212-4ff5-9f82-c7dba8174cc9	8	+	3	306,176,312,	0,5859,10199,	YA
chrI	1365314	1375736	2199cae3-474d-4fbd-a215-043cc73359fc	8	+	3	306,176,223,	0,5859,10199,	YA
chrI	1365315	1375872	7deeb017-097f-4bb5-9a45-12d47fb31080	9	+	3	305,176,359,	0,5858,10198,	L1
chrI	1365315	1375848	e8b764ca-c74e-42aa-8fa8-c983bd54ea6d	12	+	3	305,176,335,	0,5858,10198,	L1
chrI	1365315	1375730	ddee3907-1c1a-4bb3-bb0b-9011bc43268a	8	+	3	305,176,217,	0,5858,10198,	YA
chrI	1365320	1375812	ea7bd894-697c-4eb5-95d9-70319e9b4135	8	+	3	300,176,299,	0,5853,10193,	YA
chrI	1365324	1375812	63846419-352f-455a-a6d2-b5fdf1739f60	8	+	3	296,176,299,	0,5849,10189,	L1
chrI	1365325	1375822	4f4a6308-760e-4616-b40c-e15e8d75ef3c	8	+	2	223,309,	0,10188,	EMB
chrI	1365325	1375813	2c1a0995-ac69-4ead-992a-0c9bf432dcca	8	+	3	295,176,300,	0,5848,10188,	L1
chrI	1365328	1375713	e88a733d-bccd-450a-8988-689c80490ca0	8	+	3	292,169,200,	0,5845,10185,	YA
chrI	1365329	1375852	918e5c39-d513-4136-baed-08b06a1f780d	8	+	3	291,176,339,	0,5844,10184,	YA
chrI	1365333	1375885	7146e134-2510-48ce-afde-2d14ecb08d0e	8	+	3	287,176,372,	0,5840,10180,	L1
chrI	1365334	1375859	5495f597-b28b-4182-a0b2-b8e1b1f548b6	13	+	3	277,176,346,	0,5839,10179,	L1
chrI	1365334	1375774	69d761a0-0123-44fc-ba92-cb0a6ed33514	8	+	3	286,176,261,	0,5839,10179,	L1
chrI	1365334	1375839	928e50a1-fb3e-4b7d-9f41-13ddcb4af065	9	+	3	286,176,326,	0,5839,10179,	L1
chrI	1365335	1375777	dfdb8095-4590-4814-8dc8-b19e87a2a2b2	8	+	3	285,176,264,	0,5838,10178,	YA
chrI	1365336	1375869	86041dab-7ac4-4568-a244-95721fcf3588	10	+	3	284,176,356,	0,5837,10177,	YA
chrI	1365344	1375880	08f6e859-8c92-4874-a84b-e60f934c9ab9	8	+	3	276,176,367,	0,5829,10169,	L1
chrI	1365350	1375720	8ea7616e-e24c-426e-b8a7-e6bfa911ed22	8	+	3	270,176,207,	0,5823,10163,	YA
chrI	1371181	1375773	4067cd35-7ca6-4e69-bf49-73ed924bf059	8	+	2	168,260,	0,4332,	none
chrI	1371205	1375719	e8dbbfbd-c572-4013-8293-f747d1527ab4	6	+	2	144,206,	0,4308,	YA
chrI	1371232	1375737	526ac351-743a-43f1-8e98-6657be0bd48b	8	+	2	117,224,	0,4281,	YA
chrI	1385165	1385733	fd41cf8c-d7ce-4dd9-bcb1-af9920b3d9a8	9	-	1	568,	0,	EMB
chrI	1385172	1385868	79599921-5052-4d47-8d11-81c263829598	8	-	1	696,	0,	EMB
chrI	1385174	1386054	f4c895c7-e1aa-4db8-a822-1f80d13562dc	11	-	1	880,	0,	EMB
chrI	1385174	1385773	4e03f35b-5463-46f4-9c70-f9e024126781	9	-	1	599,	0,	EMB
chrI	1385175	1385755	822be114-0bdc-4f95-b719-28385d588917	8	-	1	580,	0,	EMB
chrI	1385175	1386160	9419225b-75f2-4932-8b01-5672a3fd4765	11	-	2	708,82,	0,903,	EMB
chrI	1385176	1385767	a78df648-fa9f-4a9c-91ae-a95015d9d151	15	-	1	591,	0,	EMB
chrI	1385176	1385700	b0369a8a-a20e-417b-af26-ef72aeffc227	8	-	1	524,	0,	YA
chrI	1385176	1385668	a45c674a-1991-47e1-98ca-4d4af5500bab	8	-	1	492,	0,	YA
chrI	1385230	1385502	c7ed3211-cc2f-4393-92d5-40f2196ba47e	11	-	1	272,	0,	L1
chrI	1385247	1385805	5ac701a5-d3a3-45c0-8eba-0e7613165d44	11	-	1	558,	0,	L1
chrI	1385304	1385828	83c8cdef-d669-4e4b-a317-acef0f10b202	8	-	1	524,	0,	EMB
chrI	1385370	1385842	04109fb8-5d5d-4988-939e-56cbda039506	8	-	1	472,	0,	EMB
chrI	1404287	1405340	8a61ee5e-f9b0-4e4c-8c8e-b79fa87d1cf7	10	+	1	1053,	0,	L1
chrI	1404545	1405270	01b758c1-cef4-4739-8db0-f9734d120138	6	+	1	725,	0,	EMB
chrI	1404568	1405324	16f97ee1-ec56-4a2a-95c3-1cc7831fccf2	6	+	1	756,	0,	EMB
chrI	1404759	1405265	4cebc535-f2be-4c3a-8538-dd0f7af5eae2	13	+	1	506,	0,	L1
chrI	1404793	1405334	c68d4788-08e0-442f-8ba8-91c6e89d1f9d	12	+	1	541,	0,	YA
chrI	1404805	1405334	9a2f5878-1928-4b5a-83f1-7cbefb056942	9	+	1	529,	0,	YA
chrI	1404829	1405266	878d8b93-94a5-405f-bf7e-1d259c35d9a1	12	+	1	437,	0,	EMB
chrI	1405066	1405333	f630a2f1-5027-43cb-ae40-ee8ecf98d2de	8	+	1	267,	0,	EMB
chrI	1405102	1405334	b587563d-83bb-4f15-9e78-bb84d107a19e	6	+	1	232,	0,	L1
chrI	1405935	1406118	335d5704-d8a5-461e-8190-7661dab12d7e	9	+	1	183,	0,	L1
chrI	1424554	1424754	21e38650-4ac3-4829-b355-3cd2521d1799	9	+	1	200,	0,	L1
chrI	1424555	1424951	1dc67ea5-9720-4c69-bd46-0d092b311e33	6	+	1	396,	0,	EMB
chrI	1424724	1425139	224ef124-0cbb-44b6-9978-6412443045a2	8	+	1	415,	0,	EMB
chrI	1424759	1425165	d529c966-9007-4699-bee3-6e813f515a95	10	+	1	406,	0,	L1
chrI	1424771	1425184	17df194f-595f-4c30-83b5-b53ddeec0e3e	8	+	1	413,	0,	EMB
chrI	1424778	1425195	adafd57a-e0f6-4512-bc35-e33c4003d8ac	6	+	1	417,	0,	YA
chrI	1424779	1425191	8f3fc815-5512-41dd-8e8e-b77e79850bbc	4	+	1	412,	0,	EMB
chrI	1424786	1425185	94dbcac1-2a6a-4319-8669-cd2d7411567f	8	+	1	399,	0,	EMB
chrI	1424788	1425195	137e3261-1fd2-433c-91b9-7921bec0e413	8	+	1	407,	0,	EMB
chrI	1424794	1425127	24b95757-4ceb-4432-b646-f4e4b9e65efa	13	+	1	333,	0,	EMB
chrI	1424800	1425195	057e898a-0b14-412f-a94c-44cd7c994f2c	10	+	1	395,	0,	EMB
chrI	1424805	1425195	2921d990-e793-4415-8596-adf8355a1b92	8	+	1	390,	0,	YA
chrI	1424806	1425195	f18b2281-681a-43b6-bd76-1e4b8f06b38e	8	+	1	389,	0,	EMB
chrI	1424806	1425197	60948c85-b122-4e82-891d-1f034b47fe62	8	+	1	391,	0,	EMB
chrI	1424811	1425195	aabc9527-11a2-4fcb-a708-642686314d58	8	+	1	384,	0,	YA
chrI	1424834	1425195	7537dae0-ce72-4eae-a83b-398c949ebc04	12	+	1	361,	0,	YA
chrI	1424840	1425189	dec447ae-a185-404d-a943-ebe8bc97849c	9	+	1	349,	0,	EMB
chrI	1424841	1425195	f905df0e-6495-413b-9f9a-fa8ee14291d9	8	+	1	354,	0,	EMB
chrI	1424841	1425156	f76aec09-61f7-4ba2-b0a1-9e372db1b5da	9	+	1	315,	0,	EMB
chrI	1424842	1425176	857e296b-3e73-4f94-8efd-7715a1d34802	16	+	1	334,	0,	L1
chrI	1424845	1425188	18d3928b-090c-4aeb-9530-3a1f2d9db212	8	+	1	343,	0,	YA
chrI	1424850	1425195	f9aebad2-797f-41c7-95fe-c0dc642c800d	6	+	1	345,	0,	EMB
chrI	1424851	1425201	9ff66c9d-c227-4901-a25b-c1504eed162c	9	+	1	350,	0,	EMB
chrI	1424853	1425195	34b3783c-d7a7-409b-821d-594d511c8b09	7	+	1	342,	0,	EMB
chrI	1424860	1425195	87de9ca2-8e28-48ca-a281-aca9212cada7	8	+	1	335,	0,	EMB
chrI	1424865	1425195	f1fcc807-2935-4ab5-bf55-5ef6d6f0b70f	8	+	1	330,	0,	YA
chrI	1424868	1425135	e038f4b2-22de-4358-a935-2de60a4e8f2c	8	+	1	267,	0,	EMB
chrI	1424868	1425184	550ee771-d80a-4f1d-92dc-b28777dc2d9e	10	+	1	316,	0,	EMB
chrI	1424869	1425195	f34a721c-15cd-48a4-9478-aa35dcc5548c	10	+	1	326,	0,	L1
chrI	1424870	1425195	5c1ef642-c360-4051-b306-24437b12e630	8	+	1	325,	0,	YA
chrI	1424874	1425195	f7c9dfa9-602e-4d40-96a8-87164db452d9	12	+	1	321,	0,	EMB
chrI	1424882	1425193	a5add250-097a-4ed4-be9e-49eba41f5a79	11	+	1	311,	0,	EMB
chrI	1424888	1425195	ec57b2a7-c459-42c8-a768-9d1fee8e5d31	10	+	1	307,	0,	YA
chrI	1424889	1425185	461bd0dc-4686-444e-8b80-41b802eee28e	8	+	1	296,	0,	EMB
chrI	1424889	1425140	a6818a25-1023-40dd-8406-97467bf502dd	8	+	1	251,	0,	YA
chrI	1424923	1425195	b32e5cd3-66e6-4e19-88bf-c19849fb4307	8	+	1	272,	0,	EMB
chrI	1424940	1425185	4d65c9f1-4130-4b69-8bab-5bd4f27023c4	4	+	1	245,	0,	EMB
chrI	1424940	1425195	dca084fa-2b76-4fc3-b408-ac2bca1ad579	6	+	1	255,	0,	EMB
chrI	1424956	1425195	c8e83ca4-2951-4ba0-b797-b213dcc27438	8	+	1	239,	0,	EMB
chrI	1424956	1425156	b80bb167-7e3d-4ef3-85c5-5eb48169d2cb	8	+	1	200,	0,	YA
chrI	1424956	1425194	c43f72ca-edd7-4823-8208-2ce6e7a83959	12	+	1	238,	0,	YA
chrI	1425189	1425918	7320a8d7-3064-4423-a991-2c00bef6a19c	6	-	1	729,	0,	EMB
chrI	1425189	1425541	7bd3d9f2-c949-4ee1-bf38-43bbc77dabd9	8	-	1	352,	0,	none
chrI	1425198	1426283	23e22253-57b2-4b77-ba09-a85df66bd59e	8	-	1	1085,	0,	EMB
chrI	1425207	1426684	c71850a8-e692-4c8e-bc63-8eb85b7f2cd5	10	-	1	1477,	0,	EMB
chrI	1425207	1425496	1a1826f6-26b7-439c-9d41-1536a75eb3f3	8	-	1	289,	0,	EMB
chrI	1425207	1425489	c26cb94b-9150-40b4-94b5-35d21b8ae514	15	-	1	282,	0,	L1
chrI	1425208	1425820	14ceda5f-2ddf-459e-aeff-ade4373372dc	6	-	1	612,	0,	EMB
chrI	1425218	1425741	9e894f05-af1f-4c05-8ed5-0fa9bfd7c531	7	-	1	523,	0,	EMB
chrI	1425255	1425568	60799fb4-8bb4-4029-99a1-080489fb5ddf	15	-	1	313,	0,	L1
chrI	1425339	1426130	f8e1a02a-3865-4f7a-bb83-3baec6e79455	4	-	1	791,	0,	EMB
chrI	1425339	1426587	436fb4f7-c96c-48c5-9a73-2a7719f4e6e6	9	-	1	1248,	0,	L1
chrI	1425367	1426742	cc24ff02-3f76-4a22-b34b-cf53686cccfa	13	-	1	1375,	0,	EMB
chrI	1425443	1426696	4f94f064-269a-4e1a-bfd3-11f7c47f7751	6	-	1	1253,	0,	EMB
chrI	1426303	1427313	3a438d4c-200e-415d-8768-670d005c9233	8	-	1	1010,	0,	EMB
chrI	1440910	1441095	3284e1b6-2cae-49fa-96ba-21b356440876	4	+	1	185,	0,	EMB
chrI	1441493	1442114	32e688a4-47df-4beb-a060-d3f3672a9cb1	6	+	1	621,	0,	EMB
chrI	1464388	1465356	4b031156-f8bd-4cc3-8cf4-5bb8d210c52a	11	+	2	83,285,	0,683,	L1
chrI	1464412	1465341	60400c35-3627-4d41-9d86-f6e4094aa4d7	9	+	2	59,270,	0,659,	L1
chrI	1464432	1465344	620bd550-752b-4b2d-b11c-96e2969c5c12	10	+	2	39,273,	0,639,	YA
chrI	1465070	1465327	10b2e59a-1346-4146-b082-d1d772630d3e	6	+	1	257,	0,	YA
chrI	1483094	1483367	10dd17f3-d074-4831-b74d-804031cce639	7	+	1	273,	0,	EMB
chrI	1483098	1483367	06ad96d9-af3a-431b-8827-048ef0f64421	6	+	1	269,	0,	YA
chrI	1489070	1489281	51702168-8de2-46ad-bdca-580b8543fd0d	6	+	1	211,	0,	L1
chrI	1490279	1490498	1db7aebd-983d-4f51-b1a1-7da193768feb	8	+	1	219,	0,	none
chrI	1490279	1490488	bf2318b5-c1d4-4661-8fd1-315424f00432	6	+	1	209,	0,	L1
chrI	1490415	1490938	4fc28cc1-314c-448b-8952-6ff16322121f	10	-	1	523,	0,	L1
chrI	1490429	1490850	66723c74-1600-4615-aa26-786e448943ff	12	-	1	421,	0,	EMB
chrI	1490432	1490815	95063d35-621b-444c-90db-6298bb555f90	12	-	1	383,	0,	L1
chrI	1490432	1490885	020adc90-4c82-4508-a13c-68bfedfad5c2	8	-	1	453,	0,	YA
chrI	1490445	1490916	b0eb32ad-11ae-4cda-88ad-7d995f261987	13	-	1	471,	0,	EMB
chrI	1490459	1490975	b1413920-71ec-4888-8809-6316ac0d8214	11	-	1	516,	0,	L1
chrI	1490487	1490975	1f9ed812-12f4-4e08-8e24-2121079e2ad4	12	-	1	488,	0,	L1
chrI	1490508	1490965	89c78fea-542d-41df-aa43-a8662dffb2c3	8	-	1	457,	0,	EMB
chrI	1490523	1490891	1f4ae0d3-f250-49ad-af13-0dc65b0e3d29	11	-	1	368,	0,	EMB
chrI	1490526	1490951	95ed13e6-ddda-4b85-b76f-6334e60741fc	10	-	1	425,	0,	EMB
chrI	1490589	1491318	89abf71c-dfbf-471d-aa2b-ea8fefd46a5b	8	-	1	729,	0,	EMB
chrI	1494361	1494934	bb667160-d774-41cf-b594-3bfb18b30b6d	8	+	1	573,	0,	EMB
chrI	1539609	1540621	11c05821-5180-4451-8ba5-bbae1d5e4105	12	+	1	1012,	0,	L1
chrI	1539706	1540601	875f5a78-8ab5-488f-b113-4a9c55069171	12	+	1	895,	0,	L1
chrI	1539720	1540844	54756b9a-7c1d-4825-8c7f-1a881a28280d	18	+	1	1124,	0,	L1
chrI	1539764	1540559	b12432cf-0d0a-478d-aea3-7ae3a001091d	9	+	1	795,	0,	EMB
chrI	1539914	1540925	82a38b42-eb06-4dc3-9f78-203c9b8fffcc	10	+	1	1011,	0,	EMB
chrI	1540092	1540475	a74b9846-b6c6-49ba-90b3-71c61b85d00d	10	+	1	383,	0,	L1
chrI	1540259	1540804	7ba6ea29-73c5-4e5f-a3f1-b0373f01d29f	7	+	1	545,	0,	EMB
chrI	1540311	1540593	aefd5d7c-0098-4a4a-b64b-33ca00ac630d	8	+	1	282,	0,	EMB
chrI	1555812	1556189	49b2b3b2-4a19-44eb-a4ff-d3b29b23e2b7	7	+	1	377,	0,	YA
chrI	1579066	1580130	c00dbf6b-678e-4e42-b040-af42c75cb601	7	+	1	1064,	0,	EMB
chrI	1579066	1580207	82b5a7fc-c359-4afc-8b64-3e94e62f8641	8	+	1	1141,	0,	EMB
chrI	1579070	1580207	0c62b840-463e-426a-a499-4a0a3747dbc2	10	+	1	1137,	0,	EMB
chrI	1579070	1580179	1b36b960-570a-47f9-a38f-828cf0e93b83	6	+	1	1109,	0,	EMB
chrI	1579084	1580196	ad7c5ac5-e95b-419d-ae68-5a03aae0ccbc	8	+	1	1112,	0,	EMB
chrI	1579084	1580180	d6df1521-2bb6-4622-8794-806b0fe5772d	6	+	1	1096,	0,	EMB
chrI	1579093	1580206	4f9750ee-185a-48c7-8105-300c10abae3e	6	+	1	1113,	0,	YA
chrI	1579096	1580207	1b0272a4-4d68-4707-93d7-b4c2714d3007	8	+	1	1111,	0,	EMB
chrI	1579110	1580205	8a42432a-63cc-4006-be72-cad796fe441a	8	+	1	1095,	0,	EMB
chrI	1579134	1580208	2a68588f-04e3-4caa-ae6e-f38a770e1b0d	7	+	1	1074,	0,	EMB
chrI	1579134	1580183	06333f7c-8212-4188-80b3-f72eedfe2656	8	+	1	1049,	0,	EMB
chrI	1579134	1580185	6c769325-1916-4107-803d-7468a5369b4c	8	+	1	1051,	0,	EMB
chrI	1579141	1580208	214a242a-68c6-49a4-b1d8-7cb6c42f3dca	8	+	1	1067,	0,	EMB
chrI	1579151	1580004	60b85e47-222f-45d6-a909-ace196b87d4b	7	+	1	853,	0,	EMB
chrI	1579167	1580197	8215dfac-f3e0-4a5d-b92c-76cf3a87d678	12	+	1	1030,	0,	YA
chrI	1579170	1580146	21160252-d655-4841-a719-e9c91275ef52	11	+	1	976,	0,	EMB
chrI	1579213	1579777	92872019-e81d-4b02-896e-30ae760a5249	6	+	1	564,	0,	EMB
chrI	1579217	1580207	a191d5b7-9690-40cb-984a-918bc93d5162	6	+	1	990,	0,	YA
chrI	1579247	1580200	8b8998d8-122b-4365-9761-f05665bb5c1a	8	+	1	953,	0,	EMB
chrI	1579280	1580103	1e025811-4f36-4410-b421-0d662ec85f85	8	+	1	823,	0,	EMB
chrI	1579293	1580059	b9b2535f-38a9-416b-9a36-40ab05c576bd	8	+	1	766,	0,	EMB
chrI	1579294	1580120	51dde8bc-8793-4bab-ad98-d1012beaed49	8	+	1	826,	0,	EMB
chrI	1579295	1580206	e79153a3-7665-4bf4-b348-51251862252b	10	+	1	911,	0,	EMB
chrI	1579310	1580195	430ab00e-eaa0-4c00-b0c2-34ab3a9df442	10	+	1	885,	0,	EMB
chrI	1579312	1580206	50df1342-df86-451b-aa7e-fac75848f26a	10	+	1	894,	0,	EMB
chrI	1579324	1580208	d81747be-d48c-46fc-aa94-23d694eeb06d	8	+	1	884,	0,	EMB
chrI	1579324	1580196	d6a10a99-9700-4fdd-a921-24a274d20aa5	8	+	1	872,	0,	EMB
chrI	1579333	1580015	82668abf-ff46-43bb-9313-8a5914c4e3c5	8	+	1	682,	0,	EMB
chrI	1579342	1580195	b0873f62-fb65-4651-92e6-11eb0ef7de2b	7	+	1	853,	0,	EMB
chrI	1579345	1580101	9915066d-acfb-4820-9b4e-abaed3c01cfe	10	+	1	756,	0,	EMB
chrI	1579355	1580206	a694b3f1-04f2-41e6-b558-9e2853d770aa	8	+	1	851,	0,	EMB
chrI	1579365	1580185	eebc768e-c15a-4380-9817-10b468631d8a	8	+	1	820,	0,	EMB
chrI	1579370	1580205	e8b57e28-46c7-40c5-8442-4cbcdce8af1a	8	+	1	835,	0,	EMB
chrI	1579371	1580195	840486a6-4912-4104-9da8-83795aa0635f	8	+	1	824,	0,	EMB
chrI	1579371	1579802	c8e77be8-69df-4f29-afbf-113fde36e831	12	+	1	431,	0,	L1
chrI	1579374	1580194	3c39cabd-3f90-4a01-a85b-acd347bbf187	8	+	1	820,	0,	EMB
chrI	1579375	1580214	9bdd2a50-931d-48ed-9ceb-90b23314eecc	6	+	1	839,	0,	EMB
chrI	1579386	1580164	cc4b7425-d0c4-47c0-8ae4-6f085173e521	8	+	1	778,	0,	EMB
chrI	1579388	1580195	ac8f1c9a-382b-4670-88f2-bb16b77f8e78	0	+	1	807,	0,	YA
chrI	1579395	1580193	7660302b-00ae-4d20-9680-69f1ab2bd60f	8	+	1	798,	0,	EMB
chrI	1579397	1579923	1aa31508-9d02-44e8-8134-ac3347cfff02	10	+	1	526,	0,	EMB
chrI	1579397	1580208	3a4b695f-508b-4180-91e0-f636b16aca61	8	+	1	811,	0,	EMB
chrI	1579400	1580208	bea127c6-add8-499b-a365-849f8621965f	8	+	1	808,	0,	EMB
chrI	1579400	1580206	dd3eb299-eda5-4ed9-967a-4a13bd44e0ad	8	+	1	806,	0,	EMB
chrI	1579400	1580196	d018c89c-e4d2-43c1-a3ee-b87492493dff	9	+	1	796,	0,	YA
chrI	1579409	1580103	33108f24-22a3-4d6f-bca3-63c89247a442	8	+	1	694,	0,	EMB
chrI	1579410	1580056	f44a675c-6377-454f-ba7f-7c7eae92f503	7	+	1	646,	0,	EMB
chrI	1579410	1580201	b40aca2d-6dd7-483d-8353-8f55e650af4b	6	+	1	791,	0,	YA
chrI	1579412	1580208	0437f296-90e5-45cf-bc35-35758167a356	6	+	1	796,	0,	EMB
chrI	1579414	1580168	9e4c522d-e104-4814-8e74-97c981f2cf60	6	+	1	754,	0,	EMB
chrI	1579422	1580071	def8b018-ba47-44a4-89e5-a3e253222ffe	8	+	1	649,	0,	EMB
chrI	1579426	1580205	7698f4b6-b706-472a-82c5-fc74b586f644	6	+	1	779,	0,	YA
chrI	1579434	1580199	8b650951-eba2-4503-88dd-60d54a0bacbf	6	+	1	765,	0,	EMB
chrI	1579436	1579975	c900c030-83bb-45a9-bbf2-75221f6ba0fc	6	+	1	539,	0,	EMB
chrI	1579438	1580195	86a67e76-4656-438b-8a23-4a57c194c12f	6	+	1	757,	0,	EMB
chrI	1579439	1580207	3e6adb17-6770-4250-b747-33ba6ef14587	8	+	1	768,	0,	EMB
chrI	1579441	1580185	bf0b588c-c453-4a23-8deb-1673730557d8	10	+	1	744,	0,	EMB
chrI	1579448	1580185	c733eb69-fe3b-4ee0-a121-20678edee621	8	+	1	737,	0,	EMB
chrI	1579453	1580206	16efdba0-06ad-49c1-b9be-3693594edf7f	10	+	1	753,	0,	EMB
chrI	1579458	1580207	279cdb6c-e07d-4a91-8a9f-115692d5bd6e	10	+	1	749,	0,	EMB
chrI	1579458	1580207	4867e0c2-bcd5-4db6-b0dd-1a17c4f35881	10	+	1	749,	0,	EMB
chrI	1579459	1580147	0c6264ab-6c80-4938-9d08-d55910ec9d58	10	+	1	688,	0,	EMB
chrI	1579460	1580151	77dd11ad-296d-49d2-a6a3-535e65e01bcc	8	+	1	691,	0,	L1
chrI	1579460	1580197	3ba1d942-8dd8-49ce-923b-b33c7b1b4ae2	10	+	1	737,	0,	YA
chrI	1579462	1580206	e4293527-ee5f-45f0-a1c2-507e681556ee	6	+	1	744,	0,	EMB
chrI	1579463	1580206	efb347dd-ba1a-4889-9681-601bc8c31aef	10	+	1	743,	0,	EMB
chrI	1579478	1580061	a716d28b-d8a0-47ee-bd99-29edefe08d52	9	+	1	583,	0,	L1
chrI	1579478	1580205	6c67a4ca-6e19-458a-8271-ccccc6733fb3	6	+	1	727,	0,	YA
chrI	1579481	1580206	9f1cd533-3836-41a8-a11d-c2a3708b76f9	8	+	1	725,	0,	YA
chrI	1579486	1580185	e8c6e426-ec7d-4699-b353-7a90fbf1c7a8	4	+	1	699,	0,	EMB
chrI	1579492	1580191	2233b4d7-e6ba-4d16-9306-49e2ea0402b9	8	+	1	699,	0,	EMB
chrI	1579498	1580207	131f5de7-cbf0-42f5-9340-fd47d75f40e5	8	+	1	709,	0,	EMB
chrI	1579502	1580207	e1144fd1-2e77-42e7-8a1c-874f7ecf50be	8	+	1	705,	0,	EMB
chrI	1579502	1580207	30dfbcfe-5e56-4966-9c14-1fe9068a05a6	6	+	1	705,	0,	EMB
chrI	1579508	1580013	e529e45a-35c2-4713-9ef8-6189a3f1abcc	11	+	1	505,	0,	EMB
chrI	1579508	1580185	cc9e16c2-2821-42e1-a65a-b65702e15793	16	+	1	677,	0,	L1
chrI	1579508	1580197	b0ee757f-3bb1-44ec-8bcf-de757947817c	16	+	1	689,	0,	L1
chrI	1579509	1580208	b2419576-9a18-4286-9919-7c7597a4ad4e	12	+	1	699,	0,	EMB
chrI	1579514	1580195	67eaae49-b9b1-4257-aed2-0dac9ba8cf6b	11	+	1	681,	0,	EMB
chrI	1579514	1580214	8f14e55e-1300-4421-89ae-dd8e9d344590	10	+	1	700,	0,	EMB
chrI	1579517	1580206	3948e44d-4bf6-42df-8e1b-e9e832d78f9b	8	+	1	689,	0,	EMB
chrI	1579517	1580181	3285c155-2ecc-40ce-b63d-17050dc19608	10	+	1	664,	0,	EMB
chrI	1579517	1580053	27b3ca03-813c-41b2-836a-2458c44ed493	10	+	1	536,	0,	L1
chrI	1579520	1580032	5cfd9f3d-6a2f-4879-97b9-ab570212b69d	8	+	1	512,	0,	EMB
chrI	1579521	1580197	ab3e744d-234a-46ca-b9df-89d52b0fbcc5	10	+	1	676,	0,	YA
chrI	1579526	1580197	78539d68-3b75-40b3-a25f-9395ac8050ed	8	+	1	671,	0,	EMB
chrI	1579528	1580195	1c86c586-290f-46f1-a15d-5c08e2bf539c	8	+	1	667,	0,	EMB
chrI	1579531	1580196	b6533b69-f0e7-4e93-8a26-1e106da09201	8	+	1	665,	0,	EMB
chrI	1579531	1580196	10ad7b65-f83b-4d0c-8266-ebb24b96036f	8	+	1	665,	0,	EMB
chrI	1579536	1580197	36119207-1688-4195-9e7d-336aff936d90	4	+	1	661,	0,	YA
chrI	1579543	1580207	4c1961fb-c5a5-46c3-835e-24473eed88d7	6	+	1	664,	0,	EMB
chrI	1579543	1580206	3ad73109-5bbf-44f9-a846-a25e1d0ca306	7	+	1	663,	0,	EMB
chrI	1579543	1580206	5cd2216e-6d48-4879-b5cf-989dace24084	10	+	1	663,	0,	YA
chrI	1579547	1580207	aae35fd9-2289-409b-80de-afef6e4776f0	11	+	1	660,	0,	EMB
chrI	1579553	1580187	72ed48e0-d939-4a0c-9b00-59f9581e0f64	6	+	1	634,	0,	EMB
chrI	1579557	1580195	5755456c-fc80-4b10-9507-8b04b3eb4409	8	+	1	638,	0,	EMB
chrI	1579559	1580195	2694d733-8b48-488d-bd6a-894641cc70ff	9	+	1	636,	0,	EMB
chrI	1579564	1580208	46c4421b-72db-4f25-b1c4-777a63a1660b	8	+	1	644,	0,	EMB
chrI	1579570	1580192	4a13440e-59b1-4ad9-8307-edadbb70dab2	7	+	1	622,	0,	EMB
chrI	1579573	1580028	447d10d4-5556-40b4-a437-cfb669e52146	8	+	1	455,	0,	EMB
chrI	1579578	1580207	c927f7d6-7425-45be-95be-96919a3d7c3f	8	+	1	629,	0,	EMB
chrI	1579584	1580214	e051e7a2-c795-40d6-9594-9e4e05d23ef8	10	+	1	630,	0,	EMB
chrI	1579585	1580103	71d3f7cf-587f-4f8a-a7be-a7ef24099112	8	+	1	518,	0,	EMB
chrI	1579585	1580198	73bd31fe-a3ad-477a-9a68-0a0beba87172	8	+	1	613,	0,	EMB
chrI	1579585	1580193	71a54568-df8b-4c5f-ad3f-d6f4c96a96ea	8	+	1	608,	0,	EMB
chrI	1579586	1580208	b3459f68-eeba-4b65-853b-dacb61f6626b	8	+	1	622,	0,	EMB
chrI	1579589	1580197	4d4179d1-88c0-46a6-8691-1d9e947c23a6	8	+	1	608,	0,	EMB
chrI	1579589	1580013	36fd7e0a-f2c7-446b-a0a5-4ca5f3afa418	8	+	1	424,	0,	EMB
chrI	1579595	1580208	271d1008-2b4d-484b-ab09-e5d2ad7f89e1	8	+	1	613,	0,	EMB
chrI	1579595	1580208	ef786b84-2314-40f1-b873-09ed4780b9d4	13	+	2	238,140,	0,473,	L1
chrI	1579596	1580126	dd1644b1-792a-44a8-bca3-1a5cb3798297	9	+	1	530,	0,	EMB
chrI	1579596	1580208	383cc7f2-6532-4cde-9fd4-aa1d283d400a	8	+	1	612,	0,	EMB
chrI	1579596	1580195	eab81226-b4f8-46e8-94d0-72bb7c64dde8	8	+	1	599,	0,	YA
chrI	1579602	1580208	9af6521a-868d-440d-bc64-d20323d5912c	10	+	1	606,	0,	EMB
chrI	1579615	1580195	021fcede-bbbc-4543-b82f-5348ecec0908	6	+	1	580,	0,	EMB
chrI	1579615	1580195	0435d48d-a778-4869-8549-8c5a42196a02	6	+	1	580,	0,	YA
chrI	1579616	1580101	14736c07-7834-4a57-8c34-abcfddb8bb1d	10	+	1	485,	0,	YA
chrI	1579650	1580185	021af9be-0361-47b4-875a-9d89f841a163	4	+	1	535,	0,	EMB
chrI	1579652	1580119	15ce0a82-1183-4228-871a-5e6bc5d5dc86	6	+	1	467,	0,	EMB
chrI	1579658	1580208	6c862070-f2a3-49d2-bc52-e9676798d3ab	6	+	1	550,	0,	EMB
chrI	1579660	1580194	d731a1e2-7923-4741-9bc8-3b98947556d7	8	+	1	534,	0,	L1
chrI	1579665	1580205	1787815d-5e35-4265-bf72-d318df53b1aa	6	+	1	540,	0,	EMB
chrI	1579665	1580214	81eac0bb-b931-4a79-b33d-9680f44bdcd4	8	+	1	549,	0,	YA
chrI	1579669	1580206	c2f47ec6-31c6-44c1-884c-cdada2bf43cd	6	+	1	537,	0,	YA
chrI	1579671	1580208	70c6902a-7d7b-4afd-b84a-550ca6e58cb5	8	+	1	537,	0,	EMB
chrI	1579681	1580198	567f6b89-9bb0-472d-bb21-b8dc8a5edf75	8	+	1	517,	0,	EMB
chrI	1579683	1580207	0ade36a1-e9e4-463b-b309-c81d43161cbf	8	+	1	524,	0,	YA
chrI	1579687	1580193	68fcc96e-330d-46a4-8b4e-1588c97bf156	10	+	1	506,	0,	EMB
chrI	1579691	1580208	18a8df24-f2bf-4e28-8908-e48a13ce9954	10	+	1	517,	0,	EMB
chrI	1579691	1580206	da065231-1583-44f0-82bf-3c6ca2f65ad7	10	+	1	515,	0,	YA
chrI	1579692	1580185	2003a1cd-f0d6-42a3-9057-7de3c4b23e2a	10	+	1	493,	0,	EMB
chrI	1579696	1580206	02ba4634-1562-4811-8d94-f7267654f402	8	+	2	111,283,	0,227,	YA
chrI	1579697	1580207	47e0a270-6609-4fbd-ba66-966414df7482	8	+	1	510,	0,	EMB
chrI	1579697	1580197	624dabb9-958e-4947-9785-c719e84c1f4d	8	+	1	500,	0,	YA
chrI	1579707	1580101	69aea8e7-9af4-4b67-baff-061c6b95f4ae	6	+	1	394,	0,	EMB
chrI	1579716	1580198	e37d538f-08f1-4e66-aac6-4100017a7fb0	6	+	1	482,	0,	EMB
chrI	1579727	1580195	b34fe25d-2897-424c-b10e-089ad5380c78	9	+	1	468,	0,	EMB
chrI	1579738	1580101	35a0b593-bfa2-41a8-a076-0057be4c4cb7	6	+	1	363,	0,	EMB
chrI	1579740	1580193	b6b4e998-e641-4f55-ad36-ce6fca3930bc	9	+	1	453,	0,	EMB
chrI	1579753	1580194	9f7657f0-ca48-4c5a-9928-4f42236840b4	7	+	1	441,	0,	YA
chrI	1579766	1580199	b93babff-8c74-4f11-8920-8458496b6b72	8	+	1	433,	0,	none
chrI	1579768	1580206	499e22f3-18eb-49cc-8511-a410b304e7db	8	+	1	438,	0,	YA
chrI	1579776	1580197	d2d3b5bc-612c-47fc-8b4d-12ef547d3a87	8	+	1	421,	0,	EMB
chrI	1579781	1580058	5b838fd5-e3d3-42b3-9982-e675b0e5b526	9	+	1	277,	0,	EMB
chrI	1579782	1580185	0d83de7b-1bbf-46ca-a378-b9a61c334d6e	8	+	1	403,	0,	EMB
chrI	1579792	1580185	c93e5e35-1796-4c2b-acff-140e8a386087	8	+	1	393,	0,	EMB
chrI	1579795	1580185	68478ddc-c1fb-4983-bbda-db9abe9e10f5	8	+	1	390,	0,	EMB
chrI	1579797	1580207	d76dd586-d065-4191-9ee7-949a1a919885	10	+	1	410,	0,	EMB
chrI	1579797	1580037	a0653fac-9564-4097-a442-706b04184a30	9	+	1	240,	0,	EMB
chrI	1579803	1580208	db01fca8-1563-4950-8c6e-f01fc36e2719	8	+	1	405,	0,	EMB
chrI	1579806	1580207	2a1ccfaf-d814-4b0b-a61a-0edd939a413a	8	+	1	401,	0,	YA
chrI	1579808	1580207	52ce3f11-57a0-40ec-83cd-abc2ee04ac4e	8	+	1	399,	0,	EMB
chrI	1579808	1580206	4768a241-020d-4195-b2cb-116d49a68250	8	+	1	398,	0,	EMB
chrI	1579808	1580206	1649e954-459c-4009-99d8-6cbe0398736f	9	+	1	398,	0,	L1
chrI	1579814	1580195	1405cf5a-43bb-4cd9-8db1-560feb078de5	8	+	1	381,	0,	EMB
chrI	1579822	1580206	2f661fa5-2cc1-4a9c-bd66-bade4efe00b3	8	+	1	384,	0,	YA
chrI	1579824	1580185	cdaa9f66-c616-4c52-94ae-242895ca184e	8	+	1	361,	0,	EMB
chrI	1579825	1580181	193c0874-6487-4c3d-90f0-cd94b1b4e24b	6	+	1	356,	0,	EMB
chrI	1579825	1580206	e611e32b-7f45-4d3e-81c8-82032c1ee6a1	10	+	1	381,	0,	YA
chrI	1579835	1580206	1d7f07ba-389c-418a-ae6b-ac047764b19f	7	+	1	371,	0,	EMB
chrI	1579836	1580206	50f34e45-3208-4d0e-853a-89649b6f5553	8	+	1	370,	0,	EMB
chrI	1579837	1580205	e1c40d1c-8f49-4b30-83d9-012e97ab4deb	10	+	1	368,	0,	EMB
chrI	1579837	1580185	7a72fe9c-e8e1-4b97-b60d-b61ca1722488	10	+	1	348,	0,	EMB
chrI	1579838	1580208	4628eb5e-15ae-4419-98ba-7eb60d7a06fa	8	+	1	370,	0,	EMB
chrI	1579838	1580206	ea3723c2-df7e-40f1-8039-9f6d6881c3db	9	+	1	368,	0,	YA
chrI	1579850	1580207	58414550-87de-478a-81ad-144be5537ea1	10	+	1	357,	0,	EMB
chrI	1579853	1580214	595f8765-f54f-4116-8c52-acbd781f3b0c	10	+	1	361,	0,	YA
chrI	1579865	1580182	9568681b-0024-4f4a-b849-59f341b908d1	10	+	1	317,	0,	YA
chrI	1579869	1580208	c4f3f476-55cd-4e80-b64c-e6eed163cf4b	12	+	1	339,	0,	L1
chrI	1579878	1580206	85a19ef2-cc67-4c7a-b2ab-188cf4545339	14	+	1	328,	0,	L1
chrI	1579878	1580103	28cc5057-2d9a-4b5e-98fa-fd03df0a75e9	10	+	1	225,	0,	YA
chrI	1579888	1580195	e1868727-9ccb-4d7d-8902-48221d27f7e9	8	+	1	307,	0,	EMB
chrI	1579889	1580206	46f76b06-e4fc-4745-b6a3-1b416ffc6877	10	+	1	317,	0,	YA
chrI	1579893	1580178	b0d0137e-d386-493c-ab2a-6739c7b59bc1	4	+	1	285,	0,	EMB
chrI	1579925	1580173	d93d7ade-bdf7-4fba-b310-a96a767cb4ef	12	+	1	248,	0,	L1
chrI	1579939	1580205	bcfde3ab-aab8-4953-914d-5e7032a56df8	10	+	1	266,	0,	EMB
chrI	1579968	1580208	c3a0ffc6-2d5d-4189-8f7d-8a1191cf822e	6	+	1	240,	0,	EMB
chrI	1593425	1593671	ed67751c-e9a6-4cf3-b30a-cb4a41219d27	6	+	1	246,	0,	YA
chrI	1606833	1607060	6a7da265-40bb-4c5f-97af-003d1f84458b	7	+	1	227,	0,	L1
chrI	1609923	1610038	37105365-a894-4fcf-85a9-58b6eb5cbcff	8	-	1	115,	0,	YA
chrI	1619894	1621340	ab84bab7-a70e-4140-b388-c9b59de7beb4	7	+	1	1446,	0,	L1
chrI	1620084	1621335	d47a173f-b1bb-42a1-8e7a-329ffab80170	8	+	1	1251,	0,	YA
chrI	1620113	1621334	3f68db57-b364-48f2-8110-d7304fea9695	12	+	2	50,877,	0,344,	L1
chrI	1620188	1621337	6a7ac187-a267-4f22-ba05-8068961b865b	9	+	1	1149,	0,	EMB
chrI	1620230	1621333	c0dbd5a6-681a-4c72-b63a-d7d679ebfae3	10	+	1	1103,	0,	EMB
chrI	1620351	1621333	08ee70ae-1a61-49eb-9b30-92382de7c8b5	6	+	1	982,	0,	EMB
chrI	1620482	1621341	37616277-7b2e-4a7e-98b7-a8ff6b4b0b92	11	+	1	859,	0,	EMB
chrI	1620498	1621266	853dde43-7d41-4257-b1a7-31bacabe3bd9	8	+	1	768,	0,	EMB
chrI	1620520	1620954	b99fee31-fbb2-4c4c-b6f0-57cd383fc2cb	11	+	1	434,	0,	L1
chrI	1620657	1621339	f05dd9f0-af14-4a64-a744-e6dd8280d14a	8	+	1	682,	0,	EMB
chrI	1620659	1621335	3ac10ea5-b018-4545-8420-51d33927733c	8	+	1	676,	0,	EMB
chrI	1620678	1621248	875090b6-3e1a-4d65-aef8-5e66cc2f93cc	6	+	1	570,	0,	YA
chrI	1620721	1621323	8a4e4500-356b-4a46-9959-1dbd34db1fa3	10	+	1	602,	0,	YA
chrI	1620817	1621334	249f24c8-95c7-4b45-8daf-6d13a4fc4c87	10	+	1	517,	0,	EMB
chrI	1620864	1621304	0ead47f6-bc03-49d4-8d71-5fb767783c41	8	+	1	440,	0,	YA
chrI	1620970	1621339	1b3b62d1-b7bd-47fd-bf81-abbb3a2bd2d7	9	+	1	369,	0,	EMB
chrI	1621146	1621339	dcccf485-c455-4863-84c0-9ed580bc0e87	8	+	1	193,	0,	YA
chrI	1621151	1621337	fa9891f7-a4f4-4b79-91ee-b4b2030aa960	10	+	1	186,	0,	L1
chrI	1629002	1629182	a0e779d8-b210-4c6b-8fae-588d2be2aba6	10	+	2	115,20,	0,160,	L1
chrI	1629006	1629199	6c3c519d-3433-4e40-8629-92e48883f078	10	+	2	111,37,	0,156,	YA
chrI	1630606	1630789	211d2576-e365-4ee4-add5-738145f328ad	6	+	1	183,	0,	L1
chrI	1642705	1643009	5101c7bc-0b70-4818-a18d-bfbf340e8728	8	+	1	304,	0,	EMB
chrI	1642735	1643009	235200ce-f6d6-46b1-8f67-eeadd84cc245	6	+	1	274,	0,	EMB
chrI	1644663	1644836	56c9d4e3-7863-4c13-b461-dce78c77c8cc	6	-	1	173,	0,	EMB
chrI	1684881	1685168	82872001-5ead-4441-8065-1ed1e59caa24	13	+	1	287,	0,	EMB
chrI	1685300	1685787	ff7d07ee-83c9-43cb-8986-2bd301336808	6	-	1	487,	0,	EMB
chrI	1685300	1686016	f89f708a-7398-4983-ac1c-7df6c61f6465	8	-	1	716,	0,	EMB
chrI	1685300	1685937	968eedce-c734-4280-a52c-70e47159c1f0	12	-	1	637,	0,	L1
chrI	1685300	1685647	82a775d1-865d-4674-995c-dbf65c08cb03	8	-	1	347,	0,	YA
chrI	1685300	1685827	72a06de2-e575-4f3e-b7e1-d8fdeaebfd9b	8	-	1	527,	0,	YA
chrI	1685300	1685788	c02d9909-f2a7-4473-9b7d-c9cc3f31ffe3	6	-	1	488,	0,	YA
chrI	1685309	1685611	8b7699d5-2daf-4ead-a947-1ef338557277	15	-	1	302,	0,	YA
chrI	1685317	1685630	a8abbb9e-7180-4675-b505-b6e384fd8517	8	-	1	313,	0,	YA
chrI	1685331	1685613	e7b9b4d0-a8a5-4060-8448-eef7205fa6c3	6	-	1	282,	0,	YA
chrI	1685403	1685782	1c2b55d1-4a68-47bb-9421-9e24f539ea85	6	-	1	379,	0,	EMB
chrI	1707777	1708584	faecc199-d2b7-45aa-ae48-ffc1c5de8f62	8	+	1	807,	0,	EMB
chrI	1707798	1708545	b02b6f06-4d79-4785-a543-4b541af5e3fa	6	+	1	747,	0,	EMB
chrI	1707806	1708574	66f9a849-3c84-4762-941b-6768d817e39d	9	+	1	768,	0,	YA
chrI	1707852	1708510	cf6f3c75-2c10-4688-b6fd-11c38ad9ce25	9	+	1	658,	0,	EMB
chrI	1707861	1708442	d1ad41c1-ff73-47cf-bb80-a86a71bcb1ce	11	+	1	581,	0,	L1
chrI	1707919	1708584	1bb21023-f4eb-414e-a8d2-391c4df57ab2	8	+	1	665,	0,	EMB
chrI	1707935	1708491	059d7ec2-a454-4ecf-8044-f1627871a424	9	+	1	556,	0,	YA
chrI	1707953	1708485	65da947b-0992-4e29-ac90-b566e8f41bed	6	+	1	532,	0,	EMB
chrI	1707965	1708583	333ef003-328d-4650-ad1d-b4bbe529c08b	8	+	1	618,	0,	EMB
chrI	1707972	1708574	c577c7c4-efe2-451f-ad71-cb7851fe06d0	6	+	1	602,	0,	EMB
chrI	1707987	1708551	f6d601e4-aa43-44a4-9671-ffbfc11b1ded	6	+	1	564,	0,	EMB
chrI	1707989	1708579	cd6cb23d-60f5-4caa-ba1c-5a498f1a223a	8	+	1	590,	0,	YA
chrI	1707998	1708576	47bb97df-5891-4c26-912f-f5a9235f73e6	7	+	1	578,	0,	EMB
chrI	1708025	1708574	9e44ec3e-ae28-48d5-94fc-c4cbaf507a6f	9	+	1	549,	0,	EMB
chrI	1708048	1708565	6184396d-1859-4515-b9d5-386db1307ce1	10	+	1	517,	0,	EMB
chrI	1708050	1708547	252895e9-1525-4156-bd3f-534e17bb9bc4	6	+	1	497,	0,	EMB
chrI	1708055	1708509	3462ca3c-f45b-4254-a913-9ef75f0274f9	8	+	1	454,	0,	EMB
chrI	1708064	1708586	ff900555-121a-4cfe-9ca9-ce246f85b7ba	16	+	1	522,	0,	L1
chrI	1708109	1708436	ee1b9a98-0896-44a2-bea6-ee0d7fa83af5	8	+	1	327,	0,	EMB
chrI	1708115	1708564	bbbacfd6-3dd2-4168-9ca3-54d24de2cc7e	8	+	1	449,	0,	EMB
chrI	1708117	1708493	23646730-5af3-49e0-8972-60a45b9ff9f6	8	+	1	376,	0,	EMB
chrI	1708133	1708501	c6566cdc-ab4f-4ab6-ac7a-9b3958d55e96	6	+	1	368,	0,	EMB
chrI	1708133	1708564	08b6f66d-4aa6-4588-8bae-7a3a0faac1f0	6	+	1	431,	0,	EMB
chrI	1708172	1708552	58a77b46-2951-4048-acd4-b9c26b6db305	6	+	1	380,	0,	EMB
chrI	1708248	1708528	04bdc290-7385-41c3-95ac-86b2f4d275ac	10	+	1	280,	0,	EMB
chrI	1708259	1708553	a2734d96-672c-4114-bb60-07b532e6197b	11	+	1	294,	0,	L1
chrI	1715249	1715505	4f17f78a-7b52-4588-93fe-a585e68be2dc	7	+	1	256,	0,	none
chrI	1715312	1715564	e688eb66-b599-4720-946f-2f88f5a1de71	6	+	1	252,	0,	YA
chrI	1718230	1718800	c8f1bcad-b889-4831-8703-d57b2bbe6f74	6	+	1	570,	0,	EMB
chrI	1721910	1722195	6cb32da9-7dd7-4577-9299-d186a46dbb7d	8	+	1	285,	0,	EMB
chrI	1730935	1731109	0844e9c9-a39e-4aa1-8ec7-cab348270920	6	+	1	174,	0,	EMB
chrI	1740054	1740681	1c5b94b6-e1dd-49d7-853e-2ca1c822d325	9	+	1	627,	0,	L1
chrI	1740055	1740678	d80edfae-f02c-4114-b40c-fb7fae2262cb	7	+	1	623,	0,	EMB
chrI	1740055	1740694	ab1ccae0-ca64-4c13-bda5-be43a64cddb2	10	+	1	639,	0,	L1
chrI	1740064	1740681	3ffa73ba-09bb-41bb-8b43-5647ee6da0ab	8	+	1	617,	0,	L1
chrI	1740081	1740694	fdbbb54f-00ba-4869-862b-610c76a9ac9a	6	+	1	613,	0,	EMB
chrI	1740086	1740669	fef51bfc-eccb-4d0f-a3de-98a5bc10d2fe	6	+	1	583,	0,	EMB
chrI	1740087	1740708	7eeea471-530f-4237-9216-ae2ef6b37403	8	+	1	621,	0,	EMB
chrI	1740090	1740706	052cc240-5da0-4201-86d1-9d77784a065e	7	+	1	616,	0,	EMB
chrI	1740105	1740661	1f3aba1c-e926-4d56-830d-543aecacfb6e	6	+	1	556,	0,	YA
chrI	1740118	1740681	5d3b1af3-8e00-4a14-afb6-3fe18e8a9884	8	+	1	563,	0,	EMB
chrI	1740143	1740706	e33c1ada-54cd-49a0-98d8-3d93a64607c3	8	+	1	563,	0,	YA
chrI	1740161	1740713	67ee0f24-426f-4f72-9302-cc25699561e1	6	+	1	552,	0,	EMB
chrI	1740188	1740731	c03bfbeb-8a6f-405b-a166-71d03b9beefb	9	+	1	543,	0,	EMB
chrI	1740188	1740696	6a42587e-3bbe-48ab-8847-93db342a53b6	8	+	1	508,	0,	YA
chrI	1740193	1740685	93e1ee11-8add-4aa4-9ef0-c6bd9e078dab	8	+	1	492,	0,	EMB
chrI	1740203	1740731	3ff04e9a-a772-4b3e-84b0-034c7b00e1d9	6	+	1	528,	0,	EMB
chrI	1740213	1740692	c5131b3b-6032-4b21-83fb-685c00a88098	7	+	1	479,	0,	EMB
chrI	1740236	1740624	893092f6-2abc-45df-96b3-5f67f7c0dd42	7	+	1	388,	0,	L1
chrI	1740236	1740695	b2f26054-b678-4945-b208-70795c5182a1	8	+	1	459,	0,	L1
chrI	1740245	1740696	fadeb44f-e365-4045-ad13-5f7752568fe8	6	+	1	451,	0,	EMB
chrI	1740246	1740695	1cbf853b-583c-479d-ba91-4c6f8ca1e3eb	6	+	1	449,	0,	YA
chrI	1740274	1740708	7ee06df2-8f06-4f15-b78c-2361afd61bca	8	+	1	434,	0,	EMB
chrI	1740295	1740669	b7ebf5cd-8b16-4201-bb6c-c70b0ca192f9	6	+	1	374,	0,	YA
chrI	1740325	1740692	0be4c242-6aa6-4cde-b746-a33d3eb324f8	12	+	1	367,	0,	EMB
chrI	1740325	1740685	afa2a772-b696-4100-8e72-b11ff2ce3f79	8	+	1	360,	0,	YA
chrI	1740326	1740705	de72416a-7558-4c48-91b4-c8a28d679bcc	7	+	1	379,	0,	EMB
chrI	1740328	1740705	e1650e4a-d3da-4092-9e9d-d0b220347b6d	8	+	1	377,	0,	EMB
chrI	1740328	1740705	7b5e8e18-bf74-406f-aecc-a8668de3fa5f	9	+	1	377,	0,	L1
chrI	1740345	1740697	d3a3f559-22b5-4b32-8c95-1117adb2c259	9	+	1	352,	0,	L1
chrI	1740353	1740671	6f93379c-c2da-426d-9e35-bfefb3290f60	9	+	1	318,	0,	YA
chrI	1740367	1740690	0b212d64-53ea-473d-86cc-571504e739ab	8	+	1	323,	0,	EMB
chrI	1740377	1740708	62a6ecc5-8905-4909-86c4-2197e0a2fa46	10	+	1	331,	0,	EMB
chrI	1740425	1740708	d17740a7-be21-4a8f-850f-2adcdfc482f0	10	+	1	283,	0,	EMB
chrI	1740439	1740697	e6f3929f-44b1-44a2-9d37-f621ff612129	11	+	1	258,	0,	L1
chrI	1740454	1740695	f1b2d113-3148-43a1-945d-1480d4685f14	8	+	1	241,	0,	EMB
chrI	1740465	1740647	c61389c7-cf4e-4ecb-8540-931a7d76caf0	12	+	1	182,	0,	EMB
chrI	1740473	1740731	21298087-abc7-4113-827c-b5f1c3735bcf	10	+	1	258,	0,	EMB
chrI	1740479	1740695	591257d6-da7c-4474-97d8-c74059635cc4	8	+	1	216,	0,	EMB
chrI	1740550	1740731	364efe4e-da18-4b32-86f0-a740a032c6e3	8	+	1	181,	0,	EMB
chrI	1740655	1740915	de669fd2-261c-4228-b57d-973197554546	8	-	1	260,	0,	YA
chrI	1742492	1742653	692b17af-efc9-4997-9f3b-0a44cf4d6ebc	8	-	1	161,	0,	EMB
chrI	1750734	1751057	4feac92a-3b1d-470f-ac85-7ea6a468a0a6	7	-	1	323,	0,	L1
chrI	1750937	1751062	ab92f73f-a840-4d3c-9a7e-e6524862633b	6	-	1	125,	0,	YA
chrI	1766220	1766568	02bd4f14-c149-4a81-83ea-a69338794944	8	+	1	348,	0,	EMB
chrI	1767883	1768450	8b29bec4-3ab7-4491-8c4a-237539e7c07e	8	+	1	567,	0,	YA
chrI	1767891	1768402	cb7dc074-676e-426d-ae03-55c5775bfcfd	8	+	1	511,	0,	YA
chrI	1767895	1768333	05923281-c2c3-47dc-81c6-b72baf287854	8	+	1	438,	0,	YA
chrI	1789555	1789969	a10ca1db-0783-4c83-ac23-ae5975517714	9	+	1	414,	0,	YA
chrI	1789566	1790154	684cabad-54a5-463a-88f9-8aaf9dc56ee1	11	+	1	588,	0,	YA
chrI	1789588	1790147	67100aa5-0f27-4272-957e-da93fa3534b5	8	+	1	559,	0,	YA
chrI	1789631	1790153	9349db89-ccdf-4464-af62-1a70d94d6a1c	4	+	1	522,	0,	EMB
chrI	1789670	1790136	b1177bc0-03c6-4b10-a3d0-c9949dc2b4a2	7	+	1	466,	0,	L1
chrI	1789698	1790142	267b55ac-8678-4728-b44c-029d42eda772	9	+	1	444,	0,	EMB
chrI	1789698	1790109	a74f4b91-4dc2-429e-8886-7af05fa94c8b	6	+	1	411,	0,	YA
chrI	1789731	1790136	51e3c8e2-77bb-46fe-9c4f-4bfcf47f0258	6	+	1	405,	0,	EMB
chrI	1789745	1790143	a0d680f1-0131-4340-9199-0b8f8626107d	7	+	1	398,	0,	YA
chrI	1789763	1790155	ca02892f-83f1-49b9-9fd5-b7d3cfd04088	6	+	1	392,	0,	EMB
chrI	1811545	1811721	8076885d-d547-4373-9b10-d361726db25c	6	+	1	176,	0,	L1
chrI	1811625	1811771	68fabf2c-f283-44d6-b424-4c83ffd4fcbe	11	+	1	146,	0,	L1
chrI	1835745	1841935	58821295-4ee0-4a12-8092-51b16d05e1b9	8	+	8	308,128,218,129,130,154,108,1130,	0,2413,3034,3318,3505,4349,4573,5060,	EMB
chrI	1835755	1841919	b21a2e36-714c-4b65-8390-bc382308d7fd	6	+	8	298,128,218,129,130,154,108,1114,	0,2403,3024,3308,3495,4339,4563,5050,	EMB
chrI	1835770	1841881	4e1913dc-2f64-4af4-bc05-3118fe3a731b	6	+	8	283,128,218,129,130,154,108,1076,	0,2388,3009,3293,3480,4324,4548,5035,	YA
chrI	1835783	1841946	9a9780ac-d858-4ddc-a07d-37568e3e2ba0	8	+	6	270,128,218,129,39,53,	0,2375,2996,3280,3467,6110,	L1
chrI	1835784	1841926	e2f089e5-674f-4ed1-a82c-e34bbc74c77f	6	+	7	269,128,218,129,130,24,74,	0,2374,2995,3279,3466,4310,6068,	EMB
chrI	1835794	1841937	32c4f171-65c7-4960-92f7-cec2a99e36f7	8	+	8	269,119,218,129,130,154,108,1132,	0,2373,2985,3269,3456,4300,4524,5011,	EMB
chrI	1835813	1841861	a439303d-ba81-43a8-afd7-cee273ca1097	8	+	8	240,128,218,129,130,158,108,1056,	0,2345,2966,3250,3437,4281,4505,4992,	EMB
chrI	1835840	1841591	ae04b4a8-467f-4194-ac28-688df25c3311	8	+	8	213,128,218,129,130,154,108,786,	0,2318,2939,3223,3410,4254,4478,4965,	EMB
chrI	1835873	1841950	929c994b-6ca0-4dcf-8877-a7b939210242	7	+	8	180,128,218,129,130,154,108,1145,	0,2285,2906,3190,3377,4221,4445,4932,	L1
chrI	1835889	1840933	00b43eac-b5bb-4a70-8de5-87dcdd95a356	12	+	8	164,128,218,129,130,154,108,128,	0,2269,2890,3174,3361,4205,4429,4916,	L1
chrI	1835898	1841924	53b4ee1e-976c-4007-a164-2084734862ba	4	+	8	155,128,218,129,130,154,108,1119,	0,2260,2881,3165,3352,4196,4420,4907,	YA
chrI	1835911	1841576	9094600d-b8fd-4fdd-afec-6214bb668c54	8	+	8	142,128,218,129,130,154,108,771,	0,2247,2868,3152,3339,4183,4407,4894,	EMB
chrI	1835917	1840909	ca7837ad-cb1d-4ab6-8ef6-90c12d62a29a	6	+	6	136,128,218,129,58,104,	0,2241,2862,3146,3333,4888,	EMB
chrI	1835929	1840249	f9e837ab-0f9e-4bd8-a117-a2ead679f658	4	+	6	124,128,218,129,130,155,	0,2229,2850,3134,3321,4165,	EMB
chrI	1835935	1840933	951dae9b-882d-4f5d-a6db-b2c94a373da6	8	+	8	118,119,218,129,130,154,108,128,	0,2232,2844,3128,3315,4159,4383,4870,	EMB
chrI	1835961	1841937	7e52b47f-f8ee-460d-8ad6-1b49d707525b	6	+	8	92,128,218,129,130,154,108,1132,	0,2197,2818,3102,3289,4133,4357,4844,	EMB
chrI	1836659	1841759	f6a135b0-856a-465f-b066-b9c423b10444	6	+	8	849,128,218,129,130,158,108,954,	0,1499,2120,2404,2591,3435,3659,4146,	EMB
chrI	1838162	1840426	eaaebe15-ccdc-4e16-9a5f-2681219b9113	8	+	6	124,218,129,130,154,108,	0,617,901,1088,1932,2156,	EMB
chrI	1838208	1841935	ce900956-266a-4345-9fb5-bb02d1a4a98b	6	+	7	78,218,129,130,154,108,1130,	0,571,855,1042,1886,2110,2597,	EMB
chrI	1838784	1840404	7b2cd53e-217c-4b80-88f9-6084a008ebf2	6	+	5	213,129,130,154,86,	0,279,466,1310,1534,	EMB
chrI	1838807	1840933	910a95d0-0180-4e4d-ab0f-0d6005ab5544	6	+	5	190,129,130,332,128,	0,256,443,1287,1998,	EMB
chrI	1838814	1841024	06ff6fbf-173b-4c02-8cc0-6f9905b47115	10	+	4	183,129,36,219,	0,249,436,1991,	L1
chrI	1839107	1841943	4dffca04-cdd9-4a3d-9a56-9a248500ee95	10	+	5	85,106,158,108,1138,	0,143,987,1211,1698,	EMB
chrI	1839138	1841946	c2ce96e4-4d1c-476b-a356-680d21c7739f	8	+	6	54,130,154,108,639,258,	0,112,956,1180,1667,2550,	EMB
chrI	1839249	1841927	acf79b3c-1a80-4f29-9f57-8608be99b179	6	+	4	131,158,108,1122,	0,845,1069,1556,	EMB
chrI	1839249	1841668	cae22239-51d1-4f26-9e1e-8e91c8589602	6	+	4	131,154,108,863,	0,845,1069,1556,	L1
chrI	1839250	1841667	508a380d-72cd-444b-92f5-b20bda5dcb1a	9	+	4	130,154,108,862,	0,844,1068,1555,	EMB
chrI	1839697	1840000	c65e9d7a-7431-418e-99f9-8d0284a37b40	6	-	1	303,	0,	YA
chrI	1841336	1841925	ca7f147d-ac0b-44cc-b4f2-fcbf9647ffef	8	+	1	589,	0,	none
chrI	1841506	1841937	45144b2c-691f-4b4c-a459-0b6d6f9d1c26	7	+	1	431,	0,	L1
chrI	1852650	1852799	b8ee3569-792f-4394-b0d1-460247eaf51c	7	-	1	149,	0,	EMB
chrI	1860679	1861055	87f5410a-677f-4b02-b684-71a8e401d45f	6	+	1	376,	0,	EMB
chrI	1862606	1862877	8346e886-4dfa-46d0-a7e4-3d84de560737	18	-	1	271,	0,	L1
chrI	1862610	1862866	9a16ef42-209a-445d-880c-284b17b947e6	8	-	1	256,	0,	EMB
chrI	1862616	1862890	0430234f-2ada-4b27-9317-02bfc7c6ad11	6	-	1	274,	0,	EMB
chrI	1862616	1862843	3a1ce260-1a00-46ba-93c5-4f7c1ea9e0c2	8	-	1	227,	0,	EMB
chrI	1862616	1862931	b267f347-af71-462b-a288-835bb3de83f5	8	-	1	315,	0,	EMB
chrI	1862617	1862806	f83de3e9-c1b5-4a73-be53-af59540af648	8	-	1	189,	0,	YA
chrI	1862632	1862901	387a483a-afad-4eb8-929e-c6768dc74ab9	5	-	1	269,	0,	EMB
chrI	1862660	1862962	ea1ea006-708c-4311-a419-c2d718cbfb3c	7	-	1	302,	0,	YA
chrI	1862674	1862951	67d9dce4-8fa7-41c1-aee7-4e48d8098e13	6	-	1	277,	0,	EMB
chrI	1862706	1862910	d8ff65ec-0407-41ae-876b-655270f68c78	6	-	1	204,	0,	EMB
chrI	1862749	1863021	d8719380-2813-46fa-8014-ae0acd3c660f	6	-	1	272,	0,	EMB
chrI	1862833	1863115	af11f09c-f696-40a7-b393-5eb7ffcbb789	6	-	1	282,	0,	EMB
chrI	1862922	1863185	fd9aba91-6577-4bfc-bc83-802b75e4b972	8	-	1	263,	0,	EMB
chrI	1879522	1884153	24decde9-0c97-42f2-8b19-eb3dc2f1524d	8	+	3	687,306,819,	0,2406,3812,	EMB
chrI	1879886	1884192	56ab1ea3-de63-4466-b460-6a31c87d4531	4	+	3	323,306,858,	0,2042,3448,	EMB
chrI	1879901	1883635	0f8b3a74-9c4c-4833-9c41-87feac2b667c	8	+	3	308,306,301,	0,2027,3433,	EMB
chrI	1879942	1884159	9269544c-a1da-4617-8136-8a03812d00f2	6	+	3	267,306,825,	0,1986,3392,	YA
chrI	1879954	1884194	8e2b3f82-3231-487b-96da-a47ee4c0a1c7	10	+	3	255,306,860,	0,1974,3380,	EMB
chrI	1879998	1884192	70908d86-7a27-4723-81aa-29589edac302	6	+	3	211,306,858,	0,1930,3336,	YA
chrI	1880155	1883791	e8abf0e9-3404-466d-a19d-b8b08f4d1417	6	+	3	58,306,457,	0,1773,3179,	EMB
chrI	1881927	1884053	c740851b-1128-434e-8cc9-d5ac52f05ad6	9	+	2	307,719,	0,1407,	L1
chrI	1881943	1884124	6d2f55e1-6e8f-4831-9d88-d587281ffee8	6	+	2	291,790,	0,1391,	EMB
chrI	1881991	1884019	3addd7ef-1046-414c-8112-158bf3e441c0	6	+	2	243,685,	0,1343,	EMB
chrI	1882020	1884196	a78321c1-a5ae-4c7f-9578-b4a69fea3379	12	+	2	214,862,	0,1314,	EMB
chrI	1882059	1883626	dc48ba92-c063-425c-80b1-bb17a181a039	9	+	2	175,292,	0,1275,	L1
chrI	1882096	1884144	2f713d9b-4283-424d-bca6-1c700f9d2104	14	+	2	138,810,	0,1238,	L1
chrI	1882119	1884161	12ddcf45-6496-4608-adeb-e2dd0f058855	14	+	2	115,827,	0,1215,	EMB
chrI	1882135	1884196	8ef12186-5d4e-451c-bd3a-948751e2abbd	10	+	2	99,862,	0,1199,	YA
chrI	1882157	1884192	8743449d-aee5-4cf8-b97c-45125d13b2cb	11	+	2	77,858,	0,1177,	L1
chrI	1883327	1884194	1fffd137-c154-4fc0-9f50-3528a49f7ed2	10	+	1	867,	0,	L1
chrI	1883328	1883677	fa1515e3-897d-49c4-9509-25332fe88961	8	+	1	349,	0,	EMB
chrI	1883328	1884064	babe5b7d-f474-40c7-bffd-a7c3b66e53b8	6	+	1	736,	0,	EMB
chrI	1883330	1884164	59439b74-5b20-4042-a171-04c9279a0624	11	+	1	834,	0,	L1
chrI	1883335	1884107	0adc0e02-bbc4-45a5-9722-16af73a1dc40	19	+	1	772,	0,	L1
chrI	1883348	1884192	214aa08c-5e17-422a-b15f-686fb4efc399	10	+	1	844,	0,	YA
chrI	1883370	1884143	691ca6c4-56ae-4f9e-85f0-574f9c0169ea	8	+	1	773,	0,	none
chrI	1883389	1884192	09217521-1727-4545-ae82-51af7f4b12ca	7	+	1	803,	0,	EMB
chrI	1883417	1884159	8a611e81-f0c0-4d0f-87f5-94cae5841cad	8	+	1	742,	0,	L1
chrI	1883426	1884178	258c7755-7724-421a-bea2-9968a8d4b52e	6	+	1	752,	0,	EMB
chrI	1883467	1884192	40cf8ff1-d017-42ed-a404-eece6bedca9b	10	+	1	725,	0,	L1
chrI	1883479	1884194	57c385f1-3dce-4ca3-a16c-f6665800d6e5	8	+	1	715,	0,	EMB
chrI	1883506	1884192	8dc5b835-a5d5-42c9-b8a2-4f7906b6393a	6	+	1	686,	0,	YA
chrI	1883521	1884160	5443cdcc-aaef-45bc-8efc-06846a1aa85d	8	+	1	639,	0,	YA
chrI	1883524	1884189	cba248f8-c622-47cb-b358-2f8ab8fc139b	6	+	1	665,	0,	YA
chrI	1883525	1884190	41d901bd-0e12-4077-91b9-a6f9028f558f	8	+	1	665,	0,	EMB
chrI	1883531	1884190	ef893a15-43ff-4aa4-97f9-2bb88f1cfbd5	8	+	1	659,	0,	EMB
chrI	1883539	1884192	7e617e70-041d-4bed-99f8-98fb06784e03	7	+	1	653,	0,	YA
chrI	1883559	1884184	d0f73167-db64-432c-8e03-6ffdd0429885	10	+	1	625,	0,	YA
chrI	1883572	1884101	367d3ee9-ff32-496d-be00-da5b0a47be54	8	+	1	529,	0,	EMB
chrI	1883574	1884186	65cb7674-c85c-46a3-a30f-230e462aa0f2	6	+	1	612,	0,	EMB
chrI	1883584	1884194	c395aa96-4c46-4829-9078-9485b3c4d670	8	+	1	610,	0,	EMB
chrI	1883585	1884192	05ae3a2f-7b19-4925-8ba1-d5f1daad8488	8	+	1	607,	0,	EMB
chrI	1883585	1884044	6e9bad6e-2d90-4050-839d-bcdb0fc3518e	6	+	1	459,	0,	L1
chrI	1883592	1884192	259f5ecc-658e-4b72-8e31-622c276e564e	13	+	1	600,	0,	L1
chrI	1883605	1884196	540447fb-7058-411c-bc94-29e912a087d5	10	+	1	591,	0,	EMB
chrI	1883615	1884192	be2dfc2c-9249-4a01-b078-6d5441298076	20	+	1	577,	0,	L1
chrI	1883643	1884193	4cecc57e-0a40-4462-895e-a8bfd0907288	6	+	1	550,	0,	EMB
chrI	1883650	1883927	e16a4b48-ede8-416b-bab8-866beccda700	10	+	1	277,	0,	EMB
chrI	1883650	1884189	4eca82a4-d619-4180-ac1e-3492d56c662b	8	+	1	539,	0,	YA
chrI	1883659	1884192	5de67163-4f78-411c-aa0f-2c81cb325062	8	+	1	533,	0,	EMB
chrI	1883659	1884107	54aeca47-d64b-4e59-a1ad-7c27c0dec470	7	+	1	448,	0,	EMB
chrI	1883659	1884106	c45fc597-30aa-4747-b2fb-0acd4b9ebee0	12	+	1	447,	0,	L1
chrI	1883665	1884192	4a02156f-3981-4750-827c-0cec123e2325	6	+	1	527,	0,	EMB
chrI	1883667	1884194	3b6b6268-fade-494c-96f2-e21b157fbefc	11	+	1	527,	0,	L1
chrI	1883674	1884190	5842f2a8-4874-45a3-b394-25ef46d9c2df	8	+	1	516,	0,	none
chrI	1883718	1884106	80e36350-3ffc-46a1-a824-4f0c822c9d3a	10	+	1	388,	0,	EMB
chrI	1883745	1884192	4691b227-0834-4a51-98e8-7b23736ad0a9	10	+	1	447,	0,	L1
chrI	1883799	1884099	2faacc8c-c6d0-4c2c-80a3-3a5582b9131b	9	+	1	300,	0,	L1
chrI	1883802	1884184	0ac23719-c24b-4117-b2bf-a193c29d7b0e	10	+	1	382,	0,	L1
chrI	1883809	1884194	ef9fc621-8361-42eb-bbae-219b960a234f	5	+	1	385,	0,	EMB
chrI	1883844	1884143	91d220dd-a75e-4e24-b206-02335bf4792a	6	+	1	299,	0,	EMB
chrI	1883848	1884153	747c14e8-9b11-4a10-8d95-13dda12bb725	10	+	1	305,	0,	YA
chrI	1883870	1884189	551ab806-e5fd-4757-b6e3-d6da8c9595bd	15	+	1	319,	0,	L1
chrI	1883918	1884193	b939a18e-4f8a-4d1f-881a-17858785506b	6	+	1	275,	0,	L1
chrI	1883958	1884183	2da78d5b-dd13-4d75-a653-4abd8b68d61f	10	+	1	225,	0,	EMB
chrI	1883965	1884191	6a85ea09-6b3e-4c13-ac1d-8db750a7bf4b	6	+	1	226,	0,	YA
chrI	1883977	1884200	641f70b9-8839-4a7e-bd45-c2a4de743cf2	8	+	1	223,	0,	EMB
chrI	1900310	1900428	0c3bd3e2-f940-4394-b34d-4f757b6e8b05	8	+	1	118,	0,	YA
chrI	1922783	1923065	a501f2a3-1760-4da0-9362-646d61e5d011	6	+	1	282,	0,	YA
chrI	1922786	1923079	5cbd3b09-985c-4b51-93ef-e7a9de95c1b8	8	+	1	293,	0,	EMB
chrI	1922852	1923079	3cb1d972-b9f6-4b44-a570-865c307f2a57	6	+	1	227,	0,	YA
chrI	1931841	1932134	02f1f47a-2a34-4bb1-b00b-e6ac69f5b139	13	+	1	293,	0,	EMB
chrI	1931904	1932248	a28e4fbb-2624-473f-9771-8b094ddca186	10	+	1	344,	0,	YA
chrI	1931923	1932259	76e28845-d505-4fc7-b1e1-d8ba38cff4b1	8	+	1	336,	0,	YA
chrI	1931943	1932255	391f227c-586e-4a86-891f-4e706c9d92d7	10	+	1	312,	0,	YA
chrI	1931953	1932261	735f8bbe-d308-43f2-ae3d-ecf351f3b68d	8	+	1	308,	0,	YA
chrI	1931958	1932261	56b54cc5-ad2e-4a90-8662-6a9662f7e8f0	8	+	1	303,	0,	EMB
chrI	1931963	1932197	81f63ce6-4c6b-4c1a-9d86-8f012e187b9f	11	+	1	234,	0,	L1
chrI	1932003	1932216	8e4eb285-e871-4252-ae15-5b99c4cac8bd	10	+	1	213,	0,	EMB
chrI	1932036	1932248	f97e4ad6-59b0-4e2d-9537-4c1cbdf80f9e	8	+	1	212,	0,	YA
chrI	1932133	1932261	67a9d143-ba53-427b-b5bf-39528359efbe	11	+	1	128,	0,	EMB
chrI	1934575	1935013	bfaf28ff-c2f5-4289-bd1d-0ce3e069715d	9	+	1	438,	0,	EMB
chrI	1934575	1935119	6dc5ea68-d779-45ad-adcc-c9ee18996c40	8	+	1	544,	0,	EMB
chrI	1941224	1941541	6238a339-aebd-4ecf-8af3-d1c43167ee2e	6	+	1	317,	0,	EMB
chrI	1950676	1950907	4a351a60-99d1-46cc-9a62-b446c9af465e	6	-	1	231,	0,	EMB
chrI	1965108	1966260	a95a7740-3cba-41d6-a342-3d5a40921b09	10	+	1	1152,	0,	L1
chrI	1965138	1966314	458298aa-3e65-4cb6-9ec9-568d3d2141b6	8	+	2	8,554,	0,622,	YA
chrI	1965270	1966453	a20af171-6aa4-4de3-93fa-636ae5873a30	8	+	1	1183,	0,	EMB
chrI	1965280	1966453	c54e04e7-419c-4f51-8e3e-c1032b36269f	10	+	1	1173,	0,	EMB
chrI	1965408	1966454	3e9a3b64-83d6-4dce-8c99-c2f3b36a5ef5	15	+	1	1046,	0,	L1
chrI	1965446	1966453	fa73d20a-6fd4-4713-9f18-e014c8f5b167	12	+	1	1007,	0,	L1
chrI	1965497	1966454	61305195-b651-4492-b474-453e8130445e	8	+	1	957,	0,	EMB
chrI	1965570	1966396	658f9538-b96c-4bed-8f4d-0f798cb036f8	6	+	1	826,	0,	EMB
chrI	1965614	1966444	03d05620-b0df-4db0-9903-62ca6d22c4c1	13	+	1	830,	0,	L1
chrI	1965639	1966453	334256e8-1f64-4368-8f6f-95136a8a9edd	10	+	1	814,	0,	YA
chrI	1965647	1966452	d7ca132f-52db-4d12-b45f-39df1100e5c2	10	+	2	12,376,	0,429,	EMB
chrI	1965676	1966446	b8e8c460-798b-4c66-82a8-f9e35a4712c4	14	+	1	770,	0,	L1
chrI	1965691	1966403	1d1d3e72-3e67-4474-846b-42a870e40931	11	+	1	712,	0,	EMB
chrI	1965816	1966457	a90432a0-8e66-4a9a-8d92-415e1e66b2dd	10	+	1	641,	0,	EMB
chrI	1965823	1966314	bdc0f28c-9907-4d06-bec7-cfdef4fa90a4	10	+	1	491,	0,	EMB
chrI	1965867	1966396	765560ec-fe0d-49c7-aaac-82df5a34783b	13	+	1	529,	0,	L1
chrI	1965869	1966447	b33e0cf1-9e9b-4b16-9c7e-120e2536239b	8	+	1	578,	0,	EMB
chrI	1965981	1966454	4cc78923-56a2-4642-b7c6-4f9f5c3df292	8	+	1	473,	0,	EMB
chrI	1966008	1966453	abfd9f21-c645-43b9-a86d-673fe4cd1f5e	8	+	1	445,	0,	EMB
chrI	1966022	1966454	ef2c0046-ca71-45c5-bdff-d14d1b570333	8	+	1	432,	0,	YA
chrI	1966044	1966444	13c09b55-4499-464f-a802-f6b5f4de3cf7	6	+	1	400,	0,	EMB
chrI	1966047	1966453	5aeb7fe2-0974-4c1d-bbf9-0fe9ec942e75	7	+	1	406,	0,	EMB
chrI	1966058	1966455	80aa8dcf-d47e-4bae-bb35-2869fdc94c78	5	+	1	397,	0,	EMB
chrI	1966063	1966430	045c5bd2-3a59-44d6-a461-7c087dcca16e	8	+	1	367,	0,	EMB
chrI	1966126	1966453	bfc5db90-bc07-497e-b702-532da372b157	9	+	1	327,	0,	EMB
chrI	1966131	1966442	c4208069-44da-413e-965e-e6e4043e21cb	9	+	1	311,	0,	EMB
chrI	1966163	1966454	73633cfa-5624-495c-829b-5f7b4349d035	9	+	1	291,	0,	EMB
chrI	1973696	1974389	50b31231-f879-4221-be13-42cc803f8db6	8	+	1	693,	0,	L1
chrI	1973708	1973978	c490bc40-2283-41b5-b085-2c1a9aa67679	8	+	1	270,	0,	EMB
chrI	1973742	1974340	172d6b23-a031-42b8-b07f-a80875d51ca1	8	+	1	598,	0,	EMB
chrI	1973745	1974260	be7613ae-89bd-4943-99e2-9e81aac0c02e	10	+	1	515,	0,	YA
chrI	1973745	1974338	59c1125d-eba1-40fd-b59d-59558526a7fe	8	+	1	593,	0,	YA
chrI	1973748	1974392	a5d1af74-99d2-47ae-b8a6-c2b7f858b45c	9	+	1	644,	0,	EMB
chrI	1973749	1974396	bf9d7df4-73e2-4ceb-bec8-d2859e7caa47	6	+	1	647,	0,	YA
chrI	1973751	1974371	4662eddf-98ba-4bf2-a160-f01c6e4203ba	6	+	1	620,	0,	YA
chrI	1973756	1974391	4ba33c48-e642-4638-8a64-fd9c4a703212	7	+	1	635,	0,	EMB
chrI	1973766	1974383	f0c47023-d1b5-4eec-8305-f79d55efc9d5	6	+	1	617,	0,	YA
chrI	1973769	1974367	57e483dc-e1c9-439c-9be5-315b40a97ba3	10	+	1	598,	0,	EMB
chrI	1973770	1974390	e1cd98c8-7aa6-412b-8234-e0b69bcd1f66	8	+	1	620,	0,	YA
chrI	1973770	1974389	7fd7841e-e02b-4d67-be2f-f19070f319d3	6	+	1	619,	0,	YA
chrI	1973786	1974394	57e66e80-23eb-4d0f-8d34-8e45274d6342	6	+	1	608,	0,	EMB
chrI	1973796	1974381	f293fca5-8ec1-40a9-bbe0-a0a10b55d6da	6	+	1	585,	0,	YA
chrI	1973801	1974343	06ae5d76-b0c7-415d-a766-8edf43390913	6	+	1	542,	0,	YA
chrI	1973802	1974392	d665b6e8-60c4-4e20-821c-3c109ef1fbaa	10	+	1	590,	0,	YA
chrI	1973802	1974392	07c79324-9443-437e-830e-71a1ae92f012	6	+	1	590,	0,	YA
chrI	1973809	1974395	6163db38-7681-4658-b8d6-93d06838691c	8	+	1	586,	0,	YA
chrI	1973812	1974102	e5c02a60-a6ce-4fe6-9ae1-9d0762e75f1f	10	+	1	290,	0,	EMB
chrI	1973856	1974383	9e6e1394-959b-4249-83a4-6165dc1a69f6	6	+	1	527,	0,	YA
chrI	1973867	1974394	a637efef-84cd-487b-9772-319c9436f5b3	8	+	1	527,	0,	EMB
chrI	1973874	1974394	20b7328f-7337-4632-bfc3-1715eaa1738f	12	+	1	520,	0,	L1
chrI	1973896	1974391	120de5ec-4e7b-45d8-8592-c4ef0b43eb4e	6	+	1	495,	0,	EMB
chrI	1973927	1974348	64d9e6d1-1ea1-467f-a583-f1b9115aff41	8	+	1	421,	0,	YA
chrI	1973927	1974346	0cb5be9b-a511-46f6-8140-9bd3e70e8ce1	8	+	1	419,	0,	YA
chrI	1973928	1974344	a41635e8-6b02-4f2a-aadc-232d752b17e0	7	+	1	416,	0,	L1
chrI	1973938	1974345	a6716d1e-04a9-4852-b4ce-4357e012b7ff	6	+	1	407,	0,	EMB
chrI	1973942	1974333	032f72e4-0e5e-4a09-b92d-861a9bf5f160	6	+	1	391,	0,	EMB
chrI	1973943	1974394	7e2b8aaa-9910-4a81-aaee-7a859490da74	6	+	1	451,	0,	YA
chrI	1973949	1974338	8510539f-c988-41a2-a5b7-566d0e9f6c9d	6	+	1	389,	0,	EMB
chrI	1973953	1974337	ce0f66d9-840e-4487-b2b7-ba344a8b0b9a	6	+	1	384,	0,	EMB
chrI	1973957	1974394	d655ff32-b1a0-43dd-9b68-c85d322b89fb	6	+	1	437,	0,	YA
chrI	1973997	1974343	f8ef0daa-7ff6-4cf9-a0fd-1e439ce4bf9b	8	+	1	346,	0,	YA
chrI	1973998	1974383	dc2322c0-5092-4f96-bde6-41fe540f835f	8	+	1	385,	0,	EMB
chrI	1974055	1974392	6ab529fd-4df4-4dc2-b8b7-11127b33a89c	8	+	1	337,	0,	EMB
chrI	1974055	1974385	ba6ee4db-c4c5-47d0-bcd8-cd0815715335	12	+	1	330,	0,	L1
chrI	1974055	1974394	dc6021c0-ccc8-4afc-9ba5-bd2da72dbb49	8	+	1	339,	0,	YA
chrI	1974056	1974385	9fb88f8c-207c-40bc-bce9-5bf546cfac5f	8	+	1	329,	0,	EMB
chrI	1974059	1974393	621a7877-b5c7-4a6d-bd97-ccbb94fed799	7	+	1	334,	0,	YA
chrI	1974071	1974347	3270138c-4d34-4e85-8598-08885bb9e468	6	+	1	276,	0,	EMB
chrI	1974129	1974389	79fe95d4-79d4-41b2-be55-424010936b7d	6	+	1	260,	0,	EMB
chrI	1974148	1974394	ca8cb955-df24-4ec7-99cc-96a2138296f4	8	+	1	246,	0,	YA
chrI	1983179	1983416	fb91c518-fbef-418c-b19f-ecd5fca463af	6	+	1	237,	0,	EMB
chrI	1983180	1983404	9f2cc92e-e90d-47db-ada8-858b77d6b88f	8	+	1	224,	0,	YA
chrI	1983204	1983414	cfe96cec-5931-4239-a2fc-6438c1776ada	6	+	1	210,	0,	EMB
chrI	1986493	1987343	50e3ef7a-4723-4308-b9bb-1b5923f9c2e9	8	-	1	850,	0,	EMB
chrI	1986498	1986990	194d3746-23bc-4488-a1df-47686211e05f	10	-	1	492,	0,	EMB
chrI	1986498	1987718	5fd806f4-7224-4e36-8240-de3a96fef8a5	8	-	1	1220,	0,	EMB
chrI	1986499	1987252	716a6e3d-33ab-4f02-97b3-44bc4647e459	10	-	1	753,	0,	EMB
chrI	1986499	1987608	7782c5ad-9fb6-4a00-bb21-3c1ebc147451	8	-	1	1109,	0,	YA
chrI	1986499	1988332	60a06b64-bb7f-42f4-beb9-8ea4c6a5699d	6	-	1	1833,	0,	YA
chrI	1986500	1987575	46cc337e-77a7-4b05-ad83-05bc91daaa1d	8	-	1	1075,	0,	EMB
chrI	1986500	1987845	a574a90c-98bd-43e7-aced-5bc6714cb1ce	10	-	1	1345,	0,	EMB
chrI	1986500	1986928	d5a63c38-de4d-42a2-aee0-a9bccb422c77	12	-	1	428,	0,	L1
chrI	1986500	1987384	614552c3-2caa-477d-a33f-64979b70d0b8	10	-	1	884,	0,	L1
chrI	1986504	1987324	9821123f-3493-4106-9a79-c8392713b252	7	-	1	820,	0,	EMB
chrI	1986505	1986881	1d88ea91-ee1b-4003-b402-780e8b71ab95	9	-	1	376,	0,	EMB
chrI	1986505	1987656	8a51185d-1651-4527-b053-6d8b68a21fd5	8	-	1	1151,	0,	EMB
chrI	1986505	1987390	ba6efaef-f803-4c83-9a5b-bdbd14c75ec6	6	-	1	885,	0,	EMB
chrI	1986505	1987245	1153778d-fe07-4ca2-98e8-e40d08770ac8	8	-	1	740,	0,	EMB
chrI	1986510	1987617	9380a635-de10-4eaf-94f4-55c07070fa1b	6	-	1	1107,	0,	EMB
chrI	1986510	1987248	7b2c18f7-1fed-4ae9-a9cb-e8bb4091697c	8	-	1	738,	0,	YA
chrI	1986510	1988004	5feed7a2-d967-4939-b30e-0ccccdf7689b	8	-	1	1494,	0,	YA
chrI	1986512	1987292	4cbbf22e-0f4b-4ba3-afac-651d815b9bc3	8	-	1	780,	0,	L1
chrI	1986512	1987300	56ac699e-28d3-44c9-92fc-0071a60b160b	6	-	1	788,	0,	YA
chrI	1986514	1988013	6276908f-105b-4808-b5c8-8e4366dc8db7	6	-	1	1499,	0,	L1
chrI	1986514	1988148	df70a104-f13d-4f35-93bc-32c94c705c17	8	-	1	1634,	0,	YA
chrI	1986514	1986906	6a392a56-397c-45e7-83b6-7399101f97f3	9	-	1	392,	0,	YA
chrI	1986514	1987787	50e1cc5f-9ec7-443e-9ed9-73c4aa7e305b	8	-	1	1273,	0,	YA
chrI	1986547	1986936	95aca2ea-08b5-4a0b-b502-1ea3a4b0c8cc	9	-	1	389,	0,	YA
chrI	1986549	1986921	8afa888d-1131-483a-8d18-5c0441fd5495	8	-	1	372,	0,	EMB
chrI	1986567	1986972	3806f103-431d-4fc0-b959-bd8e7c9447ba	10	-	1	405,	0,	EMB
chrI	1986583	1987297	98181731-e4b5-4228-b4bc-57acf982584a	8	-	1	714,	0,	EMB
chrI	1986583	1986926	a25f7d13-14ba-40b8-9c7e-e150cec83607	10	-	1	343,	0,	EMB
chrI	1986584	1987651	dcd632e2-8007-4f1f-9640-aed252bdecc8	8	-	1	1067,	0,	EMB
chrI	1986588	1986911	380835a0-08ea-4fba-b224-6c20b1b7f04a	12	-	1	323,	0,	YA
chrI	1986601	1986919	258579b0-48d5-4f66-b070-91a6d7957d51	10	-	1	318,	0,	L1
chrI	1986624	1987297	f4e2e070-e01a-4ae4-aadd-e516e86d1776	8	-	1	673,	0,	EMB
chrI	1986651	1986923	3872d27d-f21a-4623-b818-8d8d8a1913c6	6	-	1	272,	0,	EMB
chrI	2002162	2002326	ea07338e-db28-4a1e-a86e-fe63c31a9bea	6	-	1	164,	0,	EMB
chrI	2033478	2033724	855b5c46-9c2e-41f2-9332-eb8d1737c23f	6	+	1	246,	0,	EMB
chrI	2033630	2034192	90375da6-4428-478a-8482-5465fa97f698	7	+	1	562,	0,	EMB
chrI	2033638	2034210	9ac6fc60-4275-43c3-8b1c-3de5280234a5	8	+	1	572,	0,	EMB
chrI	2033657	2034203	a55fe6b1-8e9d-40d2-820f-598bc424fcb7	9	+	1	546,	0,	L1
chrI	2033679	2034174	b4be41a9-8645-43ed-99fd-c73cbe450d46	8	+	1	495,	0,	EMB
chrI	2033715	2034211	306058b2-90be-4d13-8888-9dfec3de3c8f	10	+	1	496,	0,	EMB
chrI	2033738	2034128	15f14818-03ee-45ee-99dc-658cf4a70cfe	13	+	1	390,	0,	L1
chrI	2033752	2034148	ae73003c-8857-4c0b-9780-a7d3c1423b1c	10	+	1	396,	0,	L1
chrI	2033808	2034194	2f57a22a-cdf0-4794-9d7a-f0602cfbb9bb	6	+	1	386,	0,	EMB
chrI	2033832	2034193	24eb3630-0e9c-45c6-8f3e-40e9674334dc	12	+	1	361,	0,	L1
chrI	2033946	2034195	07947e3a-9625-406a-a5b9-e2a21836c877	10	+	1	249,	0,	L1
chrI	2036792	2036960	f1afa1ed-53ef-4808-a883-858b4c403dfe	6	+	1	168,	0,	EMB
chrI	2036935	2037169	188434e5-60ee-4394-a665-f90fea51862e	12	-	1	234,	0,	EMB
chrI	2050299	2050520	d8f70e19-0e8f-4e3e-aad5-a52e3b44d975	6	-	1	221,	0,	YA
chrI	2060249	2061205	eeb32e0d-f52a-4758-8157-bf65d8fc032c	9	+	1	956,	0,	L1
chrI	2060835	2061171	2f10657d-cca3-4aec-b7de-d2f5cced2adc	10	+	1	336,	0,	EMB
chrI	2070989	2071324	e852e012-d4cd-460f-93ec-5834a9976a58	6	+	1	335,	0,	EMB
chrI	2076677	2076872	0b93cfc1-21f0-432b-bd17-0091da8277cf	7	+	1	195,	0,	YA
chrI	2076698	2076925	2d1f644d-67b0-46be-b97e-4267739e0b1e	6	+	1	227,	0,	EMB
chrI	2076705	2076925	caa251d1-918d-4f3c-b8a5-529c3e0c1b19	7	+	1	220,	0,	YA
chrI	2076712	2076925	ea84537b-5c08-4aa9-bbb7-830912257d88	14	+	1	213,	0,	L1
chrI	2100318	2100612	0fba0698-758b-45f1-9e16-b331883279b8	8	+	1	294,	0,	EMB
chrI	2111378	2111601	fb147798-3552-4125-b4e5-f102c9b91f7f	12	+	1	223,	0,	L1
chrI	2122430	2123426	27176488-f72c-4477-8854-ea3e63f8464a	9	+	1	996,	0,	EMB
chrI	2123210	2123414	1bfb8220-64d2-4073-8651-f69936824154	10	+	1	204,	0,	YA
chrI	2123214	2123430	4ee6bc60-a69d-43f5-af7c-9929741c3d7f	10	+	1	216,	0,	EMB
chrI	2123220	2123433	6f3f5a4a-33fb-4745-8365-4aa48a5c3cf7	10	+	1	213,	0,	EMB
chrI	2128588	2128823	96609bda-72b0-4ed0-b8eb-e7ac9ad30e0f	8	+	1	235,	0,	L1
chrI	2142449	2143083	22fae5fc-299b-4857-8d3d-ea882d2ede4e	8	+	1	634,	0,	EMB
chrI	2144910	2145968	dde443d9-b766-4ce2-98d0-21557b855f50	6	+	3	73,96,282,	0,128,776,	YA
chrI	2144912	2159282	29d483dd-86e0-4caf-b109-5616672d193b	7	+	4	71,96,271,43,	0,126,774,14327,	L1
chrI	2144924	2145966	88b421be-4a63-44d9-a1e1-b42a582c6e0a	6	+	3	59,96,280,	0,114,762,	YA
chrI	2144924	2145969	cb0469d0-f8fb-4d42-8609-bdb0dcad1bec	6	+	3	59,96,283,	0,114,762,	YA
chrI	2144931	2145906	a4e7abf7-64f0-4f7a-9d38-1167aa15b5fe	6	+	3	52,96,220,	0,107,755,	YA
chrI	2145036	2145972	6c1ee239-79a4-45d9-86ec-3b4663a2b5d4	6	+	2	98,286,	0,650,	YA
chrI	2145037	2145953	ce258241-7f1d-4120-aca2-aa8046711638	5	+	2	97,267,	0,649,	EMB
chrI	2145037	2145969	5d55c274-d93e-402e-9ffc-0eb83f0b2c47	4	+	2	97,283,	0,649,	none
chrI	2145037	2145969	4417e9a1-7807-43b5-9c9c-dba7ce8e5f6a	6	+	2	97,283,	0,649,	YA
chrI	2145037	2145969	9237eff0-ca48-4214-80c3-bf1d97672955	11	+	2	97,283,	0,649,	YA
chrI	2145042	2145966	190ce61d-52ff-446a-a21c-266065ba8112	8	+	2	92,280,	0,644,	EMB
chrI	2145054	2145831	afbf0925-de28-4fa8-bf5b-8808d5588fb3	7	+	2	80,145,	0,632,	L1
chrI	2145083	2145968	96284560-1e8d-4afb-971d-8f5329c3a37a	6	+	2	51,282,	0,603,	none
chrI	2145102	2145939	b973c19a-26c7-4ba3-a5fc-86a4e898690d	8	+	1	837,	0,	L1
chrI	2145687	2145895	09baffd7-8036-464b-aeb2-0fdc6c178519	5	+	1	208,	0,	EMB
chrI	2145700	2145972	70d54a5c-3fd9-4174-824b-9846a93e491a	10	+	1	272,	0,	L1
chrI	2145703	2145972	7f461769-e1fa-4579-8875-e3a13a73b29d	8	+	1	269,	0,	EMB
chrI	2145703	2145949	fc802cb7-223d-4635-9856-b94d95017a21	10	+	1	246,	0,	L1
chrI	2145770	2145969	e75dbee3-ca3e-4a93-bfd7-ee4fbb808c48	8	+	1	199,	0,	YA
chrI	2150118	2153684	82d8989a-2d45-468d-938f-fbf0f807f705	12	-	3	167,284,536,	0,573,3030,	L1
chrI	2150464	2151782	bceaaa98-e771-49f9-8959-1bb85ddbb8f1	6	-	2	511,89,	0,1229,	EMB
chrI	2150691	2151782	f166b465-25c0-4bb4-ae96-9404d5b60e27	6	-	2	284,89,	0,1002,	EMB
chrI	2150700	2151749	d229731c-1c6b-4dfd-8d56-06947e01fc57	7	-	2	275,56,	0,993,	EMB
chrI	2150779	2151782	2282f5b3-9012-400d-ae0d-843f17cfb8ee	8	-	2	196,89,	0,914,	EMB
chrI	2152589	2152945	765da0b2-46d8-4f78-b1a3-71afcf3f2223	6	+	1	356,	0,	EMB
chrI	2152591	2153066	e83fd34f-d699-4b88-a880-da6c2601204a	8	+	1	475,	0,	EMB
chrI	2196892	2197272	f46b9a0b-c691-4ce5-a1a4-1aa960cc3538	8	-	1	380,	0,	EMB
chrI	2197074	2197766	008f41d9-49b1-44e7-a221-7623880af118	9	-	2	218,94,	0,598,	EMB
chrI	2202694	2203137	b8837669-a5f6-4a71-afb7-55d3bbef2feb	8	+	1	443,	0,	EMB
chrI	2203436	2203827	7e84934f-33e0-4938-acb8-d48fa8c180cd	12	-	1	391,	0,	L1
chrI	2207399	2207509	60cac6c8-ef62-4466-b6f9-b0e2b7382938	7	+	1	110,	0,	EMB
chrI	2209105	2209619	f8fbf89f-023a-4afc-bbff-c46b80e56434	10	+	1	514,	0,	EMB
chrI	2255929	2256212	12f9b31f-f05c-4a1e-8cef-5c9edc324838	10	-	1	283,	0,	EMB
chrI	2255941	2256247	5fbc9e34-e747-4864-a104-7467bd81c9b1	10	-	1	306,	0,	L1
chrI	2281502	2281723	55ffe7ef-7f72-413f-a338-5c06f2b97a62	4	-	1	221,	0,	YA
chrI	2281502	2281761	fa448026-ae6e-4c3f-b657-25de3c4591af	14	-	1	259,	0,	YA
chrI	2281514	2281812	a49eccbb-411a-4db8-88ec-4721a4dda9e8	8	-	1	298,	0,	EMB
chrI	2281620	2281813	2f8a45a3-609e-476b-b7a7-ed55a7d99c47	7	-	1	193,	0,	EMB
chrI	2297151	2297317	15b5286d-39af-4725-bfc2-1861a09cf556	8	+	1	166,	0,	EMB
chrI	2297413	2297540	2b6ecd1c-4250-4700-824a-fd1ea52b2a0c	8	-	1	127,	0,	EMB
chrI	2297470	2297808	0362ec39-8f56-42cf-97ec-386e92e05928	6	-	1	338,	0,	YA
chrI	2302771	2302975	c2710f26-4e1a-4c59-a01a-86dfa4457fb9	8	-	1	204,	0,	L1
chrI	2302783	2303101	587ba234-e3fc-4f10-bdc0-8aa1c3ad0193	10	-	2	191,75,	0,243,	EMB
chrI	2303158	2303314	e90bd946-bc0d-4154-b45d-8b7cfb4d9a4a	6	-	1	156,	0,	EMB
chrI	2303299	2303483	3fc7f97d-655d-4043-b14a-5fd550d36190	8	-	1	184,	0,	EMB
chrI	2303849	2304203	9643b4e3-6680-45a6-aa9d-5af0c57c909b	7	-	1	354,	0,	EMB
chrI	2311980	2312130	bacf0708-8247-44d5-b4c5-d3e192e8d497	10	+	1	150,	0,	YA
chrI	2311982	2312131	b466906b-8a13-4f40-926f-40990baa177b	8	+	1	149,	0,	YA
chrI	2349516	2349648	7df9efed-02aa-4141-bc5a-e268bb48a254	6	+	1	132,	0,	EMB
chrI	2350075	2350527	33a4d9ad-255b-4420-9219-58c0caa37ad8	6	+	1	452,	0,	EMB
chrI	2350101	2350428	b0d89fe6-8180-4968-9506-ba1ef70d3325	6	+	1	327,	0,	EMB
chrI	2350115	2350475	1b8a5542-7db3-4a86-9fdf-e74b38b82f20	8	+	1	360,	0,	EMB
chrI	2350173	2350526	76b0d221-f281-4a40-b673-ce1016a67f93	8	+	1	353,	0,	EMB
chrI	2356486	2356693	225c9449-ebbc-4ca2-a7e4-20516a067549	14	-	1	207,	0,	L1
chrI	2375099	2376362	fd092e47-95c6-452e-8d76-fbae1ecbdcc5	7	-	1	1263,	0,	L1
chrI	2375138	2375956	cbeb3867-a248-4b2b-a9a1-13bfb002ef1b	6	-	1	818,	0,	L1
chrI	2375141	2376305	7e6e8e21-f72b-4d64-b9e6-f48b1b601716	4	-	1	1164,	0,	EMB
chrI	2382951	2383217	c558cc69-781b-4054-8a8d-aea112138336	6	-	1	266,	0,	YA
chrI	2382954	2383404	069e66d9-dbfd-4675-9ffe-43aa0aaa8ada	8	-	1	450,	0,	EMB
chrI	2382954	2383224	b7e59878-4105-4541-bc84-67637912847a	9	-	1	270,	0,	L1
chrI	2382954	2383234	42f24de3-3772-427c-85fe-ebc189bcb4c9	13	-	1	280,	0,	L1
chrI	2382955	2383161	4ddd6ce5-ce05-41c3-8694-92d969a5768e	8	-	1	206,	0,	L1
chrI	2382967	2383312	877871b3-f3f7-43a4-a901-6c7e86547d03	6	-	1	345,	0,	EMB
chrI	2382987	2383363	d3738433-5f0d-4c3b-b08e-cade169deaf2	8	-	1	376,	0,	EMB
chrI	2382987	2383304	b8b696f6-a988-410b-877d-a806f1ca32ee	10	-	1	317,	0,	EMB
chrI	2383034	2383391	55b2c976-0b14-483c-ab9f-2364753ea50b	8	-	1	357,	0,	YA
chrI	2383205	2383442	79157f70-4115-4625-914e-8765aeb2fb5b	8	-	1	237,	0,	EMB
chrI	2394527	2394761	59545607-ee01-43fa-a63f-e657db927637	8	-	1	234,	0,	L1
chrI	2395008	2395609	27c0a279-1e36-419f-967c-50565093a36b	8	-	1	601,	0,	YA
chrI	2403207	2403536	0774e3f5-37f4-4775-b773-d2ed49f4db56	8	+	2	88,192,	0,137,	EMB
chrI	2403962	2404120	1be4dfdd-7c9e-4b35-9106-3863bf1741a8	10	+	1	158,	0,	YA
chrI	2466570	2467006	2bb40efa-a2ba-4a2c-90c7-b3b50bbd4e78	8	-	1	436,	0,	EMB
chrI	2468013	2468627	2f04d433-d255-4deb-ab8b-ac273362f585	8	-	1	614,	0,	L1
chrI	2468132	2468635	653152ca-a642-4465-aea5-be313c317b61	10	-	1	503,	0,	L1
chrI	2468142	2468810	81e269ea-6b74-4235-bd83-2cae343dd653	8	-	1	668,	0,	YA
chrI	2468143	2468729	2bb6ed0d-12fc-4057-8b5e-b4cdb378e7f0	12	-	1	586,	0,	YA
chrI	2470852	2471002	f481a034-1b9a-4bc6-9a00-d11e10788ee4	6	-	1	150,	0,	L1
chrI	2472037	2472489	efa65869-9811-4e16-adf0-cbeb70a52d60	4	-	1	452,	0,	none
chrI	2472059	2472350	0b9212c3-edf6-4e13-8846-9646807c28bc	8	-	1	291,	0,	EMB
chrI	2484925	2485393	29a3c1f0-eaae-4465-9bd8-c7c57760aa83	6	-	2	350,71,	0,397,	EMB
chrI	2489562	2489746	be0696e2-7790-47b4-81d9-9256c074f790	10	+	1	184,	0,	L1
chrI	2489601	2489780	1729156d-67a4-45a5-9067-3caabcf658f8	6	+	1	179,	0,	YA
chrI	2489608	2489785	27d30d56-fef1-47f5-ba6d-fb2d9a596c18	6	+	1	177,	0,	YA
chrI	2505662	2505950	2a0232ae-1916-49ee-8912-b033c01cd923	12	+	1	288,	0,	YA
chrI	2505830	2506114	100b9b99-eaac-469a-86b5-fa725a37cff9	11	+	1	284,	0,	L1
chrI	2505846	2506235	12c5abd2-bea6-40e7-bea6-f51af8d14f5c	8	+	1	389,	0,	YA
chrI	2505849	2506232	4aadb76a-9ff8-404c-99da-91fdc8b66b59	8	+	1	383,	0,	EMB
chrI	2505897	2506252	79f0f325-cd56-4d63-a55b-c274ce2f82d7	8	+	1	355,	0,	YA
chrI	2505914	2506135	79946869-6c57-4dd9-973e-289cc686625d	12	+	1	221,	0,	L1
chrI	2505922	2506252	731fcc22-734c-44f3-8e6a-690cae1323b0	10	+	1	330,	0,	YA
chrI	2505927	2506238	3df15c70-e2b1-4a4e-b252-b4c56291ae04	10	+	1	311,	0,	L1
chrI	2505936	2506243	8409c274-f0d5-4890-b404-25aa9559f289	6	+	1	307,	0,	EMB
chrI	2505943	2506228	a8e5ca2f-525b-48be-b223-277d8c54c7bd	10	+	1	285,	0,	EMB
chrI	2505959	2506250	a155d861-2fca-4b59-8203-704a32413afb	8	+	1	291,	0,	YA
chrI	2505980	2506234	3ed88f3b-e187-4a13-a5d3-a9ef44f803dd	8	+	1	254,	0,	YA
chrI	2505989	2506252	bdd957ec-081e-4be3-9405-e03a63af1c9e	10	+	1	263,	0,	YA
chrI	2506248	2506648	820c4b13-bb94-4522-b716-07cf0e2dddaf	8	-	2	231,80,	0,320,	EMB
chrI	2506843	2507026	ef2ac2f8-88ed-48c1-a58a-bac2d4c89d19	8	-	1	183,	0,	L1
chrI	2506869	2507027	9f4f2b09-da73-439d-be57-39da443b1319	6	-	1	158,	0,	YA
chrI	2541744	2542112	87001319-1b2e-40da-af2e-6122f2fad32f	8	+	1	368,	0,	L1
chrI	2541744	2542123	aceab028-cbfc-4991-811b-ac22a8b6cdf2	10	+	1	379,	0,	L1
chrI	2546679	2546906	47255650-6996-4631-b8ce-581d8f694fe4	6	-	1	227,	0,	EMB
chrI	2546685	2546939	5e7199a3-7e39-4fa3-98cc-cc2dbf4d1ccf	6	-	1	254,	0,	EMB
chrI	2581025	2581257	24f38976-db89-42b4-bc08-ce6c67611e17	8	-	1	232,	0,	EMB
chrI	2581025	2581254	66c1d5fb-6f3c-4d4f-b681-c6899f6877c8	9	-	1	229,	0,	YA
chrI	2581026	2581229	2e43c58e-13c3-43b0-875d-dadc62469acf	7	-	1	203,	0,	YA
chrI	2585931	2586126	dfcd95bd-07f2-4b6b-9904-ea8693df3725	6	-	1	195,	0,	YA
chrI	2586006	2586123	3505b0a2-0a75-4c49-b149-5d852ca2130d	7	-	1	117,	0,	YA
chrI	2589064	2589268	b4d7aa4b-1224-48cb-9b95-013583218c38	8	-	1	204,	0,	L1
chrI	2617114	2617357	e54219b1-6c64-4b6e-9664-f54f32ca53a8	8	+	1	243,	0,	EMB
chrI	2623176	2623425	82ebc9da-b5a9-49e8-a472-4b9c4bf3922c	8	-	1	249,	0,	none
chrI	2623643	2623889	eef9a3dc-d2d0-4d00-8a61-75d4510c52f2	10	-	1	246,	0,	L1
chrI	2623643	2623849	3ecfc396-c676-42c5-acac-077ec7e97cbe	6	-	1	206,	0,	YA
chrI	2639988	2640276	60b3070e-4602-45d3-b40c-317ca0ac7d5a	7	-	1	288,	0,	EMB
chrI	2639989	2642327	8fc5b05d-f5f8-46b0-adb3-3b050a86a48f	8	-	4	333,171,172,68,	0,384,605,2270,	EMB
chrI	2639990	2642445	b0cf59ee-5381-441f-865b-daef8c8abf8b	6	-	4	332,171,172,186,	0,383,604,2269,	EMB
chrI	2639991	2642447	80dbbd6a-0b9d-4f18-b886-cac403d1fef6	7	-	4	331,171,172,188,	0,382,603,2268,	EMB
chrI	2639991	2640325	998415d2-ed6d-407a-bdac-4612bf644974	11	-	1	334,	0,	L1
chrI	2639993	2642373	7fde2a17-0f3b-44c9-bec3-00bd5a2feed9	6	-	4	329,171,172,114,	0,380,601,2266,	L1
chrI	2639993	2642327	407cbf0f-9e30-44f3-bff1-4506c36739eb	6	-	4	329,171,172,68,	0,380,601,2266,	YA
chrI	2639994	2642342	d255d0ff-d54b-4602-a29c-d7c5fb0e4552	6	-	4	328,171,172,83,	0,379,600,2265,	EMB
chrI	2639994	2640751	64afbb89-b42c-4719-9d39-5b70847bda7f	7	-	3	328,171,157,	0,379,600,	L1
chrI	2639994	2642372	b0a66eab-a101-4d66-9c59-85c530391023	9	-	4	328,171,172,113,	0,379,600,2265,	L1
chrI	2639994	2642347	24108e96-114b-481c-a99c-89810cdac322	10	-	4	328,171,172,88,	0,379,600,2265,	YA
chrI	2639995	2642325	ae59d90e-22a0-442a-84db-516e031b4e31	7	-	4	327,171,172,66,	0,378,599,2264,	YA
chrI	2639996	2642399	5396d8d7-9a2d-4935-b806-5eefa6a72aff	12	-	4	326,171,172,140,	0,377,598,2263,	EMB
chrI	2639998	2642444	fcf47a02-da5e-4384-9250-ab2c32f72df1	10	-	4	324,171,172,185,	0,375,596,2261,	L1
chrI	2639998	2642404	af08efbd-2ed6-4371-b20b-881d4c406741	12	-	4	324,171,172,145,	0,375,596,2261,	YA
chrI	2640000	2642327	262395dc-84fb-4b0b-8d73-233c81b242b5	6	-	4	322,171,172,68,	0,373,594,2259,	EMB
chrI	2640000	2640763	228ce6b6-0700-4de2-a351-3ce788b204b3	8	-	3	322,171,169,	0,373,594,	YA
chrI	2640000	2642373	0e5df966-4975-4f34-936a-60bbad3e9cad	8	-	4	322,171,172,114,	0,373,594,2259,	YA
chrI	2640000	2642327	ea5f414f-19eb-4416-ab45-a243f85aecfd	8	-	4	322,171,172,68,	0,373,594,2259,	YA
chrI	2640002	2642437	562be3fa-5097-406c-acd7-9f264955dd6a	6	-	4	320,171,172,178,	0,371,592,2257,	EMB
chrI	2640003	2642397	50efe488-2e11-4406-95cf-919ba7ce4691	12	-	4	319,171,172,138,	0,370,591,2256,	YA
chrI	2640005	2642327	0fec4c24-b17a-4ec6-a463-b1be3531c7f4	6	-	4	317,178,172,68,	0,361,589,2254,	YA
chrI	2640009	2642323	b22b92d2-5c2d-4fce-bd7c-72974251dac7	11	-	4	313,171,179,64,	0,364,578,2250,	L1
chrI	2640009	2642281	42bfdb85-5220-4cda-a4b6-cf052a669ad1	12	-	4	313,171,172,22,	0,364,585,2250,	YA
chrI	2640022	2640765	eab3e24b-dd1e-45af-bf1a-4e05aa8ee2f4	10	-	3	300,171,171,	0,351,572,	EMB
chrI	2640026	2642361	c4598d70-31ed-4e81-b44f-1cd14bc8ea7c	10	-	4	296,171,172,102,	0,347,568,2233,	EMB
chrI	2640031	2642327	477f92f0-2d61-47da-8c56-c72dbd7f6269	6	-	4	291,175,172,68,	0,338,563,2228,	YA
chrI	2640083	2640325	97e72681-f6af-4909-bed2-8ad4f85aa8af	10	-	1	242,	0,	L1
chrI	2640152	2642314	9dee55b6-1489-4d40-a3d6-50bf93907364	10	-	4	170,171,179,55,	0,221,435,2107,	L1
chrI	2640169	2640500	aa0d4e5c-6945-48d8-a527-977cfbc48906	10	-	2	153,127,	0,204,	EMB
chrI	2640195	2642431	bcdce727-faf6-4d31-8928-65f29698ece5	6	-	4	127,171,172,172,	0,178,399,2064,	EMB
chrI	2640243	2642327	bfcfce07-c1e3-4bc6-b1d1-fb0a9d8a6a43	6	-	4	71,178,172,68,	0,123,351,2016,	YA
chrI	2672960	2673190	efa6a98f-ef64-4e15-a308-aca69ad28f3a	11	-	1	230,	0,	L1
chrI	2689302	2689426	7046c39f-3893-4ea0-977c-1cfb9cdc3ccb	8	-	1	124,	0,	EMB
chrI	2714161	2714397	7b738c0b-e82e-406f-a1ce-56a8e9335ac1	6	+	1	236,	0,	EMB
chrI	2714890	2715054	7d74a6d8-a7ff-4528-95ab-ea46ef43b66b	6	+	1	164,	0,	EMB
chrI	2721585	2722079	e06d7da8-b01b-45ca-9fa6-e98843ac205b	8	-	1	494,	0,	EMB
chrI	2721585	2721965	d376305f-3e63-42a1-9bc8-105c2a85f4eb	8	-	1	380,	0,	EMB
chrI	2721585	2722118	a67419f3-a09c-4477-9c0d-346846c62018	9	-	1	533,	0,	YA
chrI	2721585	2722115	587534ad-1420-4c5f-a1bf-4c065ce341bf	9	-	2	316,90,	0,440,	YA
chrI	2721585	2721994	6992768e-d263-45fb-bbd7-21478c985413	8	-	1	409,	0,	YA
chrI	2721585	2721959	fb7c4e5f-3541-4ca2-9681-1811ace59595	10	-	1	374,	0,	YA
chrI	2721585	2721993	97577541-2b4e-4c35-a143-65bb130417f9	8	-	1	408,	0,	YA
chrI	2721593	2721824	29915011-c65c-46e8-bf1f-2a0be81151da	8	-	1	231,	0,	YA
chrI	2721593	2721938	c4222ce1-8392-42b2-bca7-9384e49b5d72	6	-	1	345,	0,	YA
chrI	2721593	2722109	4eec3189-7f84-4642-b6e9-ee7e015dbda0	8	-	1	516,	0,	YA
chrI	2721594	2722021	3c13c143-b62b-4c63-9af8-6cecf59a3846	8	-	1	427,	0,	YA
chrI	2721594	2721988	42fa274f-6709-4980-80d8-37f1ed35df29	10	-	1	394,	0,	YA
chrI	2721595	2722095	54a66530-8076-4a35-95bc-4b4b994a5d7b	9	-	1	500,	0,	YA
chrI	2721601	2721805	70c3d841-a99e-41a6-badd-9de26d771133	12	-	1	204,	0,	YA
chrI	2755386	2755668	f76e0e7a-cb41-45dc-ac5b-608604547ca4	7	-	1	282,	0,	L1
chrI	2775390	2776104	9d35da25-e73c-46c9-b1be-829633101cc1	10	-	4	176,88,134,160,	0,223,370,554,	EMB
chrI	2815541	2815790	bb0a5606-b4d4-4a2d-b148-53c3551db1ac	8	+	1	249,	0,	EMB
chrI	2822241	2822509	d0b9c7a9-0a7c-4c66-aab5-86b46b9ff2e0	6	-	1	268,	0,	EMB
chrI	2822241	2822509	00682deb-ab33-46fc-92e7-06d54d19cb64	9	-	1	268,	0,	EMB
chrI	2822241	2822462	65c15881-0bf2-43eb-a3f2-d0bd34633881	8	-	1	221,	0,	EMB
chrI	2822799	2823602	b13d35c8-6f70-4b3b-88d8-6f1fa9733358	8	-	1	803,	0,	EMB
chrI	2870136	2870347	be23d3ae-6e24-4557-8f0e-f41147db4fb2	9	-	1	211,	0,	EMB
chrI	2870138	2870633	0de2fb78-5a3c-4c92-a06a-79b4d8dced3b	6	-	1	495,	0,	YA
chrI	2870138	2870315	b4c1df1d-dff7-4f20-b4d4-9d61a3aa92a4	10	-	1	177,	0,	YA
chrI	2870139	2870446	7270536a-04d1-4b61-90f9-d078719ee287	6	-	1	307,	0,	YA
chrI	2870139	2870456	d401969a-e845-41b8-a0df-b14de965830b	9	-	1	317,	0,	YA
chrI	2870140	2870552	29435d96-0cad-410f-b781-0177583d215a	6	-	1	412,	0,	EMB
chrI	2870140	2870415	6ec3b919-84a9-4dd6-889f-ca0fcb6b632a	7	-	1	275,	0,	EMB
chrI	2870140	2870633	88fafddc-dd34-4808-ad74-d91c70f74b7b	8	-	1	493,	0,	EMB
chrI	2870140	2870453	5e949bbd-6034-4e07-a013-4b6bcb67cd60	6	-	1	313,	0,	EMB
chrI	2870140	2870510	9e11366d-bad9-4c41-95d5-97cadca090e1	14	-	1	370,	0,	L1
chrI	2870140	2870633	c173209f-d32a-436c-8ab6-fbd9b856ba3a	9	-	1	493,	0,	YA
chrI	2870140	2870411	d5f6e0c6-c726-476b-83c1-8e2111cd5de4	8	-	1	271,	0,	YA
chrI	2870140	2870466	f3905715-af71-442d-8e4a-f96d88e90158	4	-	1	326,	0,	YA
chrI	2870140	2870597	65cb9181-a478-4a85-a718-b67bf4a2633a	8	-	1	457,	0,	YA
chrI	2870140	2870633	39164328-5daa-4bcb-8705-9224ed4bb39a	6	-	1	493,	0,	YA
chrI	2870140	2870406	d52a18e9-efd4-4170-b88e-bd9af75af96d	10	-	1	266,	0,	YA
chrI	2870143	2870614	d1db7c2a-08b7-4a33-8880-5d1c7f228220	10	-	1	471,	0,	YA
chrI	2870147	2870392	57fa5cf3-4260-4347-8e90-d407c999b1e0	9	-	1	245,	0,	YA
chrI	2870149	2870595	f1951916-5745-4d2d-846f-4b459cc80052	6	-	1	446,	0,	YA
chrI	2870151	2870634	6f0ba4c8-6d0b-49b5-a744-0beb71de157e	6	-	1	483,	0,	YA
chrI	2870155	2870505	12eee1e7-6e0d-4407-880e-930012829d41	11	-	1	350,	0,	YA
chrI	2870155	2870633	e7e8fa73-5a97-48e8-8de2-5f7f1a21b4be	5	-	1	478,	0,	YA
chrI	2870156	2870347	c5dbe5ba-ae76-4aac-865a-c5e69ef7ca95	9	-	1	191,	0,	EMB
chrI	2870170	2870520	645f53ae-92ce-4deb-9c64-48fc886df47d	7	-	1	350,	0,	YA
chrI	2870182	2870509	3252a109-5e90-488d-87d4-80161f027bdd	9	-	1	327,	0,	YA
chrI	2870182	2870633	1261beb2-b73e-4aa8-8178-e2c4e1153f0e	9	-	1	451,	0,	YA
chrI	2870182	2870633	17405bda-b918-4b3f-b34f-d435929db30e	10	-	1	451,	0,	YA
chrI	2870184	2870447	b2b1a051-9fe3-44de-8b39-38ee399189fc	9	-	1	263,	0,	L1
chrI	2870225	2870596	f2c241f7-4980-402c-89a8-87487c45e6c3	6	-	1	371,	0,	EMB
chrI	2880873	2880998	03eb8cf1-5e6a-4373-80de-d92772c63c7e	8	-	1	125,	0,	YA
chrI	2883542	2883809	8cc9d518-c3b5-4914-b9d6-4c5236638aa7	4	-	1	267,	0,	EMB
chrI	2883544	2883837	146230d9-6ff0-4846-9f15-8b235bd45081	8	-	1	293,	0,	EMB
chrI	2883552	2883914	cc9bc774-472b-42fe-ab93-aa59954ca94b	6	-	1	362,	0,	YA
chrI	2883556	2883956	c4ba1146-2622-48f3-97ab-533397680fa9	8	-	1	400,	0,	EMB
chrI	2883566	2883959	afb2f71c-144e-4697-b6df-e48056f26dd0	8	-	1	393,	0,	L1
chrI	2883567	2883824	900149cc-8628-48fc-b327-ab7e8b9be605	6	-	1	257,	0,	EMB
chrI	2883623	2883956	7202d635-1474-4861-8848-db297ac42b62	6	-	1	333,	0,	EMB
chrI	2885744	2886076	a62ed1c2-db5e-446c-8558-b78425efd079	6	-	1	332,	0,	EMB
chrI	2885745	2885993	08ae94be-0c51-42d4-be83-9787ceb5bc15	6	-	1	248,	0,	EMB
chrI	2885779	2886141	b1eed5c3-3429-4a03-b609-a02d5d0731ae	8	-	1	362,	0,	L1
chrI	2887407	2887699	892ebe71-0264-4be5-8bcc-8969e78b02e9	10	+	1	292,	0,	EMB
chrI	2887420	2887676	99e97cf9-94b0-4ace-8b2c-4670b5b61ca2	10	+	1	256,	0,	EMB
chrI	2887420	2887637	b21a7e55-3566-49a9-a250-14fbf1b9d86d	12	+	1	217,	0,	EMB
chrI	2887420	2887699	b36ddcdc-9293-4deb-bc3e-f42b1cbc4860	8	+	1	279,	0,	EMB
chrI	2887422	2887693	71383133-8f90-40cb-8b58-b1796957e5f5	6	+	1	271,	0,	EMB
chrI	2887429	2887699	55376deb-2e84-4461-bdee-05124827fdca	9	+	1	270,	0,	EMB
chrI	2887434	2887617	72484644-ce83-48f3-9658-4d4d2cb9d544	8	+	1	183,	0,	EMB
chrI	2887441	2887699	1cb2a1b3-14ac-44f0-9779-6375a143a3f3	6	+	1	258,	0,	EMB
chrI	2887444	2887674	3c789549-a7ca-48c7-a4dc-5f18bfd03b8c	8	+	1	230,	0,	L1
chrI	2887445	2887699	7bf67bf4-7b54-4e2e-bdf6-b7304633d78f	8	+	1	254,	0,	EMB
chrI	2887447	2887608	29de2743-aa0b-4e11-b8bb-51a2b53232e0	8	+	1	161,	0,	EMB
chrI	2887448	2887713	011977d8-c5a6-4bf1-ae4d-332c0edac437	7	+	1	265,	0,	EMB
chrI	2887451	2887697	fc43c9f3-9ff3-40b6-8521-79ec0b45694d	8	+	1	246,	0,	L1
chrI	2887452	2887702	d2ea5dea-b23b-418e-8216-681774a56a70	6	+	1	250,	0,	EMB
chrI	2887459	2887695	33e44f72-40ce-4774-9528-9072a1a40244	7	+	1	236,	0,	EMB
chrI	2887486	2887699	96ecb221-e22d-4a49-9cf5-735aa9030fd1	8	+	1	213,	0,	EMB
chrI	2887494	2887699	94bb8805-cb05-4f88-bbe0-87dfa3ea51e1	8	+	1	205,	0,	EMB
chrI	2889874	2890240	a605c249-da4b-479d-922e-ebc9b02d0696	7	+	1	366,	0,	EMB
chrI	2889893	2890383	aa35742d-e052-4a41-93de-ac6abf63646b	6	+	1	490,	0,	EMB
chrI	2889901	2890347	5de03bad-e8b9-4c45-a095-2d7a43cb5674	6	+	1	446,	0,	EMB
chrI	2893446	2893719	0415587d-ec41-4b3b-b160-2cb01c0a88de	6	-	2	110,109,	0,164,	EMB
chrI	2894917	2895114	8a1127c8-c125-468c-a00e-1cc6150c3aaf	10	-	1	197,	0,	L1
chrI	2894929	2895202	78f7503f-f205-4ffd-a562-ce27c923ecbd	10	-	2	109,112,	0,161,	L1
chrI	2894936	2895206	bd23b9e6-1f50-4ce8-a513-06f1d44512d0	8	-	1	270,	0,	EMB
chrI	2895329	2895512	b0fdbdfe-f288-4b8b-a9c5-27b7dc7e17ae	10	-	1	183,	0,	YA
chrI	2895330	2895502	a15b4595-70ca-4127-8a0d-bc31b2d62a31	8	-	1	172,	0,	L1
chrI	2895330	2895597	0b3feff2-a7f9-4d34-afed-3233c16fcc6a	8	-	1	267,	0,	L1
chrI	2895331	2895595	e84a150d-6037-4278-b615-af83d0902132	8	-	1	264,	0,	YA
chrI	2895417	2895641	3a3fd016-d01a-41ad-80c6-f98cb86e5e67	8	-	1	224,	0,	YA
chrI	2939476	2939746	2f527f42-f225-47dc-bd35-28103a87f027	8	-	1	270,	0,	L1
chrI	2939477	2939746	99f69392-713a-4944-b7fe-127d23958488	9	-	1	269,	0,	L1
chrI	2939477	2939746	f7ee28e2-efc6-49cf-8900-de67dff9f54f	7	-	1	269,	0,	L1
chrI	2944271	2944532	8077efe1-38ba-4038-81a8-452ec6c30fe3	8	+	1	261,	0,	EMB
chrI	2946743	2947101	c784e6ff-f65c-437b-bdf8-c31e86a84b5f	4	+	1	358,	0,	EMB
chrI	2946743	2947107	5edfcf2e-adaa-4d8f-a129-4620c2583887	8	+	1	364,	0,	YA
chrI	2946799	2947095	3925ebea-70ff-4d4d-862e-1ee0a929ef86	6	+	1	296,	0,	EMB
chrI	2986112	2986432	ab5f422c-348f-411a-86a3-e7165d79fb73	10	-	1	320,	0,	EMB
chrI	2986139	2986353	22d763db-82f8-4361-80df-2ff66025baca	12	-	1	214,	0,	L1
chrI	2986149	2986372	3893d3d4-62c9-4a85-95ee-b9e79a237326	4	-	1	223,	0,	L1
chrI	3001180	3001372	eff3ff26-8f7f-470f-8fff-c5b3f9d89fb4	6	+	1	192,	0,	YA
chrI	3005530	3005908	73c4b475-215b-4a3d-8c99-f32524388712	11	-	1	378,	0,	EMB
chrI	3005532	3005933	48bf096c-176c-4e58-9081-bc3dfe9eabfc	6	+	1	401,	0,	EMB
chrI	3005532	3005905	39f0dd0e-3d3a-4d41-bfd9-ef0a4d4dfdf0	8	+	1	373,	0,	EMB
chrI	3005532	3005898	027526da-9951-4942-8324-b87f91b3fa73	8	+	1	366,	0,	EMB
chrI	3005532	3005760	08c78484-ecbc-4674-aa0d-37c2df89717a	10	+	1	228,	0,	EMB
chrI	3005532	3005898	a6be4006-88dc-4359-a3e6-78d0691441d6	6	+	1	366,	0,	YA
chrI	3005559	3005940	aedc3157-cd6c-4130-8d22-c050e592eb45	10	+	1	381,	0,	L1
chrI	3005572	3005932	7d63bce3-871b-4e29-bf41-b12d0dabc17c	10	+	1	360,	0,	EMB
chrI	3005748	3005943	aeca3c63-b08e-4f3e-87ea-22946e196d2d	6	+	1	195,	0,	YA
chrI	3021329	3021524	5eca0a9c-bd53-4082-8d66-edf341066c2f	10	+	1	195,	0,	none
chrI	3021330	3021531	4b00830e-92d2-42ba-a63c-eddfd53ee2e9	6	+	1	201,	0,	YA
chrI	3021366	3021533	81a10241-2400-4c36-9ad5-717c894db4d0	10	+	1	167,	0,	EMB
chrI	3021652	3021778	c39b6fde-13a5-4a49-b787-8c424154e574	6	+	1	126,	0,	YA
chrI	3028128	3028397	8043c846-cf90-49be-b885-c8afe262a76b	8	+	1	269,	0,	EMB
chrI	3028128	3028396	b0acc2e0-9e3e-44ee-bd6e-d4736eec2716	6	+	1	268,	0,	YA
chrI	3034722	3035093	9cf37e64-1865-418a-910e-2fd955ea121c	14	-	1	371,	0,	L1
chrI	3034744	3035326	f84c77d8-83dc-4084-9127-029b4037d4ca	11	-	1	582,	0,	L1
chrI	3034750	3035293	31adb069-f49b-4a9a-a223-b7726bed2930	9	-	1	543,	0,	L1
chrI	3034751	3035225	3c56c152-c9af-4b95-bc2e-8e4514038a8f	8	-	1	474,	0,	YA
chrI	3034790	3035242	41e150bf-df06-49cd-a4a0-4fd0dc9777de	6	-	1	452,	0,	YA
chrI	3036028	3036205	715fa4b7-7aa3-4b0c-b9e4-d37199027a9c	6	+	1	177,	0,	EMB
chrI	3037119	3037732	1f2b4c59-70ad-4d9a-a448-ee1c4bcc41f1	7	+	2	212,351,	0,262,	YA
chrI	3037123	3037735	9d09871a-0e32-4b87-8939-f90177fcd39e	10	+	2	208,365,	0,247,	YA
chrI	3037124	3037732	7c69ee75-dc2f-48c2-b985-730cde0e3ce7	10	+	2	207,351,	0,257,	YA
chrI	3037126	3037735	79da81a7-5ff2-4efd-acc5-177ae221425e	8	+	2	205,354,	0,255,	YA
chrI	3037159	3037685	5bdc687e-d37a-4ef3-a620-9ace32122be3	13	+	2	172,304,	0,222,	L1
chrI	3037162	3037553	bdf55223-e5db-437e-befc-6258f8f7f2b2	8	+	2	169,172,	0,219,	L1
chrI	3038589	3038824	c6505c48-e38c-4e73-9a85-b72e06f64276	12	-	2	91,88,	0,147,	L1
chrI	3055316	3055598	8298f6b2-e851-4737-bd14-fdcfcb03af26	6	-	1	282,	0,	YA
chrI	3070967	3071246	50d3f2be-6041-4084-b629-38c521b7c2ed	11	-	1	279,	0,	L1
chrI	3070968	3071342	234fa859-989d-47ee-92cc-906590004ad8	8	-	1	374,	0,	EMB
chrI	3070969	3071517	efec62ba-3778-4405-82dc-59b24e681a18	8	-	1	548,	0,	EMB
chrI	3070974	3071417	727b43e7-b1c5-4c25-a8d5-e434155067e5	8	-	1	443,	0,	YA
chrI	3070974	3071333	4823477b-8091-4f45-90c5-3c7d056e6ba9	6	-	1	359,	0,	YA
chrI	3070976	3071290	7cd3391e-6916-49f8-abbd-03782916eebc	6	-	1	314,	0,	EMB
chrI	3070980	3071383	05aff3b3-a631-46d6-9309-d72013730fe4	12	-	1	403,	0,	none
chrI	3070980	3071325	f5fc6c8a-f2aa-4349-8843-5931f14c57d6	9	-	1	345,	0,	L1
chrI	3070980	3071416	b3b3f3f0-169d-42a1-af7f-87cea7fc9fcc	6	-	1	436,	0,	YA
chrI	3070990	3071192	00e05053-7d21-4fd5-a6c0-fb56bdcd1293	8	-	1	202,	0,	YA
chrI	3071006	3071402	8d3b6f09-77ce-41e2-b3e9-dfe3567a6fd7	4	-	1	396,	0,	YA
chrI	3071132	3071522	5399837f-a1c0-42df-936f-1edffcecd153	8	-	1	390,	0,	EMB
chrI	3090406	3091589	c3ffc875-0a5e-4d79-8592-c196acb5cdaa	8	-	1	1183,	0,	EMB
chrI	3091267	3096033	ad058e09-3159-4202-a105-fb7e399cc41f	14	-	4	547,83,72,93,	0,1404,3872,4673,	L1
chrI	3091267	3095062	7d588605-9f29-4867-826e-1d66e6ff8109	14	-	5	547,212,208,203,90,	0,1404,2335,2964,3705,	L1
chrI	3091272	3096250	a9280b99-a26a-4985-b342-aa213d36e1b0	8	-	8	542,212,208,203,86,72,93,159,	0,1399,2330,2959,3700,3867,4668,4819,	EMB
chrI	3091274	3096216	99195a77-2c9c-47ed-bf5b-0a16c975e4c6	9	-	8	540,208,210,203,86,72,93,125,	0,1397,2326,2957,3698,3865,4666,4817,	EMB
chrI	3091277	3096220	7d0d7bcc-9779-4e75-bdba-324134da1cdc	15	-	8	537,212,208,203,86,72,93,129,	0,1394,2325,2954,3695,3862,4663,4814,	L1
chrI	3091285	3096204	6c96ef89-26c3-4a1d-8717-a65326feb81b	8	-	8	529,212,210,203,86,72,93,113,	0,1386,2315,2946,3687,3854,4655,4806,	YA
chrI	3091301	3095986	cdf08a73-3248-4f57-ad6e-ee437b4b5329	14	-	4	513,212,138,46,	0,1370,2301,4639,	L1
chrI	3091477	3096224	0129b6fb-cff1-4557-a9b4-10a6aad7c4a1	10	-	8	337,212,208,203,86,72,93,133,	0,1194,2125,2754,3495,3662,4463,4614,	YA
chrI	3091521	3096225	1fdb9fd4-874f-4037-9d6b-1157784bee62	10	-	8	293,212,210,203,86,76,93,134,	0,1150,2079,2710,3451,3614,4419,4570,	YA
chrI	3091522	3096188	e38276a7-c2e7-4188-bb59-9a50b385a15a	8	-	8	292,212,208,203,86,72,93,97,	0,1149,2080,2709,3450,3617,4418,4569,	EMB
chrI	3091526	3096220	26621310-ac92-42a6-ab9c-29fc29722da1	8	-	8	288,212,208,194,86,72,93,133,	0,1145,2076,2714,3446,3613,4414,4561,	none
chrI	3091548	3096225	cee659f4-54c7-49b4-b75e-deb40b825b24	12	-	8	266,212,208,203,86,72,93,134,	0,1123,2054,2683,3424,3591,4392,4543,	YA
chrI	3091564	3096224	edbbc3d7-68a3-4936-8d3b-f5354e3f599e	10	-	8	250,212,208,203,86,72,93,133,	0,1107,2038,2667,3408,3575,4376,4527,	EMB
chrI	3091605	3096204	33cacc63-2bdd-432a-b897-76a9bc4d3705	10	-	8	209,212,208,203,86,72,93,113,	0,1066,1997,2626,3367,3534,4335,4486,	EMB
chrI	3091619	3092875	407bce02-c921-4027-bf90-c3006855bfb3	6	-	2	195,204,	0,1052,	EMB
chrI	3091633	3096220	a05d1a89-da66-4ccb-b255-f67dc5f83042	10	-	8	181,212,208,203,86,72,93,129,	0,1038,1969,2598,3339,3506,4307,4458,	EMB
chrI	3091634	3096225	83d77513-2217-4620-b373-6ecbbf75d9a9	12	-	8	180,212,208,203,86,72,93,134,	0,1037,1968,2597,3338,3505,4306,4457,	EMB
chrI	3091708	3096215	d6e28ac5-3549-42c9-9306-a9f7c48ef7be	13	-	8	106,212,208,203,86,72,93,124,	0,963,1894,2523,3264,3431,4232,4383,	EMB
chrI	3091714	3096217	cf0ca98d-a607-40d0-a9e3-ddbb81353610	6	-	8	100,215,208,203,86,72,93,126,	0,957,1888,2517,3258,3425,4226,4377,	EMB
chrI	3092675	3096224	64e3936a-979d-403b-8e50-5f7362df2c4c	8	-	7	208,208,203,86,72,93,133,	0,927,1556,2297,2464,3265,3416,	EMB
chrI	3092737	3093072	71d83a2d-4c0e-4c8b-a9da-f5b85b41537a	6	+	1	335,	0,	EMB
chrI	3092816	3096225	498565a8-9ea2-4a2b-a31c-0936aa2bb5af	11	-	7	67,208,203,86,72,93,134,	0,786,1415,2156,2323,3124,3275,	EMB
chrI	3093599	3096219	f2b47fbc-8eab-4683-b932-496d27ff4534	15	-	6	211,203,86,72,93,128,	0,632,1373,1540,2341,2492,	L1
chrI	3093623	3096217	df6c1f9f-c7f7-48f3-8064-c53d3a56cd42	10	-	6	187,203,86,72,93,126,	0,608,1349,1516,2317,2468,	EMB
chrI	3094233	3096258	aaaedb58-4d58-45ea-8296-52c5059bcb73	10	-	5	201,86,72,93,167,	0,739,906,1707,1858,	EMB
chrI	3094346	3109530	e5b3831b-20c9-4598-9457-a7905cf353c7	8	+	9	60,150,75,196,159,123,107,56,257,	0,10016,11811,13171,13508,13855,14162,14321,14927,	YA
chrI	3094371	3108615	b28eae95-f417-48e3-9ca4-ae48f66fa1ba	6	+	7	74,150,75,196,159,123,107,	0,9991,11786,13146,13483,13830,14137,	YA
chrI	3101852	3109527	c03c1951-23fb-4cfc-a092-dc4bd441f664	6	+	9	143,150,75,196,159,123,107,60,254,	0,2510,4305,5665,6002,6349,6656,6815,7421,	EMB
chrI	3101856	3109525	172cc5e9-f65d-4c66-aa67-f80b4dfe1a24	8	+	9	139,150,75,196,159,123,107,56,252,	0,2506,4301,5661,5998,6345,6652,6811,7417,	L1
chrI	3101864	3108334	46a7d028-3cc0-4246-9a39-d6a76157760a	8	+	6	131,150,75,196,159,133,	0,2498,4293,5653,5990,6337,	L1
chrI	3101909	3108723	b1f4bf12-0ca1-4b1e-a172-c48e80de19e5	7	+	8	86,150,75,196,159,123,107,56,	0,2453,4248,5608,5945,6292,6599,6758,	L1
chrI	3101911	3109525	8b81b291-4ce9-46b5-9502-a78bdcb9638f	8	+	9	84,150,75,196,159,123,107,56,252,	0,2451,4246,5606,5943,6290,6597,6756,7362,	L1
chrI	3101929	3108701	a8bcd19a-6ceb-4009-bec5-4fe11a5fff2a	8	+	8	66,150,75,196,159,123,107,34,	0,2433,4228,5588,5925,6272,6579,6738,	L1
chrI	3101952	3109529	e8c3c38f-825c-4249-90e4-3db7cedfa57e	6	+	9	43,150,75,196,159,123,107,56,256,	0,2410,4205,5565,5902,6249,6556,6715,7321,	EMB
chrI	3104354	3109454	db3d170d-9e88-43a8-9f9b-043388bfa952	6	+	8	158,75,196,159,123,107,56,181,	0,1803,3163,3500,3847,4154,4313,4919,	L1
chrI	3104354	3109532	08925ea8-bb1b-45d0-8195-bbe20ffc424f	6	+	8	158,75,196,159,123,107,56,259,	0,1803,3163,3500,3847,4154,4313,4919,	YA
chrI	3104355	3109404	1e6a0d87-4b02-4195-abe6-503c357a7277	7	+	8	151,75,196,159,123,107,56,131,	0,1802,3162,3499,3846,4153,4312,4918,	EMB
chrI	3104355	3109536	ae6ff163-3d70-4d0a-a1f7-f384104938cf	6	+	8	157,75,196,159,123,107,56,263,	0,1802,3162,3499,3846,4153,4312,4918,	EMB
chrI	3104355	3108601	62df3386-fe02-4343-8159-2dcfe051eaea	7	+	6	157,75,196,159,116,93,	0,1802,3162,3499,3857,4153,	EMB
chrI	3104355	3109496	e23c68ad-c7b8-478c-90ca-6fa7bb1de30d	7	+	8	157,75,196,159,123,107,56,223,	0,1802,3162,3499,3846,4153,4312,4918,	EMB
chrI	3104355	3109525	022a08c8-ba07-4a82-8834-34e6bb8c1be8	6	+	8	157,75,196,159,123,107,56,252,	0,1802,3162,3499,3846,4153,4312,4918,	EMB
chrI	3104355	3109312	aad83994-babc-40c8-857c-685a4dd1224c	6	+	8	157,75,196,159,123,107,56,39,	0,1802,3162,3499,3846,4153,4312,4918,	EMB
chrI	3104355	3109430	d4b6657a-1a96-4790-a136-29882e119e4e	8	+	8	157,75,196,159,123,107,56,157,	0,1802,3162,3499,3846,4153,4312,4918,	L1
chrI	3104355	3109546	4dda2ff6-e029-4a5d-b224-74c76291205b	6	+	8	157,75,196,159,123,107,56,273,	0,1802,3162,3499,3846,4153,4312,4918,	YA
chrI	3104356	3109530	c4c3e111-b827-4ec8-9b56-de8b69bb683c	6	+	8	156,75,196,159,123,107,56,257,	0,1801,3161,3498,3845,4152,4311,4917,	EMB
chrI	3104356	3109515	1ad1797b-dd6a-45c0-88ae-f0cf7cadacd4	8	+	8	156,75,196,159,127,107,56,242,	0,1801,3161,3498,3845,4152,4311,4917,	EMB
chrI	3104356	3109538	62bc2954-b9b3-4841-8b4c-0ddb3495be18	7	+	8	156,75,196,159,123,107,56,265,	0,1801,3161,3498,3845,4152,4311,4917,	EMB
chrI	3104356	3108323	3a9be6ac-9389-4c3a-837c-d60004475c2b	8	+	5	156,75,196,159,122,	0,1801,3161,3498,3845,	EMB
chrI	3104356	3109530	3d4b6ad2-2c08-42a2-8d48-02651a01807e	8	+	8	156,75,196,159,123,107,56,257,	0,1801,3161,3498,3845,4152,4311,4917,	EMB
chrI	3104356	3109484	a980f0c5-fe71-457d-802c-34ceb54b54ec	6	+	8	156,75,196,159,123,107,56,211,	0,1801,3161,3498,3845,4152,4311,4917,	EMB
chrI	3104356	3109534	7e1ae3ae-75a9-4936-a65a-3543b4fad982	6	+	8	156,75,196,159,123,107,56,261,	0,1801,3161,3498,3845,4152,4311,4917,	EMB
chrI	3104356	3109530	049cf005-5c97-4195-b437-fefde78e6934	8	+	8	156,75,196,159,123,107,56,257,	0,1801,3161,3498,3845,4152,4311,4917,	EMB
chrI	3104356	3109530	c7341b02-e69a-4373-a7c7-403a762d680a	6	+	8	188,75,196,159,123,106,56,257,	0,1801,3161,3498,3845,4157,4311,4917,	EMB
chrI	3104356	3108723	1ca64c7f-0232-4176-9b7c-ad2fe6d73b4a	6	+	7	156,75,196,159,123,107,56,	0,1801,3161,3498,3845,4152,4311,	EMB
chrI	3104356	3109525	4e5cbe98-74e4-4aa3-83b0-abc9eb727269	6	+	8	156,75,196,159,123,107,56,252,	0,1801,3161,3498,3845,4152,4311,4917,	EMB
chrI	3104356	3109453	06600d4b-4dc7-4dbe-b4a3-ce28ea5cbd51	12	+	8	156,75,196,159,123,107,56,180,	0,1801,3161,3498,3845,4152,4311,4917,	L1
chrI	3104356	3108317	7ec23ba4-d537-4e95-bc3d-a28d9b6ae8d6	13	+	5	156,75,196,159,116,	0,1801,3161,3498,3845,	L1
chrI	3104356	3108723	27ad5d06-1254-4a1f-8b23-e409fdb536a1	11	+	7	156,75,196,159,123,107,47,	0,1801,3161,3498,3845,4152,4320,	L1
chrI	3104356	3109529	7f0be81d-39cc-4cd3-83c0-2b7456e4434e	13	+	8	156,75,196,159,123,107,56,256,	0,1801,3161,3498,3845,4152,4311,4917,	L1
chrI	3104356	3109489	583611de-8434-45bf-bc5c-09f1755876cf	10	+	5	156,75,196,123,216,	0,1801,3161,3498,4917,	L1
chrI	3104356	3109532	775435f0-5e52-4ce9-885f-9fbbf7c8e5a6	10	+	8	156,75,196,159,123,107,56,259,	0,1801,3161,3498,3845,4152,4311,4917,	L1
chrI	3104356	3108612	f749990c-cf43-4283-97b6-f85d0891ab98	9	+	6	156,75,196,159,123,104,	0,1801,3161,3498,3845,4152,	L1
chrI	3104356	3109532	1c1af268-56b1-4b2c-b57f-906796956791	9	+	8	156,75,196,159,123,107,56,259,	0,1801,3161,3498,3845,4152,4311,4917,	L1
chrI	3104356	3109482	2af315b4-1597-48e5-90d2-ca4552d6d16f	11	+	7	1876,196,159,123,107,56,209,	0,3161,3498,3845,4152,4311,4917,	L1
chrI	3104356	3109530	c5195bc2-8f9c-4ab0-a950-8396feddfba8	10	+	8	156,75,196,159,123,107,56,257,	0,1801,3161,3498,3845,4152,4311,4917,	L1
chrI	3104356	3109529	d003e1a9-be0b-47d1-8d30-531759d6e783	8	+	8	156,75,196,159,123,107,56,256,	0,1801,3161,3498,3845,4152,4311,4917,	YA
chrI	3104356	3109532	be891f29-6b3c-45d7-a801-ee1abacbf0c9	7	+	8	156,75,196,159,123,107,56,259,	0,1801,3161,3498,3845,4152,4311,4917,	YA
chrI	3104356	3109535	2e33ac0a-38d0-432a-8796-bdae487bb30e	9	+	8	156,75,196,159,123,107,56,262,	0,1801,3161,3498,3845,4152,4311,4917,	YA
chrI	3104357	3108609	76d6b298-e6b1-47ab-a00c-ab89cf9d8bda	8	+	6	155,75,196,159,123,101,	0,1800,3160,3497,3844,4151,	EMB
chrI	3104360	3109520	768cd835-f5cf-41ff-aa47-87fe7ec097bb	7	+	8	152,75,196,159,123,107,56,247,	0,1797,3157,3494,3841,4148,4307,4913,	EMB
chrI	3104360	3109477	93731957-3a45-4792-be38-3fb68098ada6	6	+	8	152,75,196,159,123,107,47,204,	0,1797,3157,3494,3841,4148,4316,4913,	EMB
chrI	3104360	3109459	5f65aa34-5487-49da-92c2-2e4dd3e4acfa	6	+	8	152,75,196,159,123,107,56,186,	0,1797,3157,3494,3841,4148,4307,4913,	EMB
chrI	3104360	3109478	e58d9703-2c03-4367-83d7-ff4df31a35cb	8	+	8	152,75,196,159,123,107,56,205,	0,1797,3157,3494,3841,4148,4307,4913,	EMB
chrI	3104360	3109622	cad411e1-2c25-4fb0-a4f9-fa2041e1c4f3	6	+	8	152,75,196,159,117,107,56,349,	0,1797,3157,3494,3841,4148,4307,4913,	EMB
chrI	3104360	3109464	efdd8036-62fa-4c06-bf41-4a3142370133	10	+	8	152,75,196,159,123,107,56,191,	0,1797,3157,3494,3841,4148,4307,4913,	EMB
chrI	3104360	3109530	f192382b-b54d-4d8a-a18b-e724573515a0	12	+	8	152,75,196,159,123,107,56,257,	0,1797,3157,3494,3841,4148,4307,4913,	EMB
chrI	3104360	3109550	bf006fbd-6d98-4cac-914c-f6eee391f6e8	10	+	8	152,75,196,159,123,107,56,277,	0,1797,3157,3494,3841,4148,4307,4913,	EMB
chrI	3104360	3109625	a07d4647-06a6-4dd4-81ea-14770c9297c3	6	+	8	152,75,196,159,127,102,47,352,	0,1797,3157,3494,3841,4153,4316,4913,	EMB
chrI	3104360	3109620	46fd3f66-04ff-45cd-9f38-a8c2f6d40fbd	9	+	8	152,75,196,159,117,107,56,347,	0,1797,3157,3494,3841,4148,4307,4913,	EMB
chrI	3104360	3109538	5fa43821-18b5-4244-b87c-9021be395b70	6	+	8	152,75,196,159,123,107,56,265,	0,1797,3157,3494,3841,4148,4307,4913,	EMB
chrI	3104360	3109362	db3853b7-36a0-4d42-b878-e6750bcdb178	8	+	8	152,75,196,159,107,107,56,89,	0,1797,3157,3494,3841,4148,4307,4913,	none
chrI	3104360	3108250	ebe503b8-8241-49b3-872c-fa3e943e9cc6	6	+	5	152,75,196,159,49,	0,1797,3157,3494,3841,	none
chrI	3104360	3109585	aad3a585-dc26-4ba3-be32-4c90beb452d4	7	+	5	152,75,196,40,312,	0,1797,3157,3494,4913,	none
chrI	3104360	3109472	96ee2a7a-8ea2-40a4-a29f-1313140b1044	11	+	8	152,75,196,159,123,107,56,199,	0,1797,3157,3494,3841,4148,4307,4913,	L1
chrI	3104360	3109482	f6a13a4b-52cb-4e0f-9d58-9bd54dc0866b	10	+	8	152,75,196,159,127,102,56,209,	0,1797,3157,3494,3841,4153,4307,4913,	L1
chrI	3104360	3109516	98ed1455-5d50-4256-b239-23e3c0fd805e	9	+	8	152,65,196,159,123,107,56,243,	0,1797,3157,3494,3841,4148,4307,4913,	L1
chrI	3104360	3108605	dadf7772-b3b2-4c97-982a-8f31dc729c43	11	+	6	152,75,196,159,123,97,	0,1797,3157,3494,3841,4148,	L1
chrI	3104360	3109524	2b2b61d0-698e-44ac-8f42-18ac633fc86a	10	+	7	152,75,196,133,418,56,251,	0,1797,3157,3520,3841,4307,4913,	L1
chrI	3104360	3109528	2dba10a5-c9ba-415c-aaf2-bc4a206ca5fb	6	+	8	152,75,196,159,123,107,56,255,	0,1797,3157,3494,3841,4148,4307,4913,	YA
chrI	3104360	3109529	d33f0155-b89a-4149-bdd0-2265ca8710af	6	+	8	152,75,196,159,112,107,56,256,	0,1797,3157,3494,3852,4148,4307,4913,	YA
chrI	3104360	3109536	93907c6f-6ce1-4a54-84a5-edc3c3910198	6	+	8	152,75,196,159,123,107,56,263,	0,1797,3157,3494,3841,4148,4307,4913,	YA
chrI	3104360	3109530	6329619d-7e7e-4861-a8a5-8bfd67cec7b7	8	+	8	152,75,196,159,123,107,56,257,	0,1797,3157,3494,3841,4148,4307,4913,	YA
chrI	3104361	3109459	1e5fd711-1b54-4350-a752-16942d62a3e6	7	+	8	151,75,196,159,123,107,56,186,	0,1796,3156,3493,3840,4147,4306,4912,	EMB
chrI	3104361	3109609	0a1aa177-0f1e-4d59-9ad0-3018c8c869d6	9	+	8	151,75,196,159,123,107,56,336,	0,1796,3156,3493,3840,4147,4306,4912,	EMB
chrI	3104361	3108620	a117a555-0940-4902-958e-0637dd97de86	8	+	6	151,75,196,159,118,112,	0,1796,3156,3493,3840,4147,	EMB
chrI	3104361	3109504	5255bf4f-c1f1-4a87-a6ee-0677e32f4824	6	+	8	151,75,196,159,123,107,56,231,	0,1796,3156,3493,3840,4147,4306,4912,	EMB
chrI	3104361	3109484	aa84763b-338a-43a2-874b-8b1033ae2721	9	+	8	151,75,196,159,123,107,56,211,	0,1796,3156,3493,3840,4147,4306,4912,	none
chrI	3104361	3108708	170d9152-b3e3-4d30-bb88-97e6e827ee0e	9	+	7	151,75,196,159,123,107,41,	0,1796,3156,3493,3840,4147,4306,	L1
chrI	3104361	3109611	356f4216-2b3e-4368-bc4e-2833cc8c1ba1	10	+	8	151,75,196,159,112,107,56,338,	0,1796,3156,3493,3851,4147,4306,4912,	L1
chrI	3104361	3109494	6fcb82e7-4882-4705-a1a7-bada2df26b22	8	+	8	151,75,196,159,123,107,56,221,	0,1796,3156,3493,3840,4147,4306,4912,	L1
chrI	3104361	3109531	fb470c60-f08f-43fb-a4ba-16580f47e44c	12	+	8	151,75,196,159,123,107,56,258,	0,1796,3156,3493,3840,4147,4306,4912,	L1
chrI	3104361	3109492	c68bda3a-3fcd-44b2-aece-fb79ea4caa08	14	+	8	151,75,196,159,123,107,56,219,	0,1796,3156,3493,3840,4147,4306,4912,	L1
chrI	3104361	3109531	ff847eed-949e-40d8-8901-9c4e0c185af0	14	+	8	151,75,196,159,123,107,56,258,	0,1796,3156,3493,3840,4147,4306,4912,	L1
chrI	3104361	3109417	bb037827-1547-44f6-bf0a-f7d679de45c5	10	+	8	151,75,196,159,123,107,56,144,	0,1796,3156,3493,3840,4147,4306,4912,	L1
chrI	3104361	3109530	6a39427a-a720-4dfa-bd4b-6222d46efcc8	6	+	8	151,75,196,159,123,107,56,257,	0,1796,3156,3493,3840,4147,4306,4912,	YA
chrI	3104361	3109530	51a9c1f5-d703-41bf-bf24-e683e411845a	6	+	8	151,75,196,159,123,107,56,257,	0,1796,3156,3493,3840,4147,4306,4912,	YA
chrI	3104361	3108723	932cc3a0-85e5-483a-ac78-2d483db37ab2	8	+	7	151,75,196,159,123,107,56,	0,1796,3156,3493,3840,4147,4306,	YA
chrI	3104363	3109460	e609dad3-c4e9-4e29-bbac-80eea5ec8620	10	+	8	149,75,196,159,123,107,56,187,	0,1794,3154,3491,3838,4145,4304,4910,	L1
chrI	3104363	3109528	92662489-16d2-4128-8df1-e91b3078fdc4	8	+	7	149,75,196,159,123,158,255,	0,1794,3154,3491,3838,4145,4910,	YA
chrI	3104364	3109466	5c1a4675-b8ad-4f62-9ea3-5dc385f31a6d	8	+	8	148,75,196,159,123,107,56,193,	0,1793,3153,3490,3837,4144,4303,4909,	L1
chrI	3104365	3109529	c9fee90f-686b-44f6-bc3f-c808c13cb877	7	+	8	147,75,196,159,123,107,56,256,	0,1792,3152,3489,3836,4143,4302,4908,	EMB
chrI	3104365	3109531	175d9e33-908f-4e50-94e0-7cda363d7902	11	+	8	147,75,196,159,123,107,56,258,	0,1792,3152,3489,3836,4143,4302,4908,	L1
chrI	3104365	3109452	cb0189cb-a2fc-4729-9252-02f4075c474b	13	+	7	147,196,159,123,107,56,179,	0,3152,3489,3836,4143,4302,4908,	L1
chrI	3104365	3109527	21284f7a-c6e3-4f3c-bd3b-dfcb10dca981	9	+	8	147,75,196,159,123,107,56,254,	0,1792,3152,3489,3836,4143,4302,4908,	YA
chrI	3104371	3109478	b687b791-b0b0-4967-ac1c-993cb581066f	10	+	8	141,75,196,159,123,107,56,205,	0,1786,3146,3483,3830,4137,4296,4902,	L1
chrI	3104373	3109520	51546f7e-5528-4cf7-9b75-f7f8aac4d633	6	+	8	139,75,196,159,123,107,56,247,	0,1784,3144,3481,3828,4135,4294,4900,	EMB
chrI	3104381	3108709	243a72b5-08a0-46a9-925b-d6f1bc97ce66	12	+	7	131,75,196,159,123,107,42,	0,1776,3136,3473,3820,4127,4286,	EMB
chrI	3104381	3109459	8f8f975c-e5bb-4444-a8a8-4deae89455a5	11	+	8	131,75,196,159,123,107,56,186,	0,1776,3136,3473,3820,4127,4286,4892,	L1
chrI	3104382	3109536	e07e66ef-7eb4-480f-a42d-38b75f7eb389	13	+	8	130,75,196,159,123,111,56,263,	0,1775,3135,3472,3819,4126,4285,4891,	EMB
chrI	3104385	3109532	93776c3b-27f8-485d-a1ca-e7d4d3f75eab	9	+	8	127,75,196,159,123,107,56,259,	0,1772,3132,3469,3816,4123,4282,4888,	L1
chrI	3105669	3109540	424aa4c2-c3e6-42f6-a8f8-7fcf981aa3ff	6	+	6	563,196,159,123,107,294,	0,1848,2185,2532,2839,3577,	L1
chrI	3106166	3109487	8b34a47f-0cbe-47c4-9f49-0acf025931c0	8	+	7	66,196,159,123,107,56,214,	0,1351,1688,2035,2342,2501,3107,	EMB
chrI	3106176	3109493	e2e63a6b-8817-4282-9260-38c3bb8a3c1e	8	+	7	56,196,159,123,107,56,220,	0,1341,1678,2025,2332,2491,3097,	EMB
chrI	3107126	3109536	c27bd912-5376-4c62-be95-36f74678fad9	20	+	6	587,159,123,107,56,263,	0,728,1075,1382,1541,2147,	L1
chrI	3107515	3108707	63c34d63-6903-4c31-98f4-18feb964d725	10	+	5	198,159,127,102,40,	0,339,686,998,1152,	none
chrI	3107522	3109545	c199d482-15cf-4c91-a767-d3ff4e383e72	12	+	6	191,159,123,107,56,272,	0,332,679,986,1145,1751,	EMB
chrI	3107529	3109516	2b048c81-6d90-44c5-bb53-05834f4f43c1	8	+	6	209,133,127,107,56,243,	0,351,672,979,1138,1744,	EMB
chrI	3107552	3109461	71c8cbf5-36ca-4573-9b2d-1b814d8f3a38	10	+	4	161,159,75,188,	0,302,649,1721,	L1
chrI	3107591	3109540	19a5e86d-0f17-48e0-b2bf-61d9181e3af5	10	+	6	122,159,123,107,56,267,	0,263,610,917,1076,1682,	L1
chrI	3107645	3109419	a6a1d23e-a2eb-4f7f-b1a4-980cd6362486	10	+	6	68,159,123,107,56,146,	0,209,556,863,1022,1628,	L1
chrI	3107868	3109590	d4b224ca-c2db-44db-9026-c56f180963d8	8	+	5	145,123,107,56,317,	0,333,640,799,1405,	YA
chrI	3107878	3109415	5b416c9c-666d-42b1-98e3-b46651c64563	8	+	5	135,123,107,56,142,	0,323,630,789,1395,	EMB
chrI	3107923	3109464	908297ee-9355-4162-b085-583deb518836	6	+	4	90,123,111,218,	0,278,585,1323,	EMB
chrI	3108233	3109478	966d4b28-9711-4816-8f00-49e56c6b704c	7	+	4	85,107,56,205,	0,275,434,1040,	L1
chrI	3108242	3109503	372e3655-d4b1-43b6-a0d6-07abffd34928	7	+	4	82,107,56,230,	0,266,425,1031,	L1
chrI	3108253	3109530	81346308-eb71-439a-9cd2-6741533af2af	6	+	4	71,107,56,257,	0,255,414,1020,	YA
chrI	3108292	3109497	6e097530-58cb-495f-9c01-ca9c25893812	9	+	4	32,107,56,224,	0,216,375,981,	L1
chrI	3108306	3109621	dee47af5-5ac4-4102-952a-3b9d96802c61	8	+	4	18,107,56,348,	0,202,361,967,	EMB
chrI	3108508	3109402	bdbdbffc-81d5-4a0c-a8f4-311b0c37cadf	8	+	3	107,56,129,	0,159,765,	L1
chrI	3108508	3109519	35807708-add6-4b13-ac38-55f99bfa6e26	10	+	3	107,56,246,	0,159,765,	YA
chrI	3108662	3109532	b2b445be-811f-41c4-b17b-a25b6312b904	8	+	1	870,	0,	YA
chrI	3108682	3109611	49a8f2b5-8db7-47f9-9397-ca7bfe394301	6	+	2	41,338,	0,591,	EMB
chrI	3144438	3144606	e089af5b-91f6-47a6-86b6-b9d91856cb59	5	-	1	168,	0,	YA
chrI	3144727	3144888	4b9e7376-d51d-4af9-b670-039377b78ba6	5	-	1	161,	0,	YA
chrI	3158491	3159087	c2a6d438-314e-47c3-96bf-66f5b99a665c	6	-	1	596,	0,	EMB
chrI	3158491	3159189	fc1cab8b-e541-4891-b6ea-26ccc4566141	7	-	1	698,	0,	EMB
chrI	3158491	3159234	d6e3c4ed-1e5b-4e99-89a4-9de5b3bca473	10	-	1	743,	0,	EMB
chrI	3158491	3159105	bd08af13-56f3-477c-9126-faa5e9a3e78b	13	-	1	614,	0,	EMB
chrI	3158491	3159107	29526447-a96b-48f3-a4df-d0d2b7070f21	8	-	1	616,	0,	EMB
chrI	3158491	3158974	f374bfc9-3f1c-4936-ae57-86039adfc7db	8	-	1	483,	0,	EMB
chrI	3158491	3159133	89f5a45d-1330-4d36-8f1d-51c6164bfc85	8	-	1	642,	0,	EMB
chrI	3158491	3159060	54de2572-7909-43ff-bee3-f26c14579e76	6	-	1	569,	0,	EMB
chrI	3158491	3159303	d293aacd-270f-495f-97a3-fc1cc162e1b1	8	-	1	812,	0,	EMB
chrI	3158491	3159230	ba7392bd-7595-4e9b-9607-6e60ea63c59b	10	-	1	739,	0,	EMB
chrI	3158491	3159077	3bfab8d4-1ad2-4905-9ed8-afe2ed7e2813	8	-	1	586,	0,	EMB
chrI	3158491	3159207	959d63a2-99fe-4b3e-b253-f75e56f449dd	6	-	1	716,	0,	EMB
chrI	3158491	3159071	342fc47f-28cd-4d23-b0b5-be75f8194b6f	6	-	1	580,	0,	EMB
chrI	3158491	3159050	7148db4e-d86c-46b9-84e7-45684dfa4160	8	-	1	559,	0,	none
chrI	3158491	3159284	6585edf2-8b9b-41e9-beef-c080a0276a65	13	-	1	793,	0,	L1
chrI	3158491	3159322	a27a3bdb-f08c-4b08-8519-6cad547dfb78	9	-	1	831,	0,	L1
chrI	3158491	3159141	2fff1f28-d5d7-404c-bf12-ba4340cf21bb	8	-	1	650,	0,	YA
chrI	3158491	3159275	375d3cbb-40a1-4562-914c-f16355955eeb	8	-	1	784,	0,	YA
chrI	3158491	3159098	7217eae5-322f-4527-a532-342e5c29f605	6	-	1	607,	0,	YA
chrI	3158491	3159146	84fb8ccd-a9e7-4bd8-9c0a-8f42e459af22	10	-	1	655,	0,	YA
chrI	3158491	3158928	4ae7352e-6617-43c9-9171-2f169e48da5b	5	-	1	437,	0,	YA
chrI	3158491	3159039	70ec6c50-0129-4e8b-a009-c27db0281e17	8	-	1	548,	0,	YA
chrI	3158491	3159101	1eb7c98c-fb9c-4b7a-90d3-038591372e61	11	-	1	610,	0,	YA
chrI	3158491	3159060	8a8fb279-950c-4086-bb5d-facac7d6f2e9	10	-	1	569,	0,	YA
chrI	3158491	3158831	4af09ff4-4dd4-4bc0-82b1-532fce9d894b	7	-	1	340,	0,	YA
chrI	3158491	3159088	f7ee4657-2ef5-4783-a80a-643218a79fbd	7	-	1	597,	0,	YA
chrI	3158491	3159222	ce25e54a-2a0a-4822-96ba-e7b05d868374	10	-	1	731,	0,	YA
chrI	3158491	3159101	05bcc19b-5d5e-433a-947f-3b330bb9014c	8	-	1	610,	0,	YA
chrI	3158491	3159048	6b6695a5-51e1-44db-b8b4-b1138e5d0182	8	-	1	557,	0,	YA
chrI	3158491	3159290	8a382f1d-eb5e-4eec-87e5-2c629dc3f92b	7	-	1	799,	0,	YA
chrI	3158491	3158957	377ba16b-7e6a-4c50-a38e-fb80aef03bef	8	-	1	466,	0,	YA
chrI	3158491	3159238	0bdc96a8-11ea-41d6-913e-761ed328e2c9	10	-	1	747,	0,	YA
chrI	3158491	3159224	42b2f08c-72dd-41bc-a307-c04d91d3b883	12	-	1	733,	0,	YA
chrI	3158491	3159230	2550fe9f-a91d-4e6c-91de-6ad23f0c98a7	14	-	1	739,	0,	YA
chrI	3158491	3158988	a627b985-5ff2-454e-a0da-26161e1f0d4d	8	-	1	497,	0,	YA
chrI	3158491	3159114	77008a9e-39bb-4c2d-80d8-62ca1a0c3889	8	-	1	623,	0,	YA
chrI	3158494	3159047	dfa8f9cd-6a40-4103-8a5d-e6e0c6d64b47	13	-	1	553,	0,	YA
chrI	3158494	3159237	6b3674b6-10cf-4570-be05-adfebc76deaf	11	-	1	743,	0,	YA
chrI	3158495	3159095	a73aab29-8739-4cb4-b2a1-37f6a4e3f7e5	8	-	1	600,	0,	EMB
chrI	3158497	3159141	b6d308ab-6ac9-4707-b1e3-4ff0514130de	4	-	1	644,	0,	EMB
chrI	3158497	3159193	aa06ac3c-9e16-4f33-a2c2-dc4f8a67473b	16	-	1	696,	0,	L1
chrI	3158497	3159311	5b2bfb5d-a127-44af-816a-370dfeb123ff	6	-	1	814,	0,	YA
chrI	3158498	3159059	cd350872-d819-4033-98bb-6f74733c50b7	10	-	1	561,	0,	YA
chrI	3158500	3159225	b0a47276-5afd-48f1-a3a0-670382d2aca6	16	-	1	725,	0,	L1
chrI	3158505	3158812	be307060-86fb-4049-b07e-8beccc157118	8	-	1	307,	0,	EMB
chrI	3158506	3159289	27d7d439-1866-43d9-ab0a-c26d64624196	6	-	1	783,	0,	EMB
chrI	3158537	3159097	30c47b11-6c1e-421a-8901-ab566e8ad1ab	8	-	1	560,	0,	EMB
chrI	3158543	3159242	a38febec-3105-403e-a33a-959d59beaee9	5	-	1	699,	0,	YA
chrI	3158570	3159186	3b7fd241-1551-4209-a49c-6839dd866268	12	-	1	616,	0,	L1
chrI	3158689	3159222	a675f58f-2baf-4984-95b5-0c8df9298139	10	-	1	533,	0,	EMB
chrI	3158747	3159203	351657a3-835f-41f2-a1c0-db83afbcfa5b	8	-	1	456,	0,	EMB
chrI	3158820	3159228	63d5e3a4-b553-4b89-a0e7-b7402a25d1cf	16	-	1	408,	0,	L1
chrI	3158858	3159064	5d9c1ab9-4cf6-485b-9216-327ea7ecc0da	6	-	1	206,	0,	YA
chrI	3158891	3159251	96267b80-5ed1-4ae1-ac81-e01e5dcb5886	6	-	1	360,	0,	YA
chrI	3158903	3159296	624d9275-d38d-4fda-826b-e80fc6115392	6	-	1	393,	0,	L1
chrI	3158907	3159234	80a2ec12-2913-4fb6-ab0c-5b879690ec52	10	-	1	327,	0,	YA
chrI	3158908	3159252	fd4c5ae1-b8ab-4eb7-800f-c26167fa951f	8	-	1	344,	0,	L1
chrI	3159356	3162379	ac5cdf2c-c0e3-486d-86c0-72bda2d5db49	6	-	8	511,185,1061,313,60,51,93,164,	0,566,798,1927,2286,2382,2720,2859,	YA
chrI	3159368	3162396	467d1932-ec39-4eed-8c22-833333b7904b	6	-	7	499,191,1061,317,147,93,181,	0,554,786,1911,2274,2708,2847,	YA
chrI	3159409	3162377	c2b47d2d-176d-4753-9b5d-5d943778d22d	8	-	6	458,1293,313,147,93,162,	0,513,1874,2233,2667,2806,	YA
chrI	3159433	3162380	91225770-043b-4782-865f-383eeab810bb	9	-	8	434,185,1061,313,60,51,93,165,	0,489,721,1850,2209,2305,2643,2782,	YA
chrI	3159446	3160602	0d589cae-e2e0-4bd6-9b2d-33b5595c81b7	6	-	3	421,189,448,	0,472,708,	EMB
chrI	3159446	3162384	a26006e8-cc4a-4632-b59b-5b0c90ae8340	7	-	8	421,195,1061,313,60,51,93,169,	0,472,708,1837,2196,2292,2630,2769,	YA
chrI	3159502	3160670	ca18c5a5-5448-4768-8ee7-95c4efbc4fdd	8	-	3	365,195,516,	0,416,652,	EMB
chrI	3159529	3162391	4fc5f129-8307-4385-b725-396d2941f006	6	-	8	338,185,1061,313,51,51,93,176,	0,393,625,1754,2113,2209,2547,2686,	YA
chrI	3159595	3162387	d4c5d5db-ef56-40fe-82d6-4686770b8f74	6	-	7	272,185,1061,317,147,93,172,	0,327,559,1684,2047,2481,2620,	EMB
chrI	3159603	3162384	97bdff90-5f87-40b8-adc4-57dbd474d105	6	-	7	264,185,1061,313,147,93,169,	0,319,551,1680,2039,2473,2612,	YA
chrI	3159611	3161373	7d3eb53d-82c9-4c22-bbeb-810293b26753	9	-	4	256,185,1061,90,	0,311,543,1672,	EMB
chrI	3159631	3162113	6f5d987b-0c71-41b3-b535-6a0cd0c2cb35	9	-	5	236,1293,313,147,37,	0,291,1652,2011,2445,	EMB
chrI	3159632	3162036	a67e55c0-83ac-4894-9899-1089efb3bec3	10	-	7	235,189,1061,313,51,51,119,	0,286,522,1651,2010,2106,2285,	L1
chrI	3159635	3160189	2e43dac7-ce3a-4883-ad7e-53674eb6cc9d	8	-	3	232,191,35,	0,287,519,	YA
chrI	3159636	3162379	140b277f-5bd9-4478-becc-209a373367b5	7	-	8	224,189,749,145,313,51,333,106,	0,282,518,1434,1647,2006,2102,2637,	YA
chrI	3159636	3162323	11a5c6c2-def1-4c93-9937-cb9d0cf49d0f	9	-	8	231,185,1061,313,60,51,93,108,	0,286,518,1647,2006,2102,2440,2579,	YA
chrI	3159636	3162377	d8d67196-2c58-4480-b312-406f31b7a394	8	-	8	231,191,1061,313,60,51,93,162,	0,286,518,1647,2006,2102,2440,2579,	YA
chrI	3159636	3162352	97d863ea-e705-4000-a0d5-1396c5110305	6	-	8	231,185,1061,313,60,51,93,137,	0,286,518,1647,2006,2102,2440,2579,	YA
chrI	3159636	3162391	4610c0a7-2248-43c4-bcde-ddfae3c7e8d4	6	-	8	231,191,1061,313,60,51,93,176,	0,286,518,1647,2006,2102,2440,2579,	YA
chrI	3159638	3161564	792b5bd0-953b-4e27-ab7f-3bebcb66302a	14	-	4	229,185,1061,281,	0,284,516,1645,	L1
chrI	3159638	3160499	771d1e21-4102-4166-af4e-7f14ce4b3687	8	-	3	229,185,345,	0,284,516,	YA
chrI	3159642	3160755	1f16c340-5711-4c79-8238-c043e09f7cda	6	-	2	222,830,	0,283,	EMB
chrI	3159642	3162387	943aaf2c-a06a-4d91-97ac-5680149019c2	7	-	8	225,189,1061,313,51,51,93,172,	0,276,512,1641,2000,2096,2434,2573,	L1
chrI	3159664	3160374	a546afb4-966b-40fa-bd8b-cd16abc15560	11	-	3	203,185,220,	0,258,490,	EMB
chrI	3159673	3162379	5c78f885-a31f-4b3f-b82b-5c2287ecb27c	8	-	8	194,185,1061,313,51,51,93,164,	0,249,481,1610,1969,2065,2403,2542,	EMB
chrI	3159675	3162170	17e144c2-a658-48b4-85cf-8caa78f4e43d	8	-	7	192,185,1057,317,51,51,94,	0,247,479,1604,1967,2063,2401,	L1
chrI	3159683	3160043	9d024b3c-961f-4fd0-8e7f-fac6c674d270	6	-	2	184,121,	0,239,	none
chrI	3159684	3162373	c8123124-2caa-4b20-9d2b-c65c7b6e5dd1	7	-	8	183,185,1061,313,60,51,93,158,	0,238,470,1599,1958,2054,2392,2531,	YA
chrI	3159687	3160380	035ba78f-8e81-4cd7-af66-698f49dc9dbe	12	-	3	180,185,226,	0,235,467,	YA
chrI	3159701	3160380	1330f7c0-785b-4cdb-b926-3b5f35816216	10	-	3	166,185,226,	0,221,453,	L1
chrI	3159701	3162379	b649a9f3-2aaf-4c2f-bf0d-d61680491b52	7	-	7	153,195,1061,313,60,140,164,	0,217,453,1582,1941,2328,2514,	YA
chrI	3159720	3160112	ccd29d61-13ba-4ba3-ad23-f75618da1fd0	12	-	2	147,194,	0,198,	EMB
chrI	3159771	3161566	3157f7d4-b779-4dc9-877a-57c20ffe9ec6	8	-	4	96,187,1061,283,	0,155,383,1512,	YA
chrI	3159795	3162376	e8e79baa-0450-4f2b-b809-3cd7c557b07c	13	-	7	72,185,1061,317,63,123,161,	0,127,359,1484,1847,2251,2420,	L1
chrI	3159797	3162339	59fed68b-265a-4ece-9197-259198d7bb85	10	-	8	70,189,1061,313,51,51,227,124,	0,121,357,1486,1845,1941,2120,2418,	L1
chrI	3159819	3162385	163f366a-a3d7-4114-be5f-987a1774ddfa	8	-	8	48,185,1057,317,51,51,93,170,	0,103,335,1460,1823,1919,2257,2396,	EMB
chrI	3159924	3162387	b6197d11-8d81-46b3-8158-19e0b192a136	6	-	4	189,1057,506,311,	0,230,1359,2152,	EMB
chrI	3159994	3160418	96ce04f4-1e24-4413-b9ce-09f90f55bb29	6	-	2	113,264,	0,160,	EMB
chrI	3160154	3161598	b4b5b327-ca41-4e66-a5f6-8a422f667e5f	8	-	3	195,761,319,	0,296,1125,	YA
chrI	3160330	3162380	77286a8d-4655-4931-97b3-b6da6e552779	11	-	6	885,313,51,51,252,165,	0,953,1312,1408,1587,1885,	EMB
chrI	3160435	3162379	04e24db4-de59-4b26-aea3-66767d497463	8	-	6	780,313,51,51,93,164,	0,848,1207,1303,1641,1780,	EMB
chrI	3160512	3162376	653dd51f-4502-4919-88cf-7c416be973c6	6	-	6	703,313,60,51,93,161,	0,771,1130,1226,1564,1703,	YA
chrI	3160659	3162379	15d5f2f0-d317-426d-8d85-cfcf9975af2d	7	-	6	556,313,60,51,252,164,	0,624,983,1079,1258,1556,	EMB
chrI	3160707	3162377	ceb07eed-9695-4c23-a281-93d686f13c9e	6	-	5	508,313,147,93,162,	0,576,935,1369,1508,	YA
chrI	3160857	3162387	018b438d-0e1c-470a-ab65-fd904300ecca	6	-	4	358,410,93,172,	0,426,1219,1358,	EMB
chrI	3161459	3162391	84d96064-f522-41d8-9255-6e538107d9c3	6	-	4	178,43,252,176,	0,287,458,756,	EMB
chrI	3161463	3162288	7c88f1b8-1c9f-4017-a45e-3916a8b2f494	7	-	5	133,51,51,252,73,	0,179,275,454,752,	EMB
chrI	3167716	3168057	907e4cdd-0e81-41ae-b242-130c24556ca1	10	+	1	341,	0,	L1
chrI	3167721	3168046	416993fc-a02a-41f3-bd23-bd187d552f30	11	+	1	325,	0,	YA
chrI	3167743	3168057	fab3d025-260f-4718-9caa-526ebce2eaa6	10	+	1	314,	0,	L1
chrI	3167746	3168057	7e1b2979-260f-47ec-801c-0c279041f2dd	8	+	1	311,	0,	EMB
chrI	3167812	3168051	7040add5-11b3-4a63-bb13-1e00030af3a4	8	+	1	239,	0,	YA
chrI	3178203	3178824	c3696998-3bb9-4d86-9fb1-d01e7c0acaed	8	-	1	621,	0,	L1
chrI	3178208	3178590	a1cdeac2-12a2-4174-a7e0-c31b267c5923	8	-	1	382,	0,	L1
chrI	3178290	3178814	2e96123d-02d2-4ccd-a915-7fdfb65304f6	8	-	1	524,	0,	L1
chrI	3223151	3223403	663cc12f-9382-4ebd-a71f-6bc0fbaa9456	8	-	1	252,	0,	YA
chrI	3223263	3223431	3beff98f-6348-4c73-b520-edb6ae62870e	8	-	1	168,	0,	EMB
chrI	3227666	3227851	b689e86f-f097-4f7d-91d8-609732686a23	8	-	1	185,	0,	EMB
chrI	3232980	3233171	b3b675ac-d526-496e-b58f-e960d40772b0	8	+	1	191,	0,	EMB
chrI	3233119	3233279	d43f8384-6844-47c0-af09-b74bdf920b7f	7	+	1	160,	0,	EMB
chrI	3236914	3237217	122d14b1-2955-4ae0-8420-57f5a0814690	6	-	1	303,	0,	EMB
chrI	3236939	3237158	76d7ba11-2735-4155-b483-3d95ef5fec73	4	-	1	219,	0,	EMB
chrI	3254395	3256066	aeaadae1-8b8b-4f64-8311-16dc5f426fb0	8	+	2	52,651,	0,1020,	YA
chrI	3254793	3255833	9b81e2fa-d5af-4e02-9832-9c666a7d5177	4	+	1	1040,	0,	EMB
chrI	3255430	3256080	8957c472-3a0b-408f-8fa2-bad8ec81bd63	8	+	1	650,	0,	EMB
chrI	3255437	3256066	b1d4c0da-21ee-4181-92a9-ee471a311dfa	6	+	1	629,	0,	YA
chrI	3255540	3256077	cbb02d5f-2340-4f82-8e36-480bfdacc402	6	+	1	537,	0,	YA
chrI	3255560	3256322	49797b13-74f4-4f02-ae9d-39c766df101d	11	+	1	762,	0,	L1
chrI	3255581	3256067	044aca1c-1dd9-44b3-89f7-57a40aea81b9	8	+	1	486,	0,	YA
chrI	3255581	3256035	81ceb137-7f9b-4140-98ee-c35f12cd369d	8	+	1	454,	0,	YA
chrI	3255592	3255933	68832c0a-aef1-4e11-9f0f-02a082c43431	6	+	1	341,	0,	EMB
chrI	3255601	3256066	ebb92ab4-2940-40e3-8e47-5fc1b3a64ea8	5	+	1	465,	0,	YA
chrI	3255605	3256084	17327d37-6670-4ce4-a99f-b9a53c6a57cc	8	+	1	479,	0,	EMB
chrI	3255616	3256067	bc80cc26-bb4d-4bc2-9866-5f09d5cb22cc	4	+	1	451,	0,	none
chrI	3255624	3256066	324bddca-eb2f-4b2d-a487-f59a35a5b950	6	+	1	442,	0,	YA
chrI	3255638	3256080	c3ba2698-b12a-43a0-bb3e-b94033d39325	8	+	1	442,	0,	EMB
chrI	3255639	3256067	853249ff-2153-4da6-b9cf-fc72c68cca40	8	+	1	428,	0,	EMB
chrI	3255648	3256049	a519970d-a581-4b85-84d1-6f100ec14768	6	+	1	401,	0,	EMB
chrI	3255648	3256080	c9c98b79-993c-4e4f-9ec5-fd8b30e0dfce	8	+	1	432,	0,	EMB
chrI	3255648	3256068	0311a040-7093-4dd3-925e-70f85db53055	8	+	1	420,	0,	YA
chrI	3255656	3256075	871370c2-190c-4659-9ac4-8e700426d1f8	8	+	1	419,	0,	EMB
chrI	3255677	3256067	dca11382-408f-4477-ae32-5d8d28defef8	11	+	1	390,	0,	YA
chrI	3255725	3256077	3d6070fe-24d6-490b-a160-790d64e537b6	8	+	1	352,	0,	none
chrI	3255777	3256056	23629737-b6ca-46a6-8ac5-587f182124fa	6	+	1	279,	0,	YA
chrI	3255795	3256064	345b03ae-5bef-43a4-99c8-5b81baa9e1fc	8	+	1	269,	0,	EMB
chrI	3255802	3256066	48e2ac28-2989-47a7-aa20-c102c24f32ab	7	+	1	264,	0,	YA
chrI	3255844	3256048	5e9a97fe-3960-417c-ad79-011a50a4438e	11	+	1	204,	0,	YA
chrI	3269403	3269759	492e3057-8368-4d03-b176-780e84113135	6	-	1	356,	0,	YA
chrI	3269412	3269775	ab8e681c-2cdb-487e-be3f-9a2ec31870e8	6	-	1	363,	0,	YA
chrI	3269580	3269992	c7fdb29d-8c8f-4952-931e-5881f794855b	13	+	1	412,	0,	L1
chrI	3296783	3298268	1ba58c7a-842b-4348-83eb-c9396421a8c1	8	-	1	1485,	0,	EMB
chrI	3296985	3297644	9119f219-3bdd-4b22-944a-910ecfcd8620	12	-	1	659,	0,	L1
chrI	3301362	3301734	6c802174-bcf3-41f8-b17d-4ed203eed453	8	-	1	372,	0,	L1
chrI	3301374	3301819	37321d68-82f4-44f0-ae7e-8a262108025f	10	-	1	445,	0,	L1
chrI	3301387	3301887	191292ad-6ca0-4ed5-98d3-c29fad57d0d1	6	-	1	500,	0,	EMB
chrI	3301387	3302041	edee47a3-8ce3-41c3-b69c-edcd4bdb39e1	10	-	1	654,	0,	L1
chrI	3301387	3301944	083d1993-2656-4a1a-9938-fb84d178bb83	10	-	1	557,	0,	YA
chrI	3301387	3301750	d3a451ed-5097-4a92-981b-6d18a18a86df	7	-	1	363,	0,	YA
chrI	3301388	3302189	d3dd474f-a994-4161-a5d5-bf8f393031e1	4	-	1	801,	0,	EMB
chrI	3301396	3301863	3e84598a-e0f3-40e6-b377-72c0772ce971	6	-	1	467,	0,	EMB
chrI	3301396	3302208	303b609c-e694-41c6-ab97-d41691a2e8de	9	-	1	812,	0,	L1
chrI	3301407	3301839	28ca8063-0205-4fbf-a84d-e5dff55d6d3d	6	-	1	432,	0,	EMB
chrI	3301411	3301844	1a8b8da5-fa07-4f23-8c49-1bd7baf1d9a2	6	-	1	433,	0,	EMB
chrI	3301411	3301857	b887c0b2-3062-48af-951f-34d3d9279090	8	-	1	446,	0,	L1
chrI	3301419	3301805	4135d530-6dda-4a25-8287-e5f6e92e677d	10	-	1	386,	0,	EMB
chrI	3301442	3301773	9d9a2ae9-13b8-49f3-814a-f0856b9646cb	11	-	1	331,	0,	L1
chrI	3318801	3319380	67151084-3a86-4e62-a9da-53fdc5f20406	8	-	1	579,	0,	EMB
chrI	3318829	3319671	659dd0a5-e339-40a3-bf06-584bc388c376	6	-	1	842,	0,	EMB
chrI	3318829	3319516	77f336a9-e212-4239-bdbc-cb3f3a9e76a1	11	-	1	687,	0,	EMB
chrI	3318829	3319319	8739a7ca-cdd8-4f08-9008-785e17b3f00b	8	-	1	490,	0,	EMB
chrI	3318829	3319728	f669eb05-9964-49e9-9e12-c9b83fa54eb2	6	-	1	899,	0,	EMB
chrI	3318829	3319466	2d390f9c-3e9e-4a86-ac24-d8652fa88545	8	-	1	637,	0,	EMB
chrI	3318829	3319391	b3ef4bd9-7beb-4c0d-a297-033eb28d4cdb	10	-	1	562,	0,	L1
chrI	3318829	3319388	29e08468-f19c-4238-9ee7-f01b8915499a	10	-	1	559,	0,	L1
chrI	3318829	3319384	ed057e67-fdfb-47c9-be63-00eafa2f616b	8	-	1	555,	0,	YA
chrI	3318830	3319496	b88fde3d-0dc0-4b01-9144-1d3df68946eb	8	-	1	666,	0,	EMB
chrI	3318830	3319658	26c90dca-ffa4-48af-a854-cf1665c7267c	8	-	1	828,	0,	YA
chrI	3318830	3319386	7a4a19a1-a676-434f-81ab-01c6bf42763a	8	-	1	556,	0,	YA
chrI	3318830	3319368	ff863a77-2db6-4d40-93b4-4cc0994aa0fa	6	-	1	538,	0,	YA
chrI	3318831	3319558	2b2fe400-2f4d-4df1-b005-88d2aff17eb7	8	-	1	727,	0,	EMB
chrI	3318831	3319465	b53dce30-d0d9-4d6a-b4be-e98812e2ac48	12	-	1	634,	0,	EMB
chrI	3318832	3319419	130ec59f-1464-4935-ace0-cf5f9725ac1e	12	-	1	587,	0,	YA
chrI	3318836	3319746	b13b7295-3177-456f-89f1-06e1a15f4000	6	-	1	910,	0,	YA
chrI	3318837	3319514	9a5e3ca1-c4f4-4f80-828b-489553741f39	9	-	1	677,	0,	L1
chrI	3318858	3319509	07802f0e-eff6-46f7-8c1a-687fe87abb26	6	-	1	651,	0,	EMB
chrI	3318858	3319660	cc77f27c-234b-43d8-bdd1-689eb046e944	8	-	1	802,	0,	L1
chrI	3318878	3319569	5b3334c8-a95e-45d1-be7b-c7be1d5a61c8	10	-	1	691,	0,	YA
chrI	3318890	3319516	2ad22d2a-d7dd-4510-91cd-16bd02cbf98e	7	-	1	626,	0,	EMB
chrI	3318934	3319430	ac8777c6-b7ab-4454-bc85-4bbd938b3868	10	-	1	496,	0,	YA
chrI	3318942	3319214	d96a2397-3b7d-41f7-a3df-ce0f79f94628	8	-	1	272,	0,	EMB
chrI	3318952	3319509	83ea8562-cf43-4115-9cd3-3b72b6258e39	8	-	1	557,	0,	EMB
chrI	3318953	3319469	6dff1668-4f30-4c10-9c1c-c12bab51b8b9	15	-	1	516,	0,	L1
chrI	3318965	3319631	9a684f2a-39d9-44e0-b0f6-dd5f688c1049	12	-	1	666,	0,	L1
chrI	3318986	3319431	84892c8f-6455-43c7-b25b-bd87e2f41467	14	-	1	445,	0,	L1
chrI	3319070	3319380	ba34f7d4-0ba2-47dd-be38-2cea8668313c	8	-	1	310,	0,	L1
chrI	3319233	3319711	489930a7-5a0d-43d9-b8ef-571e35bf42f1	8	-	1	478,	0,	EMB
chrI	3319369	3319713	ed53a6ec-0b95-45bf-acf0-01b6c5232119	15	-	1	344,	0,	L1
chrI	3327911	3328164	efc015d3-5d1a-45e4-9e46-952c5ff8690d	10	+	1	253,	0,	L1
chrI	3340222	3340462	d8e5ca1b-db20-43a8-8353-3b598311697d	6	-	1	240,	0,	EMB
chrI	3340222	3340481	e1261deb-04da-4813-80d1-8b8174f90b24	6	-	1	259,	0,	EMB
chrI	3340235	3340450	3be7a7e7-7279-4169-8113-26c3424bd1c6	8	-	1	215,	0,	L1
chrI	3340237	3340510	a5447192-55d1-4d97-a081-3b59a84fb8f0	10	-	1	273,	0,	L1
chrI	3340313	3340730	e99ac32a-3905-46a5-8000-e84778a56713	6	-	2	292,83,	0,334,	EMB
chrI	3342228	3342564	b4c5fc9c-e0cc-4996-b55b-25657774b82a	6	-	1	336,	0,	EMB
chrI	3342254	3342587	13b5b63f-cb33-42f0-aab2-6bc8a0e9e0c9	8	-	1	333,	0,	EMB
chrI	3350336	3350548	d674cc29-e985-4523-87ec-737c69bc7167	8	-	1	212,	0,	YA
chrI	3350336	3350540	a65da5cc-ffba-462a-aa64-7b21a430ff9f	10	-	1	204,	0,	YA
chrI	3350349	3350545	360cd5ee-6414-4a43-aac6-41ec87052764	8	-	1	196,	0,	YA
chrI	3350349	3350545	574945cd-5ff1-4d76-bb09-976440de63f0	8	-	1	196,	0,	YA
chrI	3350350	3350546	0d1bfab5-e62a-4299-8e67-6a55e3972db7	8	-	1	196,	0,	YA
chrI	3350350	3350546	541019a2-6f40-48bd-a633-caf28e314444	8	-	1	196,	0,	YA
chrI	3350352	3350514	35785dcb-f7d1-46d4-909f-8dbd92d398da	8	-	1	162,	0,	L1
chrI	3350353	3350544	3c9dc809-357e-4b33-b95e-00b96fc150ea	8	-	1	191,	0,	YA
chrI	3350355	3350545	e9a3b1db-2f2d-4996-aa1d-799039177d57	8	-	1	190,	0,	YA
chrI	3350355	3350547	efbcbf8b-4b93-4ca3-b806-0c5a1a5d5af6	8	-	1	192,	0,	YA
chrI	3350355	3350549	51b1e79b-4b14-45c9-862b-7e9171f85e6d	8	-	1	194,	0,	YA
chrI	3350361	3350545	ac39a356-0456-4f13-afdf-06425c14d6f2	8	-	1	184,	0,	YA
chrI	3374776	3375144	13fa42ac-cfb9-407a-a79a-452dc335dc58	8	-	1	368,	0,	EMB
chrI	3407955	3408465	e18e02ab-9bbc-4542-a4c5-cd6638205ae7	9	-	1	510,	0,	L1
chrI	3410124	3410350	e07e8bca-e59c-48f2-8bea-00f84d054c0d	11	+	1	226,	0,	YA
chrI	3415902	3416364	3f45b1b8-c2ae-47ab-87e3-a2052460d794	8	+	1	462,	0,	EMB
chrI	3415956	3416358	f37faa91-9fb8-4020-a7f9-04effa2c34b7	6	+	1	402,	0,	YA
chrI	3415966	3416316	df03f0e3-71ea-4ff8-aff7-abf02cd40f61	8	+	1	350,	0,	L1
chrI	3415995	3416368	ac940bb2-eb88-4c08-9c6e-e08a38b45df6	8	+	1	373,	0,	EMB
chrI	3416013	3416358	a3b6b492-ab38-4604-b53b-34a1e7210a43	6	+	1	345,	0,	EMB
chrI	3416013	3416360	cfefb11b-66ca-4301-a98b-1b9a27b26ef3	6	+	1	347,	0,	YA
chrI	3416042	3416350	91d5d0ab-3243-46bd-a78a-6bd07c22d94f	13	+	1	308,	0,	L1
chrI	3416055	3416353	40cfc9bc-819c-4196-8bf6-de73d3fdc9a1	8	+	1	298,	0,	EMB
chrI	3416058	3416358	e382fab3-028b-4719-b327-1209992d610c	6	+	1	300,	0,	EMB
chrI	3416079	3416369	c7791a52-3bd3-44ec-8d81-6cdf719d5b44	6	+	1	290,	0,	EMB
chrI	3416423	3416742	499b0e3e-8ee0-4b7b-987b-93940b3694e5	12	+	1	319,	0,	EMB
chrI	3433159	3433425	2753a9fe-4cd7-4008-9553-93461b501076	8	-	1	266,	0,	EMB
chrI	3447630	3447968	fba620b4-5c57-4d24-85f1-fc12cdc5b348	7	+	2	64,223,	0,115,	L1
chrI	3447745	3447968	4567a826-dda8-4f8a-99aa-80e6ef7aed48	8	+	1	223,	0,	YA
chrI	3448861	3449164	6c35dbd5-10aa-4cda-9f72-0adb9ff62a0e	7	+	1	303,	0,	EMB
chrI	3448929	3449177	c0610a3d-2125-4b7e-9c56-2fd1e31d3461	6	+	1	248,	0,	YA
chrI	3448993	3449177	7e0269f6-da62-47c1-8c43-3fb96818238c	7	+	1	184,	0,	EMB
chrI	3449325	3449460	d7452036-c7f9-4b80-81bf-483a11a09073	8	+	1	135,	0,	YA
chrI	3461798	3462103	dde71bab-59cc-4367-ab08-303b027526ab	6	+	1	305,	0,	YA
chrI	3461814	3462104	0450d6b7-e1cb-4e0f-8335-1324e97f0d77	6	+	1	290,	0,	YA
chrI	3461828	3462094	44033ebb-90f2-41a6-a08e-5a76574081f8	7	+	1	266,	0,	YA
chrI	3461890	3462174	a19eec34-fd2c-4bf9-b004-48dec09d5912	8	+	1	284,	0,	L1
chrI	3461910	3462173	ffd2b706-9daa-4e2d-abd9-c11160dfbd15	8	+	1	263,	0,	YA
chrI	3461983	3462174	451f097e-4440-45d9-a7d9-bcb0ee4796aa	10	+	1	191,	0,	EMB
chrI	3470811	3471009	100898be-8a44-4ba5-85e8-90c484a907c2	8	+	1	198,	0,	EMB
chrI	3477660	3478106	244df4e1-543d-46ae-adff-6f2d767fbcbb	8	+	1	446,	0,	YA
chrI	3477660	3477951	b4d26dc6-5d2d-4b8f-aab6-d1046fb02761	6	+	1	291,	0,	YA
chrI	3477667	3478676	8302aad9-41b0-4e52-916b-073ad6fa68ea	6	+	2	530,20,	0,989,	EMB
chrI	3477683	3478416	ef6da3ca-240d-49e5-bc9b-68367ba4d653	8	+	1	733,	0,	EMB
chrI	3477793	3478504	91d481fc-ce6a-42f7-8397-9669ab6c6107	7	+	1	711,	0,	YA
chrI	3477808	3478339	da3c1160-cb30-4358-a378-c6f50441fe28	6	+	1	531,	0,	YA
chrI	3477812	3478492	0aa43cb2-eb14-4535-b943-2cbfbc22160d	6	+	1	680,	0,	YA
chrI	3477837	3478517	391f9b7a-0adb-4174-ba50-f0872f80ba0d	11	+	1	680,	0,	L1
chrI	3477843	3478471	af2589f1-ad2f-4208-a1ad-f1cd586c5bac	8	+	1	628,	0,	YA
chrI	3477871	3478510	7f43e080-3660-480a-9e07-ad661542abbc	8	+	1	639,	0,	YA
chrI	3477884	3478511	5a07421d-7bb5-4e78-a57c-0288ecd86039	10	+	1	627,	0,	YA
chrI	3477938	3478348	e28b72af-1405-4871-8239-28bc00be871e	10	+	1	410,	0,	EMB
chrI	3477940	3478519	9b03ed01-f841-4058-bda5-ed7da9473c2f	8	+	1	579,	0,	EMB
chrI	3477941	3478517	29ea084e-f86d-4832-836e-3fa9b10c7988	10	+	1	576,	0,	YA
chrI	3477951	3478466	99007747-e166-4850-999d-73eb3abc9221	9	+	1	515,	0,	EMB
chrI	3477954	3478505	3e0a8865-9f18-4b7e-91b7-4616599b7619	8	+	1	551,	0,	YA
chrI	3477965	3478223	67bf02e1-690e-46f8-909e-ea57f081a41a	10	+	1	258,	0,	EMB
[truncated: 69,670 more rows]
