# Supplementary material for: Direct full-length RNA sequencing reveals unexpected transcriptome complexity during Caenorhabditis elegans development
Source: HighWire-hosted journal article supplement (doi:10.1101/gr.251512.119), 2020-02-01
Supplement: Supplemental_Table_S5.xlsx [file Supplemental_Table_S5.xlsx]

## Sheet: by_site
Table S5. List of loci with missing genomic sequences that affect exon revealed by direct RNA sequencing
Insertion site	Supporting read_number	WBID	Symbol	Sequence name	Concise description	Gene class
Site546	155	WBGene00000614	col-37	ZK863.2	col-37 encodes a cuticle collagen.	COLlagen
Site305	112	WBGene00006439	ant-1.1	T27E9.1	ant-1.1 encodes one of four C. elegans mitochondrial adenine Concise description: ant-1.1 encodes one of four C. elegans mitochondrial adenine nucleotide transporters; by homology, ANT-1.1 is predicted to facilitate ADP/ATP exchange between the cytosol and mitochondria; ant-1.1 is an essential gene, required for embryogenesis as well as for normal postembryonic body size and adult lifespan; in ad…	Adenine Nucleotide Translocator
Site502	64	WBGene00018900	rod-1	F55G1.4	rod-1 encodes a novel protein that is orthologous to the Drosophila Concise description: rod-1 encodes a novel protein that is orthologous to the Drosophila Rough Deal and mammalian KNTC1 kinetochore components; in C. elegans, ROD-1 functions as part of the RZZ (Rod/Zw10/Zwilch) complex that regulates microtubule attachment to the kinetochores; ROD-1 physically interacts with, and negatively regu…	ROD (Drosophila RoughDeal) homolog
Site344	55	WBGene00004469	rps-0	B0393.1	rps-0 encodes a small ribosomal subunit SA protein that appears Concise description: rps-0 encodes a small ribosomal subunit SA protein that appears to function as both a ribosomal component and a laminin receptor; by homology, RPS-0 is predicted to play roles in protein biosynthesis and cell adhesion; in C. elegans, RPS-0 activity is required for embryonic and germline development, vulval morpho…	Ribosomal Protein, Small subunit
Site403	53	WBGene00010556	rack-1	K04D7.1	rack-1 encodes a seven-WD repeat-containing protein that is Concise description: rack-1 encodes a seven-WD repeat-containing protein that is the C. elegans ortholog of vertebrate Receptor for Activated C Kinase (Rack1); rack-1 is required cell autonomously for VD/DD motor axon pathfinding; rack-1 is also required for gonadal distal tip cell migration and for normal brood sizes; genetic analyses i…	RACK1 (mammalian Receptor of Activated C Kinase) homolog
Site185	52	WBGene00002957	let-858	F33A8.1	let-858 encodes nucampholin, a highly conserved protein rich Concise description: let-858 encodes nucampholin, a highly conserved protein rich in acidic and basic residues that also shares some similarity to eukaryotic initiation factor eIF-4 gamma; LET-858 is required for early embryogenesis and tissue differentiation and is expressed ubiquitously throughout development; LET-858 localizes to nuc…	LEThal
Site368	39	WBGene00001168	eef-1A.1	F31E3.5	eef-1A.1 encodes a translation elongation factor 1-alpha homolog Concise description: eef-1A.1 encodes a translation elongation factor 1-alpha homolog that is required for embryonic viability, fertility, and germline maintenance; EEF-1A.1	Eukaryotic translation Elongation Factor
Site72	36	WBGene00004415	rpl-4	B0041.4	rpl-4 encodes a large ribosomal subunit L4 protein.	Ribosomal Protein, Large subunit
Site269	35	WBGene00009783	rer-1	F46C5.8	none available	RER (Retention in Endoplasmic Reticulum) homolog
Site619	32	WBGene00006309	sul-2	D1014.1	sul-2 is orthologous to the human gene ARYLSULFATASE A (ARSA; Concise description: sul-2 is orthologous to the human gene ARYLSULFATASE A (ARSA;	SULfatase domain protein
Site322	30	WBGene00004414	rpl-3	F13B10.2	rpl-3 encodes a large ribosomal subunit L3 protein required Concise description: rpl-3 encodes a large ribosomal subunit L3 protein required in mass RNAi assays for embryonic and larval viability, fertility, and general health; the rpl-3 transcription unit has a nonsense transcript that is up-regulated in vivo by smg[-] mutations, indicating that rpl-3 is a natural substrate for SMG-mediated nons…	Ribosomal Protein, Large subunit
Site366	29	WBGene00001168	eef-1A.1	F31E3.5	eef-1A.1 encodes a translation elongation factor 1-alpha homolog Concise description: eef-1A.1 encodes a translation elongation factor 1-alpha homolog that is required for embryonic viability, fertility, and germline maintenance; EEF-1A.1	Eukaryotic translation Elongation Factor
Site458	27	WBGene00004430	rpl-18	Y45F10D.12	rpl-18 encodes a large ribosomal subunit L18 protein.	Ribosomal Protein, Large subunit
Site539	27	WBGene00008920	eef-1G	F17C11.9	none available	Eukaryotic translation Elongation Factor
Site71	26	WBGene00004415	rpl-4	B0041.4	rpl-4 encodes a large ribosomal subunit L4 protein.	Ribosomal Protein, Large subunit
Site242	26	WBGene00017344	F10E7.2	F10E7.2	none available	not known
Site373	26	WBGene00004340	rfc-4	F31E3.3	none available	RFC (DNA replication factor) family
Site608	26	WBGene00020517	hpo-8	T15B7.2	none available	Hypersensitive to POre-forming toxin
Site152	24	WBGene00001167	eef-2	F25H5.4	eef-2 encodes a homolog of translation elongation factor 2 Concise description: eef-2 encodes a homolog of translation elongation factor 2 (EF-2), a GTP-binding protein essential for the elongation phase of protein synthesis; eef-2 is required for embryogenesis and vulval morphogenesis, and is expressed during	Eukaryotic translation Elongation Factor
Site442	24	WBGene00014091	ZK822.4	ZK822.4	none available	not known
Site545	24	WBGene00000614	col-37	ZK863.2	col-37 encodes a cuticle collagen.	COLlagen
Site88	23	WBGene00022033	Y65B4BL.1	Y65B4BL.1	none available	not known
Site194	22	WBGene00000114	alh-8	F13D12.4	alh-8 is orthologous to the human gene METHYLMALONATE-SEMIALDEHYDE Concise description: alh-8 is orthologous to the human gene METHYLMALONATE-SEMIALDEHYDE	ALdehyde deHydrogenase
Site6	21	WBGene00003902	pab-1	Y106G6H.2	pab-1 encodes a polyadenylate-binding protein (i.e., poly(A)-binding Concise description: pab-1 encodes a polyadenylate-binding protein (i.e., poly(A)-binding protein, or PAB); pab-1 is essential for germline proliferation, regulation of adult lifespan, and normal body size; PAB-1 forms a complex with ATX-2, the C. elegans ataxin 2 ortholog, which is also required for germline development; PAB-1 …	PolyA Binding protein
Site236	21	WBGene00002045	icd-1	C56C10.8	icd-1 encodes the C. elegans ortholog of the beta-subunit of Concise description: icd-1 encodes the C. elegans ortholog of the beta-subunit of the nascent polypeptide-associated complex (betaNAC); during development, icd-1 activity is required for prevention of ced-4-dependent, but ced-3-independent, programmed cell death and for normal embryonic development; ICD-1 is widely expressed throughout	Inhibitor of Cell Death
Site404	21	WBGene00010556	rack-1	K04D7.1	rack-1 encodes a seven-WD repeat-containing protein that is Concise description: rack-1 encodes a seven-WD repeat-containing protein that is the C. elegans ortholog of vertebrate Receptor for Activated C Kinase (Rack1); rack-1 is required cell autonomously for VD/DD motor axon pathfinding; rack-1 is also required for gonadal distal tip cell migration and for normal brood sizes; genetic analyses i…	RACK1 (mammalian Receptor of Activated C Kinase) homolog
Site114	20	WBGene00003964	pdi-3	H06O01.1	pdi-3 encodes a protein disulfide isomerase (PDI) required Concise description: pdi-3 encodes a protein disulfide isomerase (PDI) required for normal cuticle collagen deposition and, subliminally, for maintenance of normal body shape; PDI-3 has both PDI and calcium-dependent transglutaminase activity in vitro, crosslinking proteins through a gamma-glutamyl epsilon-lysine dual residue; PDI-3 is ho…	Protein Disulfide Isomerase
Site30	20	WBGene00004489	rps-20	Y105E8A.16	rps-20 encodes a small ribosomal subunit S20 protein.	Ribosomal Protein, Small subunit
Site38	20	WBGene00002978	lev-11	Y105E8B.1	lev-11 encodes tropomyosin, an actin-binding contractile structural Concise description: lev-11 encodes tropomyosin, an actin-binding contractile structural protein orthologous to human TROPOMYOSIN 1 (TPM1; OMIM:191010), which when mutated leads to familial hypertrophic cardiomyopathy; LEV-11 is required for embryonic development, normal body morphology, and locomotion; expressed as multiple tiss…	LEVamisole resistant
Site241	20	WBGene00017344	F10E7.2	F10E7.2	none available	not known
Site384	20	WBGene00019327	zip-2	K02F3.4	zip-2 encodes a bZIP transcription factor; ZIP-2 activity is Concise description: zip-2 encodes a bZIP transcription factor; ZIP-2 activity is required for regulating one branch of the immune response pathway that responds to infection by virulent strains of the bacterial pathogen Pseudomonas aeruginosa; specifically, ZIP-2 is required for inducing expression of a subset of infection response gen…	bZIP transcription factor family
Site324	20	WBGene00004414	rpl-3	F13B10.2	rpl-3 encodes a large ribosomal subunit L3 protein required Concise description: rpl-3 encodes a large ribosomal subunit L3 protein required in mass RNAi assays for embryonic and larval viability, fertility, and general health; the rpl-3 transcription unit has a nonsense transcript that is up-regulated in vivo by smg[-] mutations, indicating that rpl-3 is a natural substrate for SMG-mediated nons…	Ribosomal Protein, Large subunit
Site367	20	WBGene00001168	eef-1A.1	F31E3.5	eef-1A.1 encodes a translation elongation factor 1-alpha homolog Concise description: eef-1A.1 encodes a translation elongation factor 1-alpha homolog that is required for embryonic viability, fertility, and germline maintenance; EEF-1A.1	Eukaryotic translation Elongation Factor
Site151	19	WBGene00001167	eef-2	F25H5.4	eef-2 encodes a homolog of translation elongation factor 2 Concise description: eef-2 encodes a homolog of translation elongation factor 2 (EF-2), a GTP-binding protein essential for the elongation phase of protein synthesis; eef-2 is required for embryogenesis and vulval morphogenesis, and is expressed during	Eukaryotic translation Elongation Factor
Site530	19	WBGene00001396	fat-4	T13F2.1	fat-4 encodes a delta-5 fatty acid desaturase; when expressed Concise description: fat-4 encodes a delta-5 fatty acid desaturase; when expressed heterologously in S. cerevisiae, FAT-4 converts di-homo-gamma-linolenic acid (20:3delta8,11,14) to arachidonic acid (20:4delta5,8,11,14), an important precursor in eicosanoid metabolism, as well as on other fatty acids (C18 to C20); FAT-4 is is required …	FATty acid desaturase
Site531	19	WBGene00001396	fat-4	T13F2.1	fat-4 encodes a delta-5 fatty acid desaturase; when expressed Concise description: fat-4 encodes a delta-5 fatty acid desaturase; when expressed heterologously in S. cerevisiae, FAT-4 converts di-homo-gamma-linolenic acid (20:3delta8,11,14) to arachidonic acid (20:4delta5,8,11,14), an important precursor in eicosanoid metabolism, as well as on other fatty acids (C18 to C20); FAT-4 is is required …	FATty acid desaturase
Site111	18	WBGene00003964	pdi-3	H06O01.1	pdi-3 encodes a protein disulfide isomerase (PDI) required Concise description: pdi-3 encodes a protein disulfide isomerase (PDI) required for normal cuticle collagen deposition and, subliminally, for maintenance of normal body shape; PDI-3 has both PDI and calcium-dependent transglutaminase activity in vitro, crosslinking proteins through a gamma-glutamyl epsilon-lysine dual residue; PDI-3 is ho…	Protein Disulfide Isomerase
Site39	18	WBGene00002978	lev-11	Y105E8B.1	lev-11 encodes tropomyosin, an actin-binding contractile structural Concise description: lev-11 encodes tropomyosin, an actin-binding contractile structural protein orthologous to human TROPOMYOSIN 1 (TPM1; OMIM:191010), which when mutated leads to familial hypertrophic cardiomyopathy; LEV-11 is required for embryonic development, normal body morphology, and locomotion; expressed as multiple tiss…	LEVamisole resistant
Site243	18	WBGene00017344	F10E7.2	F10E7.2	none available	not known
Site360	18	WBGene00004472	rps-3	C23G10.3	rps-3 encodes a small ribosomal subunit S3 protein that contains Concise description: rps-3 encodes a small ribosomal subunit S3 protein that contains a KH RNA-binding domain and by homology,is predicted to function in protein biosynthesis; in C. elegans, RPS-3 activity is required for embryonic and germline development,	Ribosomal Protein, Small subunit
Site296	18	WBGene00000273	brp-1	Y79H2A.1	brp-1 encodes a glutamine-rich protein that is conserved in Concise description: brp-1 encodes a glutamine-rich protein that is conserved in nematodes, but that has no known homologies or sequence motifs; BRP-1 is able to bypass the need for the S. cerevisiae mating pheromone MAP kinase cascade to activate	Bypass of Response to Pheromone in yeast
Site599	18	WBGene00018811	pmt-2	F54D11.1	pmt-2 encodes an experimentally validated N-methyltransferase Concise description: pmt-2 encodes an experimentally validated N-methyltransferase required for phosphocholine biosynthesis and viability; PMT-2 lacks known mammalian orthologs, but has orthologs in parasitic nematodes, fish, amphibians, echinoderms, plants, alveolata, and bacteria; PMT-2 is distantly paralogous to PMT-1; PMT-2 has a s…	Phosphoethanolamine MethylTransferase
Site556	18	WBGene00004767	sel-10	F55B12.3	sel-10 encodes two isoforms of an F-box and WD-repeat-containing Concise description: sel-10 encodes two isoforms of an F-box and WD-repeat-containing protein that is a component of an E3 ubiquitin ligase; SEL-10 functions as a negative regulator of the LIN-12/Notch-like signaling pathway in C. elegans and thus may contribute to cell fate decisions mediated by LIN-12; SEL-10 physically interacts …	Suppressor/Enhancer of Lin-12
Site81	17	WBGene00022456	pfkb-1.1	Y110A7A.6	pfkb-1.1 encodes a 6-phosphofructo-2-kinase/fructose-2,6-bisphosphatase Concise description: pfkb-1.1 encodes a 6-phosphofructo-2-kinase/fructose-2,6-bisphosphatase (EC: 3.1.3.46) paralogous to PFKB-1.2; by homology, PFKB-1.1 is predicted to be a bifunctional enzyme that catalyzes the phosphorylation of fructose 6-phosphate	6-PhosphoFructo-2-Kinase/ fructose-2,6-Bisphosphatase (EC: Gene class description: 6-PhosphoFructo-2-Kinase/ fructose-2,6-Bisphosphatase (EC:
Site129	17	WBGene00011344	T01G9.2	T01G9.2	none available	not known
Site27	17	WBGene00012386	agef-1	Y6B3A.1	agef-1 encodes a putative ARF guanine nucleotide exchange factor Concise description: agef-1 encodes a putative ARF guanine nucleotide exchange factor orthologous to human ARFGEF1 (OMIM:604141) and ARFGEF2 (OMIM:605371); agef-1(RNAi) inhibits CAV-1 body formation in oocytes more severely than arf-1 disruption alone, indicating that activation of both ARF-1 and ARF-3 by AGEF-1 may be required for …	Arf-1 Guanine nucleotide Exchange Factor homolog
Site323	17	WBGene00004414	rpl-3	F13B10.2	rpl-3 encodes a large ribosomal subunit L3 protein required Concise description: rpl-3 encodes a large ribosomal subunit L3 protein required in mass RNAi assays for embryonic and larval viability, fertility, and general health; the rpl-3 transcription unit has a nonsense transcript that is up-regulated in vivo by smg[-] mutations, indicating that rpl-3 is a natural substrate for SMG-mediated nons…	Ribosomal Protein, Large subunit
Site349	17	WBGene00000229	atp-2	C34E10.6	atp-2 encodes the beta subunit of the soluble, catalytic F1 Concise description: atp-2 encodes the beta subunit of the soluble, catalytic F1 portion of ATP synthase (mitochondrial respiratory chain [MRC] complex V); atp-2 activity is required for embryonic and larval development past the L3 stage, as well as for normal mobility, pharyngeal pumping, defecation, growth rate, and larval lifespan; in…	ATP synthase subunit
Site461	17	WBGene00013307	Y57G11C.9	Y57G11C.9	none available	not known
Site61	16	WBGene00004464	rpn-8	R12E2.3	none available	proteasome Regulatory Particle, Non-ATPase-like
Site154	16	WBGene00001167	eef-2	F25H5.4	eef-2 encodes a homolog of translation elongation factor 2 Concise description: eef-2 encodes a homolog of translation elongation factor 2 (EF-2), a GTP-binding protein essential for the elongation phase of protein synthesis; eef-2 is required for embryogenesis and vulval morphogenesis, and is expressed during	Eukaryotic translation Elongation Factor
Site36	16	WBGene00002978	lev-11	Y105E8B.1	lev-11 encodes tropomyosin, an actin-binding contractile structural Concise description: lev-11 encodes tropomyosin, an actin-binding contractile structural protein orthologous to human TROPOMYOSIN 1 (TPM1; OMIM:191010), which when mutated leads to familial hypertrophic cardiomyopathy; LEV-11 is required for embryonic development, normal body morphology, and locomotion; expressed as multiple tiss…	LEVamisole resistant
Site225	16	WBGene00016415	ampd-1	C34F11.3	none available	Adenosine MonoPhosphate Deaminase homolog
Site259	16	WBGene00004416	rpl-5	F54C9.5	rpl-5 encodes a large ribosomal subunit L5 protein; by homology, Concise description: rpl-5 encodes a large ribosomal subunit L5 protein; by homology, RPL-5 is predicted to function in protein biosynthesis; in C. elegans RPL-5 activity is broadly required for embryonic, larval, germline, and vulval development, as	Ribosomal Protein, Large subunit
Site354	16	WBGene00018963	ucr-1	F56D2.1	none available	Ubiquinol-Cytochrome c oxidoReductase complex
Site500	16	WBGene00018900	rod-1	F55G1.4	rod-1 encodes a novel protein that is orthologous to the Drosophila Concise description: rod-1 encodes a novel protein that is orthologous to the Drosophila Rough Deal and mammalian KNTC1 kinetochore components; in C. elegans, ROD-1 functions as part of the RZZ (Rod/Zw10/Zwilch) complex that regulates microtubule attachment to the kinetochores; ROD-1 physically interacts with, and negatively regu…	ROD (Drosophila RoughDeal) homolog
Site408	16	WBGene00001794	gta-1	K04D7.3	The gta-1 gene encodes an ortholog of the human gene GABAT, Concise description: The gta-1 gene encodes an ortholog of the human gene GABAT,	GABA TransAminase family
Site456	16	WBGene00001394	fat-2	W02A2.1	fat-2 encodes a delta-12 fatty acyl desaturase that increases Concise description: fat-2 encodes a delta-12 fatty acyl desaturase that increases membrane fluidity when expressed in yeast, and that may protect against cold stress; FAT-2's substrate is unknown, but may be acyl-CoA; FAT-2 is required in vivo for normal levels of C18 or C20 polyunsaturated fatty acids (PUFAs); FAT-2 is fully required…	FATty acid desaturase
Site121	15	WBGene00006754	unc-15	F07A5.7	The unc-15 gene encodes a paramyosin ortholog; UNC-15 protein Concise description: The unc-15 gene encodes a paramyosin ortholog; UNC-15 protein physically interacts with MHC A, one isoform of myosin heavy chain (MHC) in striated muscle; UNC-15 accumulation is decreased in the absence of UNC-54 (myosin B), implying that degradation of UNC-15 is inhibited by its binding myosin B; conversely, myosin	UNCoordinated
Site153	15	WBGene00001167	eef-2	F25H5.4	eef-2 encodes a homolog of translation elongation factor 2 Concise description: eef-2 encodes a homolog of translation elongation factor 2 (EF-2), a GTP-binding protein essential for the elongation phase of protein synthesis; eef-2 is required for embryogenesis and vulval morphogenesis, and is expressed during	Eukaryotic translation Elongation Factor
Site166	15	WBGene00007301	C04F12.7	C04F12.7	none available	not known
Site240	15	WBGene00017347	F10E7.5	F10E7.5	none available	not known
Site176	15	WBGene00002265	lec-2	F52H3.7	lec-2 encodes a 'tandem repeat' type galectin (beta-galactosyl-binding Concise description: lec-2 encodes a 'tandem repeat' type galectin (beta-galactosyl-binding lectin) containing two, tandemly arranged carbohydrate recognition domains; by homology, LEC-2 may play roles in cell adhesion and aggregation, proliferation, or programmed	gaLECtin
Site365	15	WBGene00000276	byn-1	F57B9.5	byn-1 encodes a homolog of mammalian BYSTIN-LIKE (BYSL; OMIM:603871).	mammalian BYstiN (adhesion protein) related
Site140	14	WBGene00009664	idha-1	F43G9.1	F43G9.1 encodes the C. elegans homolog of the alpha subunit Concise description: F43G9.1 encodes the C. elegans homolog of the alpha subunit of an NAD+-dependent mitochondrial isocitrate dehydrogenase; by homology, the product of F43G9.1 is predicted to catalyze the formation of alpha-ketoglutarate from isocitrate	Isocitrate DeHydrogenase Alpha
Site272	14	WBGene00000170	aqp-2	C01G6.1	aqp-2 encodes, by alternative splicing, two isoforms of an Concise description: aqp-2 encodes, by alternative splicing, two isoforms of an biochemically atypical aquaglyceroporin; when expressed in Xenopus oocytes, AQP-2 increases water permeability 5- to 11-fold, and urea permeability 4.5-fold, but has no effect on glycerol permeability; AQP-2::GFP fusion proteins are expressed predominantly in …	AQuaPorin or aquaglyceroporin related
Site471	14	WBGene00019540	K08D12.6	K08D12.6	none available	not known
Site501	14	WBGene00018900	rod-1	F55G1.4	rod-1 encodes a novel protein that is orthologous to the Drosophila Concise description: rod-1 encodes a novel protein that is orthologous to the Drosophila Rough Deal and mammalian KNTC1 kinetochore components; in C. elegans, ROD-1 functions as part of the RZZ (Rod/Zw10/Zwilch) complex that regulates microtubule attachment to the kinetochores; ROD-1 physically interacts with, and negatively regu…	ROD (Drosophila RoughDeal) homolog
Site57	13	WBGene00004425	rpl-13	C32E8.2	rpl-13 encodes a large ribosomal subunit L13 protein.	Ribosomal Protein, Large subunit
Site118	13	WBGene00008852	ubql-1	F15C11.2	none available	UBiQuiLin
Site156	13	WBGene00001167	eef-2	F25H5.4	eef-2 encodes a homolog of translation elongation factor 2 Concise description: eef-2 encodes a homolog of translation elongation factor 2 (EF-2), a GTP-binding protein essential for the elongation phase of protein synthesis; eef-2 is required for embryogenesis and vulval morphogenesis, and is expressed during	Eukaryotic translation Elongation Factor
Site217	13	WBGene00018969	F56D3.1	F56D3.1	none available	not known
Site247	13	WBGene00017546	rpa-1	F18A1.5	rpa-1 encodes the C. elegans ortholog of the replication protein Concise description: rpa-1 encodes the C. elegans ortholog of the replication protein A (RPA) large subunit; by homology, RPA-1 is predicted to function as a DNA-binding and oligonucleotide oligosaccharide-binding (OB) protein that is required for DNA replication, repair, and recombination; large-scale RNAi screens indicate that rpa…	Replication Protein A homolog
Site334	13	WBGene00006331	sup-26	R10E4.2	sup-26 encodes an RRM domain-containing protein; SUP-26 functions Concise description: sup-26 encodes an RRM domain-containing protein; SUP-26 functions in somatic sex determination via negative regulation of tra-2 translation; SUP-26 binds the tra-2 28-nucleotide repeat element known as the TRA-2/GLI element (TGE), which is located in tra-2 3';untranslated region (UTR); SUP-26 physically interac…	SUPpressor
Site342	13	WBGene00004469	rps-0	B0393.1	rps-0 encodes a small ribosomal subunit SA protein that appears Concise description: rps-0 encodes a small ribosomal subunit SA protein that appears to function as both a ribosomal component and a laminin receptor; by homology, RPS-0 is predicted to play roles in protein biosynthesis and cell adhesion; in C. elegans, RPS-0 activity is required for embryonic and germline development, vulval morpho…	Ribosomal Protein, Small subunit
Site353	13	WBGene00018963	ucr-1	F56D2.1	none available	Ubiquinol-Cytochrome c oxidoReductase complex
Site405	13	WBGene00010556	rack-1	K04D7.1	rack-1 encodes a seven-WD repeat-containing protein that is Concise description: rack-1 encodes a seven-WD repeat-containing protein that is the C. elegans ortholog of vertebrate Receptor for Activated C Kinase (Rack1); rack-1 is required cell autonomously for VD/DD motor axon pathfinding; rack-1 is also required for gonadal distal tip cell migration and for normal brood sizes; genetic analyses i…	RACK1 (mammalian Receptor of Activated C Kinase) homolog
Site418	13	WBGene00002344	let-70	M7.1	let-70 encodes a class I E2 ubiquitin conjugating enzyme; let-70 Concise description: let-70 encodes a class I E2 ubiquitin conjugating enzyme; let-70 was identified in screens for essential genes and phenotypic analyses indicate that loss of let-70 activity results in embryonic and larval lethality with defects in sarcomere assembly; purified LET-70 can stimulate the self-ubiquitylation activiti…	LEThal
Site457	13	WBGene00001394	fat-2	W02A2.1	fat-2 encodes a delta-12 fatty acyl desaturase that increases Concise description: fat-2 encodes a delta-12 fatty acyl desaturase that increases membrane fluidity when expressed in yeast, and that may protect against cold stress; FAT-2's substrate is unknown, but may be acyl-CoA; FAT-2 is required in vivo for normal levels of C18 or C20 polyunsaturated fatty acids (PUFAs); FAT-2 is fully required…	FATty acid desaturase
Site51	12	WBGene00002135	inx-13	Y8G1A.2	inx-13 encodes an innexin, an integral transmembrane channel Concise description: inx-13 encodes an innexin, an integral transmembrane channel protein that is a structural component of invertebrate gap junctions; INX-13 is essential for larval development and osmoregulation, and may be a component of the gap junctions that link the excretory and hypodermal cells; INX-13 is expressed embryonically…	INneXin
Site58	12	WBGene00004425	rpl-13	C32E8.2	rpl-13 encodes a large ribosomal subunit L13 protein.	Ribosomal Protein, Large subunit
Site117	12	WBGene00008852	ubql-1	F15C11.2	none available	UBiQuiLin
Site145	12	WBGene00009453	F36A2.3	F36A2.3	F36A2.3 encodes a protein with similarity to malate dehydrogenase; Concise description: F36A2.3 encodes a protein with similarity to malate dehydrogenase; by homology, the product of F36A2.3 is predicted to function in the citric acid	not known
Site238	12	WBGene00001023	dnj-5	C04A2.7	This gene encodes a protein containing a DnaJ ('J') domain.	DNaJ domain (prokaryotic heat shock protein)
Site180	12	WBGene00008480	eif-2A	E04D5.1	none available	Eukaryotic Initiation Factor
Site189	12	WBGene00009578	F40F8.5	F40F8.5	none available	not known
Site376	12	WBGene00018149	F37C12.1	F37C12.1	none available	not known
Site295	12	WBGene00000273	brp-1	Y79H2A.1	brp-1 encodes a glutamine-rich protein that is conserved in Concise description: brp-1 encodes a glutamine-rich protein that is conserved in nematodes, but that has no known homologies or sequence motifs; BRP-1 is able to bypass the need for the S. cerevisiae mating pheromone MAP kinase cascade to activate	Bypass of Response to Pheromone in yeast
Site301	12	WBGene00000673	col-98	F14F7.1	none available	COLlagen
Site527	12	WBGene00010272	amph-1	F58G6.1	none available	AMPHiphysin homolog
Site407	12	WBGene00001794	gta-1	K04D7.3	The gta-1 gene encodes an ortholog of the human gene GABAT, Concise description: The gta-1 gene encodes an ortholog of the human gene GABAT,	GABA TransAminase family
Site409	12	WBGene00012782	Y43C5A.2	Y43C5A.2	none available	not known
Site427	12	WBGene00008503	F01G4.4	F01G4.4	none available	not known
Site431	12	WBGene00008505	F01G4.6	F01G4.6	none available	not known
Site433	12	WBGene00007105	znf-207	B0035.1	none available	ZiNc Finger protein homolog
Site465	12	WBGene00000708	col-135	M199.5	none available	COLlagen
Site547	12	WBGene00008298	C54D10.3	C54D10.3	none available	not known
Site554	12	WBGene00009983	cut-2	F53F1.5	cut-2 encodes a secreted protein which is a component of cuticlin, Concise description: cut-2 encodes a secreted protein which is a component of cuticlin, the insoluble residue of nematode cuticles; CUT-2 is expressed during all developmental stages and contributes to the external cortical layer of the cuticle of all larval	CUTiclin
Site557	12	WBGene00010260	ddx-17	F58E10.3	none available	DEAD boX helicase homolog
Site590	12	WBGene00004413	rpl-2	B0250.1	rpl-2 encodes a large ribosomal subunit L8 protein.	Ribosomal Protein, Large subunit
Site719	12	WBGene00000216	asp-3	H22K11.1	asp-3 encodes an aspartyl protease homolog that is required, Concise description: asp-3 encodes an aspartyl protease homolog that is required, in parallel with ASP-4 but downstream of CLP-1 and TRA-3, for degenerative (necrotic-like)	ASpartyl Protease
Site48	11	WBGene00020915	nol-58	W01B11.3	none available	NucleOLar protein
Site70	11	WBGene00004415	rpl-4	B0041.4	rpl-4 encodes a large ribosomal subunit L4 protein.	Ribosomal Protein, Large subunit
Site119	11	WBGene00006754	unc-15	F07A5.7	The unc-15 gene encodes a paramyosin ortholog; UNC-15 protein Concise description: The unc-15 gene encodes a paramyosin ortholog; UNC-15 protein physically interacts with MHC A, one isoform of myosin heavy chain (MHC) in striated muscle; UNC-15 accumulation is decreased in the absence of UNC-54 (myosin B), implying that degradation of UNC-15 is inhibited by its binding myosin B; conversely, myosin	UNCoordinated
Site130	11	WBGene00011344	T01G9.2	T01G9.2	none available	not known
Site143	11	WBGene00003052	lmn-1	DY3.2	lmn-1 encodes the sole C. elegans nuclear lamin; lmn-1 is an Concise description: lmn-1 encodes the sole C. elegans nuclear lamin; lmn-1 is an essential gene that is required for a number of nuclear processes, including chromatin organization, cell cycle progression, chromosome segregation, and nuclear pore complex spacing; LMN-1 is also required for nuclear envelope localization of EMR-1/Emerin …	nuclear LaMiN
Site160	11	WBGene00001167	eef-2	F25H5.4	eef-2 encodes a homolog of translation elongation factor 2 Concise description: eef-2 encodes a homolog of translation elongation factor 2 (EF-2), a GTP-binding protein essential for the elongation phase of protein synthesis; eef-2 is required for embryogenesis and vulval morphogenesis, and is expressed during	Eukaryotic translation Elongation Factor
Site4	11	WBGene00003902	pab-1	Y106G6H.2	pab-1 encodes a polyadenylate-binding protein (i.e., poly(A)-binding Concise description: pab-1 encodes a polyadenylate-binding protein (i.e., poly(A)-binding protein, or PAB); pab-1 is essential for germline proliferation, regulation of adult lifespan, and normal body size; PAB-1 forms a complex with ATX-2, the C. elegans ataxin 2 ortholog, which is also required for germline development; PAB-1 …	PolyA Binding protein
Site14	11	WBGene00004408	rla-0	F25H2.10	rpa-0 encodes an acidic ribosomal subunit protein P0.	Ribosomal protein, Large subunit, Acidic (P1)
Site28	11	WBGene00012239	W04A8.4	W04A8.4	none available	not known
Site33	11	WBGene00002978	lev-11	Y105E8B.1	lev-11 encodes tropomyosin, an actin-binding contractile structural Concise description: lev-11 encodes tropomyosin, an actin-binding contractile structural protein orthologous to human TROPOMYOSIN 1 (TPM1; OMIM:191010), which when mutated leads to familial hypertrophic cardiomyopathy; LEV-11 is required for embryonic development, normal body morphology, and locomotion; expressed as multiple tiss…	LEVamisole resistant
Site206	11	WBGene00006924	vig-1	F56D12.5	vig-1 encodes a predicted RNA-binding protein orthologous to Concise description: vig-1 encodes a predicted RNA-binding protein orthologous to Drosophila VIG (Vasa Intronic Gene); vig-1 activity is required for proper function of the let-7 miRNA in vivo and thus, for regulating the transition from late larval to adult cell fates; VIG-1 is a component of the 250 kDa RNA-induced silencing complex (…	VIG (Drosophila Vasa Intronic Gene) ortholog
Site219	11	WBGene00018270	F41C3.4	F41C3.4	none available	not known
Site260	11	WBGene00004416	rpl-5	F54C9.5	rpl-5 encodes a large ribosomal subunit L5 protein; by homology, Concise description: rpl-5 encodes a large ribosomal subunit L5 protein; by homology, RPL-5 is predicted to function in protein biosynthesis; in C. elegans RPL-5 activity is broadly required for embryonic, larval, germline, and vulval development, as	Ribosomal Protein, Large subunit
Site174	11	WBGene00002265	lec-2	F52H3.7	lec-2 encodes a 'tandem repeat' type galectin (beta-galactosyl-binding Concise description: lec-2 encodes a 'tandem repeat' type galectin (beta-galactosyl-binding lectin) containing two, tandemly arranged carbohydrate recognition domains; by homology, LEC-2 may play roles in cell adhesion and aggregation, proliferation, or programmed	gaLECtin
Site202	11	WBGene00000528	clh-1	T27D12.2	clh-1 encodes two CLC-type chloride channels via alternative Concise description: clh-1 encodes two CLC-type chloride channels via alternative splicing, homologous to human CLC1 (OMIM:118425) and CLC2 (OMIM:600570); CLH-1a and CLH-1b are required for maintenance of normal body shape; null mutations of clh-1 cause abnormal alae and a wider body than normal, with the body phenotype	CLC-type chloride cHannel
Site330	11	WBGene00006537	tbb-2	C36E8.5	tbb-2 encodes a homolog of mammalian beta-tubulin (TUBB) that Concise description: tbb-2 encodes a homolog of mammalian beta-tubulin (TUBB) that is expressed at high levels in the germline; TBB-2 is redundant for embryonic viability, due to its paralog TBB-1; however, unlike its paralog TBB-1 it is preferred for normal microtubule severing by the katanin complex MEI-1/MEI-2; TBB-2 is required tog…	TuBulin, Beta
Site331	11	WBGene00006537	tbb-2	C36E8.5	tbb-2 encodes a homolog of mammalian beta-tubulin (TUBB) that Concise description: tbb-2 encodes a homolog of mammalian beta-tubulin (TUBB) that is expressed at high levels in the germline; TBB-2 is redundant for embryonic viability, due to its paralog TBB-1; however, unlike its paralog TBB-1 it is preferred for normal microtubule severing by the katanin complex MEI-1/MEI-2; TBB-2 is required tog…	TuBulin, Beta
Site392	11	WBGene00001385	far-1	F02A9.2	far-1 encodes a fatty acid/retinol binding protein; expressed Concise description: far-1 encodes a fatty acid/retinol binding protein; expressed throughout development with highest expression levels in L3 stage larvae and in	Fatty Acid/Retinol binding protein
Site523	11	WBGene00011856	T20D3.2	T20D3.2	none available	not known
Site436	11	WBGene00014086	ZK809.3	ZK809.3	none available	not known
Site466	11	WBGene00000708	col-135	M199.5	none available	COLlagen
Site476	11	WBGene00002005	hsp-1	F26D10.3	hsp-1 encodes hsp70A, a member of the heat shock family of Concise description: hsp-1 encodes hsp70A, a member of the heat shock family of proteins; hsp70A is closely related to the Drosophila heat inducible hsp70s and the S. cerevisiae SSA hsp70 subfamily; the hsp-1 gene is normally expressed throughout development and upon heat-shock the hsp-1 mRNA is enhanced 2-6 fold; down-regulation of hsp-1…	Heat Shock Protein
Site593	11	WBGene00020955	angl-1	W02G9.5	angl-1 encodes a deadenylase that is orthologous to members Concise description: angl-1 encodes a deadenylase that is orthologous to members	ANGeL-like deadenylase
Site538	11	WBGene00008920	eef-1G	F17C11.9	none available	Eukaryotic translation Elongation Factor
Site586	11	WBGene00000868	cyb-3	T06E6.2	cyb-3 encodes one of four C. elegans cyclin B family members Concise description: cyb-3 encodes one of four C. elegans cyclin B family members that is most closely related to the B3-type cyclins; cyb-3 is required for a number of dynein-related mitotic processes and specifically for initiation of anaphase chromosome segregation; cyb-3 is also required for completion of meiosis II and proper pronu…	CYclin B
Site587	11	WBGene00008677	F11A5.9	F11A5.9	none available	not known
Site684	11	WBGene00020158	T02C5.1	T02C5.1	The T02C5.1 gene encodes a protein that may be involved in Concise description: The T02C5.1 gene encodes a protein that may be involved in apoptosis; it has some similarity to the tumor necrosis factor (TNF) receptor of	not known
Site647	11	WBGene00001502	ftt-2	F52D10.3	ftt-2 encodes a 14-3-3 protein; FTT-2 is required for regulating Concise description: ftt-2 encodes a 14-3-3 protein; FTT-2 is required for regulating the localization of the product of YAP-1, a Yes-associated protein (Yap) homolog,	Fourteen-Three-Three family
Site648	11	WBGene00001502	ftt-2	F52D10.3	ftt-2 encodes a 14-3-3 protein; FTT-2 is required for regulating Concise description: ftt-2 encodes a 14-3-3 protein; FTT-2 is required for regulating the localization of the product of YAP-1, a Yes-associated protein (Yap) homolog,	Fourteen-Three-Three family
Site662	11	WBGene00010605	K06G5.1	K06G5.1	none available	not known
Site112	10	WBGene00003964	pdi-3	H06O01.1	pdi-3 encodes a protein disulfide isomerase (PDI) required Concise description: pdi-3 encodes a protein disulfide isomerase (PDI) required for normal cuticle collagen deposition and, subliminally, for maintenance of normal body shape; PDI-3 has both PDI and calcium-dependent transglutaminase activity in vitro, crosslinking proteins through a gamma-glutamyl epsilon-lysine dual residue; PDI-3 is ho…	Protein Disulfide Isomerase
Site133	10	WBGene00011827	T19A6.1	T19A6.1	none available	not known
Site155	10	WBGene00001167	eef-2	F25H5.4	eef-2 encodes a homolog of translation elongation factor 2 Concise description: eef-2 encodes a homolog of translation elongation factor 2 (EF-2), a GTP-binding protein essential for the elongation phase of protein synthesis; eef-2 is required for embryogenesis and vulval morphogenesis, and is expressed during	Eukaryotic translation Elongation Factor
Site12	10	WBGene00003902	pab-1	Y106G6H.2	pab-1 encodes a polyadenylate-binding protein (i.e., poly(A)-binding Concise description: pab-1 encodes a polyadenylate-binding protein (i.e., poly(A)-binding protein, or PAB); pab-1 is essential for germline proliferation, regulation of adult lifespan, and normal body size; PAB-1 forms a complex with ATX-2, the C. elegans ataxin 2 ortholog, which is also required for germline development; PAB-1 …	PolyA Binding protein
Site37	10	WBGene00002978	lev-11	Y105E8B.1	lev-11 encodes tropomyosin, an actin-binding contractile structural Concise description: lev-11 encodes tropomyosin, an actin-binding contractile structural protein orthologous to human TROPOMYOSIN 1 (TPM1; OMIM:191010), which when mutated leads to familial hypertrophic cardiomyopathy; LEV-11 is required for embryonic development, normal body morphology, and locomotion; expressed as multiple tiss…	LEVamisole resistant
Site278	10	WBGene00002266	lec-3	ZK892.1	none available	gaLECtin
Site173	10	WBGene00002265	lec-2	F52H3.7	lec-2 encodes a 'tandem repeat' type galectin (beta-galactosyl-binding Concise description: lec-2 encodes a 'tandem repeat' type galectin (beta-galactosyl-binding lectin) containing two, tandemly arranged carbohydrate recognition domains; by homology, LEC-2 may play roles in cell adhesion and aggregation, proliferation, or programmed	gaLECtin
Site184	10	WBGene00010333	copz-1	F59E10.3	F59E10.3 encodes a zeta subunit of the coatomer (COPI) complex; Concise description: F59E10.3 encodes a zeta subunit of the coatomer (COPI) complex; in mass RNAi assays, F59E10.3 is required for embryonic, larval, and adult viability,	COat Protein complex 1, Zeta subunit
Site312	10	WBGene00022349	Y82E9BR.17	Y82E9BR.17	none available	not known
Site313	10	WBGene00022349	Y82E9BR.17	Y82E9BR.17	none available	not known
Site347	10	WBGene00000107	alh-1	F54D8.3	alh-1 is orthologous to the human gene ALDEHYDE DEHYDROGENASE Concise description: alh-1 is orthologous to the human gene ALDEHYDE DEHYDROGENASE 2, MITOCHONDRIAL (ALDH2; OMIM:100650), in which a polymorphism can lead to acute	ALdehyde deHydrogenase
Site352	10	WBGene00018963	ucr-1	F56D2.1	none available	Ubiquinol-Cytochrome c oxidoReductase complex
Site362	10	WBGene00020437	stt-3	T12A2.2	none available	STT (yeast oligosaccharyltransferase subunit) homolog
Site377	10	WBGene00004417	rpl-6	R151.3	rpl-6 encodes a large ribosomal subunit L6 protein.	Ribosomal Protein, Large subunit
Site377	10	WBGene00018154	exos-9	F37C12.13	none available	EXOSome (multiexonuclease complex) component
Site378	10	WBGene00004417	rpl-6	R151.3	rpl-6 encodes a large ribosomal subunit L6 protein.	Ribosomal Protein, Large subunit
Site378	10	WBGene00018154	exos-9	F37C12.13	none available	EXOSome (multiexonuclease complex) component
Site399	10	WBGene00007010	alx-1	R10E12.1	alx-1 encodes one of two C. elegans Bro1 domain-containing Concise description: alx-1 encodes one of two C. elegans Bro1 domain-containing proteins; during development, ALX-1 functions in the regulation of protein trafficking via endocytic recycling of clathrin-independent cargo and membrane-protein degradation; ALX-1 physically interacts with RME-1, a component of recycling endosomes that regula…	ALIX (Apoptosis-linked gene 2 interacting protein X) homolog
Site281	10	WBGene00000833	cts-1	T20G5.2	cts-1 encodes a citrate synthase; by homology, CTS-1 is predicted Concise description: cts-1 encodes a citrate synthase; by homology, CTS-1 is predicted to function in the citric acid cycle to catalyze the formation of citrate from oxaloacetate	CiTrate Synthase
Site288	10	WBGene00004736	sca-1	K11D9.2	The sca-1 gene encodes a sarco-endoplasmic reticulum Ca[2+] Concise description: The sca-1 gene encodes a sarco-endoplasmic reticulum Ca[2+] ATPase homolog that is required for development and muscle function; sca-1 is also a ortholog of human ATP2A1 (OMIM:108730), which when mutated leads to Darier-White	SERCA (Sarco-Endoplasmic Reticulum Calcium ATPase)
Site292	10	WBGene00000273	brp-1	Y79H2A.1	brp-1 encodes a glutamine-rich protein that is conserved in Concise description: brp-1 encodes a glutamine-rich protein that is conserved in nematodes, but that has no known homologies or sequence motifs; BRP-1 is able to bypass the need for the S. cerevisiae mating pheromone MAP kinase cascade to activate	Bypass of Response to Pheromone in yeast
Site472	10	WBGene00019540	K08D12.6	K08D12.6	none available	not known
Site479	10	WBGene00016918	test-1	C54E4.2	none available	vertebrate proteoglycan TESTican homolog
Site504	10	WBGene00019900	vdac-1	R05G6.7	none available	VDAC (Voltage Dependent Anion Channel) homolog
Site505	10	WBGene00016845	C50F7.5	C50F7.5	none available	not known
Site428	10	WBGene00008503	F01G4.4	F01G4.4	none available	not known
Site443	10	WBGene00014091	ZK822.4	ZK822.4	none available	not known
Site464	10	WBGene00000708	col-135	M199.5	none available	COLlagen
Site543	10	WBGene00004152	pqn-70	T19B10.4	The protein product of this gene is predicted to contain a Concise description: The protein product of this gene is predicted to contain a glutamine/asparagine (Q/N)-rich ('prion') domain, by the algorithm of Michelitsch	Prion-like-(Q/N-rich)-domain-bearing protein
Site549	10	WBGene00010736	istr-1	K10C8.3	none available	Increased Sodium Tolerance Related
Site558	10	WBGene00010260	ddx-17	F58E10.3	none available	DEAD boX helicase homolog
Site563	10	WBGene00044201	H39E23.3	H39E23.3	none available	not known
Site589	10	WBGene00004413	rpl-2	B0250.1	rpl-2 encodes a large ribosomal subunit L8 protein.	Ribosomal Protein, Large subunit
Site677	10	WBGene00020507	vha-15	T14F9.1	vha-15 encodes an ortholog of subunit H of the cytoplasmic Concise description: vha-15 encodes an ortholog of subunit H of the cytoplasmic (V1) domain of vacuolar proton-translocating ATPase (V-ATPase); VHA-15 and VHA-18 are co-orthologs; VHA-15, along with VHA-2 and probably all V-ATPase subunits, is required for systemic RNAi, probably during endocytotic RNAi uptake; VHA-15 is a	Vacuolar H ATPase
Site687	10	WBGene00006948	wrt-2	F52E4.6	wrt-2 encodes a hedgehog-like protein, with an N-terminal signal Concise description: wrt-2 encodes a hedgehog-like protein, with an N-terminal signal sequence, a Wart domain, and a C-terminal region of low-complexity sequence; WRT-2 is expressed in seam cells and hypodermal syncytia; the Wart domain is predicted to form a cysteine-crosslinked protein involved in intercellular signalling, and it …	WaRThog (hedgehog-like family)
Site645	10	WBGene00007957	C35C5.8	C35C5.8	none available	not known
Site660	10	WBGene00001251	elt-3	K02B9.4	elt-3 gene encodes a GATA transcription factor; during embryogenesis, Concise description: elt-3 gene encodes a GATA transcription factor; during embryogenesis, ELT-3 appears to act downstream of ELT-1, also a GATA transcription factor, in a redundant pathway controlling hypodermal cell differentiation; ELT-3 is also required for positive regulation of transcription of nlp-29, which encodes an an…	Erythroid-Like Transcription factor family
Site46	9	WBGene00004412	rpl-1	Y71F9AL.13	rpl-1 encodes a large ribosomal subunit L10a protein; by homology, Concise description: rpl-1 encodes a large ribosomal subunit L10a protein; by homology, RPL-1 is predicted to function in protein biosynthesis; in C. elegans, RPL-1 activity	Ribosomal Protein, Large subunit
Site49	9	WBGene00002135	inx-13	Y8G1A.2	inx-13 encodes an innexin, an integral transmembrane channel Concise description: inx-13 encodes an innexin, an integral transmembrane channel protein that is a structural component of invertebrate gap junctions; INX-13 is essential for larval development and osmoregulation, and may be a component of the gap junctions that link the excretory and hypodermal cells; INX-13 is expressed embryonically…	INneXin
Site69	9	WBGene00004415	rpl-4	B0041.4	rpl-4 encodes a large ribosomal subunit L4 protein.	Ribosomal Protein, Large subunit
Site90	9	WBGene00001491	frm-4	C24A11.8	frm-4 encodes a predicted transmembrane protein that contains Concise description: frm-4 encodes a predicted transmembrane protein that contains an N-terminal FERM (Band 4.1-ezrin-radixin-moesin) domain; by homology, FRM-4 is predicted to function as a membrane-cytoskeleton linker protein that plays a role in cell adhesion, migration, or organization of cell surface structures; however, as loss o…	FERM domain (protein4.1-ezrin-radixin-moesin) family
Site107	9	WBGene00001075	dpy-14	H27M09.4	dpy-14 encodes a type III (alpha 1) collagen that is required Concise description: dpy-14 encodes a type III (alpha 1) collagen that is required for embryonic, larval, and vulval development, proper amphid morphology, and regulation of body shape and size; a dpy-14 promoter-GFP fusion construct is reportedly expressed	DumPY: shorter than wild-type
Site120	9	WBGene00006754	unc-15	F07A5.7	The unc-15 gene encodes a paramyosin ortholog; UNC-15 protein Concise description: The unc-15 gene encodes a paramyosin ortholog; UNC-15 protein physically interacts with MHC A, one isoform of myosin heavy chain (MHC) in striated muscle; UNC-15 accumulation is decreased in the absence of UNC-54 (myosin B), implying that degradation of UNC-15 is inhibited by its binding myosin B; conversely, myosin	UNCoordinated
Site128	9	WBGene00011344	T01G9.2	T01G9.2	none available	not known
Site5	9	WBGene00003902	pab-1	Y106G6H.2	pab-1 encodes a polyadenylate-binding protein (i.e., poly(A)-binding Concise description: pab-1 encodes a polyadenylate-binding protein (i.e., poly(A)-binding protein, or PAB); pab-1 is essential for germline proliferation, regulation of adult lifespan, and normal body size; PAB-1 forms a complex with ATX-2, the C. elegans ataxin 2 ortholog, which is also required for germline development; PAB-1 …	PolyA Binding protein
Site9	9	WBGene00003902	pab-1	Y106G6H.2	pab-1 encodes a polyadenylate-binding protein (i.e., poly(A)-binding Concise description: pab-1 encodes a polyadenylate-binding protein (i.e., poly(A)-binding protein, or PAB); pab-1 is essential for germline proliferation, regulation of adult lifespan, and normal body size; PAB-1 forms a complex with ATX-2, the C. elegans ataxin 2 ortholog, which is also required for germline development; PAB-1 …	PolyA Binding protein
Site11	9	WBGene00003902	pab-1	Y106G6H.2	pab-1 encodes a polyadenylate-binding protein (i.e., poly(A)-binding Concise description: pab-1 encodes a polyadenylate-binding protein (i.e., poly(A)-binding protein, or PAB); pab-1 is essential for germline proliferation, regulation of adult lifespan, and normal body size; PAB-1 forms a complex with ATX-2, the C. elegans ataxin 2 ortholog, which is also required for germline development; PAB-1 …	PolyA Binding protein
Site34	9	WBGene00002978	lev-11	Y105E8B.1	lev-11 encodes tropomyosin, an actin-binding contractile structural Concise description: lev-11 encodes tropomyosin, an actin-binding contractile structural protein orthologous to human TROPOMYOSIN 1 (TPM1; OMIM:191010), which when mutated leads to familial hypertrophic cardiomyopathy; LEV-11 is required for embryonic development, normal body morphology, and locomotion; expressed as multiple tiss…	LEVamisole resistant
Site35	9	WBGene00002978	lev-11	Y105E8B.1	lev-11 encodes tropomyosin, an actin-binding contractile structural Concise description: lev-11 encodes tropomyosin, an actin-binding contractile structural protein orthologous to human TROPOMYOSIN 1 (TPM1; OMIM:191010), which when mutated leads to familial hypertrophic cardiomyopathy; LEV-11 is required for embryonic development, normal body morphology, and locomotion; expressed as multiple tiss…	LEVamisole resistant
Site209	9	WBGene00019207	fgt-1	H17B01.1	none available	Facilitated Glucose Transporter
Site212	9	WBGene00006647	tsr-1	F53G2.6	tsr-1 encodes a homolog of human transportin-SR, a nuclear Concise description: tsr-1 encodes a homolog of human transportin-SR, a nuclear	Transporter of SR proteins
Site216	9	WBGene00018969	F56D3.1	F56D3.1	none available	not known
Site231	9	WBGene00002054	ifb-2	F10C1.7	ifb-2 encodes an intermediate filament protein; IFB-2 is expressed Concise description: ifb-2 encodes an intermediate filament protein; IFB-2 is expressed exclusively in the intestine and functions as a structural component of the intestinal terminal web; within the terminal web, IFB-2 localizes to a discrete substructure	Intermediate Filament, B
Site198	9	WBGene00001679	gpb-1	F13D12.7	gpb-1 encodes a heterotrimeric G protein beta subunit that Concise description: gpb-1 encodes a heterotrimeric G protein beta subunit that is required during embryonic development for the proper orientation of the mitotic spindle during early cell divisions and thus affects the orientation of early cell division axes, and is also required for larval viability, negatively regulates locomotion and …	G Protein, Beta subunit
Site332	9	WBGene00006537	tbb-2	C36E8.5	tbb-2 encodes a homolog of mammalian beta-tubulin (TUBB) that Concise description: tbb-2 encodes a homolog of mammalian beta-tubulin (TUBB) that is expressed at high levels in the germline; TBB-2 is redundant for embryonic viability, due to its paralog TBB-1; however, unlike its paralog TBB-1 it is preferred for normal microtubule severing by the katanin complex MEI-1/MEI-2; TBB-2 is required tog…	TuBulin, Beta
Site336	9	WBGene00000380	cct-5	C07G2.3	cct-5 encodes, by alternative splicing, two isoforms of a putative Concise description: cct-5 encodes, by alternative splicing, two isoforms of a putative epsilon subunit of the eukaryotic cytosolic ('T complex') chaperonin, orthologous to human CCT5 (OMIM:610150, mutated in sensory neuropathy with spastic paraplegia); CCT-5 represses SKN-1-dependent transcription of gst-4; in mass RNAi assays, c…	Chaperonin Containing TCP-1
Site343	9	WBGene00004469	rps-0	B0393.1	rps-0 encodes a small ribosomal subunit SA protein that appears Concise description: rps-0 encodes a small ribosomal subunit SA protein that appears to function as both a ribosomal component and a laminin receptor; by homology, RPS-0 is predicted to play roles in protein biosynthesis and cell adhesion; in C. elegans, RPS-0 activity is required for embryonic and germline development, vulval morpho…	Ribosomal Protein, Small subunit
Site351	9	WBGene00018963	ucr-1	F56D2.1	none available	Ubiquinol-Cytochrome c oxidoReductase complex
Site361	9	WBGene00004472	rps-3	C23G10.3	rps-3 encodes a small ribosomal subunit S3 protein that contains Concise description: rps-3 encodes a small ribosomal subunit S3 protein that contains a KH RNA-binding domain and by homology,is predicted to function in protein biosynthesis; in C. elegans, RPS-3 activity is required for embryonic and germline development,	Ribosomal Protein, Small subunit
Site374	9	WBGene00023414	R01H2.7	R01H2.7	none available	not known
Site280	9	WBGene00000833	cts-1	T20G5.2	cts-1 encodes a citrate synthase; by homology, CTS-1 is predicted Concise description: cts-1 encodes a citrate synthase; by homology, CTS-1 is predicted to function in the citric acid cycle to catalyze the formation of citrate from oxaloacetate	CiTrate Synthase
Site491	9	WBGene00015280	C01B10.6	C01B10.6	none available	not known
Site494	9	WBGene00004458	rpn-1	T22D1.9	rpn-1 encodes a non-ATPase subunit of the 26S proteasome's Concise description: rpn-1 encodes a non-ATPase subunit of the 26S proteasome's 19S regulatory particle (RP) base subcomplex; rpn-1 activity is essential for embryonic, larval, and germline development; by homology, RPN-1 is predicted to function in unfolding and recognition of protein substrates and/or recycling of ubiquitin moieties	proteasome Regulatory Particle, Non-ATPase-like
Site510	9	WBGene00015509	C06A6.4	C06A6.4	none available	not known
Site522	9	WBGene00012433	Y11D7A.9	Y11D7A.9	none available	not known
Site525	9	WBGene00011856	T20D3.2	T20D3.2	none available	not known
Site533	9	WBGene00001395	fat-3	W08D2.4	fat-3 encodes a delta-6 fatty acid desaturase ('linoleoyl-CoA Concise description: fat-3 encodes a delta-6 fatty acid desaturase ('linoleoyl-CoA desaturase') containing an N-terminal cytochrome b5 domain that is orthologous to the vertebrate fatty acid desaturases (FADS); FAT-3 expressed in yeast uses linoleic and alpha-linolenic acid as substrates; FAT-3 is absolutely required in vivo for synthe…	FATty acid desaturase
Site406	9	WBGene00010556	rack-1	K04D7.1	rack-1 encodes a seven-WD repeat-containing protein that is Concise description: rack-1 encodes a seven-WD repeat-containing protein that is the C. elegans ortholog of vertebrate Receptor for Activated C Kinase (Rack1); rack-1 is required cell autonomously for VD/DD motor axon pathfinding; rack-1 is also required for gonadal distal tip cell migration and for normal brood sizes; genetic analyses i…	RACK1 (mammalian Receptor of Activated C Kinase) homolog
Site420	9	WBGene00011484	T05E11.8	T05E11.8	none available	not known
Site423	9	WBGene00008503	F01G4.4	F01G4.4	none available	not known
Site425	9	WBGene00008503	F01G4.4	F01G4.4	none available	not known
Site426	9	WBGene00008503	F01G4.4	F01G4.4	none available	not known
Site451	9	WBGene00007091	eri-12	B0001.6	none available	Enhanced RNAI (RNA interference)
Site568	9	WBGene00044201	H39E23.3	H39E23.3	none available	not known
Site570	9	WBGene00044201	H39E23.3	H39E23.3	none available	not known
Site579	9	WBGene00009081	F23B12.4	F23B12.4	none available	not known
Site588	9	WBGene00007395	dcar-1	C06H5.7	none available	DihydroCaffeic Acid Receptor
Site718	9	WBGene00003877	pept-1	K04E7.2	pept-1 encodes a low affinity/high capacity oligopeptide transporter; Concise description: pept-1 encodes a low affinity/high capacity oligopeptide transporter; pept-1 is required for uptake of intact peptides from the intestine and thus for normal development, growth, and reproduction; genetic studies indicate that pept-1 interacts with both the daf-2/insulin- and let-363/TOR-signaling pathways …	PEPTide transporter family
Site725	9	WBGene00006063	sto-1	F08C6.4	none available	STOmatin
Site639	9	WBGene00008748	yap-1	F13E6.4	yap-1 encodes a protein with sequence similarity to YAP (yes-associated Concise description: yap-1 encodes a protein with sequence similarity to YAP (yes-associated protein) in its N-terminal TEAD-binding domain and WW domain; YAP-1 plays a role in the response to heat and in determination of adult life span; YAP-1 physically interacts with EGL-44, a transcription enhancer factor of the TEA domai…	Yes-Associated Protein homolog
Site641	9	WBGene00009632	ttyh-1	F42E11.2	none available	TweeTY transmembrane/cell surface protein Homolog
Site85	8	WBGene00022033	Y65B4BL.1	Y65B4BL.1	none available	not known
Site131	8	WBGene00022518	zfh-2	ZC123.3	zfh-2 is a homeobox gene of the ZF (zinc finger class); it Concise description: zfh-2 is a homeobox gene of the ZF (zinc finger class); it encodes three homeodomains and encodes at last 15 zinc fingers; the ZF class is subdivided into several families; zfh-2 belongs to the Zfhx family and is orthologous to Drosophila zfh-2, and the three paralogous human genes ZFHX2, ZFHX3, and ZFHX4 (zinc finger…	Zinc Finger and Homeobox
Site47	8	WBGene00020915	nol-58	W01B11.3	none available	NucleOLar protein
Site53	8	WBGene00002135	inx-13	Y8G1A.2	inx-13 encodes an innexin, an integral transmembrane channel Concise description: inx-13 encodes an innexin, an integral transmembrane channel protein that is a structural component of invertebrate gap junctions; INX-13 is essential for larval development and osmoregulation, and may be a component of the gap junctions that link the excretory and hypodermal cells; INX-13 is expressed embryonically…	INneXin
Site99	8	WBGene00016943	acdh-1	C55B7.4	acdh-1 encodes a short-chain acyl-CoA dehydrogenase; ACDH-1 Concise description: acdh-1 encodes a short-chain acyl-CoA dehydrogenase; ACDH-1 is predicted to be a mitochondrial enzyme that catalyzes the first step of fatty acid beta-oxidation and thus plays a key role in energy production; steady-state acdh-1 mRNA levels are under the control of the MDT-15 mediator complex subunit; in addition, ge…	Acyl CoA DeHydrogenase
Site116	8	WBGene00008852	ubql-1	F15C11.2	none available	UBiQuiLin
Site136	8	WBGene00008648	F10D11.2	F10D11.2	none available	not known
Site163	8	WBGene00001167	eef-2	F25H5.4	eef-2 encodes a homolog of translation elongation factor 2 Concise description: eef-2 encodes a homolog of translation elongation factor 2 (EF-2), a GTP-binding protein essential for the elongation phase of protein synthesis; eef-2 is required for embryogenesis and vulval morphogenesis, and is expressed during	Eukaryotic translation Elongation Factor
Site170	8	WBGene00009164	hrdl-1	F26E4.11	none available	HRD-Like (E3 ubiquitin ligase related)
Site15	8	WBGene00004408	rla-0	F25H2.10	rpa-0 encodes an acidic ribosomal subunit protein P0.	Ribosomal protein, Large subunit, Acidic (P1)
Site20	8	WBGene00011030	R05D7.5	R05D7.5	none available	not known
Site32	8	WBGene00004489	rps-20	Y105E8A.16	rps-20 encodes a small ribosomal subunit S20 protein.	Ribosomal Protein, Small subunit
Site40	8	WBGene00002978	lev-11	Y105E8B.1	lev-11 encodes tropomyosin, an actin-binding contractile structural Concise description: lev-11 encodes tropomyosin, an actin-binding contractile structural protein orthologous to human TROPOMYOSIN 1 (TPM1; OMIM:191010), which when mutated leads to familial hypertrophic cardiomyopathy; LEV-11 is required for embryonic development, normal body morphology, and locomotion; expressed as multiple tiss…	LEVamisole resistant
Site248	8	WBGene00017546	rpa-1	F18A1.5	rpa-1 encodes the C. elegans ortholog of the replication protein Concise description: rpa-1 encodes the C. elegans ortholog of the replication protein A (RPA) large subunit; by homology, RPA-1 is predicted to function as a DNA-binding and oligonucleotide oligosaccharide-binding (OB) protein that is required for DNA replication, repair, and recombination; large-scale RNAi screens indicate that rpa…	Replication Protein A homolog
Site254	8	WBGene00004723	sap-49	C08B11.5	sap-49 encodes the C. elegans ortholog of mammalian SAP49, Concise description: sap-49 encodes the C. elegans ortholog of mammalian SAP49, a component of the SF3b splicing factor, a U2 snRNP-associated protein complex; loss of sap-49 activity via RNAi results in embryonic lethality, a protruding vulva, reduced levels of gene expression (as assessed by a gfp reporter), and early onset of foci form…	Spliceosome-Associated Protein
Site257	8	WBGene00011759	mrps-18B	T13H5.5	none available	Mitochondrial Ribosomal Protein, Small
Site262	8	WBGene00010681	mak-1	K08F8.1	none available	MAP kinase Activated protein Kinase
Site273	8	WBGene00000170	aqp-2	C01G6.1	aqp-2 encodes, by alternative splicing, two isoforms of an Concise description: aqp-2 encodes, by alternative splicing, two isoforms of an biochemically atypical aquaglyceroporin; when expressed in Xenopus oocytes, AQP-2 increases water permeability 5- to 11-fold, and urea permeability 4.5-fold, but has no effect on glycerol permeability; AQP-2::GFP fusion proteins are expressed predominantly in …	AQuaPorin or aquaglyceroporin related
Site191	8	WBGene00004698	rsp-1	W02B12.3	rsp-1 encodes the C. elegans ortholog of the vertebrate SRp75 Concise description: rsp-1 encodes the C. elegans ortholog of the vertebrate SRp75 splicing factor and member of the SR protein family of nuclear phosphoproteins that	SR Protein (splicing factor)
Site201	8	WBGene00012085	T27D12.1	T27D12.1	none available	not known
Site203	8	WBGene00009394	clec-63	F35C5.6	none available	C-type LECtin
Site204	8	WBGene00012608	hphd-1	Y38F1A.6	none available	3-HydroxyPropionate-oxoacid transHyDrogenase
Site385	8	WBGene00019327	zip-2	K02F3.4	zip-2 encodes a bZIP transcription factor; ZIP-2 activity is Concise description: zip-2 encodes a bZIP transcription factor; ZIP-2 activity is required for regulating one branch of the immune response pathway that responds to infection by virulent strains of the bacterial pathogen Pseudomonas aeruginosa; specifically, ZIP-2 is required for inducing expression of a subset of infection response gen…	bZIP transcription factor family
Site390	8	WBGene00020762	zer-1	T24C4.6	zer-1 encodes a protein that contains a VHL (von Hippel-Lindau)-box Concise description: zer-1 encodes a protein that contains a VHL (von Hippel-Lindau)-box motif and is a member of the ZYG11 family of ubiquitin ligase substrate recognition subunits; ZER-1 interacts with the CUL-2 cullin in vivo and modestly enhances the lethality produced by a temperature-sensitive allele of zyg-11; in yeast two…	Zyg Eleven Related
Site319	8	WBGene00004428	rpl-16	M01F1.2	rpl-16 encodes a large ribosomal subunit L13a protein.	Ribosomal Protein, Large subunit
Site370	8	WBGene00001168	eef-1A.1	F31E3.5	eef-1A.1 encodes a translation elongation factor 1-alpha homolog Concise description: eef-1A.1 encodes a translation elongation factor 1-alpha homolog that is required for embryonic viability, fertility, and germline maintenance; EEF-1A.1	Eukaryotic translation Elongation Factor
Site379	8	WBGene00004420	rpl-9	R13A5.8	rpl-9 encodes a large ribosomal subunit L9 protein that affects Concise description: rpl-9 encodes a large ribosomal subunit L9 protein that affects	Ribosomal Protein, Large subunit
Site394	8	WBGene00010130	vha-14	F55H2.2	vha-14 encodes an ortholog of subunit D of the cytoplasmic Concise description: vha-14 encodes an ortholog of subunit D of the cytoplasmic (V1) domain of vacuolar proton-translocating ATPase (V-ATPase); VHA-14 is a predicted	Vacuolar H ATPase
Site282	8	WBGene00000833	cts-1	T20G5.2	cts-1 encodes a citrate synthase; by homology, CTS-1 is predicted Concise description: cts-1 encodes a citrate synthase; by homology, CTS-1 is predicted to function in the citric acid cycle to catalyze the formation of citrate from oxaloacetate	CiTrate Synthase
Site306	8	WBGene00006439	ant-1.1	T27E9.1	ant-1.1 encodes one of four C. elegans mitochondrial adenine Concise description: ant-1.1 encodes one of four C. elegans mitochondrial adenine nucleotide transporters; by homology, ANT-1.1 is predicted to facilitate ADP/ATP exchange between the cytosol and mitochondria; ant-1.1 is an essential gene, required for embryogenesis as well as for normal postembryonic body size and adult lifespan; in ad…	Adenine Nucleotide Translocator
Site310	8	WBGene00010665	K08E3.5	K08E3.5	none available	not known
Site511	8	WBGene00000183	arf-3	F57H12.1	arf-3 encodes a member of the ADP-ribosylation factor related Concise description: arf-3 encodes a member of the ADP-ribosylation factor related	ADP-Ribosylation Factor related
Site514	8	WBGene00015052	clec-52	B0218.8	none available	C-type LECtin
Site516	8	WBGene00006957	wsp-1	C07G1.4	wsp-1 encodes the C. elegans WASP ortholog; when mutated, human Concise description: wsp-1 encodes the C. elegans WASP ortholog; when mutated, human WASP leads to Wiskott-Aldrich syndrome (OMIM:301000); wsp-1 is required for hypodermal cell migration during morphogenesis (ventral enclosure); in a yeast two-hybrid assay WSP-1 physically interacts with WIP-1, the C. elegans WASP-interacting protein…	WASP (actin cytoskeleton modulator) homolog
Site521	8	WBGene00006438	nrfl-1	C01F6.6	nrfl-1encodes, by alternative splicing, five isoforms of an Concise description: nrfl-1encodes, by alternative splicing, five isoforms of an ortholog of Drosophila SIP1 that maintains epithelial integrity via regulation of Moesin activity, and of the human SLC9A3R1 (OMIM:604990), SLC9A3R2 (OMIM:606553), PDZK1 (OMIM:603831), and PDZD3(OMIM:607146) proteins that regulate plasma membrane exchanger a…	NHERF (mammalian Na/H Exchange Regulatory Factor) Like
Site528	8	WBGene00001396	fat-4	T13F2.1	fat-4 encodes a delta-5 fatty acid desaturase; when expressed Concise description: fat-4 encodes a delta-5 fatty acid desaturase; when expressed heterologously in S. cerevisiae, FAT-4 converts di-homo-gamma-linolenic acid (20:3delta8,11,14) to arachidonic acid (20:4delta5,8,11,14), an important precursor in eicosanoid metabolism, as well as on other fatty acids (C18 to C20); FAT-4 is is required …	FATty acid desaturase
Site452	8	WBGene00007091	eri-12	B0001.6	none available	Enhanced RNAI (RNA interference)
Site609	8	WBGene00020517	hpo-8	T15B7.2	none available	Hypersensitive to POre-forming toxin
Site618	8	WBGene00006309	sul-2	D1014.1	sul-2 is orthologous to the human gene ARYLSULFATASE A (ARSA; Concise description: sul-2 is orthologous to the human gene ARYLSULFATASE A (ARSA;	SULfatase domain protein
Site540	8	WBGene00008920	eef-1G	F17C11.9	none available	Eukaryotic translation Elongation Factor
Site562	8	WBGene00044201	H39E23.3	H39E23.3	none available	not known
Site566	8	WBGene00044201	H39E23.3	H39E23.3	none available	not known
Site571	8	WBGene00044201	H39E23.3	H39E23.3	none available	not known
Site573	8	WBGene00044201	H39E23.3	H39E23.3	none available	not known
Site581	8	WBGene00000915	hsp-90	C47E8.5	daf-21 encodes a member of the Hsp90 family of molecular chaperones; Concise description: daf-21 encodes a member of the Hsp90 family of molecular chaperones; DAF-21 activity is required for larval development, negative regulation of dauer larva formation, and a number of specific chemosensory behaviors, such as the response to chemicals and odorants detected by the ASE and AWC sensory neurons; a…	Heat Shock Protein
Site584	8	WBGene00004336	ret-1	W06A7.3	none available	RETiculon protein
Site585	8	WBGene00001852	hil-1	C30G7.1	none available	HIstone H1 Like
Site680	8	WBGene00000004	aat-3	F52H2.2	aat-3 encodes an amino acid transporter catalytic subunit; Concise description: aat-3 encodes an amino acid transporter catalytic subunit; when co-expressed in Xenopus oocytes with the ATG-2 glycoprotein subunit, AAT-3 is able to facilitate amino acid uptake and exchange, showing a relatively high affinity for small and some large neutral amino acids; in addition, AAT-3 is able to covalently asso…	Amino Acid Transporter
Site685	8	WBGene00020160	igcm-3	T02C5.3	igcm-3 encodes protein containing an immunoglobulin-like domain; Concise description: igcm-3 encodes protein containing an immunoglobulin-like domain; loss of igcm-3 activity via RNAi results in a moderate increase in fat content,	ImmunoGlobulin-like Cell adhesion Molecule family
Site714	8	WBGene00002024	hsp-43	C14F11.5	hsp-43 encodes a member of the hsp20 family.	Heat Shock Protein
Site715	8	WBGene00019619	asp-14	K10C2.3	asp-14 encodes an aspartyl protease.	ASpartyl Protease
Site667	8	WBGene00000822	csq-1	F40E10.3	csq-1 encodes a calsequestrin that is required to normal survival Concise description: csq-1 encodes a calsequestrin that is required to normal survival in media containing either excess or deficient Ca[2+], and that also binds UNC-68's intraluminal domain; CSQ-1 binds Ca[2+] in vitro, and is thought to buffer Ca[2+] stores in sarcoplasmic reticulum; CSQ-1 is expressed in bodywall muscle cells fr…	CalSeQuestrin
Site672	8	WBGene00006494	zipt-7.2	H13N06.5	none available	Zrt (ZRT), Irt- (IRT-) like Protein Transporter
Site16	7	WBGene00004418	rpl-7	F53G12.10	rpl-7 encodes a large ribosomal subunit L7 protein required Concise description: rpl-7 encodes a large ribosomal subunit L7 protein required	Ribosomal Protein, Large subunit
Site17	7	WBGene00004418	rpl-7	F53G12.10	rpl-7 encodes a large ribosomal subunit L7 protein required Concise description: rpl-7 encodes a large ribosomal subunit L7 protein required	Ribosomal Protein, Large subunit
Site87	7	WBGene00022033	Y65B4BL.1	Y65B4BL.1	none available	not known
Site45	7	WBGene00000020	abt-2	F12B6.1	abt-2 encodes a predicted ATP-binding cassette (ABC) transporter Concise description: abt-2 encodes a predicted ATP-binding cassette (ABC) transporter that is a member of the ABCA subfamily of transport proteins; ABT-2 is predicted to function as a transmembrane protein that couples energy to transport of various	ABC Transporter family
Site50	7	WBGene00002135	inx-13	Y8G1A.2	inx-13 encodes an innexin, an integral transmembrane channel Concise description: inx-13 encodes an innexin, an integral transmembrane channel protein that is a structural component of invertebrate gap junctions; INX-13 is essential for larval development and osmoregulation, and may be a component of the gap junctions that link the excretory and hypodermal cells; INX-13 is expressed embryonically…	INneXin
Site67	7	WBGene00017004	nrd-1	D1007.7	none available	NRD (yeast Nuclear pre-mRNA Down-regulation) homolog
Site68	7	WBGene00017004	nrd-1	D1007.7	none available	NRD (yeast Nuclear pre-mRNA Down-regulation) homolog
Site82	7	WBGene00001333	erm-1	C01G8.5	erm-1 encodes the C. elegans ortholog of the ERM (Ezrin, Radixin, Concise description: erm-1 encodes the C. elegans ortholog of the ERM (Ezrin, Radixin, Moesin) family of cytoskeletal linkers; ERM-1 activity is required for regulating LET-23/EGFR receptor localization in the vulval cell lineages to effect proper temporal	Ezrin/Radixin/Moesin
Site98	7	WBGene00004924	snt-4	T23H2.2	none available	SyNapTotagmin
Site122	7	WBGene00006754	unc-15	F07A5.7	The unc-15 gene encodes a paramyosin ortholog; UNC-15 protein Concise description: The unc-15 gene encodes a paramyosin ortholog; UNC-15 protein physically interacts with MHC A, one isoform of myosin heavy chain (MHC) in striated muscle; UNC-15 accumulation is decreased in the absence of UNC-54 (myosin B), implying that degradation of UNC-15 is inhibited by its binding myosin B; conversely, myosin	UNCoordinated
Site134	7	WBGene00003596	ngp-1	T19A6.2	none available	Nuclear/nucleolar GTP-binding Protein family
Site150	7	WBGene00014119	ZK858.6	ZK858.6	none available	not known
Site161	7	WBGene00001167	eef-2	F25H5.4	eef-2 encodes a homolog of translation elongation factor 2 Concise description: eef-2 encodes a homolog of translation elongation factor 2 (EF-2), a GTP-binding protein essential for the elongation phase of protein synthesis; eef-2 is required for embryogenesis and vulval morphogenesis, and is expressed during	Eukaryotic translation Elongation Factor
Site1	7	WBGene00003508	mut-16	B0379.3	mut-16 encodes a glutamine/asparagine (Q/N)-rich domain-containing Concise description: mut-16 encodes a glutamine/asparagine (Q/N)-rich domain-containing protein that lacks obvious homologs outside of other nematode species; MUT-16 activity is required for RNA-mediated interference (RNAi), transgene silencing in germ-line and somatic tissues, and for maintaining low levels of transposon mobiliza…	MUTator
Site2	7	WBGene00003508	mut-16	B0379.3	mut-16 encodes a glutamine/asparagine (Q/N)-rich domain-containing Concise description: mut-16 encodes a glutamine/asparagine (Q/N)-rich domain-containing protein that lacks obvious homologs outside of other nematode species; MUT-16 activity is required for RNA-mediated interference (RNAi), transgene silencing in germ-line and somatic tissues, and for maintaining low levels of transposon mobiliza…	MUTator
Site25	7	WBGene00006529	tba-2	C47B2.3	tba-2 encodes an alpha-tubulin.	TuBulin, Alpha
Site26	7	WBGene00006529	tba-2	C47B2.3	tba-2 encodes an alpha-tubulin.	TuBulin, Alpha
Site215	7	WBGene00018969	F56D3.1	F56D3.1	none available	not known
Site220	7	WBGene00018269	acs-11	F41C3.3	none available	fatty Acid CoA Synthetase family
Site221	7	WBGene00019888	btbd-10	R05F9.1	none available	BTB/POZ Domain-containing protein homolog
Site223	7	WBGene00006737	ulp-2	Y38A8.3	none available	Ubiquitin-Like Protease
Site224	7	WBGene00006737	ulp-2	Y38A8.3	none available	Ubiquitin-Like Protease
Site226	7	WBGene00016415	ampd-1	C34F11.3	none available	Adenosine MonoPhosphate Deaminase homolog
Site261	7	WBGene00004440	rpl-26	F28C6.7	rpl-26 encodes a large ribosomal subunit L26 protein; by homology, Concise description: rpl-26 encodes a large ribosomal subunit L26 protein; by homology, RPL-26 is predicted to function in protein biosynthesis; in C. elegans, RPL-26 activity is required for embryonic and germline development and normal rates of postembryonic	Ribosomal Protein, Large subunit
Site171	7	WBGene00002265	lec-2	F52H3.7	lec-2 encodes a 'tandem repeat' type galectin (beta-galactosyl-binding Concise description: lec-2 encodes a 'tandem repeat' type galectin (beta-galactosyl-binding lectin) containing two, tandemly arranged carbohydrate recognition domains; by homology, LEC-2 may play roles in cell adhesion and aggregation, proliferation, or programmed	gaLECtin
Site175	7	WBGene00002265	lec-2	F52H3.7	lec-2 encodes a 'tandem repeat' type galectin (beta-galactosyl-binding Concise description: lec-2 encodes a 'tandem repeat' type galectin (beta-galactosyl-binding lectin) containing two, tandemly arranged carbohydrate recognition domains; by homology, LEC-2 may play roles in cell adhesion and aggregation, proliferation, or programmed	gaLECtin
Site179	7	WBGene00003177	mec-15	T01E8.4	mec-15 encodes an F-box protein with WD repeats; mec-15 is Concise description: mec-15 encodes an F-box protein with WD repeats; mec-15 is required for the proper development and function of the six touch receptor neurons, and thus for response to gentle touch; mec-15 interacts genetically with some alleles of mec-7 and mec-12 which encode an alpha- and beta-tubulin, respectively; MEC-15	MEChanosensory abnormality
Site183	7	WBGene00000293	cap-2	M106.5	The beta subunit of actin capping protein that regulates actin Concise description: The beta subunit of actin capping protein that regulates actin cytoskeleton assembly and establishment of initial asymmetry in the embryo; it is	CAP-z protein
Site389	7	WBGene00021170	arx-4	Y6D11A.2	arx-4 also called as p34Arc encodes a subunit of the actin Concise description: arx-4 also called as p34Arc encodes a subunit of the actin related protein of the conserved Arp2/3 complex, with 60% amino acid similarity with the homologous genes from human (OMIM: 604224); arx-4 is an essential gene as disruption in the expression by RNAi results in embryonic arrest due to ventral enclosure during …	ARp2/3 compleX component
Site328	7	WBGene00006537	tbb-2	C36E8.5	tbb-2 encodes a homolog of mammalian beta-tubulin (TUBB) that Concise description: tbb-2 encodes a homolog of mammalian beta-tubulin (TUBB) that is expressed at high levels in the germline; TBB-2 is redundant for embryonic viability, due to its paralog TBB-1; however, unlike its paralog TBB-1 it is preferred for normal microtubule severing by the katanin complex MEI-1/MEI-2; TBB-2 is required tog…	TuBulin, Beta
Site329	7	WBGene00006537	tbb-2	C36E8.5	tbb-2 encodes a homolog of mammalian beta-tubulin (TUBB) that Concise description: tbb-2 encodes a homolog of mammalian beta-tubulin (TUBB) that is expressed at high levels in the germline; TBB-2 is redundant for embryonic viability, due to its paralog TBB-1; however, unlike its paralog TBB-1 it is preferred for normal microtubule severing by the katanin complex MEI-1/MEI-2; TBB-2 is required tog…	TuBulin, Beta
Site339	7	WBGene00003915	pan-1	M88.6	pan-1 encodes a novel predicted transmembrane protein with Concise description: pan-1 encodes a novel predicted transmembrane protein with extracellular leucine-rich repeats; loss of PAN-1 activity via RNAi results in molting defects and arrested L2-sized larvae, indicating that PAN-1 is required for completion of the larval molts; pan-1 expression is enriched in the germline and upregulated in a…	P-granule Associated Novel protein
Site346	7	WBGene00017826	tag-340	F26F4.4	none available	Temporarily Assigned Gene name
Site363	7	WBGene00020437	stt-3	T12A2.2	none available	STT (yeast oligosaccharyltransferase subunit) homolog
Site372	7	WBGene00001168	eef-1A.1	F31E3.5	eef-1A.1 encodes a translation elongation factor 1-alpha homolog Concise description: eef-1A.1 encodes a translation elongation factor 1-alpha homolog that is required for embryonic viability, fertility, and germline maintenance; EEF-1A.1	Eukaryotic translation Elongation Factor
Site383	7	WBGene00003243	mig-10	F10E9.6	mig-10 encodes proteins that contain, from N- to C-terminus, Concise description: mig-10 encodes proteins that contain, from N- to C-terminus, an RA-like (Ras association) domain, a PH (pleckstrin homology) domain, and a proline-rich motif, and that are homologous to the vertebrate RIAM, lamellopodin, and Grb7, Grb10, and Grb14 cytoplasmic adaptor proteins; during development, mig-10 activity is …	abnormal cell MIGration
Site284	7	WBGene00009653	F43D9.1	F43D9.1	none available	not known
Site468	7	WBGene00019540	K08D12.6	K08D12.6	none available	not known
Site473	7	WBGene00019540	K08D12.6	K08D12.6	none available	not known
Site483	7	WBGene00018898	F55F10.1	F55F10.1	none available	not known
Site486	7	WBGene00020994	W03F8.4	W03F8.4	none available	not known
Site493	7	WBGene00003043	lip-1	C05B10.1	lip-1 encodes a mitogen-activated protein (MAP) kinase phosphatase Concise description: lip-1 encodes a mitogen-activated protein (MAP) kinase phosphatase homologous to the vertebrate dual specificity phosphatase MKP-3; during development, LIP-1 negatively regulates MAP kinase activity to control the extent of germline proliferation and oocyte meiotic cell cycle progression; lip-1 activity is als…	Lateral-signal-Induced Phosphatase
Site496	7	WBGene00004473	rps-4	Y43B11AR.4	rps-4 encodes a small ribosomal subunit S4 protein.	Ribosomal Protein, Small subunit
Site496	7	WBGene00021544	Y43B11AR.3	Y43B11AR.3	none available	not known
Site518	7	WBGene00004993	spp-8	C28C12.5	none available	SaPosin-like Protein family
Site524	7	WBGene00011856	T20D3.2	T20D3.2	none available	not known
Site435	7	WBGene00007514	catp-8	C10C6.6	none available	Cation transporting ATPase
Site438	7	WBGene00002363	let-92	F38H4.9	let-92 encodes a homolog of PP2AC, the catalytic subunit of Concise description: let-92 encodes a homolog of PP2AC, the catalytic subunit of protein phosphatase 2A (PP2A); let-92 was identified genetically in screens for essential genes on chromosome IV; LET-92 may regulate a number of signal transduction pathways as it is required for embryogenesis, larval development, Ras-mediated vulval develo…	LEThal
Site444	7	WBGene00014091	ZK822.4	ZK822.4	none available	not known
Site447	7	WBGene00007091	eri-12	B0001.6	none available	Enhanced RNAI (RNA interference)
Site448	7	WBGene00007091	eri-12	B0001.6	none available	Enhanced RNAI (RNA interference)
Site450	7	WBGene00007091	eri-12	B0001.6	none available	Enhanced RNAI (RNA interference)
Site462	7	WBGene00001558	gdi-1	Y57G11C.10	gdi-1 encodes a member of the Rab GDP dissociation inhibitor Concise description: gdi-1 encodes a member of the Rab GDP dissociation inhibitor (GDI) family with high similarity to Drosophila Gdi; expressed around the pharyngeal,	GDI (RabGDP Dissociation Inhibitor) family
Site610	7	WBGene00017618	F20A1.6	F20A1.6	none available	not known
Site542	7	WBGene00000063	act-1	T04C12.6	act-1 encodes an actin isoform that is required for proper Concise description: act-1 encodes an actin isoform that is required for proper body wall muscle and pharyngeal muscle structures and the motility of animals; actins have highly similar amino acid sequences; ACT-1 is identical to ACT-3; act-1 functions redundantly with two other actin isoforms, act-2 and act-3, to control cytoplasmic	ACTin
Site565	7	WBGene00044201	H39E23.3	H39E23.3	none available	not known
Site567	7	WBGene00044201	H39E23.3	H39E23.3	none available	not known
Site569	7	WBGene00044201	H39E23.3	H39E23.3	none available	not known
Site578	7	WBGene00013025	vha-13	Y49A3A.2	vha-13 encodes an ortholog of subunit A of the cytoplasmic Concise description: vha-13 encodes an ortholog of subunit A of the cytoplasmic (V1) domain of vacuolar proton-translocating ATPase (V-ATPase); VHA-13 is predicted to hydrolyse ATP as part of a cytosolic VHA-12/VHA-13 heterohexamer, whose activity drives the V-ATPase rotor; VHA-13 levels are lowered in mutants with either abnormally low o…	Vacuolar H ATPase
Site580	7	WBGene00009081	F23B12.4	F23B12.4	none available	not known
Site692	7	WBGene00018237	irg-7	F40F4.6	none available	Infection Response Gene
Site705	7	WBGene00000066	act-4	M03F4.2	act-4 encodes an actin isoform that is most similar to act-2 Concise description: act-4 encodes an actin isoform that is most similar to act-2 in amino acid sequence; an act-4 reporter gene is expressed in body wall and vulval	ACTin
Site709	7	WBGene00000149	apl-1	C42D8.8	apl-1 encodes two almost identical isoforms orthologous to Concise description: apl-1 encodes two almost identical isoforms orthologous to human Amyloid precursor protein (APP); although native APL-1 is predicted to be membrane-bound until proteolytically cleaved, neuronal expression of a partial N-terminal extracellular region of APL-1 alone, containing either the E1 or the E2 domain, is suffici…	Amyloid Precursor-Like
Site712	7	WBGene00001803	lite-1	C14F11.3	lite-1 encodes a eight-transmembrane protein that is a member Concise description: lite-1 encodes a eight-transmembrane protein that is a member of the invertebrate family of Gustatory receptors; LITE-1 functions in neurons as an ultraviolet light receptor required for proper avoidance (photophobic) response to short-wavelength light; ectopic expression of LITE-1 in other tissues, namely body wal…	high-energy LIghT unrEsponsive
Site721	7	WBGene00016894	C53B7.3	C53B7.3	none available	not known
Site730	7	WBGene00023491	tsp-21	C17G1.8	none available	TetraSPanin family
Site635	7	WBGene00001331	erd-2	F09B9.3	erd-2 encodes a protein with homology to human ER lumen protein Concise description: erd-2 encodes a protein with homology to human ER lumen protein	ERD (yeast endoplasmic reticulum retention defective) related
Site649	7	WBGene00001502	ftt-2	F52D10.3	ftt-2 encodes a 14-3-3 protein; FTT-2 is required for regulating Concise description: ftt-2 encodes a 14-3-3 protein; FTT-2 is required for regulating the localization of the product of YAP-1, a Yes-associated protein (Yap) homolog,	Fourteen-Three-Three family
Site673	7	WBGene00007261	lron-3	C02C6.3	none available	eLRR (extracellular Leucine-Rich Repeat) ONly
Site78	6	WBGene00022036	Y65B4BL.4	Y65B4BL.4	none available	not known
Site86	6	WBGene00022033	Y65B4BL.1	Y65B4BL.1	none available	not known
Site42	6	WBGene00001196	egl-30	M01D7.7	egl-30 encodes an ortholog of the heterotrimeric G protein Concise description: egl-30 encodes an ortholog of the heterotrimeric G protein alpha subunit Gq (Gq/G11 class) that affects viability, locomotion, egg laying, synaptic transmission, and pharyngeal pumping; it genetically interacts with the goa-1 pathway, and is probably expressed ubiquitously, with highest expression in	EGg Laying defective
Site52	6	WBGene00002135	inx-13	Y8G1A.2	inx-13 encodes an innexin, an integral transmembrane channel Concise description: inx-13 encodes an innexin, an integral transmembrane channel protein that is a structural component of invertebrate gap junctions; INX-13 is essential for larval development and osmoregulation, and may be a component of the gap junctions that link the excretory and hypodermal cells; INX-13 is expressed embryonically…	INneXin
Site56	6	WBGene00004425	rpl-13	C32E8.2	rpl-13 encodes a large ribosomal subunit L13 protein.	Ribosomal Protein, Large subunit
Site60	6	WBGene00018764	F53F10.2	F53F10.2	none available	not known
Site73	6	WBGene00004415	rpl-4	B0041.4	rpl-4 encodes a large ribosomal subunit L4 protein.	Ribosomal Protein, Large subunit
Site75	6	WBGene00019770	M04F3.4	M04F3.4	none available	not known
Site77	6	WBGene00003934	pat-10	F54C1.7	pat-10 encodes body wall muscle troponin C, the calcium-binding Concise description: pat-10 encodes body wall muscle troponin C, the calcium-binding component of the troponin complex of actin thin filaments; PAT-10 is essential for muscle contraction and thus for completion of embryonic morphogenesis and elongation; by homology, PAT-10 likely functions to regulate body wall muscle contraction in …	Paralysed Arrest at Two-fold
Site83	6	WBGene00001333	erm-1	C01G8.5	erm-1 encodes the C. elegans ortholog of the ERM (Ezrin, Radixin, Concise description: erm-1 encodes the C. elegans ortholog of the ERM (Ezrin, Radixin, Moesin) family of cytoskeletal linkers; ERM-1 activity is required for regulating LET-23/EGFR receptor localization in the vulval cell lineages to effect proper temporal	Ezrin/Radixin/Moesin
Site94	6	WBGene00022748	oaz-1	ZK484.1	none available	Ornithine decarboxylase AntiZyme
Site97	6	WBGene00017816	hrpk-1	F26B1.2	none available	Heterogeneous nuclear RibonucleoProtein (HnRNP) K homolog
Site100	6	WBGene00016943	acdh-1	C55B7.4	acdh-1 encodes a short-chain acyl-CoA dehydrogenase; ACDH-1 Concise description: acdh-1 encodes a short-chain acyl-CoA dehydrogenase; ACDH-1 is predicted to be a mitochondrial enzyme that catalyzes the first step of fatty acid beta-oxidation and thus plays a key role in energy production; steady-state acdh-1 mRNA levels are under the control of the MDT-15 mediator complex subunit; in addition, ge…	Acyl CoA DeHydrogenase
Site106	6	WBGene00001056	dpf-3	K02F2.1	none available	Dipeptidyl Peptidase Four (IV) family
Site108	6	WBGene00020398	cerk-1	T10B11.2	none available	CERamide Kinase related
Site113	6	WBGene00003964	pdi-3	H06O01.1	pdi-3 encodes a protein disulfide isomerase (PDI) required Concise description: pdi-3 encodes a protein disulfide isomerase (PDI) required for normal cuticle collagen deposition and, subliminally, for maintenance of normal body shape; PDI-3 has both PDI and calcium-dependent transglutaminase activity in vitro, crosslinking proteins through a gamma-glutamyl epsilon-lysine dual residue; PDI-3 is ho…	Protein Disulfide Isomerase
Site115	6	WBGene00008852	ubql-1	F15C11.2	none available	UBiQuiLin
Site127	6	WBGene00008311	rskn-2	C54G4.1	none available	RSK-pNinety (RSK-p90 kinase) homolog
Site135	6	WBGene00011828	nepr-1	T19A6.3	spo-7 encodes a transmembrane protein that is the C. elegans Concise description: spo-7 encodes a transmembrane protein that is the C. elegans homolog of fungal Spo7p and mammalian TMEM188; by homology, SPO-7 is predicted to reside in the endoplasmic reticulum membrane in a complex with SCPL-2 that functions to dephosphorylate the phosphatidic acid phosphatase LPIN-1 and thus regulate phospholipi…	Nuclear Envelope Phosphatase Regulator
Site138	6	WBGene00011033	R05D11.5	R05D11.5	none available	not known
Site147	6	WBGene00009454	F36A2.7	F36A2.7	none available	not known
Site148	6	WBGene00001574	gei-17	W10D5.3	gei-17 encodes a SUMO E3 ligase; during embryonic development, Concise description: gei-17 encodes a SUMO E3 ligase; during embryonic development, GEI-17 activity is required for maintaining normal levels of the DNA polymerase eta POLH-1, and hence checkpoint silencing, in embryos exposed to DNA damage; gei-17 mutations affect embryonic viability, vulval development, and body morphology; in vitro…	GEX Interacting protein
Site149	6	WBGene00001574	gei-17	W10D5.3	gei-17 encodes a SUMO E3 ligase; during embryonic development, Concise description: gei-17 encodes a SUMO E3 ligase; during embryonic development, GEI-17 activity is required for maintaining normal levels of the DNA polymerase eta POLH-1, and hence checkpoint silencing, in embryos exposed to DNA damage; gei-17 mutations affect embryonic viability, vulval development, and body morphology; in vitro…	GEX Interacting protein
Site157	6	WBGene00001167	eef-2	F25H5.4	eef-2 encodes a homolog of translation elongation factor 2 Concise description: eef-2 encodes a homolog of translation elongation factor 2 (EF-2), a GTP-binding protein essential for the elongation phase of protein synthesis; eef-2 is required for embryogenesis and vulval morphogenesis, and is expressed during	Eukaryotic translation Elongation Factor
Site158	6	WBGene00001167	eef-2	F25H5.4	eef-2 encodes a homolog of translation elongation factor 2 Concise description: eef-2 encodes a homolog of translation elongation factor 2 (EF-2), a GTP-binding protein essential for the elongation phase of protein synthesis; eef-2 is required for embryogenesis and vulval morphogenesis, and is expressed during	Eukaryotic translation Elongation Factor
Site159	6	WBGene00001167	eef-2	F25H5.4	eef-2 encodes a homolog of translation elongation factor 2 Concise description: eef-2 encodes a homolog of translation elongation factor 2 (EF-2), a GTP-binding protein essential for the elongation phase of protein synthesis; eef-2 is required for embryogenesis and vulval morphogenesis, and is expressed during	Eukaryotic translation Elongation Factor
Site0	6	WBGene00008666	F10G8.8	F10G8.8	none available	not known
Site7	6	WBGene00003902	pab-1	Y106G6H.2	pab-1 encodes a polyadenylate-binding protein (i.e., poly(A)-binding Concise description: pab-1 encodes a polyadenylate-binding protein (i.e., poly(A)-binding protein, or PAB); pab-1 is essential for germline proliferation, regulation of adult lifespan, and normal body size; PAB-1 forms a complex with ATX-2, the C. elegans ataxin 2 ortholog, which is also required for germline development; PAB-1 …	PolyA Binding protein
Site8	6	WBGene00003902	pab-1	Y106G6H.2	pab-1 encodes a polyadenylate-binding protein (i.e., poly(A)-binding Concise description: pab-1 encodes a polyadenylate-binding protein (i.e., poly(A)-binding protein, or PAB); pab-1 is essential for germline proliferation, regulation of adult lifespan, and normal body size; PAB-1 forms a complex with ATX-2, the C. elegans ataxin 2 ortholog, which is also required for germline development; PAB-1 …	PolyA Binding protein
Site10	6	WBGene00003902	pab-1	Y106G6H.2	pab-1 encodes a polyadenylate-binding protein (i.e., poly(A)-binding Concise description: pab-1 encodes a polyadenylate-binding protein (i.e., poly(A)-binding protein, or PAB); pab-1 is essential for germline proliferation, regulation of adult lifespan, and normal body size; PAB-1 forms a complex with ATX-2, the C. elegans ataxin 2 ortholog, which is also required for germline development; PAB-1 …	PolyA Binding protein
Site13	6	WBGene00009119	ndk-1	F25H2.5	none available	Nucleoside Diphosphate Kinase
Site18	6	WBGene00043056	nfya-2	Y53H1A.5	none available	Nuclear transcription Factor Y, A (alpha) subunit
Site21	6	WBGene00010419	atp-1	H28O16.1	H28O16.1 encodes the C. elegans ortholog of the alpha subunit Concise description: H28O16.1 encodes the C. elegans ortholog of the alpha subunit	ATP synthase subunit
Site23	6	WBGene00010419	atp-1	H28O16.1	H28O16.1 encodes the C. elegans ortholog of the alpha subunit Concise description: H28O16.1 encodes the C. elegans ortholog of the alpha subunit	ATP synthase subunit
Site24	6	WBGene00012484	car-1	Y18D10A.17	car-1 encodes a putative RNA-binding protein orthologous to Concise description: car-1 encodes a putative RNA-binding protein orthologous to budding yeast Scd6p, fission yeast Sum2p, Drosophila TRAL, and human LSM14A and LSM14B; CAR-1 inhibits physiological apoptosis in oocytes, keeping it down to a normal level of ~50% in hermaphrodite gonads; independently of apoptosis, CAR-1 is also required f…	Cytokinesis, Apoptosis, RNA-associated
Site29	6	WBGene00013407	Y63D3A.8	Y63D3A.8	none available	not known
Site213	6	WBGene00017280	usp-39	F09D1.1	none available	Ubiquitin Specific Protease
Site214	6	WBGene00022453	ncap-1	Y110A2AR.3	none available	NeCAP (NECAP) endocytosis associated protein homolog
Site228	6	WBGene00001511	fzy-1	ZK177.6	fzy-1 encodes an ortholog of S. cerevisiae Cdc20p that is required Concise description: fzy-1 encodes an ortholog of S. cerevisiae Cdc20p that is required for the metaphase-to-anaphase transition, the deposition of extra meiotic chromosomes to polar bodies, and postembryonic vulval development; on the basis of orthology, FZY-1 is predicted to regulate anaphase-promoting complex (APC); FZY-1 prote…	FiZzY (CDC20 protein family) homolog
Site233	6	WBGene00004015	phb-2	T24H7.1	phb-2 encodes the C. elegans ortholog of prohibitin PHB2; loss Concise description: phb-2 encodes the C. elegans ortholog of prohibitin PHB2; loss of phb-2 activity via RNAi indicates that phb-2 function is required for mitochondrial organization and morphology and for embryonic, germline, and somatic gonad development; PHB-2, along with prohibitin subunit PHB-1, forms a macromolecular complex th…	mitochondrial ProHiBitin complex
Site239	6	WBGene00001023	dnj-5	C04A2.7	This gene encodes a protein containing a DnaJ ('J') domain.	DNaJ domain (prokaryotic heat shock protein)
Site245	6	WBGene00018474	cnep-1	F45E12.1	cnep-1 encodes a putative serine/threonine phosphatase, orthologous Concise description: cnep-1 encodes a putative serine/threonine phosphatase, orthologous to budding yeast Nem1p and human DULLARD; CNEP-1 is expressed in pharynx and intestine; CNEP-1 is distantly similar to FCP-1 and SCPL-1, -3, and -4; by homology, CNEP-1 is predicted to reside in the endoplasmic reticulum membrane in a complex…	CTD Nuclear Envelope Phosphatase
Site251	6	WBGene00011349	T01H3.3	T01H3.3	none available	not known
Site255	6	WBGene00001840	hel-1	C26D10.2	hel-1 encodes an ortholog of human 56-kD U2AF65 associated Concise description: hel-1 encodes an ortholog of human 56-kD U2AF65 associated protein (UAP56) that is required for exporting mRNAs from the nucleus; unlike animals with RNAi against several other splicing factors, hel-1(RNAi) animals fail to export transgenic GFP mRNA from the nucleus; conversely, hel-1 overexpression is lethal,	HELicase
Site255	6	WBGene00007744	C26D10.3	C26D10.3	none available	not known
Site256	6	WBGene00001840	hel-1	C26D10.2	hel-1 encodes an ortholog of human 56-kD U2AF65 associated Concise description: hel-1 encodes an ortholog of human 56-kD U2AF65 associated protein (UAP56) that is required for exporting mRNAs from the nucleus; unlike animals with RNAi against several other splicing factors, hel-1(RNAi) animals fail to export transgenic GFP mRNA from the nucleus; conversely, hel-1 overexpression is lethal,	HELicase
Site256	6	WBGene00007744	C26D10.3	C26D10.3	none available	not known
Site258	6	WBGene00011759	mrps-18B	T13H5.5	none available	Mitochondrial Ribosomal Protein, Small
Site270	6	WBGene00007685	C18E9.5	C18E9.5	none available	not known
Site275	6	WBGene00014252	ZK1320.2	ZK1320.2	none available	not known
Site172	6	WBGene00002265	lec-2	F52H3.7	lec-2 encodes a 'tandem repeat' type galectin (beta-galactosyl-binding Concise description: lec-2 encodes a 'tandem repeat' type galectin (beta-galactosyl-binding lectin) containing two, tandemly arranged carbohydrate recognition domains; by homology, LEC-2 may play roles in cell adhesion and aggregation, proliferation, or programmed	gaLECtin
Site181	6	WBGene00000656	col-80	C09G5.5	none available	COLlagen
Site181	6	WBGene00007488	dph-2	C09G5.2	dph-2 encodes an ortholog of S. cerevisiae DPH2/YKL191W and Concise description: dph-2 encodes an ortholog of S. cerevisiae DPH2/YKL191W and human DPH2L2 (OMIM:603456); DPH-2 is a putative protein component of diphtamide	DiPHthamide biosynthesis protein
Site182	6	WBGene00000293	cap-2	M106.5	The beta subunit of actin capping protein that regulates actin Concise description: The beta subunit of actin capping protein that regulates actin cytoskeleton assembly and establishment of initial asymmetry in the embryo; it is	CAP-z protein
Site188	6	WBGene00004478	rps-9	F40F8.10	rps-9 encodes a small ribosomal subunit S9 protein.	Ribosomal Protein, Small subunit
Site192	6	WBGene00004698	rsp-1	W02B12.3	rsp-1 encodes the C. elegans ortholog of the vertebrate SRp75 Concise description: rsp-1 encodes the C. elegans ortholog of the vertebrate SRp75 splicing factor and member of the SR protein family of nuclear phosphoproteins that	SR Protein (splicing factor)
Site193	6	WBGene00004468	rpn-12	ZK20.5	rpn-12 is predicted to encode a non-ATPase subunit of the 19S Concise description: rpn-12 is predicted to encode a non-ATPase subunit of the 19S regulatory complex of the proteasome that interacts with NHR-6 in yeast two-hybrid	proteasome Regulatory Particle, Non-ATPase-like
Site196	6	WBGene00001679	gpb-1	F13D12.7	gpb-1 encodes a heterotrimeric G protein beta subunit that Concise description: gpb-1 encodes a heterotrimeric G protein beta subunit that is required during embryonic development for the proper orientation of the mitotic spindle during early cell divisions and thus affects the orientation of early cell division axes, and is also required for larval viability, negatively regulates locomotion and …	G Protein, Beta subunit
Site197	6	WBGene00001679	gpb-1	F13D12.7	gpb-1 encodes a heterotrimeric G protein beta subunit that Concise description: gpb-1 encodes a heterotrimeric G protein beta subunit that is required during embryonic development for the proper orientation of the mitotic spindle during early cell divisions and thus affects the orientation of early cell division axes, and is also required for larval viability, negatively regulates locomotion and …	G Protein, Beta subunit
Site199	6	WBGene00012085	T27D12.1	T27D12.1	none available	not known
Site207	6	WBGene00001971	hmg-1.1	Y48B6A.14	hmg-1.1 encodes a member of the high mobility group (HMG) family Concise description: hmg-1.1 encodes a member of the high mobility group (HMG) family	HMG
Site208	6	WBGene00001971	hmg-1.1	Y48B6A.14	hmg-1.1 encodes a member of the high mobility group (HMG) family Concise description: hmg-1.1 encodes a member of the high mobility group (HMG) family	HMG
Site340	6	WBGene00017328	F10C5.2	F10C5.2	none available	not known
Site341	6	WBGene00017328	F10C5.2	F10C5.2	none available	not known
Site387	6	WBGene00019327	zip-2	K02F3.4	zip-2 encodes a bZIP transcription factor; ZIP-2 activity is Concise description: zip-2 encodes a bZIP transcription factor; ZIP-2 activity is required for regulating one branch of the immune response pathway that responds to infection by virulent strains of the bacterial pathogen Pseudomonas aeruginosa; specifically, ZIP-2 is required for inducing expression of a subset of infection response gen…	bZIP transcription factor family
Site311	6	WBGene00022349	Y82E9BR.17	Y82E9BR.17	none available	not known
Site317	6	WBGene00002915	let-805	H19M22.2	let-805 encodes myotactin, a novel single-transmembrane protein Concise description: let-805 encodes myotactin, a novel single-transmembrane protein containing extracellular fibronectin repeats; genetic analyses indicate that LET-805 is essential for proper association between hypodermal fibrous organelles and the contractile apparatus of muscle cells; LET-805 is expressed in hypodermal cells	LEThal
Site321	6	WBGene00007969	acs-19	C36A4.9	none available	fatty Acid CoA Synthetase family
Site325	6	WBGene00004414	rpl-3	F13B10.2	rpl-3 encodes a large ribosomal subunit L3 protein required Concise description: rpl-3 encodes a large ribosomal subunit L3 protein required in mass RNAi assays for embryonic and larval viability, fertility, and general health; the rpl-3 transcription unit has a nonsense transcript that is up-regulated in vivo by smg[-] mutations, indicating that rpl-3 is a natural substrate for SMG-mediated nons…	Ribosomal Protein, Large subunit
Site327	6	WBGene00007980	C36E8.1	C36E8.1	none available	not known
Site345	6	WBGene00004469	rps-0	B0393.1	rps-0 encodes a small ribosomal subunit SA protein that appears Concise description: rps-0 encodes a small ribosomal subunit SA protein that appears to function as both a ribosomal component and a laminin receptor; by homology, RPS-0 is predicted to play roles in protein biosynthesis and cell adhesion; in C. elegans, RPS-0 activity is required for embryonic and germline development, vulval morpho…	Ribosomal Protein, Small subunit
Site356	6	WBGene00018963	ucr-1	F56D2.1	none available	Ubiquinol-Cytochrome c oxidoReductase complex
Site358	6	WBGene00006727	ubq-1	F25B5.4	none available	UBiQuitin
Site364	6	WBGene00022420	wdr-4	Y102E9.2	none available	WD Repeat protein
Site380	6	WBGene00000846	cup-5	R13A5.1	The cup-5 gene encodes an ortholog of the human mucolipin 1 Concise description: The cup-5 gene encodes an ortholog of the human mucolipin 1 gene; cup-5 is required for viability, endo-lysosomal transport and the normal degradation of lysosomes; cup-5 mutants also show increased cell death, which might be a secondary consequence of lysosomal dysfunction; the inactivation of mrp-4 which is a ABCC …	Coelomocyte UPtake-defective
Site381	6	WBGene00003002	lin-13	C03B8.4	lin-13 encodes a large (2248-residue) nuclear protein with Concise description: lin-13 encodes a large (2248-residue) nuclear protein with multiple zinc fingers of the C2H2 class and a LXCXE retinoblastoma protein-binding motif, that is required for survival through larval development and for negative	abnormal cell LINeage
Site388	6	WBGene00004460	rpn-3	C30C11.2	none available	proteasome Regulatory Particle, Non-ATPase-like
Site393	6	WBGene00004980	spk-1	B0464.5	spk-1 encodes a serine/threonine kinase orthologous to the Concise description: spk-1 encodes a serine/threonine kinase orthologous to the highly conserved serine/arginine-rich protein kinases (SRPKs) that phosphorylate SR proteins, essential components of the pre-mRNA splicing machinery; SPK-1, required for embryogenesis and germline development, can directly bind and phosphorylate RSP-3 (CeSF2/…	SR Protein Kinase
Site400	6	WBGene00007010	alx-1	R10E12.1	alx-1 encodes one of two C. elegans Bro1 domain-containing Concise description: alx-1 encodes one of two C. elegans Bro1 domain-containing proteins; during development, ALX-1 functions in the regulation of protein trafficking via endocytic recycling of clathrin-independent cargo and membrane-protein degradation; ALX-1 physically interacts with RME-1, a component of recycling endosomes that regula…	ALIX (Apoptosis-linked gene 2 interacting protein X) homolog
Site291	6	WBGene00013232	faah-4	Y56A3A.12	none available	Fatty Acid Amide Hydrolase homolog
Site294	6	WBGene00000273	brp-1	Y79H2A.1	brp-1 encodes a glutamine-rich protein that is conserved in Concise description: brp-1 encodes a glutamine-rich protein that is conserved in nematodes, but that has no known homologies or sequence motifs; BRP-1 is able to bypass the need for the S. cerevisiae mating pheromone MAP kinase cascade to activate	Bypass of Response to Pheromone in yeast
Site297	6	WBGene00000273	brp-1	Y79H2A.1	brp-1 encodes a glutamine-rich protein that is conserved in Concise description: brp-1 encodes a glutamine-rich protein that is conserved in nematodes, but that has no known homologies or sequence motifs; BRP-1 is able to bypass the need for the S. cerevisiae mating pheromone MAP kinase cascade to activate	Bypass of Response to Pheromone in yeast
Site302	6	WBGene00000673	col-98	F14F7.1	none available	COLlagen
Site308	6	WBGene00000837	cul-2	ZK520.4	cul-2 encodes an E3 ubiquitin ligase; during development, CUL-2 Concise description: cul-2 encodes an E3 ubiquitin ligase; during development, CUL-2 functions as part of a Cul2-RING ubiquitin-ligase complex that regulates diverse biological processes, such as the initiation of meiotic anaphase II, cytokinesis and mitotic chromosome segregation, embryonic cell fate specification, and sex determina…	CULlin
Site419	6	WBGene00003893	ost-1	C44B12.2	ost-1 encodes the C. elegans ortholog of the conserved basement Concise description: ost-1 encodes the C. elegans ortholog of the conserved basement membrane glycoprotein component osteonectin/SPARC/BM-40; loss of ost-1 function via RNAi indicates that ost-1 activity is required for embryonic and larval development, as well as for normal gut development, body size, and fecundity; an OST-1::GFP re…	OSTeonectin (SPARC) related
Site470	6	WBGene00019540	K08D12.6	K08D12.6	none available	not known
Site485	6	WBGene00001324	eor-1	R11E3.6	eor-1 encodes an ortholog of the human BTB/zinc-finger transcription Concise description: eor-1 encodes an ortholog of the human BTB/zinc-finger transcription factor PLZF (OMIM:176797), which is is found as a retinoic acid receptor alpha (RARA) fusion in acute promyelocytic leukemia (APL); EOR-1 positively regulates RAS/RAF-mediated signalling during excretory system development, as well as RAS/R…	Egl-1 suppressor/DiO uptake defective/raf enhancer
Site488	6	WBGene00003636	nhr-46	C45E5.6	none available	Nuclear Hormone Receptor family
Site497	6	WBGene00004473	rps-4	Y43B11AR.4	rps-4 encodes a small ribosomal subunit S4 protein.	Ribosomal Protein, Small subunit
Site499	6	WBGene00004477	rps-8	F42C5.8	rps-8 encodes a small ribosomal subunit S8 protein; by homology, Concise description: rps-8 encodes a small ribosomal subunit S8 protein; by homology, RPS-8 is predicted to function in protein biosynthesis; in C. elegans, RPS-8 activity	Ribosomal Protein, Small subunit
Site506	6	WBGene00016845	C50F7.5	C50F7.5	none available	not known
Site509	6	WBGene00015509	C06A6.4	C06A6.4	none available	not known
Site512	6	WBGene00018361	F42G8.10	F42G8.10	none available	not known
Site515	6	WBGene00006957	wsp-1	C07G1.4	wsp-1 encodes the C. elegans WASP ortholog; when mutated, human Concise description: wsp-1 encodes the C. elegans WASP ortholog; when mutated, human WASP leads to Wiskott-Aldrich syndrome (OMIM:301000); wsp-1 is required for hypodermal cell migration during morphogenesis (ventral enclosure); in a yeast two-hybrid assay WSP-1 physically interacts with WIP-1, the C. elegans WASP-interacting protein…	WASP (actin cytoskeleton modulator) homolog
Site529	6	WBGene00001396	fat-4	T13F2.1	fat-4 encodes a delta-5 fatty acid desaturase; when expressed Concise description: fat-4 encodes a delta-5 fatty acid desaturase; when expressed heterologously in S. cerevisiae, FAT-4 converts di-homo-gamma-linolenic acid (20:3delta8,11,14) to arachidonic acid (20:4delta5,8,11,14), an important precursor in eicosanoid metabolism, as well as on other fatty acids (C18 to C20); FAT-4 is is required …	FATty acid desaturase
Site532	6	WBGene00001395	fat-3	W08D2.4	fat-3 encodes a delta-6 fatty acid desaturase ('linoleoyl-CoA Concise description: fat-3 encodes a delta-6 fatty acid desaturase ('linoleoyl-CoA desaturase') containing an N-terminal cytochrome b5 domain that is orthologous to the vertebrate fatty acid desaturases (FADS); FAT-3 expressed in yeast uses linoleic and alpha-linolenic acid as substrates; FAT-3 is absolutely required in vivo for synthe…	FATty acid desaturase
Site402	6	WBGene00004254	pxf-1	T14G10.2	none available	PDZ eXchange Factor
Site411	6	WBGene00006779	unc-43	K11E8.1	unc-43 encodes the C. elegans ortholog of type II calcium/calmodulin-dependent Concise description: unc-43 encodes the C. elegans ortholog of type II calcium/calmodulin-dependent protein kinase (CaMKII); unc-43 activity is required for a number of processes, including locomotion, neuronal cell fate specification and regulation of synaptic density, egg laying, defecation, and meiotic maturation; i…	UNCoordinated
Site414	6	WBGene00006779	unc-43	K11E8.1	unc-43 encodes the C. elegans ortholog of type II calcium/calmodulin-dependent Concise description: unc-43 encodes the C. elegans ortholog of type II calcium/calmodulin-dependent protein kinase (CaMKII); unc-43 activity is required for a number of processes, including locomotion, neuronal cell fate specification and regulation of synaptic density, egg laying, defecation, and meiotic maturation; i…	UNCoordinated
Site415	6	WBGene00003064	lpd-8	R10H10.1	lpd-8 encodes a homolog of human and mouse HIRA-interacting Concise description: lpd-8 encodes a homolog of human and mouse HIRA-interacting protein-5; LPD-8 has C-terminal similarity to a domain of NifU observed in thioredoxin-like proteins and domains (COG0694), and is predicted to be mitochondrial on phylogenetic	LiPid Depleted
Site422	6	WBGene00008503	F01G4.4	F01G4.4	none available	not known
Site429	6	WBGene00008503	F01G4.4	F01G4.4	none available	not known
Site430	6	WBGene00008503	F01G4.4	F01G4.4	none available	not known
Site434	6	WBGene00002223	klp-12	T01G1.1	none available	Kinesin-Like Protein
Site446	6	WBGene00007091	eri-12	B0001.6	none available	Enhanced RNAI (RNA interference)
Site467	6	WBGene00000708	col-135	M199.5	none available	COLlagen
Site478	6	WBGene00002005	hsp-1	F26D10.3	hsp-1 encodes hsp70A, a member of the heat shock family of Concise description: hsp-1 encodes hsp70A, a member of the heat shock family of proteins; hsp70A is closely related to the Drosophila heat inducible hsp70s and the S. cerevisiae SSA hsp70 subfamily; the hsp-1 gene is normally expressed throughout development and upon heat-shock the hsp-1 mRNA is enhanced 2-6 fold; down-regulation of hsp-1…	Heat Shock Protein
Site598	6	WBGene00022015	Y61A9LA.3	Y61A9LA.3	none available	not known
Site601	6	WBGene00004104	pqn-13	C14C11.8	The protein product of this gene is predicted to contain a Concise description: The protein product of this gene is predicted to contain a glutamine/asparagine (Q/N)-rich ('prion') domain, by the algorithm of Michelitsch	Prion-like-(Q/N-rich)-domain-bearing protein
Site625	6	WBGene00017881	asp-13	F28A12.4	none available	ASpartyl Protease
Site626	6	WBGene00017881	asp-13	F28A12.4	none available	ASpartyl Protease
Site634	6	WBGene00009772	ztf-7	F46B6.7	none available	Zinc finger putative Transcription Factor family
Site536	6	WBGene00001172	egl-3	C51E3.7	The egl-3 gene encodes a homolog of a mammalian proprotein Concise description: The egl-3 gene encodes a homolog of a mammalian proprotein	EGg Laying defective
Site537	6	WBGene00001747	gsp-1	F29F11.6	none available	GLC7 (yeast Glc Seven) like Phosphatase
Site541	6	WBGene00000065	act-3	T04C12.4	act-3 encodes an invertebrate actin, highly similar to ACT-1, Concise description: act-3 encodes an invertebrate actin, highly similar to ACT-1, ACT-2, and ACT-4, that functions in body wall muscle; act-3 functions with two other action isoforms, act-1 and act-2, to control cytoplasmic microfilament function	ACTin
Site548	6	WBGene00008298	C54D10.3	C54D10.3	none available	not known
Site553	6	WBGene00001137	eat-6	B0365.3	eat-6 encodes an ortholog of the alpha subunit of a sodium/potassium Concise description: eat-6 encodes an ortholog of the alpha subunit of a sodium/potassium ATPase, which in turn affects Na+,K(+)-ATPase activity of membranes by affecting the level of the phosphorylated intermediate of the Na+,K(+)-ATPase; EAT-6 affects relaxation of the pharyngeal muscles, fertility (and thus affects feeding); …	EATing: abnormal pharyngeal pumping
Site559	6	WBGene00010260	ddx-17	F58E10.3	none available	DEAD boX helicase homolog
Site560	6	WBGene00008396	D1086.9	D1086.9	none available	not known
Site572	6	WBGene00044201	H39E23.3	H39E23.3	none available	not known
Site576	6	WBGene00013025	vha-13	Y49A3A.2	vha-13 encodes an ortholog of subunit A of the cytoplasmic Concise description: vha-13 encodes an ortholog of subunit A of the cytoplasmic (V1) domain of vacuolar proton-translocating ATPase (V-ATPase); VHA-13 is predicted to hydrolyse ATP as part of a cytosolic VHA-12/VHA-13 heterohexamer, whose activity drives the V-ATPase rotor; VHA-13 levels are lowered in mutants with either abnormally low o…	Vacuolar H ATPase
Site577	6	WBGene00013025	vha-13	Y49A3A.2	vha-13 encodes an ortholog of subunit A of the cytoplasmic Concise description: vha-13 encodes an ortholog of subunit A of the cytoplasmic (V1) domain of vacuolar proton-translocating ATPase (V-ATPase); VHA-13 is predicted to hydrolyse ATP as part of a cytosolic VHA-12/VHA-13 heterohexamer, whose activity drives the V-ATPase rotor; VHA-13 levels are lowered in mutants with either abnormally low o…	Vacuolar H ATPase
Site582	6	WBGene00000915	hsp-90	C47E8.5	daf-21 encodes a member of the Hsp90 family of molecular chaperones; Concise description: daf-21 encodes a member of the Hsp90 family of molecular chaperones; DAF-21 activity is required for larval development, negative regulation of dauer larva formation, and a number of specific chemosensory behaviors, such as the response to chemicals and odorants detected by the ASE and AWC sensory neurons; a…	Heat Shock Protein
Site681	6	WBGene00000004	aat-3	F52H2.2	aat-3 encodes an amino acid transporter catalytic subunit; Concise description: aat-3 encodes an amino acid transporter catalytic subunit; when co-expressed in Xenopus oocytes with the ATG-2 glycoprotein subunit, AAT-3 is able to facilitate amino acid uptake and exchange, showing a relatively high affinity for small and some large neutral amino acids; in addition, AAT-3 is able to covalently asso…	Amino Acid Transporter
Site682	6	WBGene00020194	T03G6.1	T03G6.1	none available	not known
Site686	6	WBGene00018743	F53B3.5	F53B3.5	F53B3.5 encodes a claudin homolog that may regulate ion channels; Concise description: F53B3.5 encodes a claudin homolog that may regulate ion channels; F53B3.5 is distantly similar to mammalian voltage-dependent calcium channel gamma subunits that are known or suspected to prevent epilepsy in vivo (e.g., stargazin; MGI:1316660); F53B3.5 has no obvious function in mass RNAi assays; claudins are i…	not known
Site688	6	WBGene00006948	wrt-2	F52E4.6	wrt-2 encodes a hedgehog-like protein, with an N-terminal signal Concise description: wrt-2 encodes a hedgehog-like protein, with an N-terminal signal sequence, a Wart domain, and a C-terminal region of low-complexity sequence; WRT-2 is expressed in seam cells and hypodermal syncytia; the Wart domain is predicted to form a cysteine-crosslinked protein involved in intercellular signalling, and it …	WaRThog (hedgehog-like family)
Site689	6	WBGene00001685	gpd-3	K10B3.7	gpd-3 encodes a predicted glyceraldehyde 3-phosphate dehydrogenase Concise description: gpd-3 encodes a predicted glyceraldehyde 3-phosphate dehydrogenase	GPD (Glyceraldehyde 3-Phosphate Dehydrogenase)
Site700	6	WBGene00018533	F47B7.2	F47B7.2	none available	not known
Site701	6	WBGene00018533	F47B7.2	F47B7.2	none available	not known
Site708	6	WBGene00006926	vit-2	C42D8.2	vit-2 encodes the vitellogenin homolog YP170; vit-2 is expressed Concise description: vit-2 encodes the vitellogenin homolog YP170; vit-2 is expressed in the adult hermaphrodite intestine and VIT-2 is secreted into the pseudocoelomic space before being taken up by developing oocytes; vit-2 expression is regulated in a sex-, stage-, and tissue-specific manner by the ELT-2/GATA and MAB-3 transcript…	VITellogenin structural genes (yolk protein genes)
Site713	6	WBGene00001803	lite-1	C14F11.3	lite-1 encodes a eight-transmembrane protein that is a member Concise description: lite-1 encodes a eight-transmembrane protein that is a member of the invertebrate family of Gustatory receptors; LITE-1 functions in neurons as an ultraviolet light receptor required for proper avoidance (photophobic) response to short-wavelength light; ectopic expression of LITE-1 in other tissues, namely body wal…	high-energy LIghT unrEsponsive
Site723	6	WBGene00019351	lron-7	K03A1.2	none available	eLRR (extracellular Leucine-Rich Repeat) ONly
Site726	6	WBGene00001169	eef-1A.2	R03G5.1	eef-1A.2 encodes a translation elongation factor 1-alpha homolog Concise description: eef-1A.2 encodes a translation elongation factor 1-alpha homolog that is required for embryonic viability, fertility, and a normal postembryonic growth rate; eef-1A.2 encodes at least one alternatively spliced coding sequence	Eukaryotic translation Elongation Factor
Site728	6	WBGene00019727	zig-12	M02D8.1	none available	2 (Zwei) IG domain protein
Site636	6	WBGene00003733	nhx-5	F57C7.2	nhx-5 encodes a sodium/proton exchanger expressed intracellularly Concise description: nhx-5 encodes a sodium/proton exchanger expressed intracellularly in many neurons, as well as in the vulC cells of the vulva and the excretory cell; nhx-5 has no obvious phenotype in mass RNAi screens; NHX-5 is thought to prevent intracellular acidification by catalysing the electroneutral exchange of vesicular…	Na/H eXchanger
Site637	6	WBGene00004749	sdn-1	F57C7.3	sdn-1 encodes a homolog of vertebrate syndecan-2, a type I Concise description: sdn-1 encodes a homolog of vertebrate syndecan-2, a type I transmembrane heparan sulfate proteoglycan; by homology, SDN-1 is predicted to play a role in cell-cell and cell-matrix adhesion; loss of sdn-1 activity via RNA-mediated interference (RNAi) indicates that SDN-1 is required for backward locomotion and for norma…	SynDecaN
Site638	6	WBGene00004749	sdn-1	F57C7.3	sdn-1 encodes a homolog of vertebrate syndecan-2, a type I Concise description: sdn-1 encodes a homolog of vertebrate syndecan-2, a type I transmembrane heparan sulfate proteoglycan; by homology, SDN-1 is predicted to play a role in cell-cell and cell-matrix adhesion; loss of sdn-1 activity via RNA-mediated interference (RNAi) indicates that SDN-1 is required for backward locomotion and for norma…	SynDecaN
Site640	6	WBGene00012258	W04G3.5	W04G3.5	none available	not known
Site659	6	WBGene00000282	cah-4	R01E6.3	cah-4 encodes a carbonic anhydrase homolog, which is rather Concise description: cah-4 encodes a carbonic anhydrase homolog, which is rather divergent from other such homologs in C. elegans (with at most 38% identity to any other carbonic anhydrase, in or out of C. elegans); it is individually dispensable for viability and for grossly normal postembryonic morphology, and thus may have a more subt…	Carbonic AnHydrase
Site661	6	WBGene00001251	elt-3	K02B9.4	elt-3 gene encodes a GATA transcription factor; during embryogenesis, Concise description: elt-3 gene encodes a GATA transcription factor; during embryogenesis, ELT-3 appears to act downstream of ELT-1, also a GATA transcription factor, in a redundant pathway controlling hypodermal cell differentiation; ELT-3 is also required for positive regulation of transcription of nlp-29, which encodes an an…	Erythroid-Like Transcription factor family
Site663	6	WBGene00010605	K06G5.1	K06G5.1	none available	not known
Site665	6	WBGene00010605	K06G5.1	K06G5.1	none available	not known
Site666	6	WBGene00000822	csq-1	F40E10.3	csq-1 encodes a calsequestrin that is required to normal survival Concise description: csq-1 encodes a calsequestrin that is required to normal survival in media containing either excess or deficient Ca[2+], and that also binds UNC-68's intraluminal domain; CSQ-1 binds Ca[2+] in vitro, and is thought to buffer Ca[2+] stores in sarcoplasmic reticulum; CSQ-1 is expressed in bodywall muscle cells fr…	CalSeQuestrin
Site668	6	WBGene00006432	tag-53	F33C8.1	tag-53 encodes a protein with high similarity to human Attractin, Concise description: tag-53 encodes a protein with high similarity to human Attractin,	Temporarily Assigned Gene name
Site676	6	WBGene00007068	cTel55X.1	cTel55X.1	none available	not known
Site59	5	WBGene00004143	pqn-59	R119.4	pqn-59 encodes a protein containing a glutamine/asparagine Concise description: pqn-59 encodes a protein containing a glutamine/asparagine (Q/N)-rich domain and similarity to the vertebrate ubiquitin-associated proteins UBAP2 and UBAP2L; microarray experiments indicate that pqn-59 is expressed maternally and embryonically and in situ hybridization studies show that pqn-59 mRNA exhibits strong ger…	Prion-like-(Q/N-rich)-domain-bearing protein
Site19	5	WBGene00004429	rpl-17	Y48G8AL.8	rpl-17 encodes a large ribosomal subunit L17 protein; by homology, Concise description: rpl-17 encodes a large ribosomal subunit L17 protein; by homology, RPL-17 is predicted to function in protein biosynthesis; in C. elegans, RPL-17 activity is required for embryonic and germline development, as well as normal postembryonic	Ribosomal Protein, Large subunit
Site44	5	WBGene00021355	Y37E3.17	Y37E3.17	Y37E3.17 encodes a putative mitochondrial dimethylglycine dehydrogenase Concise description: Y37E3.17 encodes a putative mitochondrial dimethylglycine dehydrogenase orthologous to human DMGDH; studies indicate that the elegans dehydrogenase is a phosphorylcholine (PCho)-modified protein; P-Cho modification of proteins seems to play a developmental role in nematodes, as interfering with it, causes…	not known
Site54	5	WBGene00002135	inx-13	Y8G1A.2	inx-13 encodes an innexin, an integral transmembrane channel Concise description: inx-13 encodes an innexin, an integral transmembrane channel protein that is a structural component of invertebrate gap junctions; INX-13 is essential for larval development and osmoregulation, and may be a component of the gap junctions that link the excretory and hypodermal cells; INX-13 is expressed embryonically…	INneXin
Site55	5	WBGene00004425	rpl-13	C32E8.2	rpl-13 encodes a large ribosomal subunit L13 protein.	Ribosomal Protein, Large subunit
Site62	5	WBGene00003516	nab-1	C43E11.6	nab-1 encodes a PDZ and SAM domain-containing protein that Concise description: nab-1 encodes a PDZ and SAM domain-containing protein that is the sole C. elegans ortholog of the mammalian Neurabin/Spinophilin proteins; by homology, NAB-1 is predicted to interact with F-actin, ZYG-8/Doublecortin and the SAD-1 serine/threonine kinase to regulate interactions between the actin and microtubule networ…	NeurABin
Site63	5	WBGene00021628	Y47D9A.1	Y47D9A.1	none available	not known
Site64	5	WBGene00022473	bet-1	Y119C1B.8	bet-1 encodes a BET-family protein that colocalizes with chromosomes; Concise description: bet-1 encodes a BET-family protein that colocalizes with chromosomes; Bet-family proteins are evolutionarily conserved, have two bromodomains, which recognize acetylated histone; BET-1 functions cell-autonomously; in bet-1 mutants, asymmetry of T-cell division is initially normal but later disrupted, BET-1 …	BET (two bromodomains) family protein
Site65	5	WBGene00004113	pqn-24	D1007.14	The protein product of this gene is predicted to contain a Concise description: The protein product of this gene is predicted to contain a glutamine/asparagine (Q/N)-rich ('prion') domain, by the algorithm of Michelitsch	Prion-like-(Q/N-rich)-domain-bearing protein
Site66	5	WBGene00004436	rpl-24.1	D1007.12	rpl-24.1 encodes a large ribosomal subunit L24 protein.	Ribosomal Protein, Large subunit
Site74	5	WBGene00004415	rpl-4	B0041.4	rpl-4 encodes a large ribosomal subunit L4 protein.	Ribosomal Protein, Large subunit
Site76	5	WBGene00018797	F54D7.2	F54D7.2	none available	not known
Site79	5	WBGene00016258	vha-16	C30F8.2	vha-16 encodes an an ortholog of subunit d of the membrane-bound Concise description: vha-16 encodes an an ortholog of subunit d of the membrane-bound (V0) domain of vacuolar proton-translocating ATPase (V-ATPase); VHA-16 is predicted to mechanically anchor the V-ATPase cytosolic rotor (stalk) to the membrane, while also providing a hub for the V-ATPase transmembrane rotor; vha-16 is expressed in	Vacuolar H ATPase
Site80	5	WBGene00016258	vha-16	C30F8.2	vha-16 encodes an an ortholog of subunit d of the membrane-bound Concise description: vha-16 encodes an an ortholog of subunit d of the membrane-bound (V0) domain of vacuolar proton-translocating ATPase (V-ATPase); VHA-16 is predicted to mechanically anchor the V-ATPase cytosolic rotor (stalk) to the membrane, while also providing a hub for the V-ATPase transmembrane rotor; vha-16 is expressed in	Vacuolar H ATPase
Site84	5	WBGene00001333	erm-1	C01G8.5	erm-1 encodes the C. elegans ortholog of the ERM (Ezrin, Radixin, Concise description: erm-1 encodes the C. elegans ortholog of the ERM (Ezrin, Radixin, Moesin) family of cytoskeletal linkers; ERM-1 activity is required for regulating LET-23/EGFR receptor localization in the vulval cell lineages to effect proper temporal	Ezrin/Radixin/Moesin
Site89	5	WBGene00018864	F55A12.5	F55A12.5	none available	not known
Site91	5	WBGene00017852	F27C1.2	F27C1.2	none available	not known
Site92	5	WBGene00003020	lin-35	C32F10.2	lin-35 encodes the C. elegans retinoblastoma protein (Rb) ortholog; Concise description: lin-35 encodes the C. elegans retinoblastoma protein (Rb) ortholog; lin-35 was first identified in screens for synthetic multivulva (synMuv) genes and as a class B synMuv gene, functions redundantly with class A genes to antagonize Ras signaling and negatively regulate vulval development; in addition, loss of…	abnormal cell LINeage
Site93	5	WBGene00001819	haf-9	ZK484.2	haf-9 encodes a protein similar to the conserved half-type Concise description: haf-9 encodes a protein similar to the conserved half-type ATP-binding cassette (ABC) transporter, TAPL/ABCB9; in elegans, haf-9 along with another TAPL gene, haf-4 is required for the formation of intestinal organelles; haf-9 and haf-4 are required for proper growth, normal brood size and for the normal defecation cy…	HAlF transporter (PGP related)
Site95	5	WBGene00020838	trak-1	T27A3.1	T27A3.1 encodes, by alternative splicing, five isoforms of Concise description: T27A3.1 encodes, by alternative splicing, five isoforms of an ortholog of human TRAK1, HAP1 and TRAK2 and of Drosophila MILTON; T27A3.1 is expressed in some chemosensory neurons (ASK, ASI, ADF, and ASE), phasmid neurons (PHB), and CAN neurons; T27A3.1 is also expressed in pharyngeal muscle, epithelial intestinal cells…	TRAK1 and TRAK2 related
Site96	5	WBGene00020383	tin-44	T09B4.9	none available	Transport to INner mitochondrial membrane (yeast TIM)
Site101	5	WBGene00006607	tre-1	F57B10.7	none available	TREhalase
Site102	5	WBGene00019001	ipgm-1	F57B10.3	ipgm-1 encodes an experimentally confirmed cofactor-independent Concise description: ipgm-1 encodes an experimentally confirmed cofactor-independent phosphoglycerate mutase that is essential for embryonic and larval viability, and for normal body morphology; paradoxically, ipgm-1 is also required for normally short lifespan (in mass RNAi screens for Age phenotypes); IPGM-1 exhibits phosphoglycera…	cofactor-Independent PhosphoGlycerate Mutase homolog
Site103	5	WBGene00022633	ZC581.3	ZC581.3	none available	not known
Site104	5	WBGene00020709	T23B3.1	T23B3.1	none available	not known
Site105	5	WBGene00006819	unc-87	F08B6.4	unc-87 encodes, through alternative splicing, two proteins Concise description: unc-87 encodes, through alternative splicing, two proteins that are required to maintain the structure of myofilaments in body wall muscle cells; UNC-87 proteins resemble the C-terminal repeat region of calponin but have no obvious orthologs outside of nematodes; in vitro, UNC-87 proteins exist as monomers in solution…	UNCoordinated
Site109	5	WBGene00016266	idhg-2	C30F12.7	C30F12.7 encodes the C. elegans homolog of the gamma subunit Concise description: C30F12.7 encodes the C. elegans homolog of the gamma subunit of an NAD+-dependent mitochondrial isocitrate dehydrogenase; by homology, the product of C30F12.7 is predicted to catalyze the formation of alpha-ketoglutarate from isocitrate	Isocitrate DeHydrogenase Gamma
Site110	5	WBGene00003964	pdi-3	H06O01.1	pdi-3 encodes a protein disulfide isomerase (PDI) required Concise description: pdi-3 encodes a protein disulfide isomerase (PDI) required for normal cuticle collagen deposition and, subliminally, for maintenance of normal body shape; PDI-3 has both PDI and calcium-dependent transglutaminase activity in vitro, crosslinking proteins through a gamma-glutamyl epsilon-lysine dual residue; PDI-3 is ho…	Protein Disulfide Isomerase
Site123	5	WBGene00012030	T25G3.3	T25G3.3	T25G3.3 encodes an ortholog of S. cerevisiae NMD3; by orthology, Concise description: T25G3.3 encodes an ortholog of S. cerevisiae NMD3; by orthology, T25G3.3 is predicted to help export large ribosomal subunits from the nucleus to IMB-4; T25G3.3 transcripts are enriched during oogenesis, and T25G3.3 is predicted to be coexpressed in an operon with chs-1; however, there is no obvious connection b…	not known
Site124	5	WBGene00011972	T23G11.7	T23G11.7	none available	not known
Site125	5	WBGene00011232	pck-2	R11A5.4	pck-2 is one of three C. elegans genes that encode proteins Concise description: pck-2 is one of three C. elegans genes that encode proteins with similarity to phosphoenolpyruvate carboxykinase (PEPCK); by similarity, the	Phosphoenolypyruvate CarboxyKinase
Site126	5	WBGene00011232	pck-2	R11A5.4	pck-2 is one of three C. elegans genes that encode proteins Concise description: pck-2 is one of three C. elegans genes that encode proteins with similarity to phosphoenolpyruvate carboxykinase (PEPCK); by similarity, the	Phosphoenolypyruvate CarboxyKinase
Site132	5	WBGene00011827	T19A6.1	T19A6.1	none available	not known
Site137	5	WBGene00008385	D1081.7	D1081.7	none available	not known
Site139	5	WBGene00011034	paxt-1	R05D11.6	none available	PArtner of Xrn-2 (Two)
Site141	5	WBGene00010620	K07A12.1	K07A12.1	none available	not known
Site142	5	WBGene00003953	pbs-7	F39H11.5	pbs-7 encodes a B-type subunit of the 26S proteasome's 20S Concise description: pbs-7 encodes a B-type subunit of the 26S proteasome's 20S protease core particle; by homology, PBS-7 is predicted to function in ATP/ubiquitin-dependent nonlysosomal protein degradation; loss of pbs-7 activity via large-scale RNAi screens indicates that, in C. elegans, PBS-7 is required for normal movement and for em…	Proteasome Beta Subunit
Site144	5	WBGene00006324	sup-17	DY3.7	sup-17 encodes an ADAM protein, an integral membrane disintegrin Concise description: sup-17 encodes an ADAM protein, an integral membrane disintegrin and zinc-activated metalloproteinase, orthologous to Drosophila and mouse KUZBANIAN and the vertebrate ADAM10 proteins; SUP-17 is required maternally for embryonic development and plays a role in LIN-12/Notch-mediated cell signaling required for se…	SUPpressor
Site146	5	WBGene00009451	cids-2	F36A2.1	cids-2 encodes a protein that contains a CTD (C-terminal domain Concise description: cids-2 encodes a protein that contains a CTD (C-terminal domain of RNA Pol II)-interacting domain and that is paralogous to CIDS-1; cids-2 was identified genetically as a suppressor of the SynMuv phenotype produced by lin-15AB(n765), a mutation that results in transposition of the 3'-end cleavage and polyadenylat…	pol II C-terminal Interaction Domain Suppressor
Site162	5	WBGene00001167	eef-2	F25H5.4	eef-2 encodes a homolog of translation elongation factor 2 Concise description: eef-2 encodes a homolog of translation elongation factor 2 (EF-2), a GTP-binding protein essential for the elongation phase of protein synthesis; eef-2 is required for embryogenesis and vulval morphogenesis, and is expressed during	Eukaryotic translation Elongation Factor
Site164	5	WBGene00008780	hxk-1	F14B4.2	none available	HeXoKinase homolog
Site165	5	WBGene00011488	nra-2	T05F1.1	none available	Nicotinic Receptor Associated
Site167	5	WBGene00010488	endu-1	K02A11.3	none available	ENDonuclease, poly(U) specific
Site168	5	WBGene00006352	sur-6	F26E4.1	sur-6 encodes a regulatory (B) subunit of serine/threonine Concise description: sur-6 encodes a regulatory (B) subunit of serine/threonine protein phosphatase 2A (PP2A-B); sur-6 was initially identified in screens for mutations that suppress the Multivulva phenotype produced by an activated let-60/Ras mutation and enhance the vulvaless and larval lethality phenotype of a hypomorphic lin-45/Raf mu…	SUppressor of activated let-60 Ras
Site169	5	WBGene00006528	tba-1	F26E4.8	tba-1 encodes one of nine C. elegans alpha-tubulins; in early Concise description: tba-1 encodes one of nine C. elegans alpha-tubulins; in early embryos, tba-1 is required, partially redundantly with the closely related tba-2, for a number of microtubule-dependent processes and hence, for normal embryonic development; wild-type tba-1 activity is also required for cell migrations as well as motor …	TuBulin, Alpha
Site3	5	WBGene00007706	NA	NA	NA	NA
Site22	5	WBGene00010419	atp-1	H28O16.1	H28O16.1 encodes the C. elegans ortholog of the alpha subunit Concise description: H28O16.1 encodes the C. elegans ortholog of the alpha subunit	ATP synthase subunit
Site31	5	WBGene00004489	rps-20	Y105E8A.16	rps-20 encodes a small ribosomal subunit S20 protein.	Ribosomal Protein, Small subunit
Site41	5	WBGene00002978	lev-11	Y105E8B.1	lev-11 encodes tropomyosin, an actin-binding contractile structural Concise description: lev-11 encodes tropomyosin, an actin-binding contractile structural protein orthologous to human TROPOMYOSIN 1 (TPM1; OMIM:191010), which when mutated leads to familial hypertrophic cardiomyopathy; LEV-11 is required for embryonic development, normal body morphology, and locomotion; expressed as multiple tiss…	LEVamisole resistant
Site210	5	WBGene00001340	etr-1	T01D1.2	etr-1 encodes a muscle-specific ELAV-type RNA-binding protein, Concise description: etr-1 encodes a muscle-specific ELAV-type RNA-binding protein, whose homologs include Drosophila ELAV and human CUG-BINDING PROTEIN (CUGBP1; OMIM:601074); etr-1 function is required for embryonic muscle development, which suggests that ETR-1's homology to CUG-BP (implicated in myotonic dystrophy) might reflect con…	ELAV-Type RNA binding-protein family
Site205	5	WBGene00021973	emc-2	Y57G7A.10	none available	EMC Endoplasmic Membrane protein Complex (yeast EMC) homolog
Site211	5	WBGene00017210	F07E5.5	F07E5.5	none available	not known
Site218	5	WBGene00018969	F56D3.1	F56D3.1	none available	not known
Site222	5	WBGene00019888	btbd-10	R05F9.1	none available	BTB/POZ Domain-containing protein homolog
Site227	5	WBGene00018959	F56D1.1	F56D1.1	none available	not known
Site229	5	WBGene00022672	npp-24	ZK177.4	none available	Nuclear Pore complex Protein
Site230	5	WBGene00022672	npp-24	ZK177.4	none available	Nuclear Pore complex Protein
Site232	5	WBGene00000403	casy-1	B0034.3	casy-1 encodes a type I transmembrane protein with two extracellular Concise description: casy-1 encodes a type I transmembrane protein with two extracellular cadherin domains and an LG/LNS domain that is the sole C. elegans calsyntenin/alcadein ortholog; genetic studies indicate that in C. elegans casy-1 activity is required, in parallel to the insulin-like signaling pathway, for several types o…	CAlSYntenin/Alcadein homolog
Site235	5	WBGene00016317	C32D5.10	C32D5.10	none available	not known
Site237	5	WBGene00001023	dnj-5	C04A2.7	This gene encodes a protein containing a DnaJ ('J') domain.	DNaJ domain (prokaryotic heat shock protein)
Site244	5	WBGene00017125	acdh-12	E04F6.5	E04F6.5 is orthologous to the human gene ACYL-CoA DEHYDROGENASE, Concise description: E04F6.5 is orthologous to the human gene ACYL-CoA DEHYDROGENASE, VERY LONG-CHAIN (OMIM:201475), which when mutated leads to VLCAD deficiency, an	Acyl CoA DeHydrogenase
Site246	5	WBGene00018395	mtch-1	F43E2.7	none available	MiTochondrial Carrier Homolog
Site249	5	WBGene00015206	B0495.7	B0495.7	none available	not known
Site250	5	WBGene00011637	sds-22	T09A5.9	none available	SDS22 (conserved phosphatase regulator) homolog
Site252	5	WBGene00011349	T01H3.3	T01H3.3	none available	not known
Site253	5	WBGene00008436	DH11.2	DH11.2	none available	not known
Site263	5	WBGene00000240	pah-1	K08F8.4	pah-1 encodes a biochemically active phenylalanine-4-hydroxylase Concise description: pah-1 encodes a biochemically active phenylalanine-4-hydroxylase orthologous to human PAH; recombinant PAH-1 has hydroxylase activity on phenylalanine and tryptophan substrates in vitro; pah-1 is expressed in seam cells, tail hypodermal cells, and ventral hypodermis, with stronger posterior than anterior express…	PhenylAlanine Hydroxylase
Site271	5	WBGene00000170	aqp-2	C01G6.1	aqp-2 encodes, by alternative splicing, two isoforms of an Concise description: aqp-2 encodes, by alternative splicing, two isoforms of an biochemically atypical aquaglyceroporin; when expressed in Xenopus oocytes, AQP-2 increases water permeability 5- to 11-fold, and urea permeability 4.5-fold, but has no effect on glycerol permeability; AQP-2::GFP fusion proteins are expressed predominantly in …	AQuaPorin or aquaglyceroporin related
Site274	5	WBGene00006433	sdhb-1	F42A8.2	sdhb-1 encodes the C. elegans ortholog of human succinate dehydrogenase Concise description: sdhb-1 encodes the C. elegans ortholog of human succinate dehydrogenase subunit B (SDHB; OMIM:185470, mutations lead to extraadrenal pheochromocytoma) which contains several iron-sulfur (Fe-S) clusters and functions to transfer electrons from the A (SDHA) subunit to the membrane-associated C (SDHC) subuni…	Succinate DeHydrogenase complex subunit B
Site276	5	WBGene00007464	C08H9.3	C08H9.3	none available	not known
Site277	5	WBGene00002266	lec-3	ZK892.1	none available	gaLECtin
Site177	5	WBGene00002265	lec-2	F52H3.7	lec-2 encodes a 'tandem repeat' type galectin (beta-galactosyl-binding Concise description: lec-2 encodes a 'tandem repeat' type galectin (beta-galactosyl-binding lectin) containing two, tandemly arranged carbohydrate recognition domains; by homology, LEC-2 may play roles in cell adhesion and aggregation, proliferation, or programmed	gaLECtin
Site178	5	WBGene00009364	F33H1.3	F33H1.3	none available	not known
Site186	5	WBGene00000472	cey-1	F33A8.3	cey-1 encodes a protein with a cold-shock/Y-box domain that Concise description: cey-1 encodes a protein with a cold-shock/Y-box domain that is expressed in early embryonic blastomeres (at the 15-cell stage, i.e., pre-gastrulation),	C. Elegans Y-box
Site186	5	WBGene00009356	F33A8.10	F33A8.10	none available	not known
Site187	5	WBGene00003831	nuo-1	C09H10.3	nuo-1 encodes a encodes a 51 kDa subunit of mitochondrial complex Concise description: nuo-1 encodes a encodes a 51 kDa subunit of mitochondrial complex I that is required for oxidative phosphorylation, resistance to volatile anesthetics, and progression through development; nuo-1 is orthologous to human NDUFV1 (OMIM:161015, mutated in Leigh syndrome); nuo-1(ua1) induces a developmental arrest at…	NADH Ubiquinone Oxidoreductase
Site190	5	WBGene00009578	F40F8.5	F40F8.5	none available	not known
Site195	5	WBGene00001679	gpb-1	F13D12.7	gpb-1 encodes a heterotrimeric G protein beta subunit that Concise description: gpb-1 encodes a heterotrimeric G protein beta subunit that is required during embryonic development for the proper orientation of the mitotic spindle during early cell divisions and thus affects the orientation of early cell division axes, and is also required for larval viability, negatively regulates locomotion and …	G Protein, Beta subunit
Site200	5	WBGene00012085	T27D12.1	T27D12.1	none available	not known
Site298	5	WBGene00016219	pals-24	C29F9.4	none available	Protein containing ALS2cr12 (ALS2CR12) signature
Site318	5	WBGene00001561	gei-4	W07B3.2	gei-4 encodes a protein with a coiled-coil domain (predicted Concise description: gei-4 encodes a protein with a coiled-coil domain (predicted to mediate protein-protein interactions), an internal repeat of 69 residues (covering residues 134-202, 203-265, and 266-328 of W07B3.2a), and a glutamine/asparagine-rich domain; GEI-4 is paralogous to Y50D7A.8 and Y59C2A.3, physically interacts with GEX-2…	GEX Interacting protein
Site386	5	WBGene00019327	zip-2	K02F3.4	zip-2 encodes a bZIP transcription factor; ZIP-2 activity is Concise description: zip-2 encodes a bZIP transcription factor; ZIP-2 activity is required for regulating one branch of the immune response pathway that responds to infection by virulent strains of the bacterial pathogen Pseudomonas aeruginosa; specifically, ZIP-2 is required for inducing expression of a subset of infection response gen…	bZIP transcription factor family
Site314	5	WBGene00022349	Y82E9BR.17	Y82E9BR.17	none available	not known
Site315	5	WBGene00020115	mboa-6	R155.1	mboa-6 encodes, by alternative splicing, two isoforms of a Concise description: mboa-6 encodes, by alternative splicing, two isoforms of a putative transmembrane O-acyl transferase (MBOAT) that incorporates exogenous arachidonic acid into phosphatidylcholine (PC), phosphatidylserine (PS) and phosphatidylethanolamine (PE); MBOA-6 is required for normal larval development and body morphology, and f…	Membrane Bound O-Acyl transferase, MBOAT
Site316	5	WBGene00020115	mboa-6	R155.1	mboa-6 encodes, by alternative splicing, two isoforms of a Concise description: mboa-6 encodes, by alternative splicing, two isoforms of a putative transmembrane O-acyl transferase (MBOAT) that incorporates exogenous arachidonic acid into phosphatidylcholine (PC), phosphatidylserine (PS) and phosphatidylethanolamine (PE); MBOA-6 is required for normal larval development and body morphology, and f…	Membrane Bound O-Acyl transferase, MBOAT
Site320	5	WBGene00007969	acs-19	C36A4.9	none available	fatty Acid CoA Synthetase family
Site326	5	WBGene00014207	ZK1058.9	ZK1058.9	none available	not known
Site333	5	WBGene00003401	mpk-1	F43C1.2	mpk-1 encodes a mitogen-activated protein (MAP) kinase an ERK Concise description: mpk-1 encodes a mitogen-activated protein (MAP) kinase an ERK ortholog functioning in vulval cell fate specification, cell migration/guidance, defense against bacterial infection, and other processes; in proximal germline, sperm-dependent physiological MPK-1 activation results in phosphorylation based inactivation …	MAP Kinase
Site335	5	WBGene00006331	sup-26	R10E4.2	sup-26 encodes an RRM domain-containing protein; SUP-26 functions Concise description: sup-26 encodes an RRM domain-containing protein; SUP-26 functions in somatic sex determination via negative regulation of tra-2 translation; SUP-26 binds the tra-2 28-nucleotide repeat element known as the TRA-2/GLI element (TGE), which is located in tra-2 3';untranslated region (UTR); SUP-26 physically interac…	SUPpressor
Site337	5	WBGene00000380	cct-5	C07G2.3	cct-5 encodes, by alternative splicing, two isoforms of a putative Concise description: cct-5 encodes, by alternative splicing, two isoforms of a putative epsilon subunit of the eukaryotic cytosolic ('T complex') chaperonin, orthologous to human CCT5 (OMIM:610150, mutated in sensory neuropathy with spastic paraplegia); CCT-5 represses SKN-1-dependent transcription of gst-4; in mass RNAi assays, c…	Chaperonin Containing TCP-1
Site338	5	WBGene00000380	cct-5	C07G2.3	cct-5 encodes, by alternative splicing, two isoforms of a putative Concise description: cct-5 encodes, by alternative splicing, two isoforms of a putative epsilon subunit of the eukaryotic cytosolic ('T complex') chaperonin, orthologous to human CCT5 (OMIM:610150, mutated in sensory neuropathy with spastic paraplegia); CCT-5 represses SKN-1-dependent transcription of gst-4; in mass RNAi assays, c…	Chaperonin Containing TCP-1
Site348	5	WBGene00018802	F54D8.6	F54D8.6	none available	not known
Site350	5	WBGene00019831	R02F2.1	R02F2.1	none available	not known
Site355	5	WBGene00018963	ucr-1	F56D2.1	none available	Ubiquinol-Cytochrome c oxidoReductase complex
Site357	5	WBGene00017166	aldo-2	F01F1.12	aldo-2 encodes a fructose-bisphosphate aldolase homologous Concise description: aldo-2 encodes a fructose-bisphosphate aldolase homologous to human ALDOB, which when mutated leads to fructosemia, hereditary fructose intolerance	ALDOlase (fructose bisphosphate aldolase)
Site359	5	WBGene00021534	mvk-1	Y42G9A.4	mvk-1 encodes an ortholog of the human gene MEVALONATE KINASE Concise description: mvk-1 encodes an ortholog of the human gene MEVALONATE KINASE	MeValonate Kinase
Site369	5	WBGene00001168	eef-1A.1	F31E3.5	eef-1A.1 encodes a translation elongation factor 1-alpha homolog Concise description: eef-1A.1 encodes a translation elongation factor 1-alpha homolog that is required for embryonic viability, fertility, and germline maintenance; EEF-1A.1	Eukaryotic translation Elongation Factor
Site371	5	WBGene00001168	eef-1A.1	F31E3.5	eef-1A.1 encodes a translation elongation factor 1-alpha homolog Concise description: eef-1A.1 encodes a translation elongation factor 1-alpha homolog that is required for embryonic viability, fertility, and germline maintenance; EEF-1A.1	Eukaryotic translation Elongation Factor
Site375	5	WBGene00022734	ZK418.5	ZK418.5	none available	not known
Site382	5	WBGene00000542	clp-1	C06G4.2	clp-1 encodes a calpain homolog that has significant identity Concise description: clp-1 encodes a calpain homolog that has significant identity to mammalian calpains over its whole length and that contains motifs typical of calpains, including a thiol (cysteine) protease active site and a Ca[2+]-binding domain; CLP-1 is required, in parallel with TRA-3 but in series with ASP-3 and ASP-3, for deg…	CaLPain family
Site391	5	WBGene00006768	unc-32	ZK637.8	unc-32 encodes, by alternative splicing, six isoforms of an Concise description: unc-32 encodes, by alternative splicing, six isoforms of an ortholog of subunit a of the membrane-bound (V0) domain of vacuolar proton-translocating ATPase (V-ATPase); UNC-32 is orthologous to human ATP6N1A (OMIM:192130), ATP6V0A2, ATP6V0A4 (OMIM:605239, mutated in distal renal tubular acidosis), and TCIRG1 (OMIM:604…	UNCoordinated
Site395	5	WBGene00006540	tbg-1	F58A4.8	tbg-1 encodes gamma-tubulin; in C. elegans, tbg-1 activity Concise description: tbg-1 encodes gamma-tubulin; in C. elegans, tbg-1 activity is essential and is required for normal bipolar spindle assembly and function, as well as the fast phase of female pronuclear migration following fertilization; while tbg-1 is required for proper organization and function of kinetochore and interpolar microtub…	TuBulin, Gamma
Site396	5	WBGene00014075	dhhc-4	ZK757.4	none available	DHHC-types zinc finger protein
Site397	5	WBGene00007010	alx-1	R10E12.1	alx-1 encodes one of two C. elegans Bro1 domain-containing Concise description: alx-1 encodes one of two C. elegans Bro1 domain-containing proteins; during development, ALX-1 functions in the regulation of protein trafficking via endocytic recycling of clathrin-independent cargo and membrane-protein degradation; ALX-1 physically interacts with RME-1, a component of recycling endosomes that regula…	ALIX (Apoptosis-linked gene 2 interacting protein X) homolog
Site398	5	WBGene00007010	alx-1	R10E12.1	alx-1 encodes one of two C. elegans Bro1 domain-containing Concise description: alx-1 encodes one of two C. elegans Bro1 domain-containing proteins; during development, ALX-1 functions in the regulation of protein trafficking via endocytic recycling of clathrin-independent cargo and membrane-protein degradation; ALX-1 physically interacts with RME-1, a component of recycling endosomes that regula…	ALIX (Apoptosis-linked gene 2 interacting protein X) homolog
Site279	5	WBGene00000833	cts-1	T20G5.2	cts-1 encodes a citrate synthase; by homology, CTS-1 is predicted Concise description: cts-1 encodes a citrate synthase; by homology, CTS-1 is predicted to function in the citric acid cycle to catalyze the formation of citrate from oxaloacetate	CiTrate Synthase
Site283	5	WBGene00011875	cox-14	T20G5.14	none available	Cytochrome OXidase assembly protein
Site285	5	WBGene00012658	Y39A1A.21	Y39A1A.21	none available	not known
Site287	5	WBGene00010480	tasp-1	K01G5.9	K01G5.9 encodes an L-asparaginase predicted to catalyze the Concise description: K01G5.9 encodes an L-asparaginase predicted to catalyze the	TASPase homolog
Site290	5	WBGene00012126	T28D6.6	T28D6.6	none available	not known
Site293	5	WBGene00000273	brp-1	Y79H2A.1	brp-1 encodes a glutamine-rich protein that is conserved in Concise description: brp-1 encodes a glutamine-rich protein that is conserved in nematodes, but that has no known homologies or sequence motifs; BRP-1 is able to bypass the need for the S. cerevisiae mating pheromone MAP kinase cascade to activate	Bypass of Response to Pheromone in yeast
Site300	5	WBGene00012544	Y37D8A.2	Y37D8A.2	none available	not known
Site300	5	WBGene00012560	Y37D8A.25	Y37D8A.25	none available	not known
Site303	5	WBGene00012804	Y43F4B.7	Y43F4B.7	none available	not known
Site304	5	WBGene00012804	Y43F4B.7	Y43F4B.7	none available	not known
Site307	5	WBGene00006439	ant-1.1	T27E9.1	ant-1.1 encodes one of four C. elegans mitochondrial adenine Concise description: ant-1.1 encodes one of four C. elegans mitochondrial adenine nucleotide transporters; by homology, ANT-1.1 is predicted to facilitate ADP/ATP exchange between the cytosol and mitochondria; ant-1.1 is an essential gene, required for embryogenesis as well as for normal postembryonic body size and adult lifespan; in ad…	Adenine Nucleotide Translocator
Site309	5	WBGene00003048	lit-1	W06F12.1	lit-1 encodes a serine threonine protein kinase homolog related Concise description: lit-1 encodes a serine threonine protein kinase homolog related to the Drosophila protein Nemo; lit-1 is required for embryonic viability and plays a central role in controlling the asymmetry of cell divisions during embryogenesis; lit-1 acts downstream of mom-2 with respect to polarity defects and mediates larva…	Loss of InTestine
Site481	5	WBGene00020297	nog-1	T07A9.9	T07A9.9 encodes a GTPase with similarity to the mammalian CRFG Concise description: T07A9.9 encodes a GTPase with similarity to the mammalian CRFG proteins and Saccharomyces cerevisiae nucleolar NOG1 involved in biogenesis of the 60S ribosomal subunit; in C. elegans, T07A9.9 plays a role in regulating growth, development, lifespan, and fat metabolism; T07A9.9::GFP reporter fusions expressed ubiqu…	homolog of yeast NucleOlar G-protein
Site492	5	WBGene00019663	K11H12.7	K11H12.7	none available	not known
Site401	5	WBGene00021921	rbm-39	Y55F3AM.3	none available	RNA Binding Motif protein homolog
Site469	5	WBGene00019540	K08D12.6	K08D12.6	none available	not known
Site480	5	WBGene00021876	Y54G2A.11	Y54G2A.11	none available	not known
Site482	5	WBGene00000123	ama-1	F36A4.7	ama-1 encodes the large subunit of RNA polymerase II required Concise description: ama-1 encodes the large subunit of RNA polymerase II required for mRNA transcription; AMA-1 is essential for proper embryonic development, particularly for the early division and migration of the endodermal precursor (E) cells that initiate gastrulation; AMA-1 is expressed ubiquitously in the developing embryo	AMAnitin resistant
Site487	5	WBGene00022774	swsn-6	ZK616.4	none available	SWI/SNF nucleosome remodeling complex component
Site489	5	WBGene00022244	Y73B6BL.23	Y73B6BL.23	none available	not known
Site490	5	WBGene00018161	F38A5.2	F38A5.2	none available	not known
Site495	5	WBGene00015551	C06G3.5	C06G3.5	C06G3.5 is orthologous to human ADENOSINE DEAMINASE (ADA; OMIM:102700), Concise description: C06G3.5 is orthologous to human ADENOSINE DEAMINASE (ADA; OMIM:102700), which when mutated leads to severe combined immunodeficiency; in C. elegans, C06G3.5 is an essential gene; C06G3.5 is broadly expressed; about 2% to 6% of C06G3.5a transcripts are RNA edited to change A to G resulting in a change to r…	not known
Site498	5	WBGene00000942	deb-1	ZC477.9	The deb-1 gene encodes a vinculin ortholog highly conserved Concise description: The deb-1 gene encodes a vinculin ortholog highly conserved amongst metazoans including Drosophila, chick, and humans (OMIM:193065); DEB-1 is a muscle attachment protein found in dense bodies, and is required for attaching actin thin filaments to the basal sarcolemma; DEB-1 requires PAT-4/integrin-linked	DEnse Body
Site503	5	WBGene00018900	rod-1	F55G1.4	rod-1 encodes a novel protein that is orthologous to the Drosophila Concise description: rod-1 encodes a novel protein that is orthologous to the Drosophila Rough Deal and mammalian KNTC1 kinetochore components; in C. elegans, ROD-1 functions as part of the RZZ (Rod/Zw10/Zwilch) complex that regulates microtubule attachment to the kinetochores; ROD-1 physically interacts with, and negatively regu…	ROD (Drosophila RoughDeal) homolog
Site507	5	WBGene00016378	imp-3	C33H5.11	none available	IntraMembrane Protease (IMPAS) family
Site508	5	WBGene00016384	cdgs-1	C33H5.18	C33H5.18 encodes a CDP-diglyceride synthetase ortholog required Concise description: C33H5.18 encodes a CDP-diglyceride synthetase ortholog required for locomotion and osmoregulation; given its biochemical function in other organisms, C33H5.18 is expected to catalyse synthesis of cytidine diphosphate-diacylglycerol (CDP-DAG), an activated precursor for anionic and zwitterionic phospholipids, and …	Cdp-DaG Synthetase
Site513	5	WBGene00002162	isp-1	F42G8.12	isp-1 encodes a Rieske iron sulphur protein (ISP) which is Concise description: isp-1 encodes a Rieske iron sulphur protein (ISP) which is a subunit of the mitochondrial complex III in the mitochondrial membrane; the subunits are highly conserved in all mitochondria and aerobic bacteria; mitochondrial complex III catalyses electron transport from ubiquinol to cytochrome c; isp-1 mutants show low …	Iron-Sulfur Protein
Site517	5	WBGene00004995	spp-10	C28C12.7	spp-10 encodes two protein isoforms that are orthologous to Concise description: spp-10 encodes two protein isoforms that are orthologous to the human gene PROSAPOSIN (PSAP; OMIM:176801, mutated in Gaucher disease and metachromatic leukodystrophy); SPP-10A and -10B are predicted to have 3 and 4 embedded saposin sequences, that are likely to be split into individual saposin peptides by proteolysis…	SaPosin-like Protein family
Site519	5	WBGene00004993	spp-8	C28C12.5	none available	SaPosin-like Protein family
Site520	5	WBGene00003864	oma-1	C09G9.6	oma-1 encodes a zinc finger protein of the TIS11 finger type Concise description: oma-1 encodes a zinc finger protein of the TIS11 finger type that is paralogous to OMA-2; while either oma-1 or oma-2 individually have no obvious mutant phenotype, oma-1 and oma-2 doubly mutant animals show defects in oocyte maturation, indicating that the two genes function redundantly in this process; whereas nor…	Oocyte MAturation defective
Site526	5	WBGene00000696	col-122	T05A1.2	none available	COLlagen
Site526	5	WBGene00011454	lron-14	T05A1.3	none available	eLRR (extracellular Leucine-Rich Repeat) ONly
Site410	5	WBGene00012782	Y43C5A.2	Y43C5A.2	none available	not known
Site412	5	WBGene00006779	unc-43	K11E8.1	unc-43 encodes the C. elegans ortholog of type II calcium/calmodulin-dependent Concise description: unc-43 encodes the C. elegans ortholog of type II calcium/calmodulin-dependent protein kinase (CaMKII); unc-43 activity is required for a number of processes, including locomotion, neuronal cell fate specification and regulation of synaptic density, egg laying, defecation, and meiotic maturation; i…	UNCoordinated
Site413	5	WBGene00006779	unc-43	K11E8.1	unc-43 encodes the C. elegans ortholog of type II calcium/calmodulin-dependent Concise description: unc-43 encodes the C. elegans ortholog of type II calcium/calmodulin-dependent protein kinase (CaMKII); unc-43 activity is required for a number of processes, including locomotion, neuronal cell fate specification and regulation of synaptic density, egg laying, defecation, and meiotic maturation; i…	UNCoordinated
Site416	5	WBGene00012015	T25B9.9	T25B9.9	none available	not known
Site417	5	WBGene00008750	F13E9.1	F13E9.1	none available	not known
Site417	5	WBGene00008760	F13E9.11	F13E9.11	none available	not known
Site421	5	WBGene00008503	F01G4.4	F01G4.4	none available	not known
Site424	5	WBGene00008503	F01G4.4	F01G4.4	none available	not known
Site432	5	WBGene00008505	F01G4.6	F01G4.6	none available	not known
Site437	5	WBGene00014076	ZK792.1	ZK792.1	none available	not known
Site439	5	WBGene00002363	let-92	F38H4.9	let-92 encodes a homolog of PP2AC, the catalytic subunit of Concise description: let-92 encodes a homolog of PP2AC, the catalytic subunit of protein phosphatase 2A (PP2A); let-92 was identified genetically in screens for essential genes on chromosome IV; LET-92 may regulate a number of signal transduction pathways as it is required for embryogenesis, larval development, Ras-mediated vulval develo…	LEThal
Site440	5	WBGene00001398	fat-6	VZK822L.1	fat-6 encodes an Acyl-CoA desaturase (also known as delta-9 Concise description: fat-6 encodes an Acyl-CoA desaturase (also known as delta-9 fatty acid desaturase); when expressed heterologously in S. cerevisiae, FAT-6 rescues the fatty acid auxotrophy of the ole1 delta-9 desaturase mutant; FAT-6 readily desaturates stearic acid (18:0), or similar fatty acids (17:0 or 18:1 delta-11 trans), but sh…	FATty acid desaturase
Site441	5	WBGene00001398	fat-6	VZK822L.1	fat-6 encodes an Acyl-CoA desaturase (also known as delta-9 Concise description: fat-6 encodes an Acyl-CoA desaturase (also known as delta-9 fatty acid desaturase); when expressed heterologously in S. cerevisiae, FAT-6 rescues the fatty acid auxotrophy of the ole1 delta-9 desaturase mutant; FAT-6 readily desaturates stearic acid (18:0), or similar fatty acids (17:0 or 18:1 delta-11 trans), but sh…	FATty acid desaturase
Site445	5	WBGene00007091	eri-12	B0001.6	none available	Enhanced RNAI (RNA interference)
Site449	5	WBGene00007091	eri-12	B0001.6	none available	Enhanced RNAI (RNA interference)
Site453	5	WBGene00010828	M02B1.3	M02B1.3	none available	not known
Site454	5	WBGene00003150	mbk-2	F49E11.1	mbk-2 encodes one of two C. elegans members of the DYRK (dual-specificity Concise description: mbk-2 encodes one of two C. elegans members of the DYRK (dual-specificity Yak1-related kinase) family of proteins that includes S. cerevisiae Yak1 and the Drosophila minibrain and DYRK2 kinases; MBK-2 activity is required maternally for the oocyte-to-egg transition that occurs during the earliest stages…	MiniBrain Kinase (Drosophila) homolog
Site455	5	WBGene00001394	fat-2	W02A2.1	fat-2 encodes a delta-12 fatty acyl desaturase that increases Concise description: fat-2 encodes a delta-12 fatty acyl desaturase that increases membrane fluidity when expressed in yeast, and that may protect against cold stress; FAT-2's substrate is unknown, but may be acyl-CoA; FAT-2 is required in vivo for normal levels of C18 or C20 polyunsaturated fatty acids (PUFAs); FAT-2 is fully required…	FATty acid desaturase
Site459	5	WBGene00004430	rpl-18	Y45F10D.12	rpl-18 encodes a large ribosomal subunit L18 protein.	Ribosomal Protein, Large subunit
Site460	5	WBGene00003086	lst-4	Y37A1B.2	lst-4 encodes multiple isoforms of a sorting nexin that are Concise description: lst-4 encodes multiple isoforms of a sorting nexin that are the sole C. elegans members of the SNX9 family of sorting nexins ; activity of the SH3 domain-containing LST-4 isoforms is required for regulation of phagosome maturation during apoptotic cell corpse clearance, specifically for regulating phagosomal fusion w…	Lateral Signaling Target
Site463	5	WBGene00013311	sec-61	Y57G11C.15	none available	yeast SEC homolog
Site474	5	WBGene00000224	atgp-1	F26D10.9	atgp-1 encodes a predicted amino acid transporter glycoprotein Concise description: atgp-1 encodes a predicted amino acid transporter glycoprotein subunit; when co-expressed in Xenopus oocytes with the AAT-1 or AAT-3 catalytic subunit, ATGP-1 is not able to facilitate amino acid uptake, even though ATGP-1 is able to covalently associate with AAT-1 or AAT-3 in the Xenopus expression system; howeve…	Amino acid Transporter GlycoProtein subunit
Site475	5	WBGene00002005	hsp-1	F26D10.3	hsp-1 encodes hsp70A, a member of the heat shock family of Concise description: hsp-1 encodes hsp70A, a member of the heat shock family of proteins; hsp70A is closely related to the Drosophila heat inducible hsp70s and the S. cerevisiae SSA hsp70 subfamily; the hsp-1 gene is normally expressed throughout development and upon heat-shock the hsp-1 mRNA is enhanced 2-6 fold; down-regulation of hsp-1…	Heat Shock Protein
Site477	5	WBGene00002005	hsp-1	F26D10.3	hsp-1 encodes hsp70A, a member of the heat shock family of Concise description: hsp-1 encodes hsp70A, a member of the heat shock family of proteins; hsp70A is closely related to the Drosophila heat inducible hsp70s and the S. cerevisiae SSA hsp70 subfamily; the hsp-1 gene is normally expressed throughout development and upon heat-shock the hsp-1 mRNA is enhanced 2-6 fold; down-regulation of hsp-1…	Heat Shock Protein
Site534	5	WBGene00010964	ctc-1	MTCE.26	The ctc-1 gene resides on the mitochondrial chromosome, and Concise description: The ctc-1 gene resides on the mitochondrial chromosome, and encodes the protein cytochrome c oxidase subunit 1; CTC-1 functions as the catalytic subunit of the cytochrome c oxidase complex (also known as Complex IV) that is the terminal member of the electron transport chain that catalyzes the reduction of	mitochondrial genome encoded CyTochrome C oxidase subunit Gene class description: mitochondrial genome encoded CyTochrome C oxidase subunit
Site535	5	WBGene00010964	ctc-1	MTCE.26	The ctc-1 gene resides on the mitochondrial chromosome, and Concise description: The ctc-1 gene resides on the mitochondrial chromosome, and encodes the protein cytochrome c oxidase subunit 1; CTC-1 functions as the catalytic subunit of the cytochrome c oxidase complex (also known as Complex IV) that is the terminal member of the electron transport chain that catalyzes the reduction of	mitochondrial genome encoded CyTochrome C oxidase subunit Gene class description: mitochondrial genome encoded CyTochrome C oxidase subunit
Site597	5	WBGene00022645	ZK6.11	ZK6.11	none available	not known
Site611	5	WBGene00001564	icl-1	C05E4.9	icl-1 encodes a predicted isocitrate lyase/malate synthase, Concise description: icl-1 encodes a predicted isocitrate lyase/malate synthase, an enzyme known to function in the glyoxylate cycle; ICL-1 was identified in a screen for proteins that interact with GEX-3, a homolog of human HEM-2 which is required for embryonic development; ICL-1 appears to act downstream of DAF-16 to influence	IsoCitrate Lyase homolog
Site612	5	WBGene00001564	icl-1	C05E4.9	icl-1 encodes a predicted isocitrate lyase/malate synthase, Concise description: icl-1 encodes a predicted isocitrate lyase/malate synthase, an enzyme known to function in the glyoxylate cycle; ICL-1 was identified in a screen for proteins that interact with GEX-3, a homolog of human HEM-2 which is required for embryonic development; ICL-1 appears to act downstream of DAF-16 to influence	IsoCitrate Lyase homolog
Site592	5	WBGene00020957	W02H5.2	W02H5.2	none available	not known
Site595	5	WBGene00003025	lin-40	T27C4.4	lin-40 encodes, along with egl-27, one of two C. elegans homologs Concise description: lin-40 encodes, along with egl-27, one of two C. elegans homologs of human MTA1 (metastasis-associated protein), part of a nucleosome remodeling and histone deacetylation (NURD) complex; lin-40 is an essential gene required for proper vulval cell fate specification and morphogenesis; in addition, lin-40 acts wi…	abnormal cell LINeage
Site596	5	WBGene00003025	lin-40	T27C4.4	lin-40 encodes, along with egl-27, one of two C. elegans homologs Concise description: lin-40 encodes, along with egl-27, one of two C. elegans homologs of human MTA1 (metastasis-associated protein), part of a nucleosome remodeling and histone deacetylation (NURD) complex; lin-40 is an essential gene required for proper vulval cell fate specification and morphogenesis; in addition, lin-40 acts wi…	abnormal cell LINeage
Site596	5	WBGene00020854	T27C4.1	T27C4.1	none available	not known
Site600	5	WBGene00004104	pqn-13	C14C11.8	The protein product of this gene is predicted to contain a Concise description: The protein product of this gene is predicted to contain a glutamine/asparagine (Q/N)-rich ('prion') domain, by the algorithm of Michelitsch	Prion-like-(Q/N-rich)-domain-bearing protein
Site602	5	WBGene00017766	peli-1	F25B4.2	F25B4.2 encodes a protein with similarity to the Pellino family Concise description: F25B4.2 encodes a protein with similarity to the Pellino family of E3 ubiquitin ligases that function in regulation of Toll signaling; loss of F25B4.2 activity via RNAi results in embryonic arrest; an F25B4.2::mCherry promoter fusion is expressed in ciliated neurons, including the ASK, ADL, ASI, ASH, ASJ, PHA and…	PELI1 and PELI2 related
Site603	5	WBGene00000802	crt-1	Y38A10A.5	crt-1 encodes an ortholog of calreticulin (a calcium-binding Concise description: crt-1 encodes an ortholog of calreticulin (a calcium-binding molecular chaperone of the endoplasmic reticulum); crt-1 is dispensable for viability, but required for normal sperm development, male mating efficiency, some forms of necrotic cell death, and hermaphrodite fertility at high temperatures (which may reflect…	CalReTiculin
Site604	5	WBGene00020274	T05H4.11	T05H4.11	none available	not known
Site605	5	WBGene00020909	W01A11.1	W01A11.1	none available	not known
Site606	5	WBGene00001073	dpy-11	F46E10.9	none available	DumPY: shorter than wild-type
Site607	5	WBGene00020808	clik-1	T25F10.6	none available	CaLponIn-liKe proteins
Site613	5	WBGene00022410	Y97E10C.1	Y97E10C.1	none available	not known
Site614	5	WBGene00016146	C26F1.1	C26F1.1	none available	not known
Site615	5	WBGene00016500	memo-1	C37C3.8	none available	MEdiator of cell MOtility 1 homolog
Site616	5	WBGene00016496	C37C3.2	C37C3.2	C37C3.2 encodes the C. elegans ortholog of translation initiation Concise description: C37C3.2 encodes the C. elegans ortholog of translation initiation factor 5 (eIF5); by homology to budding yeast, the products of C37C3.2 are predicted to function during translation initiation as GTPase activators to stimulate GTP hydrolysis by eIF2-GTP-Met-tRNAi; C37C3.2 is an essential gene, with loss of C37C…	not known
Site617	5	WBGene00022393	abhd-12	Y97E10AL.2	none available	ABHydrolase Domain containing homolog
Site620	5	WBGene00006309	sul-2	D1014.1	sul-2 is orthologous to the human gene ARYLSULFATASE A (ARSA; Concise description: sul-2 is orthologous to the human gene ARYLSULFATASE A (ARSA;	SULfatase domain protein
Site621	5	WBGene00006582	tmd-2	C08D8.2	none available	TropoMoDulin
Site622	5	WBGene00018700	lmd-3	F52E1.13	none available	LysM Domain (peptidoglycan binding) protein
Site623	5	WBGene00018700	lmd-3	F52E1.13	none available	LysM Domain (peptidoglycan binding) protein
Site624	5	WBGene00018700	lmd-3	F52E1.13	none available	LysM Domain (peptidoglycan binding) protein
Site627	5	WBGene00017659	F21C10.10	F21C10.10	none available	not known
Site544	5	WBGene00012100	sipa-1	T27F2.2	T27F2.2 encodes a homolog of human SIPA1/EHBP1L1 (OMIM:602180) Concise description: T27F2.2 encodes a homolog of human SIPA1/EHBP1L1 (OMIM:602180)	SIPA (vertebrate Signal-Induced Proliferation-Associated) Gene class description: SIPA (vertebrate Signal-Induced Proliferation-Associated)
Site550	5	WBGene00010736	istr-1	K10C8.3	none available	Increased Sodium Tolerance Related
Site551	5	WBGene00007605	hrg-7	C15C8.3	none available	Heme Responsive Gene
Site552	5	WBGene00002250	lap-2	W07G4.4	The lap-2 gene encodes a homolog of the zinc metalloprotease Concise description: The lap-2 gene encodes a homolog of the zinc metalloprotease	Leucine AminoPeptidase
Site555	5	WBGene00009975	F53C11.5	F53C11.5	none available	not known
Site561	5	WBGene00008396	D1086.9	D1086.9	none available	not known
Site564	5	WBGene00044201	H39E23.3	H39E23.3	none available	not known
Site574	5	WBGene00044201	H39E23.3	H39E23.3	none available	not known
Site575	5	WBGene00013025	vha-13	Y49A3A.2	vha-13 encodes an ortholog of subunit A of the cytoplasmic Concise description: vha-13 encodes an ortholog of subunit A of the cytoplasmic (V1) domain of vacuolar proton-translocating ATPase (V-ATPase); VHA-13 is predicted to hydrolyse ATP as part of a cytosolic VHA-12/VHA-13 heterohexamer, whose activity drives the V-ATPase rotor; VHA-13 levels are lowered in mutants with either abnormally low o…	Vacuolar H ATPase
Site583	5	WBGene00004336	ret-1	W06A7.3	none available	RETiculon protein
Site591	5	WBGene00001851	hif-1	F38A6.3	hif-1 encodes an ortholog of the mammalian hypoxia-induced Concise description: hif-1 encodes an ortholog of the mammalian hypoxia-induced factor HIF-1, and is required for survival in hypoxic environments (1% oxygen) that	HIF (Hypoxia Inducible Factor) homologa
Site678	5	WBGene00020507	vha-15	T14F9.1	vha-15 encodes an ortholog of subunit H of the cytoplasmic Concise description: vha-15 encodes an ortholog of subunit H of the cytoplasmic (V1) domain of vacuolar proton-translocating ATPase (V-ATPase); VHA-15 and VHA-18 are co-orthologs; VHA-15, along with VHA-2 and probably all V-ATPase subunits, is required for systemic RNAi, probably during endocytotic RNAi uptake; VHA-15 is a	Vacuolar H ATPase
Site679	5	WBGene00004423	rpl-11.2	F07D10.1	rpl-11.2 encodes a large ribosomal subunit L11 protein; by Concise description: rpl-11.2 encodes a large ribosomal subunit L11 protein; by	Ribosomal Protein, Large subunit
Site683	5	WBGene00020194	T03G6.1	T03G6.1	none available	not known
Site690	5	WBGene00001684	gpd-2	K10B3.8	gpd-2 encodes one of four C. elegans glyceraldehyde-3-phosphate Concise description: gpd-2 encodes one of four C. elegans glyceraldehyde-3-phosphate dehydrogenases (GAPDHs); by homology, GPD-2 is predicted to reversibly catalyze the oxidation and phosphorylation of glyceraldehyde-3-phosphate to 1,3-diphosphoglycerate during glycolysis; in C. elegans, GPD-2 and GPD-3 constitute the major GAPDH iso…	GPD (Glyceraldehyde 3-Phosphate Dehydrogenase)
Site691	5	WBGene00002217	klp-4	F56E3.3	klp-4 encodes a kinesin-like motor protein paralogous to UNC-104 Concise description: klp-4 encodes a kinesin-like motor protein paralogous to UNC-104 and KLP-6 and orthologous to Drosophila KHC-73 and the vertebrate KIF1A, KIF13B, and GAKIN motor proteins; as loss of KLP-4 function via RNA-mediated interference (RNAi) does not result in any abnormalities, the precise role of KLP-4 in C. elegans …	Kinesin-Like Protein
Site693	5	WBGene00018237	irg-7	F40F4.6	none available	Infection Response Gene
Site694	5	WBGene00018237	irg-7	F40F4.6	none available	Infection Response Gene
Site695	5	WBGene00000503	cht-1	C04F6.3	cht-1 encodes a chitinase orthologous to human chitinase-1 Concise description: cht-1 encodes a chitinase orthologous to human chitinase-1 (OMIM:600031, mutations are associated with chitotriosidase deficiency); CHT-1 is predicted to function as an extracellular O-glycosyl hydrolase that hydrolyzes the glycosidic bond between two or more carbohydrates; in C. elegans, CHT-1 may play a role in embr…	CHiTinase
Site696	5	WBGene00006929	vit-5	C04F6.1	vit-5 encodes a vitellogenin, a lipid-binding protein precursor Concise description: vit-5 encodes a vitellogenin, a lipid-binding protein precursor related to vertebrate vitellogenins and mammalian ApoB-100, a core LDL particle constituent; by homology, VIT-5 is predicted to function as a lipid transport protein; loss of vit-5 activity via large-scale RNA-mediated interference (RNAi) screens ind…	VITellogenin structural genes (yolk protein genes)
Site697	5	WBGene00006928	vit-4	F59D8.2	none available	VITellogenin structural genes (yolk protein genes)
Site698	5	WBGene00015954	C18B2.3	C18B2.3	none available	not known
Site699	5	WBGene00020012	R11G1.6	R11G1.6	none available	not known
Site702	5	WBGene00018569	F47F2.1	F47F2.1	none available	not known
Site703	5	WBGene00016706	C46C11.3	C46C11.3	none available	not known
Site704	5	WBGene00000066	act-4	M03F4.2	act-4 encodes an actin isoform that is most similar to act-2 Concise description: act-4 encodes an actin isoform that is most similar to act-2 in amino acid sequence; an act-4 reporter gene is expressed in body wall and vulval	ACTin
Site706	5	WBGene00000066	act-4	M03F4.2	act-4 encodes an actin isoform that is most similar to act-2 Concise description: act-4 encodes an actin isoform that is most similar to act-2 in amino acid sequence; an act-4 reporter gene is expressed in body wall and vulval	ACTin
Site707	5	WBGene00006926	vit-2	C42D8.2	vit-2 encodes the vitellogenin homolog YP170; vit-2 is expressed Concise description: vit-2 encodes the vitellogenin homolog YP170; vit-2 is expressed in the adult hermaphrodite intestine and VIT-2 is secreted into the pseudocoelomic space before being taken up by developing oocytes; vit-2 expression is regulated in a sex-, stage-, and tissue-specific manner by the ELT-2/GATA and MAB-3 transcript…	VITellogenin structural genes (yolk protein genes)
Site710	5	WBGene00019250	H28G03.2	H28G03.2	none available	not known
Site711	5	WBGene00015779	lrch-1	C14F11.2	none available	Leucine-rich Repeats (LRR) and Calponin Homology (CH) domain Gene class description: Leucine-rich Repeats (LRR) and Calponin Homology (CH) domain
Site716	5	WBGene00019619	asp-14	K10C2.3	asp-14 encodes an aspartyl protease.	ASpartyl Protease
Site717	5	WBGene00003877	pept-1	K04E7.2	pept-1 encodes a low affinity/high capacity oligopeptide transporter; Concise description: pept-1 encodes a low affinity/high capacity oligopeptide transporter; pept-1 is required for uptake of intact peptides from the intestine and thus for normal development, growth, and reproduction; genetic studies indicate that pept-1 interacts with both the daf-2/insulin- and let-363/TOR-signaling pathways …	PEPTide transporter family
Site720	5	WBGene00000216	asp-3	H22K11.1	asp-3 encodes an aspartyl protease homolog that is required, Concise description: asp-3 encodes an aspartyl protease homolog that is required, in parallel with ASP-4 but downstream of CLP-1 and TRA-3, for degenerative (necrotic-like)	ASpartyl Protease
Site722	5	WBGene00018519	F46H5.3	F46H5.3	none available	not known
Site724	5	WBGene00018605	F48E3.4	F48E3.4	none available	not known
Site727	5	WBGene00001000	dim-1	C18A11.7	dim-1 encodes novel proteins containing three immunoglobulin-like Concise description: dim-1 encodes novel proteins containing three immunoglobulin-like repeats in the carboxy terminus; dim-1 was originally identified in screens for mutations that suppress locomotion defects caused by aberrant muscle assembly in animals carrying a missense mutation in unc-112, which encodes a pleckstrin homology …	DIsorganized Muscle
Site729	5	WBGene00015181	B0416.5	B0416.5	none available	not known
Site642	5	WBGene00009259	hpo-34	F29G6.3	none available	Hypersensitive to POre-forming toxin
Site643	5	WBGene00009259	hpo-34	F29G6.3	none available	Hypersensitive to POre-forming toxin
Site644	5	WBGene00009259	hpo-34	F29G6.3	none available	Hypersensitive to POre-forming toxin
Site650	5	WBGene00004739	scd-1	H20J18.1	scd-1 encodes a novel protein with several regions that are Concise description: scd-1 encodes a novel protein with several regions that are extremely glutamine (Q) rich, interspersed with other residues (usually alanine); SCD-1 affects signalling by proteins in the DAF-7/transforming growth factor (TGF)-beta pathway (DAF-1, DAF-8, and DAF-14), and the Q-rich regions of SCD-1 protein may	Suppressor of Constitutive Dauer formation
Site651	5	WBGene00004739	scd-1	H20J18.1	scd-1 encodes a novel protein with several regions that are Concise description: scd-1 encodes a novel protein with several regions that are extremely glutamine (Q) rich, interspersed with other residues (usually alanine); SCD-1 affects signalling by proteins in the DAF-7/transforming growth factor (TGF)-beta pathway (DAF-1, DAF-8, and DAF-14), and the Q-rich regions of SCD-1 protein may	Suppressor of Constitutive Dauer formation
Site652	5	WBGene00004739	scd-1	H20J18.1	scd-1 encodes a novel protein with several regions that are Concise description: scd-1 encodes a novel protein with several regions that are extremely glutamine (Q) rich, interspersed with other residues (usually alanine); SCD-1 affects signalling by proteins in the DAF-7/transforming growth factor (TGF)-beta pathway (DAF-1, DAF-8, and DAF-14), and the Q-rich regions of SCD-1 protein may	Suppressor of Constitutive Dauer formation
Site664	5	WBGene00010605	K06G5.1	K06G5.1	none available	not known
Site669	5	WBGene00009628	tatn-1	F42D1.2	tatn-1 encodes a putative tyrosine aminotransferase, orthologous Concise description: tatn-1 encodes a putative tyrosine aminotransferase, orthologous to human TAT (OMIM:276600, mutated in type II tyrosinemia); tatn-1 is expressed in larval and adult pharynx, hypodermis, body wall muscle, and intestine, and in adult vulval muscle and reproductive system; tatn-1 is required for the tyrosinemic	Tyrosine AminoTraNsferase
Site670	5	WBGene00010357	H03A11.2	H03A11.2	none available	not known
Site671	5	WBGene00006494	zipt-7.2	H13N06.5	none available	Zrt (ZRT), Irt- (IRT-) like Protein Transporter
Site674	5	WBGene00015545	C06G1.1	C06G1.1	none available	not known
Site675	5	WBGene00003370	mlc-2	C36E6.5	mlc-2 encodes, along with mlc-1 and mlc-4, one of three C. Concise description: mlc-2 encodes, along with mlc-1 and mlc-4, one of three C. elegans regulatory myosin light chains; MLC-2 is predicted to function as a regulator of myosin ATPase activity, and genetic studies indicate that MLC-2 is nearly essential in hermaphrodites for normal pharyngeal muscle function, but redundant with MLC-1, with…	Myosin Light Chain
Site675	5	WBGene00016490	C36E6.2	C36E6.2	none available	not known

## Sheet: by_read
Table S5. List of loci with missing genomic sequences that affect exon revealed by direct RNA sequencing
Chromosome	Start	End	Read name	Read_start	Read_end	Strand	sequence	Insertion site	Supporting read_number	WBID	Symbol	Sequence name	Concise description	Gene class
I	111043	111044	c7ed2644-192d-4ec6-a012-e46b045b76dc	18	105	+	AATCGCCTGCTGCTCAACAAGAAGAACGAACGAGAAACTGTATACCTGGTGTGAAAGAGAGCCGACGCCCGTCTCAGGCTGCTCATTCAAGTGACCGTCGTCGTT	Site16	7	WBGene00004418	rpl-7	F53G12.10	rpl-7 encodes a large ribosomal subunit L7 protein required Concise description: rpl-7 encodes a large ribosomal subunit L7 protein required	Ribosomal Protein, Large subunit
I	111045	111046	547548f3-115d-4779-8ff6-da75c2102a69	20	307	+	TCGCCTATTATTAATGGCACCATAAAGAAGCAGTGCCACAGGTTCCAGAATAGCTGCACCGTGGTGAGAAAGAGCCGTCCGCCCGTCAGGCTGTTCATTCCACGAGGTTGACCACGTTCGCTCATTCTGAACAAGAAGAAGACCCGCTCCAAGCGTTGGAATCTCCAGGAGTACAGAACGCCTAAGGAAGGAGGACTTAGACTTCGGTGCGAGGCTGAGGCCAAGACTTCACGTCACCGGTAGTGGTCACGAGGTCGTCTGTCGTAAGAAATTCGTGACTACTCTAGTTACTCCTGGCACTGAGAAG	Site16	7	WBGene00004418	rpl-7	F53G12.10	rpl-7 encodes a large ribosomal subunit L7 protein required Concise description: rpl-7 encodes a large ribosomal subunit L7 protein required	Ribosomal Protein, Large subunit
I	111046	111047	475618ef-d5c8-4b0d-a251-b602a78eed83	20	347	+	CGCCTATAATGGCTCCAACAAAGAAGTCGCACAGGTTCCAGAAAACTGTGCTCAAGCAAGAGCAGAAATTTGATGCCCGCCCAAGGCTGCTCCAACACCAGGTGACCTGTCGTCTATTCTTTGGAACAAAGAAGAAGCTCCTTGTTACTTCTGGCATTGGGAAACGCTCAGGAGTCGGATATCCAAAAGGACATGGACTCTGTAAGTTAGTGTCAAAGGGACTTACGTTTCCTGGCTGTATACCGGGTCACGTCTCTGCCGCCGGAATCACAGGTATCAGCTCGGCAAGTGAGCTCAGAAACCTCGTCTCGCGCGGATTCAACGGAGTGTTTGCGCTGTTGGGCTAC	Site16	7	WBGene00004418	rpl-7	F53G12.10	rpl-7 encodes a large ribosomal subunit L7 protein required Concise description: rpl-7 encodes a large ribosomal subunit L7 protein required	Ribosomal Protein, Large subunit
I	111048	111049	f9ad587d-79e3-4c42-b6d3-5a9f592874b7	24	518	+	CCTATAATGGCTCCAACAAGAATAGACACAGGTTCCAGAAAACTGTGTTCACCAAGCGCGAAGAAAGCAGAGCCGATGCCCATCGCCTGGAATTGCCTTTACACCAGGTGACCGTCGCCGCCGGCAGAACAAGGAGAAGAAGACCCATTTCAAGCGGCAAAGAGAGAATACGTCCAGGTTCAGAACGAACGTCTGAGTATTAGGCTGTTAGGGAGACTTTACGTTCCGCTACGAGTGAGTTCAGGTTTGCTCTGTTCGCGTGAAGAATCACTACATGGTATTACTACGCTGGGTCACCAAAGCCAAGAGAGAAAGGCTCCAGATCCATCTATACAAGAACCAACAGAGTGGCGTCTATCAAGCTGAACAAGGCTACTCTTCCTCGTAACATTGGCAACC…	Site16	7	WBGene00004418	rpl-7	F53G12.10	rpl-7 encodes a large ribosomal subunit L7 protein required Concise description: rpl-7 encodes a large ribosomal subunit L7 protein required	Ribosomal Protein, Large subunit
I	111054	111055	f136229d-918c-4af4-83cd-c0e5b944c6c9	30	102	+	ATGGCTCCATCATTGATTATCAGGAGACAAGGATTCTTGTTGCTTGGTGGAAAAGCAGAGTTCGATGCCCGCACCAAGTTTAACACACCGGTGTTGCGCCGC	Site16	7	WBGene00004418	rpl-7	F53G12.10	rpl-7 encodes a large ribosomal subunit L7 protein required Concise description: rpl-7 encodes a large ribosomal subunit L7 protein required	Ribosomal Protein, Large subunit
I	111054	111055	da41df87-3ef0-479b-89df-95c0d37f773b	31	274	+	ATGGCTCCATCAACCAGAAAGTGCCAGACCAAGCAGAGCAGAGCCGACGCCTGCCACCAGCAATACCAACAAAGCTGCCAAACTAAGAACACAAGAAGACCCTAAATATTCATGAGCGCCAGCAAGAATACCCGGAGACAGAAACGCCCTGGGAAGGAAGGGAACCGGAACACCGGGCGAGGCGGGCCGGGAGACTTACCATCCAGCTGACAGGTCGCCTTCGTCGTTTCAGAATTCGGTATTTACTTCAGCTTTATTCCTCAAGCCTGAAAAG	Site16	7	WBGene00004418	rpl-7	F53G12.10	rpl-7 encodes a large ribosomal subunit L7 protein required Concise description: rpl-7 encodes a large ribosomal subunit L7 protein required	Ribosomal Protein, Large subunit
I	111055	111056	85a8d9f9-47b2-4743-b790-7a19fb5eaf5f	31	114	+	TGGCTCCAACAAGAAAGTGCATGATCCAAGAATAACGCCCTTTGCAAGCCAAGAAAGCAGAGAAACCGTCCGCCCTATCCTGGGCTATCTACACATGCCCCGATTGACCGTTGC	Site16	7	WBGene00004418	rpl-7	F53G12.10	rpl-7 encodes a large ribosomal subunit L7 protein required Concise description: rpl-7 encodes a large ribosomal subunit L7 protein required	Ribosomal Protein, Large subunit
I	111173	111174	6cfc5573-49d1-4946-bbb1-0ba3b176541c	58	444	+	CAGGTTCCGGGAAAACTGTTGCCTTGGTGCAGAAGAGCCGATGCCCGCACCTGATTGTTCATACACGAAGGTGACCAATGCCGCTTAAGAACAAGGAGTGAAGGAAGACACCCAATATACTCATCAAGCGTAAGAATACGTCCGAAGGAGTACAGAAACGCCTCAAAAAGGTTGTTTAGACTCAAATGAGGTTGGGGGGCCAAAGACTTTACACGTTTCCGGTAGGGTCACGAGTCGTCCTTCGTCGTACGAATTCGCTAGTATCAACCGGTTACAACACCTGGTCAGAAAAGGCTCCGGATCCGTTTATACAAGTCTAACAACGGAGAAGGTTCGTTAGGTAGAACAGGTTATCTTCTACTACACTGTTAACTGGTACGGGTTAGGTTGGTCCGAATT…	Site17	7	WBGene00004418	rpl-7	F53G12.10	rpl-7 encodes a large ribosomal subunit L7 protein required Concise description: rpl-7 encodes a large ribosomal subunit L7 protein required	Ribosomal Protein, Large subunit
I	111180	111181	b941a26c-517b-4190-89b4-a9b81653359a	56	395	+	CAGAAACTGTGCTCAAGCGCAGAAAGCAGAGCCGATGCCCGCCACAATCAAGGCTATCTCATTCTAAGGTGACCGTCATCATCTAAGAGAACACAAGAAGACTTCCAATACTTTTCAAGCGTGCTGAGAGAAAATACGTCCAGGAGTACAGAAACGCCCTACTGGACAAGGACTTGACGAGTGCATGAGGAGGTGACTCAGAAGGTGGACAGGTGCAAGGAAAAACAGGAGGCACACACACCCAAAATACCGGCCGAAGGTGAGGCTCCGGGATCACCATTTCGCCGGGCGGACTCATTACAGGGTGCAAACAAACCGGACTGACAAGACCACGAAATCTCCAAGCGCGGATCCAGGTCGACGGAAAACCGTGTTCCGCTACATTCAGAGCCACG	Site17	7	WBGene00004418	rpl-7	F53G12.10	rpl-7 encodes a large ribosomal subunit L7 protein required Concise description: rpl-7 encodes a large ribosomal subunit L7 protein required	Ribosomal Protein, Large subunit
I	111208	111209	4a16c5b8-4b08-46c8-8f18-168a9cf2514c	86	207	+	GAGAGCCGATGCCCGTCCTGGAACTGTCCATTCTGTGCTGTTGGTAGGTGCCTGTTGGTGTGGTGGTATGTCCAGAGGTTAGGTGTCCCAGAGGAACAGACTCTAAGCGTGAGTTGAGGCCAAAGACTTACACACGTTCCGGTGGACGGGTCGCCTTCGTCGCAAGAAATTCGCGGTAACCCAACCAGCTCAACACGGCCAAGAAAG	Site17	7	WBGene00004418	rpl-7	F53G12.10	rpl-7 encodes a large ribosomal subunit L7 protein required Concise description: rpl-7 encodes a large ribosomal subunit L7 protein required	Ribosomal Protein, Large subunit
I	111208	111209	22c8b7bf-e4e0-463e-8528-aeaa1a9a98db	84	226	+	GAGAGCCGTACCGGCCTGCCACGCAAGGCTGCTCATACCGGGGTGTTCATCAATCTTTGGAACAAGAGAAAGAAGACCCAATTCAAAGCGTGGTATACAATGCCAAGACAGAGAGAATGCAAGGAAGAACAATGTTCCTGGGGAGTTCGTTCCAGCTGTACCGGGTCGCCTCATTGTCGTCAGAATTCAATGATATATTCATCCTGGCTTTATCCAAGCCATGGTG	Site17	7	WBGene00004418	rpl-7	F53G12.10	rpl-7 encodes a large ribosomal subunit L7 protein required Concise description: rpl-7 encodes a large ribosomal subunit L7 protein required	Ribosomal Protein, Large subunit
I	111213	111214	6d6e3969-d799-4e79-83f8-48864aed9bc0	79	437	+	CCGATGCCCGTTCCACCAAGAATTGTCCACTTAGGGTTGACCGTCGCTAAGAACGAGAAGAAGACCTTGCTGAATCGCCACCAGGAGTACAGAAACCAAAAGCTCGGACACGTGGCGAGGCCAAGACCATCCCGGAAGGTCACGAGGTCTCGTTCGTTACCGGAATTCGAAGGTTATACCAAATTTACCAAGCCGAAGAAGTTTCCCAGATCCTCCTCGTACGACAGATTAACAACGGTTCGTTTAAGCGGCAACAAGGCTACTTCCCGTATTTCAGCCATCCTAGCTTGGGTTATCCAAAGACATCCACGATTTACAAGCATGGATATCCTGATTGACGGAAACTGTCCTAATTTCTGGTATCTGTTGGCAGAGCACCGGAGTACTAACATTGTTATA…	Site17	7	WBGene00004418	rpl-7	F53G12.10	rpl-7 encodes a large ribosomal subunit L7 protein required Concise description: rpl-7 encodes a large ribosomal subunit L7 protein required	Ribosomal Protein, Large subunit
I	111229	111230	692790e3-27df-4715-bc34-8e7f849c093c	103	435	+	GGCTGCTCAACATCAAGGTGACCGTTCGCTAAGAACAAGGAAGAGTTCCTGAACTTGGTGTGTGTTGAATATCCAGAGTACAGAAACGCCTCAAAAGGAAGGATCAAGAACATTTGGGTGAGATTGAGGCCTGAGACTTTACCGTTCCACAGTGGTGGTTCAGGTCGTTTCTGTTGCAAGAATTTCGTTGACTACTGGTTCATACTCAAGCCAAAGAAAAGGCTCCAGATTCCATCTTTGTGTTAGATTCATCATCAGAATTCGTTTAGGTAGAGGCAGGCTACTTCTACACCATGTATTATGGGCATACGTAGTTCAAAAGGTCAACACCAAACTATCAGACCAACCACCGGCTTTCCACCTTTCTGGAACAGAATACGTCAGGTTGACGGAAACCGC…	Site17	7	WBGene00004418	rpl-7	F53G12.10	rpl-7 encodes a large ribosomal subunit L7 protein required Concise description: rpl-7 encodes a large ribosomal subunit L7 protein required	Ribosomal Protein, Large subunit
I	111229	111230	b14b55a9-1284-4e9c-b28b-1cbe19c02b4e	102	453	+	GGCTGCTCATCAAGGTGACCGTCATACCGCTTAAGAACAAGGAGAAGAAGTTCCCAATTCTCAAGCGTGCTGAGAAATCACGTCCAGGAGTTCAGAAACGCCCAAAAGGAAGGAACCAAGACTCAAGTGAGGCTGAGGCCAAAGACTTCGCCAAATGGTCAGGTCGCTTCGTTTCGCAAGAAATTCGCGGTATTACAAATACACCTCAAAGCACCGAAGAAAAGGCTTTCCGGATTTCCATGTTTTTCGGATTTATGTGAGAGAGAGAGGTGTTGTCGTTTAGGTAGTAACAGGCTACTTCCGTATATCGCGAGCCAACCGTGGTTGGGTTATATAACACCAATTACTCGTCAAGACATCTCATGAATACCACACACTTACGGGTATAGATTCAGGATT…	Site17	7	WBGene00004418	rpl-7	F53G12.10	rpl-7 encodes a large ribosomal subunit L7 protein required Concise description: rpl-7 encodes a large ribosomal subunit L7 protein required	Ribosomal Protein, Large subunit
I	380414	380415	039e9820-b336-4532-8acd-9728f2cce6cc	1211	659	-	GGTGCTTCACTCAATCCTATTTCCAAGAATCCGTCTGCTTAATGAAAGCTTGAGCTGATTTAGTAGTTCTGGGTGACTTATACCCGATTTTCATCATGAAAGTCGACATTGACGTCTGCTCAACAAAATCCCGATGAATTCATTTGGTGAACCATCTTCTTCTGATTTAGCGAGTTTTCTTTCGAAGTTCTGCGCTGCTTAACTTTGTGATTAACTGCGCGGTGTGGGGTGATGTGGGGGGGGGGTACCTCCTCCCCGATGTGCAGCTGGTTAAAGGATTCTTGGCGCCCGGACTTCGGTGCTTCTCGTGGGCAGCTGCTATTACTGCAGCAAATCAGAACCGGCGCAATGGAAGTCAAAGGATGAGGAAGCGGATTCCTCTGCGTGATGACTTCAAAA…	Site59	5	WBGene00004143	pqn-59	R119.4	pqn-59 encodes a protein containing a glutamine/asparagine Concise description: pqn-59 encodes a protein containing a glutamine/asparagine (Q/N)-rich domain and similarity to the vertebrate ubiquitin-associated proteins UBAP2 and UBAP2L; microarray experiments indicate that pqn-59 is expressed maternally and embryonically and in situ hybridization studies show that pqn-59 mRNA exhibits strong ger…	Prion-like-(Q/N-rich)-domain-bearing protein
I	380442	380443	05fed7c6-0fee-49e4-8ead-56fc3c2c582c	1260	868	-	CCGTCTTCAGTTAGATGTCCAGCTTCGAATTGGTTCTGGGGGTGCTTCGTAACGGCTCGGCGCTGATGTGAAGTCGACGGCATTGGCATCCGCTACCCAGCGATCCGATAGATTCATTTTGGTGATCATCTTCTGCTCTCGGCCGATGCGAGTTTTCCGGCCAAAAATCTGGCGCTATTTATTGGCTCTTCTTCTGCAACTGGTGCAACTGACGGTGTGGATGGGGAAAGGTACCTCCTTGGTTGGTGAGCTGCCGGTGTTAAGGATTCTTGTGGATGCCTTGGTGACCGCTTGTGTTGCTTCCGCGATGGGCCAATTGCTGCTACTCACAACGATAAAGCCAGTGGTGCAGCGCAATGTGGGATCAGTGACGAAACGGTATTCTACTGGTTAAAGCCT…	Site59	5	WBGene00004143	pqn-59	R119.4	pqn-59 encodes a protein containing a glutamine/asparagine Concise description: pqn-59 encodes a protein containing a glutamine/asparagine (Q/N)-rich domain and similarity to the vertebrate ubiquitin-associated proteins UBAP2 and UBAP2L; microarray experiments indicate that pqn-59 is expressed maternally and embryonically and in situ hybridization studies show that pqn-59 mRNA exhibits strong ger…	Prion-like-(Q/N-rich)-domain-bearing protein
I	380462	380463	31c38ff2-a85c-4ee4-98de-9ff64a85dccc	1335	422	-	CATGCTTGATTTGGTTCTTGGAAAGTGCTTGTACATTTCATCGTGAAGTAAAAGTCGACACACACATTAGACATCCGCCCTTCAGCCAAAACAGTAATTCATTTGAAAAAAAAACCATCTTCTTCTTGCTAACGAGTTTCCGGCTCAAAGTTCTGCCATGCACCAGCTGCTAGCTCTTCTTTAATAACTTGAACAACCGATGGAAAAGTGAAGGTGTTAAAGTGGTGGGAAGTAAAACCTGATGTCTACCAGTTGTAGTAATAAAAGAATTCTGACCTAGAGACTTCCCAGAGTACTTCTTGCAGTAGGTGCAACCACCACTACTATAACAATAAGATCTTGAACCGGCACAAAAGTGGTAACTATGAAAAAAAACGAAACGAGATTCTTAACTTCGAA…	Site59	5	WBGene00004143	pqn-59	R119.4	pqn-59 encodes a protein containing a glutamine/asparagine Concise description: pqn-59 encodes a protein containing a glutamine/asparagine (Q/N)-rich domain and similarity to the vertebrate ubiquitin-associated proteins UBAP2 and UBAP2L; microarray experiments indicate that pqn-59 is expressed maternally and embryonically and in situ hybridization studies show that pqn-59 mRNA exhibits strong ger…	Prion-like-(Q/N-rich)-domain-bearing protein
I	380496	380497	aa0ac6b1-894c-4aec-a848-1e2869fd8eca	1242	574	-	TTTCATCGTGATGTGAAGTCGCAGCACATTGGCGTCTTTCCTCAACAGTACATATTCATTTTGGAAAACCATCTTCTTCTCCGGCTGTTGTAGCGTAAGTTCAGCATGACTTCGGCGACCATTATTGGCCTTCTTGACTTGTGCATACAAACGATGGAAGTGGGTTGGGAACTCCTTGATGCGGAGATCCCGCTGGTTGAGGATTCTGAGCCTGGTCGCGTGCTTCTTATGTAGGCGGCTACCAGCAAAATGAACAGAGCCGGCGCAGTGAAGTGAAGGGAGCCAGATGGTGACGGATTCCTCTTCCGGTAAAGAGCTTTGACTCGGAAGATCCACTTAGTCTCATTCTGACCAATCGCCAAACGCGTCTCGTCGATGCTGAGTGGAGCAACAGCCAGA…	Site59	5	WBGene00004143	pqn-59	R119.4	pqn-59 encodes a protein containing a glutamine/asparagine Concise description: pqn-59 encodes a protein containing a glutamine/asparagine (Q/N)-rich domain and similarity to the vertebrate ubiquitin-associated proteins UBAP2 and UBAP2L; microarray experiments indicate that pqn-59 is expressed maternally and embryonically and in situ hybridization studies show that pqn-59 mRNA exhibits strong ger…	Prion-like-(Q/N-rich)-domain-bearing protein
I	380496	380497	e388e8ec-318a-4f97-9663-ca1e2199b38d	1489	836	-	TTTCATCGAAAAATGGTTGAGTCGATTGGTGGCATCCGCCTCAGCCAGTACTAATTCATTTAATGGTGAAAAACCCGTCTTCTTTCTTGCCGATACGAGTTTCTGGCTCGAAGTTCTGGCACCGCTGCTGCATTTTCTTCTTAATCGGTGACAATTCGTGCGAAGTGGAATGTGGGGGAAAGGAGGTACCTTCCTTGGCGTTGGATGGATTTGGTTGTGGGATTCTTGGGCCTGGTGACTTGAGTGACTTCTTTGGCAATGGGGCGAATTGCTACTTCGATAATAAAATCAATTTGACCATGCGCAAGTGATGTGGGAACCATAGATGGTAACGGATTCTTCCATTCAGGAAGTGAAGCCTTCGTGAGGTCTGATGTGTGGTAACTAGACTCTGGTATC…	Site59	5	WBGene00004143	pqn-59	R119.4	pqn-59 encodes a protein containing a glutamine/asparagine Concise description: pqn-59 encodes a protein containing a glutamine/asparagine (Q/N)-rich domain and similarity to the vertebrate ubiquitin-associated proteins UBAP2 and UBAP2L; microarray experiments indicate that pqn-59 is expressed maternally and embryonically and in situ hybridization studies show that pqn-59 mRNA exhibits strong ger…	Prion-like-(Q/N-rich)-domain-bearing protein
I	503020	503021	80b80887-f8f5-42a5-a7db-638505f776c5	116	509	-	ATCTGGTAATCACTATAAAGCATCGTCCTTCTCTACGTTGACGGAATCCTGACGATACTTATCAATTGTTTTGTGTGGAAGGACTGCTCATTGGTGCTGGTGGTGGGAATTGAGGATGCTGTATTACGCTATTCGCGGAGCCTTCTCCCATAGCATATCTGACCATGCTGTCGCCGGCTTTTCCTGGAATCGAGCAGTTTTACGGCGGCTGGCGCAAAATTGCTGATCGGGTATGGCTGATCGTCACCCGCAGTTATTGCGGCCTATCCGTAAATTAACACCTGTGTTGTTGGTAACAACAATCATTAGGCGTCTACAAATCGAATTTCATTCTCTTATTAAAAAACTATTTATTGAGTAAAGTCCATAACGTCCGCAGAGAGCGGGTACTAATAGAGG…	Site78	6	WBGene00022036	Y65B4BL.4	Y65B4BL.4	none available	not known
I	503039	503040	27ef9b78-e186-40b3-b7b4-660628f885c0	105	611	-	TTGCCTTTTCTATTAATATTATATTAGTTCACTTAATGATGCAGCTTTACGCTTCCTCATCCAAACTCCAAATGACGAAGAATCACGTGAGCGAATACAATCGATTTATGAGTTTTTGAGGAGTAAGAAGCTGCTGAGCTGAAGGGAATTGAGAAGTATGTGATAGCACAATTCGATATGAAGGGAGAACAGCTCGTATAAACAGCTGTAAATCCCTAAAACGCAATTACGCCGCTTTTCCTGGTTCGAAATTAGTTTTGCTTGCGAATTTGAACGTCGAAGGCTATTTTGGTAGTCGAGGTTGACGGGTCGCCCATCATTTTGGTAATATAGCACGCCCAGCCAAAATCACAAAATAAATAACTGCCACACTGAATGAATGGGAAAAACGACAGTCGG…	Site78	6	WBGene00022036	Y65B4BL.4	Y65B4BL.4	none available	not known
I	503042	503043	7ad021cd-071f-45c7-810b-72522b33d9db	137	627	-	CCTTTTCTATTATATATTATATATTAATCACTTGATGATGCGCTTCCTCGTCCACGGTCTCCAGGATGCGGATCCAGGATAAATACTGATCGATTTGATTTGGTGAGTATGTGCTGCCGGTGCTGGAATATTGAGGTGATGCAGGATACACAATATTCGGTTGTGGTGGTGGAGGGGAAAGCCCAGCTCGTTGAGCAGCCGTAGACTGATTGATTTGACGCTGGCTTTCCCCTTGGAGGGTTCGAAGCAATTGCTGGCGGATATTGGACGTCGAGAGGCTGCTATTAAGAGTACGGGAATGGATTGATCGCCCTGTCACCGGTAATAGCGCCTGCCGATTCAAAATCCGGTAAATATGAATATAGACTGCCACACTTTGATGGGAAACAACAGCTTGCG…	Site78	6	WBGene00022036	Y65B4BL.4	Y65B4BL.4	none available	not known
I	503047	503048	8dce5826-1659-47fe-bd38-53539c9ae24f	184	634	-	TCTATTATATATTATATTAATCACTTGATGATGTATGCTTGCGCCACCTCGTCAATGTCTCCAGTAACGGAATCCAGTGGCGATACATATCGATTATGTAATTGGTGTGGTGGTGCTGCTGGTGGACCGGAGGGAAATCAACGAGGAAGTAGCAGTGGATATTTCGCAATTCGATGGTGGAGGTGCCAGCTCGTTGAACAGTCGTGAAGGATCCGAGAGGATAATTAACGCTGGCTTTTCCCTGGGAATCACGAACTTACTCGCTCGGAACCGGACATCATGTGGGACCATTTACCGGTAACGCTTGGAAATGGTGAGCTGAAGTCACCTCATCACTTGTAATAGCCAGCCTTAACCCCCAAATCCGTAAGTCGAAATAAACTGCTCACTTTGGTGTAT…	Site78	6	WBGene00022036	Y65B4BL.4	Y65B4BL.4	none available	not known
I	503047	503048	d15b3009-c48f-4dd3-bdfb-b62435258133	102	620	-	TCTATTATTATTAATCACTCAGATGACGGCTTGCACTTCCTCCTCGTCCAAGGTCTCAAATGAACGGAAATCCACGGCGATAATACTGATCTAACAGATTGGAGTGAGGTGCTGCCGGTGCTGGTGGAGGGAGTTGGAAAATGTCAGCGGATATTACGCAATTCGCACGAGAGGTGGAGGTATGCCCATTGCTCGTTGAGCACCGAAGATACTGAAAGCAAGCAAGCGCTGGCTTTTCCTGGAATCACGAGCCAGTTTACCGACGTGGATTGGACGTCGAGAGGGCAGCTAGGTGTCGGGTGTTGGCTGACGCCTATCGCTGGTAATGCCGCATCGTATTTCGATCCTGTGGTAACAAGTTATGACTGCCCACTTTTGGATGTTGGAAAAACGACAGTC…	Site78	6	WBGene00022036	Y65B4BL.4	Y65B4BL.4	none available	not known
I	503067	503068	4377ba24-fb72-4b9e-a0f8-1c794c872951	157	533	-	ACTTGATGAAGTATTGCGCTTCTTCCTCGTCCGCCACGGTCCAGATGACGGAGCCGCGGCGATACTGATCGATTATTGTTTGGAAAGGAGCTTATATGCTGCTGAGCTGAAGGGCAAGATGGACGATTACGCAATTCGACGATGGAGAAGCCCAGCTCGTTGGTATTTGATCCGAACAAATTGCTGCTTTCCGGAACCTAAACGACGGATTGGTGCGTCGGCTATTGGTAGTCGGATGGCTGCTGATCGCCCATCGAAATAACGCCTAGCCAAATCCGTAGAAAATACGATAGACTGCCCACCAGGATGATGGTTGGGAAGAACGAAGCGCAAATCGCATCCCAACAAAACAGCAAAATTTTCAGATTCTCCTTGAATAAAAGCTTTTTATTGGTAAAA…	Site78	6	WBGene00022036	Y65B4BL.4	Y65B4BL.4	none available	not known
I	532244	532245	668d3ce7-9bd4-4e80-8e98-b1048ae9f655	413	957	+	AAGGAGCAGTTCATCGACTCCTGAGGATAACAGAAGAGCACCACCTGGTTTGTTGATGCCGTTTCTCAATCAGGTAGTACCCTGTATTCAAAGGTTTCGAACGCTGACTTTCTCAAAGTGCGGAACATTAGAAGTTCGGCTCACATCTTCATTGTCTTGTTCCTACCGTTAAGTACTAATGATGACGATTTCTCAAAAACCGTCATTAGGATACACAACTAACTGTACAGCACATTGTCACAGCAAAAGCTCGTCGCCGAAGAATTACTGATTCCGAATGACCCAGCGTAGCCCGCGAGCTGGCAGTATCACCTTAATAGCACAGCCGCCAACCAATATTGTACTGTGATTAATCCTCATTCTGTATGTTCAATTCAGAACTTGGTGCGGGTGATTATT…	Site85	8	WBGene00022033	Y65B4BL.1	Y65B4BL.1	none available	not known
I	532255	532256	500c466f-e9f1-40df-a3b1-67e1f942f0ca	646	848	+	CATCGACTTCCTGGGATATCAGAAGAGGAGCACCACCTGAGTCGGTGATGCCGGGTCACCGTTCAGGAGATTTCCTGAACCACCGAGGTCACCGACGCTGGCTTTCCATGAGTGCGGAACCGAGAAGTCACGGCACCAACTCTCACATCGTTCTGTCCCGATGGCCGATGACGTCTCTTCCATTTCCAAACAGCCGCCATTCAGGATACCACACCAACTGTCCACGGCACTGTCTACTCCAAGCTGCAAGGACCGTACCGCTCGCTGAAAACACTGATTCAGGCGTGATCCAGCATAAGAGTCGCTGTTCTGCAGTACTTCAAAACTGTTCACTGTGCCAACCAATATGTACTTGTGTTGTTCCAACCTTAGCATGTCAATCGGAACTCGGCGTCGGCG…	Site85	8	WBGene00022033	Y65B4BL.1	Y65B4BL.1	none available	not known
I	532256	532257	863cd21b-6f6f-4b1a-8696-d12cd24136c3	608	902	+	ATCGACTCCACTGGATAACAAGAGTAGAGCCTTTCCTGGTTGTTGATGCCGGGTTTCAGCAGAAGTACCCGAACCTTAAGGTCACCGTTCCGCTCTCCAAGTGAACAAAGAAGTTCCGCACATCTTCACCGTACTGTCCGCGGTTCGGCGACGACGTCACCTTTCCTTGCTGTTATCAGGTTCCAACTGTTTTACAGCACTGGCCATCAAGCATTGGGCATGTCATCTGAACTTAGTTACAGGTGATCCGGCAAGAGCTCGCCGATGGCAGTACTTCCAATTGTTTACTGCCGCCAACCAATTGTACTGCTGCTCCTCAACCTTGGTACCGTATCAATCAGGAACTTGGTGGTCGATATCCGTATGTAACTGTTCCCCTGCGTGGAGACAACTGGTGGG…	Site85	8	WBGene00022033	Y65B4BL.1	Y65B4BL.1	none available	not known
I	532282	532283	17f31afa-aa53-4824-bba7-1b096741a931	456	839	+	ACCACGAGTTGTTGATGCCGGGGTCTTTTCGGCAAGGGGAGTACCTGTATTTTCTGGGTCACCGACGTAAGGTTCTTCCTTAGGTGGAACAATGGGAAGAAGTCTTCGGCACACAACCACATCGGTCGCCCCGCATGGTTGGCAAACGACGCTTCCTTTCCTTGTTGTTCGCCAACAGGTTCATCTCGTTCAGCTCCTTGGCTTACTCAAGCATTGAGCTGTCGTCGCTGCAGGAAAACTTTGATACCAGGCGATTCCAGCATAAGAGCTTGCGATATGAAGTACTTCACAAAACTGTTTACAATGCCATTACCAAATCGTGACCAACCGCGTGCTGCTCCATCCAAATGTTAAATCCAGAACATGGCGGCGTCGAATGATCGTTGCCTACGAACGCAA…	Site85	8	WBGene00022033	Y65B4BL.1	Y65B4BL.1	none available	not known
I	532319	532320	4dcbf3f9-25c7-411f-bc53-c4d8c37a08b4	494	761	+	TACCCGATTCTTTGGGGGTCACTGACGCCGATTTCCTCGAGTATGGAACTGGAGAAGAAGTCTTCGGCCACCACTTGTTAGCCCGTGCCGATGACGCACTTCCTTTCCTTGCTGTCGCCACTACCGATCCTCATTCCAACTAGTTCACAGCCCCATTAGCACCTACGAGCATGCGGCTGTCACGCTGAAACTTGATTCAGGCTGGCCAGCATGCAAGAGCACTATCGATACGAAGTACCATTCAATTGGCCAACAAATGCCAACCAAAATGTTACTACCGTGCTGCCTCAACACCGGCATGTCAAAACCGAGAACTCATGGTGTATGGCGATATCGCCCTACATGCTCGAACACCGTGCAACTTTCCCCGTCGGGAGTTAGTAAGCTAGAAGGAGGATT…	Site85	8	WBGene00022033	Y65B4BL.1	Y65B4BL.1	none available	not known
I	532337	532338	a92da126-9e73-466c-855a-172d10d63e13	679	805	+	ACCGACGCCGTGAAGAAGTATTTCCGCAGTGCGGATATGGAAGTCTCGGCACAACCATCGTTTGGCACCGTGAATGCCGACGCTTCCTTTCCTGCTGTCGCTCAACAGGATCCATCCAACTGTCACGGCTCCTTGCTTACTTGGACATAAGCATGTCATTTGAAAACAACTGATTTCTCAGGCGATCCAGCAAGAAGAAGATGGCGATAAGTACTCACCAAAACTGTTCGCCAACCAATTGTACTCATATCCAACCTTGCTGTCAATTACAGAACTTTGGCGGCGCGATTGCCCGTAACGTGCTCCCGTTGGAGTTGTGAAAGTCAACAGAGGATTCTGCTGCCAATAACCCTGTCCACTGAACGTCATTTCATGTACTGGTGCAAGTTGGTTTTGCGT…	Site85	8	WBGene00022033	Y65B4BL.1	Y65B4BL.1	none available	not known
I	532337	532338	c005351b-d4ae-457f-b005-f951763f1a18	527	738	+	ACCGACGCCGATTTCCACCGAGTGCGGAACAAAGAAGTCACCGGCACCATTTACCATCGTTTGCCCCGCTGGTCGGCCGATGACGTCTTCCTTCCATTGCTGTCGCACTACGGTTCCACCTCAACTGTACAGCCTTGCACATGAAGCATCGGGCCAAGTCAGGCGCAGTCAGATCTGGCCGGGCGTCCAAATCACGCCGCCGTGCTGCTCCATTCCTTCGGCATGTCAATCGGAACTCGGTGCATCAATGATCGTTGCCTACGACTCCGTGCAACACCCCCGTCGAGACCGTGTAAGCTTACATCGGAAGAGGAGGATCTCGTCTGCCTGTCCAACTGGTAACGTCATCATCAGTAACAGCGTGCCAGAGGTGGTCGTACCATCACTGGACCAACCATT…	Site85	8	WBGene00022033	Y65B4BL.1	Y65B4BL.1	none available	not known
I	532339	532340	636663b1-f1b8-4d83-9055-ea8433bd63d9	387	756	+	CGACGCCGATACCACACCACCGAGTGCGGATTAGAGGTACCTGCTCCATTCTCCTTCGGCTTGTCCCGCGGACCGACGATGCGTCTTCACCACCTGCTGTCGCCATCAGGTTCCACACCAACTGTTGGGTTGGCATGAAGAAGAAGTGGTGAATTGATAGGCGATCCAATAAGAGCTTGCTAGAGGTCATGTAGTACTTTCCTTAATTGCTTACTGGTGCACTACCAAACTATGACAACATTTAACGTGCTGCTCCTTAACCTTAGCTATGGTTAAACGTGAATTAGCGTCGGCGATATCGCCTACCGTATGTCAACTTCCCTGCCGAGACAAACAGCTTGATTTTCTCGTCTGCACAGCCACAACTGGAACACGTCATCATGTAACTGGTCAGAAATG…	Site85	8	WBGene00022033	Y65B4BL.1	Y65B4BL.1	none available	not known
I	532401	532402	8443baaf-53d0-4113-a875-a5e01b9f8bef	558	659	+	TGTCCCGCGTGACCGGCCGACGACGTCACCTTCCACACCTGCTGTTCGCCATCGGGTTCCATCCAACTGTTCCATCAGCCTGCACCTACGGCATGAGCATGTCATCAACATGAAAACACTGATCAGGCGATCCAGCAAGAGCTTGCCGATGGCAGTACTTCTCCTCCAATATCCTCTACAATGCCAACCAATTGCGATATCGTGCTGCTCCATCCTAGCTCGTCAAAAACACGGAACTCGGCGTCAGCGCGATTGCCCACGTGCATTTCCCCGCGCGCGCGTCGGGACAAAGTTGGCTAGAAGAGGATTCGTCTGCCTGTCCAAGAGAACGTTATATTGTAGCCAGTTTTTGGCTTTCTGCGAGATCATTATTCCAATTCCTGTGGTAGGTGGCAAGGT…	Site86	6	WBGene00022033	Y65B4BL.1	Y65B4BL.1	none available	not known
I	532441	532442	c4a9dea1-21f3-42e0-89d2-c730488c441a	355	677	+	TCGCCAACGGTTTCCACTACCAACTAAATACAGCCTGCACCAACGGGAACCGTGAGCATGTTCTGAAACTTGATTTCCACACGATGGCGATCCGGCAAGAGCACTGCGATTGAAGTACTTTTTTCCAAACTCAACAGCCAACCATTTAAACTTTGACAACCGCGCGCGTCGTTAAATCTCCAACCACCGGCATGTTAAACTCGGTGATTGTTGGCGTGACTTATCTGCCATCTGTGCTCATCCCGTCTGATTCGTGATTAAGCTACCCATACATTAACGAGAAGGAACCGTCTGCCTGTTCCAATAACGTTTATTATGACTGTCCAGGCGGTCTCATGTTCACCATTAACTACTGTTCCATCCCCGCTCACCGTAGCGGGTAAATTCAGGTATTGTTAA…	Site86	6	WBGene00022033	Y65B4BL.1	Y65B4BL.1	none available	not known
I	532485	532486	4b392a1a-ad85-4d0e-bee7-55af2b3aa033	567	556	+	AGCATCGTGAGCATGTTCGCCGCTGAAACTCTGGATTCAGGCGATCCAGCAAGAGCACTGCGATAATTGATTTCCAAACTGCTCTGTGCCAACATGCTATGGCAACCGCGTGCTGCTCCAACCACTGGCATGGGCTCAATCGGAACTCGGCGTCGGCGGTTGTTGCCATCGAACGTGCAACATACACCCGCGAGGGACCGTAGCTCTATAGAAGGATTTGGCTGCACTGTTTAACTGGAAACGTTATGGTAGTGACAGAGTGGTTGTTACAACTGTTATTATCACCAATACCGAAGCAGGTAGGGTTAGGTAATTAATAATTATCGCTGTTAAAATAATTACTCTTTAATTTTGCTTCCTTTAACACTTTAGATATTACTACTGAACTGCCAGCAACTA…	Site86	6	WBGene00022033	Y65B4BL.1	Y65B4BL.1	none available	not known
I	532501	532502	f5dd426c-dee5-417c-bd40-2a9cc068322d	866	572	+	CGCCGCTGAATACTGATTCAGGTGGTCCGGCGTACTTGAGCTTGTGTCGAAGTACTACCTTGTTCAATGCCATTCACCAAAACTGCATTGCGTGTTGTTCCAACTTCAAATATGTCAATTCGGAACTTGGTGTCGAGCAAAGGCTATTGCCATGTATGTAACATTCCCTAAGACTCGTTGCTAAGCTTCTGATTCTGCTTGTCAGCTCAACTGAACGTAACAAGTATAGCGACAGAAAGTTTTGTTCATTAAGATCATCCCTGTTACCTGTTGGTGTTCAAGGTTGTTAATAATAATTCGTTGCTGTTAAATTTTTCAACTCTCAGCTTTGTTCCTCCTTCTAACAACATCATCAAAGTGACTATCGAACTGCCAATACTACAAGTTCTAAGTACCAAA…	Site86	6	WBGene00022033	Y65B4BL.1	Y65B4BL.1	none available	not known
I	532501	532502	26a344e9-dd09-4edd-ae94-76be3d6fc9cf	877	627	+	CGCCGCTGAATTACAACTGACCAGGCGATCCAGCATCAAGAGCACTGCGATGGCAGTACTTTCCAAACTGCTCTACAGCCGCCACCAACCAATTCGTGTACAACCGCGCGCGCGTGCTGTTCCAACACCTCAGCCGTTCAAAACGCGGAACTCGGCGTTGCCGATCGTTTGCCTACGTGCATTTCCCCATCGGGAGTTCTGGTAAGCTTATGAGAGGAGGATTCGTCTTGCCTGTCCAACTGAACGTCATTATGTATAGCGCCAGAGTGGTCACGCTTGTACAACAACTGAGTTTTATCCCTGTTACCTGTGGTGGTAGTGGTCAAGGTTGCTAATTGCGGCTTTGTTTAAATTTTCACATTCTTATAATCTTATTGTTCCCTTTTATTATTACTCATT…	Site86	6	WBGene00022033	Y65B4BL.1	Y65B4BL.1	none available	not known
I	532501	532502	da9b5430-5540-41ae-8e90-0890326e9bfd	643	554	+	CGCCGCTGAAACTTGATTCAGGCGATCCAGCTAAGAGCACTGCGATATGAAGTACTTCCAAAACTGCTCACTGTGCCAACCAAATCGCGACAACCGCGTGCTGCTTCCAACCTTAGCATGTCAAACACGCGGAACTTTGGTGCATGGTGTCGTTGCCTACGGCGTGCATTCCCGTCGGGGAAGACATGATAGCTATCGGAGAGGATTCGTCTGCCAACGGTTCAACTAACGTTAACTGCCGATTAGTGTCAGAGAAGTTACTGTCATTGACCAACCTGTGGTGGTAGCTTCAAGGTAATAATTAATTGCTGTTAAATTAATTACAACCGTATAATTTGTTCCAACAACATCATTCGGTGATATTACTTTGATTGCCACAGCATAAGTTTTATAGAACCA…	Site86	6	WBGene00022033	Y65B4BL.1	Y65B4BL.1	none available	not known
I	532511	532512	599283ee-2d84-4b03-8cc9-addfff617121	689	608	+	ACTCTGATCCAGGCGATCCAATACAAGAGTCATTGCGATCGAAGTACTTTCCTCAAACTGCTTTACTGGTGCCAACCAAAACCGACAACCGCGTGCTGCTCAACACCTAAATGTTTTAAACGTGGAACATATGGCGTTGGTGATTACTGCTGCCTCTGTAACAATTCCCCGAGAGTTGAGTATTACAGCTTAACAAGAAGGATTCCTCGTTTGCCCAGCCTCACCATCTATTGGAACGTCACTCAGTAACAGTGCTCAGAGTGGTTTCGGTCTTTCCATCATTAGACCAACATCAACCCCTGCTTTCCCGTAGCGAAGCTGGCTCCAGGTTTGTTAATAAACTATCGCCGTTCGTCAATAATTTCCTTTCCTCAATTCGTCCCCCTTCACAACTCTACT…	Site87	7	WBGene00022033	Y65B4BL.1	Y65B4BL.1	none available	not known
I	532527	532528	b32ec623-4f87-47ae-986f-65482ada0b3d	894	578	+	TCCAGCAACAAGAGCACTGCGATTACGATAGATTTTACCCACCAAATTGCTTGTGCCAAATTCGATATGCGTGCTGCTCCCTCAACCTCAGCACTGGTCAATCAGAACTCGGGTCGGCGATCATCCGTTGCCTAGGCGTGCCAGGCGGATGGCGGGGACATAGAGAGAAAGGATTTGTCATGCCTGTCCATAACTGGAACGTTTATGTATGGTGCAAGAGTAGTCGCACCATCAAAGACCATCGCCCGTCACCCGGCAAGCTGGCTCAGGTTGTTAATATAATAATTCGCCGCTCGCTTCTAATAATTTTCATTCTTCGGGCTGCTCCTCAACATTACATCATTCAGTGATATTTATTTGATTATCCGATATTATCAGTTTTTCTAAAGTACCCTATTA…	Site87	7	WBGene00022033	Y65B4BL.1	Y65B4BL.1	none available	not known
I	532527	532528	0d27b9c1-ff37-4a9b-b1dc-710207e7ebce	662	570	+	TCCAGCAAGAGCTTAGGCTGTAGTACTTTCCATAAACTGCTGGCGTGCCATTAAACCGTACTCGTCTGCTAGCCACACAGCTATGGCTCAATACGGGAACTAGCGTTGGCGATATTGCACACGCATGTGTAACTTTCCCGTTGGGAGACCGTTGGTGAGCTCTATCGGAAGGATCTTTGTTGGTCAGCACAACTGGATCGCAACATTAGTAGTGTAGGCAAGAATAAGTTACTGTCATTAGTCTATTATCCCTGCTACTTCCTGTAGTGGTTCTGATTGATTGCTGCTTGTTAAAATTTCTTATTCTTAGTTACTGTTCCTTACAACGCCGCCAACCCATTACAGACATTTATGGTATTGCCTGGTTAACAATAAAGATCTTCTTTATAGAGATTCCTT…	Site87	7	WBGene00022033	Y65B4BL.1	Y65B4BL.1	none available	not known
I	532527	532528	4d7a6669-ac53-47ab-b681-10cc107e064f	250	568	+	TCCAGCAAGAGCACTGCGATATGAAGTACTTCACCAAACTGTTCATTGGTGTCAACCAATATGACAACCGTGTGTGTGTGTTGTCCAACCTCGGCTAGGTCAATACCGGAACTTTGTCGTCGGTGCTGTTTGCCCTACGAACGTGCATTCCCCGTTTAGGACAACGTGACTGGGGTTCTGCGGAGGTATTTCGTCTGCGGCCTGTCCCAAACTGAACGTCATTATGACTGATGTCCAGGTGGATTTCTCGAGGTCTCTTAAGTTCATTATCCCGTTTTCCGTAGCTGGTAGTTCAGGTTGTTAAATAAATTCGCCGACATGTTAAATAATTTTCATTTTCGGCTTTTGTCTCCCTTTTAACAACACTTCATTTAGAAGTATTTATACTGACTACATGCC…	Site87	7	WBGene00022033	Y65B4BL.1	Y65B4BL.1	none available	not known
I	532535	532536	3af8613f-4c8b-43e9-8908-f284aa70277f	929	561	+	GAGCACTGCGATATGAAGTACTACCACAAAACATTGTTCAACGGTGCCATCAATTGTTACTACTCGTGTGCTATCCATCCTTAATACGTCAATTCCGGAACCGAGCGCAGTCGGCGATCGTTATCCCCACGAACGTGTGCATAACATCTCCCGTTAGGTATCGTAAGTAGCAAGAGGATTTTGCTTGCCTGTTGTACGTCCAACTGGAACGTCATTACTTGAACAGCGAGAGGTGGTTTCTTGTCAACCATTAACTGACCATTATCCCTGCTCTTTTCCCGCAGCGGTTACAGTCAGGTTAATATGCTGTTAATTTTTACGAATTTGGCTTCCTCTATAACATCAACCGAAGTATATCATTACTGATTATTGCCTGACAACATTGACTAAAGTACCCAG…	Site87	7	WBGene00022033	Y65B4BL.1	Y65B4BL.1	none available	not known
I	532535	532536	ec45b78e-1722-4201-b784-a3ac7e4a01fb	919	620	+	GAGCACTGTGTTCGTAGTTACCACCATCAATTAATCCTCTGTGCCAACCGCTATCGTACAACCGCGTGCTGCTTCCATACCGAAATGTTAAAACGTGAACTTTGGTGCATATGGCGATTGCCCATACGTATGTAACCACCCCGTGGGAGACAACTGTAAGCTCGAGAGGATTCTGCGTCGTCCTGTTCCAACTGGAACGTCATGATTAAGCGACGAAGAGTGGTTTCTGTACCATTAACTGAGACCATTAACATCCCCTATCACCCGTAGGTATTGGCTCAGGTTGTTACTGCTAATATCGCCGTTTATTTCACTGCTAATTTTCTTCACTTCTTCCAATTTCGTCCCTTCTTCTTTAACAACATTACCACTTTCCGAGGCAGTACTCATCAACTGAAC…	Site87	7	WBGene00022033	Y65B4BL.1	Y65B4BL.1	none available	not known
I	532544	532545	b9e5550f-6fa1-453c-a4fa-3e80fdd56368	682	583	+	GATATGAAGACATTTCCACCAATTGCCACAACAGCCGCCAACCAATCGGCAACCGTGCGCCGCAACTGCACATTCTATATCATGTCAAACGCGGAACCGGCGCGCGGCGATCGTTGCCTACGTGCAACTTCCCGCAAGGGAGTTGTAAGCTTAACCGAGAAGGAGGATACCGTACATATCCTGTTCAACTGGAACGTCATTATGTAACTGTGCAAGGCTGGTTTTGTCACCAACCAACTGACACTCATCCCCGTTTTACCTATAATAAGCTGGCTCAGGTTGTTGCTGCTGCTCGCCGCTTATCGTTTTTAGCTGCTACCTCATTACCGTCATCCCTTTTATTTACTTCAACCATCGGCTGATATTCATTCGACTCGCCCGACTTACCGGTTCCTTATA…	Site87	7	WBGene00022033	Y65B4BL.1	Y65B4BL.1	none available	not known
I	532990	532991	90a54003-3aaa-4c29-976b-5171eae500c2	1077	155	+	CTGAACCGCCTGTCACATCACCGGTTCCTTTATAGACCTAACAGGGTTCAAAACCCATCTCCACATCTGTCCCACGTATTTCCCCTTCACATCAAACTATACACCATTGCTCTGAAACGTTGTATCGCCTTAATAAACGCGTATTCCTCTCCCGC	Site88	23	WBGene00022033	Y65B4BL.1	Y65B4BL.1	none available	not known
I	532992	532993	bcd326c3-361b-49ae-98f4-5bb021a10f60	253	219	+	GAACCGCCTATACATACATCAGTCACCTTAGTACCCTAACGGGCTCAACAATTACCCATCTCCTTTCACCGTCCCACCGTATTTCCCTTCAGCAATATACACAACTGCCTACTGAAACGCGTGATATGCCTTAATAAACGCGTAACTCCCTCTCCCGCCCTCCTCCGTCCGTTACTAATAATTTCCCATTACATCCCACTTGAGGACCTGGTACCAAAG	Site88	23	WBGene00022033	Y65B4BL.1	Y65B4BL.1	none available	not known
I	533026	533027	c7ab93f7-6104-4114-a50c-761218a69cbe	903	157	+	CTAACAGGGTCAACAATCGAACCCAACCTCTCCATGTTCCCTTCCACGTATTTCCCTCCACCAAACTATACCCATTGCTCCTACTGAAACGCGTGTATGCCTTTAATAAACGCGTATTCTCCACTCCCCCGCCCCTCCTCCTCGCACAATTTCTTTA	Site88	23	WBGene00022033	Y65B4BL.1	Y65B4BL.1	none available	not known
I	533030	533031	f8d9c506-d85f-4fdd-9489-b7c4f824f426	7	88	+	CAGGGTTCAACAAACCCATTCCACACCGAATCCCCTCGTATTCCCTCTTAATATTACCAACTATTAATCCATTGAAACGCGTGTTGGC	Site88	23	WBGene00022033	Y65B4BL.1	Y65B4BL.1	none available	not known
I	533035	533036	5569d60f-346d-4a0a-884c-989f38c75d93	11	95	+	TTCAACAAACCCATACCACCACCTTGTCCCACGTATCACCCCTCACGAACTATACACCCGCCTGAAAACGCGTGTATGCCTTAATAAAACGCGTA	Site88	23	WBGene00022033	Y65B4BL.1	Y65B4BL.1	none available	not known
I	533035	533036	344143a5-5d27-4ed8-8567-f46fdd41b86c	13	81	+	TTCAACAAACCCATTCCACACCGTCCCACGTAACTCCCCACCAAACTATACCCATTATCCTACTGAAACGCGTGTATGCCA	Site88	23	WBGene00022033	Y65B4BL.1	Y65B4BL.1	none available	not known
I	533037	533038	6ac9d31c-d2d0-44c0-9acb-94e7994577f2	8	86	+	CAACAAACCCATCCACACCGTCCCACGTATTCCCCCCCCCCCCCCCCACCAATTATTCCCATTGCACTACTGAAACGTGTATGCCA	Site88	23	WBGene00022033	Y65B4BL.1	Y65B4BL.1	none available	not known
I	533038	533039	4f7fada9-1281-40ad-91ec-fc59bce668b0	1332	72	+	AACAAACCCATCTCTGTCCCACGTATTCCCCTCCACCAATTATACCCGTCCCTACTGAATACGAACCGCCTT	Site88	23	WBGene00022033	Y65B4BL.1	Y65B4BL.1	none available	not known
I	533040	533041	720e2ad1-077d-4271-8922-7ce537ed236e	1318	93	+	CAAACCCATTCCTTTCCTCGTTCCCACGTATTCCCCTTCCACCAATTACCTGCCCATTGAAACGCTCACACTAATAATACGCGTATTCCCTTT	Site88	23	WBGene00022033	Y65B4BL.1	Y65B4BL.1	none available	not known
I	533040	533041	104a361d-c330-421e-935f-fb7c576fee6b	1353	85	+	CAAACCCATTCCTTTCCTCGTCCCTCCGTTCCCCTCACCAAACTATTACCCATACTGAAAACGTATGCCTTAATAAACGCGTATT	Site88	23	WBGene00022033	Y65B4BL.1	Y65B4BL.1	none available	not known
I	533040	533041	8ce97f79-fdef-4033-9ed2-2911225125f6	1309	123	+	CAAACCCATCATTCCTTCTCCGCCCCATATTTCCCCCCCCCCCCCTCCACCAAACTATACCCATTGCCCTACTGAAACGCGCGCAACGCCTTAATAAACGTATTCCCTCCACCCCCGCGCCCT	Site88	23	WBGene00022033	Y65B4BL.1	Y65B4BL.1	none available	not known
I	533040	533041	67c76153-4665-4668-ad2e-919b3f7ee6db	864	88	+	CAAACCCATACCACCGTCCCTTCCATATTTCCCCTTCCACCAATTATACCCATCGCTCCACTGAAACGTATGCCTTAATAATGTATTC	Site88	23	WBGene00022033	Y65B4BL.1	Y65B4BL.1	none available	not known
I	533044	533045	c05ab258-475e-4352-a64d-d23cbcf6e2a7	1343	111	+	CCCATCCACACCGTCCGTATTCCCCTTCAAACTATACCGTCCATTGAAAACGTGTAACGCTTAATAAACGCGTATTCCTCTCCCGCCTCCGTTCCGTTTTACTGCAATATT	Site88	23	WBGene00022033	Y65B4BL.1	Y65B4BL.1	none available	not known
I	533044	533045	e0e071be-192e-43e5-92b7-d8d76d91d048	1111	83	+	CCCATCCACCGTCCCTCACGTATTCCCCTCAAACTATTACCTGCCCCATTGAAACGCGTGTATGCCATTAATAAACGTGTATT	Site88	23	WBGene00022033	Y65B4BL.1	Y65B4BL.1	none available	not known
I	533048	533049	a92727cf-7b60-4bfb-b771-a8287e05c2a6	1288	84	+	TCCACACACACCGTCCCACGTTACCCCTCCACCAATTATACCCATTAACGCTCCACTGAAACGTGTATGCCTTAATAATCGTAT	Site88	23	WBGene00022033	Y65B4BL.1	Y65B4BL.1	none available	not known
I	533053	533054	8a416abd-f078-4c03-ab29-b4373588c706	915	74	+	GTATTTCCCCCCCCCCCCCCCTTCTTAATTAAACTCCCATTGCCCTACTGAAACGCGTGTATGCTCTAATTTAA	Site88	23	WBGene00022033	Y65B4BL.1	Y65B4BL.1	none available	not known
I	533066	533067	faba6d7b-7d4d-49e4-9237-cfd3ff77592d	690	51	+	TCTAAAACTATACACCTCATTATCCAACTGAAACGTGTATCGCCTTAATAA	Site88	23	WBGene00022033	Y65B4BL.1	Y65B4BL.1	none available	not known
I	533067	533068	459f3efc-087b-4498-85ca-25d9b5094ec3	1393	57	+	CCAAACTAAACACACCTTGCCTACTGAAACGCGCTAGCGTAACGTCCTTAAATAAAC	Site88	23	WBGene00022033	Y65B4BL.1	Y65B4BL.1	none available	not known
I	533072	533073	9cef192d-096f-4d21-9db2-d2a42b10b8ce	1157	52	+	TTATCTCCTATATTGCCCTACTGAATGCTATGCCACTAATAATTCGTATTCC	Site88	23	WBGene00022033	Y65B4BL.1	Y65B4BL.1	none available	not known
I	533074	533075	db5626f6-a08c-4bb4-9f55-6f2fa2981d44	1219	52	+	TAATTATCATCCAACTGCCCTACTGAAACGCGTATGCCTTAATAAACGTATT	Site88	23	WBGene00022033	Y65B4BL.1	Y65B4BL.1	none available	not known
I	533076	533077	4dc2fdbe-1a47-4272-9d89-1cf6b2a13b58	1207	52	+	GTTACCTACTGAAAACGCGTGTATATGCCACTAATAAACGCGTATTCCCACT	Site88	23	WBGene00022033	Y65B4BL.1	Y65B4BL.1	none available	not known
I	833189	833190	d61ad03f-09ee-483a-9437-2839555956c2	2408	470	+	GGGCGTGCCTGGCCGTACTGTTTCACCAAGAAGAAAGAAGCTCCGAGCATCAAAAGCCGTCCAAAAAAGTGAAGCAAGACGTTAACCTCAAGCTTGCAAACCTCATACTCGTGCAGTAATTTAGTGACTTTAGTCTTTAATTTAAGTTAAATTTCACATCTAATGTCCACATATTCATGACGTCAACTATTGAATTCCCCGAATTGGTTTCTCATCGGCATTTTATTTGTCGTTTTTACACGAGACCAACTTCCTTGTTTACCTACACACACACACACACACACACACACACCACCTTCGCCTCAAAAACCTAACTTCAAACCCTGATGGGTACTTTCTTCCGCCCCCAAGTGGTATTCAATACTGAATTGCTCAACCTTTTTTTGTCTATCAACCCTA…	Site131	8	WBGene00022518	zfh-2	ZC123.3	zfh-2 is a homeobox gene of the ZF (zinc finger class); it Concise description: zfh-2 is a homeobox gene of the ZF (zinc finger class); it encodes three homeodomains and encodes at last 15 zinc fingers; the ZF class is subdivided into several families; zfh-2 belongs to the Zfhx family and is orthologous to Drosophila zfh-2, and the three paralogous human genes ZFHX2, ZFHX3, and ZFHX4 (zinc finger…	Zinc Finger and Homeobox
I	833189	833190	1b58a9f8-13c7-469a-8de4-fff39f34196e	1579	518	+	GGGCGTGCCCCGGCGCTGTCATTTGTTTCACCAAGAAGAAAAGAAGCTACCGTGAGCTAAAGCCATGTGCCAAAAAGTAGAGTAAGACGCTATTCGGGGTGTAAAAACACAACTTGTGTAAAAGCTGTTAAGTGATTACTGTTTTAATTTAAAGATTAATTCTCATTTCTAATGCCTTTATATTACTACTTTTTCGACGTATCGATCCCATAAGCTGATTTTCTCTCTCATCTGTAACATTTGTTGTTACTTTTCAGTTTCAGCTACCACCGACACTTTCACTTTACACTACACTTTACACTTACATCATCACACTCACACTTCTTTCACCACTTGCTCAAAATTTTAACTTCAAACCCTGATTGAGTTTACTTTCCAATCCCCTCAGTAAATTACTAA…	Site131	8	WBGene00022518	zfh-2	ZC123.3	zfh-2 is a homeobox gene of the ZF (zinc finger class); it Concise description: zfh-2 is a homeobox gene of the ZF (zinc finger class); it encodes three homeodomains and encodes at last 15 zinc fingers; the ZF class is subdivided into several families; zfh-2 belongs to the Zfhx family and is orthologous to Drosophila zfh-2, and the three paralogous human genes ZFHX2, ZFHX3, and ZFHX4 (zinc finger…	Zinc Finger and Homeobox
I	833189	833190	056f70ec-7524-4fa8-82a4-88663e5b7756	9	447	+	GGGCGTGCCTGGGTCAACCGTTTTGTTTTCAAGAAGAAGAAAAGAAGCTCCTGAGCAGCCGTATCCAAAGTGATTAGACGCTAACCTCTGGTGCAAACCCCATTTGTGTAAAAGCTTGTTAAAGTGATACTCTGTCTCAATCAGTATTCAATTCCATTTAAATGCACCCTTACCCATGATGATGACGATCCCCGAGTTTCTAAGTAAGTACTCCAGGTACCTGTTTCCCAAGACATAACGCCAATCATTGTTAAAAATTACATAACTTTAAACACCTGATTATGAGTTACTCTCGCTCCTTAAGAGTAAAATTACTGAAAATATTAAACTATACCAACTTGAACATAACATCAACACTCGTTATCAAACACCTCACTTCCTCTACTGTTATTGAGTATC…	Site131	8	WBGene00022518	zfh-2	ZC123.3	zfh-2 is a homeobox gene of the ZF (zinc finger class); it Concise description: zfh-2 is a homeobox gene of the ZF (zinc finger class); it encodes three homeodomains and encodes at last 15 zinc fingers; the ZF class is subdivided into several families; zfh-2 belongs to the Zfhx family and is orthologous to Drosophila zfh-2, and the three paralogous human genes ZFHX2, ZFHX3, and ZFHX4 (zinc finger…	Zinc Finger and Homeobox
I	833230	833231	864a9347-93d9-46a6-a9cc-2947529ae067	1208	319	+	AAGCTCCGTGAGCATTAAAAGCCACCGTGCCAAAGTGATAAGACGCTATCACCGCGGGTGCAAACCCTTGTGCTGGGTTGTTAAGTGATTTTGTTTTATCCGAGTATTGCTACCATTTCTATGCACCTCTAACATTACGATGACGCAACAATTCCCCGGTAGTTTGTATCATTTTGTCGTTACTCAGGATTTATTTGTCTGTTCAAAATTTTAACCGCCTGATAAGTTACACTCCATCCCCAAGTAATTTTGAATCGCTATCTCGATCAACCCGCTCGGCCTGTTCCCCAAGTATGACCTGGACTGCTTGATACTGTTA	Site131	8	WBGene00022518	zfh-2	ZC123.3	zfh-2 is a homeobox gene of the ZF (zinc finger class); it Concise description: zfh-2 is a homeobox gene of the ZF (zinc finger class); it encodes three homeodomains and encodes at last 15 zinc fingers; the ZF class is subdivided into several families; zfh-2 belongs to the Zfhx family and is orthologous to Drosophila zfh-2, and the three paralogous human genes ZFHX2, ZFHX3, and ZFHX4 (zinc finger…	Zinc Finger and Homeobox
I	833233	833234	b18feb86-c991-4dc8-9ca4-21a9a08a387b	52	351	+	CTCCGTGAGCATTCAAAAAATCTGCCGTTTCCAAAGTTGATATGGATGCTAACACAGCTCGTAAAACCTCTACTCTGTGTAAAGCTGTTAAGTAGTACTTCTGTCTTTAAATCCGAGTATTTAATTCCACATTCTTACATCTTTTTTTGTTGCCACCTCATGCGATGCCATTAACAAATCCCTAATGGTTTTCCATCAGTTACTTTTATTTTGCCGTTTTCTTTCAAGGACCTGTTACCATGTTTCTTACACACACTTACACTTTCCTTTCTGCCTTTAATTACTTAACCTTATCCCTGTTCTGAATTCCCGCCCCCCTGATATTTACCCATAATAATATATAAACACCCA	Site131	8	WBGene00022518	zfh-2	ZC123.3	zfh-2 is a homeobox gene of the ZF (zinc finger class); it Concise description: zfh-2 is a homeobox gene of the ZF (zinc finger class); it encodes three homeodomains and encodes at last 15 zinc fingers; the ZF class is subdivided into several families; zfh-2 belongs to the Zfhx family and is orthologous to Drosophila zfh-2, and the three paralogous human genes ZFHX2, ZFHX3, and ZFHX4 (zinc finger…	Zinc Finger and Homeobox
I	833234	833235	18d30196-8c88-41f2-a0ac-d6c55c3fbe64	1315	396	+	TCCGTGAGCATAAAAATCGTGCCAAAAAGTGTGACTGTTCAAGTGATTTCATTGTTTTAAAAACACCAAGAACCAATTCCATTTGCCGTCCACAACAACATACTACTACCACGACGCCACTAACAAACCCCAATATGGTTTCCAACCGTTACTTCATTTGCCGTTCAGGACCGTTACCATCACTTTTTTCCTCTTTGTTTAAAATACTTATTCCATCCCTGATTGGTAGAGTCACTTCCATCCCTAAGTAATTTTTTAGTGGTTGCATCCACTTTTTGATACATACTTCACTCCGTGCCAATCCCCTCCCCACTGTCATGACACATAGTTTTGCTAGTTTCTGCTACCCTATTGTATCTGAGTTCTTTAAATTACATGAAGAACCTGATAATATGG	Site131	8	WBGene00022518	zfh-2	ZC123.3	zfh-2 is a homeobox gene of the ZF (zinc finger class); it Concise description: zfh-2 is a homeobox gene of the ZF (zinc finger class); it encodes three homeodomains and encodes at last 15 zinc fingers; the ZF class is subdivided into several families; zfh-2 belongs to the Zfhx family and is orthologous to Drosophila zfh-2, and the three paralogous human genes ZFHX2, ZFHX3, and ZFHX4 (zinc finger…	Zinc Finger and Homeobox
I	833234	833235	dd17e8e9-3533-4c48-ad28-3628882ba4e8	1077	376	+	TCCGTGAGCATTAGCGGCGCCGACCCCAAAGAAGTAAGACGCTAACCTGGTGTAAAACCCACTTTGTGCTAAAGCTGTTCAAGAAGTTTTGTTTAATCCTTGATTAATCACCCATCTTCTTAATGCCTCTCTATAACATGTGCAACAAAACCCCTAATAGTTTCTCTATGTTTACATTTTGCTGTCACTTCAGGACCTATTCCGTTTTCCCCTCTCTGCCAAAAAACCAACTCCATCCCGATTGAGCTTACTCCATCCCTAAGGCTAATCAATAATATTCAAACCATCCCACTTTCGACCCATTCTCCCGTCGCCATCCCTCCCCGTTACATGATCCAATAATCGCTCATCTGCTTTTAATTTACCCATCGCCTAT	Site131	8	WBGene00022518	zfh-2	ZC123.3	zfh-2 is a homeobox gene of the ZF (zinc finger class); it Concise description: zfh-2 is a homeobox gene of the ZF (zinc finger class); it encodes three homeodomains and encodes at last 15 zinc fingers; the ZF class is subdivided into several families; zfh-2 belongs to the Zfhx family and is orthologous to Drosophila zfh-2, and the three paralogous human genes ZFHX2, ZFHX3, and ZFHX4 (zinc finger…	Zinc Finger and Homeobox
I	833262	833263	a7fbe5cf-1a1e-4745-ab20-48cd7288a0c6	2253	230	+	AAGTGATAAGACGCTAACCTTGGTCGATAAACCCACTCTGTGCAAAAGCTGGTTAAGATTAATCTTTGCTTCACCGAGTATTAATTCCATCTTTGCGCACCATTACTCTTCTGCGACGCCAACAAAACCCCTAATGGTTTTTTCCAACCGTTTATTACTCTGCTGCTACTTCAAGACCAATCACCATCGTTTACCTTTGCCACTAAATTCAACTCACTATCCCTGATAGA	Site131	8	WBGene00022518	zfh-2	ZC123.3	zfh-2 is a homeobox gene of the ZF (zinc finger class); it Concise description: zfh-2 is a homeobox gene of the ZF (zinc finger class); it encodes three homeodomains and encodes at last 15 zinc fingers; the ZF class is subdivided into several families; zfh-2 belongs to the Zfhx family and is orthologous to Drosophila zfh-2, and the three paralogous human genes ZFHX2, ZFHX3, and ZFHX4 (zinc finger…	Zinc Finger and Homeobox
I	1156807	1156808	ee676dc2-9a39-43e2-b0a8-81b5f682cc85	236	199	+	GTGCCGCTTTAAACCAGCAATGGAACACCAGGAGATGGCATTTGGCCGGTTCAAGTTCTGACTTTGATTACTGAAGAACGTTGAGAGCTATGGTAAGGCTGTTGTTGACTTCAAACTGAAAGCTTAACGTTAACGCTAATCGAAGCTAAGAAGAACATTCACTGTTGCCATGGAAGAATTAACTTATATTGTTTCTTGC	Site19	5	WBGene00004429	rpl-17	Y48G8AL.8	rpl-17 encodes a large ribosomal subunit L17 protein; by homology, Concise description: rpl-17 encodes a large ribosomal subunit L17 protein; by homology, RPL-17 is predicted to function in protein biosynthesis; in C. elegans, RPL-17 activity is required for embryonic and germline development, as well as normal postembryonic	Ribosomal Protein, Large subunit
I	1156824	1156825	2e94a3af-faf7-40cf-a4cc-183a6864aa22	254	189	+	CAATGGAACACACTTCCGGGGAGATGGCCGCCGTAGATACCTTAGAGTCCATTGTTCCTTTGATCTAAAGATCAAAGAGTTAACGTGATAAGGGGCATGATGTTGACCACCTTATATAGTAGTCAACGTTTATGCAATCAAGCATACAGAAGAACAACGCTGTCCTCGGAAGAAAACCATCCTATTTAC	Site19	5	WBGene00004429	rpl-17	Y48G8AL.8	rpl-17 encodes a large ribosomal subunit L17 protein; by homology, Concise description: rpl-17 encodes a large ribosomal subunit L17 protein; by homology, RPL-17 is predicted to function in protein biosynthesis; in C. elegans, RPL-17 activity is required for embryonic and germline development, as well as normal postembryonic	Ribosomal Protein, Large subunit
I	1156851	1156852	e7d2bb19-e47e-4bad-9205-b038e1a73e0b	256	140	+	CCAGTCAAGTACATAGTTTTCTGACTTTACTTTAGTTAATGTGGGTATGGGCTGTTCGTAGTCTCAAACTGAGTCTACTCTAACGTTTATGTGCTGTAGGTACAGAATATAGCCGCCCAGGTAGAATCAACCCATTACCG	Site19	5	WBGene00004429	rpl-17	Y48G8AL.8	rpl-17 encodes a large ribosomal subunit L17 protein; by homology, Concise description: rpl-17 encodes a large ribosomal subunit L17 protein; by homology, RPL-17 is predicted to function in protein biosynthesis; in C. elegans, RPL-17 activity is required for embryonic and germline development, as well as normal postembryonic	Ribosomal Protein, Large subunit
I	1156853	1156854	bfc2853a-9d29-4206-8085-568fb6df23bf	254	161	+	AGTCAAGTCCGCTGACCTTGAAGGTTCTGAAGACATAAGCAACGCCGAGTGGACGGCAAGCAGGGCATTGATGTTTCCGCATTGAGCACTCGTCAACGCGCTATCGGGGACACACTCGCAGAAGAACATTCGCCTCCGGAAGAAAACCCGTTCACCCGCTC	Site19	5	WBGene00004429	rpl-17	Y48G8AL.8	rpl-17 encodes a large ribosomal subunit L17 protein; by homology, Concise description: rpl-17 encodes a large ribosomal subunit L17 protein; by homology, RPL-17 is predicted to function in protein biosynthesis; in C. elegans, RPL-17 activity is required for embryonic and germline development, as well as normal postembryonic	Ribosomal Protein, Large subunit
I	1156863	1156864	7e897b8e-657a-43a7-a3fc-fc7e76356e14	313	177	+	GCTGACTTCCACTGAGCTTCTGCAGAACCGAGAGTAGCTAACGCCATCGAGTAAGGCTTGGTACGCTGACCTTATATCGAGTGGTTTACAACGCTCAACGCGCTCGTTCCGAGCTCGCAGAAGAACATCTCTCGTGCCTTCGGGAAGAAAATTAACCTAACATGTACCTATCCCTCA	Site19	5	WBGene00004429	rpl-17	Y48G8AL.8	rpl-17 encodes a large ribosomal subunit L17 protein; by homology, Concise description: rpl-17 encodes a large ribosomal subunit L17 protein; by homology, RPL-17 is predicted to function in protein biosynthesis; in C. elegans, RPL-17 activity is required for embryonic and germline development, as well as normal postembryonic	Ribosomal Protein, Large subunit
I	1839259	1839260	eafe47ab-8da6-490c-9adc-4ef57cdd2913	877	1001	+	CGTCGGAGGTCGGCGATCAGAAAGGCGGAAGTGGATCCCACAATACCGAAAATGTTCCTTAATTACATCGTCACCAGCGTGGTGCCTCTCCACCAGATATGATCAGGTTGGTGGTAATGACATAAGGAACCGGCTGGAAGAATCGAAGGTCAATCCATCGAACGACTCAACCGTTTCCCGTGGATCACCATTTTGTTTATTCTATAACCTGAACAAGAATACAGCCGAGGAAGATTTCTGCTTCGTTACTCTCTATAGGAGCTATATTTTACCTATGAATATGACGGTTCCCACCGATCCGATTTATGCCTATAAGGTCATTTTCTGGCGGCTTGTGACTTGATCCGGATGCCGATGAGATTATTCATCAACATTTACGTGCGTGTGGATACAGGAATT…	Site42	6	WBGene00001196	egl-30	M01D7.7	egl-30 encodes an ortholog of the heterotrimeric G protein Concise description: egl-30 encodes an ortholog of the heterotrimeric G protein alpha subunit Gq (Gq/G11 class) that affects viability, locomotion, egg laying, synaptic transmission, and pharyngeal pumping; it genetically interacts with the goa-1 pathway, and is probably expressed ubiquitously, with highest expression in	EGg Laying defective
I	1839277	1839278	3a43baed-5131-44bc-adc3-8f5b92e8fee6	864	409	+	AGAAAGGCGGAAGTCTGTTTCGAAAATGTCTTTCCTCAATCATCGTTCCTGGTGGTGCTTTTCGAGTATGATTAGGTGTTGGTCGGGTGATAACGAGAACCGAATCGGAAGAATCGAAGCTTGTTCCATCGACAACCTTGGTTCACATTCATTGGAAGCCTCCCGGAAGAACGAGAAAGTCTGTTCTGAGATACTGACTCTTGCATTTTCGTAGTATTACCCTATGGCTACTGTACGGTCTCCCTCGATGCGATTACAACCCATCGGGATCAACTTAAAATATGATACAATCGACTCGGTATTCAAGACCCGCTGTCAGAACTATTCATTACATGCGTGGCAGTATAGAGGTTACAGAATTACACTAAAGAATCTGTTTCGCCGCCGTTTGAGACACAA…	Site42	6	WBGene00001196	egl-30	M01D7.7	egl-30 encodes an ortholog of the heterotrimeric G protein Concise description: egl-30 encodes an ortholog of the heterotrimeric G protein alpha subunit Gq (Gq/G11 class) that affects viability, locomotion, egg laying, synaptic transmission, and pharyngeal pumping; it genetically interacts with the goa-1 pathway, and is probably expressed ubiquitously, with highest expression in	EGg Laying defective
I	1839286	1839287	9a9780ac-d858-4ddc-a07d-37568e3e2ba0	799	1104	+	GAAGTGGATCACAATTTCGAAATGTCTTTCCTCAATACATGCTCCTTGGCTGGCGTTACCATGAGTATCGATATCAGGTGTTGGTCGAGTGTTACGAGACTGGCTGGAAGAATAAGCTTGTTCCGAACGACTCACGCGTCTCTCCATTGGTTTCACCATTTTGTCATTTATTTCCGAACAAGAAGTTCTGCTAGATACTGTACTCGTTACAACTGAACATTTCCTGGCTATGACGGACCCACCGTGAACCATGATCATCATCCGAGTTTATTTCTTAGCTGTTTGTTGACAATTCGGACCGCGTACGAGATTATTCATACTCTACACATTCTTACGTTGCGTGTAGGATTACGGAATCCTGGTACGTGTTCGCCATCAAGGACCTGTCTCTGCTATACT…	Site42	6	WBGene00001196	egl-30	M01D7.7	egl-30 encodes an ortholog of the heterotrimeric G protein Concise description: egl-30 encodes an ortholog of the heterotrimeric G protein alpha subunit Gq (Gq/G11 class) that affects viability, locomotion, egg laying, synaptic transmission, and pharyngeal pumping; it genetically interacts with the goa-1 pathway, and is probably expressed ubiquitously, with highest expression in	EGg Laying defective
I	1839286	1839287	4619ecda-8c6d-4098-ac20-7e9e7ef39492	898	399	+	GAAGTGGATTTCCTTCAATACCACCACCGAGCCGTTCTAATATGTTTCAGCTGTGCACATGAGTATGATAAGGTGTTGAGGATTGACAACGAGTAAATAAGTGGAATAAGCACTGTTCGAACGAACATTACCGACCTACTGGTACCATTCTACATGGTCTATCTATTCCGACTGATCTGTTCCGAAGATTTCACTGTACTTATATTCTGCAGTACCCCTGGCGATCCCTCGATCTGGCTATGCCGCAAGTTATCTTAGCTGTTTAATGACATCTCGAATCCGGATGCCGATGGAGATTATTTTACTTCAACATCTGCGTGTGTATAGAACACGGAAACAGTCATCCGTTGTCTAAGGACACCAATTTGTTAATTTGAAAGTCAACTAAGCATCGATACT	Site42	6	WBGene00001196	egl-30	M01D7.7	egl-30 encodes an ortholog of the heterotrimeric G protein Concise description: egl-30 encodes an ortholog of the heterotrimeric G protein alpha subunit Gq (Gq/G11 class) that affects viability, locomotion, egg laying, synaptic transmission, and pharyngeal pumping; it genetically interacts with the goa-1 pathway, and is probably expressed ubiquitously, with highest expression in	EGg Laying defective
I	1839286	1839287	06ff6fbf-173b-4c02-8cc0-6f9905b47115	787	327	+	GAAGTGGACTTAAGTTTCGAAATGTTCCTCAATTCGTTCCTGGTGGCGCGCTTCACCGAGTATGGCCGGTTGGTCGATAGCATCAAGACTGGCTGGTAGAATGGTCAATCTCCGAAACGACATCACGTCTCCATTGACCACCATTCATGGTCATTTGTTCCTTGAACAGGAAGGATACTAATGAGGAACTACAATACTTCGTTTCGGTAACATCTCCAAAATTGACGGACCCACACCGATTCGATCGTCGCCTATGATTTTATTCTTAAAATGTCAATCGACTTGAATACCTGACGTGGCAAGATAACTTACTCAACCACGCGACTG	Site42	6	WBGene00001196	egl-30	M01D7.7	egl-30 encodes an ortholog of the heterotrimeric G protein Concise description: egl-30 encodes an ortholog of the heterotrimeric G protein alpha subunit Gq (Gq/G11 class) that affects viability, locomotion, egg laying, synaptic transmission, and pharyngeal pumping; it genetically interacts with the goa-1 pathway, and is probably expressed ubiquitously, with highest expression in	EGg Laying defective
I	1839308	1839309	ca7837ad-cb1d-4ab6-8ef6-90c12d62a29a	886	326	+	AATGTCACCTTCAAACCGTTCCGGCTGGCGTTCCGAGTCGATTCAGGTGCTGGTGGGTGCTGACAACGGGTATATGGCTGGAAGAATTAAAGCGGACCACTGTTCCTTGAAACGAACATTACCGTACCTCATCGATTTCTCCAACTTCATTTGGTCATTTATTCTCCTGAACGGAAGGTTCTGTTTGAGGAAGATTCATTGACTTCGGTATTACCCTGGCTGATGACCCACGAAGGCTCTGACAACCGCACAAGTAAACACTAAATCTGTTTAAATGACTTGGGAAATCCAGACGCGATCAGATTATTCTACTTATTTACGTGTTG	Site42	6	WBGene00001196	egl-30	M01D7.7	egl-30 encodes an ortholog of the heterotrimeric G protein Concise description: egl-30 encodes an ortholog of the heterotrimeric G protein alpha subunit Gq (Gq/G11 class) that affects viability, locomotion, egg laying, synaptic transmission, and pharyngeal pumping; it genetically interacts with the goa-1 pathway, and is probably expressed ubiquitously, with highest expression in	EGg Laying defective
I	2128702	2128703	0a67912f-20ef-4db4-a06a-93f06054377e	100	283	+	TGGAAGCTCATCGTAAATCCAACATTTTGACGCTGGAGCTACTAGAGATGTACACCTCTGGAAAAGAGCTATCGGCGTTGCTACCCATTTGGAACCCATCTCCAGCTTATGCTTGTCAGTTTATACAGCTTTGAGATATAATGACTTTGCTCATCATCTCGAGCTCAACGAAAATCGAACAGCCGAAACGGAGTGAACTAGTTTCCCACCAACCAACTGATACACCTGTTGGCCACAATAAGGACCGATCTGGCGATACCAGAATAGCTGAACACTGACATTA	Site44	5	WBGene00021355	Y37E3.17	Y37E3.17	Y37E3.17 encodes a putative mitochondrial dimethylglycine dehydrogenase Concise description: Y37E3.17 encodes a putative mitochondrial dimethylglycine dehydrogenase orthologous to human DMGDH; studies indicate that the elegans dehydrogenase is a phosphorylcholine (PCho)-modified protein; P-Cho modification of proteins seems to play a developmental role in nematodes, as interfering with it, causes…	not known
I	2128740	2128741	21425c70-71e1-4f6a-a99d-126eddfbab69	143	653	+	TCAAAGATGTACACCTTGAAGGCTCCTAGCGTACCATCTGGAACATCACTCCACTCACCGGTCGCCGTCAGCCAGTTTACACCAGCTCAAGATATGTTGACATGGCACAACCATCGAGCACACTACGAAATTGAAGCGTCGAAACAGGAAGTGAACTGTTCCATCTGGACTCATACACGTCGTCCACGATCAGACTTGTCGAATCAGGAAATACGACTCTGACTATCGGGAAGGATGACGCAAACGACGCTCCTTCCAGGAACCATCTGGTAAGAAATTTGCTCCAGACGAAGTTCACTTCGAATCAGGAGCTTTCACAACAACCGATGGAACAACTTGCTCTAGGCTCTATCAGGCTTCGTTGTTGGAGCTCAAAATTGGTGGAGCTCAAGAAGTATG…	Site44	5	WBGene00021355	Y37E3.17	Y37E3.17	Y37E3.17 encodes a putative mitochondrial dimethylglycine dehydrogenase Concise description: Y37E3.17 encodes a putative mitochondrial dimethylglycine dehydrogenase orthologous to human DMGDH; studies indicate that the elegans dehydrogenase is a phosphorylcholine (PCho)-modified protein; P-Cho modification of proteins seems to play a developmental role in nematodes, as interfering with it, causes…	not known
I	2128744	2128745	7403d456-e0c0-45c8-bfcd-8fb86047bcb9	169	264	+	AGATGTACTACCTACTGGAAAGAGCAACCTAGCGCTGCACTTCATCCTGAACTTACTTCCACACCCTGGTTCAACCGGCCCGGTGGTTTCATCCGATACAGATTTAAGCGCGATTTTGGCATTCATCGACACACTCAAAGCTGGTGGCCGAAACAAGGAGGAGTGAACTGACCACTTATTGGACTTCCATCCTCGATAATACAAATGAGACTATGATGGCTGAATCTCGGAGAAAAATATGCAAATTACCTTGATTACTACTAT	Site44	5	WBGene00021355	Y37E3.17	Y37E3.17	Y37E3.17 encodes a putative mitochondrial dimethylglycine dehydrogenase Concise description: Y37E3.17 encodes a putative mitochondrial dimethylglycine dehydrogenase orthologous to human DMGDH; studies indicate that the elegans dehydrogenase is a phosphorylcholine (PCho)-modified protein; P-Cho modification of proteins seems to play a developmental role in nematodes, as interfering with it, causes…	not known
I	2128745	2128746	ac7cf7c7-b71a-40b9-8ea8-f019b478c2d9	159	761	+	GATGTACTCCACAAAGAAGAGCATCAGGCGGAGAACTCGGCGCGTACACAGCGTATTCTCAACCGGGGAACATTCCATCATTACCAATAGCTCTTGCGTGTTAGCCAGTTACTCCAGCTTCAGATATGTTGCTGATTCGGCATTCCTCGAGCTCGAAATTGGAAGCGAAACAGAGGAACTACTGACTTCCTCAACCAACTGGAACACTTGGCTGGCCACATGTGAGAACTGACTTGAATTGAATTCAGAAATATGTGAACATTGATTACTATAAGGAAGATGTAAATGATGACCTCTTTCCCAGAACCAAGTTCGTAGAATCGCTCCGGTACCGAATTCACATTGCTCCAAGAAGCTACCTCAACGAATGGAACTATTCAAGTCATCAAGGCTTCTAGG…	Site44	5	WBGene00021355	Y37E3.17	Y37E3.17	Y37E3.17 encodes a putative mitochondrial dimethylglycine dehydrogenase Concise description: Y37E3.17 encodes a putative mitochondrial dimethylglycine dehydrogenase orthologous to human DMGDH; studies indicate that the elegans dehydrogenase is a phosphorylcholine (PCho)-modified protein; P-Cho modification of proteins seems to play a developmental role in nematodes, as interfering with it, causes…	not known
I	2128751	2128752	7c8b744a-5df0-43fe-90ae-631681a30de2	160	237	+	CTCCTCTTGGAAGAGCACTCCGAATTGCATCACCATTCTGGACTTTCCACTACCTTGGTTATCAGCGGTTTACCCGTTCAAGATATGCTGACTCTGGCACATTACCACCATGGGACCACACTACCGAAATTGAAGCCGAAACAAGAGTGAACTGATTCCTTTACTCAACTGGAACCGGTCGCACCGGCAAGGAGACTCGTGACTGGCTGATCAAGAAATATGTGACTTGGTTACTAT	Site44	5	WBGene00021355	Y37E3.17	Y37E3.17	Y37E3.17 encodes a putative mitochondrial dimethylglycine dehydrogenase Concise description: Y37E3.17 encodes a putative mitochondrial dimethylglycine dehydrogenase orthologous to human DMGDH; studies indicate that the elegans dehydrogenase is a phosphorylcholine (PCho)-modified protein; P-Cho modification of proteins seems to play a developmental role in nematodes, as interfering with it, causes…	not known
I	2262703	2262704	96783fe2-69af-401d-8646-e2f20efebfc4	3060	651	-	CAGGGCGAAGCAGGAATAAGGGAATGACTTGAATTGGTGGTGTCGTTTGCTTTTAGCGTGTAGTTGTAATACGGCAGAACAAGGTAGCGTAAGAAGTGTTGGAAGATCAGACGTATTGCCGATCGGTGAACAGGTTTCTCGAGTCTTCAAATTCAAGTCCACTTCATTATCTGCAAGCTGGCGGTTATTTCTCAATGAGCCACTTGGTTGTTTGAGCAATCAAGTAGTCGTTTTGCTCTTCCTCGTTTCTCGAACTGCAACTTTGCTTCAGTCGTTTAAACCATCCACACTTCACCCTTCCTTCGGCACATGTTCTCTTTCTGTGAGGGGCCTGGACCTGGTCATTAAGAATTCCGAAAAGTTGGTGCCAGTGAATTCCATATTGTCCCAACCATATTT…	Site45	7	WBGene00000020	abt-2	F12B6.1	abt-2 encodes a predicted ATP-binding cassette (ABC) transporter Concise description: abt-2 encodes a predicted ATP-binding cassette (ABC) transporter that is a member of the ABCA subfamily of transport proteins; ABT-2 is predicted to function as a transmembrane protein that couples energy to transport of various	ABC Transporter family
I	2262703	2262704	fc6ca356-df19-495b-8d69-e25b188dd628	3296	684	-	CAGGGCGAGCAGGAAGTTGTGGGAAATGATGACTTGAGATTGGTGGAGTTCGTTTGCTGCTTTTAGCGTGTAGTAGTTGTAGCGGCTGTAAACAAGGTGGCGTAAGTGTTGAGGAAGAACTAGATTGCCACGGTCGAGGAAGCCAGGTTTCTGCGAAGTCTGCTCAAATTTCAAGTCCTCCTCGTTAATTCTGTGCTGGTGGCGGTTATTCTCAGTAATGCGCTGTGTAGAATTAACAATACTTTGTAGTCGTATTAGCTCTTCCTCATTCTTGATCTTGCAACTTTTGCTTCAGTCATATAGACCATCCACACTTCACCTACTCGGCACATGATCTCTTTCTGCTTGAAGGGACAGGGACACAAATATTTCTAGAAGTGGACAGAAATTCCATATTGT…	Site45	7	WBGene00000020	abt-2	F12B6.1	abt-2 encodes a predicted ATP-binding cassette (ABC) transporter Concise description: abt-2 encodes a predicted ATP-binding cassette (ABC) transporter that is a member of the ABCA subfamily of transport proteins; ABT-2 is predicted to function as a transmembrane protein that couples energy to transport of various	ABC Transporter family
I	2262713	2262714	7b5369c9-e07d-47d0-835b-c6f691200ac7	146	624	-	AGGAATAAGGGAATGATGACTTGAAACAGGTGTTCGGTTTGCTTTAGCGTGTAGTTGATACGGCAGACAGGAGAGAGCGTAGTATGGAAAATCAAGACGTTTGCCGTCGGTAGATCGGGTTTCTCGAAAGTCTTCAAAATTTCAGAGTCCTCCTCCACTTCATTATTTCTGTGCTGGCATGTTATTCTCAATGACACCGGATGGTTTTGAGCGATCAATGTCGTTTTGCTCTTCCTCGTTTTCTCGAACTGCACAACTTTTGCTTCAGTCGTTTAAACCATCCACACTTCACCACCTTCGGCGCATGAATACTCTTTCTGTGGGCCGGGACACGAGAATATTCTGAATGGATTCGAATTCCAATTGTCCAAGCTGATATTTCTCAACGTTCTCGTCAAG…	Site45	7	WBGene00000020	abt-2	F12B6.1	abt-2 encodes a predicted ATP-binding cassette (ABC) transporter Concise description: abt-2 encodes a predicted ATP-binding cassette (ABC) transporter that is a member of the ABCA subfamily of transport proteins; ABT-2 is predicted to function as a transmembrane protein that couples energy to transport of various	ABC Transporter family
I	2262719	2262720	a50405ec-ea4b-4d1d-a27a-489d71cbdaf3	3037	628	-	AAGGGAATGTTGACTTGAAACAGGAGCCCATTGCTTTTAGCGTGTAATGATAGACGATTGAAGGAAGCGTGTAAAGTGTTGGAAATCAGACGTATTGCCGGCTGTAGCCAGGTTTCTCGAAAGTCTACAAATTTCAAGTCCTCCAGCTTCATTATTCTGTGCTGGCGTAATAATTCTCAATGAGCACTCCGGATGTTTTGAACAATCAGTTGTCGTTTTGCTCTTCCTCGTTTCTCAAACTGCACAACAACTTTTGCCGCTGTCGTTTAAACCATCCACACTTCGAGCCACCTTTCGGCACGGTTGATACTCTTTCTGTGGGGCCAGGGACACGTAATATTCTGAAGAGTTGGAGCCAGAAATTCATACGACCAAGACCGATATTTCTAGTGTTCTCGT…	Site45	7	WBGene00000020	abt-2	F12B6.1	abt-2 encodes a predicted ATP-binding cassette (ABC) transporter Concise description: abt-2 encodes a predicted ATP-binding cassette (ABC) transporter that is a member of the ABCA subfamily of transport proteins; ABT-2 is predicted to function as a transmembrane protein that couples energy to transport of various	ABC Transporter family
I	2262721	2262722	994f5c05-d6a1-44c6-8e2f-519bc65864dc	2959	623	-	GGGAATGATGACTTGAACAGGTTCGTTTGCTTTTAGCGTGGTTGATACGGCAGACAAGGAGAGCGTGTAGAAGTGTTGGAAATCAGACGTTTGCCATCGATGGAAATCGGGTTTCTCGAGTCTTCAAATTTCAAGTCCTCTACTTCATTATTCTGTGCTGGCATGTTATTCTCAAATGAGCACCGGATGGTTTGAGAGCTTAATCAAGAGTCGTTTTGCTCTTCGTTTCTCGACTGCACAACTTTTGCTTCAATCGTTTAAACCATCCACACTTCACCACACCTTCGGCACATATACTCTTTCTGTGGGCCAGGGACCCGCAAATATTCTGAAAAAATGGTGCAAATTCCATATTGTCCCAAGCTGATATTTCTCAACGTTCTCGTCAAGGCGATAGAA…	Site45	7	WBGene00000020	abt-2	F12B6.1	abt-2 encodes a predicted ATP-binding cassette (ABC) transporter Concise description: abt-2 encodes a predicted ATP-binding cassette (ABC) transporter that is a member of the ABCA subfamily of transport proteins; ABT-2 is predicted to function as a transmembrane protein that couples energy to transport of various	ABC Transporter family
I	2262732	2262733	48bcd8c2-04fa-44f9-9902-becf2acdd736	3165	637	-	CTTGAAACAGGAAAGGTTCGTTTGCTTTTAGCGTAGTTGATACGGCAGACAAGGAGAGCGTAAGTGTTGGAAGAGATCAAGTGGATTGCCATCGAGGAGATCGGGTTTTCTCGAAGTCTTCTTCAAAATTTCAAGTCCTCCACTTCATTATTCTGTGCTGGCATGTGATATTCTCAATGAGCACTGGATGTATGGTTTTGAGAGCAATCAAGTCGTTTTTTTGCTCTTCCTCGTTTCTCGAACTGCACAACTTTTGCTTCAGTCGTTAAACCATCCACACACTTCACCACCTTCGGCACATGATACTCTTTCTGTGGGGCCTGGGACACGAAAATATTCTGAAGAATAATGGACAGAAAATTCCATATTTGTCCAAGCTGATATTTTCAACGTTCTCGT…	Site45	7	WBGene00000020	abt-2	F12B6.1	abt-2 encodes a predicted ATP-binding cassette (ABC) transporter Concise description: abt-2 encodes a predicted ATP-binding cassette (ABC) transporter that is a member of the ABCA subfamily of transport proteins; ABT-2 is predicted to function as a transmembrane protein that couples energy to transport of various	ABC Transporter family
I	2262757	2262758	a63d979f-43f3-4334-8523-e1489b1f686f	3236	613	-	TTTTAGCGTGTAGTTGATACGGCAGAACAAGGTAGCGTAGAAGTGTTGGTGAGATCAGACGTTTGCAACAATGGAAGCAGGTTTCTAAAATCCGCTTTAACGAAATTTCAAGAGTCCTCCAGCTTCATATTATTCTTGAGCTGGCATGGTAATATTCTATTATGAGCACCTTGGTTGGTTTGATGTATTAATCAAGTCGTTTGCTCTTCCTCGTTTCTCAACTGCGCCAACTTTTACCGCCCAGTCGTTTAAACCATCACACACTTCACCACCTTAGCACACGTTACTCTTTCTGTGGGCCAGGATCGCAGAAATATTCTGAAAAAGTTGGTGCAGGAATTCTAATTTGTCCAAGCTAATATTTCTTATGTTCTTGTCCAAGCGAATATGTACTCCTCA…	Site45	7	WBGene00000020	abt-2	F12B6.1	abt-2 encodes a predicted ATP-binding cassette (ABC) transporter Concise description: abt-2 encodes a predicted ATP-binding cassette (ABC) transporter that is a member of the ABCA subfamily of transport proteins; ABT-2 is predicted to function as a transmembrane protein that couples energy to transport of various	ABC Transporter family
I	2875402	2875403	37dbddb0-f8f8-4d95-bb49-f4601b2d1ac2	90	242	-	CAACAATGTTTATGATGTTAACAAAAGTAATTAAACTTTGTGGCTTCTTCGGTGACTTGATGTTCAACTAATCCATTCCTTCAAATGAAGCGGTGTTGAAGGTAATGAAGCAGCTTGGAGAGTCCAACAAAACCTTCGACGGATAGAAAGCTTCGTCTTGTCTTAACGAATGCGATTCTTGCTTCCAGCCAAGAATCCTAAGGTTGCATGAGGAAGTTTTCGGCCTTAGTAGTCCTGAATAT	Site46	9	WBGene00004412	rpl-1	Y71F9AL.13	rpl-1 encodes a large ribosomal subunit L10a protein; by homology, Concise description: rpl-1 encodes a large ribosomal subunit L10a protein; by homology, RPL-1 is predicted to function in protein biosynthesis; in C. elegans, RPL-1 activity	Ribosomal Protein, Large subunit
I	2875427	2875428	ee7c195a-0790-4004-8ffe-4905030c7849	114	207	-	TAATTAATAGTCTCTAGTGCTTCCCAGTGAACTTGATGTTCAATAATCTCACATACCTTTTCCCAGCAAGAAGCGGAATAATATGTGTGGGAAAGTTAGGAAACTTAGCCTGGAGTAACTATAACCATACGAGCGACAGAGAGCAGAACCTCATCCCGTACCTAATAGAGAGCATAGGATCGGTACAAGGAAATTCCAGAGGTTAGC	Site46	9	WBGene00004412	rpl-1	Y71F9AL.13	rpl-1 encodes a large ribosomal subunit L10a protein; by homology, Concise description: rpl-1 encodes a large ribosomal subunit L10a protein; by homology, RPL-1 is predicted to function in protein biosynthesis; in C. elegans, RPL-1 activity	Ribosomal Protein, Large subunit
I	2875427	2875428	dec0a5d0-bd20-4722-a412-00f5d12b2445	97	286	-	TAATTAATAACTCTTGAGCTTCCATGTGAACTGAATGTTCAACAATCTCGTATCTGCCAGTTCTTCTTCCTCTAAAAGTCGAAGACGGTGAAGTTAATGATGTGAGTGGGAAAGTGGAACAGTAACCCCTAGGTAATCCTAAAACAAGTCATTAACGGAGTGGCTGAAACTCACAACCCGGAACTAACAGAACGCAGATCACCGACTACCACCCGAAAGCCCGAAGTATACAGAGGGTAATTCCTACATAGAGTCCTGACCAGATACGGAAATACCCAACTGAACC	Site46	9	WBGene00004412	rpl-1	Y71F9AL.13	rpl-1 encodes a large ribosomal subunit L10a protein; by homology, Concise description: rpl-1 encodes a large ribosomal subunit L10a protein; by homology, RPL-1 is predicted to function in protein biosynthesis; in C. elegans, RPL-1 activity	Ribosomal Protein, Large subunit
I	2875467	2875468	18f04937-7338-4bf8-82ee-b79dd3e8aea7	120	249	-	ATGTTCAACAATCCTCGCGTTCAGTTCTTAGAACGAGAACACAGGAAATGGGAAGTGGAACAGAACCTCTTCCTTGGGTAATCTTACGGAACCCATAACAGCAACAAATGTGCTAACTCCATCCCGTAAACTAACAGAATGCAAATCATCACTACTAAGAAATTCCTCCGTAATACAAAAGGAATTTCCCGCCTTGTTAATACCTAGACTGAATACACGGAAATCAATGTTCAAAATTCGAGCGGCGGC	Site46	9	WBGene00004412	rpl-1	Y71F9AL.13	rpl-1 encodes a large ribosomal subunit L10a protein; by homology, Concise description: rpl-1 encodes a large ribosomal subunit L10a protein; by homology, RPL-1 is predicted to function in protein biosynthesis; in C. elegans, RPL-1 activity	Ribosomal Protein, Large subunit
I	2875490	2875491	b73e53dc-1d2b-4fa3-921d-b562b75ac136	157	105	-	CCAGTTCTTCTTTGGGCGGAATGGAACAAGCTCCTAGGTCCAGCTGTCATACGAAACCTTCGTCTGACTTGATCTCACTCGCTTCGGTATTCTCCGGAATTCAGC	Site46	9	WBGene00004412	rpl-1	Y71F9AL.13	rpl-1 encodes a large ribosomal subunit L10a protein; by homology, Concise description: rpl-1 encodes a large ribosomal subunit L10a protein; by homology, RPL-1 is predicted to function in protein biosynthesis; in C. elegans, RPL-1 activity	Ribosomal Protein, Large subunit
I	2875494	2875495	45a777ba-69a0-4725-b128-326aa01f3775	168	178	-	TTCTTCTTCGAGAATAAAAGACGAGAGAAGAGTTATGAGTAGGAAGAATGTTATGTGTACTTACTGGTAAGTTCAGCGACCATATTGCGAAACGGTATTAGAACTTCATCTGAAGTCCTTAACGAATATGCAAACTGACCACTCAGCCATGAATTCCGTGGTGTAATTAACGAAAAAA	Site46	9	WBGene00004412	rpl-1	Y71F9AL.13	rpl-1 encodes a large ribosomal subunit L10a protein; by homology, Concise description: rpl-1 encodes a large ribosomal subunit L10a protein; by homology, RPL-1 is predicted to function in protein biosynthesis; in C. elegans, RPL-1 activity	Ribosomal Protein, Large subunit
I	2875494	2875495	2ba3a918-6f39-4827-bcbe-a86b3aa3354d	183	258	-	TTCTTCTTCAATGTAACAAAACTTTGAATTGAGATGTGGGTAAATATAAGACTAAACCTTGGAGTTCCCAAAAACTCAACAACGCCGAAGTGAGCAAGAAACCTTCTTCATCCCGAACTAACGAAGCGAGGATTCATCCAGCTTTGAGATTCGAAGGTAATAGTACGAGAGGAATTTCGCCTTGTTAATACCTGAACCAAATAAGGATCCTTCCCATACAGTGAGAGATTCGGTATAGTAGCCATCATAATTTCTCAT	Site46	9	WBGene00004412	rpl-1	Y71F9AL.13	rpl-1 encodes a large ribosomal subunit L10a protein; by homology, Concise description: rpl-1 encodes a large ribosomal subunit L10a protein; by homology, RPL-1 is predicted to function in protein biosynthesis; in C. elegans, RPL-1 activity	Ribosomal Protein, Large subunit
I	2875496	2875497	e2204a44-9337-4607-8069-4c674d06f614	178	183	-	CTTCTTCAGTCAAGTACCCCGAATTCAGTTGTGTGTGGGAAATGTTTTTAGGTACTATACCTGGTAATCATGACTACGACGACGTGTAGACAAGTATTTCATCCGTACCCATCAGAGCACAGATCACTAAAATTCCAAAGGGTTATTACAGAAGGGAATTTCAGCCTATAACCTGTACTGGAT	Site46	9	WBGene00004412	rpl-1	Y71F9AL.13	rpl-1 encodes a large ribosomal subunit L10a protein; by homology, Concise description: rpl-1 encodes a large ribosomal subunit L10a protein; by homology, RPL-1 is predicted to function in protein biosynthesis; in C. elegans, RPL-1 activity	Ribosomal Protein, Large subunit
I	2875496	2875497	9ce9516a-3444-4bf4-8497-97006c17bd38	149	178	-	CTTCTTCAAAATAAACGCAGTGAGAATAGTGAAGTGGGAAGAAAACAGTGCCTTGGTAACCAACGTAACCAACGTATAGAGCAGAACTTCATCCTGAACCAATTGACAAATGGATCGTCACTGCTTAGGAGATTCTAGCGGAATTTCCTGCCTTGTTGTTACCCGTCAATGGAAATAC	Site46	9	WBGene00004412	rpl-1	Y71F9AL.13	rpl-1 encodes a large ribosomal subunit L10a protein; by homology, Concise description: rpl-1 encodes a large ribosomal subunit L10a protein; by homology, RPL-1 is predicted to function in protein biosynthesis; in C. elegans, RPL-1 activity	Ribosomal Protein, Large subunit
I	3267546	3267547	bf3f4be5-3af0-4e0e-8f5c-faa247a13ff6	92	611	+	TGAATGCCGCCGAATCATCTGTGGCTTTGCTTCGCCTTTGTTACAAGGGTCAAATTCAACCCAGAAGATTGTTACCACCATGATATATAGGCTATCCAATCGATGATTTCTTGACCCAAGTTGAACATTGCTGGCGTGTCAGAATTGACGGATATCGAACGCTACTTCCCCAGAGCTGGAAAAGACTCCAAGATCAAGCTAACGTTTGGATTATCAAGGCCGTCGACAGAACTGGCATCAACCTGATCGATTCCAGAGGAGGTAAGGGTCATTGAGATGAAAGATTCAATGGAACTGACTTGATTGATCCATCAAGTTTATGACATCCAGGTGCTTTGCCTACAACGGCTTAACTCGACTACCACAAAATCGTGTTTCATCACCAATTTCAGTTTGTAC…	Site47	8	WBGene00020915	nol-58	W01B11.3	none available	NucleOLar protein
I	3267593	3267594	c32a1f17-5e7d-4c7d-ad59-6d5ecbcbaddd	457	836	+	GTCAAATTTCAACCCAGAAAAGATTGTCACCGATTGTGCAGGCGTTCCTTTGCGACGAATCTTTAATCCCAAGGGTCGACACTATGCTTACGCCGGCCAAGAAACAGCACGGAACGGCATTCCCAGGGAGCCTGAAAAGGTATCCTCCGGGATCTGTCATCGCTTGAGATTATCGAGGCCTTGGCGCGACAGATTGTTATTAACACCGATATGTTCGATTACCAGAGTTGGAGAGGAAAGGTTAAAGATGTAAGATTCAATGGGAACTGTACTCTCTGATATTGATTTTATACAAGTTTACAATTGTGACAAGGTCATTGGTCTTGCCTCTTCGTTGTTCTTAACATTTCGAACCTTAAAATTTGCAAGTGCTCTTTGCACCAAATTTCGCAGTTTCTG…	Site47	8	WBGene00020915	nol-58	W01B11.3	none available	NucleOLar protein
I	3267593	3267594	232939ec-70c6-4b07-95f6-2fe69375e8d7	450	842	+	GTCAAATTCAACCCAGAAAGATTTCCACCGATCGCTGCAGGCTGCTTCTGTCGAATGACTTTAGTCGGGTGAACAACTATGTTATGCAAGAATGGTTCAGAACTTCCCCAAGGAGTCCAAGAGGCAGACTATTCCAAGACATCTTGGTCTAACTTGCTAAGATTAACCAAGGCCGTCAGAACTGTCAACCAAGGCTCTGTATGATTTCCAAGAAGTTGGAGGTTTGATGTAAGATTCAATGGGACTAAGTTACTCTTCTGACTGAAGCTTTATCATCAAGGTTTTGCCGGTAAGCTCCGTACCGTGCCATCAACTACGAATTACCACCAAAATTTGCTGGTAATACCGTTCCACCGAATTTCATAGAGTTCTCAAGAGCTTGACAGAAGCCCGTACATT…	Site47	8	WBGene00020915	nol-58	W01B11.3	none available	NucleOLar protein
I	3267593	3267594	7134f801-5896-4fce-96dd-0102f816a89f	435	630	+	GTCAAATTCAACCCAGAAGATCGTATTTCCACCACATGGTTTTCGTGCGTGTTGTTCTTATTGCTCGACGATTTGACCCAAGTATAACGTTATGTGTCAGAATGGTACGGATGGCATTTCCCAGAGCATGAAAAGACTATCCAAGATCATTTCAAGCTCATTATGCTAAGGATTATCAAGGCCTGTGGCGCGGCAGGATTGTTACTTTAACACCGATTTCCGTCTCGGCTACAACACCCAGAGGAGTTGGAGGAAGGGTCAAAGAGACAATGCCTGGGATTTGTTGAACTGACATCACCATTGATCAATTAATAATTTATTTAAGGTTCTGTGGGACCATCAGGTCACGAAATATTTGCCTACCGCGGCTTCAACTCTCGACTACCTCAAAATTTTCGC…	Site47	8	WBGene00020915	nol-58	W01B11.3	none available	NucleOLar protein
I	3267607	3267608	cda5fbe9-07b3-4092-84ec-ec646b92e3c0	440	787	+	AGAAAAGATTGACACCATGATATGAGGCTGTTTCTGCTTGATGATTTTATTGATAAGGGACTCGATAAACTATTGTATCGTGCGATAAAGAAAACTGGTACAGGATGGCTACTTCCAGAAAATGGGAAAGACTATCCTGATCATTCAAGCTACTCATGCTAAGATTATCAAGGGCCATTGGCCGTGTGTCAGATTGTTATCCTTGATCTATTGTTATCGATTTTCCAGAGGAGTAAAGGTTAAAGGATGCTGATTTAATGGGAACTAGCATCACTGATTAAGTTCAACTTTACACGAAGCTTTCGCAGCAAGGTTACTCGAAATTTTGCCTCTTCGTGCTTAACTCTTTCGACTCTCCTAAAATCGTTACGGTTATCCATCGTACACAATCACAGTTCC…	Site47	8	WBGene00020915	nol-58	W01B11.3	none available	NucleOLar protein
I	3267607	3267608	d0059ec9-d917-4c1a-abf5-9443f109994b	465	630	+	AGAAAAGATCGACCTGTATGAGCTGTCTTGCTCGATCTTGAAGGCTCCAGGGTATAGCTGAACTATTATGTTATGTCAGATTGGTACGGATGGCATCACTTCCAGAGAAATTTGGAAAAGACTATATCCAGTAGATTTTACAAGCTTACTTATGCTAAGATTATGTCATTAATGACAGAACTGCATTTCATTCAGTTTTAGGCATCGAACTTCCAGTTAGAGGAGGAGGGTAAGAGGAATGTTGAGATTTATAGGAACTGACATTTGATTATTGGATTTTATCAAGGGTTTTGTGACCAGGGTTCAAATTTACCACCGCCCTCGTGTTCAACTCTCGACACAAAATCTTCGCCAAATTTCACAGTTTTAGAGAGCTCAACGGAGCCCGTCATTTGGGAT…	Site47	8	WBGene00020915	nol-58	W01B11.3	none available	NucleOLar protein
I	3267617	3267618	f3fa289d-be81-472c-bc93-16f24b5f0944	65	624	+	GACACCATGATCGTGTGCAGGCTATTTTGCTCGATGATCGACGGGGTTATGACAACGTTGCGTGTCAGGAATGAATACGGACTGGCATTCCCAGAGCTCTGGTAGACTATTTCGAGACTCATTTGGACATTATGCTAAGATCAAGGCCGTTGCGACAGAACTCTGTTAACACATGATTCTCTACTACTGTTAACTGACTTCAGAAGAAGATTGGAAGAAGAAGGTTAAGTCAAGATCGCTAGGTATCTCTAGTAACTGATTCTTGGTTGCTGACAAGGGTTGGCTGCTCTAACCTCTGTATTCTAAATCATTGCAAATCTATCCGACCCAAGAACCTTCATGCTGAGGAGAATTCTATCGGAATCCGTCATTCGAAGCTCCAACCTCTATAATCAAGGC…	Site47	8	WBGene00020915	nol-58	W01B11.3	none available	NucleOLar protein
I	3267638	3267639	23ffc52b-41a9-4191-b517-d87688363571	503	638	+	GTTTCTTTTGCATGATGATAGTTTTGACGTGGGAGTCAAACTTTATCATCTGCGCCAAACCGGAGGGCAGCACGGTGCGGTGCATTTCCCCTGGAGCCAGCAGACTATCCCAGATCTAGGTCTTATCGCTAAGATTATCAAGGCCATTGGCATGACAGAACTGCATCCGATTTGTTTATCGATTCTCCACAGAGGAGTTGGAGGAAGGGTTCAAAGAGGATGAAACCTGCTGAGATTTTGCAAGGAACTGACATTTTAGTTGATATTGATTTTTAACATCAAGGTTTTGTTGACCAGGTTCAACGAAAATCCTGCCTCTCCGCGCTCCTTAACCACGACACCCTAAAATCAGCAAAACCTCTATTCCCGGCTCTCAAAGCTTTCAATGGAAAATCCGCA…	Site47	8	WBGene00020915	nol-58	W01B11.3	none available	NucleOLar protein
I	3267688	3267689	e3e9e729-3029-40df-bd07-3c8a4fa77c98	500	560	+	TGTCAGAGAATGGACAGTGCTACACCCAGAGCCATAGTGGACTAACACACAGATTTGGTTATGCTAAGATTAAGGCCATTGCTACGTGTCGGATTGTTCATTTGGCCAACTGAATGCTGTTACCGGAGTTGGAGAGGAAGGTAAGGATGTAGTTTTAAACCGGATTGACACTGACTTGATTTATCTCTTACAAGGGTTTTGGCGATACCAGGTCATCGAGCTTCTCTGCCTCGTGCTTACTCTCTTGACTACCTTGGCTGCTGTAATTTTCGCTCCAGCTTTAGACCTTTAGAAGAATCGTCGGAGCCCGACATTACCACAATAGTACCACTTTGTTGGCAGGCTCCGTCCTCGATGATCAAATACTTGAAATGAGGCTACGTGCTCAAGACGAAGAAG…	Site48	11	WBGene00020915	nol-58	W01B11.3	none available	NucleOLar protein
I	3267699	3267700	fa554ff4-186c-460a-a9ed-f59c43c7721d	573	662	+	GGTACGGATGCTACCCCAGAGCTTAGAAAGAACTATTCCTGAGATCATTCTCTTCGAGCTTATCGCTAAGATTATTCAAGGCCATTGCATGCGACAGAACTGTCATCATCCACTGATTTGGTTTACTTTGATTACCACGAGAGTTAGCAGCGGCCTTGGAGGTCCCAAGATTCTCAATGGGACTAGTTACTTTCTTGGATATTGATCTCATTTATCAAGGGCTTTAAGCAAGTTCCAGTCATCGAAGCTCTCGTCTACCGTTGCCCATTCTGTAACCTTAAAATCGTTGTAAAATTCCATTGCCACCAAATTTCACAGTTTTCTTAGAGCTCAATGGAGCCCGTTTATCACGCTGGATTTCTAATTTCGTTGGCCAAGGCACCAGCCACAACCGATGAT…	Site48	11	WBGene00020915	nol-58	W01B11.3	none available	NucleOLar protein
I	3267703	3267704	7fc93f73-68d1-4e55-9291-afd836b4fce4	560	606	+	CGGATGGCATTTCCCCAGAGCTGACTATCCAGATTCTACTCGGGTCATCAAGATTAACGGGGCCGTAATCACGCGAGAACTGTTAACACCGATCGTCTCGATTCTTCCAGAGGTAAGAGGAGGTCATCGAGAGGATGCTAAGAGAGATCATAGGAACAGCACTTCTGGGACATTGATTCATGCTTACATTAGGTTTTTTGTGACCAGGTCATTGGGACATCCCTTCGTATCTAACATTGGCATTACCCACAAAATTCTATCGTAAGCTGCTTATTCCAAATTTACAGAGTTTTCGGAGAGAGAGCTTATATGTCGAAGAAGCACCATTTACCGGATTTCGCTATCGGCCAGGCACCTGGCTTGGACGAATTGCTTTTTTGGAGCTAGAAGGCTTTTCCA…	Site48	11	WBGene00020915	nol-58	W01B11.3	none available	NucleOLar protein
I	3267703	3267704	607a37a4-5999-4d61-862a-2b7329f1689b	545	514	+	CGGATGGCATTTCCCAGAGCTTGAATTGGATTATCCAAGTTACTTCAAGCTCGTATCGCTAAGAACACTGGGGCCATTGGCATGCGACAGAACTGTTACATCAACCAAGGCTCCGTTTACAGGTTTCCCTGAAGCAATCCTGGAGGATGTAAGACTTATCTGTTTTGTTGACCTTTTATCTGGCATTGTCTCCAATACATGTAATCCTTGCCTACCATATCCATTTCATTTTCCCTTAAAACACTATGTTGCTCTTATACCGAATTTCACAGTTTTCATGGAGAGGCTTATCGGAGCCTATTCATTCACATGTGGATCTCTATTTTATGGCCGGGCACATAGCCTTGTACGAACATTAATACTTGGCTGGAGGCTTTCACGTTTTCCGCACTGACGAAG…	Site48	11	WBGene00020915	nol-58	W01B11.3	none available	NucleOLar protein
I	3267705	3267706	5f5f32b3-af0f-4c94-8c26-735884b12505	563	518	+	GATGGCATTTCCCAAGAGCTCAAGAAAAGACTATTCAGTTTTGGGTACTATGCTAAGATTAACGAGGCCACTAATCCGCGACAGAACTGTTAACACATATGAGGGGGTAGGGTTCCTCTGTTAAGGCTATTTCCGAGAGTTGGAGGAAGGTTACCAAAAAGGGACGCTGAGATTTTAAGGAACACTGACCACGATATTACTGATTTATCTACATCAAGGTTCTCTGGACCCAGGTCATGGCTCTCCATTATCCATCCTAACTCTGTGTATTACCTCTAAATTGCAACGGCATTGCACTGCCAAATTTTCACAGTTTCCGAAGAATACCGCCGGAAGCCCGCTCATTCACCACGCGAGTTCTCGTTTGGCCTGGCCACCAGCCACCCACGATGATTCAAT…	Site48	11	WBGene00020915	nol-58	W01B11.3	none available	NucleOLar protein
I	3267705	3267706	f77735a8-930f-435d-92dd-64c394997b3d	356	527	+	GATGGCATTTCCCAAAGCCAGAGTCAAGTGGACTATCCAAGATCATCATCAAGTTGCTAGCAGATTCCTGAATCTGCCGCGACAGAACTGTCAACACCTTGAATTTGTCAATAGTTACCAGAGGAGTAAAGGAAGGTCAAAGAGGGATGCTGAGTTTAAACGAACTGTTCTGATAATTTATCATGAGTTTCTTGTGATAAGGTCATCGAAATTTACCACCTGCCCGCTACCAACTCTCAATACCTCAAAATCATGTTGCTTCAACACCCGGCTCACAGTTTTCGGAGAGCTCGCTGCGGTAGCCCGTTTATCACGAAATTGGATCCACCGCTTTCATCGCTGGCGGCCAGGCACCGGCACATGGCGACAATTTATGGAGCCGAGAGGCTTTTCCGTGCT…	Site48	11	WBGene00020915	nol-58	W01B11.3	none available	NucleOLar protein
I	3267705	3267706	de1de777-bf2c-4e32-969f-780b1c1b5b57	560	655	+	GATGGCATTCCCCAGAAATCTGGAAAGACTTATCCAAGATACTTCGGGTCATTGCTTAAAGACTATTAGGCCATTGGCCGTCGACAAGATACTGTCTATCCTGATCCATGTTTTGATATCTCCAGAGTTGAAGAAGGTCAAGACCTAGATTTTGCTGGAACTAGTTACATGGTTGGACCAACATCAAGGTACTTGTCGGACAAGGTTATTGGTTCGTTTACGTTGCTTACTTTCTGTATTACCCTTAGCAACGACTGTTCGCCACCGGCTTCAGTTCAAGAGCACAAGAGCCAATGCAAGATCCACCGTTTCTATTGGCCGTCCTCAGCTCGATGATTAAATTTTGGAGCAAAAGAAGGCTTTTCTTGCACCTTAGGATGAAGAAGGTACTCTCAAGAC…	Site48	11	WBGene00020915	nol-58	W01B11.3	none available	NucleOLar protein
I	3267710	3267711	a459ca1c-98fd-4272-9b72-2b1056f46723	540	663	+	CATTTCCCAGAAAATATGGAAGACATATCCTCAGATTTCATCGGTTGCGTTAAGATTATTCAGGCCGTTGCGACAGAACTGCATCAACACCGATGTGATTCACCAGAGTAAGGAAAAGGCGAGGATGCCTGAGATTGCGGGTTTGACTGATTTATTACAGGGTTTGTTGATCAGGTACAGCTTACCTTGCCCAATGTTCCAACTCGACATTACCTCAAAATATGACTGCTCCTTCATATTCCAATCTCTTCACAGTTTTCAGGAGCTTCGTCAGAGCCCGTCATCACGCAGGAGTTTCAATTTTGCGGCAAGGCACCAGCCTTGTACGATCAAATTTTGGAGCATGGAAGGCTTTCCGCGCTTAGACGTGAAGAGAGAGAGAGAACATCCTGATGGATT…	Site48	11	WBGene00020915	nol-58	W01B11.3	none available	NucleOLar protein
I	3267710	3267711	a63e43e8-fb18-4b3b-8897-9863ab2062ec	374	787	+	CATTTCCCAGAGGCGTAGATATCCAGATCATCAAGTCATTATGCTAAGATTATTAAGGCCATTGGCGCAACGGAACTATCTACAACACCGATCGCTTCGATTTTCAAGGTTGGAAGGTTTTGCAGAGGACGCTGAGATCTTATTAGGGAACTGCTACTTTTTTCTGATATTGATTCTCTATTACATCTGGTTTTACTGTGAGGTACTTTGAGCTCTATCACCGCCTCGTGTTCACATAACCTTCATAAACTACCACCAAAAACAACGACTGCTTCGTTACCAAATCTTACAGGTTCTTTTTCAAGAGCTTTCGTCGGAATGCTTCAACATTTCTTCACGTAGTCATCGCGGCCGAGGTCCTGCCACATCGACGGAACTGGAACTTGAAGCCGAGAAGGC…	Site48	11	WBGene00020915	nol-58	W01B11.3	none available	NucleOLar protein
I	3267717	3267718	4b26b00c-dd08-4d1c-84d6-2c655342c69e	605	625	+	CAGAGCTCGAAAGACTATTCCAAGACACTTCGACGACATCGCTATAAGATTATTAAGGCACTGGCACGTGTAAGATATTGTTACTCAACACATGATCTTGTTCGATTCACCGGAGTTGAAGTGGAAAAGGTCAAGAGAGAGACGCTGATTTTGCCGGATTAGCTTTTTTCGATTTTGATCTCATTCTCATAAGGTCATCGGTATGCCAGCACTGGTTACCATCCTCTGCGCTCAACTCTTTGTTACCTCAAATATTCTGTAATTCTATACCTCAAATTTTCACAACAGTTCTCTCTGGAGAGCTTGCGAGAGCCCGCTCACCATTTCTCTTTGCAGTTTACCGTTTATCGTTCAAGGCACCAATACCATATCGATGATTCAATACTCTGGAGCCGAGAA…	Site48	11	WBGene00020915	nol-58	W01B11.3	none available	NucleOLar protein
I	3267743	3267744	cb4f7b2c-798c-4262-8ed2-b4dead441ca5	606	536	+	CATCAAGCTTATCGCAAAGATTATTATATCAAGGCCATTTGGCATGCGACAGAACTGTTATCCGCTCTGCTCATGATTTTTCCAGAGGGTTGGAGGTCAAGAGGATGCTAAGATTTCGCTGGGAACAGTTACTTCTAAGTATTTGATTCAACATTCATCAAGGGTTTCGCTAGCTCCAGGGTTCATGAAATCTCTCGCCTTTACCGCTTAACTCTTGTATTACCTTTAGCTGCTGTTGTTCTTAGCCACCAATTTTCCATGGTTTCGTTAGAGCTTATCGGAGCCCGTTTACTTCATGCAGCTCTTGTTATTGGCCAGGGCACCAGCCAATCTGATTCAAATTCTTGGAGCCGAGGGCTCACCCGTGCTCTCTGAACAGGAGTTACTTTAGTGGTCTCT…	Site48	11	WBGene00020915	nol-58	W01B11.3	none available	NucleOLar protein
I	3748724	3748725	70c92fc4-dcd7-4f84-8d9a-c58c022a9dc2	240	846	-	TCATAATCCTTCACGTTGTTCTCTTCGTTTTAGAAATTTTCGCGAAGAACTCGGCCGGAACGATGTTCTTCTGTGAAACCGATTGTCCTCGTCCCTGCAGAATCGATTCTCACATGACAATAACATCATGAACACGAATCCACTGCATAACATTAAAGTAAAAGTAATGAAACACCGTCGGATTTAAGCTTGTAGTCATACGAATTTGATCGAATTTGTCTTCCAAGAGTTATCATCACCTAGAAGTTGACCAATTTGTAGAATGGTACTTAAAGGTACCTTACGTGACCAAACGAGGAACATCAATCTTCGGGTCCAGTTAACAAGGTTCAGGTGTTGGTGGCGACTCTAACTCAATGAACAGTGACCCAAAACCACTGAAACACGTAATACCTTCTC…	Site49	9	WBGene00002135	inx-13	Y8G1A.2	inx-13 encodes an innexin, an integral transmembrane channel Concise description: inx-13 encodes an innexin, an integral transmembrane channel protein that is a structural component of invertebrate gap junctions; INX-13 is essential for larval development and osmoregulation, and may be a component of the gap junctions that link the excretory and hypodermal cells; INX-13 is expressed embryonically…	INneXin
I	3748726	3748727	176be086-b4a2-4fd8-89d1-6d2a9061b0d0	169	649	-	ATAATCCTTCATATCTTCATTAAATTTCGCGAAACTCGGCCGGCTGTTTCTTCTTGACCATTATTGTCCTCGTCCTGCAGAATCGATCCCACGATGTTCGACAATGACGTCATGGAACAGATCACGTTGTTGTAACCAATTAAGTGATGTAGTGAGAACACCGTCGAGATTTGAGACCCGGAGTCGACGAATTTGTCGGTGATTTGTCTGCTTGAAAGTTGTCACCGGCGGTAGTTGTCAATTTGTAAAGGATGGGTCTCTTAGTGAACCTTGAACTAGATAGGAGCCTCGTACTACACTGCAGGTCTAACAAGGTAACCGGAATATGAGGATGAACTCTGTCAAACAGTGACAAACCACTAGGTATTGCATATACTCGTTAAGCGTTGAGGGAATAAT…	Site49	9	WBGene00002135	inx-13	Y8G1A.2	inx-13 encodes an innexin, an integral transmembrane channel Concise description: inx-13 encodes an innexin, an integral transmembrane channel protein that is a structural component of invertebrate gap junctions; INX-13 is essential for larval development and osmoregulation, and may be a component of the gap junctions that link the excretory and hypodermal cells; INX-13 is expressed embryonically…	INneXin
I	3748752	3748753	82c18756-7043-4a9c-ac88-c4c682cb1dd1	273	876	-	AATTTCGCGAACTCATTCGGCATTTTTATTGTTATGTTTCTGAAACCGATTGTCCTCGTCCTAGCAGAAGTTTCAATCCCACATGTCGAACGAATAAAAAGACGTCATGAACGGATCACCGTTGTTGAGCCTTCAATTAGAGTTAGAGTGATGAACACCGTCGGATTATTGAGACCGTAGTCGAAAATTTCGTCGAGAATTTGTCGTCCATTCGATGGTGAGTTATCGTCACTTCGGTGATACCTCAATTCGTAAGAATGGAACTTTAATGAACCTACGACCAGAACGGTGACATACTACTGCAGACTAAGGTTCCCAGGAATGAAGTACTCAACAATGAACAGGTATTGAACCACCAGTGCTACGTGAATACTCATTGTACGGTTGATCACTACACGC…	Site49	9	WBGene00002135	inx-13	Y8G1A.2	inx-13 encodes an innexin, an integral transmembrane channel Concise description: inx-13 encodes an innexin, an integral transmembrane channel protein that is a structural component of invertebrate gap junctions; INX-13 is essential for larval development and osmoregulation, and may be a component of the gap junctions that link the excretory and hypodermal cells; INX-13 is expressed embryonically…	INneXin
I	3748768	3748769	07e260fc-5968-45ad-9e8b-6a3d2ae8860f	343	611	-	GCCGGCTGTTTCTTCTTCGCTTAGATGGTAAGCTCCCAATTGTCCTCGTCCCGCAGAATTCAATCCAACGTTGTCGACAATGAACATCGGTGGTAAACACATACCAGCCGATAGCCAATTAAAGATGATGTGGTGAACACTGACAGATTGAAGCCGTAGTCGGCGAATTTGTCGAGAAATTTGTCCAGCCAAGTTGTCATCACTGGTGATGTAGCCTTCAATTTGTGGAACGGACTTAATGTGGAGCCTTACGTGCCGAACGGACGTACTACTTACGGGAACCAGTTAACAAGGTAATCAGGGTGTGGCGACTCTGACCTAATGACAGATTGAACCATTGGAACGTAATACCTTCTTCATAAACGGTTGATCATTTACACGACGAACGGAGCAATGCTT…	Site49	9	WBGene00002135	inx-13	Y8G1A.2	inx-13 encodes an innexin, an integral transmembrane channel Concise description: inx-13 encodes an innexin, an integral transmembrane channel protein that is a structural component of invertebrate gap junctions; INX-13 is essential for larval development and osmoregulation, and may be a component of the gap junctions that link the excretory and hypodermal cells; INX-13 is expressed embryonically…	INneXin
I	3748777	3748778	c7be1611-ead3-4f16-a4e6-a98284b04d39	306	637	-	TTCTTCTGAGATTGTACCTCGTCCCGCAGAAATCGATCCCAGCGCAGCGACGTCATGAGAACACGATCCAGTCGTAGAATAAACAATTAAATAAATGAAATGGTCGGTCATCGGATTGAGCTTGTAGTCGGCGAATTTGTCGGTGAATTTGTCTGCTGAGTTATCGTCGCCTGAAGTTGTACAGCTGTAGAGCGGACTGCAAAGGTATTTCAGGCCGAACAACGGACGGACTATCAGCGGGAACCAGTTGAGCGGAGTACCGGAATGAGCGACTCTTACTATAACAAGCTTAAAACCAGCTGAAAAGACATATACCCTTCTCATTAGAAGATTGTTTGTTAACTTCGGTATAGAACGGAGATATACCGGTTATTCGGAACAGCACGCACCTTCATGTTC…	Site49	9	WBGene00002135	inx-13	Y8G1A.2	inx-13 encodes an innexin, an integral transmembrane channel Concise description: inx-13 encodes an innexin, an integral transmembrane channel protein that is a structural component of invertebrate gap junctions; INX-13 is essential for larval development and osmoregulation, and may be a component of the gap junctions that link the excretory and hypodermal cells; INX-13 is expressed embryonically…	INneXin
I	3748794	3748795	aca9f6b7-e766-4c48-bd32-37ad582519d8	347	625	-	GTCCTCGTCCTTACGAAGTTCAATATCCCATAGTCGACGAAATGACGTCATGAGTGAACAATACGGTATCCACCGTTGTTGCCTTATTAAAAAATGAAGACACCGTCGGAATTTTAAGAAGGTGACCCAGAGTAGTCGAATTTGTACGAAATTTGTACCAGAGTTACCTGTCATCACTGAAGTTGTACTCAATTTGTAAAAGGTGATGGACTTAGAATGTGGAACCTCGCGGCCGGAACGGGTGCATCAACTCGGGTCTCAATGACGAAGTAGCCTCGGAAATGACGAACTCCGACAATGAAACAAGGATGGTAGACCCAAACCACTGAAGCCACGTATACCTTCATAAAAGACAAAATGATCATTATCAGCACACGGACGAGGTATATACCGTTGCTG…	Site49	9	WBGene00002135	inx-13	Y8G1A.2	inx-13 encodes an innexin, an integral transmembrane channel Concise description: inx-13 encodes an innexin, an integral transmembrane channel protein that is a structural component of invertebrate gap junctions; INX-13 is essential for larval development and osmoregulation, and may be a component of the gap junctions that link the excretory and hypodermal cells; INX-13 is expressed embryonically…	INneXin
I	3748794	3748795	0dad1387-00e9-4180-a2e2-cf9430dcd601	345	371	-	GTCCTCGTCCTACAAATCGATACTCACAGAGTCGACGGTCATGAAACACAAATCACTGTTGATAACAATTAATAGATGAGACACCGGAATTCAGAGCTTGTAGTCGCGACGAATTTCGTAACAAGAATTTGTCCCATGTTATCGTCACTTTGAAGTTAGACCTCAATTTGTAAGTTGGTACTTTAGTAAAGCCTACGTGCTAAACGGTGACGACTACTTGCAGGAACCAGTTGCTTTAAGTTCAGTGGTTGACTCTTACAATGCCTTTTAAGCCAAACAGGTCGAATACCTTCTCGCATAAACAGAATCATCAGTCGAACGGTGCGTGTGGCAACCAGTTGCCGATACGCACCTTATCGCGGTTGTTACTC	Site49	9	WBGene00002135	inx-13	Y8G1A.2	inx-13 encodes an innexin, an integral transmembrane channel Concise description: inx-13 encodes an innexin, an integral transmembrane channel protein that is a structural component of invertebrate gap junctions; INX-13 is essential for larval development and osmoregulation, and may be a component of the gap junctions that link the excretory and hypodermal cells; INX-13 is expressed embryonically…	INneXin
I	3748798	3748799	0477cd35-5df2-488e-ba63-96c7cb980fca	348	451	-	TCGTCCTGCAAGGTTCAATCCTTCACAGTCGATATATAACATCATAAGAGAAACGAGTCACCGTATAGCCAATTAAGTAAAATGAAACAGTCATCGCAGATTATAGAACTCGTAGTATCATTATAAAATTTGTACAGAATTTATCAATTTCAAGAATAACCTCATCACTCGAAGTTGTCCTCAATTTATATGTGATGGAACTAGAGATGAAGCCTGCGTGACCAGACAAAGCCCTGACCACCGATACGGGAACTATAAACAAGGTAATCGGAATGTGACGACTCTCTTGTACAGTACAGTGTGACCTCGAAACCACAGGCTGAACACGTGAATTACCCTCTCACGAAACAGAGTTGAATCATCGTACTACACACGGCACACGGTGACAGAAGGTGTGGT…	Site49	9	WBGene00002135	inx-13	Y8G1A.2	inx-13 encodes an innexin, an integral transmembrane channel Concise description: inx-13 encodes an innexin, an integral transmembrane channel protein that is a structural component of invertebrate gap junctions; INX-13 is essential for larval development and osmoregulation, and may be a component of the gap junctions that link the excretory and hypodermal cells; INX-13 is expressed embryonically…	INneXin
I	3748816	3748817	a820dc7f-24c2-434a-a745-cc26fb1deb4f	326	668	-	TCCCACATGTCGACGAGACGTCATGAAGAAACGGATCCACATATGGTTGTAACTTATTAAGTGTTAAGTATGAAGAGACACTGTCGGAGGATTGAGCTTGTAGTCGGCAGATTTGTCGGGTGACTGGTCTATTCGGAGTTGACCCTACACTGGAGCATCCTTATTCGTGGATAGGACTGCGGAGCCTTGCTGGACTCGGGTCTTTTAACAAGAATCAAGGATAAGGCGACTCCGACAGTAATGACAGAAGCCAGAACCACCAGAACACGTATACCTTCTCATTGAAACGGTTGATCATCAGGTTACGGATAGGAAATGCTTGTTGCCGGCTACACACACCTCGGTAATCGCGGCGTGGGAAGCTTGGGTGTCCAGCTCTCTCTCCTCCCCCCCCGGCAT…	Site49	9	WBGene00002135	inx-13	Y8G1A.2	inx-13 encodes an innexin, an integral transmembrane channel Concise description: inx-13 encodes an innexin, an integral transmembrane channel protein that is a structural component of invertebrate gap junctions; INX-13 is essential for larval development and osmoregulation, and may be a component of the gap junctions that link the excretory and hypodermal cells; INX-13 is expressed embryonically…	INneXin
I	3748865	3748866	53dd40e9-0fc2-4db5-a40a-90d1bead2c87	426	511	-	TATCGATTAAATGAGTAGTGACACTGTCGGAGCAGAGACTTGTAGTCGACGATTTGTCGAAATTTGTCCAGCTCGAGTTATCGTCACCAAGTTGTCCAATTGTAGATAGGACTATGTAAGAGCCCAGAGCTAGACGGAACATCAGTTACCTCTTACGGGAACCAGTTGCAGTGTAGTCGGTTAAGCGACTCCGACTTAACAAGGAAGCCAAAAGCTACGGGTGATCGAATAACTTCTCGCGAAAGGTTAATCATATCAGCAGACAGAAACGATATGCTTGTTGCAGGTCGCACGCACAGTTCACACGGTTACTTAGGGTGACCATTTTCTCCCATTCGCCCATTCAAAATGTCGGAAAGGATTCAAAGACCCAAAGAAGGTGTGGAGATGACAGGAAAG…	Site50	7	WBGene00002135	inx-13	Y8G1A.2	inx-13 encodes an innexin, an integral transmembrane channel Concise description: inx-13 encodes an innexin, an integral transmembrane channel protein that is a structural component of invertebrate gap junctions; INX-13 is essential for larval development and osmoregulation, and may be a component of the gap junctions that link the excretory and hypodermal cells; INX-13 is expressed embryonically…	INneXin
I	3748903	3748904	291477a5-7002-425e-95b2-ccc21761b0b6	467	453	-	AGCTTGTAGTCGAATTTGTCGTAATTTGTGTCCATTTCGAAGTTATCGTCTACCCAAGAAGTTGTCAATTTGTAAATAGGACTCGAAGTAAAGCCTTGACGTGCCGAACACGGAACATCAACTTGCGGGTCCAGTTAACAAGGTTCAGGATGAGGAAGCGACTCTAGCCTTTAGACAAACCTTGAACTTTCAGAACTGCGAATACATTGAACAGAATCATCCAGCATTGGTACAAGGTGTGTGACGGTAATGTCTAATAACCAAAGCACACAAGCACCTCGATCACACAAATACCCGGGAAACTCATACCATACAGAGATTCAAGACCAGTGGTGTTGTAGAACAGGAAAGCGTAATGAAGAAATGATAATTCGGAAACGGTATTTGAAGACCAAGGAA…	Site50	7	WBGene00002135	inx-13	Y8G1A.2	inx-13 encodes an innexin, an integral transmembrane channel Concise description: inx-13 encodes an innexin, an integral transmembrane channel protein that is a structural component of invertebrate gap junctions; INX-13 is essential for larval development and osmoregulation, and may be a component of the gap junctions that link the excretory and hypodermal cells; INX-13 is expressed embryonically…	INneXin
I	3748903	3748904	1d692108-13a2-479a-86ae-7602c462fc78	456	379	-	AGCTTGTAGTCGACGAATTTGTAACAAATTTGTCCAGCTATGTAATAGTACCATCACCTAGAAGTTGTAAACCTTCAATTTGTAAAGGAATGGACTAGTAAAGGTATTCTTCGTGCCGACGGTACGTACTACGGGTGCTGTTAGATAAGGTTCGGAATGGCGACTCGACAAACAAGCCAGAAACTTTCAGACGGTATACTCATTAAACAATAAAATCATCAGCACGGCGGAACGGTGAAACGAGCTTCGTTATTTGCACACACACACCTAAATCGCAGCGTGGTTACTCGGGAAACCGCTCTCCTCCTCCCTGCCCTCGCCTAATTCAGTGTAATCGGAATTCCCAAGACCCCAGAGGATGGAAGTGCCGAGGAAGATG	Site50	7	WBGene00002135	inx-13	Y8G1A.2	inx-13 encodes an innexin, an integral transmembrane channel Concise description: inx-13 encodes an innexin, an integral transmembrane channel protein that is a structural component of invertebrate gap junctions; INX-13 is essential for larval development and osmoregulation, and may be a component of the gap junctions that link the excretory and hypodermal cells; INX-13 is expressed embryonically…	INneXin
I	3748923	3748924	06ab9346-1a07-4636-86b8-e5c1163b1c7b	536	676	-	GTCGAGAATTTATCCACCAAGAAGTTATCGTCACTGAAGTTGTCCTCATTTGTGGAATAGGACTTAAGTGAGAGCCTTGCCGAACGACGGAACATCAACCAGCGGGTCCAGTTAACCTAAAGGTAAAGGTTCGGAATGGATATGACTCAGCAATGACAAGCCAGAAAACAGCATGGTGACGTGAATACCTCTGATAAACATGTTGTAATCATCGCTGCCGCCGCACACGGCGGTGCGGTAAACGGTTGCTTGTATTCGAGCACACGCACCCGAAATATCGCACGGTTCTTGGGAAGTGAACCATTTCTCCTCCCATTCCGGCCATATTCCTAAACGAGGAGCATTCAAGAACCTCAGTGAAGGTGTGGAGTGCCGAGGAAGTTGTTAGAAGAGTTAAAA…	Site50	7	WBGene00002135	inx-13	Y8G1A.2	inx-13 encodes an innexin, an integral transmembrane channel Concise description: inx-13 encodes an innexin, an integral transmembrane channel protein that is a structural component of invertebrate gap junctions; INX-13 is essential for larval development and osmoregulation, and may be a component of the gap junctions that link the excretory and hypodermal cells; INX-13 is expressed embryonically…	INneXin
I	3748926	3748927	4f55eef2-a59a-4e73-bbbb-e769c7c47920	474	446	-	GAGAATTTGTCCATTTCGCGGAGTTGATCGTCACTGAGTTGTCAATTTGTGAGATAGGACTTAGAAGCCTTGGCCGGATGAGGACGGTATCAACTTGCGGGTCCAGTTGACAAGGTTCAGGTGGTTGTGGCGACTCTTATCGATGACAAGGCCGACCAGGAGCATGTTACCTCTCATTAGAAGACGGTTGAATCATCAGCGGAAACGGAAACACCGAATGCTTGGTCACACCAAAATCACGGCATGTTACTCTTGGGAAACCGCTCTCTTCCTGATTTCAACGCCATTCAGTAATGTCGGAGAGGATTTGCTCTTAGAACAAGGTGGATGGAGAGTGCAGGAAGTTATGAGAATGTTGAATTGGAAGAAGACGATTTGACAAGTAAGGAACTTGACAAG…	Site50	7	WBGene00002135	inx-13	Y8G1A.2	inx-13 encodes an innexin, an integral transmembrane channel Concise description: inx-13 encodes an innexin, an integral transmembrane channel protein that is a structural component of invertebrate gap junctions; INX-13 is essential for larval development and osmoregulation, and may be a component of the gap junctions that link the excretory and hypodermal cells; INX-13 is expressed embryonically…	INneXin
I	3748926	3748927	6bc7550f-eb7e-403e-ba79-9a7dc1a1b3eb	496	371	-	GAGAATTTGTCCATTTCGATGTAGTTGATTCATCACCTAGAAGTTGCCTCAATTTGTATGGAACTTAGTAAAGGAAGCCTTGCGCCGGTTAGGTCGTACTACTGCGGGAACCAGTTAACAAGGTAGCTGGAATGTGGCGACTCTAACAATGACAGACCAGAACCGCTGAAACACGCGTATAGCTTCATTGAGACGATGATGATCATCAGCACACGGCGGACGGTGTAGAACGGAGTAGCTTGTTGCAGGAACACACGCACCTAAAATCGCAGACGGAATACTTAGGAAGAAACCATTTCTCCCATTTCTTACGCCTAGCTAAAGTACAGGTAAGGATTCAAGACCCCAGTGGTATGGTGTACGAGGAAGAG	Site50	7	WBGene00002135	inx-13	Y8G1A.2	inx-13 encodes an innexin, an integral transmembrane channel Concise description: inx-13 encodes an innexin, an integral transmembrane channel protein that is a structural component of invertebrate gap junctions; INX-13 is essential for larval development and osmoregulation, and may be a component of the gap junctions that link the excretory and hypodermal cells; INX-13 is expressed embryonically…	INneXin
I	3748927	3748928	f5ec3b6a-a5c4-4cdb-b353-c43eea8f577a	396	149	-	AGAATTTGTCTACTCAAGAATGACGTCACCAAGTTGTCCTCAATTGTTTATCTAATCTATCCAACAACCTTACTACTTCTCACCAATCTGGTTAATTCTTAGATAGCGGTATCTATCAGCCTAACCTAAAACAAGGAAATTGTGAATAC	Site50	7	WBGene00002135	inx-13	Y8G1A.2	inx-13 encodes an innexin, an integral transmembrane channel Concise description: inx-13 encodes an innexin, an integral transmembrane channel protein that is a structural component of invertebrate gap junctions; INX-13 is essential for larval development and osmoregulation, and may be a component of the gap junctions that link the excretory and hypodermal cells; INX-13 is expressed embryonically…	INneXin
I	3749438	3749439	660d0f4a-cd1b-41f1-9ffe-022ec7e28230	441	414	-	CGTCACTGAATAGAGCTCAATTGTGATGGACTTACATAGAGCCTTACGTGCTGCGACGGTGAACGTCAACCCGGAACCAATGACATGTTCAGGTGATGAGATATCCTAACAACAGCATGACCATTGGTCGCGTATTACCTTCCTACATTGAACGAGTTGAATCATCACACATTGGTGCGGAGCGATGCTTCGGTTGCCGTATTCGCACCCCTAAATCGTTACTCTCAGGGTGACCATTCTCCCCATTCCAGAGCCATTCAAGATGTTCGGATTCCAGAACCCCAAAAGGTGTTGTGAATGCCGAATAAGAATGACGAAAAGCAGCAAAACTAAGTAAGGTGACTTGAACGAATAGGTATCGATGTAGCCTCCGTAGGAAGTATTAAATGTGATGCTGCA…	Site51	12	WBGene00002135	inx-13	Y8G1A.2	inx-13 encodes an innexin, an integral transmembrane channel Concise description: inx-13 encodes an innexin, an integral transmembrane channel protein that is a structural component of invertebrate gap junctions; INX-13 is essential for larval development and osmoregulation, and may be a component of the gap junctions that link the excretory and hypodermal cells; INX-13 is expressed embryonically…	INneXin
I	3749454	3749455	2313f02a-0c33-481a-9496-02ab2c5df30b	517	314	-	CTCAATTTCAGTAAAAGAATAAGGTGTGTGTGTGGTAAACAATGAAGCCCGAGCTAGATAGAACATACTACTACGGGTCAGTTAACTAAGTAGTTCTAAATGAAGCGAACTCCAACAGTAACAAGAACTAACCAATTGGTATTATACCACTCATTAAAACAGTTAATCATACTTCACAACGAACGGTGTGTAACAATACCCAATGCCATAGCTCACACACTAATCACAATACTTGGGAGAAACCGCTCTCCCAGCCGCCTCATTCAAGAATGTACGAGGATTCAAACAGAAGGTGATGAGGAGAGTGCAGGAAG	Site51	12	WBGene00002135	inx-13	Y8G1A.2	inx-13 encodes an innexin, an integral transmembrane channel Concise description: inx-13 encodes an innexin, an integral transmembrane channel protein that is a structural component of invertebrate gap junctions; INX-13 is essential for larval development and osmoregulation, and may be a component of the gap junctions that link the excretory and hypodermal cells; INX-13 is expressed embryonically…	INneXin
I	3749454	3749455	a5af807d-ef03-4a06-bb4f-f6ada2cfeab1	530	230	-	CTCAATTTGCAAAGGAATAATGGACTATGTAAAGGAAGCCTTGCGCCGAATAGGACGACCACGCAGGGAACCAGTTGCAGTAGATCAGGATGAAGGATATGACTCCAACAAGAAACATAATTAGATTGAACCAACGGAACAGAATACCTTCTCATTAGATTGTTGATCACCGCCGATAGTGGCAAGGAGAACGATGCTTGCCGAGAGCCACCCAAAATCACGCCGATGTT	Site51	12	WBGene00002135	inx-13	Y8G1A.2	inx-13 encodes an innexin, an integral transmembrane channel Concise description: inx-13 encodes an innexin, an integral transmembrane channel protein that is a structural component of invertebrate gap junctions; INX-13 is essential for larval development and osmoregulation, and may be a component of the gap junctions that link the excretory and hypodermal cells; INX-13 is expressed embryonically…	INneXin
I	3749454	3749455	ae52e316-2925-4c28-aa8e-ca1d681d21d4	454	303	-	CTCAATTTGTAAAGCAGGTACCGATGAAGCCTTGACAGATAGAGGATCAGCGGGAACTAACAAAGGTTCAGATATGGATAGAACTCTTGCTTAACAAGCCAAACCACAGGAACAGATACCCTTCTCTCATTAAAACGGTTGATCATCGCAACACGGTTAAGGTCGGTGGAGAAACGACCGTTAGCACACGCACCGAAATCACACGAATCTCTCCAGGGGAAACCATTTCTCCTCCATTCCTTGCCATTTCAGTTGTCGGAGTGGATTTCAGTGCCCCAAGAAGAGGATGGAGAGTGCAGGAAG	Site51	12	WBGene00002135	inx-13	Y8G1A.2	inx-13 encodes an innexin, an integral transmembrane channel Concise description: inx-13 encodes an innexin, an integral transmembrane channel protein that is a structural component of invertebrate gap junctions; INX-13 is essential for larval development and osmoregulation, and may be a component of the gap junctions that link the excretory and hypodermal cells; INX-13 is expressed embryonically…	INneXin
I	3749454	3749455	102d65ec-c77e-4a50-8f54-3b0f765c7bec	503	414	-	CTCAATTTATTGTAGCGGGTCTATAATGATGAAGCCTGCGGCGCCGAACGGAACATCAGTCTCGGAGCTATTATAACAAAGGTTCGGTTAGAGCGAACTCCGACAATGACAAGCTTAAACAGGAACACGTATACTCATTAAACGGTTGTCATCAGCACATGCAGAACGGAGAGCAAAGCGCTTGATGCAGGAGCACACGCACCAGAAATCGAGCGTTGGTTACTCTTGGGAGAAACCGCTCTCCTCCCGATTCATTCATTCAAAATGGAACGAGGTGGATTTCAAGACCCAAAGGTTGGTGGTTGCTGATGGAATAAAGAATGAGGTGTGATGATGAACGGAGAAGACGATATTGAACTAGTGTGCAGACAAATAGGTGTACAAGTAGGAAAGGTAGCT…	Site51	12	WBGene00002135	inx-13	Y8G1A.2	inx-13 encodes an innexin, an integral transmembrane channel Concise description: inx-13 encodes an innexin, an integral transmembrane channel protein that is a structural component of invertebrate gap junctions; INX-13 is essential for larval development and osmoregulation, and may be a component of the gap junctions that link the excretory and hypodermal cells; INX-13 is expressed embryonically…	INneXin
I	3749454	3749455	a6d738f0-fceb-4265-95e3-81534c484076	484	417	-	CTCAATTTAAATAAGGACTGAGTGAAGCCTCGGCGCCAAACGAGACGACTACCACAGACCAGTTAACAAAGGAATCAGGAATGGCGCTCCAACAATGACAAGCCAGAACCATTGGTGAACAGCGTATACGCCTCGCGCAACATGTTGTTCATCAGCACACGGTACGGAAAGGTATGTAAATGCCGAATGCTAGAACACGCACCTAAATCGCACCGATGTTACTTCTCTTGGGAAACCATTCTTCCTCCCATCGCCACTAATGTCGAGGTGGATTTTCCAAGCCCCAGAGGATGAAGGGAAGTGACAAGGTGATGGTTAAATTGGTGACAAATTGAAACTAATGTGTAAGGAACATGGTGTACGGTTGGAAACAGTGATGGAAAGGGTATTGCCTCTGTG…	Site51	12	WBGene00002135	inx-13	Y8G1A.2	inx-13 encodes an innexin, an integral transmembrane channel Concise description: inx-13 encodes an innexin, an integral transmembrane channel protein that is a structural component of invertebrate gap junctions; INX-13 is essential for larval development and osmoregulation, and may be a component of the gap junctions that link the excretory and hypodermal cells; INX-13 is expressed embryonically…	INneXin
I	3749497	3749498	2876f2e5-a34d-4164-a0d0-60f6f789a126	542	399	-	CGGAACATCAGTCAGTAGGTCCAGTTAACAAGGTAATACCGGAATAGTGGCGAACTCCAACAATGACAAGCCAGAACAATTGGAGACATACCTTCTCATTGAACGGTTGAATATCATTTACGGCAACGGCAGACGAGGTGAACGATACCGTTGCCGAACACACACACACACCTAAATATCACGGCCGATGTTCTTTTGGGGAAGAACCATTTCTCCCATTCAGCGCCCATTCAGTGTTGTCGGTGTGGAATTCCAGACCTTAGAGGTGTGGAGATGACCGAGGAAGTTGTTGAGAATGAGAGTGAAATTGGTGGTGAAACGTTTTGAGACCCAAGTAAGGAACTTGACAAGTTATGGTATTTGATGGAAAAAGGTGCTGCCTGTAGGTAAGTATAGATG	Site51	12	WBGene00002135	inx-13	Y8G1A.2	inx-13 encodes an innexin, an integral transmembrane channel Concise description: inx-13 encodes an innexin, an integral transmembrane channel protein that is a structural component of invertebrate gap junctions; INX-13 is essential for larval development and osmoregulation, and may be a component of the gap junctions that link the excretory and hypodermal cells; INX-13 is expressed embryonically…	INneXin
I	3749505	3749506	fa97279d-48cd-4446-aa6e-4124114e3d56	484	514	-	CAACTTGCGGGACTATATGACGAAGTTCAGGAATGAGCGACCGACAATGACAATAGAGCCAGAACCACAGGAAAGTCACGTAGAACATTACCTTCTCCAAACGTTGTTATCATCAGCACACGGATTGGGTTGCTGTTATTGCTGAGTTTTGCTGTCGCACTCACGTTCACACCATAATCCCGGAGTACCGCTCTCTCCCATTTCAGCACCCAATTCCTTTAGCAGTCGGAATTTCAAGACCCCAGAGATGGTTGCTAGAGGAAGATATAGAAGTATGAATTGGTGAAATTTTGAGGAACTAGTAAAGGTCTTGACAAGTTTAGGTCAAGTAAAAAGGTAACATGTATTAATTAACGTATTGAGTAGAACGTAATGAGCTCAATAGCCGGATAGCTTCGA…	Site51	12	WBGene00002135	inx-13	Y8G1A.2	inx-13 encodes an innexin, an integral transmembrane channel Concise description: inx-13 encodes an innexin, an integral transmembrane channel protein that is a structural component of invertebrate gap junctions; INX-13 is essential for larval development and osmoregulation, and may be a component of the gap junctions that link the excretory and hypodermal cells; INX-13 is expressed embryonically…	INneXin
I	3749505	3749506	1a472908-37df-4dfa-a9ae-cd7df97ae5da	535	280	-	CAACTTGCAGGGTAGGTGGTCTTAATGACATGGTTTCCAGGATGGCGAACTCTCGCAGCAAATGACCAAGCCTTGAGCTACGGAGCGGTATACCTTCCTCGGCAAAGCGCGTTGATCATCAACACACATTGTACGGGAGAAACGAATGCTTGTTGGCCGACGCACCCGTAACACACCAAGTGGTTCTCGGGAAGTGTACCATTCATTCCGCACATTCATGTCGGGAGGATTCAAGACTTAGAGAGATGAGGTAGGCTATGGAAGTTAATAAAGAATAAAA	Site51	12	WBGene00002135	inx-13	Y8G1A.2	inx-13 encodes an innexin, an integral transmembrane channel Concise description: inx-13 encodes an innexin, an integral transmembrane channel protein that is a structural component of invertebrate gap junctions; INX-13 is essential for larval development and osmoregulation, and may be a component of the gap junctions that link the excretory and hypodermal cells; INX-13 is expressed embryonically…	INneXin
I	3749531	3749532	95c7b93c-3cda-45e2-90ad-d010673fecd3	610	356	-	TCAGGAATATGTGGCGACTCTGTCAATGACAAGCCAGACCATTGCTGGTCAGCTAATACCTCATGAACGGTTGAATCGTTCAGCACACGGTACGAGAACGAATGTCCACGTTGCAGTGCAACAACGCCTCGAATCACACGATGTTACTTAGGAAGAAACCATTCCTCCCATTCACGCCTGCCATTTCAGAATGTCGGAGAGGAGATTCCAAGACCTTTAGTGGTGTGGAAGTGCAGAGGAATAGAGTTGAGAAAATGTATTGGTGAAGCAATTATGAACTAGTATGATGGAAACTTGACAAGTTAGGTAAACATGTAGGAAAAGGTAACCGCCTCCGTAGGAAAAGTAACAGAATG	Site51	12	WBGene00002135	inx-13	Y8G1A.2	inx-13 encodes an innexin, an integral transmembrane channel Concise description: inx-13 encodes an innexin, an integral transmembrane channel protein that is a structural component of invertebrate gap junctions; INX-13 is essential for larval development and osmoregulation, and may be a component of the gap junctions that link the excretory and hypodermal cells; INX-13 is expressed embryonically…	INneXin
I	3749531	3749532	93043f41-bd32-4784-9e1d-8c982d12587c	635	328	-	TCAGGAATGGAGACTCTGCTTAACAGACCTAAACCACTGGTCAACGTGTTCTCACGCAAACGGTTGAAGTTCATCAGCACGGACGGAAACGATGCTTGTTGCAGTGCACAGTGATACGGTTACTCTCCAGGGAACTGCTCTCTCCTAGCCTCGCCATCAAGTACGAGGTGGTGGAGATTTCAAGACCCCAGAAGGTGTGGAAGTGCAGGAATGTTGAGAGATGTTGAATATTGGTGGTGGTGAAAATTTGAACTAAGTAGTGTAGATGGAAACTTGGACGTGTTTGGTCAAGTAGGTGAAGGTAGCTGCCTCTGTAGGTGAGCAGAGG	Site51	12	WBGene00002135	inx-13	Y8G1A.2	inx-13 encodes an innexin, an integral transmembrane channel Concise description: inx-13 encodes an innexin, an integral transmembrane channel protein that is a structural component of invertebrate gap junctions; INX-13 is essential for larval development and osmoregulation, and may be a component of the gap junctions that link the excretory and hypodermal cells; INX-13 is expressed embryonically…	INneXin
I	3749533	3749534	3c263cdb-7285-4a0c-b916-ee6b17df105f	577	140	-	AGGAATGTAGTACTCTAACCTTAGACAGTGAACCTAAACCATTTGGAACCGTTAACGAATCTCATACGAAACCACCTAGAATGATCATCAGCAGAACGGTGTAAACGATATACTTGTTACCAAACCACACCTCGATGATA	Site51	12	WBGene00002135	inx-13	Y8G1A.2	inx-13 encodes an innexin, an integral transmembrane channel Concise description: inx-13 encodes an innexin, an integral transmembrane channel protein that is a structural component of invertebrate gap junctions; INX-13 is essential for larval development and osmoregulation, and may be a component of the gap junctions that link the excretory and hypodermal cells; INX-13 is expressed embryonically…	INneXin
I	3749542	3749543	eb4eab42-d055-4e71-b20c-f944a5f66d6d	461	313	-	GCGACTCCAACCAACAAGCCAAACCACAGGAACCAGTATCCTTCTCATTAAACGTTGATCGCATCGCACAAACGGTATTGTGTGTGAACGATGCTGAATGCCATATCGCACCTAAAGTCGCACGATGTTACTCTTGGAAAGAACCATTTCTTCCATTCAGCCATATCAAAATGACGGTGTGATTTCCAAACCTCAGAGATGGAGAAAGTGCAGGAAATAAGTATGAAGAATGATGAATTGGAAACATATTGAACAAGTAAGGAAGAACTGACAAATAGGAACAAGGTAAGGTATTACCGTAGGAAGTCGAATG	Site52	6	WBGene00002135	inx-13	Y8G1A.2	inx-13 encodes an innexin, an integral transmembrane channel Concise description: inx-13 encodes an innexin, an integral transmembrane channel protein that is a structural component of invertebrate gap junctions; INX-13 is essential for larval development and osmoregulation, and may be a component of the gap junctions that link the excretory and hypodermal cells; INX-13 is expressed embryonically…	INneXin
I	3749542	3749543	ec5230a0-98b8-4fb7-9fdd-a9b88f7b778f	616	371	-	GCGACTCCCAACAATGACAAGGAGCCGAACACGGAGGACGCGGTTTAACTTTTCGGCAGAACGGTTGAATCATCAGCACACAAGGTCGCTTCAGGTTGACAATGCTTGTTACGCTGGTGACGCCGACCTCAAAAGTCAGCGCCGATGTTACTCGAGGGAAGTCCGCCTCTCCTCCCATTCAGGCCTGATTTCAAAGTAACAGGATTTTCCTAACAGTAGAGATGAGGAGTGACCGGTGATAAGTTGAAGTGTTGTTGAAATTGGTGGTAGCAATTCGAACAATGGTTGGAACTTGACAAAATAGGTCAAAGTAGGGTAAGGTGTAACAACACCGGTAGGAAGTTTGAAGATGCCAACGATAAGAGCAAAAG	Site52	6	WBGene00002135	inx-13	Y8G1A.2	inx-13 encodes an innexin, an integral transmembrane channel Concise description: inx-13 encodes an innexin, an integral transmembrane channel protein that is a structural component of invertebrate gap junctions; INX-13 is essential for larval development and osmoregulation, and may be a component of the gap junctions that link the excretory and hypodermal cells; INX-13 is expressed embryonically…	INneXin
I	3749547	3749548	894f8327-0fb5-4809-a94e-60b5884de95b	596	388	-	TCCGACAATGACAAGCCAGAACCAGCAGGAACACGTATACCTTCTGCGCGAACGGTTGATCATCGCAGCGGCGGTAACGACGGAGACGATGATACCCCGTTGCTGATAACACACGCCTCGATGATCACGGTTGTTCTGGGAGACCGCTCTCCTCCCATTCACGCCCGCCTAGACGGGTGGATTCCAAGACCCAGAGGATGGAAGTGACAGGAGAGTTGTTGAGATGTAATTGGTGGAAACGATTTAGATCGATGGTTGGAACCAGTGCGATTGGTGAAACATAGGGAAAAGGTAACCGCTCCGTAGGAAAGTACAAATGTATTAACGATGTAACAGAGCAAGAAGAGAGTAAAGAGATTCGTGTGGTTAAGCTTCTTAGCTGATGCTC	Site52	6	WBGene00002135	inx-13	Y8G1A.2	inx-13 encodes an innexin, an integral transmembrane channel Concise description: inx-13 encodes an innexin, an integral transmembrane channel protein that is a structural component of invertebrate gap junctions; INX-13 is essential for larval development and osmoregulation, and may be a component of the gap junctions that link the excretory and hypodermal cells; INX-13 is expressed embryonically…	INneXin
I	3749551	3749552	40a8aeb1-536e-4bae-b893-d262573de453	628	334	-	ACAATGACAGTAAGCTTGAACCACAGGAACACATATTACCTTCTATAAACGGTAATATCATTTGCACATTGGTGGCGTGGAACGATGCTTGTATGCAGTGCTCGGCACCTCATGAATATCACACATAATACTCTTGGGTAAACCATTTTCTCTCCTCCCCATTCGCCCGATTCAAGATGTCGGGTGTGGAACACTTTTGACCCAAAGGTGTGGAAAGTGCCGAGGAATAGAGTAGAGAATAAAATGAGTTTGGAAAGACGGATTTTGGATACCCAAGTAGAGGAAGACAGGTAGGAAACAAGTAAGGTAGCCGCCCTCTGATGGAAGTAACAAA	Site52	6	WBGene00002135	inx-13	Y8G1A.2	inx-13 encodes an innexin, an integral transmembrane channel Concise description: inx-13 encodes an innexin, an integral transmembrane channel protein that is a structural component of invertebrate gap junctions; INX-13 is essential for larval development and osmoregulation, and may be a component of the gap junctions that link the excretory and hypodermal cells; INX-13 is expressed embryonically…	INneXin
I	3749551	3749552	439f7d2b-dafb-4059-84d0-97ddf98b3924	366	360	-	ACAATGACGAGCCAGAGAACAGGAAACGTATACCTTCTGCAGAACGATGTTAAAAGTCATCAGCACATTAGACATGGAGATAGTCGTTACCATAATTACACGCACTCGATCACATGAGTTCTTGGAAAGAAACCATTTCTCCTGCTCGCCATTCAGCAATGTCGAGATTTGAGTAGTCTCCAGTAGAGGTGTTGATGACAGGAAATGTTGAATGATGAATTGAGACGAATTCGAACTTGATGGAAACAGAACAGAATGGTCAAGTAGGAAGAGGTAGCTGCCTCTGTAGGAAAAATGCAGAAGTGCAGCAAACGAATTAAAGTAGAAATTCGTGGTTGAGCTCCAGCAATTGGAACGACA	Site52	6	WBGene00002135	inx-13	Y8G1A.2	inx-13 encodes an innexin, an integral transmembrane channel Concise description: inx-13 encodes an innexin, an integral transmembrane channel protein that is a structural component of invertebrate gap junctions; INX-13 is essential for larval development and osmoregulation, and may be a component of the gap junctions that link the excretory and hypodermal cells; INX-13 is expressed embryonically…	INneXin
I	3749553	3749554	341d09e8-ad64-4f2e-9e78-0b543ae2ccac	677	522	-	AATGACAAGCCAGAACCGCCGGTCACATAGCCTCATTGATTCATATGATCATTGTCAGCACGCCGGCGCAGGATCGGTGTGACGGTTACGTTGCCGAGTTCCACCAGCACCTTCGATCACGGTTACTCTTTGGGAAAGATTTTCTCCTCCCTAGCCCGCTCATTTCCTTTAGAATGTCGGTGTGTGAGATTCTTAACCCAGTAGAGGTTGAGGTAAAGCCGAGGAATGTTGTTGAATGATGATGAAATTGGAAGACAAATTAAAACCATGATGGAAACTTGACAAATAGGTGAAACAAGTAGGTAAAGGTGAATTACCGGTAAGGAAGTATAAGTATTTAACGAAAGAAAAACAGAAATTGAAGTAAAGAGAGATTCGTAGGTAAAGCTCCGTTAATTT…	Site52	6	WBGene00002135	inx-13	Y8G1A.2	inx-13 encodes an innexin, an integral transmembrane channel Concise description: inx-13 encodes an innexin, an integral transmembrane channel protein that is a structural component of invertebrate gap junctions; INX-13 is essential for larval development and osmoregulation, and may be a component of the gap junctions that link the excretory and hypodermal cells; INX-13 is expressed embryonically…	INneXin
I	3750383	3750384	f412e484-db8d-4b6c-8461-6e36425958a7	629	313	-	ATTGAACATGTTGAATCATCAGCACACACACACACACACACACATTGGACGGTGGTGAACGGTTGCCCCAAGTTGCCGAACACACACCAACGACCTCGATGTAAAATCGCACGGTTACTCCAGGGAAGATTTATTCTCCCATTCAACGCCCATTCAAATGTCGATGGAGATTCCAAGACCCAAAGGTGTATGAGGAAGTGAGCCATGGAAGTTATAAGTTAATAACTGAGACAGCTTCTAAACTTGATGGAAATCTAGATTGAATTGGTAAACTTAGGTAGAGGTAATATCCACCTCTGTAGGGAAGTCAATG	Site53	8	WBGene00002135	inx-13	Y8G1A.2	inx-13 encodes an innexin, an integral transmembrane channel Concise description: inx-13 encodes an innexin, an integral transmembrane channel protein that is a structural component of invertebrate gap junctions; INX-13 is essential for larval development and osmoregulation, and may be a component of the gap junctions that link the excretory and hypodermal cells; INX-13 is expressed embryonically…	INneXin
I	3750399	3750400	bd22fbd8-5dd3-4292-b42d-eba39505a811	688	247	-	ATCAGCACGGCGGACGGTGGGTACGATAACCCGATGCTAACACACACCTTTGAATCACACGTTGTTCCTGGGGAAACCATTCCTCATTCACCTAACTCAGTACGGGTGTGGATTTCCCAAACAAGGAGAAGGGTGTGCCGGAATGATGGATAAGAATGTGATTGATGGGAACGATTTCGAACTATTGATGGAACTTGACAAATAGGTCAGTAGGTAAGGAAGCCGCCTTCCGTAGGAAAGTCGAATG	Site53	8	WBGene00002135	inx-13	Y8G1A.2	inx-13 encodes an innexin, an integral transmembrane channel Concise description: inx-13 encodes an innexin, an integral transmembrane channel protein that is a structural component of invertebrate gap junctions; INX-13 is essential for larval development and osmoregulation, and may be a component of the gap junctions that link the excretory and hypodermal cells; INX-13 is expressed embryonically…	INneXin
I	3750399	3750400	93ed8fec-abbc-4cec-ac5b-d4410ffa49c5	716	162	-	ATCAGCACACGGCAGATGGAACGGTGTAAAACGATACCGTTACCAATTCACCTAAAGTTCACGGTTCTCAGGGAAAGAAACCGCTCCTCATTCCTTCGCCCAATTCAGAATGTCGGTGGAATTTCTTAACCCAGTAGAGAGTGGAAAATGACCATGGTGAAG	Site53	8	WBGene00002135	inx-13	Y8G1A.2	inx-13 encodes an innexin, an integral transmembrane channel Concise description: inx-13 encodes an innexin, an integral transmembrane channel protein that is a structural component of invertebrate gap junctions; INX-13 is essential for larval development and osmoregulation, and may be a component of the gap junctions that link the excretory and hypodermal cells; INX-13 is expressed embryonically…	INneXin
I	3750399	3750400	f77d5d04-5c52-4f6c-9381-a81229d897d9	657	277	-	ATCAGCACGACGGTGTGCGGTGGCGACCGCTGTTGCTGGTGCCATGCGCCGCTCGCCTCGAAATCGACGGTGTTACTTGGGAAACCGCTCTCCCATTCCCACGCCTAGCTCTAAATGTCGGATTTCTTGAACCCTTAGAGAGGATGGAAAGTGCTAGAGGAAGTTGTTGAGAATGAATTGGTGACGATTTAAACCATATGGTAGGAAACTTGGATAAAATAGGTACAGTTGGTTAGGGAAAGGTAACCGCCTCCGTAGGGTGGTGAAATGCCGAGAT	Site53	8	WBGene00002135	inx-13	Y8G1A.2	inx-13 encodes an innexin, an integral transmembrane channel Concise description: inx-13 encodes an innexin, an integral transmembrane channel protein that is a structural component of invertebrate gap junctions; INX-13 is essential for larval development and osmoregulation, and may be a component of the gap junctions that link the excretory and hypodermal cells; INX-13 is expressed embryonically…	INneXin
I	3750429	3750430	654aef65-e7a3-4073-8d85-8a2ec9eed89f	603	266	-	TTGTTGCCATTCGCGCACCTCGAAAATCGCGGTAATCTCTTGGAAGTGACCGCCTCCCATTCCTTGCCCATTCATAGCGGGATCTGGATTCCAAGAACCCTTTGAGGAAGTGCCGAAGTTGTTAGAGTAGTAAAGCGGAAACGACGACTTAAGGAACTTGACAAATAGGAGATCAAGGTAGAGGAGAGCTGCCTCCGTAGGAAGTACGATGTATTTAATTGACGATTGAGTAGAGAATTCGTGATTTCCCATAAATTGGCAGCTTG	Site53	8	WBGene00002135	inx-13	Y8G1A.2	inx-13 encodes an innexin, an integral transmembrane channel Concise description: inx-13 encodes an innexin, an integral transmembrane channel protein that is a structural component of invertebrate gap junctions; INX-13 is essential for larval development and osmoregulation, and may be a component of the gap junctions that link the excretory and hypodermal cells; INX-13 is expressed embryonically…	INneXin
I	3750429	3750430	8369fd95-efd6-4256-94e3-cf254e07da93	632	425	-	TTGTTGCCAGGCCAGCGCACCTGAAAATCGCGGCCGGTTCTTGGGTGAAACCGCTCTCCTCCCATAGCCTCGGCCATTTCAGTGATGTCGGAGAGGATTTTTCAAGACCTTAGAGAGGTGATGGAGTACCAAGGAAGAGTTATAAGTGTTAATAGAAATTAAGGAAACAATTCGAACAGTGGTTGGAAACTTGACAAAGCGGTATTGATGGGTAAGCCAGCCTGTAGGAAAAATACCTTTAAGTATTTTAGCAAATAAATTAAAGGTTGAAAATCGTAAATAGACTCTAATTCGGTTACCCATAGCAGGCCTCATCAATCTTACTAACCCAGCTCTAGTGCCTGGACAAGCCAACTCTTGATAAAGTTCGTTGAGTCACTTAAAGAGAAAATAGTGTGT…	Site53	8	WBGene00002135	inx-13	Y8G1A.2	inx-13 encodes an innexin, an integral transmembrane channel Concise description: inx-13 encodes an innexin, an integral transmembrane channel protein that is a structural component of invertebrate gap junctions; INX-13 is essential for larval development and osmoregulation, and may be a component of the gap junctions that link the excretory and hypodermal cells; INX-13 is expressed embryonically…	INneXin
I	3750440	3750441	93a98891-7755-4998-a647-b42773ff7ef9	634	231	-	CACACGCACCCGATATCGCTGGTTACTTGGGAAAGACCATTCTCCCATTCGCCCATTCAAAATGTCGAGGATTCCAAGACCCCCAGAAGAGGAGATGTTGTGGTTGTCCATGGTAGTTATAAGAAGTTAACCGAAGGAAACAATCGAAACTTAGATGGAACTTGAACAAATTGGTACAAATGGGTAACCAGCTCTGTAGGAAGTTCAGTGTAACTAATTAACAAATTTGAA	Site53	8	WBGene00002135	inx-13	Y8G1A.2	inx-13 encodes an innexin, an integral transmembrane channel Concise description: inx-13 encodes an innexin, an integral transmembrane channel protein that is a structural component of invertebrate gap junctions; INX-13 is essential for larval development and osmoregulation, and may be a component of the gap junctions that link the excretory and hypodermal cells; INX-13 is expressed embryonically…	INneXin
I	3750446	3750447	ccb36c58-77e1-4f42-bbc3-1b3a378ab4a1	689	204	-	CACCTCGAATCACAGGTTCTCTGGAAACCATTTCTTCCCATTCACGCCTAATCAGAATGTCGGTGAGATTTCAGAACAGTGGATGGAAGTGCCGGTGGTAATAGAAGAAATGTAGCGGTGGAAACGATTTGAAACCAAGGTAAGTAGTTGTGAACTTGAACGATAGGAACAAGAGTAGGTAGCTGCCTCTGTGGAAATGCAGAT	Site53	8	WBGene00002135	inx-13	Y8G1A.2	inx-13 encodes an innexin, an integral transmembrane channel Concise description: inx-13 encodes an innexin, an integral transmembrane channel protein that is a structural component of invertebrate gap junctions; INX-13 is essential for larval development and osmoregulation, and may be a component of the gap junctions that link the excretory and hypodermal cells; INX-13 is expressed embryonically…	INneXin
I	3751568	3751569	d0173c5e-0f8f-41a8-a702-9609fff4adcc	719	342	-	TCCCATTCACGCCATTCATGGTTGTCGGTGGATCTGTAACCTTAGAGTATTAGTGGAAGTTAATTGGTACGATTTGATAAGGTCCAAGTAAGGAAACTTGACAATGGTATTGAATGGAAATTACACCGTAAAGGTAACAAAGGTATTAAATAAGAGTTTGTAAGAGTAAAGAAAAGATTTCGTGGTAAAAGTGTCAGTAATTGATAGCTTCGATATAGGCTTCTTCATACCAACTTTCGAATTTGGCTCTAGAGCAGCTCTCAAACAACAGAATGTGTACACGATGTCACCAGATGGAAAATAAAGAGATGGCCGAAGGTAGTCTGTAGATGTAGGTAGGTA	Site54	5	WBGene00002135	inx-13	Y8G1A.2	inx-13 encodes an innexin, an integral transmembrane channel Concise description: inx-13 encodes an innexin, an integral transmembrane channel protein that is a structural component of invertebrate gap junctions; INX-13 is essential for larval development and osmoregulation, and may be a component of the gap junctions that link the excretory and hypodermal cells; INX-13 is expressed embryonically…	INneXin
I	3751568	3751569	9357dfb0-d754-4bc8-992b-5e00c5ec6605	729	242	-	TCCCATTCGCCCATTCAGTGTCATGGATTCCGAAACCTTCCCAGAAGGATGAGGAGTATTAGGAAATGAGAATGTTGAATTGGAAGACAATCGAACTAGTGATGGAACTTGAACAGAGATAGGTGTTAACGATAGGGTAACCACCTCTGTAAGGGTGAATTAACGAGATGCGAAATATTAAAGTAAAATTCATGTAAAATGAAGCCTCTATAATTTAAACAACCTGCGTTACGATATTACGG	Site54	5	WBGene00002135	inx-13	Y8G1A.2	inx-13 encodes an innexin, an integral transmembrane channel Concise description: inx-13 encodes an innexin, an integral transmembrane channel protein that is a structural component of invertebrate gap junctions; INX-13 is essential for larval development and osmoregulation, and may be a component of the gap junctions that link the excretory and hypodermal cells; INX-13 is expressed embryonically…	INneXin
I	3751588	3751589	7d0a3021-9c95-4f18-977c-52104279d353	731	222	-	AATGTCGGAAGGAATCCCGAAACCTAGAGAGAGGATGAGGTAGTACCAGGAATAGAAGTTGTTGATAATTCGGTGAAACAATTAAACTTTAGTGTAATGGAAGACTTACAAGTTAGGTAAACTACCGATGTTGGGTAAAGGTAACCAGCCTGTAGGAAATACAAGTAACAATTCGAAAAATCAAACATGAAGAGTAGAAAACCTGTAGTGGTGCCTCCAATA	Site54	5	WBGene00002135	inx-13	Y8G1A.2	inx-13 encodes an innexin, an integral transmembrane channel Concise description: inx-13 encodes an innexin, an integral transmembrane channel protein that is a structural component of invertebrate gap junctions; INX-13 is essential for larval development and osmoregulation, and may be a component of the gap junctions that link the excretory and hypodermal cells; INX-13 is expressed embryonically…	INneXin
I	3751607	3751608	3c263cdb-7285-4a0c-b916-ee6b17df105f	782	341	-	AGACCCCAAAGGAGTGGAAGTGCAGGAATAAAGTAAGAAATGATGATTTGACGATTTGAGCATGAATGGAACTTGACTAGATGGTACTATTAGCGAGTAGGTAAGGTAACCGCCTCCGTAGGTAGCAGTATGTGTGTATTTAGCGAAAAACGATGACGAAAGTAAAATTCCTGAAATGAATGACTATAATAACGCAGACCCCATTCGCGTTACGGGCCCTCTCATCCCATCAGCTGACTCTGTAACCCGCCTCGAACAACTGAGTGATCATATAACACCCAAATGGTGATGAGGTTGGCTTGATGATGATGTCTGCTGCTCGCCTGATCTTGGATGAGGTA	Site54	5	WBGene00002135	inx-13	Y8G1A.2	inx-13 encodes an innexin, an integral transmembrane channel Concise description: inx-13 encodes an innexin, an integral transmembrane channel protein that is a structural component of invertebrate gap junctions; INX-13 is essential for larval development and osmoregulation, and may be a component of the gap junctions that link the excretory and hypodermal cells; INX-13 is expressed embryonically…	INneXin
I	3751631	3751632	febf706f-1958-4c1a-82e4-dda3d499949d	790	113	-	CCGAGGAAGTTGTGTTGAGGTTGATGATTGGTGAAACGGTTTGGTCGAGGTGTGTGGGTGACTTGGACGGCGGGTGCTGATGGTAGGAGAATTACCGTAGGTGATGCAGGTTG	Site54	5	WBGene00002135	inx-13	Y8G1A.2	inx-13 encodes an innexin, an integral transmembrane channel Concise description: inx-13 encodes an innexin, an integral transmembrane channel protein that is a structural component of invertebrate gap junctions; INX-13 is essential for larval development and osmoregulation, and may be a component of the gap junctions that link the excretory and hypodermal cells; INX-13 is expressed embryonically…	INneXin
I	3788050	3788051	b20b67d5-b59c-4921-9679-843868d9f049	25	455	+	CGTGGAAAACCGAAATGTTGGGCGTCGTCCATCACCGCAAGCTCTTGGCTTACAAGCGCGTAAGACCTGGTTCGACCAATCCAGCTTCATAAACTCACCACTGAAGACAGGATTGTTAAGCAAAGGCTGTCGAATCGTTTCCGCCAGTTGCTGACTTTCAAGATCCTGTTGCCACCGTTGCCTCCACAGAAGAGATCATCCTGGATTGCTTTCTTGGACCGGGTTACCAAGAGCTCAAGGCCAACCGGAATCTCCAGGCTACAGGCCCGTTTATTGAATCGCTGATGTGAGAAGAAACTATAGTTGAGACATTAAGGCTAACGCTGTATTGTTAGGGAGTTTTGGCTGGGTTATCACCTGAAGAAGGCTGGTGTTTGGGAATGGGCTCCCAGGATTTTC…	Site55	5	WBGene00004425	rpl-13	C32E8.2	rpl-13 encodes a large ribosomal subunit L13 protein.	Ribosomal Protein, Large subunit
I	3788083	3788084	92f584c7-89ea-47c9-90e9-3b318ba2ba15	63	397	+	CGCAAGCACTGGCACAAGCGCGCTGGATTAACAGCTTCGACCAGCCAGTCAAACCCGCAGACAGATTCGAGCTAAGGCATCAATAATAATAAATACCATGCAATAAATCATCACTCCTCGCCCTGGTAGTTGCAGCTACTACCACAAGATTTGTTTTGCTTCCGTTATCCCTCCTTGTTAGAGAATGCTCTATTCCGATGGGTTAATCTTGCTGGACGTGGTTTCAAGAGCTCAGGCTGCCGGAAAATCCTTACACCCAGGCGCAGGCCCGCACCTTATGAATCGCCGCTGATGTGAGAAGACTATCAAGACCGCTGTGTAGGACACTGAGGCTTCCTGCCGATAAGTACAAAGCCGGGGTCTATCTTCCCGAAGAGGCTAGCGCAGTGGATAGCTT	Site55	5	WBGene00004425	rpl-13	C32E8.2	rpl-13 encodes a large ribosomal subunit L13 protein.	Ribosomal Protein, Large subunit
I	3788115	3788116	d7fb0b2e-1d69-4d71-b33e-ce0341130b08	83	325	+	GTTCGACCAGCCGGCTCATTCGCAGAAGACGGAACCGTCTGGCTTGAAATTGTAAATTATCTGCCAGTTATTGGACTCTCAGATACACTGTCGTTCGTTGCCTCACAGAAGAGATACATTATTAGAACACTGGTTCTAAGAATTTCAGGCCGCCGGGAATTTCCTCAGGCTCTACAGGCCTCGTCACATAGAATTGCTGGGTCGTGAGAAGAACAACAAAGTTCGCTGAGGAGTTAAGGCATCAACGCTGTATTGTTACTTCTGGAGTTTGGTCGAGCTTATTTTCACCAAGAAGTTGGTGCGTCATCGAAAGAAGGACAGCTCT	Site55	5	WBGene00004425	rpl-13	C32E8.2	rpl-13 encodes a large ribosomal subunit L13 protein.	Ribosomal Protein, Large subunit
I	3788120	3788121	16f12303-7308-4b20-85e1-9cae3c78d903	107	321	+	ACCAGCCAGCTTCGTAAAACTCCACCGCGAGAAGACAGAACCGTCAAGCTAAGGCTGTCGAGCTGCCACCGCCCCAGTTGCTGGACTTCTCAGATTTGTTGTCATCATGTTGTCCTCCAAGAAGATACTATTCAGAGACATTGTTCTTGGACCGGTACTAAGAGCTAGGCTGCAGAGAGGTTACTTCAAGGCTAAGGCCGTTTATAGAATTGGTGAAGGAGAAGAGAACTAGGACTGTTGAGGACTAAGGCATATCGCGATTGTTAGAGTAAGCTGGGTTATCTTGAAGAGGAAATTGTGTTACCAAAGAGGTACGGCTTT	Site55	5	WBGene00004425	rpl-13	C32E8.2	rpl-13 encodes a large ribosomal subunit L13 protein.	Ribosomal Protein, Large subunit
I	3788149	3788150	a191e509-bb78-451d-a680-895e1aea472a	124	303	+	CAGAACCGTCAAGCTAAGGCTGTTGGCTATCCGCCCCAGTTGTTGGTTACTAGATCTGTTGTTTTGCTGCCACAACAGAGGAGAGAGAGTACTAACTTGGATTGTTAGACATGGTTAAGAGCTTGGCTGCCGGAATTCAAGGCTAAGGCCACCAATCTATTGAATTCATCTTGATGTTGAGAAGAACAACAAGACTGCTGAGACATCAAGGCCATCCGATCGTACGAGTTTCGAGCGCAAGCACTAAACACCCGAAGGCTAGCGCACCGAGAAGGAGACAGCTTGTTGAGGAGGAAATCAGGG	Site55	5	WBGene00004425	rpl-13	C32E8.2	rpl-13 encodes a large ribosomal subunit L13 protein.	Ribosomal Protein, Large subunit
I	3788154	3788155	7a6f3cb0-b3c6-4a3c-8d0f-0278a0d88449	145	295	+	CCGTCAAGCTAAGGCTGGGCTCGGCTAACCATGCCGAAGAGAAGTATTACGTGTCAGATCTGTTGTCAATATCCACAGAAGAGATCTATTCAAAGACTCTGTTAGTCAAAGGTTTCATCAGAGCACCAGGCCATGCGAATCTCCCAGGCTCCGTTAGGCCCGCACATCGGAATAATCGACCGAGAAGAGAACTATCAGACATCGAGGGACTTAAGGCTCAACGCCGATATTCGCTTTAGGAGTACGGGGCAAGCTATCTTCCCTGAATAGCGTGTCATCAAAGAAGGACAGCACT	Site56	6	WBGene00004425	rpl-13	C32E8.2	rpl-13 encodes a large ribosomal subunit L13 protein.	Ribosomal Protein, Large subunit
I	3788154	3788155	fb6a8288-b9b8-47c8-8532-a9a24c4653ac	76	301	+	CCGTCAAGCTTGAATTGTTGGCATTCCTCGCCCCGGTAACTGGACTTTCCAGATCAAGCATCACCGCGCCGAGAAGAGATACTATCCAGTATGTTGGGACCGGTTTCAAGAGCTCAAGGCCGCCGGAATACCCAGGCTCAGGCCTGCCACCATTATGGATATCGGGTCAGAAGAACCATCAAGACCATACGAGGACCTTGAGGCCAACGTCGAATCGTTTTCGGGGAGAGTACTGGGCTCAGCTTATCCTTTCCCGAAGAATTAGCGCGTCAAGAAGAGGTGTTCACTGCTGAAATTTCAG	Site56	6	WBGene00004425	rpl-13	C32E8.2	rpl-13 encodes a large ribosomal subunit L13 protein.	Ribosomal Protein, Large subunit
I	3788162	3788163	4fd1105c-4731-45b5-ad57-69e950c87017	133	287	+	CTAAGGCTGTTGTTGAAAATTCGCTTCGCCCAGTTGCTGACCAAGATCTGTGTCGTTCGTTGCCTCAGAAGAGATTCTATCTCGGACTTGCATAGCTCCGGCTTACCAAAGAGCTCAAGGCCGCCGGAATCCCAGGCTAGGCCTGCTCAACAACGGAATTTGCTGACGCGTGAGAAGAACAACAAGACCGCCGAGGGACTTCGCCGCTGAGGGCCAACGCTCGTTTCGGGAGTCTGGCATGTTTATTTTCCCCGTGAAATCGGCAATACCCAAGAAAGGACGGTCCT	Site56	6	WBGene00004425	rpl-13	C32E8.2	rpl-13 encodes a large ribosomal subunit L13 protein.	Ribosomal Protein, Large subunit
I	3788167	3788168	cd31b144-502e-4225-9586-802f5dddc510	147	292	+	GCTGTCGAAATCGCTTTGCCAGTTGCTGGTTCAGATTCTGTCGCTGCCATGTGTCCCAAGAAGATCTCCATTATCCTGACTTTAACGTTAAGACCGTGGTTTCTGAGAGCTTCAAGGCGTCAGAAATCTCCAGAAGCCAAGGCCCGTACAACAGAATCGCTGATGTGAGAAGAACCATACAAGACCAATGAAGGACTTGAAACGCCGATCGTCTTGGAGTTTACGAAAGCATGAAGGGTTTATTTTACCCGAAGAAAGGCATTGGCCGTCCCCTGAGAAGGAGAGACGACCT	Site56	6	WBGene00004425	rpl-13	C32E8.2	rpl-13 encodes a large ribosomal subunit L13 protein.	Ribosomal Protein, Large subunit
I	3788192	3788193	5209eb25-e315-4904-9697-c9ee130b791d	165	274	+	TTGCTGGACACTCACTCAGATCATTGTCGTTCGTTGGCCTCACCAAGAAGAGATACAACACGCAGGACTTACTGTTCTGGACGTGGTTTCTAAGAGCTCAGAGGCCAAACAGAATTTCCACAGGCTCAGGCCTATACCATAGGAATTACGTTCTGATGCAGGGAAGAGACTATTAGACCGCCGAGGACTCTTGAGGCTCAACGCGTGTATGTTACCAAGGAGGTACAAGCCGTTCTATTTTACCCGAAGAGGAAGCGCTCAAGAAGTTGGTCAT	Site56	6	WBGene00004425	rpl-13	C32E8.2	rpl-13 encodes a large ribosomal subunit L13 protein.	Ribosomal Protein, Large subunit
I	3788192	3788193	6b5c53e7-fa9a-4ac9-8aa3-322b16fa10db	188	272	+	TTGCTGGACTTACCTTGATTCTGTTGTCTCGTTGCACCATCAGAAGATACATATCTCAAGACTTCTCTATCGGTCCGTGGTTTCTAAGAGCTTCAAGGCCGTCGGAATCACCTCAGGCTCAGGCCTCGTTCATGGAATTCCGCCGACGTGAGAAGAACAACAACGAGTTGCCGAGGACTTGGCGTTTCAACGAACGTTTCACCAAGAAAGTTTTACAATCTAGGTCTATTTACCCGAAGAAGGCTTTAGCGTACAAAGAAGGATGGTACCAT	Site56	6	WBGene00004425	rpl-13	C32E8.2	rpl-13 encodes a large ribosomal subunit L13 protein.	Ribosomal Protein, Large subunit
I	3788667	3788668	d4f19a2e-694c-4614-82cc-503d88bdf96d	436	968	+	CTCAAGGTTGCCGCCCAACTTTATGGAGATGTCCTTCACCCACCATTCAAACGAGCCGCCAAGTTACATCGACGTCGAACGCAAGGTTGAGATTACAAGACTTCCGCAAGGTTGGACAAGAAATCTTGGAAAGCTGAGAAGAGCCAGAGAGGCATCGAGGAGAATAGTAATTGATTCGTTTCATAATAATATCGAAAGTTATTAAAATACCTCCATCCTCCTACACTTACACCTCTATCATCAACTATTTACAACATCATTTTATCCTTATCCTCCACCATCCCTACAACTTCCTTAAAAAAAAAAATCCAGTACTAAGGTCTTAATCTACTCAAATCATGTTGATATCAACCACAAGCACGATCGCGTCGCCAAGACGGCACCAAAGAGTGAGAACCC…	Site57	13	WBGene00004425	rpl-13	C32E8.2	rpl-13 encodes a large ribosomal subunit L13 protein.	Ribosomal Protein, Large subunit
I	3788667	3788668	9a65f4f0-79f7-4fb8-a89b-5dbd4afc00aa	424	405	+	CTCAAGGTTGCCGCCCATCAACTTCGGGATGTCCACCCCACACCATCACCTTCGATGGCACGCCAAGTTACCGACCGAACGCTGTTAGATTTTCAGATCTCCGCAAGGCGTGCTGACAAGAATCCGTGGAAAGCGTGAGTAGAGCCAGAGGCCGTTGAGGAATTGGCCGATAATTGTTGATTTTGTTCAATTGTTATGAAATCCCATCCCTACTCATCCCATCATCATCATATTCAACCCGCCCCAAAAAAAAAAAAAAAAAAAAAAAAAAAAAAAAAAAAAAAAAAAAAAAAAAAAAAAAAAAAAAAAAAAAAAAAAAAAAAAAAAAAAAAAAAAAAAAAAAAAAAAAAAAAAAAAAAAAAAAAAAAAAAAAAAAAAAAAAAAAAAAAAAAAAAAAAA…	Site57	13	WBGene00004425	rpl-13	C32E8.2	rpl-13 encodes a large ribosomal subunit L13 protein.	Ribosomal Protein, Large subunit
I	3788667	3788668	2f364ad9-fe4c-4dc4-8a5a-cf8f3a0acb60	428	321	+	CTCAAGGTTATCTCGCCCATTTGCGGAGGATGTCCTTTACCCACACTCTTCGACGAGCCACGTCTGGTTTCGACGTTGAACGTAAGGTTGAGATTTTTAGATTCGTAAGGAGCGTAAGTTAGAATTTGGAAAAAGCTGAAGAGCAAGAGGCATATTGAGGAGAATAGTAATTGTTGATTTCACTGTTTAATTGCATTGAAAGTTAAAATCCAACCTCCATCCTATTCTATATCAACCTGCCACCATCCAAAAAAAAAAAAAAAAAAAAAAAAAAAAAAAAAAAAAAAAAAAAAAAAAAAAAAAAAAAAAAAAAAAAAAAAA	Site57	13	WBGene00004425	rpl-13	C32E8.2	rpl-13 encodes a large ribosomal subunit L13 protein.	Ribosomal Protein, Large subunit
I	3788667	3788668	1c4786b6-f466-4658-9c3e-c17a06d2c495	453	359	+	CTCAAGGTGCCGCCTCAACTTTTCGGGGATGTCACCACTTTTTCCCTCCACTTCCTTTCGACGAGCCACGCCAAAATTCTCGACGTCGAACGCTGGGTTGGGATTCTAGACTTCCGCGGGGAGCGTGCTGGTTAGAATCTAAAGCGGGAGGGATAAGGCCATTGGAGAATAAGTGCTGTTGATTTTGTTTAAACTGTTATGAAAGTTAAATCCCGTTATCAACTATCCATTTTCAACGCCTATCCAAAAAAAAAAAAAAAAAAAAAAAAAAAAAAAAAAAAAAAAAAAAAAAAAAAAAAAAAAAAAAAAAAAAAAAAAAAAAAAAAAAAAAAAAAAAAAAAAAAAAAAAAAAAAAAAAA	Site57	13	WBGene00004425	rpl-13	C32E8.2	rpl-13 encodes a large ribosomal subunit L13 protein.	Ribosomal Protein, Large subunit
I	3788667	3788668	eeb39bcd-c931-493d-b771-012038763218	409	1051	+	CTCAAGGTTGCCGCCTCAACTCGCAGATGTCCACCACATCACCCACACCATCACCGACGAGCACGCCTTGAACATGACGCCGAACGCTGGTCGAGATTCAGAACACCGTCAAGGAGCGTGCTGACAAGAAATCTCTTGGAGCGTGAGAAGAGCAGAGAGGCCGAGGAGAATAAGTAAATTGATTCTTGTTACATAAACTTGCTATGAAATACCTCCCTACACTCCCACCATCATCATCATACTATCCTCCCCTACAACACCCTAAAAATCCGTTGCCAATACTATATTCTCGTTTTCATTGTTTACCAATGTCCAGAATTTCAATTGTCAACATAGCTGCCGTGAGGATTGTTATTATCATGTACTGCTCAAGTTCAAACTCTAACTGGAGCTACAAGA…	Site57	13	WBGene00004425	rpl-13	C32E8.2	rpl-13 encodes a large ribosomal subunit L13 protein.	Ribosomal Protein, Large subunit
I	3788667	3788668	d322854d-fbe1-4b3b-b868-585aa161c7fc	428	1320	+	CTCAAGGTTGCCGCCTAACATGGAGATGTCCTTCACCCACCATTACCACATCGATGCACGCTCAAGGTTTCGACGCCGAAACGCAGGTGAGATTTTTACAAGATTACCGCGAGGGAGCGTGCTGACAAGAAAATCTAAGAAGGTAAGAAGAGCCAGAGGCCGTTGAGGAGAATTAGTAAATTGATTTCGTTTAATTAAATATATGAAAGAAAATCCCACTCCTACTCATCCCACATATCATATTCTATCAACCATTCCCACCTATTTCCACTAATTAAAAACCCTTCGAGTCGGAGAGGTTGGCTGCTGTGGTTGGTGAGGCTATACAGGTCACCGATACCTTCTATCAAGGCTATTCTTGACTCAAGAATCCGAGTTCTGTTGGAGTGCTGGTTTTGC…	Site57	13	WBGene00004425	rpl-13	C32E8.2	rpl-13 encodes a large ribosomal subunit L13 protein.	Ribosomal Protein, Large subunit
I	3788667	3788668	f166711c-3c87-4fad-98f1-1ab0400b2979	435	348	+	CTCAAGGTTGCCGCCTCATTCATAGATGTCTCCCTACCTACCTCTTATTTCGACGAAAATACGTCAAGTTTCGATGCCTGGTAAGATTTTCAGATTCCGCAAGGCTGAAGGAAATCTGTGGAGCGTGAGTAGAGCAGAGGCCGTTGAATAAGTAATTGTTGATTTCTGTTTAATCAATATGAAAATCCCACTTTACTCCCCTCATTCAACCCATATCCATACAACCTATCCCTCTATCCTACCAAAAAAAAAAAAAAAAAAAAAAAAAAAAAAAAAAAAAAAAAAAAAAAAAAAAAAAAAAAAAAAAAAAAAAAAAAAAAAAAAAAAAAAAAAAAAAAAAAAAAAAAA	Site57	13	WBGene00004425	rpl-13	C32E8.2	rpl-13 encodes a large ribosomal subunit L13 protein.	Ribosomal Protein, Large subunit
I	3788670	3788671	8548c4d5-9950-4e3c-bcfd-d7a120bbe420	426	284	+	AAGGTTGCTCGTCCTCAACTTCGCAGATGTCCACATCCTCACTCTCTGTCGGCACGTTCAAGGTTGCCACGAACGCTGGTTGAGATTCTCTAGAACATCTCTGCGAGGCTGCTGACAAGAAATCTAAAGGCGAGAAGAGAGCAAGGAATACTGAGGATAGTAAATTGGTGAAGAGTTCAATTCATTAATTAAATATATGAAGTAAAATACCCACTCCTACTACAACCCTCTATCATTTCATATTTCATTATCCACCAACCTATTTCCACATCATCAAAAAAAAA	Site57	13	WBGene00004425	rpl-13	C32E8.2	rpl-13 encodes a large ribosomal subunit L13 protein.	Ribosomal Protein, Large subunit
I	3788673	3788674	a7a2eafb-a238-427d-a2e4-cc42dc217e56	426	332	+	GTTGCCGCCCATCAACTCGCAGATGTCCTTTACCCTCCATCACCGACGGCCACGCTTAAGTTCGCCCTCGAACGCGTAGGGTTGAGATCACCGATTCCGCCAGCGTGCCGATAAGGCTTGGAGCGTGAGTGATAAAGAGTGGCCGTGGGAATTGTAATTGATTTCTTGTTCTGCTATGGCTATGAAAAAAAAAAAAAAAAAAAAAAAATCCCCTACCCGTTATACCATCAACCTGCCCATCCCTACATCCTAAAAAAAAAAAAAAAAAAAAAAAAAAAAAAAAAAAAAAAAAAAAAAAAAAAAAAAAAAAAAAAAAAAAAAAAAAAAAAAAA	Site57	13	WBGene00004425	rpl-13	C32E8.2	rpl-13 encodes a large ribosomal subunit L13 protein.	Ribosomal Protein, Large subunit
I	3788676	3788677	2f324f80-079d-4d57-9e7a-00fb4cbb7b50	452	353	+	GCCGCCCAACTTCGCGGAGATGTCCTTTCCCACTTTCGTACCAAGTTACCGACGCCGAACGCAAAGGTCGAGATTTTTTCTAGATCAAGGAGCGTGCTGTCAAGGCTTACGTGGAAAGCGAGGGAAGAGCCAGAGGCCGTTGAATAGTAAATTGTTGATTTTGTTTCAATTAATATCGAAAGTTAAAATCCCATCCATCCTAACCTCATTTATTTCGTTAACCCCTATCCAAAAAAAAAAAAAAAAAAAAAAAAAAAAAAAAAAAAAAAAAAAAAAAAAAAAAAAAAAAAAAAAAAAAAAAAAAAAAAAAAAAAAAAAAAAAAAAAAAAAAAAAAAAAAAAAAAAAAAAAAAA	Site57	13	WBGene00004425	rpl-13	C32E8.2	rpl-13 encodes a large ribosomal subunit L13 protein.	Ribosomal Protein, Large subunit
I	3788695	3788696	2617e932-a622-4994-854f-65b8e102930c	446	470	+	ATGTCCTTTCCCACACACCATCACCTTCGACAAGCCGCCAAGTTACCGATGCCGAACGCAAGGTCGAGATTTTTCAGATTCCGCAAGGAGCCGTTGGTCAGAATCTTGGTTAAGTAGAGAGCCAGAGGCCGTTGAGGAGAAACAGTAAATTGTTGATTTCTGTTCAATTAATATCGAAAGTTAAAATTCCCTACCCCATCTACTCCCATCTTATTCCATATCAACCTGCCCCATCCATCCCTATCCTACCAAAAAAAAAAAAAAAAAAAAAAAAAAAAAAAAAAAAAAAAAAAAAAAAAAAAAAAAAAAAAAAAAAAAAAAAAAAAAAAAAAAAAAAAAAAAAAAAAAAAAAAAAAAAAAAAAAAAAAAAAAAAAAAAAAAAAAAAAAAAAAAAAAAAA…	Site57	13	WBGene00004425	rpl-13	C32E8.2	rpl-13 encodes a large ribosomal subunit L13 protein.	Ribosomal Protein, Large subunit
I	3788708	3788709	3abb75db-6991-4d9a-9ef5-694149352218	456	326	+	TTCCCACACTACCTTCGACGAAGCCGCCAAGTTTTGACGTTGAACGCTGATTGAGAGATTTTCTAGATCGTAAGGCTGCTGACAAGAAAGCGGCTTAAGAAGTTGAGAGCAAGAGGCTGCTGAGAATATAGTAAATTGATTTCTGTTTTAAACTGTTATGAAAGTTAAATCCACTCCTATTATTTATCATCCGCCTATTCTAAAAAAAAAAAAAAAAAAAAAAAAAAAAAAAAAAAAAAAAAAAAAAAAAAAAAAAAAAAAAAAAAAAAAAAAAAAAAAAAAAAAAAAAAAAAAAAAAAAAAAAAAAAAAAAAAAAAAAAAAAAAA	Site57	13	WBGene00004425	rpl-13	C32E8.2	rpl-13 encodes a large ribosomal subunit L13 protein.	Ribosomal Protein, Large subunit
I	3788757	3788758	5995e824-f7f3-4dd8-97ed-977a51f1feb2	524	101	+	CGCAAGGTTAGAGATCAGAACATCCGTCCAGGTGCCAGGTCCAGCGAGTGCCAGGTATCCGATCCGTCAGGATCCTGGCGAAAAAAAAAAAAAAAAAAAAA	Site57	13	WBGene00004425	rpl-13	C32E8.2	rpl-13 encodes a large ribosomal subunit L13 protein.	Ribosomal Protein, Large subunit
I	3788856	3788857	2d5c0e69-910e-462f-bec9-b7b4ae863df6	562	568	+	AAGTAAATTGTTGATTTGTTTTAAACTGTATGAATCCCATCCCATCCCACATCATCATCCATCATCCAACCCCATCCCGCTTCCAAAAAAAAAAAAAAAAAAAAAAAAAAAAAAAAAAAAAAAAAAAAAAAAAAAAAAAAAAAAAAAAAAAAAAAAAAAAAAAAAAAAAAAAAAAAAAAAAAAAAAAAAAAAAAAAAAAAAAAACCCCTGACATGATGCCACCAACCAACCAAGACGACGACGACCGCCGAGAAGTCGAAGGCCATCAGCAACTATACGATACAAGCCCGATGTTGAGCCAGAGAACCATGGTGCTTTATCTTTGCTCTTGGATTTAATCCATCAATCTACTGGTTATGCTGGGTGCTGGATGTTTTATTCTATCTCTACCCAAATCTT…	Site58	12	WBGene00004425	rpl-13	C32E8.2	rpl-13 encodes a large ribosomal subunit L13 protein.	Ribosomal Protein, Large subunit
I	3788860	3788861	fac04593-1a79-4227-9a01-fb59a4807d7f	636	161	+	AAATTGTTGATTTTGTTAATTGTTGAAAGTAACAGTGATTACCAAATTCCTATTATTATATTTATATTATCCACATCATCCTAAAAAAAAAAAAAAAAAAAAAAAAAAAAAAAAAAAAAAAAAAAAAAAAAAAAAAAAAAAAAAAAAAAAAAAAAAAAAAA	Site58	12	WBGene00004425	rpl-13	C32E8.2	rpl-13 encodes a large ribosomal subunit L13 protein.	Ribosomal Protein, Large subunit
I	3788865	3788866	a8be2fc5-42ea-43ab-93c4-e6aee67c4902	595	192	+	GTTGATTTTCTGTTCAATTGCATCGTAGTAAATCCCATCCATCCTATCATATCATATCTATATCAACCCGCCAAAAAAAAAAAAAAAAAAAAAAAAAAAAAAAAAAAAAAAAAAAAAAAAAAAAAAAAAAAAAAAAAAAAAAAAAAAAAAAAAAAAAAAAAAAAAAAAAAAAAAAAAAAAAAAAAAAAAAAA	Site58	12	WBGene00004425	rpl-13	C32E8.2	rpl-13 encodes a large ribosomal subunit L13 protein.	Ribosomal Protein, Large subunit
I	3788886	3788887	9a87e20f-da68-4781-ac07-02e78d1b10cb	640	826	+	ACTTGTTATGAAAGTTAAATTCCCCACTCCCCCATCTACCCACTCCCCATATCATCATCCATTCATCCACCTACCATCCAAATAAAACCGCCTATAATGGCTCCAACAAAGAAAGTGCCACAGGTTCCAGAAACTGTGCTCAAGCGCAGAAAGCAGAGAGCCGATGCCCGTCAGGCTGCTCAACAAGGTGACCGTCGCCGCTTAGAACAAGGAGAGAGAAGAAGACCCAATACAAGCGTGCTGAGAATACGTCCAGGAGTACAGAACGCCCAAAGGAAGGAACAGACTCAAGCGCGAGGCTGAGGCCTGGGAGACTTACGCTTCCGGTTGAGCACAAGGTCGCCTTCGTCGTCAGAATTCGCGGTATCAACCAGCTTCATCACTACAAGCCAAGAAAGG…	Site58	12	WBGene00004425	rpl-13	C32E8.2	rpl-13 encodes a large ribosomal subunit L13 protein.	Ribosomal Protein, Large subunit
I	3788886	3788887	755703e9-d8cb-41e8-90fc-a2864ef1d9d8	629	119	+	ACTTGTTATGAAAAAAAAAATACCCTCCCAACCTCTATCATATTCTCATATTAACATCAACCAACCCACCATCCATTCCTATTTCCTCTAATAAAAAAAAAAAAAAAAAAAAAAAAAAA	Site58	12	WBGene00004425	rpl-13	C32E8.2	rpl-13 encodes a large ribosomal subunit L13 protein.	Ribosomal Protein, Large subunit
I	3788886	3788887	9a48f659-d640-4d01-aff9-b30899c6ccee	665	151	+	ACTTGTTATGAAAGTTAAAAAAAAAAAAAAAAAAAAAAAAAAAAACACCCCTACCCAACCATACATTCCCACCATACATTATATTCCAACAACCTCATCCAACCCATCCCTACCATCCCTCAAAAAAAAAAAAAAAAAAAAAAAAAAAAAA	Site58	12	WBGene00004425	rpl-13	C32E8.2	rpl-13 encodes a large ribosomal subunit L13 protein.	Ribosomal Protein, Large subunit
I	3788890	3788891	4604f677-c158-4707-8406-0e2bf3cb450d	640	100	+	GTTATGAAATCCCATCCCATCCCACCTATCATCATCCTCATATCAACGCCCCTACACCCAAAATAACAAAAAAAAAAAAAAAAAAAAAAAAAAAAAAAAA	Site58	12	WBGene00004425	rpl-13	C32E8.2	rpl-13 encodes a large ribosomal subunit L13 protein.	Ribosomal Protein, Large subunit
I	3788892	3788893	f795c6f8-8c8e-4fd2-8829-f6d3e8cc6a08	646	114	+	TATGAAAGTTAAATCCCTACCCCACCATTCATCATCCATCCATAACCTACAACACCCAAAAAAAAAAAAAAAAAAAAAAAAAAAAAAAAAAAAAAAAAAAAAAAAAAAAAAAAA	Site58	12	WBGene00004425	rpl-13	C32E8.2	rpl-13 encodes a large ribosomal subunit L13 protein.	Ribosomal Protein, Large subunit
I	3788892	3788893	bc84c800-94d1-4fc2-92c8-85516badaf11	651	110	+	TATGAAAGTTAAAATCCCTCCATCATCATCCCAACATCATACCTTATCCATCATCCCCGCCCATCCCCTACCAACACCTACGTAAAAAAAAAAAAAAAAAAAAAAAAAAA	Site58	12	WBGene00004425	rpl-13	C32E8.2	rpl-13 encodes a large ribosomal subunit L13 protein.	Ribosomal Protein, Large subunit
I	3788892	3788893	c989793c-3123-4fcb-be1f-ad42fb1f5ebb	626	118	+	TATGAAAGTTAAATTCCCATCCCATCCCATCGCTCAACAACCGCCCATCCCATCCTAAAAAAAAAAAAAAAAAAAAAAAAAAAAAAAAAAAAAAAAAAAAAAAAAAAAAAAAAAAAAA	Site58	12	WBGene00004425	rpl-13	C32E8.2	rpl-13 encodes a large ribosomal subunit L13 protein.	Ribosomal Protein, Large subunit
I	3788892	3788893	4f01ddd2-8d79-4d67-8e42-b5d33ad812b6	648	130	+	TATGAAAGTTAAATTCCCATCCCGTTTATTTATCAACCCGCCCATCCCGTTCCCAAAAAAAAAAAAAAAAAAAAAAAAAAAAAAAAAAAAAAAAAAAAAAAAAAAAAAAAAAAAAAAAAAAAAAAAAAAA	Site58	12	WBGene00004425	rpl-13	C32E8.2	rpl-13 encodes a large ribosomal subunit L13 protein.	Ribosomal Protein, Large subunit
I	3788892	3788893	104511c6-be73-4e73-9ead-faffb6c5b927	615	109	+	TATGAAAGTTAATTCCCTCCATCCCTTATTTATCTCAACCATCGCCCATCTATCAATCAAAAAAAAAAAAAAAAAAAAAAAAAAAAAAAAAAAAAAAAAAAAAAAAAAA	Site58	12	WBGene00004425	rpl-13	C32E8.2	rpl-13 encodes a large ribosomal subunit L13 protein.	Ribosomal Protein, Large subunit
I	3831396	3831397	3637b90b-c6cc-494e-807c-f9ebbdf59659	210	968	+	TCAACTTCGCGCCAGACCAATCCATTCGACAAGAACGTGGCCACCTTGGGATCAGATCAAGCAAAGACGTCAACTCGCTCAATATCACCCTCGTTCTGCTGTAGTCTGACTCTCTTTAACCTTTCTTCATTTCTATTTTAATTAGCCAAGAAGTCGTACGAGCAAGTAATTTAATAGATCATCCGTTTCGTCCCGTTTCCAGTTCACCGTTAAATTATTCGGCTCTTGTGACCCATCATTCCTGCCACCCTGGTCCGTTCAGGTCCGGATGACGACCATGGGATTTCGCGAAAGAGTTCGTTTGCGTCACCAACATCGTTCATCCCGTAACTAATCGAAATCGATATAGCTGATGGTGACCTTCGCCTCGTTCTACCTAACCAGCTGTTGAGCCGGAAT…	Site60	6	WBGene00018764	F53F10.2	F53F10.2	none available	not known
I	3831427	3831428	c7876478-26f9-4b3f-bf44-a2f4e7552eff	292	375	+	AAGAACGCCGAGCACTCATTAAGGGATCCTCAGATCCGAAAGCCCTGAGATGTCAATCTCAATTCGTCACCCGTTCTGCTGTAAGTCTGACTCATCTATATTTCAATCCGGTATGAGCGCATTAATAGACCGCTTATCCCGATTCTGGTTTTCGTAATTAAATTTGACAGTGATCTCATCATTCTGTTCAGCACTGCTGAGTTCGGATGTTTTCTGTGAGATCTTTCGTGAAGTTCGTTACTCGTGTTTCCAACATTCTGTCATCCCGCACCAACACTGGTCTACTTCATTATTCCCCATTAATTACAACAATTTGATAATATAGTATGGTGCAGACACCGTCCATGTACACACTACCCATATAACTTCCCGAAT	Site60	6	WBGene00018764	F53F10.2	F53F10.2	none available	not known
I	3831427	3831428	ab460013-7fb0-4e4f-ba1a-604db2f8453e	275	404	+	AAGAACGCATGGCTCGTGGATATCCAGATCCGAAAGCCTAGTCCGTTAACTCTGTTTCTCAATTCGTTTCCTATCCTCTATTGTAGTCATCGACTACATACATCTATAACCTCTTCATTCATCAATATACCGCAGAACTGATCGTGCATGGCAAGTAACTCAATAGACCGCTCAATCACATATCCCTATCTTCCCTGGTTCACCATCAATTATTCTAAAATTTCATAGGTGACCTCATTCTTACTTCCATACCTCAGCCTATACATGTTCCATCAGACGACGTTCTTGGATTCATCGTGAAGAGCTTATATCTTCCAACATCGCTTCTCCCGCGCCAACTTGGCTTACTTTATCTCCCATTATTAACAAATTGACTAAATTAGTATGGTGAACCTTTGC…	Site60	6	WBGene00018764	F53F10.2	F53F10.2	none available	not known
I	3831448	3831449	473f3364-1bb5-4175-8b30-a6e009fc4d46	300	398	+	GATCCAGAGATTTACCGAAAAGCACGAGTCCATTCTGTCCTTTCTTATTCCTATCTCTGCCGACTGACTCGACACCTTTCTCTCTATTACTCACACTTTACTCTTATTTTAATATCCAGAAAAGTGCGACGGCCGATCGCTAGACCGCCACCACCGTTGCCCGTATTTTCCTGTTTTCCGTCAATTATCATTATCAACTAAATTCCGTCAAGGCGGCACCATCCTTCATCCTATCCCTCAGCCTGCACTGTTCCAAGACGACGATTTCGTGATTCTATGAAGGCAGAGCTCGTATGCTACCAACAACTTGTCTCCATCCCATACCATTAACTTATACCAATTTCCCCTAAACAACAATTGGCTTAAAATATAGTCAGTGAGACCTCACCGTCATCCAT	Site60	6	WBGene00018764	F53F10.2	F53F10.2	none available	not known
I	3831448	3831449	1a654b17-21a6-4bd2-9b86-d6fd1407a069	283	414	+	GATCCAGATACCGAAGCCTGGACGTCATTCAATCTTAATACTTATTTCCCTGTTCTATTGGTGGTCTTGACTACACACTTCTATCTTTACTCTTCATCTTTTAAATTGCCAAGTGGTATACGCGGCAAGTATTTATTGCAGTTTTGCCGCATCACTCGTCCCGTTACCACCAGCTTCCGTTCAATTATTTAAATTTTGACAGGCTGACCTCATTCATTCCTCTGCTTCCGGTCCGAACCTTGTCCATGGATGATGCTTTGGGATTCTATGGCAGAGCTTGCATATAATTTCCTCAACATTGTTCATCCCATCTATAACTTCCTGTTACTTTGGCTTCCCCAACTTCAACAATTGTTAGCTGATGACTGACCTCGCCTTCCTCTGCATACTTAACCAACC…	Site60	6	WBGene00018764	F53F10.2	F53F10.2	none available	not known
I	3831448	3831449	b91fa9f9-d2ae-44e5-8e45-a8d711127e35	308	394	+	GATCCAGATCCGAGCCAGCCAGCAAGACACATCATTGTTTGTTTGTTTCCCTGCTTGCCGGTTGACCGAGCTGACTCTATAACCTTTTTTATTTTTATTAATTTTTAAACTCGAACGCCAAGATTGGTGGTGTACGAGCCGGTGCTAATAGTTTATCCGTTTTCGCCCGTTTTTTTTTCCTGTTATCTGGGTCTGTTTATTAAATTTAAATTTTCGACGGAGTGGTCCACTTATTTCTTATTCCTTATAATACCCATCAAATCCCTTGTTTTATTAGCCTTCAGACAGACGACGTTAGATTTCGTAGAGACTTATACATCGTGTTCCAACAACCGGCTTCGCCCGCCATAAACTTGGCACAATTTCCCCATTAAACAACAAATTATGGATAAAT	Site60	6	WBGene00018764	F53F10.2	F53F10.2	none available	not known
I	4175339	4175340	e9188abd-4dec-4227-9a80-f831af1f5a73	29	640	+	AGACGGAGATGTGGCGACCGATAAAAAGCTGAAAGTATGAATTTAAACAAAAGGGCTGGAGCCATTGCCTTGGAATATACAGCATAAACCTACCTATTATTGGGTGACCGTCACAACCATTGGTTTTGAAGGGAGTGTTGATTTAATTGTGTCAGCAAAACTGGTCGTGGAATGTTGTATGGAGTCCACTTGGGGTACCGAAAAGGACAAAAAAAACTGGATAACTGGGAAACAGTTTGCTGCTCGTTAGTATGAAGATGACCGGGAATAAAAGTACTCGATTTCCATTGTCTCCTGGTTATTCAAAGGGGAGAAATATGACTATGGAATCGATTCTACAAGGTTGCTATCAAGGAAAAATCAACTTGCAAGTAAGTATATACGGGTCCAAATATTTTA…	Site61	16	WBGene00004464	rpn-8	R12E2.3	none available	proteasome Regulatory Particle, Non-ATPase-like
I	4175344	4175345	6ff76104-a728-4e25-b1a4-19e0364ee567	33	499	+	GAGATGTGGCGACTGTTTGAGCTGAGATGTTACCAAACAAAGAAAGTAGCCTACACTATTGCTCTTGGAAATGTCTATAAACCTTCCCGTATTAATAAGGTAAATGCGTCCATCTGATTTTAAAGTGTATGCTGACATTTCAATCAATGCAATTACCTGTCGAAGCGACTGTTGGAGTTCAGCCACCGAAAGGGACATCAAACTCTGATTGGAAAACAGTTTTACTTGCTGCTCCGCCGTCGATGAAGATGACGGATCAAAGTCTTAGTCACCTCGACAGTATTTGGAGAGCTGTTATAGGGCAATGCTTACCAGAATTCGCCAAGGAAAAATCGCTACGGATGGTTATTATACGGGTCCAAAACTCTTCGAGAACAGGTTAATCATTCAACGAAAATT…	Site61	16	WBGene00004464	rpn-8	R12E2.3	none available	proteasome Regulatory Particle, Non-ATPase-like
I	4175344	4175345	f32448cf-8fda-4d90-9702-5c3d203fbea6	45	511	+	GAGATGTGGCGACTGTTCTGGGTAAGATGAATGTTCTAACTGGGCTGAAGCCTCTACTGCTCCTTGGAATATGTCATGCAATTCCCGTTAATCAAGGTGACCGTCCATCTAACTGGTTTCAAGAGGCAATGATCATTCTTAATCGTGTCAGCAAAACTCAAAGCGAAGCGTGTAAGAGTCCTTTGGGGTCCACCGAAAAAGGACAAAACAAGTTGGAAAACAGTTCTGCTGTTCCATCCATCTGATGAAGATGTACAAGGATAAAAGATCTGGTTCCGTACTGGACTATCAAAGAGCTACGCTAGAAGCCGTCACAAGGTTGCCGCCAAGGAAAATCGGCAAGACCGGTAACAACGGGTCCAATTACAGAATACTGCTATCAACGCAGGTAATATCGAA…	Site61	16	WBGene00004464	rpn-8	R12E2.3	none available	proteasome Regulatory Particle, Non-ATPase-like
I	4175347	4175348	a1eef80d-c527-4cca-9568-9fdbd5051312	47	361	+	ATGTGGCGACACTGTTCAGCTTAAGATGTCACCTTATTATTCCGAATGGAAGCCTTCACTGCCTGGAAAATGTCACCCGCAATTCCCAAACATTGCCAAAGGTGACCGTCCAACCACCTTGGTTCCTCTGAAGTGTTGTTGATCTCAATCGTCACAATTCAGTGCACTAATGGAGTCCTTGGGTACCGAATACAAAACTCGGGATACCATCTGAGGCAGTTTTGTCGATTCTGATGAAGATGACACAAGAGTAAAGTACTGTTCCTTGTATGGACTATTTAAAGAGCATGTATGGAAACGATACAAGGTATGCCAAGGAAAAATCGCATGGATGGTATCATACGGGTCCAAAACTCTCAAG	Site61	16	WBGene00004464	rpn-8	R12E2.3	none available	proteasome Regulatory Particle, Non-ATPase-like
I	4175347	4175348	d95854e1-7335-4011-8d55-e4668cfd6659	43	381	+	ATGTGGCGACTGTCAAAGCTGTAGATGCACATCAAACAAAAAGGCTGGAGCCCATTGCCACTTGGAATACATGCCACCCGTTGCAAAGTGTCTCCGTCCACTCCATCGGTCTCAAGTGTTGTTGATACTTTCAATCGCGACAAGCAAACCTGGCGTGAAGCGTGTTGTTGGAGTCCTGGGTCCAAAGGTACCCGCCCAAATCAACGGTACTGGAAACAGACCTACCCTGCATTGTTCCGTTTGATGAAGATGACCAAGATAAAGTACTGGTCCACCGACACAAGACTATACAAAGGGAGTGGACCGTATGGGCGTACCCAGGTCGTCAAGGAAAAAATCAATGGAGTAGATAAGTATCATACGGGTCCAATTATTCACAAG	Site61	16	WBGene00004464	rpn-8	R12E2.3	none available	proteasome Regulatory Particle, Non-ATPase-like
I	4175347	4175348	9259e66a-6803-4f04-94cc-77d91b6c9366	39	372	+	ATGTGGCGACTGTCAAGCAATAGATGTCACCAATCGAAAAGGCTGGAAGCCATCGATCCTTGGAATTGTTCGCAATTACCCACGCTAATTGGTGACCGCCACATCCATTAGCCTTTGAGTAGCTGCTGATTTACTCAATACGTGTCAGCAAACCTTAAGCTGAAGCGTAATTCGTTAGACCTTTGGGGGCAAGGACCAAAACCTCTGAAGTCTTGGAATGGTTTGTTTCCACATCTGATGAAGATGACGAGGATAAAAGAGTCATGGTTCCTTGTTTTGACAACTTGAGAGCTCGTATGGAATGTTTACAAGGTTGCTCGCCAAATCTATTGTTGGCGGATGGTATTATACAGGGTCCAAACTTCTATGAAG	Site61	16	WBGene00004464	rpn-8	R12E2.3	none available	proteasome Regulatory Particle, Non-ATPase-like
I	4175347	4175348	baf1e8e3-9158-45ed-bfca-81e949c1991b	42	402	+	ATGTGGCGGCATAAGGTCAAAGCTGTAGATGTCAAACAAAGGCTGGTAGCCCATGCCTTGGAAATGTTTATGCAATTCCCGCCAATCTAAAGGTGACATCGTCCACCATCCTATCAAGCACCTGGTATCGTTGATACTTTTTAATTGTCTGTAGCATAAACTCAGCGCAGCGCAGCCAATCCAAAGTTCTTGGGTCCACCGAAAAGGTACAAAACTTTGGATATTGGAAACAGTACATTGTGTGGTTCCGTCTGATGAAGATGACAAGGATCAAAAGTACTGGTTCCATGACACCGCTGGTAATCAGAAGAGCTCCGTGTATAGAATGTTTTCCCAGGTTGCCGCCAAGGAGCTGCAACAGATAAGCATCCATACAGGGGTCCAAAAAAAAAACCTTAC…	Site61	16	WBGene00004464	rpn-8	R12E2.3	none available	proteasome Regulatory Particle, Non-ATPase-like
I	4175351	4175352	b89892a9-a0ba-4bae-9e91-57f1a5117e6b	43	756	+	GGCGACTGTTGCGGGTTTTGCAGATGTTACCATTAAACTACAAAAGAGCAATAGAGCCTCAACAACTGGCACCTTTCGGAAATGGCTCATGCAAACCCTTCCCCTGCAATAGGAGCGCCTCATCATTCCTAATGGTTCTGAGTTGACTGCTGATCATCACCAATCGTGTCAGCATAAACTCAAAGCGCCGACAATTGGTACCTTTGGGTCTCCATGAAAAGGAGACAAAAAAAAACTTGGATATTGGAAAACAGAGTCTGCTGGTTACCGGTTATTGATGAGATGACAAGGATAAAGAGTCTCTGGTTCCACCGACTACAGACTAATATGGGAGAGAGCATGCGAATGCTTTACAAGGTTGCCATGCCAAGGAAAAATCGCATGGATGGTATCATTCAG…	Site61	16	WBGene00004464	rpn-8	R12E2.3	none available	proteasome Regulatory Particle, Non-ATPase-like
I	4175351	4175352	fc31c6da-99bb-4890-aaf7-dfa2b4b9c0fb	47	374	+	GGCGACTGCTCAAGCTGCAGATGTATTACCAAACAAAAGGTTGGAGCCCAACATTGCCTTGGAATAACGACCATGCAAACCTTCCGTTGCAAGGGTGACCATCCATACAACTGTTCTTGGTGTTGTTGATCATCACTCAATCTCGTGTCGGGACAAAACTTGGTGTGAAGCGCAGCTGTCGATCCTTCTTTGGGGTCCGAAAAGGACAAACTTGATTGCCAACTTGGAAATAGTTCTTGCTGCTTCCACCGCTAAGGCCAAGATGACAAGGTTTCGGTTCACCGCTTTGGATTAAGAGGAGAGTCGAACATGGAATGTTCTCAGGCTGCCATCCAAGGAAAATCGTCAGACGATAACAGGGTCCAAACTTTCGG	Site61	16	WBGene00004464	rpn-8	R12E2.3	none available	proteasome Regulatory Particle, Non-ATPase-like
I	4175351	4175352	39dab5b5-fd41-4312-b40c-51b7b9f4d2f9	26	307	+	GGCGACTGCACAAAGCTCGCAGATGTCCGCTAAAGGCGAGCCCTTGCCCTGGAAATGTTCCGCAAACCTCCCCGTTAGCCGAATGTGTTGTTGATCTACTCAAACACCGCTGGCACTGTTGTGGAGTCAAAGGGCACCGAAAAGACAAAACTAGTAACTGAAACAGTTTGCTGTTCCGCTAGTATGAAGATGACAAGAGGGATATAAAAGTACTGGTTTCCTCTCGACTCGAGGACTAACTTGAGAGCGTATGGAATGTTTTACAAGGTTATCGCCAAGGAAATCGTCGGATGACTATTACAAGATG	Site61	16	WBGene00004464	rpn-8	R12E2.3	none available	proteasome Regulatory Particle, Non-ATPase-like
I	4175377	4175378	8099adc2-16fa-4251-9d5e-9e7e0324aab9	69	481	+	TCAAACAACTCAAAAGGCTGGAAGCCCACATCGCCTTGGAAATCAATACCGCAAACTCCCTATTAAACGAGGTGTACCGTTCCACTTAAAGGCTCTCAAAGTGTTGTGACACTTCTTAATTCGTGTCAGCAATTCAAGCGTGAAGCGTGTTGTTGGAGTCCTTTAAGGTCCACCGAAAAGGTACAAAACTCGAGTACTGGAAACAGTTCTATAATCCGTCTGATGAAGATGACAGGATAAAGTACACTGGTATCCACGACTTCTGGACTATCAAAGAAAATACCGTATAAGAATGTTTACAAGGTTGCCGCCAAGGAAAATCGACAGTCGGTATATCATACAGGTCCAATTTTCGAGAACGATAATCATTATCAGGCAATTGAAAACGATTTGCCCGAA…	Site61	16	WBGene00004464	rpn-8	R12E2.3	none available	proteasome Regulatory Particle, Non-ATPase-like
I	4175401	4175402	db9808f6-ef08-4c7c-8880-5639d57c2ae5	93	282	+	ATTGCCTTGGAAATGCTTTGCAAAACCCAAAGGCGACCGCACATCCGCTGGTCTTCTGGTGTTGCTGATCATCAATCGTCGGTAAACTCTGGTGAAGCTGGTGTTGACCACTTTGGGGTCCGAAAAGGACAAAATTAAGAACATTGGAAACAGTTCTGCTGACCAATTTGACGAAGATGGTATGGGATTGTTTCGGTTCCGACTCGGTATCAAGGCTGTCGGAATGTTCTACAAGGTTGCGCCAAGAAAAATAATCAGTTGACATACGGGTCCAATTACAAG	Site61	16	WBGene00004464	rpn-8	R12E2.3	none available	proteasome Regulatory Particle, Non-ATPase-like
I	4175407	4175408	2dcbfcd0-0518-4133-bd44-af4f78977b01	90	326	+	TTGGAAATGTTCATGTAAACCTATTGCTAAAGCGACCGACCATCACCCATTGGTTTCTGTTGTTGATCATTTCAATCGTCGATAAACTTCAAAGCGTGAAGCGTGGCTGCTGGAGACCTTTGGGGCACCGAAAAGGACAAAACCAAGACTGAAACAGTTCTGCTGTTCCGCTACTGATGAGATGACAAGGATTGGTACCGATACCGACATAAGCAATCAAAGGCATGTATTGAATGACACTTACAAGGATGCCGCAAGAAAATCGGCCGGACGAGCATCACACAACACCAAGCCCTAAACACGAGAACGGGCTGGCATTATGAAAA	Site61	16	WBGene00004464	rpn-8	R12E2.3	none available	proteasome Regulatory Particle, Non-ATPase-like
I	4175407	4175408	3f48b1ce-0fe6-420b-9ea1-42136e1e5a48	109	270	+	TTGGAAATGTCATGCAAACCTTATAAGGTGGTCGTCCACACATCCATGGTTCTTAGTGTTGTGATATTCAACCTTTAAATAATAAATAAAATAATATGTCAGCAAACTCTAAGCTGGGCGCGTAAGTCCTTAGGTCCACTGATTAAAAGCTCAAACTATGGATATTGGAACAGTTTCTGTTGCTCCGTTTGGACGAAGATGACACGAGGATAAAGTCTTCGGTTCACCGAACCGTATTTAAGGAAGAGCATGCAAGAATGTCACATCAAG	Site61	16	WBGene00004464	rpn-8	R12E2.3	none available	proteasome Regulatory Particle, Non-ATPase-like
I	4175410	4175411	564eaefc-f34c-45b7-b4f6-e8b631246d7b	106	330	+	GAAATGTTCTGCAAACCCTTCCCTGCTAAATCAGGTGGTACGCCAACACCAACTGTTTTAAGTGTATTGCTGATCATTTCAATCGTGTTGGCAAACTCTTGGCGTAGCGCAGCTGCTGGTCTTGGCACCGAAAAAGGACACAAATTACTTGGATATTAGAAACAGTTTGCTGTTCCTGTTTGATGAAGATGGAACGCCAGGATCGAGTACTACAGTTCCTCCGACTTGACTATTCATCGAGGGAGAGCGTATAGAAATGTTTACAAGGTTGCCGCCAAGCAGGAAAAATCGTTGGATAAGTATCATACGGGTCCAACAAATCACCACAAG	Site61	16	WBGene00004464	rpn-8	R12E2.3	none available	proteasome Regulatory Particle, Non-ATPase-like
I	4175411	4175412	bfd27cd4-bfe9-4d83-bb30-93d0064065da	106	335	+	AAATGTTCATGCAATTCCTTCCCTATATTGCTAAGGTGACGCTCCATCTCATTGATCTCTAAAGGCGTGGCAATGATACTCAATATCGTTGTGTGGTAAATCAAGCGAAGAAGCGTGTTGTTGAAGTCCTTTAAGGTCCACCGAAAAAAAGGGTACAAAAAAACTTGGATATTGGAAACAGAGTCTTCTGCTAATCCGTTGTCCAAGATGACGAGAATAAAAGTCTTTGGATCCTTCGACTGGATAACTTGGGAGAGCTACCGTAAGAATGTCTACACAAGGTTGCCATCCAAGAAAATCGTCGAGACGGTATCATACGGGTCCAAACTTTCAAG	Site61	16	WBGene00004464	rpn-8	R12E2.3	none available	proteasome Regulatory Particle, Non-ATPase-like
I	4229582	4229583	034e764d-d7a2-400d-8af6-51e04f6c58ba	19	300	+	AGACGTCGCAAGGACAACAACAACCAGCTGAGTGGGCCAGTGCGCATCGTGCCTTATTGTAGTTCCACAAATAATAATGACTGTGTGCGAGACGCTGCACTAAAATCAATACCGCTAAATGAGATGAGTCATCGGCTCAAGCTGTTAGCTAGACGCAGAGCTTGACTACAAAGGCTTCTTGAGCTTAGAGAGACAGCGAGACGCCACTACAACACTCTACTACTCACCACGTTTTCATACTCACCTCATTCCCTAAAACCTTCCATTTTAAACCGTCCGCCGAGTCTGGCGATGTCACAG	Site62	5	WBGene00003516	nab-1	C43E11.6	nab-1 encodes a PDZ and SAM domain-containing protein that Concise description: nab-1 encodes a PDZ and SAM domain-containing protein that is the sole C. elegans ortholog of the mammalian Neurabin/Spinophilin proteins; by homology, NAB-1 is predicted to interact with F-actin, ZYG-8/Doublecortin and the SAD-1 serine/threonine kinase to regulate interactions between the actin and microtubule networ…	NeurABin
I	4229589	4229590	cb0cf5c7-6b36-4057-bfea-3912ad996845	29	267	+	GCCGGGACAACATTGCTGCTGCGGGAACTGGGCGGTCGCATGCGCGCCGCGCGCACATATCGACATCATAAATGGTCGATGAGACGCTGCCAAATCGTCCTTAATGATGACTCTGCGGTCACGAGCTGCTGGCAAGACGACGCAGAGCTGTTACAAAGGCTTCTTTGAGCAGCTAAAGAGACAGCGAGACGCATCCATTACCACCGTTTCATGCACTTTCCACTACCCCAATTCCTCCACTTTATGTCCGCGAGTCCTGTCCGTCAG	Site62	5	WBGene00003516	nab-1	C43E11.6	nab-1 encodes a PDZ and SAM domain-containing protein that Concise description: nab-1 encodes a PDZ and SAM domain-containing protein that is the sole C. elegans ortholog of the mammalian Neurabin/Spinophilin proteins; by homology, NAB-1 is predicted to interact with F-actin, ZYG-8/Doublecortin and the SAD-1 serine/threonine kinase to regulate interactions between the actin and microtubule networ…	NeurABin
I	4229589	4229590	ba9c271a-aa89-42dd-a125-90697a7c55de	21	358	+	GCCGGGACATACTTTATAGCTGGTGGCAGCGACCGCGTCGTGCGTCCACCGCTGTGATATAAATAGTGCGAGACGCTGCACAAAAACATAATCCGCATTGCATAGATGATTACAGCTTCCTAGCTGCTGTCAGACGATGCGAGAGCTTGTTACATCAAAGGCTTCTTTAAGCGGCTTGAGAGTACAGCTGACGCATCCATTCTTACTTCCACGTTTTAACGTCATCACTTCCTCCTCATTACCCTCAATTCCATTTAATGTATCCATGAGTCCGACGCACACACGGTCGAACGAAATTACTAAGTTCTGGCCATGGATTCTGTACTGGATCCAATCGTTATCGTAAGGTTTATTCAAA	Site62	5	WBGene00003516	nab-1	C43E11.6	nab-1 encodes a PDZ and SAM domain-containing protein that Concise description: nab-1 encodes a PDZ and SAM domain-containing protein that is the sole C. elegans ortholog of the mammalian Neurabin/Spinophilin proteins; by homology, NAB-1 is predicted to interact with F-actin, ZYG-8/Doublecortin and the SAD-1 serine/threonine kinase to regulate interactions between the actin and microtubule networ…	NeurABin
I	4229589	4229590	785d0fb9-5c92-49b9-ab57-7279a34dd5b9	20	391	+	GCCGGGACAACAACAGCTGGTGACTGGGGCGGTGCGGCATACGCGCATCGTGCCACCGCTGAATCGATCAACAAAACTGTGCGCAAAGACCATTGCCACTATTCAATCCAACTAATCGTGAGATGAACCGAAAATACCCGAGCTGCTGCAAGACGACGCAGAGCTCGATTCATCAAGGCTCATTAGCAGCACTGGGAGGACAGCTGATGTCACTCATTTACTCTTCCGTCTTCAACACGTCATTCTTCACCTTACCATTCCCCCACCTGATTCCTCCATTTCTGCGTCCTCGCGAGTCCTGCGTCACAGGTCGAACGAAATTCTGATTTGTTAGGTTTTGGTTAGATCCAATCATTATCAATCGGCAACGAAGGTCTATCTATACAAATAA	Site62	5	WBGene00003516	nab-1	C43E11.6	nab-1 encodes a PDZ and SAM domain-containing protein that Concise description: nab-1 encodes a PDZ and SAM domain-containing protein that is the sole C. elegans ortholog of the mammalian Neurabin/Spinophilin proteins; by homology, NAB-1 is predicted to interact with F-actin, ZYG-8/Doublecortin and the SAD-1 serine/threonine kinase to regulate interactions between the actin and microtubule networ…	NeurABin
I	4229632	4229633	da6be6b9-f01b-428b-971a-c93a95ef8955	58	220	+	CGCACCGCTGCTGACATAAATGGTGAGACGCTGCCTAATTTGCCAGCTAGTACGGGTACGTTCCGAGCTGTTGTTAGATGTCCAAGAGCTCGATTTTCACAAAGGCTTTTGAAAATAGCTGGGACGATGCTGACGTTCCATTTACTTCCACGTTTTATACTCCTTCCATCCATTTACCAAATCCACCATCATCACGATGATGCTTGGATCCGATGCACCG	Site62	5	WBGene00003516	nab-1	C43E11.6	nab-1 encodes a PDZ and SAM domain-containing protein that Concise description: nab-1 encodes a PDZ and SAM domain-containing protein that is the sole C. elegans ortholog of the mammalian Neurabin/Spinophilin proteins; by homology, NAB-1 is predicted to interact with F-actin, ZYG-8/Doublecortin and the SAD-1 serine/threonine kinase to regulate interactions between the actin and microtubule networ…	NeurABin
I	4303944	4303945	38c911eb-a6c5-4a3e-9ccc-c5c1caa29318	20	732	+	ACAGTGACTCCGGTTTCAATAAGAAACGCGTTTTATTCCATCACCGCTCACAGCTGGTTGTTCTGTCGAGGCCTTAAAGGATCTATTCCGCCTTTATCTTTTCACTGCCAAACACATCTCCCTGCTGGCGTTTCCATAATTAGCATCTACTGATCATTTGTTCAATTATCCATAGCCTATCTAGATCCTCTAGTTTTCCATTTGTCCGTTTTCTGATTTTTTTAACTATTAGCGGACATTTTCATCATACCTCAACGTGCTGCAAGTATAGCATGGAACCTAATCCACTACGGTATCATGTGGCCACTCGTTTCGTTCAAAACTAATATACATGCTAGTGATCCAGAACGCAGTTCTATCTCAACAACGTGATGTTGTGGTGATCTCCTCAAATACTGA…	Site63	5	WBGene00021628	Y47D9A.1	Y47D9A.1	none available	not known
I	4303944	4303945	811580ee-61b3-4d0b-8062-03ba4ae11d2a	27	347	+	ACAGTGACCTAGACACCAGAAACGCGTCTTTCGTTTCCACTTACACACCAAATCCGTCCTTCAAGCTGATCATGGTCGGAGGCCTCAAAAGGTACCTATCCTCGTCCTATCTTCTTCATATCCAAACACACCCAGCTGCCGGCGTCCTTAAAACCGAGCATTTACTGATCAACCACTGTTATAATTATCCGGCCTATCAAGATATCCTTACTTAATAGACTTTTTCCCATATGCACGTCAGTTTTATCGGTCGCTGCCAACAAAACCCACCGTCAGTATTAAATATCTTTTGAGGAGGAACCAAAATCACATCAAGACTATCGGTGGCCTTCGTTACCATCCTATTC	Site63	5	WBGene00021628	Y47D9A.1	Y47D9A.1	none available	not known
I	4303952	4303953	3e5ea0f0-1665-4adb-a913-7e100e3d49cf	26	594	+	CCGGTTCCACGAATAGAAAACGCCGTCTTCGTTTCCTCTACCACCAAATGTCCTTTCAAAGCTGTCGTTTAGTCGGAGGCCCCTTTTGGGTACCTATCTTCCGTCCATCTTTATTGCCAAACATCCACTTCCCAATTAATCGGCGTTCCATTAATCGGCAACATCACTGAACATCAACTTGTTAATTATCCGGCCTAACAAAGATCCTTTACTTAGTTTCCCATCCGACGTTTTCACTGATCATTAGTTATCGCCAATCCGTTACAGAACTATAAAATATTTTGAGGAACCTAATTCTACGGACTCGCAAGTGGCCACCGTTTCGTTCAATAAATTTCCAGCCCCGGATCCCAACCGCGTGTTACGCTTAACGACTTGTTACTGTGCGAACATTTTATA…	Site63	5	WBGene00021628	Y47D9A.1	Y47D9A.1	none available	not known
I	4304009	4304010	8ac2ae12-658e-43c7-9f49-f4ceb2c1ac91	92	711	+	TTCAAAGCGGTCGTTTAGTTCGGAGGCCCTCAAAGTTCCCTATCCATCCACATAACCGTCCGCTCCCAATTGCGGCGCTCAACTAATCGAGCATTTTACTGTTCTTATTTTGGCGTAATTATCCGGCGCCTATACATAAGATTTACTTAGACCTTCCCGCCGTCTTCCAGGCTTACCCTTCATTATGGTGTCTCGTTGCTCAACATCCTACCGTTTCAGTATTAAAAATATATCATCAGGTATCCTAATTCCACTCGGAACCGCGACTGGCCACCGTTTGTTAAATCAAATTCGTAAGTTGATCCGGATGTGGTTTGCATTATGCTGGTCTGACAATAAATGATTTTTTAAATTGAGGATTATGAAGGCACCGCCAAGAAGCATTGGACTTTTATTCAG…	Site63	5	WBGene00021628	Y47D9A.1	Y47D9A.1	none available	not known
I	4304010	4304011	d01aca4a-5f61-4883-aa36-91fbc29785ed	89	286	+	TCAAAGCGGTCGTTGGTTGGGGAGGCCTTAGATCACCCGCTTCCGTCCATTCTCCTTCAACTGCCAACTTCCCAATAACTGTTAGCGTTCCATTAAAACAGCAACATCACTGATTTTATTGTTAATTATACCTAGCCATTATCGTGAGTACCTTCTTTACTACTCGATTTTCCCATCTACCGATACCACCTTTAAGTACTACATAGTTAACCGCCTCAACAATCCCACACACCACCGCGTCACAGTTAATAAATATATATACCACATCGAGGAACCTAATCTCCAG	Site63	5	WBGene00021628	Y47D9A.1	Y47D9A.1	none available	not known
I	4526417	4526418	db48dfd1-e1e1-42ae-ba81-0b2b82b30be0	419	499	-	ATGCAGCCATCATTTGGTTTGACAGATGCAAAACACTGCCTTCGTCTTCAGATAGGCCACTTGCCCCGTATCTGACTCTTGATAATTCCGGTGGTCTATTGCCGTCTTCACCGAATGGCTTCTCCGTTGGTGGTTCTAGTCATGCCAACAGATGAGTGGTTACGACTCGGGGAGGAGTGCTCCAAGTAAATCCGGAAAGTGAGTATCAAGAGGTTCTGCTCCACCCTATTCTTTGATTTTGCAAACTTTGTGCTGCAATGGGTCTGCGGTTGTAAATGGTGCTGGTACTCTGGTGCCAGGAATTGGAGCCGATAATGAATTCGCGGTGGCGGCCGCATAAAGTTCACTTATTGCCGATATTCAAAGGAATGAAAGTGTACGTGTACTTGTACGACGGTG…	Site64	5	WBGene00022473	bet-1	Y119C1B.8	bet-1 encodes a BET-family protein that colocalizes with chromosomes; Concise description: bet-1 encodes a BET-family protein that colocalizes with chromosomes; Bet-family proteins are evolutionarily conserved, have two bromodomains, which recognize acetylated histone; BET-1 functions cell-autonomously; in bet-1 mutants, asymmetry of T-cell division is initially normal but later disrupted, BET-1 …	BET (two bromodomains) family protein
I	4526423	4526424	16bae3f3-ce06-46ee-99c2-a20651836fec	494	225	-	CCATCATTTCCGATTTAAGTTTATGTACAACGAGAAACACTGCCTTCGTCCACGGTATGGGCCCGCTTGCCCCGGTCGTCGCATCCTGATCCTTGTCTGCTCATCCTTCAACATTCGGGTTGCCTCCGTTAAGTCTAATCGAAATTTCGATGCGATATGTTGTAACGACCGGGAGGGAAAGATGCTCAGATGGTACTGGTAATGTGTATCGGTAATACTTTACCA	Site64	5	WBGene00022473	bet-1	Y119C1B.8	bet-1 encodes a BET-family protein that colocalizes with chromosomes; Concise description: bet-1 encodes a BET-family protein that colocalizes with chromosomes; Bet-family proteins are evolutionarily conserved, have two bromodomains, which recognize acetylated histone; BET-1 functions cell-autonomously; in bet-1 mutants, asymmetry of T-cell division is initially normal but later disrupted, BET-1 …	BET (two bromodomains) family protein
I	4526441	4526442	a08d1e53-c33f-4389-a73f-8fff2c1b74f0	456	479	-	TTGACAACGAATGTGACACTGCCTTCGTCTTCCAGGATGGCGGGCCTGCTTGCGCCTCCGCATCCGCATCCCTAAATCCTTGTCTCTGCTCATCCACTTCACCAGTTTCCGGAGTTGGTTTCTGTTAATGGTGGTAATCTTGTCGGTAGCATAAAGTGTAGACGAACTGGGGGAGGTGATGCTCCAGAGTACTCTGGTGAAGTAGTATCAAGAAAATACTCGCTCTACCCGTTTTCTTGAGATTTAACGGTGACTTGTGCTACGGGTCTTATTGGTAAGAGTGGACCGGTCTGGTGGAGCAGGATTGGAGGAGCTTGATGTGAATTCGATGGTGGCGGCTGCGTAGTAATCCACCAGCTGATACAAGTAAGGATGTTGATGTAGTACGGAGACTGATGT…	Site64	5	WBGene00022473	bet-1	Y119C1B.8	bet-1 encodes a BET-family protein that colocalizes with chromosomes; Concise description: bet-1 encodes a BET-family protein that colocalizes with chromosomes; Bet-family proteins are evolutionarily conserved, have two bromodomains, which recognize acetylated histone; BET-1 functions cell-autonomously; in bet-1 mutants, asymmetry of T-cell division is initially normal but later disrupted, BET-1 …	BET (two bromodomains) family protein
I	4526460	4526461	8d25f2e9-36b6-42f2-b8b0-ddd3e721dee4	503	256	-	TTCGTCTTCTTGATGGGGCCACCAGCCCCATCCGAACTCTGAATCCTTCCGTCATCTTCACCATTCCTAGGTTGGCTTCTGTTGAGAAGTTCTAGTTCGTAGCCAACGTTGTTGGTTACGAACTGGGAAGGGTGATGCTCCAAGTACTTGTGGTAGTAACTAATACTGCTCACCCGTTTTCTTAATTGAAACGGTGGTCCAGACCGCTGAGGTCTTGAGTAGTGGTGCTGGTGAACTTGGAACAGGTATTTGAGCT	Site64	5	WBGene00022473	bet-1	Y119C1B.8	bet-1 encodes a BET-family protein that colocalizes with chromosomes; Concise description: bet-1 encodes a BET-family protein that colocalizes with chromosomes; Bet-family proteins are evolutionarily conserved, have two bromodomains, which recognize acetylated histone; BET-1 functions cell-autonomously; in bet-1 mutants, asymmetry of T-cell division is initially normal but later disrupted, BET-1 …	BET (two bromodomains) family protein
I	4526460	4526461	60c86df2-ed34-4db8-b88e-1d07d9000564	518	139	-	TTCGTCTTCTTTAAACGGGCTCACCGCCGGCCTCCCGGATCTGCATCCTCTTGATCCTGATCCATTTCGTCTCTATCATTCCTAGGGTTGGCTTCCGTTGGTGATCCAGCGTAGCAGCGCGCGTTATGTTGGTTACGAC	Site64	5	WBGene00022473	bet-1	Y119C1B.8	bet-1 encodes a BET-family protein that colocalizes with chromosomes; Concise description: bet-1 encodes a BET-family protein that colocalizes with chromosomes; Bet-family proteins are evolutionarily conserved, have two bromodomains, which recognize acetylated histone; BET-1 functions cell-autonomously; in bet-1 mutants, asymmetry of T-cell division is initially normal but later disrupted, BET-1 …	BET (two bromodomains) family protein
I	4564106	4564107	8382f2a8-a61c-47e9-baa7-d53a8e341404	337	76	+	ATTTAATTAAAATCCCCACCCCATCCCACCATCATCCATCATTCATCCCTCCCCATCCCAAAATCCCAAGTTTGAG	Site65	5	WBGene00004113	pqn-24	D1007.14	The protein product of this gene is predicted to contain a Concise description: The protein product of this gene is predicted to contain a glutamine/asparagine (Q/N)-rich ('prion') domain, by the algorithm of Michelitsch	Prion-like-(Q/N-rich)-domain-bearing protein
I	4564143	4564144	aa985142-c678-4abe-9633-5ba677dc0845	30	300	+	TGAAACTTAATAACTGTCATCGGTTTGCAGTTGGTCTTTATTTTGACTTGTTAATAAAAACGTTGTTGGCGTCGTTTCAAAGGGGAGTGTAGGTGATCAAGAGGAGTGCCCGAAGTCATTCAACATTGCTATAATACGCTTTTATTCTGCTGCAGTTAGCTTCAATTTGTGAGGCTGGATGGGCAAGATGGCGGCAAGGCGGCGGCGGCGGCGGCGGCCGGCGCAATGCGGCGGGCGCCGGAGGTGTATGCTATCAGCAACTGGGACTTTACCGTTTCACATCCACCAATTGTTCCGGGT	Site65	5	WBGene00004113	pqn-24	D1007.14	The protein product of this gene is predicted to contain a Concise description: The protein product of this gene is predicted to contain a glutamine/asparagine (Q/N)-rich ('prion') domain, by the algorithm of Michelitsch	Prion-like-(Q/N-rich)-domain-bearing protein
I	4564147	4564148	e25658a6-f36b-480c-83c8-baefc0c90e2d	68	497	+	ACTTCTAATATTGACCGGTGCAGTAAGGACAATTCGCATCCGCTGACTTGGCAACAAATGGTGAAGTAAACGGCGTACAAAAGTGTAGGCAGGATAAAAGAGGAGTGCCCATGGTACATTGCTATAATATCTATTCTGCAATGGTACTAGTCAATTTGTGAAGGCTGGATGTCGAGTCAGGAGGTGTATGCTAAGCAAAAGGATGTCACTCCAAATTGTCCCAGTACGCGATCCAATGCAATGTGGTATGATTGATGTGCCGATGGTGGAAAACCCAATAACCTTGACAACCCGAAAACAAAACGCAGCTGGTGGTGGAAACAGAGTGGCGCTGAACGGAAGAAAACAATTGCAAGAAGCTGGCTGGAGGATCGTAAGGGAAATGAATGCTAATAATTA…	Site65	5	WBGene00004113	pqn-24	D1007.14	The protein product of this gene is predicted to contain a Concise description: The protein product of this gene is predicted to contain a glutamine/asparagine (Q/N)-rich ('prion') domain, by the algorithm of Michelitsch	Prion-like-(Q/N-rich)-domain-bearing protein
I	4564175	4564176	23eb700b-b8d8-4bed-9759-49cae8a12831	103	255	+	GGGACCGTTTATTCGCTGGATTTGTTATAAAGAAGTAAACGCATTGGGTGCAAAGTGTCGGCAGCGAAGTGAGACCAACAGAGGATGAGTCATCATTGCGACGTCTATACAGCTATAGTCGGCATTGTGAAGGCTGGATGCATGAGATGGAGGTGTGACGGCATAGCAACTAAAGTACGGTATTTAAGTCCCAGTCAGTTTGTGAAGCGATCGATGCAATGTGGTGGAAAAGGGCCTGTATATATATATATTCAG	Site65	5	WBGene00004113	pqn-24	D1007.14	The protein product of this gene is predicted to contain a Concise description: The protein product of this gene is predicted to contain a glutamine/asparagine (Q/N)-rich ('prion') domain, by the algorithm of Michelitsch	Prion-like-(Q/N-rich)-domain-bearing protein
I	4564175	4564176	d2571050-6d6d-4578-911a-7d5a4e77a26b	74	300	+	GGGACCGTCATATTTTGACTACTCGTTGTTATAGCGGAAGTAAAAACGCTGGCGCTTCTGAAGTGTGAGACAACAGAGAGGAGTACAAACCCAAGTACATTCAATAAATTACGTCACAACTCACATAATATAGCTTATAGCTTTAAAATTTTTCGTAAGAGGCTGGATGTCATGAGATGGAGGTGCAAGCTGGCATAAAGGATCACATGTATCACACAACACCAAAATAAGCGGTTCCCAGTCAGTTTTGTTGGTAGAGTATGGATCGATGCTGGGTGGAAACCCAAGCATTCTGACACT	Site65	5	WBGene00004113	pqn-24	D1007.14	The protein product of this gene is predicted to contain a Concise description: The protein product of this gene is predicted to contain a glutamine/asparagine (Q/N)-rich ('prion') domain, by the algorithm of Michelitsch	Prion-like-(Q/N-rich)-domain-bearing protein
I	4585138	4585139	437506dd-b642-4a8e-80a9-fd1f2ec6b850	34	136	+	CAATGAAGGTCGAAACCTGCAACCGGTACGACTGACGGAAAGGTCCAAATTTAAGAAAGGACAACTCTGAGAAGGCCAAGCCTCGCCGTAACCTCCACCCTGACCTCATGGATGGTCGTCCACCGAACACCGACCG	Site66	5	WBGene00004436	rpl-24.1	D1007.12	rpl-24.1 encodes a large ribosomal subunit L24 protein.	Ribosomal Protein, Large subunit
I	4585145	4585146	7072df8a-7856-4687-be4d-8fdbbc4722c4	46	185	+	GGTCGAAAACCTGCGTTTACTCGGATACAAGATTTACCAAGGTATGAAGAAAGACCACTGACGCATCTGCACGGGAAAAGCACCTCGGCTTTCCACTGTTGTAAAGCAGGCTCAGTGGCAAGCTCACAACGCTAACCCTTGACTTAGACAAGCTGCTCCACACATGGATCCGCTTGAACAAGGAA	Site66	5	WBGene00004436	rpl-24.1	D1007.12	rpl-24.1 encodes a large ribosomal subunit L24 protein.	Ribosomal Protein, Large subunit
I	4585184	4585185	fa96bd6b-1da3-4092-a20a-147feb25e656	76	154	+	AGGACACGGAAGGAGAGACTTAGCATGCTACTGACAGTGGTCACGATCTTCCGAGTGGAAAAGCCACTTCGGGTAGCAGGTGTTTCGTAACCCTTCGGACTCACAGATGGAGTTAAGCACACACTACACAGAATCACAAGAACAACAAGAAAGG	Site66	5	WBGene00004436	rpl-24.1	D1007.12	rpl-24.1 encodes a large ribosomal subunit L24 protein.	Ribosomal Protein, Large subunit
I	4585197	4585198	11dfb8da-e46f-4594-9d0b-8c7ae9a5fa18	73	137	+	AGACTTGTTTGACAGAAAGGTTTCCGGCTTCAGTGGAGTTAACCTGAGGCCTGGCTTTACCGCCGTAACCTTGACAACAGTATGTGGACTGGCACAGAATCTGAACGAGCTGACTCCCAAATACCAGCAGCGTGAGT	Site66	5	WBGene00004436	rpl-24.1	D1007.12	rpl-24.1 encodes a large ribosomal subunit L24 protein.	Ribosomal Protein, Large subunit
I	4585209	4585210	127c892f-0fad-46c2-bed6-c6cefdc9145f	117	127	+	ACTGACGGAAAGGTCCAAATTCACAGTGGAAAAGGCACTGGGGGGGGGGGGGGGGGGGGGGGGGGGGGGGGGGAGCCGGGTCTCGTAACCTCGACAGATGGACTGCCTACAGGAATCAGGAACAAGT	Site66	5	WBGene00004436	rpl-24.1	D1007.12	rpl-24.1 encodes a large ribosomal subunit L24 protein.	Ribosomal Protein, Large subunit
I	4599134	4599135	a1620583-78db-4035-81bb-1d1330c297b2	679	566	-	TCATCACGTCTATCATCACGGCGGTCGTCATCAACGGATCATCATCTCCCTAGCTCCCGTACCGTCTTGTCCACATTGGTTCAGTTCGGCAAAGGTATACTTCAGATCGATCACGAGTCTCCTCCATCTTCCTGCACCACCGCATCTCTCGTTGTTCATGCCTTCACGTTTGATTGTGTCTTGCATGAAGCGTACCTTACCAATTTCCTTGACGTTGTACTTCACTCATCTATCGAAAAGGACTTTACCGTAATCGGTCTACGATAGAATAAGGTAGCATAATGTTAACGTTACCACAAAGGTGTGGTGAGTTATCGACGAACCACTCTCGATGCAGAGACGCCAATAAATCCTTGTTAAACAACGGTGAAGCCATTTGGAATCGATCCATTATCACGT…	Site67	7	WBGene00017004	nrd-1	D1007.7	none available	NRD (yeast Nuclear pre-mRNA Down-regulation) homolog
I	4599155	4599156	9c5b7d6d-79fd-4f39-be52-6fc5f54bed97	748	540	-	CGGTCATCATCGACAGATCGCCATCCTTCAGACGGTGGCGTCCTCGGCTCCCAGATCACCGGTCCACGCATGTCAACAAGTGGATATGTCAGATCATGATCAAATGGTGTTTCCCATCTTTCCTGCACCACCGCCGCCGCGCATCTCTCTCGTTGTAGTTCACAATTCAAATTCGATTTAATCCAAGACGTCAGCATCCATTATTTCTTGGACGAGTTGAGGACCTCCACCACTCATCTATCAGTAGTAAGAGGACCACTGAGTCCTCTACGTTCTTCACTGAAGTTGAAGAGGCATAATAATGCATACCGCCAGAAGAGTGGTTGACTCAACGGTACCAGCTCTATGCCCAAAAGAAGACGGCTTACGTTAAAATCCTTGAGTTGAGAACAACAAGAA…	Site67	7	WBGene00017004	nrd-1	D1007.7	none available	NRD (yeast Nuclear pre-mRNA Down-regulation) homolog
I	4599163	4599164	493718bb-9461-47a6-a224-6f72d475b144	662	522	-	ATCACGACAGTGTTCCCGACATCCTTGCAAACATCCCAGCTCCCAATCATCTTGTCTATGCCACAATCAATTGAAGACAATCACGTATCATTGTTCCACGATAGTTCTTCTCCATCTTCCTGCACCGCCGCCGCACCATCTCTCGTTGTTCAACGTTTTCAACGGTTTTCCTAACAGCGATCACGAGCGTCGGACTTCTTCGGTCGAAGTTGGTGGACCTCTTCAGCCTTATCATTCAATAAAATGTAAGGTGGTGGAGGACCAGTCGTGTTCTCTACATCCACCACGGTGATAAATGGTGGCATATAGTTATCGCATAACCTTGCCATGGGAATGAGCTCATTGCGGTGCTGCTCTACGGCTTCCCAAGAAGAAGACAATAGTAATCCTTGAGTTAGG…	Site67	7	WBGene00017004	nrd-1	D1007.7	none available	NRD (yeast Nuclear pre-mRNA Down-regulation) homolog
I	4599179	4599180	e18fbfe7-c32c-4256-a4c7-bcc627264a2b	802	462	-	TCTCCCCAACGAGAAACGTACCTTCTTATTTCCCATCATCTAACTTAACATATCAATTTAAATATCAAAATACAGTAATCAATGTAGTCTTCTCCATCTTGCACCACTGCCAGCAGACGCATCTTGTTATCACGAATTCCCATATTCAGAGATTAATTCCCAAAACGTCCACGTCCATTTCTTGTGCAAAGTTGTGACCTCTCTTCTACCATCTACAAGTTGAAGAGAGGAACCTTCTTAACCTTATCAATTGGTTGATGTAGAAGCATAATAACATACCTTAGAGAGGAAGTAGCTCATTAGAGCTTAGCTCCAAGCCAAGCGCCGTTGAATCCAGTTGACAAGAACAATTGGAATCGAAGTTCCATTGAGATACCGTGACCACCTCTCTCTCTGCAT…	Site67	7	WBGene00017004	nrd-1	D1007.7	none available	NRD (yeast Nuclear pre-mRNA Down-regulation) homolog
I	4599210	4599211	4e93ba6e-ec58-4a79-bf0f-f315d0773f86	854	441	-	TATCATCTTGAACTTTCATTCAATTGAGATATCAGCGAATCGGTTCAGTCCTCCATCTCTCCTGCACCACCGCCGCCGCATCTCAGGTTGTTCAATTCCAAGCCATATTGATCAAAAACGTCACGTCCAGCCTGACGGTGGAATGGTACCTCCACCACCTCATCTATACTAATAAGAGGACCACCGAACCTTGTCTACCCACGGAATAACGGTGACGGCAATAAAAGATGCATATCCCGCCAGAGTGAGGAGTTGACCCTTAGGACCAGCTCAGTGCCAATGGTAAAGGACGCTTGATAAAATCCTCGTTGGCAACGAAGGTGGTGCCGCTGGTCAGAGTCTTGCGGTGAAGGATACCCGAAAGGAAAGGTGGACCAACTCCTGACGGTAAGGATAAAA…	Site67	7	WBGene00017004	nrd-1	D1007.7	none available	NRD (yeast Nuclear pre-mRNA Down-regulation) homolog
I	4599210	4599211	0c8201cc-3109-4266-9525-4d8c987f0664	921	615	-	TATCATCTTGTCCACGATAACTAATTGAGATATCAACGATCAATCAGAGTTCTCTTCCTCCATCTCTTCCTGCGGCTACACGCGCCGCGACATCTCTCATAGTTCAATTCCAAATTTCAATTGATCCAAGTACGTACCAGGTCCATTTTCCTGACAGAAGTTGTAGAACCTCCACCACCCTCATCTATCAGTAGTAAGAAGGTGAAAGGACCACCGCATACTCCACATCAACTCGAATGTTGTGAAGCGGTTGTTACGTTCCAGCGGTGAAGAGTGAGGTGGTTGCTCGACGGTGGTCTCGCTCCATGCAATAAAGGTGACGGCTTTACGATAAATCCCCATAAGGATCGGTTGTGGTGGTGCCGATTCGGTATCGAATCCAGCCGGTGGTTCCTGTGG…	Site67	7	WBGene00017004	nrd-1	D1007.7	none available	NRD (yeast Nuclear pre-mRNA Down-regulation) homolog
I	4599217	4599218	a4ca00f8-347d-4c24-8ef7-74f482494b24	640	415	-	TTGTCTACGATTGGTTCAATTTTGAAGTATTACTTAATTCAATCAAAGTTCTCTTCCTCCAATCTCTTCTTGCACCACTGCTTCGACATCTTGATATGTTCAATTCATTCGATTAATCCAAACGTCAGAACCATTTCTGGACGGTGATGGACCTTCCACCTCATCAAGTGGTGGACCTCCACTCGTGTTCTTCTACGTCCACGGGTATGATGAGATATAATAGCACTGCCCAAAGGGAATATCGATGGTGTGCTGCTGCGGCCGATGTGGTGGCATTGCGCGAATCCTTGTTGGTATCGGCAAAGGTGAAGCCAGCTGAAATCGATGTTCTATTGAAGGAAATACCTGTGGTGACCAACTCTGGCAGAGAGGAGCCGGTGTTATCCTGAATTCCTGGTG…	Site67	7	WBGene00017004	nrd-1	D1007.7	none available	NRD (yeast Nuclear pre-mRNA Down-regulation) homolog
I	4599272	4599273	b87d58f5-fcde-45eb-8781-7abbe4ab2adb	815	501	-	CCTCCATCTTCCTGCACCACCGCCGCCGCATCTCGTTGTTCAATGTTTTCCAGAGCCCTCGATTGAGTCCAAAGCGTCCCGGTCCATTTCTGGCAGAAGTTGAAGGACCTCCACCACCTCGTCTATCAATGTGGTGAAGGACCAGCTTGTGTCCTCTTTGTCCACCACGAGTAGTGTGAAAAAAGGTGGCATAGTTACGATAGTTCTGCTTAAAGTGGTTAACTCAACGAAGCTTCTAACGCCAGCAACAATGTAAACACCCACGATAAATCTCGTTGAAGAACAAAGAAGCTACACCGATGTCAATCAATAGAGAACCTAGAAAAGGAACCAATACTCTCATGCAGAACCAAGAAATATCCTTGTAATTCCGGTAAAGAACGCTAAATTAAACGACGC…	Site68	7	WBGene00017004	nrd-1	D1007.7	none available	NRD (yeast Nuclear pre-mRNA Down-regulation) homolog
I	4599282	4599283	a9541b5e-e442-4a73-9b8e-82873e6f2b03	802	377	-	TTCCTGCACCACCGCCGCGCCGCATCTCTCGTTAATTCCACGTTTCCCAATTAATCCAAAAAACGTCCAGATCCATTTCTGCTTGGCAGAAGTTGTACCACCACCTCATCCAATCAATGTTAAGAAGGAACCACTTGTTCCCATCACCACCACGAATAATAGAACGGCAATAATACATATCGCCAGAGTGGATGACCTCATTAGAGAGACCAGCTTCAGATTGATAGAAAAGGACGGCCATAAGTCCTAATGAGGATCGGTTTGTGAAACAATTCGGTGATCAGCTCCAGCAGAAGTCTGAAGGAACTTACCTTGCAGAAGGATTTGAACCTGTGAATCGGTAAAGCATTAAACGAACGAACGACTGGAAGACCTTG	Site68	7	WBGene00017004	nrd-1	D1007.7	none available	NRD (yeast Nuclear pre-mRNA Down-regulation) homolog
I	4599292	4599293	7910c618-035f-4834-9e2c-de8c5afb5a2b	934	461	-	ACCGCCGCCGCATCTCGTTGTTCATATTCCACGTATTCAGAATTGATCCAAGACGTGCTGGTCCATTTTCTTGGACGAATGGGTGGTCCCTTCCACCTCATCCATCAGTAAGGACCACTACGTGACCTTCATGTCCCGCCGAGAATGTTGTAAAGCGATAATAATAACAATACCGCCATGTAGAGGAATGAGCTCATTGGTGACCAGCCTAACGATAAGAACGCCGCATAAATCCTTGAGTGGATATAGAAGGTGAAGCAATTGGTAGCCATACTAGCGGTGTTCCTCTGTAAGAGGAACCAACTTCTCCTCGGCAGAGGAGCCATGATATCAGGATTCCTGAAAGAGAGCAACAAAATTGAAAACGACAAGATGTGGAACACCTGAAACTGCTGGTCT…	Site68	7	WBGene00017004	nrd-1	D1007.7	none available	NRD (yeast Nuclear pre-mRNA Down-regulation) homolog
I	4599349	4599350	00e78897-6f93-430e-b8aa-0c3d2385d905	885	471	-	ACGTCCACGTCCATTTCCTGTGCGGTGAATGGTGGACCACCACCTCGTCTATCAAAGTAGAGGAAAGGTCCACCTTCAAATCCTCTTTCGTCTACAAGATGATAGAAGCGATACGAATACTTCAAAGTGGGAATGTAACTCATTGGTGACCAGCTCCCACAGCCAAGAAGCGCCAGCGTTGAATCCTTGATGACGATAGAAGAACATTTGATAGATCGGTTCCCAGCAGGTAGAATACCGTGGTGCTACCTGACGAAGAAGCCATGGTGTTGATATCCTGAATTCCGGTAAAGGTTGTCACCAATTGAAACATCAAGAAGCCACCTGGTGAACCTGCTAGGTCTTTTGTTAACTTGTAATTCGTGTTAATGTTAAAGGAAGTTGTAGGAGGAAACCTGC…	Site68	7	WBGene00017004	nrd-1	D1007.7	none available	NRD (yeast Nuclear pre-mRNA Down-regulation) homolog
I	4599354	4599355	3c52565f-1276-4f2c-95f5-a30e82739889	956	331	-	CACGTCCATTTTCTTGGCGGTGATGAGGACCACCGCCCGTCTATCATAAAGTGGAAGGTGGACCACCGGAGCTCCGTCCACGGTGTTGTTGTGGCGATGTTTGCATACCGCCAAGGTGATGACCCACGGAACCAATTTCAAACGTTGTAAAGGAAAGGTGCGGCTTACCATAAGTCCTTGTTGGAACAGCGGTGGTGGTGGTGGCTTAGCAGCGGTGGTGTATCGATCCCTGTTGGTGGTGTTCCTGAAGGTGGACCGAACCTGACGGAGATTTGGATATCAAAGAATTCCAGGTGTGGAACATTGAAATTGAACGGCACTTGAGGAGCAC	Site68	7	WBGene00017004	nrd-1	D1007.7	none available	NRD (yeast Nuclear pre-mRNA Down-regulation) homolog
I	4599367	4599368	a7f2bdaa-636d-466f-b764-fa8f8586ff14	931	350	-	CGGACGGAGTTGTGGACCTCCACCCCTCATCTACTTAGAAGACCACTGTTCCTCCAGTCCACAAAGTTGAAACATAGTTACACGATCCGCCGAGAAGGTTGAGCCACCGAACAGCTCCAAGATGAGACACCAGCGTTAAATCCTTGTTGAGAGAGCAATATATAAAGAGAAGAAGCCATTTATGAATCGAATCCCGGCGTAAGAATACCGTGCTACCTTTGAAGCAGAAGGTATATCCTGAGAATTCTTGGTAAAAGAACATTTAAAATTGTAACGACAGAAGCCAACCCGGTGAAAAGAACTCAGCAGGTCAGAGTACAGATAGTACGTGAATAGATGGATGGGTAACC	Site68	7	WBGene00017004	nrd-1	D1007.7	none available	NRD (yeast Nuclear pre-mRNA Down-regulation) homolog
I	4599370	4599371	2a50a60c-11f4-418f-8b1d-604db2d8e32d	913	277	-	ACGGAATGAAGGACCTCCACCTCGTCTATCAAGTAATGAAAGGCCTTCTAAGTCCTTCGTCCACCATGTGAAGAATGATGTTGTGAAGCATAATGCATACTGAAGTGGAATAAAGCTCGCGGTGCTGCTCAAGCGATAGAAAAGGCGCGCCGCATAGAAATCCCTTGTTGGAACGGTGAAGAGCCAGCCGAATCGAATCCTTGCAGAAATACCCGGAAAGGACCAGCCTTGCGGTGAACAGCGGTTATCCTGGAATTCCTGGTGAGCAGCAATTGAA	Site68	7	WBGene00017004	nrd-1	D1007.7	none available	NRD (yeast Nuclear pre-mRNA Down-regulation) homolog
I	4645791	4645792	48f929cd-f98d-4175-9b82-c9fda5966f46	161	503	-	AACTTGTAAACCAAGGGTTCTCTCTTCTTCCTGAAAGTGGAGGTTGGACCTCAGGAAGCAGTCTGGGTTCTTCTTGGAGCTCTAATAGCCTTGACGACCCCTGGATGGCAGTTCGGAGTGAAGTCAAGTTGCCAGAATTTCGGATGGAACTTTACCATCCTCTAATAAAGTTAGCGGCAGCGAAGAATCACATGGAACAACCTCAGAGCAAGTCTTCGAGACTCCCATAATGAAACGTCCATGTAACCTGGGATACCTAAAGGTTAACTCACATTCGAAGTGACATCGACTCTGGGGAATGATAACGTGGTGGTGGCAGCACTCAGCATCTCATCGTAGATAGCGATACTTGGTCCAGAGCTTCTTGATGATGTTGCGGTAGCTTCTTCATAGAATCCA…	Site69	9	WBGene00004415	rpl-4	B0041.4	rpl-4 encodes a large ribosomal subunit L4 protein.	Ribosomal Protein, Large subunit
I	4645802	4645803	0a83dfec-71c1-41c5-9d34-9d859822f08b	102	447	-	GAGGGTTCTTCTAAGTAGGTTAACGGACCTTCGGAACACCGGGTTCTTCTTCACCCTCTTCCTATAACTCTGCGGCCAAAACGGATGGACTTTCGCCTTCTTAATAAGAATGGCAACGAATACTTGTAGTGACCCTCTGTGGCAGTACTTTACCATCGTTGATAAACGTCCATGTCACCTCCTGGGCAGTCCCGAAGGTTGAGTCTCTTACCCATTCGAAACATCGACTCCTGGGAGTTGCGGAAGGCAACATTGCACCATCTTGTCCATAACTGGTACCTGACCTCTGCTTGCAGATGAAACATGCAGGAGCTTTCCTTCTTCATATCTGCAATGTAAACCTTCTTCCATGTATCAGCCAATAAGTAGGTGGGCCATCGTGGAAGACGCGGCCTCCTG…	Site69	9	WBGene00004415	rpl-4	B0041.4	rpl-4 encodes a large ribosomal subunit L4 protein.	Ribosomal Protein, Large subunit
I	4645849	4645850	84b4c021-7f88-4ed0-9201-5aa7ffe222fe	233	771	-	GGTTCTTCTGAGCTCTTGATAGCCTTTGATAACCTCTTCGGTAACGAGTATAGGGTAAATACAGTTGGCCAGTTGTTTTTGGAGTGGGAGCCTTGTACCCATCCTCTTCTTCGGATTAGAATGGCGCGGAATCCCGTGAATGGTGTCAACTTCTTCAGAAGAAGGCAACTTTGCTGATGAATGACGTCCATTTGTAACCTGGCCATGTAAGCTTGGTGTTGGTAACTCTCTCTCAACATTCTGCGAAAGACGTCGCTATCTGGATGTAACGTTGAGGCCATTGAGCACACTGCATCTTTATCCGGTTGATAACGAGCCTGGTCCGCGCTTCTTCCACGTATAAATTGTGTTAGCAGTGGAGCTTTCCTTTCCCGGCGGTTTCTCTTCGATAATGTAAAC…	Site69	9	WBGene00004415	rpl-4	B0041.4	rpl-4 encodes a large ribosomal subunit L4 protein.	Ribosomal Protein, Large subunit
I	4645854	4645855	86a05d27-7e05-41a9-9e9d-3f993fe3f8e9	206	437	-	TTCTTTGGAGCTTCTTCATAGCCTTAACGACCTCTTCGGATAGGTTGATAGGGAAATCGGTGAGTATGGCCAGTGAATTTAGGATAGAGGACAAACTCGGTCTACCATATCATACCACCTTACGCTTGCCATCGCGCCGCCCGCATTATGGTGTTAAGAAGTCTCAACATATCATGAACATCGCACTCTCGGGTAACGTGGTGCGCCGGCACACCTACATCTTATCCGTATAATACTGGTGTCAGACTTCTGCTTGTGTTGAACGTGTACGGAGCTTTCCTTTCCTGCGCGGCGGTTTCTACAGTTGTTGTAAACCTTCCTTTAGCTGCCTTGATGAGGGAACGGAGACGACGGCCCTGATCCTCGGTGAGCTTTCGGCCTTGTCGTCGGAAAATTGAT…	Site69	9	WBGene00004415	rpl-4	B0041.4	rpl-4 encodes a large ribosomal subunit L4 protein.	Ribosomal Protein, Large subunit
I	4645870	4645871	d1bc3023-b239-4912-b898-c6546293f1a1	116	338	-	TAGCCTTATTACTTCGGAACGGATGCGAGCGGCTAAGCTCCAAGTTGGCAACGAACTTGTTATGGCTCCGAAGGCAACAGATAAATAAACGTCCATGGTTGCCTCCTGGGCCAACGGAGTAAGTCTCTCAACATTCATGAAACATCGACTTCTCCTGGTTGCGCGGTGGTGCACGCGCAGTAACGCACCGCTGCTGCATCTTGTGCAAACAACTGGTCCAAGCTTCTGCTTGTGGTATGGCTTTTCCCTTTTCCCCGCGCGGTTTCTTCAATGTAAACCCTCGATATCAGGAACACTCAGACTCGCATGCAGAACAACAAGTGGACCTATTGAACTCT	Site69	9	WBGene00004415	rpl-4	B0041.4	rpl-4 encodes a large ribosomal subunit L4 protein.	Ribosomal Protein, Large subunit
I	4645870	4645871	0aafb2a6-349c-49f0-a6dd-2884a1a6d462	258	712	-	TAGCCTTAACAACTTCGGTTCGGATAGTACGGAAGTGAGTCGAGGTTGATTAGGAGTGGAACCCAGAACCGACTTTCAGTAATAGAAAGTTGATGCAGCGGTAATCCGGTAATGGTATTAGCTCTTAGAAGGAACAACTTTACCAGATGATGACGTATCCGATGTACCTGGCAAAGCTTAAAAGGTAAAGTCTCAACGATTCAGCGAACATCAACTCCGGGGTTACGGTGGTGCACGCATGCACTCAGCATCCGTCCGTATAAATACTGGTCTGTGCTTCTTGATGTTGACGGTTGACGAACTTTCCTTTTTTCCTGCATTGGTTTCTCTGTTTGAAACACCTCCCAGCTGCCCAACAGATGGAGGAGCGCAGAACGACGGCCTCCTTGGTCTTGCGCG…	Site69	9	WBGene00004415	rpl-4	B0041.4	rpl-4 encodes a large ribosomal subunit L4 protein.	Ribosomal Protein, Large subunit
I	4645870	4645871	c7519c3e-c14b-46d7-8ad9-ed2713cb3510	219	529	-	TAGCCTTAACGCCTCTTCAAATCGGAGTAGTAGTAGTATAGGGTGATCGTAGTTAGGCCAAAGCAGGAGTAATGGGACATGCTCGACTTCTCTTTGATGTTAGTGAGAGAGAGTTGTAAACAACGTGGTTCCGTTGATGTGTGTGTTAAGGATCCCAACCTCTTCGAAAAGGAACAAACTTTGACCAAAATAAAGAAACATCCCCATGTAACCTGGCAACCGATGTGATAAAGTCTCTTTACAATTCGGTACATCACGACTCTCTCTGGGGAGTAATGCGGTGCAACGAGCACACCTACATCTCGTCGTGTGTTGTATTAGTCTGGTACCAGGAGCTTCTGCTTCGTTAACAATGCGAGGAGCTTTTCCTTTCCCTGGCGGTTTCTCTTCGAGTTGAAC…	Site69	9	WBGene00004415	rpl-4	B0041.4	rpl-4 encodes a large ribosomal subunit L4 protein.	Ribosomal Protein, Large subunit
I	4645878	4645879	a76f354a-67d0-4c59-ad0d-01238961e084	246	414	-	ACGACCTCTTCGAACGAGATAGTATAGGAGAAGTCGAGAATGCCAAATTGGGATGGAACAGACCATCCTTCTCGAAGTTAAAGAATGATGCAGCAGAAGTCCGTATGAGACCAGCTTCTCGGTATAAACTTTAACCAGATGTTGACGTCCATGTCCTGGCAACCCCCAGAGTCTCAGCCATTCATGCATTACCTGGATGCGGAGGCAGCCACTACATCTCCGTCCGTAATAACAGTCTTGTCCAAGCTTCCTTGATGTTGACAGTAACGAGCTTCCTTTCTGATGATCTCTAAACCTTCTTAACCAGCCATTGATGGGTTGTCGTTGTGGAAAGCACGCAGCCTCCTGAAGTCTCGCGTGTCCTTACCTGTCGAGAAAACAGACGATGGACTAAGTCAG…	Site69	9	WBGene00004415	rpl-4	B0041.4	rpl-4 encodes a large ribosomal subunit L4 protein.	Ribosomal Protein, Large subunit
I	4645884	4645885	af642223-ed03-4e54-85ce-0d4a88ba3f7d	255	708	-	TCTTCGGAAACGTTGTGTTGAGTAACGGGTAGTCATGGTAATGGCCAGAATTAGGGTTATGGAAGCTCAGAACTTGTCCTTCTCAATGTTGAAAAAAAGAGTTGAAAGCAATGGAAGAATCATGGTATCCAATTCAGTGGAACAAACTCGACCAGTGTAAAGTTGACGTCCAAGTGATGTCCTTGGGAGAACCAAGAGTTAAAGCTCTATACAATTCAAAAGACATCAACCTGGAGGAATGTTGTCGTGGTGCATGTTGCACCAGTCGTCATCTTGTCCGTATAACAACTGTCTGAGCTTCTGATGACGGAGCTTTTCCTTCCGGCGGCGGTTTCTTCGAATGAAACTCTCGATATCAATTTCGCTGTTGGGAGCGGCATGGAAAAGGCGACGGCCTCG…	Site69	9	WBGene00004415	rpl-4	B0041.4	rpl-4 encodes a large ribosomal subunit L4 protein.	Ribosomal Protein, Large subunit
I	4645934	4645935	dd2807c2-1bc2-450d-8a1a-0377a6ab03a6	305	411	-	TGGGACAGTGAGCTGTCTCCTACTGTGTTAAAGAGTTGGCGGTTTGAAGTCCGATGTATGTATCATAGCTTTGTGTAAGCAGTACTTAACTTGATGAAGCGTCCTGGTAGAGCTTCCGGGATAGAGCTTAAGAAAAAGGTTGAAGTCTCTTACAGCCATGCATCAACTCTGGGATGTTGTACGTGGGCAATACGACGCATCTTGTCCGTAGAGATAAATAACTCTGAACTGTATCTTCGCGATGGCGATGCGGAGCTTTCCTTTCCTGTATATGTTTCTCTCTCTTCAAAACTTCTCAATATCAGCCTATATGAGGGAGCAACGAAAAAAACGGCCTAGTCTCGCGAGCTAGCCTCGTGTCGGAAACAGTTGCAATGGGAACTTCAGAACTTGAATACC…	Site70	11	WBGene00004415	rpl-4	B0041.4	rpl-4 encodes a large ribosomal subunit L4 protein.	Ribosomal Protein, Large subunit
I	4645941	4645942	36334ba5-2512-42b9-a528-cb95f31248ff	254	338	-	GACCATCCTTCTTGAATGGCAACGGTGATCCGATGTATCAGACCAAATAAGGCAGGACCAAGATTGGATGGTGCTGTCCTGGGCGGCTGTGGGTAAATCCAAGCGTTTGGCGTCGGCTTGGGGATGCGAGACAGCGCAGCTCAGCATCTCTGACCGTAGGATGCAACTGGGCTGGCTTCGTTGAGCGTTGCAAGTCCACTTTCCGGCAGTTTCTCTTCAATAAACCTTCTCAATCAGCCAAGAGGGGAACAACGAGACGGCCCTTCGGTCTTACGGAAGCTTTCGACCTGTCGAGATTTACCTTAGTAGGACCCAACTTGAACAGTAAACGTGGTCCA	Site70	11	WBGene00004415	rpl-4	B0041.4	rpl-4 encodes a large ribosomal subunit L4 protein.	Ribosomal Protein, Large subunit
I	4645949	4645950	d1c6bc7a-3a9d-42ae-b36f-a2c103fe8411	326	353	-	CTTCTTGATAGAAGAATGACGGTCGGTGGTAATCCGTATGGTATCGACACTTCTTGAAGGCAAACTCGATGACTGATGTTGATAAGACGTCTTGATTGGTTGTCCTCCTCCTGGGCAAGACCCGAAAGTGAGTCTCTCAACATTCGAACATCAACTCCTGGGTTACCGGACCACCTAACACCTGGCATCCGTACCGTAGCAACTACCCGGTCAGACCTGCGTTTATACAGACCTCCCTTCGCCAATTCCTCGATGAACCCGCCACTTCACTAAGTACGGGGCCATCAACGACGGCCTCCTACGGTCTCGACGAAACAGCCCTGTCGGAAGATTATTGATGGGACCTCAGCGAC	Site70	11	WBGene00004415	rpl-4	B0041.4	rpl-4 encodes a large ribosomal subunit L4 protein.	Ribosomal Protein, Large subunit
I	4645955	4645956	e3c14f50-1603-4014-9496-40f2a7bfd896	328	607	-	GAGTTGAGTGAAAGTTGAGAACGAGCGTGGTTCCGTATCAGTAACTCTCGGTGGCAGTCTCGATCCAGATGATAAGTACGTCTGATGTGACCTCCTGGACGACTCGGTGGTTGAAGTCTCTTTACATTCGGTCATCGACTCCGGGTTATGGTGCACGATGGTATACCATCAGCATCTGTCCGGTTAACAGTCTTTGTCCAGGCTTCTTAGCATACGAGGAGCTTTCCTTTTCTCCTGCGGCAGTTTCTCTTAATAAACCTTCAAACTGCCTCACAAGTAAGGTCGACAGGAAAAACGATGCCTCCTGACTACGGTGACCTTCAACCTGTCGAGATTATTGATGAGGGAACCTCAGTACTCAAGTATCGATGACGGAACCACAAGCTTGTGGTAACCGGG…	Site70	11	WBGene00004415	rpl-4	B0041.4	rpl-4 encodes a large ribosomal subunit L4 protein.	Ribosomal Protein, Large subunit
I	4645973	4645974	f667249d-0090-4bb3-965d-f21735275faf	316	511	-	AACGGTGGTTCCGTTGAAATCAGCTCTAGTGGCAAACTCAAGTCTTGATAATGACGTCCAAATGTCCTGGGCAAAGCTTGAAGGTTACTCACCATTCATTGCATCAGTCTCCTTGGATGTTACGGTGGCACCATCTTGTCCGTAGATAACAACCGGTCATTCTGCCGTATGTTGGAGCTTCCCTTTCTGACGGTTTCTCTCTCTCTGCAATAAACCTCTCATATCAGCCCACAGTAGGGAATTGCAAAGCAGCATTCTCCAACTTAACAAAATCAACCTGTCGACAACAATGGGACCTCCAACTAAATCGAAGTCCAAAGCTTGGTAAAGCTGGCTCCGGAGGCAATAGCTGGTGAAATCAAATTCTTCTTGTTGTTGCGTTGCAGACAACGAGCACCT…	Site70	11	WBGene00004415	rpl-4	B0041.4	rpl-4 encodes a large ribosomal subunit L4 protein.	Ribosomal Protein, Large subunit
I	4645979	4645980	bdf57968-1cff-4a16-bec3-015f9ef80fab	378	373	-	GGTTCCGTATGATGTCTAACTTCTCTCAGAAGCAGTACTTTAACTAATGATGAGCATCCACATGATGTCCTCCTCCTGGGGCGACAAAAAAGGATGAGAGTCTCTCAACGTTTCCTGCATGTCATCGACTTCCTGCTGTGTAATGCATGTGGCACAAATTACACCCTCCACATCTTGTCCGAATAAATACTGACTTTGACCTCTCTCTTGTTAAGATGTAGTCGTGTCCTTCCTTTTCCGGCGATTCTTCAGTTGTGAAACCTTCTCGACTACTCACAAAGTGGGGAACGGCGTGGAAGACATACGGCCTTATGTCTGGCGAAACCCCAACCTTGTCGGAAACAATGCTTAAGTGGGACAGCATACTGCTTGG	Site70	11	WBGene00004415	rpl-4	B0041.4	rpl-4 encodes a large ribosomal subunit L4 protein.	Ribosomal Protein, Large subunit
I	4645980	4645981	99b894b0-6649-4e37-8082-615a52647a21	360	363	-	GTTCCGTATGGTACTAGCTTCTCACGGTGGCAGAACTCGGTCCAGGTTGATATGTGACGCATCCGAAAGATGTAACCTCCTGGGGCGACTCGGTGTCTCTTCAACATTCGAACATCGACTCCTCTGGGGTAATGCGGAAGGCCGGCAGTGCGCGCACTCGGACTTGTCCGTAATGACGATACTGCCTGGTGGTCCGGTGCTTCGTGTTAACCATGGAACTCACAATTCAAGAAACCCTCCCAATCAGCCAATATGGAGCGACGAGGAAGAACGACGGCCCTACTACCCAGTGGTGACCAACCTTGGATGGTATTACAGTAGGGACCTTACGACTCGAATCACGACGTGTCTTTACCCTGAACC	Site70	11	WBGene00004415	rpl-4	B0041.4	rpl-4 encodes a large ribosomal subunit L4 protein.	Ribosomal Protein, Large subunit
I	4645980	4645981	161f6bc4-9726-4561-8253-9e93bf717925	248	344	-	GTTCCGTAGATGGAACAGAGCTTCCAAGGCGGACCAAGGCAACAACAATGGCAACAAACGGCCTCTTGGTCTTGGAGCTTTCGACCTTGTCAAAACAACAGTTGGAGGCCAACTTGATCAACATGTCCATACCCATGGTCAGGGGTGAGCAGCAGTTGGGTTACCGAAACAGATCTTCTGTGCAAGTTAGACATACGGGTGCCAACGGTGTGACCACCTTGATGTGGACGAACAAGTCCTCCACGGACATTCCATTCTAAAGCTCCTGTACCGGTGATTGTGGGGAACCGATAAACACGTAACAGGATTGGCGTACCAGTCCACCAAAACTTCAATTTTGCTGC	Site70	11	WBGene00004415	rpl-4	B0041.4	rpl-4 encodes a large ribosomal subunit L4 protein.	Ribosomal Protein, Large subunit
I	4646002	4646003	283e4651-73d7-4e30-9f91-b6c7c49192ac	383	306	-	TCTTGAAGGACAAACTCGGTCCAGAGTGAAATAAGAAAACGTCTAGATGGTTACCCTTGGGCCGAACCCATGTGTTGGTAACTCACAGCCAAAACACGGTCCACCTTGGATGTAATGACGGTGCACAGCCGCCATCAGCATCCCGTCCGTAAATAACAACCGGTCACGTGCTTCATGACGATACGGAGCTCCTTCCGATACCTCAAAACCTTCAAAATTCACGAATGGAACGACGGTGAAAACGACGGCCTTGGTCTTGACCCATACCTGTCATGGTGAAACAATTGATGAGGACTCCTCAACGAC	Site70	11	WBGene00004415	rpl-4	B0041.4	rpl-4 encodes a large ribosomal subunit L4 protein.	Ribosomal Protein, Large subunit
I	4646015	4646016	d9875363-1917-4d23-abf3-955bc0530758	334	225	-	CTCGGTCCTTGATATAAAAGCGTCCGGGTTCTGGGGACAACCTGAGAGGCGCCTATCCTGGATACCGTCGCACACTGGTACCTGTCGCAACACTGGTCTCACCTGGCGACATGTTATCGTCCGGCAGAGTTAGAACCTTCTAATCAGCCTACAATGGGTTTGACGGTGAAAGCGGCCTTGTCTTGCAAAGCTTTCGACCTTGTCGAACAACAAGTGGGTCAGCGC	Site70	11	WBGene00004415	rpl-4	B0041.4	rpl-4 encodes a large ribosomal subunit L4 protein.	Ribosomal Protein, Large subunit
I	4646015	4646016	d3a5b235-850e-42a4-ab81-b39564b9210e	133	179	-	CTCGGTCCAGTAAGCGTCCGAAACACTGGCACATTATCTTGTCCGTATAACAACTGGTCCGACGGAGCTCCGCTGTGTTAACAGCAGCTCGAAACCTTCTCGATATCACGGAAATCGGTCTTGCGAAGCTTTCCCCACCCTTGTCGGAACAACAGTGGGACCCAACTCCAAGACGGTCC	Site70	11	WBGene00004415	rpl-4	B0041.4	rpl-4 encodes a large ribosomal subunit L4 protein.	Ribosomal Protein, Large subunit
I	4646050	4646051	c2ff84c3-f7b1-44bd-8bfa-21c96dc07575	447	532	-	CTGGGGCGAGCTTGAAAGGTTGAGTCTCTCTCGCATTCGAAACATCGACTCCTGGGTTGCGTGGAGGCACAAGCCGCCACGCCAGCATCTGTCCGTATAACACTTTGTCTGCGCTTCTGCTTAGAGTACGGTTACGAGCTCCTTCCTTTCCGGCGCGAATCTCTTCAAAACCTTCCCATAGTTACTTCCTTCACAATGGAACAACGAGTGGTAACAACGGCCTAGTCTTGACCCAACCTGTCGGTGAAACAATTGATGTGGTGGAACCTCAATTAACTCGAAGTCAATGTTAGCGTACCGAGCTTGATGAAGTCCAGGAAATTCCTGAACAACAATGTCGGAACGTATCTCTTCTCGGGCAGTTGATAACGGTGCCATAGAACACCTTGAAAGTGTGGA…	Site71	26	WBGene00004415	rpl-4	B0041.4	rpl-4 encodes a large ribosomal subunit L4 protein.	Ribosomal Protein, Large subunit
I	4646056	4646057	40abba09-7768-4cd8-b0e7-6280783e5cec	475	253	-	CGAGCTTGAAGGTGTTAGGTCTCTCACCAAAGCATCATCCTGGAATGTTAACGTGAGGCAGCGGCACTACATCTTCTGTCCGATAATTACCGGTCTTGAGCTTCTTGTGTTAACAATATGTGTCCTTCTCCCGCACAAGTTTTCTCTTCAATGTAAAACCTTCTCAATAACCGCCATTGATGGGAATTGCGGAAACGAGCCTCTCGATGTCTCAGCTCGACCTTGGTCGAAACAATGTGGAGACCTCGATAAC	Site71	26	WBGene00004415	rpl-4	B0041.4	rpl-4 encodes a large ribosomal subunit L4 protein.	Ribosomal Protein, Large subunit
I	4646081	4646082	0ca1a916-6a56-4497-92f1-ba845031a11a	447	265	-	AACATTCATGTCATCATCCTGGAGTTACATGGTGCAGAAGCACATCACATCTTATCCGTAAATAACAACTTGTCTTGACCCTCTGTTAACAGTACGAACTTCCTTTTCCTGCGGCAGTTTCTCTTCAAAGTTGTAAACCTTCAATCAGCCTCACAGAATGGAACGATGGTCGACAGCCTCCTTGAGTCTTTACGGTGACCCCCAACTCGTCGAGATTATTGATGAGGTCAACGACTCGATCACGACGGTCCATGTCCCCCCGGTA	Site71	26	WBGene00004415	rpl-4	B0041.4	rpl-4 encodes a large ribosomal subunit L4 protein.	Ribosomal Protein, Large subunit
I	4646081	4646082	98315e99-9e32-4a9f-b0c8-8c93c0c68f3f	417	455	-	AACATTCATGACATCAACTGGGTTGCGGTGCGCGATCAACATCTCGTCCGACAGATAACATACTCTTGTCTAGACCTCTGCTTGAATGTTAACGTGGAGCTTCTCCTGCGCAATTCTCTTCAGTTGATCCAACCGCCTCACTAAAGTGGATACAAAGGAAACGGCCTCATGTCTCGAAGCTTTCAACCCTGCCAGGAAGATTACAGGGACCCCAACTTTGTAGTCAATGCGAGTCCAACGACCCGGTGAACCGGGATTCCCGGTGCAGCAGTTAGCTGTGAAACAATCTCTTCTTGGCCATAGTTAACGTATAACGAGGTGCTTAACGAACACCTTAGTGGCAACATGATACCTCAGCACATATTTCCAAAGCTCTCCTGTCCGGAACGAGGTACCTTC…	Site71	26	WBGene00004415	rpl-4	B0041.4	rpl-4 encodes a large ribosomal subunit L4 protein.	Ribosomal Protein, Large subunit
I	4646085	4646086	ef623471-cb03-4688-a6c9-a05a75a6594c	469	203	-	TTCATGACATCGACTCCTGGGGATGAATGCGGTGCACAGCGCACTTGATCCGTTACCGTATAATCACTGAACCTCACGTTAACAACGGAACCGGCAATTCCTTCGAAACCTTCTAATCAGTCAGTGGGGAATTAACGGTGACAACGAGCCCTAGTCCCGAACCACCTCGTCGGAAAACAACAGTGTTGTGGACCTCAGCGAAC	Site71	26	WBGene00004415	rpl-4	B0041.4	rpl-4 encodes a large ribosomal subunit L4 protein.	Ribosomal Protein, Large subunit
I	4646085	4646086	b55738bb-538d-4998-a83d-9bd83c621bd7	467	298	-	TTCATGACATCAAACTCCTGGGTGTAATGGCGTGGCACGGCAGCACCTCAGCATCTTGTCCGTGGAGATGATAACCGGTCCGAGCTTCTTCTGCATGTTAAACGGTTGCGGTGCTTTCCTTTTGGCGGTTTTCTTCTTCTCTTCGAAGTTGACTTCCCAGCCTTCAGCCACAAGTGAGGTGGGAAGCAACGGTGACGAACATGCCTCGATGGTCTAACGCGGTGTCCCCCCAACCTCTGGATATGGTGTTTATTGAGTGGGTGCCTCAACATCAGCAGAGGATATTCGATAACGTACC	Site71	26	WBGene00004415	rpl-4	B0041.4	rpl-4 encodes a large ribosomal subunit L4 protein.	Ribosomal Protein, Large subunit
I	4646085	4646086	d2332ffc-0611-41ba-8d0d-5c67f4f6cd0b	443	461	-	TTCATGACATCGACTCCTGGGATGATGCGTGGAGCGGCGGCACGCTACATCTTGTCCGTGATATACCGGTCTAAGCTTCTTGTATAACGGTGAGCTTTCCTTTCCGGCGGTTTCTCTTCAAACCTTCTTGCCTCAGCCTTGATGGAGCAACGGAAACGGCCTCGGTCTTGACGAAGAAACCTTCAACCTTGTCGGAACAGTATTGATGGACCTTTAACTTGAGTTCCATATGATGTCCACAAGCTTGGAAAACCGGAATTCCTGGAACAACAGTTACAGGAAATCTTCTCCCCTGGCTAATAACGTTACATGTGCCGATGCGGTCACCTAGAAGGCAACATGTGTGTCCTCGGCCTAAGCTCTCCTGTCCTGGAACAAAGGTACTTCCTCCTCACGAAA…	Site71	26	WBGene00004415	rpl-4	B0041.4	rpl-4 encodes a large ribosomal subunit L4 protein.	Ribosomal Protein, Large subunit
I	4646085	4646086	3162e94e-935b-4e63-bcae-6763ec55a72d	409	506	-	TTCATGACGTCGACTCCTGGGAGTAAACGGGCCGCCAAGTTATTACTGCCATCTTGTCCGTAGATACAACTGCTGGTCCGACCACTCCGCTTGGATGACGGTGATAGCGGAGCTTCTTTTCCTTGCATAATAATTCTTGCAATGAAATCCTATTCAATCAGCCACAGGGAGTTGCGGAAAAGCGACGGCCCTCAGAAACTCACGAAGCTTGCCAACTGGTCGGTATTATTGATGAGGCCTCAGTCTAGAAAATCGACGATAGCGAAGTACAACTTGGAGCTGGATTCTCCTGGCAACAATGCAGGGTATTGGCAATCTTTCTTGGGATAATAATAAGCGTTGCGGTGCCATTGTATGGATACCTTGGCGGTTGGGCGAAAATCAGTGTCCTTCTCGAGC…	Site71	26	WBGene00004415	rpl-4	B0041.4	rpl-4 encodes a large ribosomal subunit L4 protein.	Ribosomal Protein, Large subunit
I	4646093	4646094	c8644c85-1d80-405a-b2a0-698cb0fe4f90	457	418	-	ATCGACTCTGGGTTGTTGCGGTGGCAACAAACGCACTACGGATCTTGTCCGTATAACAACTGGAACCAGAGCTTCTTCGTGTTAACGATGCGGAGCTTTCCTTTTCACGGTTCTCAAAACCCCACCACCACTAATGGAATCGACAGAAACACAACACCTAACTACAGAACCAACCTGTCAGAAATTAATGAGGACCAACTTAGTCAAAACGTAACAGTACGAAACTAGGTATTCCGGTATTATTATACCAAGGAAAATTATCCTGGAACAATAACGTTACAGACAACGTACACTATGAAGGCAACATGTCCTCCAGCGCGGTAGCCCTCCGAAGCTCCTGAGCTTGTGTTTGTGGGTACCTCTGCAACAGTGGAATAGGCAGCACGTCCAGTTCCCAGA…	Site71	26	WBGene00004415	rpl-4	B0041.4	rpl-4 encodes a large ribosomal subunit L4 protein.	Ribosomal Protein, Large subunit
I	4646093	4646094	d765ddae-8ad9-4505-9f9b-754054dabbab	465	338	-	ATCGACTCCGGGGATGCGGAGGCACTTTATCTCGTCCGCATATAACTGGTCCGCGGCTTCTGCCGTTGAACGGTTGCGGAGCTTTCCCTTCTTCGTCGATTCTCTCTGATGTACCTTCCTTACCGCCTTTATTGATGGAACGGTCGGAGACAACGGCCTCGGTTCTTACGGTGGAAGCTTACCTTGACAGGAACAGTACGCTGATGGAACTCAATTAACTTAAATCGGTTGCGAACTTTACCCCGAAAAGCCGGGATTCCCGGTGCAGCAGTTACCAAAGGAAACCGTGATCTCTTCTAGGCAATAACGGTGCCGATGGCCACTCAGAATGGATGTAC	Site71	26	WBGene00004415	rpl-4	B0041.4	rpl-4 encodes a large ribosomal subunit L4 protein.	Ribosomal Protein, Large subunit
I	4646095	4646096	2307a0b1-bb90-408c-8b45-edca3096d7b9	480	184	-	CGACTCCTGGGATGATGCGGTGGTGGCACGAGCACACTACATCTCCCGACCGCAACTTGTCCAAGGCTTCTGATAGCGGAGCCTTCTTGTTCTTCAAAACCTTCTCAATTATTCACCAATGGAATAGGAATAACGGCCTCAACTTGGAGCTAACCTTATCGGTGAACAACAAGTGGACCTTCAG	Site71	26	WBGene00004415	rpl-4	B0041.4	rpl-4 encodes a large ribosomal subunit L4 protein.	Ribosomal Protein, Large subunit
I	4646097	4646098	ed44c2e3-eb75-43f3-b927-35001a4765fb	445	234	-	ACTCCTGGGATGTTAAACGTGGTGCAACAAGCACACCACATCTGGGTCTGATAATTCTTGGTCTGACTTCTGCTTGTATAACGGAACCCTTCTCCTTTTCCTGCACGGTTTCTGCCAAGTTGTAAACTTCCCAGTAACCTCGCTCATTGATGGAAGCGGTCGGTGGCAACGGCCTCCCCTTCGTCTCGCAAAGCCCCCCAACCTTGTCGGTGAAACAATTGATGGACCTTCACA	Site71	26	WBGene00004415	rpl-4	B0041.4	rpl-4 encodes a large ribosomal subunit L4 protein.	Ribosomal Protein, Large subunit
I	4646099	4646100	c57283c3-1da8-465f-99ae-c6d39ac3ed23	478	362	-	TCCTGGGATGTTGGTGGCACGATGCACTCAGTTCATCTGACCGTAGATATCGGGAGCTGATCATGTTAACGGTTGCGGGATTTCGGCAATTCTTCAAATGTTGTAAACCTTCTCAATCAGCCCAACAGATGGGGAATAGATTGGAAGCGGCGGCCCGGGTCTCGCAAACAACCTGTCGGAAAAACAATTATGATGGACCCTCAAAGTCATCCAAATCGGTTAACGTGTGGGTGATCCACGAGCTTGAGCTGGGAGATTCCGGAAGGCAACAAGCTGAGGAGGAAACGATCTGGGGCAATGTGTTGACGGGGATGATGAGGCCGAATGGAGCGCTCGGTGTAGTGGGGACGAAGCGTGGCTTA	Site71	26	WBGene00004415	rpl-4	B0041.4	rpl-4 encodes a large ribosomal subunit L4 protein.	Ribosomal Protein, Large subunit
I	4646110	4646111	966c082c-ab9e-4025-9ba6-f8ffabb19f8f	544	411	-	TGCGGAAGGCAGATAACAACTTGTCGGTATTCTGCTGTGTAAACGGAGTACGGAGCTTTCCTTGCGCGCGGTTTCATGATGTGACCTCTCGATATCAGCCCACAAAGTAAGTGGGATAACGACAGAAGAGCAACGACCTAATCTCGACAAAAGCTCAACCTTGTCATGGTATTATTAATGGTACCTCAGCAACTTGATTCAATAACATGTCAAACCCGAAGTAACCGGAAATTCCTGAACAATTAATACCGAAAATTACGTATCTTCTGGCTAATAACGTTGCAGACCACAACGAAACACTAAAGGGGCAACAGAGCTCAGATATTCTTAAAGCTCTCCTGTCTGTGATTGGTACCTCCGAAACACGTGGAATACGGGCGATGCACGTCCAGTTCCCAG…	Site71	26	WBGene00004415	rpl-4	B0041.4	rpl-4 encodes a large ribosomal subunit L4 protein.	Ribosomal Protein, Large subunit
I	4646131	4646132	71897e91-b9b6-44de-b005-5c07cd287b26	483	433	-	CAGCATCTCGTCCGGTAGAGATAAAAAACTGGTCTAAGCCTCTTGTGTAAACGATGCGGAGCTTTCCTTTCCGGCGCGGTTTCTTCGAGTTGTGAACCTTCTCGATGACTTCACAATGTGGGAATAACATGGTAAGAAACGATGCCTCCCTATGTCTCGCGAAACCCCAACCCGGCCAAATGGAACAGTATTGAGGTACCCTCGAACTGATCAGTGTCCAGACCCGGTCGGTGATTCCTGGATAACAATATACAGGAAAACAGCGATCTTCCCTGCAGTTATGCGATAACGATGTGCTTAGAGGAACCTAAAGTGAGGCAACATGTGTCCTCAGTAGCGCGGTATCCAAAGCTCCTGGTCCCTGAACGTGGGTACTTCTGAGCAGTGGTTCGGGGCAGT…	Site71	26	WBGene00004415	rpl-4	B0041.4	rpl-4 encodes a large ribosomal subunit L4 protein.	Ribosomal Protein, Large subunit
I	4646133	4646134	e003ac67-7371-47b7-b6cf-f5c4affa344c	492	188	-	GCATCTTGTCCGTTGTTAACAACCGGTCCAAGCTTCTTCGTTAACGATGCGAGCTCCTTCCCGGCAATTCTTCGATAACCTTCTTCTCAATCGCTCACAGAGGTCGGAAACAACGGCCTTGGTCTCGCGGAAGAACCCTTACCTCGGCGCCAAATTGCTTAAAGGGACCTCGACTCGCTAACGTGCTA	Site71	26	WBGene00004415	rpl-4	B0041.4	rpl-4 encodes a large ribosomal subunit L4 protein.	Ribosomal Protein, Large subunit
I	4646134	4646135	23199749-a223-42f8-ae51-da3da0e184a9	486	462	-	CATCTTGTCCGAAAATGATTTACTGGTCTGAGCTTCTTGCTTGTGTTGAACGTTGAGCTTTCCCTTTCCCGCGTTGGTTTCTCTTCGAGTTGTAAAACCTTTCTCAGTACCGCTTCACAGTTATGTGGAGATAACGGTGGTGGAAAGCACGGCCTCCCCATGGTCTCGCGGTGAGAGCTCGACCTTGTCGATGGTGACGCTGATGGACCTCAGTACCAAGTCATGACGGAACCACGAGCTTGGAGAACCGGGCTCCTTGGCACAGTTGCTGTGGAAATTGCGTATCTTCTGGGCAGTTGACGTTACGAGGACGACGGAGCTTCACTCAGAGTAGAGGGCAACATGGTTCCTCCCATGCACATATTTCTAAAGCTCCTGTCCTGATTGTGTACTCTATAG…	Site71	26	WBGene00004415	rpl-4	B0041.4	rpl-4 encodes a large ribosomal subunit L4 protein.	Ribosomal Protein, Large subunit
I	4646134	4646135	1a0cf8d0-cc64-4934-90be-74af63deb1e2	517	381	-	CATCTTGTCCGTAAGATAACAACTTGGAGCTTGAGCTTCTCTGTGTTGATGACGAATGCGGAGCTTTCCCTTTCCGGCGGTTTCTCTTTAGTTGAACCTTCTTTATCAGCCATTGAGGTAGCAACATGGAAAACGACGGATCACTTAAGACTAAAACAACCCTGGCAAACAATGGGGCTTAACCAGTGTCAGCGGTCAGTACCCTAAAGCTGGATTCCGGACAGCAATAACTAAGGATAACGTATCTTCTGGCAGTAGCGGTGCTCAAGCGAACACTTTGGGCAACAAACCCAAGATTTCAAATCGGTCCGTGAGCGGTGTACCTCCATAAAACAAGGTGTTGGCTAACATAGCGCGTGCCGTTCCCAGATCCTCAATAGC	Site71	26	WBGene00004415	rpl-4	B0041.4	rpl-4 encodes a large ribosomal subunit L4 protein.	Ribosomal Protein, Large subunit
I	4646134	4646135	a03230ed-f1e1-443e-874b-3fa24d04392b	572	384	-	CATCTTGTCCGTATAATAACGGTAACTGGTCCGAGCTTCGTTGGAGCTTTCCCTTCTGGCGGTTTCTCCGAACCATCACATAATGAGGAACAACAGAACAACAGCTCTTAATCTCACGAACTCCCTGCCAGAAACACTAATGTTGAAGGTACTACAACTCGAATGTTCTAACGTGTCTTTACTTGGTAACCGGAATTCCGGAGGCAGCAATAGCTAAGGAAACGTATCTTCTTCCGGTGCAATGACGTTACGGTGCTACGGCGGACGGTGGATATTTATTTCCCCCTGCCGGAAGCGGTGGAGTGACCTCCCTCTACGAAACACGTGGAATACGGGTGCAGCACGTCCAGTTCCTTAGACTTCCTCAACAGTTGTTGCTTCTCC	Site71	26	WBGene00004415	rpl-4	B0041.4	rpl-4 encodes a large ribosomal subunit L4 protein.	Ribosomal Protein, Large subunit
I	4646134	4646135	1568241b-18e0-4cc8-9441-6a9b778dd44a	481	281	-	CATCTTGTCCGTGATAACAACCGGTCCGAGCTTCTGCTTGAGTAAGCGGTTGCGGAGCTTTCCGGCGGCAATTCTCTTCAAAATGTAAACCTTCCCAGTCAGCCATTAAATGAGGGAACGACGGAACGATGATTACCTTGGTCTTGAGCTTTAACCCCGGCCGAAACAATCGGAACTGTTCTTACGCCACCTTCATAGCTGCATTCTCTCTTCGGGCAGTTAGTCGGATCAATCTCTCTTCTTAGCAATAGTGTCCCCCCAATAGCTACTGTTCGTTATAT	Site71	26	WBGene00004415	rpl-4	B0041.4	rpl-4 encodes a large ribosomal subunit L4 protein.	Ribosomal Protein, Large subunit
I	4646134	4646135	e199a6c3-921e-4ded-a969-220bfba3c097	531	301	-	CATCTTGTCTGATAACTTGTCCAGAGCTTCTTCACGTTAAACGAGTACGAGCTTTCCTTTTCCTGCACGGTTTTCTCTTCGATGAAACCTCAACCTCGCCTTATTGATGAGGAATAGCGAGGAACACGGCCTTGGTCTTCGCGAAAAAGCCAACCTTGTCGGAAACAAGTATTGAGGTACCCATACGAACTTAATCGATACATACTAGATGAGCTTGAGGTGGTAAAGCTGGGATTCCCGGTGCAACAATAGCCGGAATCTCTTCTTGGCAGTAATGACGTTAATAGGCTTTGATGGTCAC	Site71	26	WBGene00004415	rpl-4	B0041.4	rpl-4 encodes a large ribosomal subunit L4 protein.	Ribosomal Protein, Large subunit
I	4646134	4646135	2a3817bd-29db-4bae-abf9-da8f38e5589b	499	171	-	CATCTTGTCGTATACAATCCGATCCGACTCTTCGTTGTATAGCGAGCTTCCCTTTCTGCATAATTCTTCGAAGCTTCTCAGAGTCAACAGAGCGTGGAATAGATTGGAAGCGACGATTTCAAGTCCCGCAAAGCTTCGACCTCATTGAAAAAACAGCAATGTGGTACCGAC	Site71	26	WBGene00004415	rpl-4	B0041.4	rpl-4 encodes a large ribosomal subunit L4 protein.	Ribosomal Protein, Large subunit
I	4646138	4646139	9d5a2fd1-3d7a-4c36-adca-ffd86efefeee	514	406	-	TTGTCCGTAGATAACAACTGGTCCGACCTCTGCTTGAATGATATGCGGTGAACTTCTCGCATAATTCCTTCAAGAAAACCCAGTACCACTCACCAAGTGTGGAATAACGAAGGAAAACGACGGCTCCCATGTCCCATAGAGCCAACCTCGTCGAGGAAACAATTGATGGACCTTCAAACTTGAGCCATGCGGTCAAGAGCTTGGTGTGAACCGGATTCCTGTGCAGCAATAGCTGAGGAAAACAACGTATCCGGGGCAATGACGGGGCCGGCGGTATCACCTAAGTGGGGCGAAACGAGTGTCCTCTCAGTGCGCGCAATTTCCAAAAAGCTCTCCGGTCTGTGGTCGAAGGGGTACCTCTATATGCCGTAATAGGCAGCACATCCAGTTCCAGGCTCG…	Site71	26	WBGene00004415	rpl-4	B0041.4	rpl-4 encodes a large ribosomal subunit L4 protein.	Ribosomal Protein, Large subunit
I	4646143	4646144	5122f9d9-65b7-4d01-aab0-408ca25c3281	471	403	-	CGTAGATATTACCGGTCAGTGCTTCTTTGTGTAAAATATGAGTAGCGAGGAGCTTTTCCTTCATAATTCTTTAAACCTTCTTAGCCTCGCCTTCACAGTGGGAATATGCATGGAAACGACGGCCTGTCTCGTTAACCCAACCTGAGCCATGGTGATTATTGAGTGGACCTCGACTCTTAATTCCATAACGTGAGCTTAGTAACTTGAAACCGGGAATTCCGTGGCAATATAGCTTGGAAAACATATCTCTTCCCTGGAGCAGTAACGTTAACGGTGCCACGGCGAAATACCTAAAATGGAGGCGAAACAAGTCCTCGCACGTTTTCCATGTCTCCTGTCCCTGAACGTGGAGAACTCCATAAACAGAAATAGGCAGCACGTCCACTCAAGGAACTCAAG…	Site71	26	WBGene00004415	rpl-4	B0041.4	rpl-4 encodes a large ribosomal subunit L4 protein.	Ribosomal Protein, Large subunit
I	4646143	4646144	1fa12738-6aab-40c1-ac4c-706ab79e0c22	513	393	-	CGTAGATATAACTGGTCCGAGCTTCTGAAACGGTTAACGGTGAGCTCCCTTTCTCGCGGTTTCTCTTCGAGTTGTAAACCTTCCCAAATCAGCCTTTGATGGGAGCGACGGTGGTGAAACGACGGCCTCCCCTCGGTCTTGCGGAAGCTCGACCTTGTCGGAAGATATTGATGGGACCAGACTCGATCAATGTCCAACCTAAGAACCGGTATTCTCCTGAGCCAACAAGGTAACAATCTGGCTAATAGTTACGTTAACGGTGCTTTAACGAGCCAACTCAGCAATGGACGAACAAGTCCTCTCGACACAATTCTTAACTCTCTGTAACGGGTACCTCCTCTATGCCAGAATAGGCAGTTGCACGTCAGTTCCCAAGACTCATTTTATGTTGCT	Site71	26	WBGene00004415	rpl-4	B0041.4	rpl-4 encodes a large ribosomal subunit L4 protein.	Ribosomal Protein, Large subunit
I	4646147	4646148	74fb98a1-a53f-4528-8939-bc0834622935	383	404	-	GATAACAACTGGTCCATTTCTGCTTCGGTATAGCAATGCGGAGCTTTCCTTTTCCGGCGGTTTCTCTCTCTTCGAAGTTAAACCTTCTCCTAATCACCTACAGTAGGGTTTGCATGGAAAGCGACGGCCTTGTCTTGCGGAAACACCTTTTTCATCTTGTTTTGGAACGACAGTACCCTACTTTGATTCGATGCGTGTCCCACAGAACCGGTGTAAACCGGGATTCCTGGAGGAAAGGAAGCCATGAATTCTGGGCAATGCGTTGCGGTACCAGCATAGGTTACCTTAAGTGGGGCGCAAGCATCCATTCCTAAAGAGCTCCTCCTGGTCCTGGAAAGCGGGTCTTCCTCTCCTGCGAAACGGCAGCGACGTCCATAGTTCCCACGGATCTCAATTGAT…	Site71	26	WBGene00004415	rpl-4	B0041.4	rpl-4 encodes a large ribosomal subunit L4 protein.	Ribosomal Protein, Large subunit
I	4646157	4646158	b28b34c8-7bbb-4ce2-9cd3-dffe4b27b8e8	543	486	-	GGTCCGAGCTTCTGTGTTAAACATGCGGAGCTTTCCTTTCCGGCGATGGCAATGTTTCTCTCTCTTCGAAGAGATCCTTCCCAGTACTTCACAAGTGGGAGCGACGGTGACGACGACCTTGAGACTCGAAAAGCTTTCACCTGAACAGGAACAGTCGCCTTTAAGGGAGACCTCAACGACTCTTAGTAGATTCAATGACGGTCCACAGAGCTTCGGTAAAGCTGGGTTTCCCGGTGCAACAATGCAGGAGAAACAGTATCTCTTCTGTGCAGTTGGCGGATAGCGGTGCTTACGGTGGAGCACCTCGAATGGGGCGGTAAACGCCGTAAATGCCTCCAAGCGGCACATATTCTCTTCTCCTCTCCGAAAGCTCCCGTCCGGCATGGAAACGTGGGGTAC…	Site72	36	WBGene00004415	rpl-4	B0041.4	rpl-4 encodes a large ribosomal subunit L4 protein.	Ribosomal Protein, Large subunit
I	4646157	4646158	c6643c5e-db75-4fff-88c1-3c45e7311bf3	553	429	-	GGTCCGAGCTTCTTAACGGTTACGGAGCTCCTTTCCGGCATCGGTTTTCTCTGCGATGAAACCTCTCGATATCAGCTTCACAAGTGGGAGCGACGGTGAAACGACGGCCTTGGTCTCGGTAAGTAAGCTTGACCTTGTCGGTGATCAATTGATGGACCTAACTTAAGCCAATGATGGTAACCATGACCCGGAAGTAAAGCTGGGAATTCTGACAACAATGCTAGGAAATCAGCGTAATCTTCTTGGGCAGTTGCGGTAACGGTAGGAAGCTACGACGAGCCAGCACCTCGAATGTGGTGGGACGAATTGGTCCCACGGCGCATATTCCAGAAACTCCAGACCTGATTGGAGAAACTCTATGAGCCAGAGAAAAGTTACAGGCAGTTGCACGGATCCAGT…	Site72	36	WBGene00004415	rpl-4	B0041.4	rpl-4 encodes a large ribosomal subunit L4 protein.	Ribosomal Protein, Large subunit
I	4646157	4646158	80b58f64-bc59-468f-b712-50a1099ce55b	564	433	-	GGTCCGAGCTTCTGCGGTGTACGAGTACGGTGACCTTCCTTTCCGGCAATTCTCTCTTCGAGATGAAAGCTTCTCAATCAATTTCATTGATGAGGAACGCAGAGAAAAGACAACGGCCTCCTTGGTCTCGCGAAGCTAGTCCTCGTGGCATGTTTATTGATGAGGTACCTCAACAACTTAGCCAATAACGTAACCCAAATGACCCCGAAAGCGGATTTCCTGGTGACAACAGTAACCGAAGGGAACGGAGCTTCTTCTTCCGGGCAAGTGTTAACGTTATGTGCCGACGTATTTACCTAAAGTGAGGGCTGTAACATGATACCTCTCATGCACAAATTTCTCTAGAACCCGGTCTCGTATTGTACCGCCTCTACGAACAGAGAATCGGACAGCACGTCC…	Site72	36	WBGene00004415	rpl-4	B0041.4	rpl-4 encodes a large ribosomal subunit L4 protein.	Ribosomal Protein, Large subunit
I	4646161	4646162	54e410a7-6610-4673-a3f0-b6e8d31a798c	523	202	-	CGAGCTTCTTTGTGTTGACGATGCGGATTCCTTCCTGCGGCAATTCTCTACACAAAACTCAATCGCTTCAGCGATGGAGCAACGATGTGGTAACAACGGCCTCCCTCGGTTCTAAACCAACCTTATCGAGAAACAGTTGGACTCAACAACTTATCAACATACCAGACCTGAAACCAGGAATTCCTGGCTGCTATACTAGGAA	Site72	36	WBGene00004415	rpl-4	B0041.4	rpl-4 encodes a large ribosomal subunit L4 protein.	Ribosomal Protein, Large subunit
I	4646162	4646163	f4b775b5-1a81-4e59-8715-30ed270c052c	529	187	-	GAGCTTCTTTGGTGTTGAACGGTAACAGAACCTTCTGGCGCAGTAATTCTACAGTGTAAACCTTAGTACTACCTTATGTGGAGTACGAGGAAAACAACGATTCCCTGAGACTAGCAAAAAGCTTCAACCCGTCATGGTGAAACAGTATTGATGGACTCAGCAAACTCAAGTCAATGACGGTCCAATA	Site72	36	WBGene00004415	rpl-4	B0041.4	rpl-4 encodes a large ribosomal subunit L4 protein.	Ribosomal Protein, Large subunit
I	4646171	4646172	163fb7d8-e54a-4092-8cfa-0b5a3b5bec01	521	166	-	CTTGTGTTGAATATAATGCGTAACGGAAGCTTTCCCTTTGTATGTTTTCTTCAAAACCTTAATATCAGCCTTTAGAGGGTTTGTTACGGAAAAACATGCCAATGGCTCATGGTCTCGTTGAAAGCTTCGAACTGGCAGGAAACAAACAAGTGTGGGACCTCAAGTA	Site72	36	WBGene00004415	rpl-4	B0041.4	rpl-4 encodes a large ribosomal subunit L4 protein.	Ribosomal Protein, Large subunit
I	4646171	4646172	cf30fa51-ef73-48a2-8035-f4692c66b7e8	551	395	-	CTTGTGTTGAACGGTAACGAACTTTCCTTTCTGTTTCTTCAAAGTTGACACCTCTTAACCTCAACAAGTGGAACGACGGAAAGACAACGAAGCCTCGGTCTTACGGAACCTTACCTTATCGATGGAAACAAGTGGACCTTCAACGACCTCTTAGCCTTAGTACGGTCCATGTCCCGGAAGTGACTAGGGATTCCTGGTGCAACAACTAGGAGATTGCGATCTTCTTGGCAGTTGACGTTACGGTGCCGATGCGGTGGCCAACCTTGAGTGAGGGCAACGATGTCCTCCAGACGGAATTCCAAAGCTCCTGCGTCCAGGATACGGTGAAGGGAGACCTCTGCAAACAGGAGTTAGGCAGCACATCCAGTTCAGGACTCAGCAGTGTTGTTGCTGCC	Site72	36	WBGene00004415	rpl-4	B0041.4	rpl-4 encodes a large ribosomal subunit L4 protein.	Ribosomal Protein, Large subunit
I	4646180	4646181	f7a0a02a-73aa-436b-8fec-1d5ac3279870	514	156	-	ACGGTTGCGGAGCTTTCCTTTTCCGGCACAATCTATGTGACCTTCTCAACTATTCACAGGGAGCAACGAGGAAAACGAATTATATCTCGCGAGCTCAACCTGTCACGGTATTACTAATGGACTCAACTCGGCTAACATGTCTAATGTCCTGAAACC	Site72	36	WBGene00004415	rpl-4	B0041.4	rpl-4 encodes a large ribosomal subunit L4 protein.	Ribosomal Protein, Large subunit
I	4646180	4646181	718692a5-7b09-4a22-a8b4-01a9a8d4cf91	555	399	-	ACGGTTGCGGTGCTTTCCTTTTCTCCGCATAAGTTTCTTCAAGTTGTGAAACCTTCCCAGTAACTACCATTGATGGGAACGAACGGAAACGACGGCCTCGGTCTCGCGGTGACCTTCATACCTTGGCGTCGGAGATTATTTGTTGTGGGTCCTCAACGACTTGATCGATGACGGTCCACGAGAACTTGAGCTGGGTTTTCTGAGGCAGCAATAACCGGGTGGAAATTGCGTATCTTCTGGGCAATAGCGGTGCCGTATGGGCTGAGTGGGGGCGGTAGCGGGAACCTTCCACGGCACGGAGCTCCGAAAGCTCTCGTCCAGGATGGGTGGACCTCTGCGAAACAGGTGGTTAGGCAGTTTAGCACATCCAGTTCCCTCGGTACTCAGTTTGATGTTAGC	Site72	36	WBGene00004415	rpl-4	B0041.4	rpl-4 encodes a large ribosomal subunit L4 protein.	Ribosomal Protein, Large subunit
I	4646181	4646182	d20e033c-63df-49cf-a185-2fb60d2bbfe4	468	325	-	CGGTTGCGGGTCCTTTCCGGTGGCGCACGATCTGCAGTTGTAAACCTTCCCATGGTCAGCCCGCAGTGGGGCGACGGAACGCGGCCTCCTTGGTACTCGCGGTCGACCTTGGTCGGAACAACAGTGGGACCTCAAACCTTGGATCGATGACGTGTCCACAGCTTGGTCCGGGATTCTGGGCTAATCTCTCTTCTGGCCACCACCATCCACCTGCGGGCAACCACCCAGCACTGAGCTTCCCTGGTCCGGAACGGAACTTCCTCCGACACGTGGAATATTGGGATGCGGCAACGTCCCAGTTTCCAGACTCTGCGATGAATAATGC	Site72	36	WBGene00004415	rpl-4	B0041.4	rpl-4 encodes a large ribosomal subunit L4 protein.	Ribosomal Protein, Large subunit
I	4646187	4646188	16b43933-2f0a-4035-b9e4-fd2ba0982b90	585	422	-	CGGAGCTTCCGGCGCGGTTTCTCTGCCATGAAACCTTCTCGATCAGCCACAAGTGGGAGCGCACGGAAGGAAGACGACGGCCTCCTTGAGTCTTAAGAGCTTAACCTTGCCGAGAAGATCAACGATGTGCTCAAACTTAACCATAAGCGTGAGCTAAGCTTGGAAAAGCTGGATTTCCCGGATAACAATAATTTATTAAGGAAACGTATCTTCTGGCAGTTGAGCGTTGTTGTGCCATGTATGGAGCACCTTGAGTGGGATAACAAGTGTTCCTCGGCATATTTCCGAGCTCTGTCCGTGGAAACGAGGAGAACCTCTCCACGAGCAAGGAATACGGGCAATAAGCGATCCAGTTCCTTATCCTCATTAAAGTATAGCTTGGCCTTGGTGTTAATAGTA…	Site72	36	WBGene00004415	rpl-4	B0041.4	rpl-4 encodes a large ribosomal subunit L4 protein.	Ribosomal Protein, Large subunit
I	4646187	4646188	ef8a928d-2169-45d8-89b2-ed0ae498c823	513	339	-	CGGAGCTTTCCCTTTTCCCACAATCTCTTAGTTGAAACCTTCTTACTACCTGCAATGTAGGAACACCGAAACAACCTAACTGTAACCCAACCTGTCGGTGAAGATTATTTAATGGACCTCAACTTGAGTCAGTAACGTACCAAGCTTCGGAACTAGGATTCCTGAACAATATACAGAAATTGTATCCTGGCCGGGACAGGCGTCCTTACTCAATGTGAGGGCAACGAGTGTCCAGCACATATTCTAGAGCTCCTGTCCAGGATGAGGTACTTCCTCTGCGAAACAGAATACAGGGCAGTTGTATGCACGTCCAGTTCCTCAGGTACTCAGTTAATGCTC	Site72	36	WBGene00004415	rpl-4	B0041.4	rpl-4 encodes a large ribosomal subunit L4 protein.	Ribosomal Protein, Large subunit
I	4646187	4646188	8214cd22-f9bd-4b18-bcbd-098aba238319	426	166	-	CGGAGCTTTCCTTTCTGTTTTTCTCTTTGAGAAAACCTTCCGATGTTATCAGCCTAAGTGGGTTTGCATGGAAACGATGGCTCACCCGAACTCGTTACGAAAAAAGCTCGAACCTGATGCTGAAACAACAGGACTCAGCACTCTAGTGTCAATGTGACGTGTGTCA	Site72	36	WBGene00004415	rpl-4	B0041.4	rpl-4 encodes a large ribosomal subunit L4 protein.	Ribosomal Protein, Large subunit
I	4646187	4646188	234e6a60-216b-463d-8d61-8736eb1710aa	509	145	-	CGGAGCTTTCCTTTCTGATGTTTCTTCAAAGTTGTAAAACCTTCTTACTGCCAGCATGGGATAACGGAAGCAACGGCCTCCCCTCGGTCCAGCGAAAACCTTCACCTGTACAATGGAAACAATTGATGTGGGACCTCAATATGTC	Site72	36	WBGene00004415	rpl-4	B0041.4	rpl-4 encodes a large ribosomal subunit L4 protein.	Ribosomal Protein, Large subunit
I	4646192	4646193	cf179e51-d534-49f2-854c-758afad34a6e	614	207	-	CTTTCCCTTTTCCTGCGGTTTTCTCTTTAAGGAACCTTCCAGTCAGCCGCCAAAGTGGTGGGAACGCAAGGAAACGGCCTCCCCCTGAACTCGATGGAAGCTCGACCTTGTCGGAAACAATTTGATGGAGGACCTCGACTCGTAACAATGACGGTGACCATGCTTGAGGAAATTCGGGGATTCCTGGGCGGTTTATACCAGTATGGA	Site72	36	WBGene00004415	rpl-4	B0041.4	rpl-4 encodes a large ribosomal subunit L4 protein.	Ribosomal Protein, Large subunit
I	4646198	4646199	793c203d-acf7-4161-b7a4-5fdb5a23a85b	501	380	-	CTTTCCGGCGGCAGTTTCTTTATAGAAACCTTCTCGACAATTGAGGGAGCAGCATGGAAGCAACGGCCTCTCTCTTGACTCGAGCTTTTTCGACCTGTCGGTAACAGTAGGACCAAGTCGACTTAAGTTCAATGACGTGTCCAGTGCTTGGAAAAGCTGGGAGCCCCGGAAGGCAATTAATAGCTGAGGAAACAGCGTATTATCTCTTCTGGCAATAATAAACGTTACGAGGTGCCACGGTCGCCCTTGAGTGGGGCAAACAGTTGTATCAGACACATAGCTCTAGAGCTCCTGTCTGGAACGAGAGGTACCTCTCCTCTGACAGCGGTGGAGTTACGGGCAGTTGCGTCCAGTTCTAGTACCAACAAATAATACCACCC	Site72	36	WBGene00004415	rpl-4	B0041.4	rpl-4 encodes a large ribosomal subunit L4 protein.	Ribosomal Protein, Large subunit
I	4646198	4646199	7c57d3a7-4e49-4724-ab50-4f625bef323b	578	129	-	CTTTCCGGCGCGGGTTTCTGCCAAACCTCTCAATCAGCCATTATATGTGTGGGAACGATAACATAAAGGTGAACGATATTTCAGTACCTAAAGCTCAGAACCCGTCGGAATTAATTGATGGACTCAGCA	Site72	36	WBGene00004415	rpl-4	B0041.4	rpl-4 encodes a large ribosomal subunit L4 protein.	Ribosomal Protein, Large subunit
I	4646198	4646199	6829d78d-bb61-4a14-a3f3-1c2eade1e874	474	421	-	CTTTCCGGCAGATGTTTCTCTGCAGTTGTGAACCTTCTATATATCAATTTCATTGAATGAGGGAGATATGTACGGAGAAACGACGGCCTCCTGAAGTCTCGCGGAAGCTTTCATACCTTGTCGAGAAACAATTGAGGGACTCAGCAACTTAGATCAATGACGTGAAATGTCCAAAGACCCCCTGGTGTGAACCGGGATTCCCTGTGCAGCAGTTAACTAAGGAAATTATATCTTCTCCCGGGCAGTTAACGTTATGTGCCATATGAGCCACCTAAAGAGGCAGCAGTGTCCTCGAGCATATTTCTAGAAGCTCTCTCTCATCCGGAGATATGTGGTACCTCTGCAACAAGAAGAATACAGGCAGTTAGCACATCCAGTTCCCAGTTGTCTCATTGATGT…	Site72	36	WBGene00004415	rpl-4	B0041.4	rpl-4 encodes a large ribosomal subunit L4 protein.	Ribosomal Protein, Large subunit
I	4646200	4646201	ed8eb49d-ebb1-4b46-910c-4fbcae5ba36b	556	271	-	TTCCGGCGCGGTTTCTGCAAAACCTTCTCATATCAGTTCACAAGTGGGATAACGAGGAAGAACGACGGCCTCCCCTAAAACTCGCGGAAACCCAACCCGTACAGGAAGTTTATTGATGGACTTACGACTTGATCGATGAAACGTGTCCAGTCCTCGAAAACTAGGAGCCTCTGAGCAGCAGTTACCAGAGCATATCTCTTGGAGCAGTTAACGATACATGGAAAGACCCAACGAACACCTGATGAGGCAACAAGTCCTCCCAGCGGCGGCT	Site72	36	WBGene00004415	rpl-4	B0041.4	rpl-4 encodes a large ribosomal subunit L4 protein.	Ribosomal Protein, Large subunit
I	4646205	4646206	b249b9a9-5981-46c9-9dbd-fb08a18068f7	595	255	-	GCGCGGTTTCTCTCTTCGATGAACCTTCCAGCTGCCTCGCCATTGATGGGTTTATGCCAGAAGCGAAGCGGCTCCCCGTAACTCTTGGTGAGCTTCTAACCTTGTCGAAAGCTTACAGTGGGACTCAACTCTTCGAATCGATAACGTGACCAACCTGAAGTCCAGGAATTCTGTGGATAGCAGTTACAGAGGAGAACAGAATCTCTCTTCTCTGGCAATATAGTAACGTATGCAAAGGGCTGCGGAGCCATCCAC	Site72	36	WBGene00004415	rpl-4	B0041.4	rpl-4 encodes a large ribosomal subunit L4 protein.	Ribosomal Protein, Large subunit
I	4646205	4646206	49a59ae3-fc76-4ba3-9409-f635f568b594	573	161	-	GCGCGGTTTCTTCGAGTTGTAACCCTTCCTTAATGACTATTCGCAAAGTGAGGGAACGACGTAGCGGCCTCCCTATGGTCTTGAGCTTTTCGACCCTTGGATCGGAGGAAATTTACCAAGTGGGGACCTTACGGATCCCTGAAATCGATATGGCGGAAGCT	Site72	36	WBGene00004415	rpl-4	B0041.4	rpl-4 encodes a large ribosomal subunit L4 protein.	Ribosomal Protein, Large subunit
I	4646205	4646206	cf302021-41ca-49d3-9cfc-a06ca9300d50	454	340	-	GCGCGGTTTCTCTGCGATGTGGTAACCCAAACCGCCATTAATGGAACAACGAAACACGTACCCCCTAAGTCTTGCGAACCTTCAACCTTGCAAGATTATTGAGTGGTACCTTTAAACTTAGTCAATGACATGTCTTAGTACCCGAAAACCGGGATTCCTGAGCAGCAGTTACCAGATTTGCGAATCTTCTTGGGCAGTTAACGTATGTAGACCACGACGAACACTCGAATGTGGAGGCAACGAGTACCTCTCGGCACGATCTCTAGACTCCTGTCCGGAACGAGGTACCTCCGAACAGGAATACGGGCAGCACGTCAGTTCCTGACTTCAGCAGTGTTGC	Site72	36	WBGene00004415	rpl-4	B0041.4	rpl-4 encodes a large ribosomal subunit L4 protein.	Ribosomal Protein, Large subunit
I	4646208	4646209	237c39a5-8e1d-4daa-bd2f-1b8f68de7fa6	533	101	-	CGGTTTCTCTTCGAACCTCGATATCGCCCACAGTGTGTGGGATGACGGCGGCGGCCTTGGCCGCAAGGTAACCCAACCTGAACAAACAATTGATGGACCTT	Site72	36	WBGene00004415	rpl-4	B0041.4	rpl-4 encodes a large ribosomal subunit L4 protein.	Ribosomal Protein, Large subunit
I	4646208	4646209	f24f75ea-b211-4119-886c-f09d02f73a18	586	166	-	CGGTTTCTCTGCCAGAGTTGTAAACCTTCTTTGACTCGCCCACAAGTGGATAAACGAATGAGACGATTCAGTGTCTCGTGACCCAACCTCGTCGGAACAATTGGCCTTGACTTGCCTTCGACGTGTCCACGGTCCCAGAGCCGGATTCCCTGAATAGCTGAGATCT	Site72	36	WBGene00004415	rpl-4	B0041.4	rpl-4 encodes a large ribosomal subunit L4 protein.	Ribosomal Protein, Large subunit
I	4646208	4646209	5c220558-45f2-44eb-adfa-1a09a548d84e	494	359	-	CGGTTTCTCTGCGATGAAACCTTCAGCCCCGCCCATTGATGGGAGCGACGGTGAACGACGGCCTCCCCGGTCTCGCGGAACCCCAACCTGTCGGAACATTATTGATGGACCTCGCAACTTGATGTCAGTTGCGGAACCAAACCCGAGAACCGGAGATTCTTGAACAACAATACCAAGGAAATTTACATATCTTCTGGCAGTTAACGTATACGGTGCCAACGAACAACCTAAAGTAAGGGCAACGATGATACCTCGACACAATTTCCGAAAAAAAAGCTCCTGTGGCGAAGGGTGACCTCTGCGAAACAGAAATACGAGGCTAAGTTGCACATCCAGTTCCCAGAACTCAATAGTGTTGC	Site72	36	WBGene00004415	rpl-4	B0041.4	rpl-4 encodes a large ribosomal subunit L4 protein.	Ribosomal Protein, Large subunit
I	4646208	4646209	a625975a-5abb-4fa9-a717-610f52ad9455	144	149	-	CGGTTTCTCTTCGAATAGAAACCTTCCCGATATCAGCCCACAAGTGGGATGACGGTTTCACTGCCTTCTTCAATCAACTCTACCCCTGTTCAAATTTTAGTGCTTACTATTAACTATCTCAACAAGCCTTCTTGACAAGATAGCTGAAC	Site72	36	WBGene00004415	rpl-4	B0041.4	rpl-4 encodes a large ribosomal subunit L4 protein.	Ribosomal Protein, Large subunit
I	4646210	4646211	58ac24a0-0762-45a3-a31e-40069bb8e48c	547	340	-	GTTTCTCTTCGATAAAACCTTCTAATATCAGCCTCACAATAAGGGCAACGGAAAACGCAGCCTCCCTTGGTCTTGCGAAGGTCAAACCTTGTCAATCGATGGGACCAACTTGATCAAAGTAACAGTCCACGAGCTTGTGTAGCTGGAATTCTGGAGGCAGCAATAACGGAACAAATCTCTCTTCTGGCAGTTAACGTTAGCGAAGGACCAGCGAACCACCACTAAGTGGGCGAAACAAGTCCACGGCACAAATTCCTAAATTTCCTGTCCGTGACGAAGGTACCATGACGAATACGGGCAACGTTAACGTCCAGTTCTCCAGACTCAATTAAATAGCTCC	Site72	36	WBGene00004415	rpl-4	B0041.4	rpl-4 encodes a large ribosomal subunit L4 protein.	Ribosomal Protein, Large subunit
I	4646215	4646216	e8598004-85da-46e3-947f-4821431481ac	466	182	-	TCTTCGAGTTGTAAACCTCAGTCAGTTTCACCAAAGTGGGAGCGAGGAACGACGGCCTCCTTACATGTCTCGCAAAAAAGCTTTACCTGTCAAACAGTCGCTGTTGGACTCAAAACTTAAATCGATGACGACTAAACCCGAAAAAGCCGGAAGCCCCGGTGCAGCAGTTACCAAGGAAAATT	Site72	36	WBGene00004415	rpl-4	B0041.4	rpl-4 encodes a large ribosomal subunit L4 protein.	Ribosomal Protein, Large subunit
I	4646221	4646222	05f76894-fa8a-4726-9a48-9bb886aa87bc	588	340	-	AGTTGTAACCTTCCCAGTCAGCCATTGATGGAAGCAACGGAAGGAAAACGACGGCCCCCCTATGTCTCGCGAGAGCTTACCTGTCGGTGAACAGTCAAAGAGGACCTACGAACTTGGTAGCCCAATGACGTGTAACCACAAGCTTCGGAACCAGGGATTCTTGGTGCAGCAGTTACAGGAAATTACGTAATCTTCTCCGGGCAGTTAACGATGTGCTTAACGAACAACTGTAGTGGGCAATGGTACCTCTCGACGATTCTTGAACTCTCATCCAGGATTGAGGAAACTCTGCAAACAGAACAGGCAGCACGTCATCAGTCCCAGGACTCAAAGTTGTTGC	Site72	36	WBGene00004415	rpl-4	B0041.4	rpl-4 encodes a large ribosomal subunit L4 protein.	Ribosomal Protein, Large subunit
I	4646221	4646222	a0d0ae85-b143-4d22-a51f-fc94e59a0ee5	574	100	-	AGTTGTAAACCTCCCAACTATTCACCATTGATGGAAACGCCGAGAAAACGATGCCTCCTGTCTCGTGTCCCAACCTGTCGGATTTACAGTGGACCTCGAC	Site72	36	WBGene00004415	rpl-4	B0041.4	rpl-4 encodes a large ribosomal subunit L4 protein.	Ribosomal Protein, Large subunit
I	4646221	4646222	11b97112-6359-4fe6-b9a3-4b4bd089408d	580	247	-	AGTTGTAAAACCTTCCAGTATCAGCCCATTGATGAGGAACGACGGTGACGATGCCTCGCATGTCTCGACGAACCAACCTGTCGGAAGATTACCAGTGGACCTTTATCCATGTTCAATAACAGATGTCCATGACCTGAAAGCCGGATTTCTCCTGGTGCAGCAGTTACCGGTGAAACGCCGATCTTCTTGGCAATGTTGTAACGTGGTGCCATAGCGTGGTCACCTTAAAGAGGCGACGAGTGTCCTC	Site72	36	WBGene00004415	rpl-4	B0041.4	rpl-4 encodes a large ribosomal subunit L4 protein.	Ribosomal Protein, Large subunit
I	4646221	4646222	6504d2fa-7316-416e-936f-0430e878c1b0	604	114	-	AGTTGTAAAACCTTCTTTATCAGTTTCATTGTTGGGAACGGAAACGGCGGCCTCCTTTGGTCTTACGGTGACCACGACCTGATCGGAAGATTTATTGATGGGACCTCAACGGTC	Site72	36	WBGene00004415	rpl-4	B0041.4	rpl-4 encodes a large ribosomal subunit L4 protein.	Ribosomal Protein, Large subunit
I	4646221	4646222	072d4023-4c21-481c-afeb-647913f76f3d	593	120	-	AGTTGTAAACCTTCCAGACCGCCACAGATGAGGATAACGGAAAACGATGCCTTGGTCTTCGCGAAACCCACCTTGACAGGATTATTGTTGGACCTTCGACTGAGCCAATGACGAACTGCA	Site72	36	WBGene00004415	rpl-4	B0041.4	rpl-4 encodes a large ribosomal subunit L4 protein.	Ribosomal Protein, Large subunit
I	4646225	4646226	a93ce313-5915-491e-9cf9-970c946a8a6c	580	176	-	GTAAACCTTCCAAATCAGCCCCAGTAGAGGAGCAACGGTGAAGGAAAAGAACGGCCTGACGGTCTGCAGAAAAGCTTTACCTGTCAGGAAGCATCAACAAGATGGTACCCAACTCAGAATCGATGACGTGGAAGCTAGTCCCCGGAAAAGCAGGGAATTTCCTGGATAGTTACCAG	Site72	36	WBGene00004415	rpl-4	B0041.4	rpl-4 encodes a large ribosomal subunit L4 protein.	Ribosomal Protein, Large subunit
I	4646225	4646226	846b16d1-b375-428d-98ca-888d086e2e38	578	132	-	GTAAACCTTCTCAATATCAATTCACAGTGGGGTTTGCAGAGAACAGACGCCTTTGACTTGCAAGAGAGCTTTTGACCCTGGATTGGAACAAGCTGATGGGTCCGCTGACGACTTCGGATCAGAATTGGTCCG	Site72	36	WBGene00004415	rpl-4	B0041.4	rpl-4 encodes a large ribosomal subunit L4 protein.	Ribosomal Protein, Large subunit
I	4646225	4646226	38d4ba38-a74c-4e62-9fca-80216fa02af7	555	101	-	GTAAACCTTCTCGATAGCCATTCACAAGAGGCAGCGTGGAAGACATAGCCTTGAGTCTTGCGGAACCCCAACCTCGTCATGGATATTGATGGACAATGAAC	Site72	36	WBGene00004415	rpl-4	B0041.4	rpl-4 encodes a large ribosomal subunit L4 protein.	Ribosomal Protein, Large subunit
I	4646346	4646347	7d6f3400-2381-4923-99f7-79ecf3c23090	595	51	-	CCCCCCCCCCCCCCCCCCCCCCCCCCCCCCCCCCCCCCCCCCCCCCCCCCC	Site73	6	WBGene00004415	rpl-4	B0041.4	rpl-4 encodes a large ribosomal subunit L4 protein.	Ribosomal Protein, Large subunit
I	4646347	4646348	e15f87c0-57a1-40b2-b51d-6471b8e135f0	604	165	-	CTTTCGACCTTGTCGGAAACAATTGATGGGAACCAAAACCAGAATCGATGCATACCAATAAGCTCAGGAGACAGAGGGTGAGACTTCTTCTGCGATCGAAAATATAGGCTATGTTGCACGTCAGTTCAGGCTTTACCAAATAGTTGCTCCTTGCCTAAAATAATG	Site73	6	WBGene00004415	rpl-4	B0041.4	rpl-4 encodes a large ribosomal subunit L4 protein.	Ribosomal Protein, Large subunit
I	4646445	4646446	b82e335a-a75b-41e1-91d1-29db584a2f53	556	94	-	CTTATTCAATACACAGTGGGGAAGCGACGGTGGTAACGTCGTGCCTTGGTCTTGCGGAGCTTGCTTGTCGGTATAGCAGGGACAACGACTTGAT	Site73	6	WBGene00004415	rpl-4	B0041.4	rpl-4 encodes a large ribosomal subunit L4 protein.	Ribosomal Protein, Large subunit
I	4646445	4646446	ba9371ea-2bca-4c2f-b0aa-34c5cfb4e9b4	534	101	-	CCCAGTATCAGCCCAGCGATGGAGCGACGGTGAAACGGCCTATGTCTCGCGGTGAGCTCGAACCTTTGTCGAGCGGTATTGATGGACCTCAACGACTTGAT	Site73	6	WBGene00004415	rpl-4	B0041.4	rpl-4 encodes a large ribosomal subunit L4 protein.	Ribosomal Protein, Large subunit
I	4646445	4646446	eca49897-f22e-4b31-8763-f71d8ca49b51	603	115	-	ATAGAAGCTTCTAGTACCGCCAGATGGAACGACGGTGGAGAAAACGGTTATGCCTTGGTCTTACGGTGAAGCTCACCCGTCATGGTATAACCAGATGGGACTTCAACGACTTGAT	Site73	6	WBGene00004415	rpl-4	B0041.4	rpl-4 encodes a large ribosomal subunit L4 protein.	Ribosomal Protein, Large subunit
I	4646445	4646446	64ac2e27-200b-4fd2-ba9e-dc4238b7a75b	619	98	-	CTTACTATCGAGGGCGCGAAGGAAAGCATGCGGCCTCTCCCCATGGTCTTGAAGCTTACCTTGTCGATGGTGAACAATTGATGGACTCACAACTTGAT	Site73	6	WBGene00004415	rpl-4	B0041.4	rpl-4 encodes a large ribosomal subunit L4 protein.	Ribosomal Protein, Large subunit
I	4646450	4646451	2aa790fb-2311-49dc-910e-fb1d41738587	572	126	-	TCCTGCACAATCGAATGTAAACCTTCTCAACTACCACAAGATGGAGCAACGGAAACGACGGCCTCTTGAGTCGTGAGCTTACCTTGTCGGAACAGTATTGATGGACCTCAACGACTTGTATCGATG	Site74	5	WBGene00004415	rpl-4	B0041.4	rpl-4 encodes a large ribosomal subunit L4 protein.	Ribosomal Protein, Large subunit
I	4646450	4646451	11280027-1caf-49f4-a1f4-460ffa0307a8	604	105	-	CAATCATTCATTGATGTGGAACGGAAAACGATGGCCTCCCTAGTCTCGCGGTCCCCAACCTTGACAGGAAGCAATTGATGGACCTTCAGCAAACTTGAATCGATG	Site74	5	WBGene00004415	rpl-4	B0041.4	rpl-4 encodes a large ribosomal subunit L4 protein.	Ribosomal Protein, Large subunit
I	4646461	4646462	3d7fb6a6-30ac-44b1-b5c4-43ad684d04bf	576	111	-	CTTTACCCAGCCATTGATGGAGCAACGGTGGTCGACGGCCTTGGTCTTGAAGCTTTCGACCTCGTCATGGTTTACAGATGGGACTCAACGACTTTATCGATGCGGTCCACG	Site74	5	WBGene00004415	rpl-4	B0041.4	rpl-4 encodes a large ribosomal subunit L4 protein.	Ribosomal Protein, Large subunit
I	4646477	4646478	35108e4d-b7f7-41b5-b17e-8a860dc7b0cb	517	183	-	TTGTATGATAACGGAACCTTTCTCGCGGCGGTTCTCTCTGCCAAGTTGTGAACCTCCAATATCAACACAGATGGAGCACGGTGGAAAACGGCCTCTTGGTCTTGAGCTTTAACCTGAGCAGCATGGAAACAACAGTGGGACTCAGACTTGATCGAAACGTGGAACCGAAGACCCCGAAGAGCT	Site74	5	WBGene00004415	rpl-4	B0041.4	rpl-4 encodes a large ribosomal subunit L4 protein.	Ribosomal Protein, Large subunit
I	4646526	4646527	b30d8b60-f256-45f9-ba4f-681e709afbb0	785	335	-	CAATGTTGACGTAGCGGTGCCGCGATGGAACACCTGAAAATGAGGGGCGACAGATGACCTCCAGCGGCGCGCATATTCCAGCGGTTTGTAAGCTCATCCGGAACAGAGGTACCTCTGCAACAGAGGAAGTTGGGATGGCAAGGTTGGTAGGCAATAGCACATCCAGTTCAGATCCACAAGTGTTAATGCTTCTCCTGGCCTTGGGTTGTATGGGCCTGTCTTCTGTTTTCTTCTTCTTCTACTGTAGGGGACCTGGCAGATAGGAAAAGGATTCGCCAGTAGGTCATGTCAGTCAGTCAGTCATGTAATGTAATGTAATGTAGTAATGTAGTAGT	Site74	5	WBGene00004415	rpl-4	B0041.4	rpl-4 encodes a large ribosomal subunit L4 protein.	Ribosomal Protein, Large subunit
I	4771391	4771392	f3327e3f-82be-4a9e-a8a3-f1dd1dfd180a	112	395	-	TTAGACGCTAATGCGAATCTGAGGTAGGAGCATGAGGAACGCAGAGATCACATTAACCCAAACGATTAAACACACTTCAAGCTGATTTCAATGAAAGGTAACCAATTGTCAGGAACTGCTCGCGTATTTGTCGAGTGGTTACTCCATCACGGTCCGGTGTCACGTCTCTCTTGTGCAACAAAGGGTCTGAAAAACGACGCATAAAGTTGGGATATGGGATCATTGTTGAGGTTTAAATTGATTACTTGGATCCGTATTTGTGCACAAGGTATAGAATTGAAGGTGTACGAGGGTATCAGTATTGTAGGCATATGGTAACCACCTCCCATAGTTTTTCGGTGCTGACGAAGGACAAATCGGAGACATGTTTGGTCAAGTGCGTATATCTCCAAAGC	Site75	6	WBGene00019770	M04F3.4	M04F3.4	none available	not known
I	4771446	4771447	1e8f7cb0-8c1c-4a6f-af24-24c21c1fdd9d	176	243	-	AATCACATTAATTAACCCAAAGGACGATGTTTAGACAATATCACCACTTCGAACCACCGAACAGGGAACTGCTCGTATTTGCGGCGGTGATGACTATCGCGGTCTGTGTCAACATCTATTGTGCAACAATGTGGAGTCTGGAAAAAGCATGCGCAAAGTTGAGGCGAATCGTCGAAGAATTGCCGATTACTGTGGGATCTGTAACAAATTTGTGCATAGATGTAGCAGAGGAGGGGCGGATCC	Site75	6	WBGene00019770	M04F3.4	M04F3.4	none available	not known
I	4771469	4771470	af29a6b0-1394-4703-ad41-28f4708e9771	196	187	-	TTGAACACTTTAGCTACATTTTCAGTAGAAAAACTGCGCTGGCTCTGCTCGTATTTAACGGTGAGTACTCCATCACAGTCTGTGTCAGCGTCTCTTGAAGGAACAACAGAAGGTGGTCCAAGAAGATAATATTGAAGTTAAATAATACCGAAGGAGCATTGGCATGGAAGTGATGTGGTAACGAGAT	Site75	6	WBGene00019770	M04F3.4	M04F3.4	none available	not known
I	4771469	4771470	6e3c0858-146b-4d44-96ad-92d0b2234623	185	367	-	TTGAACACACTTCGAGTGACCACAGATTTCAATGAAAAAAAGAAAACCAACGTATCAAGGTATCCGCTTCGTGAATTGCCGACAACGGTGGTTGACTCCGGTCAACGGGTCCGGACACGTCTCTTGAGCAACAGAAGGGTCTGTGAAACGACACAAAGTTGGATAGAAATCGCATCGGGAGCAGCCAATTACTTTGGGATCTGTCGTATTTGTGCGGTGATGTTGTAAATTGAGGAAAGGTGTACGGTATCAGATTTGTAAGGTGCATTGGTCGCATTTCACTCATCAATATTTCCTAAACCGGTCAGAGATCAAGATCCACGGTGAAGGTATTGTTTTGTCCAGTCGTTGATGATCTCCACAGAGC	Site75	6	WBGene00019770	M04F3.4	M04F3.4	none available	not known
I	4771481	4771482	97d0a5cb-3fb9-405d-aecc-42a8aacd44e3	198	297	-	CGAGCTACCAGCTGCCGGAAACTGCTGTATTCGACGAATGAACTCCGGCCTTAAGTCCGGAGACGCGTCTTGAAGGCAACAGAGAGAGGACTGTGAAACGACGCAGAAGTTGGATAAAATCATCGTAGCAATTCGATAATCATGGGATCTGTCGAATTTGTGCATGATGTTTAGAATATTGAGGAGGTGTACGGATCAAATTGTGACATTGGTCAGCCACTCTTGATACTATTCCCGAACCATACAGTATCAAGAAACCAAGGATTGTTTTGTCAGTCGTTATATCTCACAAGCCTG	Site75	6	WBGene00019770	M04F3.4	M04F3.4	none available	not known
I	4771482	4771483	78f6c95a-6acd-4e98-ab92-fa29a258a539	112	191	-	GAGCTACCAGCGCTGGAACTTGGTATTCGACGAGTGCTCCGTCAATGTCTGGCATCGACATCTTGAAGGCAATTAGTGAAGGGTCTTGGAAAACGACGCACAAAGTTGGATAGAAGTCATCGAAATTAATTCAATACTGTGGGATCTGCAACCGTTGTGCGGCGGTGGTTGTAAATTGAGGAACGGTATCC	Site75	6	WBGene00019770	M04F3.4	M04F3.4	none available	not known
I	4807852	4807853	cfa9691f-46b0-43e2-bfee-a29955008742	750	366	+	TGATGTCCCTAAAACTGCTTTGGCATATCGCATACAAGCAATTGAACTAACCGATGACTCTTCGTTGAGATTGCACGCGGTGGCCGTAGTGGTGATTTACATGGATTTCCATTTATTGGCAGTCCATACTTCCTTATAATACGTACTGATGCCGCAGAGTTCCACCGACTTTGTATGGGAACTGTTTCAGTAATTACTTAGCTCGTCCTAATATACTGCACAAATGGCCGGTCTACGCGATTTTAAGTCTTCCTTTGCTCAACTACCCTGGAATTTATCACATATCTTATTCATCTTTATATATCCATGCTCGGGTTCCAATTTACGTGTCTAACTGTCTACCGCTCCTCTATAGAATTTGCGCGG	Site76	5	WBGene00018797	F54D7.2	F54D7.2	none available	not known
I	4807852	4807853	8f06edc9-f6d2-4613-b3e8-dab78167e083	770	378	+	TGATGTCCCCAATATAGCTTCTATTGTGTGTATGCAGCATGAAAGCTGAAACATATGATGATCACAAAGAACATGTACCGGTGAAAGCCAGTGGTGATCCACAGATCTCATCAACTGGGCAGTTCCATTTCACCATTAACTCAATACATCAACTGATGCGGATCCGATTCTTTCAATCGGGAACTGATTTCAGTATATATTACTTGTCGCCTAATCATTTGTTCAAATGGCCGGTCCTAGTCTGTAGTCATCACATAATCTAACTCCAGAATTCAACATCATACTGCGTTAACAACTTGCATCCACTCAATGACTTCCTCAAATTTACCATGTCTTTAACTCTAGTACACTGTTCCTCTCTTTATAAGAATTCTGCGT	Site76	5	WBGene00018797	F54D7.2	F54D7.2	none available	not known
I	4807852	4807853	e4eb8fe3-ac8b-4536-89a3-8a97c2100fc8	751	390	+	TGATGTCCCAATTGTTCACTGCATTGCCGTTAAGCAAGCTGAATTAACCGATGCGATCTCTCTTGCAATTGAGATTCATGTACCGGTGTAGCCAGTAGCTGATTCCTCTGGATTTCTACATCTTATTGGCGGTACCAACCAATATACGCATTAGTACAGATCCGCCGACTTTTTTTTGTATAGAACTAAATTTTCTGTAATTATCAACTGTTCGCCACTAAAATATTTATTGTTTAAAACTGGCCGGTCACAGTTTGTAGTACTTCAATCTCAAACCTCTGAATTTCATCTATTAACAACTGTGTTATTATACTAAATCCTTACTAAATGTCTCAATTCTCTGTTCTTATTAAAGTTATCTTGCTTACACCTCTTACTATTGAATTTGTT	Site76	5	WBGene00018797	F54D7.2	F54D7.2	none available	not known
I	4807894	4807895	90a1aa1d-8fd1-4339-b988-30a5f405efae	826	377	+	AAAAGCTGAAAACAACACGACGAACTTTTTGCATTGAGATTTGTCCGGTAAGCCAGTGACTGATCCACTCATCATAGATCTTCCTCAACATAATTACACTACATCAAAGTCCATCACCACCATCATTTATAATACGTTATAGTCCACAGAATCCACGATTCTCTTCTTGTATGATTAAATTTTCTCAGTAGCATTACTGTTCGCCTTAACTGCACAAATGGCCGGTACAGTTTGATATCCTACAATCTCAACCCAAGAATTTCAACACATCAACCATTGTTATCATTCTATTGGCTCCATCAATCAGGGTCACCAAACCATGTGTCTTCTAACTCTAGTTCAACTCTGTTCCACCAACACTTCTAACGGAATCTGTG	Site76	5	WBGene00018797	F54D7.2	F54D7.2	none available	not known
I	4807938	4807939	9c878daf-76e4-42b7-bb9c-40de76c4d717	823	331	+	TGGCCAGTGGTGATCCACAGGATCCTATCAACAGTCCATTTCCAAACGCATGGTACAGACCCACGATTACCTTTTTCTTTCTGACAGTGCTTCCGCTGTATTTACAAACTGTCGCCTTACCATTGTCTGTTGGCCGGTCAGTTCTGTACACATAATCTCAACTCCTGAATTCTATTTTATATATACTTGTATTATCATTTAATCCTGCTACGAGGTCACCGTTACATCTGTTCAACTCTGGTTTTATGCTCCATCGTTACTGAGAATCTGGGTACCGTTAACAACAACAAACTTGCTCCGCCATCTAGGATTTATGCCTTGGCCTTATCTA	Site76	5	WBGene00018797	F54D7.2	F54D7.2	none available	not known
I	5018794	5018795	2b2e7300-252d-4bd3-838f-831d54261636	69	293	-	TTATTCATTTTATTCATTCAAAGATGCAAGCAAAGTAACCAACATTTCAAGAAAGGAGCGAAAGTTGGTCGGACCCACAGTTGGTATTGTAAATCGAATTTTAGAGATTAGAAATTAATACCGACTTCTCAGCTTACTTTACTCTAATCTCAAACTTACTTCCGGACCGTCCTTGCGTCAATCTCGTCGACAGCCCCCAATAATGATCGAGGTCATCATATAAATTCAAGTGGTGAGCCAGTTGATGGTCGAAAATATATATCATCCGTACCTTTGTCAAAGCGTGACCTTCA	Site77	6	WBGene00003934	pat-10	F54C1.7	pat-10 encodes body wall muscle troponin C, the calcium-binding Concise description: pat-10 encodes body wall muscle troponin C, the calcium-binding component of the troponin complex of actin thin filaments; PAT-10 is essential for muscle contraction and thus for completion of embryonic morphogenesis and elongation; by homology, PAT-10 likely functions to regulate body wall muscle contraction in …	Paralysed Arrest at Two-fold
I	5018794	5018795	5becf13d-5aaa-4342-9f36-1c957c676902	64	235	-	TTATTCATTTATTCATTCAAATGATTTTATGAATGAATTAACATTTCAAGGAATTGAATGAACTGGACCCACAGTTGAGGTATTGTATCAATTAGAGATTAAATTAACTGCACTCCCTCCAGCCGACTTCACCAACTCAAACTATCCGTCCCCATCGCTATCTCGCCAACAGCCCATGTTAATCGAAAAGGCGCGCGATTTCAGAAAGCCTTCAGAGATGGTCGAGATATCCGTT	Site77	6	WBGene00003934	pat-10	F54C1.7	pat-10 encodes body wall muscle troponin C, the calcium-binding Concise description: pat-10 encodes body wall muscle troponin C, the calcium-binding component of the troponin complex of actin thin filaments; PAT-10 is essential for muscle contraction and thus for completion of embryonic morphogenesis and elongation; by homology, PAT-10 likely functions to regulate body wall muscle contraction in …	Paralysed Arrest at Two-fold
I	5018800	5018801	97f9207e-59fb-4d87-ab98-76261dd48701	77	260	-	ATTTTTATCGCCTTGTACAGAAAATAAGAAAGTGAATCGCAGCCCCAAAAGGAACGAAATGGTGAACTGGTCCCCACGAAACGTAAATCGTTTTAGGTTTAATAATGAGATTTACGACTCTCCAGCCATCAATTACTCCGAACTCTTGAACTTATCTCCTTCCGGTGGTCGTCCTCGTCAATCTTGACATCGACGCCTCCTCGATGAGTCGGTGGAGACGCGAATTCAAAGCCTTCAGCGAATGGTCGAAGATATCCGTT	Site77	6	WBGene00003934	pat-10	F54C1.7	pat-10 encodes body wall muscle troponin C, the calcium-binding Concise description: pat-10 encodes body wall muscle troponin C, the calcium-binding component of the troponin complex of actin thin filaments; PAT-10 is essential for muscle contraction and thus for completion of embryonic morphogenesis and elongation; by homology, PAT-10 likely functions to regulate body wall muscle contraction in …	Paralysed Arrest at Two-fold
I	5018808	5018809	2267119c-cd7e-403c-aa58-e80a27ab125a	103	268	-	TCATTCAAAAGTAACAAAAAATTAGTTAAAGCAATCCTTGATGGAGGAACCATACTCACCAAGAACAGTAGGCGTTACCAACCATGGGAACGTAACCAATACTTGACCATCACCTCATACTCCTCGAAACTCAATCTTTTCCGAGGAACTGTCCCTCGTCAATCTTGACAACAACCTAATGTTGAATCGGTGGAGGTCATCGGCGGAAATTCAAGGTGAGTGCCAAGTGTCGATGTTATCCGATCCCTTGGTCGGTGACGGAGCTTCA	Site77	6	WBGene00003934	pat-10	F54C1.7	pat-10 encodes body wall muscle troponin C, the calcium-binding Concise description: pat-10 encodes body wall muscle troponin C, the calcium-binding component of the troponin complex of actin thin filaments; PAT-10 is essential for muscle contraction and thus for completion of embryonic morphogenesis and elongation; by homology, PAT-10 likely functions to regulate body wall muscle contraction in …	Paralysed Arrest at Two-fold
I	5018808	5018809	33f09e8c-19ef-444d-a2cb-2253e83cc438	71	261	-	TCATTCAAAAGAAAGTAAACAGAAATTAATAAGTGTAACTAACATTTCCTTTAAAAGGAATTATGAAGTTGAACCGGACCTCATTATGTGAGATTTGTACTGCAATTTTTAAAGGAATTAGAGAGATTTAGCAACTACGACTCTTATTGCCGGACTACTCCAACTTTAAAGCTTTAGTCTTGGAACAGTCCGGCTTGCAGCCTTAATGTAACAGAAGGTCGAATATTCCAAGAGCCCAAAATGTGAAACGTGATATCCGTT	Site77	6	WBGene00003934	pat-10	F54C1.7	pat-10 encodes body wall muscle troponin C, the calcium-binding Concise description: pat-10 encodes body wall muscle troponin C, the calcium-binding component of the troponin complex of actin thin filaments; PAT-10 is essential for muscle contraction and thus for completion of embryonic morphogenesis and elongation; by homology, PAT-10 likely functions to regulate body wall muscle contraction in …	Paralysed Arrest at Two-fold
[truncated: 5,809 more rows]
