# Supplementary material for: Direct full-length RNA sequencing reveals unexpected transcriptome complexity during Caenorhabditis elegans development
Source: HighWire-hosted journal article supplement (doi:10.1101/gr.251512.119), 2020-02-01
Supplement: Supplemental_Table_S6.xlsx [file Supplemental_Table_S6.xlsx]

## Sheet: Table S6
Table S6 List of genomic position of polyadenylation sites
Chr	Start	End	Strand	Supporting reads	Gene
chrI	6328	6329	-	7	Y74C9A.3
chrI	9847	9848	-	15	Y74C9A.3
chrI	10189	10190	-	7	Y74C9A.3
chrI	10217	10218	-	9	Y74C9A.3
chrI	10222	10223	-	10	Y74C9A.3
chrI	10224	10225	-	7	Y74C9A.3
chrI	10225	10226	-	13	Y74C9A.3
chrI	10227	10228	-	7	Y74C9A.3
chrI	10228	10229	-	12	Y74C9A.3
chrI	16779	16780	+	5	Y74C9A.2
chrI	16780	16781	+	7	Y74C9A.2
chrI	16785	16786	+	5	Y74C9A.2
chrI	16788	16789	+	5	Y74C9A.2
chrI	16789	16790	+	9	Y74C9A.2
chrI	16790	16791	+	7	Y74C9A.2
chrI	16791	16792	+	21	Y74C9A.2
chrI	16792	16793	+	11	Y74C9A.2
chrI	16793	16794	+	5	Y74C9A.2
chrI	16794	16795	+	27	Y74C9A.2
chrI	16797	16798	+	8	Y74C9A.2
chrI	16800	16801	+	11	Y74C9A.2
chrI	16801	16802	+	5	Y74C9A.2
chrI	16802	16803	+	10	Y74C9A.2
chrI	16803	16804	+	10	Y74C9A.2
chrI	16806	16807	+	5	Y74C9A.2
chrI	16807	16808	+	5	Y74C9A.2
chrI	16808	16809	+	35	Y74C9A.2
chrI	16809	16810	+	21	Y74C9A.2
chrI	16810	16811	+	5	Y74C9A.2
chrI	16814	16815	+	40	Y74C9A.2
chrI	16815	16816	+	39	Y74C9A.2
chrI	16818	16819	+	6	Y74C9A.2
chrI	16820	16821	+	12	Y74C9A.2
chrI	16821	16822	+	10	Y74C9A.2
chrI	16823	16824	+	79	Y74C9A.2
chrI	16825	16826	+	18	Y74C9A.2
chrI	16826	16827	+	21	Y74C9A.2
chrI	16827	16828	+	21	Y74C9A.2
chrI	16828	16829	+	14	Y74C9A.2
chrI	16830	16831	+	154	Y74C9A.2
chrI	16831	16832	+	29	Y74C9A.2
chrI	16832	16833	+	21	Y74C9A.2
chrI	16833	16834	+	20	Y74C9A.2
chrI	16834	16835	+	21	Y74C9A.2
chrI	16835	16836	+	10	Y74C9A.2
chrI	26677	26678	-	7	Y74C9A.4
chrI	26680	26681	-	28	Y74C9A.4
chrI	26689	26690	-	7	Y74C9A.4
chrI	32072	32073	-	6	Y74C9A.5
chrI	49797	49798	+	6	Y48G1C.12
chrI	49807	49808	+	9	Y48G1C.12
chrI	49808	49809	+	13	Y48G1C.12
chrI	49809	49810	+	5	Y48G1C.12
chrI	49813	49814	+	13	Y48G1C.12
chrI	49814	49815	+	5	Y48G1C.12
chrI	49815	49816	+	10	Y48G1C.12
chrI	49816	49817	+	22	Y48G1C.12
chrI	54407	54408	+	6	Y48G1C.4
chrI	54409	54410	+	16	Y48G1C.4
chrI	54411	54412	+	8	Y48G1C.4
chrI	54421	54422	+	11	Y48G1C.4
chrI	54422	54423	+	31	Y48G1C.4
chrI	54423	54424	+	7	Y48G1C.4
chrI	81051	81052	+	7	Y48G1C.2
chrI	81057	81058	+	7	Y48G1C.2
chrI	81060	81061	+	12	Y48G1C.2
chrI	81067	81068	+	8	Y48G1C.2
chrI	86293	86294	-	8	Y48G1C.10
chrI	86294	86295	-	12	Y48G1C.10
chrI	92655	92656	+	5	Y48G1C.9
chrI	92702	92703	+	6	Y48G1C.9
chrI	92709	92710	+	5	Y48G1C.9
chrI	92710	92711	+	6	Y48G1C.9
chrI	92712	92713	+	17	Y48G1C.9
chrI	92713	92714	+	10	Y48G1C.9
chrI	92714	92715	+	21	Y48G1C.9
chrI	92717	92718	+	5	Y48G1C.9
chrI	92721	92722	+	146	Y48G1C.9
chrI	94847	94848	+	6	Y48G1C.1
chrI	94847	94848	+	6	Y48G1C.13
chrI	94868	94869	+	11	Y48G1C.1
chrI	94868	94869	+	11	Y48G1C.13
chrI	94869	94870	+	6	Y48G1C.1
chrI	94869	94870	+	6	Y48G1C.13
chrI	94882	94883	+	20	Y48G1C.1
chrI	94882	94883	+	20	Y48G1C.13
chrI	95117	95118	-	10	Y48G1C.13
chrI	95303	95304	-	11	Y48G1C.13
chrI	95304	95305	-	6	Y48G1C.13
chrI	95311	95312	-	6	Y48G1C.13
chrI	95313	95314	-	10	Y48G1C.13
chrI	108163	108164	-	9	Y48G1C.8
chrI	108164	108165	-	6	Y48G1C.8
chrI	108166	108167	-	11	Y48G1C.8
chrI	109446	109447	-	10	F53G12.1
chrI	109772	109773	-	5	F53G12.1
chrI	109776	109777	-	7	F53G12.1
chrI	109777	109778	-	9	F53G12.1
chrI	109779	109780	-	15	F53G12.1
chrI	109782	109783	-	7	F53G12.1
chrI	109783	109784	-	17	F53G12.1
chrI	109899	109900	-	7	F53G12.1
chrI	109936	109937	-	6	F53G12.1
chrI	109941	109942	-	10	F53G12.1
chrI	109942	109943	-	18	F53G12.1
chrI	109944	109945	-	8	F53G12.1
chrI	109949	109950	-	5	F53G12.1
chrI	109950	109951	-	13	F53G12.1
chrI	109951	109952	-	11	F53G12.1
chrI	109952	109953	-	6	F53G12.1
chrI	109953	109954	-	7	F53G12.1
chrI	109954	109955	-	11	F53G12.1
chrI	109955	109956	-	10	F53G12.1
chrI	109956	109957	-	128	F53G12.1
chrI	109957	109958	-	26	F53G12.1
chrI	109961	109962	-	10	F53G12.1
chrI	109963	109964	-	11	F53G12.1
chrI	109964	109965	-	76	F53G12.1
chrI	109965	109966	-	5	F53G12.1
chrI	110028	110029	-	5	F53G12.1
chrI	110031	110032	-	14	F53G12.1
chrI	110032	110033	-	14	F53G12.1
chrI	110034	110035	-	8	F53G12.1
chrI	110044	110045	-	10	F53G12.1
chrI	110045	110046	-	13	F53G12.1
chrI	110046	110047	-	10	F53G12.1
chrI	110047	110048	-	22	F53G12.1
chrI	110048	110049	-	6	F53G12.1
chrI	110049	110050	-	58	F53G12.1
chrI	110050	110051	-	33	F53G12.1
chrI	110051	110052	-	10	F53G12.1
chrI	110052	110053	-	43	F53G12.1
chrI	110053	110054	-	90	F53G12.1
chrI	110054	110055	-	54	F53G12.1
chrI	110055	110056	-	116	F53G12.1
chrI	110056	110057	-	24	F53G12.1
chrI	110057	110058	-	86	F53G12.1
chrI	110058	110059	-	669	F53G12.1
chrI	110059	110060	-	7	F53G12.1
chrI	110063	110064	-	7	F53G12.1
chrI	111683	111684	+	5	F53G12.10
chrI	111704	111705	+	9	F53G12.10
chrI	111705	111706	+	7	F53G12.10
chrI	111707	111708	+	34	F53G12.10
chrI	111819	111820	+	15	F53G12.10
chrI	111820	111821	+	8	F53G12.10
chrI	111888	111889	+	10	F53G12.10
chrI	111889	111890	+	7	F53G12.10
chrI	111925	111926	+	8	F53G12.10
chrI	111926	111927	+	27	F53G12.10
chrI	111927	111928	+	30	F53G12.10
chrI	111929	111930	+	8	F53G12.10
chrI	111934	111935	+	44	F53G12.10
chrI	111935	111936	+	18	F53G12.10
chrI	111937	111938	+	17	F53G12.10
chrI	111938	111939	+	54	F53G12.10
chrI	111939	111940	+	15	F53G12.10
chrI	111942	111943	+	12	F53G12.10
chrI	111943	111944	+	13	F53G12.10
chrI	111944	111945	+	17	F53G12.10
chrI	111945	111946	+	16	F53G12.10
chrI	111946	111947	+	26	F53G12.10
chrI	111948	111949	+	29	F53G12.10
chrI	111949	111950	+	16	F53G12.10
chrI	111950	111951	+	32	F53G12.10
chrI	111951	111952	+	17	F53G12.10
chrI	111952	111953	+	11	F53G12.10
chrI	111953	111954	+	22	F53G12.10
chrI	111955	111956	+	20	F53G12.10
chrI	111956	111957	+	11	F53G12.10
chrI	111959	111960	+	9	F53G12.10
chrI	111964	111965	+	12	F53G12.10
chrI	111966	111967	+	35	F53G12.10
chrI	111967	111968	+	76	F53G12.10
chrI	111968	111969	+	58	F53G12.10
chrI	111969	111970	+	16	F53G12.10
chrI	111971	111972	+	28	F53G12.10
chrI	112052	112053	+	5	F53G12.10
chrI	112060	112061	+	12	F53G12.10
chrI	112064	112065	+	6	F53G12.10
chrI	112066	112067	+	6	F53G12.10
chrI	112069	112070	+	5	F53G12.10
chrI	112074	112075	+	11	F53G12.10
chrI	112095	112096	+	5	F53G12.10
chrI	112117	112118	+	8	F53G12.10
chrI	112119	112120	+	13	F53G12.10
chrI	112125	112126	+	6	F53G12.10
chrI	112131	112132	+	9	F53G12.10
chrI	112135	112136	+	6	F53G12.10
chrI	112138	112139	+	6	F53G12.10
chrI	112139	112140	+	11	F53G12.10
chrI	112141	112142	+	6	F53G12.10
chrI	112142	112143	+	13	F53G12.10
chrI	112143	112144	+	5	F53G12.10
chrI	112146	112147	+	10	F53G12.10
chrI	112148	112149	+	31	F53G12.10
chrI	112149	112150	+	17	F53G12.10
chrI	112150	112151	+	78	F53G12.10
chrI	112152	112153	+	86	F53G12.10
chrI	112154	112155	+	17	F53G12.10
chrI	112155	112156	+	10	F53G12.10
chrI	112156	112157	+	6	F53G12.10
chrI	112157	112158	+	6	F53G12.10
chrI	112158	112159	+	9	F53G12.10
chrI	112159	112160	+	24	F53G12.10
chrI	112160	112161	+	9	F53G12.10
chrI	112165	112166	+	14	F53G12.10
chrI	112166	112167	+	7	F53G12.10
chrI	112167	112168	+	28	F53G12.10
chrI	112168	112169	+	8	F53G12.10
chrI	112169	112170	+	11	F53G12.10
chrI	112170	112171	+	38	F53G12.10
chrI	112173	112174	+	8	F53G12.10
chrI	112174	112175	+	18	F53G12.10
chrI	112176	112177	+	22	F53G12.10
chrI	112177	112178	+	34	F53G12.10
chrI	112178	112179	+	15	F53G12.10
chrI	112182	112183	+	22	F53G12.10
chrI	112183	112184	+	5	F53G12.10
chrI	112184	112185	+	11	F53G12.10
chrI	112185	112186	+	5	F53G12.10
chrI	112186	112187	+	7	F53G12.10
chrI	112187	112188	+	169	F53G12.10
chrI	112188	112189	+	21	F53G12.10
chrI	112189	112190	+	58	F53G12.10
chrI	112190	112191	+	10	F53G12.10
chrI	112191	112192	+	13	F53G12.10
chrI	112192	112193	+	49	F53G12.10
chrI	112193	112194	+	305	F53G12.10
chrI	112194	112195	+	58	F53G12.10
chrI	112195	112196	+	21	F53G12.10
chrI	112196	112197	+	180	F53G12.10
chrI	112197	112198	+	11	F53G12.10
chrI	112198	112199	+	514	F53G12.10
chrI	112199	112200	+	17	F53G12.10
chrI	112200	112201	+	195	F53G12.10
chrI	112201	112202	+	13	F53G12.10
chrI	112202	112203	+	73	F53G12.10
chrI	112203	112204	+	233	F53G12.10
chrI	112204	112205	+	9	F53G12.10
chrI	112205	112206	+	334	F53G12.10
chrI	112206	112207	+	85	F53G12.10
chrI	112207	112208	+	46	F53G12.10
chrI	112208	112209	+	115	F53G12.10
chrI	112209	112210	+	73	F53G12.10
chrI	112210	112211	+	9	F53G12.10
chrI	112211	112212	+	7	F53G12.10
chrI	112212	112213	+	49	F53G12.10
chrI	112213	112214	+	18	F53G12.10
chrI	112214	112215	+	25	F53G12.10
chrI	112215	112216	+	11	F53G12.10
chrI	112216	112217	+	45	F53G12.10
chrI	112217	112218	+	33	F53G12.10
chrI	112218	112219	+	12	F53G12.10
chrI	112219	112220	+	15	F53G12.10
chrI	112220	112221	+	6	F53G12.10
chrI	112221	112222	+	5	F53G12.10
chrI	112222	112223	+	53	F53G12.10
chrI	112223	112224	+	14	F53G12.10
chrI	112224	112225	+	9	F53G12.10
chrI	112225	112226	+	47	F53G12.10
chrI	112284	112285	+	33	F53G12.9
chrI	112285	112286	+	14	F53G12.9
chrI	112286	112287	+	6	F53G12.9
chrI	112287	112288	+	8	F53G12.9
chrI	112290	112291	+	14	F53G12.9
chrI	112292	112293	+	7	F53G12.9
chrI	112293	112294	+	10	F53G12.9
chrI	112294	112295	+	5	F53G12.9
chrI	112295	112296	+	5	F53G12.9
chrI	112298	112299	+	6	F53G12.9
chrI	112300	112301	+	6	F53G12.9
chrI	112301	112302	+	49	F53G12.9
chrI	112302	112303	+	13	F53G12.9
chrI	112303	112304	+	9	F53G12.9
chrI	112307	112308	+	70	F53G12.9
chrI	112308	112309	+	64	F53G12.9
chrI	112310	112311	+	16	F53G12.9
chrI	112311	112312	+	62	F53G12.9
chrI	112313	112314	+	49	F53G12.9
chrI	112314	112315	+	9	F53G12.9
chrI	112317	112318	+	12	F53G12.9
chrI	112321	112322	+	5	F53G12.9
chrI	114699	114700	+	7	F53G12.8
chrI	134027	134028	+	5	F53G12.5
chrI	153681	153682	-	9	F56C11.1
chrI	182105	182106	+	5	F56C11.3
chrI	182105	182106	+	5	F56C11.5
chrI	182106	182107	+	9	F56C11.3
chrI	182106	182107	+	9	F56C11.5
chrI	182116	182117	+	8	F56C11.3
chrI	182116	182117	+	8	F56C11.5
chrI	182117	182118	+	11	F56C11.3
chrI	182117	182118	+	11	F56C11.5
chrI	182120	182121	+	10	F56C11.3
chrI	182120	182121	+	10	F56C11.5
chrI	182123	182124	+	9	F56C11.3
chrI	182123	182124	+	9	F56C11.5
chrI	182145	182146	+	6	F56C11.3
chrI	182145	182146	+	6	F56C11.5
chrI	182157	182158	+	8	F56C11.3
chrI	182157	182158	+	8	F56C11.5
chrI	212495	212496	-	6	Y48G1BL.3
chrI	215317	215318	-	9	Y48G1BL.3
chrI	254238	254239	+	5	Y48G1BM.1
chrI	254277	254278	+	11	Y48G1BR.1
chrI	254801	254802	-	6	Y48G1BR.1
chrI	286103	286104	+	5	C53D5.2
chrI	286103	286104	+	5	C53D5.4
chrI	286109	286110	+	8	C53D5.2
chrI	286109	286110	+	8	C53D5.4
chrI	289085	289086	-	6	C53D5.4
chrI	309762	309763	-	8	C53D5.5
chrI	311785	311786	-	8	C53D5.6
chrI	314976	314977	-	16	C53D5.6
chrI	314979	314980	-	9	C53D5.6
chrI	314984	314985	-	13	C53D5.6
chrI	314985	314986	-	11	C53D5.6
chrI	314986	314987	-	17	C53D5.6
chrI	314987	314988	-	17	C53D5.6
chrI	317605	317606	-	14	Y48G1A.7
chrI	318071	318072	-	6	Y48G1A.7
chrI	323349	323350	-	11	Y48G1A.5
chrI	330982	330983	+	15	Y48G1A.4
chrI	330983	330984	+	8	Y48G1A.4
chrI	337820	337821	+	5	Y48G1A.3
chrI	337834	337835	+	6	Y48G1A.3
chrI	337835	337836	+	10	Y48G1A.3
chrI	337836	337837	+	38	Y48G1A.3
chrI	337837	337838	+	5	Y48G1A.3
chrI	347045	347046	-	5	Y48G1A.6
chrI	348296	348297	+	6	Y48G1A.2
chrI	348296	348297	+	6	Y48G1A.6
chrI	348344	348345	+	8	Y48G1A.2
chrI	348344	348345	+	8	Y48G1A.6
chrI	348345	348346	+	8	Y48G1A.2
chrI	348345	348346	+	8	Y48G1A.6
chrI	348351	348352	+	51	Y48G1A.2
chrI	348351	348352	+	51	Y48G1A.6
chrI	348352	348353	+	5	Y48G1A.2
chrI	348352	348353	+	5	Y48G1A.6
chrI	348354	348355	+	16	Y48G1A.2
chrI	348354	348355	+	16	Y48G1A.6
chrI	348356	348357	+	73	Y48G1A.6
chrI	365190	365191	+	5	R119.7
chrI	365634	365635	+	5	R119.7
chrI	365635	365636	+	6	R119.7
chrI	365636	365637	+	12	R119.7
chrI	365637	365638	+	6	R119.7
chrI	365638	365639	+	5	R119.7
chrI	368259	368260	+	5	R119.7
chrI	368269	368270	+	10	R119.7
chrI	368279	368280	+	21	R119.7
chrI	368280	368281	+	7	R119.7
chrI	368281	368282	+	5	R119.7
chrI	368286	368287	+	10	R119.7
chrI	368294	368295	+	5	R119.7
chrI	379066	379067	-	5	R119.3
chrI	379073	379074	-	7	R119.4
chrI	379074	379075	-	36	R119.4
chrI	379075	379076	-	8	R119.4
chrI	380123	380124	-	5	R119.4
chrI	380129	380130	-	9	R119.4
chrI	380554	380555	-	16	R119.4
chrI	380922	380923	-	18	R119.4
chrI	381091	381092	-	6	R119.4
chrI	381190	381191	-	6	R119.4
chrI	381210	381211	-	5	R119.4
chrI	381219	381220	-	31	R119.4
chrI	381368	381369	-	5	R119.4
chrI	381369	381370	-	5	R119.4
chrI	381453	381454	-	6	R119.4
chrI	381462	381463	-	10	R119.4
chrI	381463	381464	-	8	R119.4
chrI	381464	381465	-	13	R119.4
chrI	381465	381466	-	9	R119.4
chrI	381466	381467	-	11	R119.4
chrI	381467	381468	-	15	R119.4
chrI	381469	381470	-	6	R119.4
chrI	381470	381471	-	44	R119.4
chrI	381833	381834	-	5	R119.4
chrI	381851	381852	-	6	R119.4
chrI	381867	381868	-	9	R119.4
chrI	381879	381880	-	6	R119.4
chrI	381889	381890	-	5	R119.4
chrI	381890	381891	-	10	R119.4
chrI	381891	381892	-	6	R119.4
chrI	381892	381893	-	19	R119.4
chrI	381893	381894	-	16	R119.4
chrI	381894	381895	-	6	R119.4
chrI	381895	381896	-	6	R119.4
chrI	381896	381897	-	6	R119.4
chrI	381897	381898	-	53	R119.4
chrI	381898	381899	-	60	R119.4
chrI	381899	381900	-	7	R119.4
chrI	381900	381901	-	43	R119.4
chrI	385930	385931	+	11	R119.6
chrI	388533	388534	+	6	R119.6
chrI	388533	388534	+	6	R119.5
chrI	388534	388535	+	5	R119.6
chrI	388534	388535	+	5	R119.5
chrI	388551	388552	+	5	R119.6
chrI	388551	388552	+	5	R119.5
chrI	388552	388553	+	6	R119.6
chrI	388552	388553	+	6	R119.5
chrI	388556	388557	+	8	R119.6
chrI	388556	388557	+	8	R119.5
chrI	388557	388558	+	15	R119.6
chrI	388557	388558	+	15	R119.5
chrI	388558	388559	+	7	R119.6
chrI	388558	388559	+	7	R119.5
chrI	388563	388564	+	8	R119.5
chrI	388569	388570	+	8	R119.5
chrI	394411	394412	-	6	R119.5
chrI	461603	461604	+	8	C07F11.1
chrI	462561	462562	+	5	W04C9.4
chrI	462594	462595	+	7	W04C9.4
chrI	462595	462596	+	10	W04C9.4
chrI	462607	462608	+	5	W04C9.4
chrI	462619	462620	+	16	W04C9.4
chrI	462620	462621	+	11	W04C9.4
chrI	462625	462626	+	6	W04C9.4
chrI	462626	462627	+	6	W04C9.4
chrI	462629	462630	+	5	W04C9.4
chrI	462641	462642	+	13	W04C9.4
chrI	462644	462645	+	5	W04C9.4
chrI	462646	462647	+	10	W04C9.4
chrI	488935	488936	+	7	W04C9.2
chrI	488941	488942	+	7	W04C9.2
chrI	488946	488947	+	34	W04C9.2
chrI	489802	489803	+	5	W04C9.2
chrI	489806	489807	+	7	W04C9.2
chrI	489840	489841	+	6	W04C9.2
chrI	489852	489853	+	6	W04C9.2
chrI	489859	489860	+	9	W04C9.2
chrI	489866	489867	+	5	W04C9.2
chrI	489869	489870	+	5	W04C9.2
chrI	489874	489875	+	12	W04C9.2
chrI	489876	489877	+	7	W04C9.2
chrI	489877	489878	+	9	W04C9.2
chrI	489880	489881	+	6	W04C9.2
chrI	489890	489891	+	8	W04C9.2
chrI	489891	489892	+	22	W04C9.2
chrI	489892	489893	+	28	W04C9.2
chrI	489896	489897	+	6	W04C9.2
chrI	489897	489898	+	9	W04C9.2
chrI	489898	489899	+	9	W04C9.2
chrI	489900	489901	+	25	W04C9.2
chrI	489901	489902	+	33	W04C9.2
chrI	489902	489903	+	80	W04C9.2
chrI	489903	489904	+	82	W04C9.2
chrI	496135	496136	+	5	W04C9.1
chrI	496149	496150	+	7	Y65B4BL.3
chrI	496150	496151	+	7	Y65B4BL.3
chrI	496153	496154	+	29	Y65B4BL.3
chrI	502040	502041	-	5	Y65B4BL.3
chrI	503212	503213	-	5	Y65B4BL.4
chrI	506202	506203	-	5	Y65B4BL.4
chrI	506214	506215	-	18	Y65B4BL.4
chrI	506215	506216	-	9	Y65B4BL.4
chrI	506216	506217	-	31	Y65B4BL.4
chrI	506220	506221	-	20	Y65B4BL.4
chrI	506224	506225	-	31	Y65B4BL.4
chrI	506225	506226	-	14	Y65B4BL.4
chrI	508978	508979	+	5	Y65B4BL.7
chrI	508978	508979	+	5	Y65B4BL.2
chrI	508986	508987	+	7	Y65B4BL.7
chrI	508986	508987	+	7	Y65B4BL.2
chrI	509034	509035	+	10	Y65B4BL.7
chrI	509034	509035	+	10	Y65B4BL.2
chrI	509046	509047	+	12	Y65B4BL.7
chrI	509046	509047	+	12	Y65B4BL.2
chrI	509050	509051	+	43	Y65B4BL.7
chrI	509050	509051	+	43	Y65B4BL.2
chrI	509051	509052	+	5	Y65B4BL.7
chrI	509051	509052	+	5	Y65B4BL.2
chrI	509054	509055	+	7	Y65B4BL.7
chrI	509054	509055	+	7	Y65B4BL.2
chrI	509056	509057	+	135	Y65B4BL.7
chrI	514208	514209	-	5	Y65B4BL.5
chrI	515229	515230	-	6	Y65B4BL.5
chrI	515236	515237	-	9	Y65B4BL.5
chrI	515237	515238	-	55	Y65B4BL.5
chrI	515238	515239	-	30	Y65B4BL.5
chrI	516434	516435	-	12	Y65B4BL.5
chrI	516435	516436	-	9	Y65B4BL.5
chrI	516439	516440	-	5	Y65B4BL.5
chrI	516442	516443	-	6	Y65B4BL.5
chrI	516448	516449	-	10	Y65B4BL.5
chrI	516450	516451	-	5	Y65B4BL.5
chrI	516454	516455	-	6	Y65B4BL.5
chrI	516456	516457	-	5	Y65B4BL.5
chrI	516457	516458	-	15	Y65B4BL.5
chrI	516461	516462	-	13	Y65B4BL.5
chrI	520407	520408	-	8	Y65B4BL.6
chrI	521378	521379	-	12	Y65B4BL.6
chrI	521380	521381	-	19	Y65B4BL.6
chrI	532538	532539	+	6	Y65B4BM.3
chrI	532552	532553	+	6	Y65B4BM.3
chrI	532951	532952	+	5	Y65B4BM.3
chrI	532952	532953	+	6	Y65B4BM.3
chrI	533001	533002	+	5	Y65B4BM.3
chrI	533001	533002	+	5	Y65B4BM.2
chrI	533016	533017	+	5	Y65B4BM.3
chrI	533016	533017	+	5	Y65B4BM.2
chrI	533017	533018	+	19	Y65B4BM.3
chrI	533017	533018	+	19	Y65B4BM.2
chrI	533018	533019	+	7	Y65B4BM.3
chrI	533018	533019	+	7	Y65B4BM.2
chrI	533024	533025	+	9	Y65B4BM.3
chrI	533024	533025	+	9	Y65B4BM.2
chrI	533042	533043	+	8	Y65B4BM.3
chrI	533048	533049	+	9	Y65B4BM.3
chrI	533049	533050	+	6	Y65B4BM.3
chrI	533050	533051	+	6	Y65B4BM.3
chrI	533062	533063	+	11	Y65B4BM.3
chrI	535333	535334	+	11	Y65B4BR.8
chrI	535336	535337	+	5	Y65B4BR.8
chrI	535338	535339	+	11	Y65B4BR.8
chrI	535339	535340	+	19	Y65B4BR.8
chrI	535340	535341	+	15	Y65B4BR.8
chrI	536218	536219	+	9	Y65B4BR.5
chrI	536291	536292	+	6	Y65B4BR.5
chrI	536296	536297	+	25	Y65B4BR.5
chrI	536297	536298	+	16	Y65B4BR.5
chrI	536298	536299	+	7	Y65B4BR.5
chrI	536299	536300	+	9	Y65B4BR.5
chrI	536300	536301	+	22	Y65B4BR.5
chrI	536301	536302	+	17	Y65B4BR.5
chrI	536303	536304	+	15	Y65B4BR.5
chrI	536304	536305	+	14	Y65B4BR.5
chrI	536305	536306	+	62	Y65B4BR.5
chrI	536306	536307	+	214	Y65B4BR.5
chrI	536309	536310	+	6	Y65B4BR.5
chrI	536313	536314	+	18	Y65B4BR.5
chrI	536409	536410	+	8	Y65B4BR.5
chrI	536414	536415	+	8	Y65B4BR.5
chrI	536435	536436	+	5	Y65B4BR.5
chrI	536446	536447	+	5	Y65B4BR.5
chrI	536449	536450	+	11	Y65B4BR.5
chrI	536451	536452	+	15	Y65B4BR.5
chrI	536453	536454	+	7	Y65B4BR.5
chrI	536458	536459	+	13	Y65B4BR.5
chrI	536459	536460	+	22	Y65B4BR.5
chrI	536460	536461	+	7	Y65B4BR.5
chrI	536461	536462	+	17	Y65B4BR.5
chrI	536464	536465	+	21	Y65B4BR.5
chrI	536465	536466	+	17	Y65B4BR.5
chrI	536468	536469	+	8	Y65B4BR.5
chrI	536470	536471	+	23	Y65B4BR.5
chrI	536472	536473	+	13	Y65B4BR.5
chrI	536473	536474	+	23	Y65B4BR.5
chrI	536474	536475	+	6	Y65B4BR.5
chrI	536476	536477	+	6	Y65B4BR.5
chrI	536477	536478	+	5	Y65B4BR.5
chrI	536480	536481	+	21	Y65B4BR.5
chrI	536481	536482	+	20	Y65B4BR.5
chrI	536482	536483	+	7	Y65B4BR.5
chrI	536483	536484	+	31	Y65B4BR.5
chrI	536485	536486	+	13	Y65B4BR.5
chrI	536486	536487	+	5	Y65B4BR.5
chrI	536489	536490	+	13	Y65B4BR.5
chrI	536490	536491	+	17	Y65B4BR.5
chrI	536492	536493	+	17	Y65B4BR.5
chrI	536494	536495	+	9	Y65B4BR.5
chrI	536495	536496	+	5	Y65B4BR.5
chrI	536498	536499	+	8	Y65B4BR.5
chrI	536499	536500	+	12	Y65B4BR.5
chrI	536506	536507	+	13	Y65B4BR.5
chrI	536507	536508	+	8	Y65B4BR.5
chrI	536508	536509	+	20	Y65B4BR.5
chrI	536509	536510	+	51	Y65B4BR.5
chrI	536510	536511	+	5	Y65B4BR.5
chrI	536511	536512	+	30	Y65B4BR.5
chrI	536512	536513	+	5	Y65B4BR.5
chrI	536516	536517	+	5	Y65B4BR.5
chrI	536517	536518	+	22	Y65B4BR.5
chrI	536518	536519	+	40	Y65B4BR.5
chrI	536520	536521	+	51	Y65B4BR.5
chrI	536521	536522	+	78	Y65B4BR.5
chrI	536522	536523	+	11	Y65B4BR.5
chrI	536523	536524	+	5	Y65B4BR.5
chrI	536527	536528	+	8	Y65B4BR.5
chrI	536528	536529	+	33	Y65B4BR.5
chrI	536529	536530	+	6	Y65B4BR.5
chrI	536532	536533	+	7	Y65B4BR.5
chrI	536534	536535	+	7	Y65B4BR.5
chrI	536536	536537	+	36	Y65B4BR.5
chrI	536538	536539	+	7	Y65B4BR.5
chrI	536540	536541	+	5	Y65B4BR.5
chrI	536546	536547	+	6	Y65B4BR.5
chrI	536549	536550	+	33	Y65B4BR.5
chrI	536550	536551	+	14	Y65B4BR.5
chrI	536551	536552	+	6	Y65B4BR.5
chrI	536552	536553	+	5	Y65B4BR.5
chrI	536553	536554	+	28	Y65B4BR.5
chrI	536554	536555	+	68	Y65B4BR.5
chrI	536555	536556	+	10	Y65B4BR.5
chrI	536556	536557	+	7	Y65B4BR.5
chrI	536557	536558	+	21	Y65B4BR.5
chrI	536559	536560	+	6	Y65B4BR.5
chrI	536560	536561	+	9	Y65B4BR.5
chrI	536561	536562	+	16	Y65B4BR.5
chrI	536562	536563	+	33	Y65B4BR.5
chrI	536563	536564	+	40	Y65B4BR.5
chrI	536564	536565	+	6	Y65B4BR.5
chrI	536565	536566	+	10	Y65B4BR.5
chrI	536567	536568	+	43	Y65B4BR.5
chrI	536568	536569	+	302	Y65B4BR.5
chrI	536569	536570	+	19	Y65B4BR.5
chrI	536570	536571	+	55	Y65B4BR.5
chrI	536571	536572	+	20	Y65B4BR.5
chrI	536572	536573	+	73	Y65B4BR.5
chrI	536573	536574	+	296	Y65B4BR.5
chrI	536574	536575	+	63	Y65B4BR.5
chrI	536575	536576	+	130	Y65B4BR.5
chrI	536576	536577	+	74	Y65B4BR.5
chrI	536577	536578	+	101	Y65B4BR.5
chrI	536578	536579	+	26	Y65B4BR.5
chrI	536579	536580	+	51	Y65B4BR.5
chrI	536580	536581	+	1754	Y65B4BR.5
chrI	536581	536582	+	203	Y65B4BR.5
chrI	536582	536583	+	195	Y65B4BR.5
chrI	536583	536584	+	506	Y65B4BR.5
chrI	536584	536585	+	405	Y65B4BR.5
chrI	536585	536586	+	87	Y65B4BR.5
chrI	536586	536587	+	44	Y65B4BR.5
chrI	536587	536588	+	9	Y65B4BR.5
chrI	536589	536590	+	255	Y65B4BR.5
chrI	536590	536591	+	5	Y65B4BR.5
chrI	536591	536592	+	5	Y65B4BR.5
chrI	536592	536593	+	5	Y65B4BR.5
chrI	536593	536594	+	14	Y65B4BR.5
chrI	536594	536595	+	7	Y65B4BR.5
chrI	536607	536608	+	6	Y65B4BR.5
chrI	536608	536609	+	5	Y65B4BR.5
chrI	536609	536610	+	26	Y65B4BR.5
chrI	536610	536611	+	5	Y65B4BR.5
chrI	536615	536616	+	9	Y65B4BR.5
chrI	536617	536618	+	15	Y65B4BR.5
chrI	536619	536620	+	5	Y65B4BR.5
chrI	536620	536621	+	11	Y65B4BR.5
chrI	536621	536622	+	20	Y65B4BR.5
chrI	536627	536628	+	63	Y65B4BR.5
chrI	536628	536629	+	16	Y65B4BR.5
chrI	536659	536660	+	9	Y65B4BR.5
chrI	536663	536664	+	8	Y65B4BR.5
chrI	574649	574650	-	5	Y65B4BR.6
chrI	575071	575072	-	6	Y65B4BR.6
chrI	575081	575082	-	7	Y65B4BR.6
chrI	575088	575089	-	5	Y65B4BR.6
chrI	575089	575090	-	5	Y65B4BR.6
chrI	575090	575091	-	14	Y65B4BR.6
chrI	575091	575092	-	5	Y65B4BR.6
chrI	575094	575095	-	15	Y65B4BR.6
chrI	575095	575096	-	11	Y65B4BR.6
chrI	575097	575098	-	7	Y65B4BR.6
chrI	575099	575100	-	15	Y65B4BR.6
chrI	575100	575101	-	11	Y65B4BR.6
chrI	575101	575102	-	10	Y65B4BR.6
chrI	575102	575103	-	12	Y65B4BR.6
chrI	621450	621451	+	9	F56A6.1
chrI	621450	621451	+	9	F56A6.4
chrI	621452	621453	+	8	F56A6.1
chrI	621452	621453	+	8	F56A6.4
chrI	621457	621458	+	14	F56A6.1
chrI	621457	621458	+	14	F56A6.4
chrI	621458	621459	+	26	F56A6.1
chrI	621458	621459	+	26	F56A6.4
chrI	621462	621463	+	18	F56A6.1
chrI	621462	621463	+	18	F56A6.4
chrI	621463	621464	+	43	F56A6.1
chrI	621463	621464	+	43	F56A6.4
chrI	621464	621465	+	11	F56A6.1
chrI	621464	621465	+	11	F56A6.4
chrI	621465	621466	+	5	F56A6.1
chrI	621465	621466	+	5	F56A6.4
chrI	621468	621469	+	8	F56A6.1
chrI	621468	621469	+	8	F56A6.4
chrI	621469	621470	+	6	F56A6.1
chrI	621469	621470	+	6	F56A6.4
chrI	621472	621473	+	20	F56A6.1
chrI	621472	621473	+	20	F56A6.4
chrI	621481	621482	+	11	F56A6.1
chrI	621481	621482	+	11	F56A6.4
chrI	621482	621483	+	10	F56A6.1
chrI	621482	621483	+	10	F56A6.4
chrI	621485	621486	+	12	F56A6.1
chrI	621485	621486	+	12	F56A6.4
chrI	629938	629939	-	6	Y65B4A.6
chrI	637696	637697	+	7	Y65B4A.3
chrI	637702	637703	+	38	Y65B4A.3
chrI	637703	637704	+	28	Y65B4A.3
chrI	637704	637705	+	5	Y65B4A.3
chrI	637705	637706	+	9	Y65B4A.3
chrI	637806	637807	+	5	Y65B4A.3
chrI	637808	637809	+	6	Y65B4A.3
chrI	637814	637815	+	5	Y65B4A.3
chrI	637829	637830	+	5	Y65B4A.3
chrI	637830	637831	+	13	Y65B4A.3
chrI	637834	637835	+	20	Y65B4A.3
chrI	637836	637837	+	11	Y65B4A.3
chrI	637837	637838	+	21	Y65B4A.3
chrI	637839	637840	+	7	Y65B4A.3
chrI	637842	637843	+	24	Y65B4A.3
chrI	637843	637844	+	45	Y65B4A.3
chrI	637844	637845	+	33	Y65B4A.3
chrI	637846	637847	+	8	Y65B4A.3
chrI	637847	637848	+	22	Y65B4A.3
chrI	637848	637849	+	6	Y65B4A.3
chrI	637850	637851	+	16	Y65B4A.3
chrI	658674	658675	+	7	Y65B4A.1
chrI	658681	658682	+	11	Y65B4A.1
chrI	658682	658683	+	6	Y65B4A.1
chrI	693845	693846	-	11	Y18H1A.4
chrI	693846	693847	-	6	Y18H1A.4
chrI	693847	693848	-	31	Y18H1A.4
chrI	694631	694632	-	5	Y18H1A.4
chrI	694632	694633	-	9	Y18H1A.4
chrI	694642	694643	-	6	Y18H1A.4
chrI	694646	694647	-	8	Y18H1A.4
chrI	694651	694652	-	75	Y18H1A.4
chrI	694652	694653	-	6	Y18H1A.4
chrI	694655	694656	-	8	Y18H1A.4
chrI	715872	715873	-	14	Y18H1A.3
chrI	719686	719687	-	5	Y18H1A.7
chrI	730992	730993	+	5	Y18H1A.6
chrI	731067	731068	+	6	Y18H1A.6
chrI	731067	731068	+	6	Y18H1A.15
chrI	731071	731072	+	9	Y18H1A.6
chrI	731071	731072	+	9	Y18H1A.15
chrI	731072	731073	+	5	Y18H1A.6
chrI	731072	731073	+	5	Y18H1A.15
chrI	731076	731077	+	7	Y18H1A.15
chrI	731076	731077	+	7	Y18H1A.6
chrI	761716	761717	-	5	T06A4.2
chrI	770643	770644	+	6	T06A4.3
chrI	770655	770656	+	5	T06A4.3
chrI	841564	841565	+	7	ZC123.1
chrI	841579	841580	+	17	ZC123.1
chrI	841731	841732	+	9	ZC123.1
chrI	841737	841738	+	6	ZC123.1
chrI	841746	841747	+	10	ZC123.4
chrI	890209	890210	+	5	Y95B8A.11
chrI	941770	941771	+	5	Y95B8A.2
chrI	969341	969342	-	5	F54A5.3
chrI	973120	973121	-	7	F54A5.3
chrI	973121	973122	-	11	F54A5.3
chrI	973122	973123	-	7	F54A5.3
chrI	973123	973124	-	5	F54A5.3
chrI	992176	992177	+	6	F54A5.1
chrI	1014341	1014342	-	7	C54G6.1
chrI	1017093	1017094	+	5	C54G6.5
chrI	1017113	1017114	+	7	C54G6.5
chrI	1017139	1017140	+	5	C54G6.5
chrI	1017143	1017144	+	5	C54G6.5
chrI	1017144	1017145	+	31	C54G6.5
chrI	1017145	1017146	+	24	C54G6.5
chrI	1017151	1017152	+	17	C54G6.5
chrI	1017152	1017153	+	10	C54G6.5
chrI	1017153	1017154	+	15	C54G6.5
chrI	1017159	1017160	+	8	C54G6.5
chrI	1017162	1017163	+	26	C54G6.5
chrI	1017163	1017164	+	234	C54G6.5
chrI	1017164	1017165	+	106	C54G6.5
chrI	1017167	1017168	+	5	C54G6.5
chrI	1017168	1017169	+	84	C54G6.5
chrI	1017169	1017170	+	39	C54G6.5
chrI	1017170	1017171	+	43	C54G6.5
chrI	1017172	1017173	+	39	C54G6.5
chrI	1017177	1017178	+	19	C54G6.5
chrI	1017178	1017179	+	276	C54G6.5
chrI	1029881	1029882	-	5	Y34D9A.1
chrI	1029896	1029897	-	5	Y34D9A.1
chrI	1029904	1029905	-	6	Y34D9A.1
chrI	1029908	1029909	-	23	Y34D9A.1
chrI	1033426	1033427	-	5	Y34D9A.4
chrI	1033429	1033430	-	7	Y34D9A.4
chrI	1040836	1040837	+	6	Y34D9A.3
chrI	1040849	1040850	+	11	Y34D9A.3
chrI	1040850	1040851	+	9	Y34D9A.3
chrI	1040859	1040860	+	5	Y34D9A.3
chrI	1040866	1040867	+	7	Y34D9A.3
chrI	1042143	1042144	+	32	Y34D9A.7
chrI	1050649	1050650	+	7	Y34D9A.6
chrI	1050651	1050652	+	6	Y34D9A.6
chrI	1050657	1050658	+	6	Y34D9A.6
chrI	1050667	1050668	+	6	Y34D9A.6
chrI	1050678	1050679	+	8	Y34D9A.6
chrI	1050679	1050680	+	9	Y34D9A.6
chrI	1050680	1050681	+	11	Y34D9A.6
chrI	1050704	1050705	+	24	Y34D9A.6
chrI	1050706	1050707	+	6	Y34D9A.6
chrI	1050707	1050708	+	10	Y34D9A.6
chrI	1050713	1050714	+	9	Y34D9A.6
chrI	1050718	1050719	+	20	Y34D9A.6
chrI	1050719	1050720	+	10	Y34D9A.6
chrI	1050721	1050722	+	6	Y34D9A.6
chrI	1050722	1050723	+	114	Y34D9A.6
chrI	1050723	1050724	+	6	Y34D9A.6
chrI	1050724	1050725	+	9	Y34D9A.6
chrI	1050725	1050726	+	32	Y34D9A.6
chrI	1053449	1053450	+	24	Y34D9A.8
chrI	1066770	1066771	-	5	Y34D9A.10
chrI	1088546	1088547	+	5	R06A10.5
chrI	1154384	1154385	-	7	Y48G8AL.10
chrI	1155005	1155006	-	11	Y48G8AL.14
chrI	1156835	1156836	+	5	Y48G8AL.8
chrI	1156860	1156861	+	5	Y48G8AL.8
chrI	1156861	1156862	+	5	Y48G8AL.8
chrI	1156862	1156863	+	7	Y48G8AL.8
chrI	1156871	1156872	+	6	Y48G8AL.8
chrI	1156872	1156873	+	5	Y48G8AL.8
chrI	1156873	1156874	+	15	Y48G8AL.8
chrI	1156874	1156875	+	19	Y48G8AL.8
chrI	1156880	1156881	+	7	Y48G8AL.8
chrI	1156889	1156890	+	43	Y48G8AL.8
chrI	1157046	1157047	+	5	Y48G8AL.8
chrI	1157066	1157067	+	5	Y48G8AL.8
chrI	1157068	1157069	+	10	Y48G8AL.8
chrI	1157070	1157071	+	6	Y48G8AL.8
chrI	1157085	1157086	+	5	Y48G8AL.8
chrI	1157087	1157088	+	5	Y48G8AL.8
chrI	1157088	1157089	+	65	Y48G8AL.8
chrI	1157089	1157090	+	22	Y48G8AL.8
chrI	1157091	1157092	+	52	Y48G8AL.8
chrI	1157093	1157094	+	45	Y48G8AL.8
chrI	1157094	1157095	+	404	Y48G8AL.8
chrI	1157096	1157097	+	8	Y48G8AL.8
chrI	1157334	1157335	+	8	Y48G8AL.8
chrI	1157340	1157341	+	6	Y48G8AL.8
chrI	1157342	1157343	+	5	Y48G8AL.8
chrI	1157350	1157351	+	7	Y48G8AL.8
chrI	1157351	1157352	+	22	Y48G8AL.8
chrI	1157353	1157354	+	7	Y48G8AL.8
chrI	1157354	1157355	+	10	Y48G8AL.8
chrI	1157371	1157372	+	7	Y48G8AL.8
chrI	1157379	1157380	+	9	Y48G8AL.8
chrI	1157380	1157381	+	31	Y48G8AL.8
chrI	1157382	1157383	+	11	Y48G8AL.8
chrI	1157383	1157384	+	20	Y48G8AL.8
chrI	1157384	1157385	+	8	Y48G8AL.8
chrI	1157386	1157387	+	6	Y48G8AL.8
chrI	1157387	1157388	+	7	Y48G8AL.8
chrI	1157390	1157391	+	38	Y48G8AL.8
chrI	1157391	1157392	+	20	Y48G8AL.8
chrI	1157392	1157393	+	18	Y48G8AL.8
chrI	1157393	1157394	+	30	Y48G8AL.8
chrI	1157394	1157395	+	23	Y48G8AL.8
chrI	1157395	1157396	+	52	Y48G8AL.8
chrI	1157396	1157397	+	9	Y48G8AL.8
chrI	1157397	1157398	+	5	Y48G8AL.8
chrI	1157398	1157399	+	13	Y48G8AL.8
chrI	1157400	1157401	+	16	Y48G8AL.8
chrI	1157402	1157403	+	17	Y48G8AL.8
chrI	1157403	1157404	+	249	Y48G8AL.8
chrI	1157404	1157405	+	42	Y48G8AL.8
chrI	1157405	1157406	+	54	Y48G8AL.8
chrI	1157406	1157407	+	9	Y48G8AL.8
chrI	1157407	1157408	+	23	Y48G8AL.8
chrI	1157408	1157409	+	58	Y48G8AL.8
chrI	1157409	1157410	+	65	Y48G8AL.8
chrI	1157410	1157411	+	5	Y48G8AL.8
chrI	1157411	1157412	+	11	Y48G8AL.8
chrI	1157412	1157413	+	23	Y48G8AL.8
chrI	1157413	1157414	+	46	Y48G8AL.8
chrI	1157414	1157415	+	204	Y48G8AL.8
chrI	1157415	1157416	+	129	Y48G8AL.8
chrI	1157416	1157417	+	19	Y48G8AL.8
chrI	1157417	1157418	+	9	Y48G8AL.8
chrI	1157421	1157422	+	6	Y48G8AL.8
chrI	1157422	1157423	+	298	Y48G8AL.8
chrI	1157423	1157424	+	45	Y48G8AL.8
chrI	1157424	1157425	+	24	Y48G8AL.8
chrI	1157425	1157426	+	306	Y48G8AL.8
chrI	1157426	1157427	+	165	Y48G8AL.8
chrI	1157427	1157428	+	47	Y48G8AL.8
chrI	1157428	1157429	+	13	Y48G8AL.8
chrI	1157429	1157430	+	31	Y48G8AL.8
chrI	1157430	1157431	+	60	Y48G8AL.8
chrI	1157431	1157432	+	7	Y48G8AL.8
chrI	1157432	1157433	+	35	Y48G8AL.8
chrI	1157433	1157434	+	52	Y48G8AL.8
chrI	1157434	1157435	+	92	Y48G8AL.8
chrI	1157435	1157436	+	88	Y48G8AL.8
chrI	1157436	1157437	+	209	Y48G8AL.8
chrI	1157437	1157438	+	45	Y48G8AL.8
chrI	1157438	1157439	+	93	Y48G8AL.8
chrI	1157439	1157440	+	63	Y48G8AL.8
chrI	1157440	1157441	+	128	Y48G8AL.8
chrI	1157441	1157442	+	579	Y48G8AL.8
chrI	1157442	1157443	+	455	Y48G8AL.8
chrI	1157443	1157444	+	115	Y48G8AL.8
chrI	1157444	1157445	+	59	Y48G8AL.8
chrI	1157445	1157446	+	47	Y48G8AL.8
chrI	1157446	1157447	+	844	Y48G8AL.8
chrI	1157447	1157448	+	539	Y48G8AL.8
chrI	1157448	1157449	+	737	Y48G8AL.8
chrI	1157449	1157450	+	233	Y48G8AL.8
chrI	1157450	1157451	+	5513	Y48G8AL.8
chrI	1157451	1157452	+	1997	Y48G8AL.8
chrI	1157452	1157453	+	48	Y48G8AL.8
chrI	1157455	1157456	+	100	Y48G8AL.8
chrI	1157460	1157461	+	8	Y48G8AL.8
chrI	1157463	1157464	+	14	Y48G8AL.8
chrI	1162894	1162895	+	7	Y48G8AL.7
chrI	1162894	1162895	+	7	Y48G8AL.11
chrI	1162898	1162899	+	7	Y48G8AL.7
chrI	1162898	1162899	+	7	Y48G8AL.11
chrI	1162917	1162918	+	5	Y48G8AL.7
chrI	1162917	1162918	+	5	Y48G8AL.11
chrI	1162918	1162919	+	15	Y48G8AL.7
chrI	1162918	1162919	+	15	Y48G8AL.11
chrI	1162925	1162926	+	14	Y48G8AL.7
chrI	1162925	1162926	+	14	Y48G8AL.11
chrI	1164202	1164203	+	9	Y48G8AL.11
chrI	1164887	1164888	+	168	Y48G8AL.11
chrI	1172306	1172307	+	7	Y48G8AL.11
chrI	1175797	1175798	-	5	Y48G8AL.11
chrI	1183624	1183625	+	18	Y48G8AL.6
chrI	1183625	1183626	+	8	Y48G8AL.6
chrI	1190103	1190104	+	5	Y48G8AL.20
chrI	1190103	1190104	+	5	Y48G8AL.6
chrI	1190825	1190826	+	13	Y48G8AL.20
chrI	1190825	1190826	+	13	Y48G8AL.6
chrI	1211375	1211376	+	11	Y48G8AL.5
chrI	1211376	1211377	+	7	Y48G8AL.5
chrI	1211377	1211378	+	6	Y48G8AL.5
chrI	1224334	1224335	-	5	Y48G8AL.13
chrI	1224334	1224335	-	5	Y48G8AL.1
chrI	1225536	1225537	-	5	Y48G8AL.13
chrI	1225536	1225537	-	5	Y48G8AL.1
chrI	1226803	1226804	-	24	Y48G8AL.13
chrI	1226803	1226804	-	24	Y48G8AL.1
chrI	1226808	1226809	-	13	Y48G8AL.13
chrI	1226808	1226809	-	13	Y48G8AL.1
chrI	1226809	1226810	-	64	Y48G8AL.13
chrI	1226809	1226810	-	64	Y48G8AL.1
chrI	1226811	1226812	-	92	Y48G8AL.13
chrI	1226811	1226812	-	92	Y48G8AL.1
chrI	1226812	1226813	-	17	Y48G8AL.13
chrI	1226812	1226813	-	17	Y48G8AL.1
chrI	1226813	1226814	-	120	Y48G8AL.13
chrI	1226813	1226814	-	120	Y48G8AL.1
chrI	1226815	1226816	-	14	Y48G8AL.13
chrI	1226815	1226816	-	14	Y48G8AL.1
chrI	1258160	1258161	+	5	Y48G8AL.15
chrI	1258168	1258169	+	17	Y48G8AL.15
chrI	1258214	1258215	+	5	Y48G8AL.15
chrI	1338208	1338209	+	6	K12C11.6
chrI	1339746	1339747	+	8	K12C11.7
chrI	1339766	1339767	+	9	K12C11.7
chrI	1340924	1340925	+	6	K12C11.2
chrI	1341084	1341085	+	6	K12C11.2
chrI	1341108	1341109	+	16	K12C11.2
chrI	1341109	1341110	+	10	K12C11.2
chrI	1341113	1341114	+	13	K12C11.2
chrI	1341115	1341116	+	7	K12C11.2
chrI	1341118	1341119	+	8	K12C11.2
chrI	1341121	1341122	+	6	K12C11.2
chrI	1341122	1341123	+	8	K12C11.2
chrI	1341124	1341125	+	5	K12C11.2
chrI	1341125	1341126	+	7	K12C11.2
chrI	1341126	1341127	+	8	K12C11.2
chrI	1341127	1341128	+	10	K12C11.2
chrI	1341130	1341131	+	12	K12C11.2
chrI	1341131	1341132	+	7	K12C11.2
chrI	1341134	1341135	+	10	K12C11.2
chrI	1341137	1341138	+	5	K12C11.2
chrI	1341139	1341140	+	14	K12C11.2
chrI	1341142	1341143	+	11	K12C11.2
chrI	1341143	1341144	+	5	K12C11.2
chrI	1341145	1341146	+	8	K12C11.2
chrI	1341146	1341147	+	6	K12C11.2
chrI	1341150	1341151	+	6	K12C11.2
chrI	1341151	1341152	+	10	K12C11.2
chrI	1341153	1341154	+	15	K12C11.2
chrI	1341157	1341158	+	7	K12C11.2
chrI	1341167	1341168	+	7	K12C11.2
chrI	1341173	1341174	+	8	K12C11.2
chrI	1341177	1341178	+	6	K12C11.2
chrI	1341187	1341188	+	9	K12C11.2
chrI	1341190	1341191	+	6	K12C11.2
chrI	1341191	1341192	+	6	K12C11.2
chrI	1341192	1341193	+	5	K12C11.2
chrI	1341195	1341196	+	7	K12C11.2
chrI	1341197	1341198	+	6	K12C11.2
chrI	1341198	1341199	+	7	K12C11.2
chrI	1341199	1341200	+	14	K12C11.2
chrI	1341203	1341204	+	5	K12C11.2
chrI	1341204	1341205	+	6	K12C11.2
chrI	1341205	1341206	+	12	K12C11.2
chrI	1341211	1341212	+	9	K12C11.2
chrI	1341213	1341214	+	5	K12C11.2
chrI	1341214	1341215	+	12	K12C11.2
chrI	1341215	1341216	+	6	K12C11.2
chrI	1341216	1341217	+	8	K12C11.2
chrI	1341217	1341218	+	21	K12C11.2
chrI	1341217	1341218	+	21	K12C11.1
chrI	1341218	1341219	+	9	K12C11.2
chrI	1341218	1341219	+	9	K12C11.1
chrI	1341220	1341221	+	20	K12C11.2
chrI	1341220	1341221	+	20	K12C11.1
chrI	1341221	1341222	+	7	K12C11.2
chrI	1341221	1341222	+	7	K12C11.1
chrI	1341222	1341223	+	9	K12C11.2
chrI	1341222	1341223	+	9	K12C11.1
chrI	1341223	1341224	+	18	K12C11.2
chrI	1341223	1341224	+	18	K12C11.1
chrI	1341224	1341225	+	23	K12C11.2
chrI	1341224	1341225	+	23	K12C11.1
chrI	1341225	1341226	+	23	K12C11.2
chrI	1341225	1341226	+	23	K12C11.1
chrI	1341226	1341227	+	6	K12C11.2
chrI	1341226	1341227	+	6	K12C11.1
chrI	1341227	1341228	+	39	K12C11.2
chrI	1341227	1341228	+	39	K12C11.1
chrI	1341228	1341229	+	17	K12C11.2
chrI	1341228	1341229	+	17	K12C11.1
chrI	1341231	1341232	+	6	K12C11.2
chrI	1341231	1341232	+	6	K12C11.1
chrI	1341232	1341233	+	7	K12C11.2
chrI	1341232	1341233	+	7	K12C11.1
chrI	1341233	1341234	+	5	K12C11.2
chrI	1341233	1341234	+	5	K12C11.1
chrI	1341234	1341235	+	19	K12C11.2
chrI	1341234	1341235	+	19	K12C11.1
chrI	1341235	1341236	+	10	K12C11.2
chrI	1341235	1341236	+	10	K12C11.1
chrI	1341236	1341237	+	5	K12C11.2
chrI	1341236	1341237	+	5	K12C11.1
chrI	1341238	1341239	+	27	K12C11.2
chrI	1341238	1341239	+	27	K12C11.1
chrI	1341239	1341240	+	27	K12C11.2
chrI	1341239	1341240	+	27	K12C11.1
chrI	1341240	1341241	+	5	K12C11.2
chrI	1341240	1341241	+	5	K12C11.1
chrI	1341241	1341242	+	152	K12C11.2
chrI	1341241	1341242	+	152	K12C11.1
chrI	1341242	1341243	+	33	K12C11.2
chrI	1341242	1341243	+	33	K12C11.1
chrI	1341243	1341244	+	20	K12C11.2
chrI	1341243	1341244	+	20	K12C11.1
chrI	1341244	1341245	+	39	K12C11.2
chrI	1341244	1341245	+	39	K12C11.1
chrI	1341246	1341247	+	12	K12C11.2
chrI	1341246	1341247	+	12	K12C11.1
chrI	1341248	1341249	+	38	K12C11.2
chrI	1341248	1341249	+	38	K12C11.1
chrI	1341249	1341250	+	71	K12C11.2
chrI	1341249	1341250	+	71	K12C11.1
chrI	1341250	1341251	+	17	K12C11.2
chrI	1341250	1341251	+	17	K12C11.1
chrI	1341251	1341252	+	6	K12C11.2
chrI	1341251	1341252	+	6	K12C11.1
chrI	1341252	1341253	+	8	K12C11.2
chrI	1341252	1341253	+	8	K12C11.1
chrI	1341255	1341256	+	48	K12C11.2
chrI	1341255	1341256	+	48	K12C11.1
chrI	1341256	1341257	+	68	K12C11.2
chrI	1341256	1341257	+	68	K12C11.1
chrI	1341257	1341258	+	152	K12C11.1
chrI	1341258	1341259	+	114	K12C11.1
chrI	1341259	1341260	+	14	K12C11.1
chrI	1341260	1341261	+	31	K12C11.1
chrI	1341261	1341262	+	324	K12C11.1
chrI	1341262	1341263	+	311	K12C11.1
chrI	1341263	1341264	+	39	K12C11.1
chrI	1341264	1341265	+	27	K12C11.1
chrI	1341265	1341266	+	42	K12C11.1
chrI	1341266	1341267	+	34	K12C11.1
chrI	1341268	1341269	+	9	K12C11.1
chrI	1341273	1341274	+	5	K12C11.1
chrI	1344684	1344685	-	15	K12C11.1
chrI	1344685	1344686	-	8	K12C11.1
chrI	1383309	1383310	+	8	Y92H12BL.4
chrI	1413097	1413098	+	8	Y92H12BR.6
chrI	1415488	1415489	-	5	Y92H12BR.2
chrI	1415648	1415649	-	25	Y92H12BR.2
chrI	1415783	1415784	-	6	Y92H12BR.2
chrI	1415794	1415795	-	9	Y92H12BR.2
chrI	1415795	1415796	-	7	Y92H12BR.2
chrI	1415805	1415806	-	52	Y92H12BR.2
chrI	1425184	1425185	+	12	Y92H12BR.3
chrI	1425193	1425194	+	6	Y92H12BR.3
chrI	1425194	1425195	+	48	Y92H12BR.3
chrI	1441263	1441264	+	7	Y92H12BR.8
chrI	1441277	1441278	+	10	Y92H12BR.8
chrI	1441300	1441301	+	7	Y92H12BR.8
chrI	1441309	1441310	+	16	Y92H12BR.8
chrI	1441310	1441311	+	18	Y92H12BR.8
chrI	1441311	1441312	+	5	Y92H12BR.8
chrI	1443934	1443935	-	6	F37F2.2
chrI	1443938	1443939	-	7	F37F2.2
chrI	1479916	1479917	+	5	F47G6.2
chrI	1556188	1556189	+	14	Y92H12A.2
chrI	1556192	1556193	+	8	Y92H12A.2
chrI	1556193	1556194	+	10	Y92H12A.2
chrI	1556194	1556195	+	9	Y92H12A.2
chrI	1606832	1606833	+	5	Y73E7A.2
chrI	1606840	1606841	+	7	Y73E7A.2
chrI	1606849	1606850	+	11	Y73E7A.2
chrI	1610037	1610038	-	12	Y73E7A.6
chrI	1610038	1610039	-	11	Y73E7A.6
chrI	1630791	1630792	+	5	Y73E7A.1
chrI	1630793	1630794	+	15	Y73E7A.1
chrI	1633454	1633455	+	5	Y73E7A.1
chrI	1633467	1633468	+	6	Y73E7A.1
chrI	1633470	1633471	+	10	Y73E7A.1
chrI	1633472	1633473	+	14	Y73E7A.1
chrI	1633475	1633476	+	13	Y73E7A.1
chrI	1633479	1633480	+	17	Y73E7A.1
chrI	1633482	1633483	+	10	Y73E7A.1
chrI	1633483	1633484	+	9	Y73E7A.1
chrI	1633484	1633485	+	8	Y73E7A.1
chrI	1633492	1633493	+	5	Y73E7A.1
chrI	1633493	1633494	+	8	Y73E7A.1
chrI	1633495	1633496	+	28	Y73E7A.1
chrI	1643008	1643009	+	7	Y73E7A.8
chrI	1644098	1644099	+	5	Y73E7A.8
chrI	1644105	1644106	+	5	Y73E7A.8
chrI	1649787	1649788	-	7	Y71G12B.20
chrI	1651342	1651343	-	5	Y71G12B.20
chrI	1651349	1651350	-	5	Y71G12B.20
chrI	1651351	1651352	-	13	Y71G12B.20
chrI	1651352	1651353	-	9	Y71G12B.20
chrI	1651353	1651354	-	9	Y71G12B.20
chrI	1651354	1651355	-	31	Y71G12B.20
chrI	1651355	1651356	-	15	Y71G12B.20
chrI	1651358	1651359	-	10	Y71G12B.20
chrI	1651362	1651363	-	9	Y71G12B.20
chrI	1651364	1651365	-	9	Y71G12B.20
chrI	1651366	1651367	-	9	Y71G12B.20
chrI	1669767	1669768	+	5	Y71G12B.17
chrI	1669776	1669777	+	6	Y71G12B.17
chrI	1669784	1669785	+	8	Y71G12B.17
chrI	1669787	1669788	+	7	Y71G12B.17
chrI	1672279	1672280	-	9	Y71G12B.23
chrI	1701041	1701042	+	10	Y71G12B.15
chrI	1701042	1701043	+	16	Y71G12B.15
chrI	1701043	1701044	+	8	Y71G12B.15
chrI	1701044	1701045	+	9	Y71G12B.15
chrI	1701045	1701046	+	13	Y71G12B.15
chrI	1701047	1701048	+	5	Y71G12B.15
chrI	1701049	1701050	+	9	Y71G12B.15
chrI	1701051	1701052	+	5	Y71G12B.15
chrI	1701055	1701056	+	14	Y71G12B.15
chrI	1701056	1701057	+	22	Y71G12B.15
chrI	1701058	1701059	+	11	Y71G12B.15
chrI	1701060	1701061	+	7	Y71G12B.15
chrI	1701062	1701063	+	5	Y71G12B.15
chrI	1701080	1701081	+	10	Y71G12B.15
chrI	1701091	1701092	+	11	Y71G12B.15
chrI	1701094	1701095	+	8	Y71G12B.15
chrI	1701095	1701096	+	8	Y71G12B.15
chrI	1701101	1701102	+	9	Y71G12B.15
chrI	1701102	1701103	+	18	Y71G12B.15
chrI	1701108	1701109	+	12	Y71G12B.15
chrI	1701111	1701112	+	6	Y71G12B.15
chrI	1701115	1701116	+	9	Y71G12B.15
chrI	1701116	1701117	+	10	Y71G12B.15
chrI	1701117	1701118	+	6	Y71G12B.15
chrI	1701118	1701119	+	151	Y71G12B.15
chrI	1701119	1701120	+	6	Y71G12B.15
chrI	1701120	1701121	+	19	Y71G12B.15
chrI	1701121	1701122	+	7	Y71G12B.15
chrI	1701122	1701123	+	23	Y71G12B.15
chrI	1701123	1701124	+	26	Y71G12B.15
chrI	1701124	1701125	+	10	Y71G12B.15
chrI	1701125	1701126	+	14	Y71G12B.15
chrI	1701795	1701796	+	7	Y71G12B.14
chrI	1701796	1701797	+	6	Y71G12B.14
chrI	1701798	1701799	+	12	Y71G12B.14
chrI	1701801	1701802	+	7	Y71G12B.14
chrI	1701802	1701803	+	18	Y71G12B.14
chrI	1701803	1701804	+	21	Y71G12B.14
chrI	1701804	1701805	+	37	Y71G12B.14
chrI	1701805	1701806	+	29	Y71G12B.14
chrI	1701806	1701807	+	9	Y71G12B.14
chrI	1712828	1712829	+	8	Y71G12B.12
chrI	1715502	1715503	+	7	Y71G12B.12
chrI	1715562	1715563	+	7	Y71G12B.12
chrI	1733007	1733008	+	7	Y71G12B.11
chrI	1733015	1733016	+	5	Y71G12B.11
chrI	1733024	1733025	+	8	Y71G12B.11
chrI	1733026	1733027	+	5	Y71G12B.11
chrI	1733031	1733032	+	6	Y71G12B.11
chrI	1733036	1733037	+	5	Y71G12B.11
chrI	1740691	1740692	+	10	Y71G12B.24
chrI	1740694	1740695	+	6	Y71G12B.24
chrI	1740704	1740705	+	6	Y71G12B.24
chrI	1740707	1740708	+	12	Y71G12B.24
chrI	1740730	1740731	+	16	Y71G12B.24
chrI	1751043	1751044	-	6	Y71G12B.24
chrI	1754389	1754390	+	6	Y71G12B.10
chrI	1754390	1754391	+	12	Y71G12B.10
chrI	1754392	1754393	+	9	Y71G12B.10
chrI	1754393	1754394	+	8	Y71G12B.10
chrI	1754394	1754395	+	30	Y71G12B.10
chrI	1754395	1754396	+	24	Y71G12B.10
chrI	1754397	1754398	+	10	Y71G12B.10
chrI	1754399	1754400	+	6	Y71G12B.10
chrI	1754402	1754403	+	32	Y71G12B.10
chrI	1754404	1754405	+	8	Y71G12B.10
chrI	1754406	1754407	+	12	Y71G12B.10
chrI	1754407	1754408	+	21	Y71G12B.10
chrI	1754408	1754409	+	41	Y71G12B.10
chrI	1766385	1766386	+	10	Y71G12B.9
chrI	1766394	1766395	+	12	Y71G12B.9
chrI	1775926	1775927	-	5	Y71G12B.25
chrI	1775926	1775927	-	5	Y71G12B.8
chrI	1775930	1775931	-	15	Y71G12B.25
chrI	1775930	1775931	-	15	Y71G12B.8
chrI	1775931	1775932	-	20	Y71G12B.25
chrI	1775931	1775932	-	20	Y71G12B.8
chrI	1775934	1775935	-	26	Y71G12B.8
chrI	1775938	1775939	-	38	Y71G12B.8
chrI	1796374	1796375	+	6	Y71G12B.6
chrI	1796380	1796381	+	6	Y71G12B.6
chrI	1796381	1796382	+	7	Y71G12B.6
chrI	1796385	1796386	+	5	Y71G12B.6
chrI	1796415	1796416	+	5	Y71G12B.6
chrI	1796417	1796418	+	14	Y71G12B.6
chrI	1796419	1796420	+	6	Y71G12B.6
chrI	1796420	1796421	+	27	Y71G12B.6
chrI	1796421	1796422	+	23	Y71G12B.6
chrI	1796422	1796423	+	7	Y71G12B.6
chrI	1798682	1798683	-	5	Y71G12B.27
chrI	1798684	1798685	-	8	Y71G12B.27
chrI	1811719	1811720	+	5	Y71G12B.4
chrI	1811722	1811723	+	5	Y71G12B.4
chrI	1811730	1811731	+	5	Y71G12B.4
chrI	1811731	1811732	+	12	Y71G12B.4
chrI	1811732	1811733	+	9	Y71G12B.4
chrI	1811735	1811736	+	6	Y71G12B.4
chrI	1811736	1811737	+	7	Y71G12B.4
chrI	1811739	1811740	+	9	Y71G12B.4
chrI	1811740	1811741	+	5	Y71G12B.4
chrI	1811741	1811742	+	15	Y71G12B.4
chrI	1811745	1811746	+	6	Y71G12B.4
chrI	1811747	1811748	+	8	Y71G12B.4
chrI	1811756	1811757	+	8	Y71G12B.4
chrI	1811758	1811759	+	5	Y71G12B.4
chrI	1811759	1811760	+	16	Y71G12B.4
chrI	1811760	1811761	+	18	Y71G12B.4
chrI	1811761	1811762	+	5	Y71G12B.4
chrI	1811765	1811766	+	6	Y71G12B.4
chrI	1811768	1811769	+	44	Y71G12B.4
chrI	1811769	1811770	+	55	Y71G12B.4
chrI	1811770	1811771	+	159	Y71G12B.4
chrI	1811771	1811772	+	7	Y71G12B.4
chrI	1811772	1811773	+	7	Y71G12B.4
chrI	1811773	1811774	+	27	Y71G12B.4
chrI	1811774	1811775	+	80	Y71G12B.4
chrI	1811775	1811776	+	84	Y71G12B.4
chrI	1811776	1811777	+	14	Y71G12B.4
chrI	1811777	1811778	+	5	Y71G12B.4
chrI	1811781	1811782	+	34	Y71G12B.4
chrI	1811783	1811784	+	37	Y71G12B.4
chrI	1811784	1811785	+	5	Y71G12B.4
chrI	1811785	1811786	+	10	Y71G12B.4
chrI	1825880	1825881	+	5	Y71G12B.1
chrI	1825945	1825946	+	7	Y71G12B.1
chrI	1825952	1825953	+	32	Y71G12B.1
chrI	1825954	1825955	+	10	Y71G12B.1
chrI	1825955	1825956	+	19	Y71G12B.1
chrI	1825956	1825957	+	8	Y71G12B.1
chrI	1825957	1825958	+	25	Y71G12B.1
chrI	1832413	1832414	-	5	C53H9.3
chrI	1832417	1832418	-	7	C53H9.3
chrI	1832418	1832419	-	7	C53H9.3
chrI	1832421	1832422	-	16	C53H9.3
chrI	1832422	1832423	-	193	C53H9.3
chrI	1834616	1834617	+	5	C53H9.2
chrI	1834707	1834708	+	6	C53H9.2
chrI	1834713	1834714	+	13	C53H9.2
chrI	1834724	1834725	+	6	C53H9.2
chrI	1834725	1834726	+	16	C53H9.2
chrI	1834726	1834727	+	8	C53H9.2
chrI	1834728	1834729	+	40	C53H9.2
chrI	1834729	1834730	+	13	C53H9.2
chrI	1834733	1834734	+	5	C53H9.2
chrI	1834736	1834737	+	5	C53H9.2
chrI	1834741	1834742	+	10	C53H9.2
chrI	1834742	1834743	+	9	C53H9.2
chrI	1834743	1834744	+	36	C53H9.2
chrI	1834745	1834746	+	69	C53H9.2
chrI	1834748	1834749	+	29	C53H9.2
chrI	1834749	1834750	+	17	C53H9.2
chrI	1834750	1834751	+	17	C53H9.2
chrI	1834752	1834753	+	137	C53H9.2
chrI	1834753	1834754	+	10	C53H9.2
chrI	1834754	1834755	+	14	C53H9.2
chrI	1834755	1834756	+	61	C53H9.2
chrI	1834762	1834763	+	62	C53H9.2
chrI	1835035	1835036	+	5	C53H9.1
chrI	1835045	1835046	+	14	C53H9.1
chrI	1835144	1835145	+	6	C53H9.1
chrI	1835146	1835147	+	7	C53H9.1
chrI	1835148	1835149	+	8	C53H9.1
chrI	1835149	1835150	+	5	C53H9.1
chrI	1835158	1835159	+	11	C53H9.1
chrI	1835162	1835163	+	9	C53H9.1
chrI	1835163	1835164	+	6	C53H9.1
chrI	1835168	1835169	+	17	C53H9.1
chrI	1835178	1835179	+	5	C53H9.1
chrI	1835182	1835183	+	6	C53H9.1
chrI	1835183	1835184	+	19	C53H9.1
chrI	1835184	1835185	+	7	C53H9.1
chrI	1835190	1835191	+	6	C53H9.1
chrI	1835192	1835193	+	7	C53H9.1
chrI	1835194	1835195	+	9	C53H9.1
chrI	1835197	1835198	+	5	C53H9.1
chrI	1835199	1835200	+	7	C53H9.1
chrI	1835200	1835201	+	5	C53H9.1
chrI	1835201	1835202	+	19	C53H9.1
chrI	1835202	1835203	+	12	C53H9.1
chrI	1835203	1835204	+	11	C53H9.1
chrI	1835204	1835205	+	46	C53H9.1
chrI	1835205	1835206	+	19	C53H9.1
chrI	1835206	1835207	+	63	C53H9.1
chrI	1835207	1835208	+	13	C53H9.1
chrI	1835208	1835209	+	6	C53H9.1
chrI	1835209	1835210	+	5	C53H9.1
chrI	1835210	1835211	+	5	C53H9.1
chrI	1835211	1835212	+	13	C53H9.1
chrI	1835213	1835214	+	25	C53H9.1
chrI	1835214	1835215	+	5	C53H9.1
chrI	1835215	1835216	+	70	C53H9.1
chrI	1835216	1835217	+	24	C53H9.1
chrI	1835217	1835218	+	130	C53H9.1
chrI	1835218	1835219	+	5	C53H9.1
chrI	1835219	1835220	+	12	C53H9.1
chrI	1835220	1835221	+	51	C53H9.1
chrI	1835221	1835222	+	9	C53H9.1
chrI	1835224	1835225	+	23	C53H9.1
chrI	1835225	1835226	+	9	C53H9.1
chrI	1835226	1835227	+	44	C53H9.1
chrI	1835228	1835229	+	18	C53H9.1
chrI	1835229	1835230	+	213	C53H9.1
chrI	1835230	1835231	+	53	C53H9.1
chrI	1835231	1835232	+	5	C53H9.1
chrI	1835303	1835304	+	6	C53H9.1
chrI	1835304	1835305	+	7	C53H9.1
chrI	1835312	1835313	+	16	C53H9.1
chrI	1835313	1835314	+	5	C53H9.1
chrI	1835317	1835318	+	5	C53H9.1
chrI	1835324	1835325	+	8	C53H9.1
chrI	1835325	1835326	+	10	C53H9.1
chrI	1835328	1835329	+	13	C53H9.1
chrI	1835329	1835330	+	8	C53H9.1
chrI	1835330	1835331	+	22	C53H9.1
chrI	1835331	1835332	+	8	C53H9.1
chrI	1835332	1835333	+	11	C53H9.1
chrI	1835333	1835334	+	21	C53H9.1
chrI	1835334	1835335	+	14	C53H9.1
chrI	1835335	1835336	+	119	C53H9.1
chrI	1835336	1835337	+	13	C53H9.1
chrI	1835338	1835339	+	22	C53H9.1
chrI	1835339	1835340	+	63	C53H9.1
chrI	1835340	1835341	+	57	C53H9.1
chrI	1835341	1835342	+	25	C53H9.1
chrI	1835342	1835343	+	18	C53H9.1
chrI	1835343	1835344	+	72	C53H9.1
chrI	1835344	1835345	+	7	C53H9.1
chrI	1835346	1835347	+	23	C53H9.1
chrI	1835347	1835348	+	6	C53H9.1
chrI	1835349	1835350	+	16	C53H9.1
chrI	1835351	1835352	+	5	C53H9.1
chrI	1835352	1835353	+	22	C53H9.1
chrI	1835353	1835354	+	71	C53H9.1
chrI	1835356	1835357	+	10	C53H9.1
chrI	1835358	1835359	+	9	C53H9.1
chrI	1835361	1835362	+	22	C53H9.1
chrI	1835362	1835363	+	8	C53H9.1
chrI	1835363	1835364	+	73	C53H9.1
chrI	1835364	1835365	+	45	C53H9.1
chrI	1835365	1835366	+	6	C53H9.1
chrI	1835366	1835367	+	89	C53H9.1
chrI	1835367	1835368	+	52	C53H9.1
chrI	1835368	1835369	+	67	C53H9.1
chrI	1835369	1835370	+	26	C53H9.1
chrI	1835370	1835371	+	21	C53H9.1
chrI	1835371	1835372	+	523	C53H9.1
chrI	1835372	1835373	+	150	C53H9.1
chrI	1835373	1835374	+	39	C53H9.1
chrI	1835374	1835375	+	75	C53H9.1
chrI	1835375	1835376	+	132	C53H9.1
chrI	1835376	1835377	+	75	C53H9.1
chrI	1835378	1835379	+	19	C53H9.1
chrI	1835379	1835380	+	12	C53H9.1
chrI	1835380	1835381	+	26	C53H9.1
chrI	1835381	1835382	+	14	C53H9.1
chrI	1835382	1835383	+	28	C53H9.1
chrI	1835383	1835384	+	92	C53H9.1
chrI	1835384	1835385	+	162	C53H9.1
chrI	1835385	1835386	+	11	C53H9.1
chrI	1835386	1835387	+	9	C53H9.1
chrI	1835387	1835388	+	55	C53H9.1
chrI	1835388	1835389	+	153	C53H9.1
chrI	1835389	1835390	+	248	C53H9.1
chrI	1835390	1835391	+	28	C53H9.1
chrI	1835391	1835392	+	25	C53H9.1
chrI	1835392	1835393	+	100	C53H9.1
chrI	1835393	1835394	+	129	C53H9.1
chrI	1835394	1835395	+	42	C53H9.1
chrI	1835395	1835396	+	239	C53H9.1
chrI	1835396	1835397	+	86	C53H9.1
chrI	1835397	1835398	+	74	C53H9.1
chrI	1835398	1835399	+	16	C53H9.1
chrI	1835399	1835400	+	8	C53H9.1
chrI	1835400	1835401	+	30	C53H9.1
chrI	1835401	1835402	+	97	C53H9.1
chrI	1835402	1835403	+	170	C53H9.1
chrI	1835403	1835404	+	130	C53H9.1
chrI	1835404	1835405	+	46	C53H9.1
chrI	1835405	1835406	+	29	C53H9.1
chrI	1835406	1835407	+	10	C53H9.1
chrI	1835407	1835408	+	16	C53H9.1
chrI	1835409	1835410	+	11	C53H9.1
chrI	1835410	1835411	+	13	C53H9.1
chrI	1835411	1835412	+	174	C53H9.1
chrI	1835412	1835413	+	258	C53H9.1
chrI	1835413	1835414	+	40	C53H9.1
chrI	1835414	1835415	+	155	C53H9.1
chrI	1835415	1835416	+	14	C53H9.1
chrI	1835416	1835417	+	105	C53H9.1
chrI	1835417	1835418	+	99	C53H9.1
chrI	1835418	1835419	+	15	C53H9.1
chrI	1835419	1835420	+	22	C53H9.1
chrI	1835420	1835421	+	30	C53H9.1
chrI	1835421	1835422	+	142	C53H9.1
chrI	1835422	1835423	+	172	C53H9.1
chrI	1835423	1835424	+	760	C53H9.1
chrI	1835424	1835425	+	618	C53H9.1
chrI	1835425	1835426	+	1309	C53H9.1
chrI	1835426	1835427	+	171	C53H9.1
chrI	1835427	1835428	+	688	C53H9.1
chrI	1835428	1835429	+	507	C53H9.1
chrI	1835429	1835430	+	410	C53H9.1
chrI	1835430	1835431	+	2084	C53H9.1
chrI	1835431	1835432	+	443	C53H9.1
chrI	1835432	1835433	+	72	C53H9.1
chrI	1835433	1835434	+	283	C53H9.1
chrI	1835434	1835435	+	2225	C53H9.1
chrI	1835435	1835436	+	91	C53H9.1
chrI	1835436	1835437	+	762	C53H9.1
chrI	1835437	1835438	+	79	C53H9.1
chrI	1842922	1842923	+	8	M01D7.6
chrI	1843101	1843102	+	6	M01D7.6
chrI	1843152	1843153	+	6	M01D7.6
chrI	1843153	1843154	+	7	M01D7.6
chrI	1843160	1843161	+	8	M01D7.6
chrI	1843209	1843210	+	13	M01D7.6
chrI	1843214	1843215	+	6	M01D7.6
chrI	1843220	1843221	+	55	M01D7.6
chrI	1843221	1843222	+	14	M01D7.6
chrI	1843222	1843223	+	16	M01D7.6
chrI	1843223	1843224	+	76	M01D7.6
chrI	1843225	1843226	+	16	M01D7.6
chrI	1843779	1843780	+	8	M01D7.5
chrI	1843780	1843781	+	6	M01D7.5
chrI	1843783	1843784	+	8	M01D7.5
chrI	1843808	1843809	+	6	M01D7.5
chrI	1843809	1843810	+	5	M01D7.5
chrI	1843815	1843816	+	5	M01D7.5
chrI	1843820	1843821	+	9	M01D7.5
chrI	1843821	1843822	+	10	M01D7.5
chrI	1843824	1843825	+	13	M01D7.5
chrI	1843830	1843831	+	5	M01D7.5
chrI	1843833	1843834	+	10	M01D7.5
chrI	1843841	1843842	+	13	M01D7.5
chrI	1843842	1843843	+	7	M01D7.5
chrI	1843847	1843848	+	5	M01D7.5
chrI	1843848	1843849	+	7	M01D7.5
chrI	1843856	1843857	+	6	M01D7.5
chrI	1843857	1843858	+	12	M01D7.5
chrI	1843861	1843862	+	10	M01D7.5
chrI	1843863	1843864	+	10	M01D7.5
chrI	1843867	1843868	+	5	M01D7.5
chrI	1843874	1843875	+	18	M01D7.5
chrI	1843876	1843877	+	7	M01D7.5
chrI	1843877	1843878	+	8	M01D7.5
chrI	1843878	1843879	+	16	M01D7.5
chrI	1843884	1843885	+	7	M01D7.5
chrI	1843885	1843886	+	32	M01D7.5
chrI	1843889	1843890	+	20	M01D7.5
chrI	1843895	1843896	+	16	M01D7.5
chrI	1843896	1843897	+	11	M01D7.5
chrI	1843897	1843898	+	12	M01D7.5
chrI	1850511	1850512	+	15	M01D7.4
chrI	1850519	1850520	+	13	M01D7.4
chrI	1871053	1871054	-	7	M01D7.2
chrI	1871060	1871061	-	10	M01D7.2
chrI	1872303	1872304	-	5	M01D7.2
chrI	1913858	1913859	-	13	Y51F10.7
chrI	1913858	1913859	-	13	Y71G12A.2
chrI	1913860	1913861	-	6	Y51F10.7
chrI	1913860	1913861	-	6	Y71G12A.2
chrI	1913872	1913873	-	13	Y51F10.7
chrI	1913872	1913873	-	13	Y71G12A.2
chrI	1913889	1913890	-	8	Y51F10.7
chrI	1913889	1913890	-	8	Y71G12A.2
chrI	1913897	1913898	-	6	Y51F10.7
chrI	1913897	1913898	-	6	Y71G12A.2
chrI	1913898	1913899	-	15	Y51F10.7
chrI	1913898	1913899	-	15	Y71G12A.2
chrI	1913899	1913900	-	5	Y51F10.7
chrI	1913899	1913900	-	5	Y71G12A.2
chrI	1913900	1913901	-	8	Y51F10.7
chrI	1913900	1913901	-	8	Y71G12A.2
chrI	1913903	1913904	-	29	Y51F10.7
chrI	1913903	1913904	-	29	Y71G12A.2
chrI	1913904	1913905	-	26	Y51F10.7
chrI	1913904	1913905	-	26	Y71G12A.2
chrI	1913905	1913906	-	6	Y51F10.7
chrI	1913905	1913906	-	6	Y71G12A.2
chrI	1913907	1913908	-	38	Y51F10.7
chrI	1913907	1913908	-	38	Y71G12A.2
chrI	1913908	1913909	-	10	Y51F10.7
chrI	1913908	1913909	-	10	Y71G12A.2
chrI	1913909	1913910	-	5	Y51F10.7
chrI	1913909	1913910	-	5	Y71G12A.2
chrI	1913910	1913911	-	20	Y51F10.7
chrI	1913910	1913911	-	20	Y71G12A.2
chrI	1913911	1913912	-	52	Y51F10.7
chrI	1913911	1913912	-	52	Y71G12A.2
chrI	1913912	1913913	-	85	Y51F10.7
chrI	1913912	1913913	-	85	Y71G12A.2
chrI	1913915	1913916	-	54	Y51F10.7
chrI	1913915	1913916	-	54	Y71G12A.2
chrI	1913916	1913917	-	17	Y51F10.7
chrI	1913916	1913917	-	17	Y71G12A.2
chrI	1913917	1913918	-	44	Y51F10.7
chrI	1913917	1913918	-	44	Y71G12A.2
chrI	1913918	1913919	-	22	Y51F10.7
chrI	1913918	1913919	-	22	Y71G12A.2
chrI	1913919	1913920	-	98	Y51F10.7
chrI	1913919	1913920	-	98	Y71G12A.2
chrI	1913920	1913921	-	8	Y51F10.7
chrI	1913920	1913921	-	8	Y71G12A.2
chrI	1913921	1913922	-	35	Y51F10.7
chrI	1913921	1913922	-	35	Y71G12A.2
chrI	1913922	1913923	-	59	Y51F10.7
chrI	1913922	1913923	-	59	Y71G12A.2
chrI	1913923	1913924	-	98	Y51F10.7
chrI	1913923	1913924	-	98	Y71G12A.2
chrI	1913924	1913925	-	15	Y51F10.7
chrI	1913924	1913925	-	15	Y71G12A.2
chrI	1913925	1913926	-	12	Y51F10.7
chrI	1913925	1913926	-	12	Y71G12A.2
chrI	1913926	1913927	-	13	Y51F10.7
chrI	1913926	1913927	-	13	Y71G12A.2
chrI	1913927	1913928	-	5	Y51F10.7
chrI	1913927	1913928	-	5	Y71G12A.2
chrI	1932247	1932248	+	8	Y51F10.5
chrI	1932257	1932258	+	8	Y51F10.5
chrI	1932258	1932259	+	22	Y51F10.5
chrI	1945188	1945189	+	5	Y51F10.4
chrI	1958157	1958158	-	5	Y51F10.10
chrI	1958165	1958166	-	18	Y51F10.10
chrI	1958493	1958494	-	5	Y51F10.10
chrI	1981816	1981817	+	18	Y51F10.2
chrI	2039686	2039687	-	5	Y20F4.4
chrI	2039688	2039689	-	7	Y20F4.4
chrI	2039689	2039690	-	16	Y20F4.4
chrI	2039690	2039691	-	21	Y20F4.4
chrI	2039693	2039694	-	5	Y20F4.4
chrI	2039694	2039695	-	63	Y20F4.4
chrI	2039698	2039699	-	84	Y20F4.4
chrI	2039699	2039700	-	28	Y20F4.4
chrI	2043700	2043701	-	8	Y20F4.4
chrI	2053694	2053695	-	10	Y20F4.5
chrI	2063981	2063982	-	17	Y37E3.1
chrI	2063985	2063986	-	11	Y37E3.1
chrI	2063990	2063991	-	8	Y37E3.1
chrI	2063991	2063992	-	6	Y37E3.1
chrI	2064000	2064001	-	7	Y37E3.1
chrI	2064001	2064002	-	11	Y37E3.1
chrI	2064615	2064616	+	7	Y37E3.3
chrI	2064625	2064626	+	9	Y37E3.3
chrI	2064635	2064636	+	6	Y37E3.3
chrI	2064643	2064644	+	5	Y37E3.3
chrI	2064644	2064645	+	7	Y37E3.3
chrI	2064674	2064675	+	26	Y37E3.3
chrI	2064676	2064677	+	32	Y37E3.3
chrI	2064677	2064678	+	5	Y37E3.3
chrI	2064679	2064680	+	34	Y37E3.3
chrI	2064683	2064684	+	41	Y37E3.3
chrI	2064684	2064685	+	22	Y37E3.3
chrI	2065375	2065376	+	6	Y37E3.4
chrI	2065386	2065387	+	8	Y37E3.4
chrI	2065388	2065389	+	18	Y37E3.4
chrI	2065390	2065391	+	21	Y37E3.4
chrI	2065395	2065396	+	8	Y37E3.4
chrI	2065396	2065397	+	24	Y37E3.4
chrI	2065397	2065398	+	15	Y37E3.4
chrI	2065398	2065399	+	7	Y37E3.4
chrI	2065399	2065400	+	6	Y37E3.4
chrI	2065408	2065409	+	8	Y37E3.4
chrI	2065409	2065410	+	6	Y37E3.4
chrI	2065410	2065411	+	7	Y37E3.4
chrI	2065424	2065425	+	12	Y37E3.4
chrI	2065434	2065435	+	19	Y37E3.4
chrI	2065435	2065436	+	25	Y37E3.4
chrI	2065436	2065437	+	27	Y37E3.4
chrI	2065437	2065438	+	8	Y37E3.4
chrI	2065454	2065455	+	6	Y37E3.4
chrI	2065456	2065457	+	5	Y37E3.4
chrI	2065457	2065458	+	6	Y37E3.4
chrI	2065458	2065459	+	15	Y37E3.4
chrI	2065459	2065460	+	44	Y37E3.4
chrI	2065460	2065461	+	18	Y37E3.4
chrI	2065461	2065462	+	10	Y37E3.4
chrI	2065462	2065463	+	36	Y37E3.4
chrI	2065464	2065465	+	14	Y37E3.4
chrI	2065468	2065469	+	15	Y37E3.4
chrI	2065469	2065470	+	27	Y37E3.4
chrI	2065470	2065471	+	11	Y37E3.4
chrI	2065471	2065472	+	60	Y37E3.4
chrI	2065472	2065473	+	11	Y37E3.4
chrI	2065474	2065475	+	8	Y37E3.4
chrI	2065475	2065476	+	38	Y37E3.4
chrI	2065476	2065477	+	5	Y37E3.4
chrI	2065477	2065478	+	8	Y37E3.4
chrI	2065479	2065480	+	13	Y37E3.4
chrI	2069267	2069268	-	5	Y37E3.7
chrI	2069270	2069271	-	12	Y37E3.7
chrI	2069272	2069273	-	6	Y37E3.7
chrI	2069284	2069285	-	7	Y37E3.7
chrI	2069294	2069295	-	72	Y37E3.7
chrI	2069394	2069395	-	5	Y37E3.7
chrI	2069418	2069419	-	5	Y37E3.7
chrI	2069458	2069459	-	5	Y37E3.7
chrI	2069461	2069462	-	8	Y37E3.7
chrI	2069462	2069463	-	8	Y37E3.7
chrI	2069463	2069464	-	5	Y37E3.7
chrI	2069464	2069465	-	12	Y37E3.7
chrI	2069465	2069466	-	9	Y37E3.7
chrI	2069466	2069467	-	6	Y37E3.7
chrI	2069471	2069472	-	5	Y37E3.7
chrI	2069473	2069474	-	8	Y37E3.7
chrI	2069481	2069482	-	5	Y37E3.7
chrI	2069482	2069483	-	13	Y37E3.7
chrI	2069486	2069487	-	7	Y37E3.7
chrI	2069488	2069489	-	16	Y37E3.7
chrI	2069489	2069490	-	9	Y37E3.7
chrI	2069495	2069496	-	5	Y37E3.7
chrI	2069496	2069497	-	5	Y37E3.7
chrI	2069497	2069498	-	10	Y37E3.7
chrI	2069498	2069499	-	15	Y37E3.7
chrI	2069499	2069500	-	13	Y37E3.7
chrI	2069500	2069501	-	12	Y37E3.7
chrI	2069501	2069502	-	6	Y37E3.7
chrI	2069502	2069503	-	10	Y37E3.7
chrI	2069503	2069504	-	6	Y37E3.7
chrI	2069504	2069505	-	9	Y37E3.7
chrI	2069505	2069506	-	47	Y37E3.7
chrI	2069506	2069507	-	43	Y37E3.7
chrI	2069507	2069508	-	13	Y37E3.7
chrI	2069510	2069511	-	7	Y37E3.7
chrI	2069511	2069512	-	9	Y37E3.7
chrI	2069512	2069513	-	11	Y37E3.7
chrI	2069513	2069514	-	19	Y37E3.7
chrI	2069514	2069515	-	44	Y37E3.7
chrI	2069515	2069516	-	110	Y37E3.7
chrI	2069516	2069517	-	19	Y37E3.7
chrI	2069517	2069518	-	56	Y37E3.7
chrI	2069518	2069519	-	251	Y37E3.7
chrI	2069519	2069520	-	128	Y37E3.7
chrI	2069520	2069521	-	66	Y37E3.7
chrI	2069521	2069522	-	21	Y37E3.7
chrI	2069522	2069523	-	38	Y37E3.7
chrI	2069523	2069524	-	84	Y37E3.7
chrI	2069524	2069525	-	45	Y37E3.7
chrI	2069525	2069526	-	115	Y37E3.7
chrI	2069526	2069527	-	30	Y37E3.7
chrI	2069527	2069528	-	12	Y37E3.7
chrI	2069528	2069529	-	52	Y37E3.7
chrI	2069529	2069530	-	14	Y37E3.7
chrI	2069530	2069531	-	23	Y37E3.7
chrI	2069531	2069532	-	56	Y37E3.7
chrI	2069532	2069533	-	14	Y37E3.7
chrI	2069533	2069534	-	40	Y37E3.7
chrI	2069536	2069537	-	6	Y37E3.7
chrI	2069537	2069538	-	146	Y37E3.7
chrI	2069538	2069539	-	73	Y37E3.7
chrI	2069539	2069540	-	79	Y37E3.7
chrI	2069540	2069541	-	357	Y37E3.7
chrI	2069541	2069542	-	70	Y37E3.7
chrI	2069542	2069543	-	58	Y37E3.7
chrI	2069543	2069544	-	49	Y37E3.7
chrI	2069544	2069545	-	11	Y37E3.7
chrI	2069545	2069546	-	55	Y37E3.7
chrI	2069546	2069547	-	42	Y37E3.7
chrI	2069547	2069548	-	112	Y37E3.7
chrI	2069548	2069549	-	23	Y37E3.7
chrI	2069549	2069550	-	368	Y37E3.7
chrI	2069550	2069551	-	150	Y37E3.7
chrI	2069551	2069552	-	73	Y37E3.7
chrI	2069552	2069553	-	127	Y37E3.7
chrI	2069553	2069554	-	244	Y37E3.7
chrI	2069554	2069555	-	19	Y37E3.7
chrI	2069555	2069556	-	228	Y37E3.7
chrI	2069556	2069557	-	53	Y37E3.7
chrI	2069557	2069558	-	40	Y37E3.7
chrI	2069558	2069559	-	161	Y37E3.7
chrI	2069559	2069560	-	80	Y37E3.7
chrI	2069560	2069561	-	65	Y37E3.7
chrI	2069561	2069562	-	21	Y37E3.7
chrI	2069562	2069563	-	90	Y37E3.7
chrI	2069563	2069564	-	82	Y37E3.7
chrI	2069564	2069565	-	24	Y37E3.7
chrI	2069565	2069566	-	649	Y37E3.7
chrI	2069566	2069567	-	215	Y37E3.7
chrI	2069567	2069568	-	698	Y37E3.7
chrI	2069568	2069569	-	1922	Y37E3.7
chrI	2069569	2069570	-	1190	Y37E3.7
chrI	2069570	2069571	-	68	Y37E3.7
chrI	2069571	2069572	-	485	Y37E3.7
chrI	2069572	2069573	-	119	Y37E3.7
chrI	2069573	2069574	-	280	Y37E3.7
chrI	2069574	2069575	-	187	Y37E3.7
chrI	2069575	2069576	-	440	Y37E3.7
chrI	2069576	2069577	-	9318	Y37E3.7
chrI	2069577	2069578	-	1135	Y37E3.7
chrI	2069578	2069579	-	349	Y37E3.7
chrI	2069579	2069580	-	294	Y37E3.7
chrI	2069580	2069581	-	679	Y37E3.7
chrI	2069581	2069582	-	188	Y37E3.7
chrI	2069583	2069584	-	5	Y37E3.7
chrI	2070166	2070167	-	8	Y37E3.8
chrI	2070167	2070168	-	5	Y37E3.8
chrI	2070183	2070184	-	6	Y37E3.8
chrI	2070193	2070194	-	5	Y37E3.8
chrI	2070196	2070197	-	14	Y37E3.8
chrI	2070197	2070198	-	8	Y37E3.8
chrI	2070198	2070199	-	16	Y37E3.8
chrI	2070202	2070203	-	13	Y37E3.8
chrI	2070203	2070204	-	11	Y37E3.8
chrI	2070204	2070205	-	15	Y37E3.8
chrI	2070205	2070206	-	8	Y37E3.8
chrI	2070206	2070207	-	56	Y37E3.8
chrI	2070207	2070208	-	21	Y37E3.8
chrI	2070208	2070209	-	410	Y37E3.8
chrI	2070469	2070470	-	7	Y37E3.8
chrI	2070504	2070505	-	5	Y37E3.8
chrI	2070507	2070508	-	5	Y37E3.8
chrI	2070508	2070509	-	7	Y37E3.8
chrI	2070517	2070518	-	5	Y37E3.8
chrI	2070518	2070519	-	8	Y37E3.8
chrI	2070527	2070528	-	5	Y37E3.8
chrI	2070529	2070530	-	7	Y37E3.8
chrI	2070534	2070535	-	13	Y37E3.8
chrI	2070535	2070536	-	7	Y37E3.8
chrI	2070536	2070537	-	10	Y37E3.8
chrI	2070538	2070539	-	9	Y37E3.8
chrI	2070543	2070544	-	5	Y37E3.8
chrI	2070545	2070546	-	9	Y37E3.8
chrI	2070547	2070548	-	11	Y37E3.8
chrI	2070548	2070549	-	18	Y37E3.8
chrI	2070549	2070550	-	11	Y37E3.8
chrI	2070550	2070551	-	13	Y37E3.8
chrI	2070551	2070552	-	18	Y37E3.8
chrI	2070552	2070553	-	13	Y37E3.8
chrI	2070553	2070554	-	35	Y37E3.8
chrI	2070554	2070555	-	18	Y37E3.8
chrI	2070555	2070556	-	51	Y37E3.8
chrI	2070556	2070557	-	13	Y37E3.8
chrI	2070557	2070558	-	7	Y37E3.8
chrI	2070558	2070559	-	18	Y37E3.8
chrI	2070562	2070563	-	24	Y37E3.8
chrI	2070563	2070564	-	7	Y37E3.8
chrI	2070564	2070565	-	17	Y37E3.8
chrI	2070565	2070566	-	10	Y37E3.8
chrI	2070566	2070567	-	13	Y37E3.8
chrI	2070567	2070568	-	16	Y37E3.8
chrI	2070568	2070569	-	16	Y37E3.8
chrI	2070569	2070570	-	9	Y37E3.8
chrI	2070570	2070571	-	17	Y37E3.8
chrI	2070571	2070572	-	14	Y37E3.8
chrI	2070572	2070573	-	16	Y37E3.8
chrI	2070575	2070576	-	70	Y37E3.8
chrI	2070576	2070577	-	17	Y37E3.8
chrI	2070577	2070578	-	21	Y37E3.8
chrI	2070578	2070579	-	6	Y37E3.8
chrI	2070579	2070580	-	47	Y37E3.8
chrI	2070580	2070581	-	18	Y37E3.8
chrI	2070581	2070582	-	24	Y37E3.8
chrI	2070582	2070583	-	27	Y37E3.8
chrI	2070583	2070584	-	16	Y37E3.8
chrI	2070584	2070585	-	67	Y37E3.8
chrI	2070585	2070586	-	97	Y37E3.8
chrI	2070586	2070587	-	318	Y37E3.8
chrI	2070587	2070588	-	186	Y37E3.8
chrI	2070588	2070589	-	482	Y37E3.8
chrI	2070589	2070590	-	38	Y37E3.8
chrI	2070590	2070591	-	203	Y37E3.8
chrI	2070591	2070592	-	30	Y37E3.8
chrI	2070592	2070593	-	60	Y37E3.8
chrI	2070593	2070594	-	609	Y37E3.8
chrI	2070594	2070595	-	8	Y37E3.8
chrI	2070595	2070596	-	38	Y37E3.8
chrI	2070596	2070597	-	79	Y37E3.8
chrI	2070597	2070598	-	576	Y37E3.8
chrI	2070598	2070599	-	465	Y37E3.8
chrI	2070599	2070600	-	36	Y37E3.8
chrI	2070600	2070601	-	601	Y37E3.8
chrI	2070601	2070602	-	90	Y37E3.8
chrI	2070602	2070603	-	678	Y37E3.8
chrI	2072414	2072415	+	5	Y37E3.9
chrI	2072463	2072464	+	10	Y37E3.9
chrI	2072490	2072491	+	6	Y37E3.9
chrI	2072496	2072497	+	5	Y37E3.9
chrI	2072507	2072508	+	5	Y37E3.9
chrI	2072508	2072509	+	5	Y37E3.9
chrI	2072521	2072522	+	7	Y37E3.9
chrI	2072522	2072523	+	6	Y37E3.9
chrI	2072527	2072528	+	7	Y37E3.9
chrI	2072534	2072535	+	8	Y37E3.9
chrI	2072537	2072538	+	26	Y37E3.9
chrI	2072538	2072539	+	32	Y37E3.9
chrI	2072539	2072540	+	16	Y37E3.9
chrI	2072540	2072541	+	13	Y37E3.9
chrI	2072541	2072542	+	15	Y37E3.9
chrI	2072542	2072543	+	144	Y37E3.9
chrI	2072543	2072544	+	29	Y37E3.9
chrI	2072544	2072545	+	146	Y37E3.9
chrI	2072545	2072546	+	10	Y37E3.9
chrI	2076863	2076864	+	6	Y37E3.10
chrI	2076902	2076903	+	11	Y37E3.10
chrI	2085672	2085673	+	5	Y37E3.13
chrI	2085674	2085675	+	19	Y37E3.13
chrI	2085677	2085678	+	6	Y37E3.13
chrI	2085678	2085679	+	15	Y37E3.13
chrI	2085679	2085680	+	35	Y37E3.13
chrI	2111615	2111616	+	10	Y37E3.15
chrI	2118527	2118528	-	9	Y37E3.16
chrI	2118527	2118528	-	9	Y37E3.15
chrI	2118531	2118532	-	34	Y37E3.16
chrI	2118531	2118532	-	34	Y37E3.15
chrI	2144982	2144983	+	6	Y37E3.17
chrI	2145133	2145134	+	5	Y37E3.17
chrI	2179735	2179736	+	8	W03F11.6
chrI	2179741	2179742	+	5	W03F11.6
chrI	2179743	2179744	+	6	W03F11.6
chrI	2179746	2179747	+	5	W03F11.6
chrI	2179763	2179764	+	5	W03F11.6
chrI	2179765	2179766	+	15	W03F11.6
chrI	2179767	2179768	+	6	W03F11.6
chrI	2179769	2179770	+	18	W03F11.6
chrI	2209618	2209619	+	5	W03F11.6
chrI	2209621	2209622	+	5	W03F11.6
chrI	2219483	2219484	+	5	W03F11.1
chrI	2222184	2222185	-	13	W03F11.1
chrI	2222188	2222189	-	9	W03F11.1
chrI	2222190	2222191	-	5	W03F11.1
chrI	2222191	2222192	-	5	W03F11.1
chrI	2222194	2222195	-	6	W03F11.1
chrI	2222196	2222197	-	7	W03F11.1
chrI	2222197	2222198	-	29	W03F11.1
chrI	2222198	2222199	-	17	W03F11.1
chrI	2222201	2222202	-	220	W03F11.1
chrI	2222270	2222271	-	14	W03F11.1
chrI	2222272	2222273	-	6	W03F11.1
chrI	2222273	2222274	-	7	W03F11.1
chrI	2222280	2222281	-	5	W03F11.1
chrI	2222294	2222295	-	10	W03F11.1
chrI	2222295	2222296	-	29	W03F11.1
chrI	2222297	2222298	-	6	W03F11.1
chrI	2254895	2254896	+	5	F12B6.2
chrI	2281472	2281473	+	5	Y39G10AL.1
chrI	2281516	2281517	+	17	Y39G10AL.3
chrI	2281517	2281518	+	6	Y39G10AL.3
chrI	2287742	2287743	-	5	Y39G10AL.3
chrI	2289582	2289583	-	5	Y39G10AL.3
chrI	2289586	2289587	-	7	Y39G10AL.3
chrI	2289740	2289741	-	12	Y39G10AL.3
chrI	2289743	2289744	-	6	Y39G10AL.3
chrI	2289744	2289745	-	16	Y39G10AL.3
chrI	2289748	2289749	-	11	Y39G10AL.3
chrI	2289749	2289750	-	20	Y39G10AL.3
chrI	2289751	2289752	-	11	Y39G10AL.3
chrI	2289752	2289753	-	7	Y39G10AL.3
chrI	2289753	2289754	-	12	Y39G10AL.3
chrI	2289754	2289755	-	101	Y39G10AL.3
chrI	2289755	2289756	-	7	Y39G10AL.3
chrI	2289758	2289759	-	7	Y39G10AL.3
chrI	2291143	2291144	-	5	Y39G10AL.3
chrI	2297308	2297309	+	5	Y39G10AR.12
chrI	2297308	2297309	+	5	Y39G10AR.11
chrI	2297313	2297314	+	5	Y39G10AR.12
chrI	2297316	2297317	+	5	Y39G10AR.12
chrI	2297317	2297318	+	11	Y39G10AR.12
chrI	2297318	2297319	+	6	Y39G10AR.12
chrI	2297321	2297322	+	15	Y39G10AR.12
chrI	2297322	2297323	+	5	Y39G10AR.12
chrI	2297324	2297325	+	5	Y39G10AR.12
chrI	2297326	2297327	+	6	Y39G10AR.12
chrI	2297328	2297329	+	10	Y39G10AR.12
chrI	2297334	2297335	+	9	Y39G10AR.12
chrI	2302673	2302674	+	5	Y39G10AR.12
chrI	2302673	2302674	+	5	Y39G10AR.10
chrI	2302703	2302704	+	5	Y39G10AR.12
chrI	2302703	2302704	+	5	Y39G10AR.10
chrI	2302723	2302724	+	6	Y39G10AR.12
chrI	2302723	2302724	+	6	Y39G10AR.10
chrI	2302726	2302727	+	5	Y39G10AR.12
chrI	2302726	2302727	+	5	Y39G10AR.10
chrI	2302729	2302730	+	8	Y39G10AR.12
chrI	2302729	2302730	+	8	Y39G10AR.10
chrI	2302736	2302737	+	5	Y39G10AR.12
chrI	2302736	2302737	+	5	Y39G10AR.10
chrI	2302749	2302750	+	7	Y39G10AR.12
chrI	2302749	2302750	+	7	Y39G10AR.10
chrI	2302750	2302751	+	7	Y39G10AR.12
chrI	2302750	2302751	+	7	Y39G10AR.10
chrI	2302751	2302752	+	6	Y39G10AR.12
chrI	2302751	2302752	+	6	Y39G10AR.10
chrI	2302752	2302753	+	5	Y39G10AR.12
chrI	2302752	2302753	+	5	Y39G10AR.10
chrI	2302753	2302754	+	6	Y39G10AR.12
chrI	2302753	2302754	+	6	Y39G10AR.10
chrI	2302766	2302767	+	11	Y39G10AR.12
chrI	2302766	2302767	+	11	Y39G10AR.10
chrI	2302771	2302772	+	9	Y39G10AR.12
chrI	2302771	2302772	+	9	Y39G10AR.10
chrI	2302772	2302773	+	9	Y39G10AR.12
chrI	2302772	2302773	+	9	Y39G10AR.10
chrI	2302773	2302774	+	13	Y39G10AR.12
chrI	2302773	2302774	+	13	Y39G10AR.10
chrI	2302774	2302775	+	12	Y39G10AR.12
chrI	2302774	2302775	+	12	Y39G10AR.10
chrI	2302775	2302776	+	5	Y39G10AR.12
chrI	2302775	2302776	+	5	Y39G10AR.10
chrI	2302779	2302780	+	19	Y39G10AR.12
chrI	2302779	2302780	+	19	Y39G10AR.10
chrI	2302780	2302781	+	14	Y39G10AR.12
chrI	2302780	2302781	+	14	Y39G10AR.10
chrI	2302788	2302789	+	5	Y39G10AR.12
chrI	2302788	2302789	+	5	Y39G10AR.10
chrI	2302790	2302791	+	13	Y39G10AR.12
chrI	2302790	2302791	+	13	Y39G10AR.10
chrI	2302791	2302792	+	15	Y39G10AR.12
chrI	2302791	2302792	+	15	Y39G10AR.10
chrI	2302794	2302795	+	6	Y39G10AR.12
chrI	2302794	2302795	+	6	Y39G10AR.10
chrI	2302797	2302798	+	29	Y39G10AR.12
chrI	2302797	2302798	+	29	Y39G10AR.10
chrI	2302798	2302799	+	6	Y39G10AR.12
chrI	2302798	2302799	+	6	Y39G10AR.10
chrI	2302801	2302802	+	18	Y39G10AR.12
chrI	2302801	2302802	+	18	Y39G10AR.10
chrI	2302803	2302804	+	67	Y39G10AR.12
chrI	2302803	2302804	+	67	Y39G10AR.10
chrI	2302805	2302806	+	14	Y39G10AR.12
chrI	2302805	2302806	+	14	Y39G10AR.10
chrI	2302806	2302807	+	17	Y39G10AR.12
chrI	2302806	2302807	+	17	Y39G10AR.10
chrI	2302807	2302808	+	28	Y39G10AR.12
chrI	2302807	2302808	+	28	Y39G10AR.10
chrI	2302808	2302809	+	22	Y39G10AR.12
chrI	2302808	2302809	+	22	Y39G10AR.10
chrI	2302809	2302810	+	94	Y39G10AR.12
chrI	2302809	2302810	+	94	Y39G10AR.10
chrI	2302810	2302811	+	22	Y39G10AR.12
chrI	2302810	2302811	+	22	Y39G10AR.10
chrI	2302813	2302814	+	29	Y39G10AR.12
chrI	2302813	2302814	+	29	Y39G10AR.10
chrI	2302814	2302815	+	48	Y39G10AR.12
chrI	2302814	2302815	+	48	Y39G10AR.10
chrI	2302815	2302816	+	39	Y39G10AR.12
chrI	2302815	2302816	+	39	Y39G10AR.10
chrI	2302816	2302817	+	57	Y39G10AR.12
chrI	2302816	2302817	+	57	Y39G10AR.10
chrI	2302817	2302818	+	8	Y39G10AR.12
chrI	2302817	2302818	+	8	Y39G10AR.10
chrI	2302818	2302819	+	6	Y39G10AR.12
chrI	2302818	2302819	+	6	Y39G10AR.10
chrI	2302821	2302822	+	12	Y39G10AR.12
chrI	2302821	2302822	+	12	Y39G10AR.10
chrI	2302822	2302823	+	5	Y39G10AR.12
chrI	2304384	2304385	-	8	Y39G10AR.12
chrI	2304389	2304390	-	12	Y39G10AR.12
chrI	2306650	2306651	-	9	Y39G10AR.13
chrI	2306655	2306656	-	16	Y39G10AR.13
chrI	2306787	2306788	-	8	Y39G10AR.13
chrI	2306788	2306789	-	10	Y39G10AR.13
chrI	2306790	2306791	-	11	Y39G10AR.13
chrI	2306791	2306792	-	80	Y39G10AR.13
chrI	2308786	2308787	+	7	Y39G10AR.9
chrI	2308824	2308825	+	5	Y39G10AR.9
chrI	2308840	2308841	+	11	Y39G10AR.9
chrI	2308843	2308844	+	5	Y39G10AR.9
chrI	2308845	2308846	+	6	Y39G10AR.9
chrI	2308851	2308852	+	6	Y39G10AR.9
chrI	2308861	2308862	+	7	Y39G10AR.9
chrI	2308865	2308866	+	22	Y39G10AR.9
[truncated: 97,235 more rows]
