# Supplementary material for: Direct full-length RNA sequencing reveals unexpected transcriptome complexity during Caenorhabditis elegans development
Source: HighWire-hosted journal article supplement (doi:10.1101/gr.251512.119), 2020-02-01
Supplement: Supplemental_Table_S7.xlsx [file Supplemental_Table_S7.xlsx]

## Sheet: DEG_L1_vs_EMB
Table S4 Deferentially expressed genes between embryo, L1 and young adult stage.
Sequence name	WBID	Symbol	Concise	Geneclass
2RSSE.1	WBGene00007064	2RSSE.1	2RSSE.1 encodes a protein that contains a RhoGAP domain and Concise description: 2RSSE.1 encodes a protein that contains a RhoGAP domain and that is similar to Drosophila RhoGAP71E whose activity regulates the number and	not known
4R79.1	WBGene00003525	nas-6	nas-6 encodes an astacin-like metalloprotease.	Nematode AStacin protease
AC3.10	WBGene00004964	spe-10	spe-10 encodes a DHHC-CRD family zinc-finger transmembrane Concise description: spe-10 encodes a DHHC-CRD family zinc-finger transmembrane protein with homologs in other eukaryotes and is predicted to be a palmitoyl transferase; spe-10 is required during spermatogenesis and thus for fertility; specifically, spe-10 is required for the proper biogenesis and functioning of specialized Golgi-derived …	defective SPErmatogenesis
AC3.3	WBGene00000024	abu-1	abu-1 encodes a transmembrane protein with a predicted signal Concise description: abu-1 encodes a transmembrane protein with a predicted signal sequence, a glutamine/asparagine-rich domain and multiple cysteine-rich repeats (DUF139); abu-1 expression is induced by blockage of the endoplasmic reticulum unfolded protein response, and ABU-1 may help protect the organism from damage by improperly fo…	Activated in Blocked Unfolded protein response
AC3.5	WBGene00007071	AC3.5	none available	not known
AC3.8	WBGene00007073	ugt-2	none available	UDP-GlucuronosylTransferase
AH10.1	WBGene00007082	acs-10	none available	fatty Acid CoA Synthetase family
AH6.10	WBGene00005032	sra-6	sra-6 encodes a seven-transmembrane chemosensory receptor; Concise description: sra-6 encodes a seven-transmembrane chemosensory receptor; an sra-6::GFP fusion reporter is expressed in the ASH (strongly) and ASI (weakly) amphid sensory neurons, the PVQ interneurons, and in the SPD and SPV male spicule neurons; sra-6 expression in the ASH neurons is positively regulated by KIN-29, a serine/threoni…	Serpentine Receptor, class A (alpha)
AH6.11	WBGene00005033	sra-7	sra-7 encodes a seven transmembrane receptor predicted to function Concise description: sra-7 encodes a seven transmembrane receptor predicted to function as a G protein-coupled chemosensory receptor; an SRA-7::GFP fusion protein is expressed	Serpentine Receptor, class A (alpha)
AH6.2	WBGene00007080	sfxn-1.1	none available	SideroFleXiN (mitochondrial iron transporter)
AH6.3	WBGene00007081	AH6.3	none available	not known
AH6.5	WBGene00003231	mex-6	mex-6 encodes a CCCH zinc-finger protein highly similar to Concise description: mex-6 encodes a CCCH zinc-finger protein highly similar to MEX-5 that functions with MEX-5 to affect embryonic viability, establish soma germline asymmetry in embryos and establish PIE-1, MEX-1, and POS-1 asymmetry in embryos, and also affects formation of intestinal cells; MEX-6 and MEX-5 may act downstream	Muscle EXcess
AH9.2	WBGene00000797	crn-4	crn-4 encodes a DEDD family DNase, a cell death-related nuclease; Concise description: crn-4 encodes a DEDD family DNase, a cell death-related nuclease; crn-4 exhibits both DNase and RNase activities; crn-4 is believed to function in a large multinuclease complex, the degradeosome, whose components include the protein products of cps-6, crn-1, crn-5, cpy-13 and other non-nuclease components like …	Cell-death-Related Nuclease
AH9.3	WBGene00014999	AH9.3	none available	not known
B0001.5	WBGene00007090	B0001.5	none available	not known
B0001.8	WBGene00007093	B0001.8	none available	not known
B0019.1	WBGene00000138	amx-2	none available	AMine oXidase family
B0024.1	WBGene00000722	col-149	none available	COLlagen
B0024.12	WBGene00001646	gna-1	gna-1 encodes one of two C. elegans glucosamine 6-phosphate Concise description: gna-1 encodes one of two C. elegans glucosamine 6-phosphate N-acetyltransferases (GNAs); by homology, GNA-1 is predicted to be required for the formation of UDP-N-acetylglucosamine, a substrate in chitin synthesis, Golgi and cytoplasmic glycosylation, and GPI anchoring; gna-1, like chs-2, is expressed pharyngeally ra…	Glucosamine phosphate N-Acetyl transferase
B0024.2	WBGene00000723	col-150	none available	COLlagen
B0025.4	WBGene00015001	B0025.4	B0025.4 encodes a small, novel protein; microarray analyses Concise description: B0025.4 encodes a small, novel protein; microarray analyses suggest that B0025.4 belongs to the class of strictly maternal genes and SAGE experiments detect highest levels of expression in purified oocytes, N2 embryos, and pharynx	not known
B0025.5	WBGene00194700	B0025.5	none available	not known
B0025.8	WBGene00219779	B0025.8	none available	not known
B0034.1	WBGene00015002	B0034.1	none available	not known
B0034.5	WBGene00015005	B0034.5	none available	not known
B0034.7	WBGene00044394	B0034.7	B0034.7 is a predicted gene that can encode a small, novel Concise description: B0034.7 is a predicted gene that can encode a small, novel protein that has similarity to a predicted C. remanei protein and to a region of	not known
B0035.1	WBGene00007105	znf-207	none available	ZiNc Finger protein homolog
B0035.13	WBGene00007112	B0035.13	none available	not known
B0035.16	WBGene00007114	mttu-1	mttu-1 encodes a mitochondrial tRNA 2-thiouridylase orthologous Concise description: mttu-1 encodes a mitochondrial tRNA 2-thiouridylase orthologous to human TRMU (tRNA 5-methylaminomethyl-2-thiouridylate methyltransferase); by homology, nuclear-encoded MTTU-1 is predicted to catalyze the 2-thiolation of uridine at the wobble position (U34) of mitochondrial tRNAs and thereby promote mitochondrial…	nuclear encoded Mitochondrial TRNA 2-ThioUridylase
B0035.6	WBGene00007109	B0035.6	none available	not known
B0035.7	WBGene00001921	his-47	his-47 encodes an H2A histone; by homology, HIS-47 is predicted Concise description: his-47 encodes an H2A histone; by homology, HIS-47 is predicted to function as a nucleosome component required for packaging of DNA into chromatin; his-47 is a replication-dependent histone locus that resides in a histone gene-rich	HIStone
B0041.2	WBGene00015007	ain-2	ain-2 encodes, by alternative splicing, three isoforms of an Concise description: ain-2 encodes, by alternative splicing, three isoforms of an unfamiliar protein paralogous to AIN-1, and homologous to Brugia malayi 14748.m00068, 14052.m00191, and 14963.m01790; AIN-2 protein binds GEI-4 and GEI-16 in yeast two-hybrid experiments; AIN-2 and its nematode homologs have weak similarity to human TNRC6A…	ALG-1 INteracting protein
B0041.3	WBGene00015008	lmd-2	none available	LysM Domain (peptidoglycan binding) protein
B0041.8	WBGene00015011	B0041.8	none available	not known
B0047.3	WBGene00015014	bath-24	none available	BTB and MATH domain containing
B0198.1	WBGene00006646	tsp-20	none available	TetraSPanin family
B0198.2	WBGene00007115	B0198.2	none available	not known
B0198.3	WBGene00007116	B0198.3	none available	not known
B0205.1	WBGene00015017	B0205.1	none available	not known
B0205.10	WBGene00015024	B0205.10	none available	not known
B0205.14	WBGene00044646	B0205.14	B0205.14 is a predicted gene that can encode a small, novel Concise description: B0205.14 is a predicted gene that can encode a small, novel	not known
B0205.4	WBGene00015019	B0205.4	The B0205.4 gene encodes a homolog of the human gene FUT1, Concise description: The B0205.4 gene encodes a homolog of the human gene FUT1,	not known
B0205.9	WBGene00015023	B0205.9	none available	not known
B0207.10	WBGene00015033	B0207.10	none available	not known
B0207.2	WBGene00015027	B0207.2	none available	not known
B0207.4	WBGene00000099	air-2	air-2 encodes an aurora/Ipl1-related serine/threonine protein Concise description: air-2 encodes an aurora/Ipl1-related serine/threonine protein kinase that affects embryonic viability and chromosome segregation during meiosis and mitosis and is required for cytokinesis; AIR-2 has two functions during mitosis, one in chromosome segregation, and a second, independent function in cytokinesis throug…	Aurora/Ipl1 Related kinase
B0207.7	WBGene00015030	B0207.7	none available	not known
B0212.1	WBGene00015035	otpl-1	otpl-1 encodes an ortholog of otopetrins such as human OTOP1 Concise description: otpl-1 encodes an ortholog of otopetrins such as human OTOP1 (OMIM:607806), OTOP2 (OMIM:607827), and OTOP3 (OMIM:607828), along with other homologs in fish and insects (such as crustacean OTOPLb); otopetrins are predicted to have 12 transmembrane helices; by homology with OTOP1 and OTOPLb, OTPL-1 might regulate intr…	OToPetrin-Like
B0213.10	WBGene00015040	cyp-34A5	none available	CYtochrome P450 family
B0213.11	WBGene00015041	cyp-34A6	none available	CYtochrome P450 family
B0213.12	WBGene00015042	cyp-34A7	none available	CYtochrome P450 family
B0213.14	WBGene00015043	cyp-34A8	none available	CYtochrome P450 family
B0213.15	WBGene00015044	cyp-34A9	none available	CYtochrome P450 family
B0213.16	WBGene00015045	cyp-34A10	none available	CYtochrome P450 family
B0213.2	WBGene00003765	nlp-27	nlp-27 encodes a predicted neuropeptide with homology to C. Concise description: nlp-27 encodes a predicted neuropeptide with homology to C.	Neuropeptide-Like Protein
B0213.3	WBGene00003766	nlp-28	nlp-28 encodes a neuropeptide-like protein.	Neuropeptide-Like Protein
B0218.1	WBGene00015047	faah-1	faah-1 encodes a putative fatty acid amide hydrolase enzyme Concise description: faah-1 encodes a putative fatty acid amide hydrolase enzyme and is orthologous to human fatty acid amide hydrolase (FAAH); faah-1 is involved in regulating N-acylethanolamines (NAEs), which are lipid-derived signalling molecules, reduced levels of which, under dietary restriction, result in increased lifespan; faah-1…	Fatty Acid Amide Hydrolase homolog
B0218.3	WBGene00004055	pmk-1	pmk-1 encodes a mitogen-activated protein kinase (MAPK), orthologous Concise description: pmk-1 encodes a mitogen-activated protein kinase (MAPK), orthologous to human p38 MAPK (OMIM:600289); PMK-1 is an essential component of the MAPK pathway that regulates the innate immune response; PMK-1 is required, upstream of CED-9, for eliciting gonadal programmed cell death in response to Salmonella ente…	P38 Map Kinase family
B0218.5	WBGene00015049	B0218.5	none available	not known
B0218.6	WBGene00015050	clec-51	none available	C-type LECtin
B0218.7	WBGene00015051	B0218.7	none available	not known
B0218.8	WBGene00015052	clec-52	none available	C-type LECtin
B0222.1	WBGene00015053	B0222.1	none available	not known
B0222.10	WBGene00015058	B0222.10	none available	not known
B0222.11	WBGene00044582	B0222.11	B0222.11 encodes a novel protein with a predicted signal sequence Concise description: B0222.11 encodes a novel protein with a predicted signal sequence	not known
B0222.3	WBGene00015055	pitr-3	none available	PIT (mammalian phosphate transporter) Related
B0222.5	WBGene00015056	B0222.5	none available	not known
B0222.6	WBGene00000717	col-144	none available	COLlagen
B0222.7	WBGene00000718	col-145	none available	COLlagen
B0222.8	WBGene00000599	col-10	none available	COLlagen
B0222.9	WBGene00015057	gad-3	none available	GAstrulation Defective
B0228.1	WBGene00015059	B0228.1	none available	not known
B0228.6	WBGene00015063	B0228.6	none available	not known
B0238.11	WBGene00015075	B0238.11	none available	not known
B0238.12	WBGene00015076	B0238.12	B0238.12 encodes a putative secreted TIL-domain protease inhibitor Concise description: B0238.12 encodes a putative secreted TIL-domain protease inhibitor paralogous to SWM-1, ISL-1, and the products of 11 other C. elegans genes; B0238.12 and its relatives are collectively similar to other TIL-domain protease inhibitors from nematodes, insects, and vertebrates; B0238.12 has no obvious function in…	not known
B0238.13	WBGene00015077	B0238.13	none available	not known
B0238.15	WBGene00044537	B0238.15	none available	not known
B0240.3	WBGene00000907	daf-11	daf-11 encodes a transmembrane guanylate cyclase; daf-11 activity Concise description: daf-11 encodes a transmembrane guanylate cyclase; daf-11 activity is required for a number of processes dependent upon normal chemosensory function, including dauer formation and recovery and chemotaxis to both volatile and non-volatile odorants; daf-11 is also required for axon formation; daf-11 acts together …	abnormal DAuer Formation
B0244.2	WBGene00002048	ida-1	ida-1 encodes a protein tyrosine phosphatase-like receptor, Concise description: ida-1 encodes a protein tyrosine phosphatase-like receptor, orthologous to the mammalian type I diabetes autoantigens IA-2 and phogrin that are expressed in dense core vesicles of neuroendocrine tissue and involved in regulated protein secretion; in C. elegans, IDA-1 appears to be required for regulating presynaptic …	related to Islet cell Diabetes Autoantigen
B0244.8	WBGene00015083	egg-1	egg-1 encodes a LDL-receptor repeat-containing protein that Concise description: egg-1 encodes a LDL-receptor repeat-containing protein that is required for fertilization; egg-1 acts redundantly with a similar protein, egg-2, and both proteins are expressed in the developing oocyte; egg-1 is not required for male fertility; egg-1 localizes to the oocyte plasma membrane; the structure and localiza…	EGG sterile (unfertilizable)
B0244.9	WBGene00015084	B0244.9	none available	not known
B0250.12	WBGene00050927	B0250.12	none available	not known
B0250.18	WBGene00206505	B0250.18	none available	not known
B0250.4	WBGene00007121	B0250.4	none available	not known
B0250.7	WBGene00007124	B0250.7	none available	not known
B0250.8	WBGene00007125	B0250.8	none available	not known
B0252.4	WBGene00000886	cyn-10	cyn-10 encodes a divergent cyclophilin isoform that is functional Concise description: cyn-10 encodes a divergent cyclophilin isoform that is functional	CYclophyliN
B0252.5	WBGene00015089	B0252.5	none available	not known
B0252.8	WBGene00044615	B0252.8	none available	not known
B0261.2	WBGene00002583	let-363	none available	LEThal
B0261.6	WBGene00015094	B0261.6	none available	not known
B0261.7	WBGene00015095	B0261.7	none available	not known
B0272.1	WBGene00006538	tbb-4	none available	TuBulin, Beta
B0272.2	WBGene00007128	memb-1	none available	MEMBrin (SNARE protein)
B0273.1	WBGene00015097	B0273.1	none available	not known
B0280.10	WBGene00015105	pot-1	none available	Protection Of Telomeres 1 (Pot1) homolog
B0280.11	WBGene00015106	B0280.11	none available	not known
B0280.12	WBGene00001613	glr-2	glr-2 encodes an AMPA (non-NMDA)-type ionotropic glutamate Concise description: glr-2 encodes an AMPA (non-NMDA)-type ionotropic glutamate receptor subunit; GLR-2 activity is required for mediating the behavioral response to light nose touch and for regulating the frequency with which animals change locomotory direction in response to sensory cues such as food; GLR-2 and GLR-1, a second AMPA-type…	GLutamate Receptor family (AMPA)
B0280.13	WBGene00015107	viro-2	none available	Virus Induced Reporter Off
B0280.17	WBGene00044674	B0280.17	none available	not known
B0280.2	WBGene00015100	B0280.2	none available	not known
B0280.4	WBGene00003845	odd-1	odd-1 encodes a C2H2-type zinc finger-containing transcription Concise description: odd-1 encodes a C2H2-type zinc finger-containing transcription factor similar to Drosophila odd skipped which is required for embryonic patterning; ODD-1 is expressed in the gut during embryogenesis and appears to be essential for	Drosophila ODD-skipped-like
B0281.3	WBGene00015110	B0281.3	none available	not known
B0281.5	WBGene00015112	B0281.5	none available	not known
B0281.6	WBGene00015113	B0281.6	none available	not known
B0284.1	WBGene00007131	pals-26	none available	Protein containing ALS2cr12 (ALS2CR12) signature
B0284.3	WBGene00007133	B0284.3	none available	not known
B0284.5	WBGene00045188	B0284.5	none available	not known
B0285.1	WBGene00007135	cdk-12	none available	Cyclin-Dependent Kinase family
B0285.5	WBGene00002003	hse-5	hse-5 encodes the C. elegans ortholog of the heparan sulfate Concise description: hse-5 encodes the C. elegans ortholog of the heparan sulfate modifying enzyme glucuronyl C5-epimerase; by homology, HSE-5 is predicted to function in heparan sulfate biosynthesis by catalyzing the chain-modifying epimerization of glucuronic acid to iduronic acid; during development, hse-5 activity is required for no…	Heparan Sulfate-glucuronic acid-5-Epimerase
B0285.7	WBGene00007139	mnp-1	mnp-1 encodes a protein related to the M1 family of metalloproteinases, Concise description: mnp-1 encodes a protein related to the M1 family of metalloproteinases, but whose sequence indicates that it is unlikely to be catalytically active (MNP-1 lacks three of the four essential zinc-binding amino acids); during embryonic development mnp-1 activity is required, likely cell autonomously, for mig…	Matrix Non-Peptidase homolog
B0285.9	WBGene00000512	ckb-2	ckb-2 encodes an isoform of choline kinase whose activity has Concise description: ckb-2 encodes an isoform of choline kinase whose activity has been verified in vitro; CKB-1 through CKB-4 comprise a related group ('B') of choline kinases; purified CKB-2 has a strong preference for choline over ethanolamine, a	Choline Kinase B
B0286.3	WBGene00015116	pacs-1	none available	PhosphoribosylAminoimidazole succinoCarboxamide Synthetase
B0294.1	WBGene00015117	B0294.1	none available	not known
B0302.1	WBGene00002207	sid-3	sid-3 encodes a nonreceptor tyrosine kinase that is a member Concise description: sid-3 encodes a nonreceptor tyrosine kinase that is a member of the activated cdc-42-associated kinase (Ack) subfamily of cytoplasmic tyrosine kinases; in C. elegans sid-3 functions to regulate the import of dsRNA into cells, thus affecting the efficiency of RNA-mediated gene silencing (RNAi); SID-3 localizes	Systemic RNA Interference Defective
B0303.11	WBGene00015131	B0303.11	none available	not known
B0303.14	WBGene00015132	B0303.14	none available	not known
B0303.7	WBGene00015128	B0303.7	none available	not known
B0303.8	WBGene00015129	sdz-1	none available	SKN-1 Dependent Zygotic transcript
B0304.1	WBGene00001948	hlh-1	hlh-1 encodes a basic helix-loop-helix (bHLH) transcription Concise description: hlh-1 encodes a basic helix-loop-helix (bHLH) transcription factor that is the C. elegans ortholog of the myogenic regulatory factor (MRF) subgroup of bHLH proteins; in C. elegans, HLH-1 activity is required during embryogenesis for proper bodywall muscle development and function, but not for bodywall muscle cell fat…	Helix Loop Helix
B0304.2	WBGene00015134	B0304.2	none available	not known
B0310.2	WBGene00015138	B0310.2	none available	not known
B0331.1	WBGene00007140	cyp-29A4	none available	CYtochrome P450 family
B0331.2	WBGene00007141	pitr-4	none available	PIT (mammalian phosphate transporter) Related
B0334.1	WBGene00007142	ttr-18	none available	TransThyretin-Related family domain
B0334.15	WBGene00195248	emc-5	none available	EMC Endoplasmic Membrane protein Complex (yeast EMC) homolog
B0334.2	WBGene00006660	twk-5	twk-5 encodes one of 44 C. elegans TWK (two-P domain K+) potassium Concise description: twk-5 encodes one of 44 C. elegans TWK (two-P domain K+) potassium channel subunits that contain two pore-forming domains and four transmembrane domains; as loss of TWK-5 function via RNA-mediated interference (RNAi) does not result in any abnormalities, the precise role of TWK-5 in C. elegans development and/…	TWiK family of potassium channels
B0334.5	WBGene00007145	B0334.5	none available	not known
B0334.6	WBGene00007146	B0334.6	none available	not known
B0336.13	WBGene00015150	B0336.13	none available	not known
B0336.4	WBGene00004348	rgs-5	rgs-5 encodes a regulator of G protein signaling; by homology, Concise description: rgs-5 encodes a regulator of G protein signaling; by homology, RGS-5 is predicted to function as a GTPase-activating protein that binds G protein alpha subunits and negatively regulates heterotrimeric G protein signaling; loss of rgs-5 activity via RNAi or a deletion mutation results in no obvious defects, and lik…	Regulator of G protein Signaling
B0336.5	WBGene00015145	arle-14	none available	Adp (ADP) Ribosylation factor Like gtpase (GTPase) 14 Effector Gene class description: Adp (ADP) Ribosylation factor Like gtpase (GTPase) 14 Effector
B0336.7	WBGene00015147	B0336.7	B0336.7 encodes, by alternative splicing, two isoforms of a Concise description: B0336.7 encodes, by alternative splicing, two isoforms of a protein with a THAP or THAP-like domain; other proteins with such domains include LIN-15A, LIN-15B, LIN-36, and HIM-17 (which all interact with LIN-35/Rb), as well as CDC-14B, CTB-1, GON-14, and ~100 other proteins such as Drosophila P element transposase an…	not known
B0344.2	WBGene00006955	wrt-9	wrt-9 encodes a hedgehog-like protein, with an N-terminal signal Concise description: wrt-9 encodes a hedgehog-like protein, with an N-terminal signal sequence, a Wart domain, and a C-terminal region of proline-rich, low-complexity sequence; the Wart domain is predicted to form a cysteine-crosslinked protein involved in intercellular signalling, and it has subtle similarity to the N-terminal Hedge	WaRThog (hedgehog-like family)
B0348.2	WBGene00015152	B0348.2	none available	not known
B0350.2	WBGene00006780	unc-44	none available	UNCoordinated
B0361.4	WBGene00015158	B0361.4	none available	not known
B0361.9	WBGene00015163	B0361.9	none available	not known
B0365.6	WBGene00007153	clec-41	none available	C-type LECtin
B0365.9	WBGene00219208	B0365.9	none available	not known
B0379.1	WBGene00007155	B0379.1	none available	not known
B0379.2	WBGene00007156	B0379.2	none available	not known
B0379.3	WBGene00003508	mut-16	mut-16 encodes a glutamine/asparagine (Q/N)-rich domain-containing Concise description: mut-16 encodes a glutamine/asparagine (Q/N)-rich domain-containing protein that lacks obvious homologs outside of other nematode species; MUT-16 activity is required for RNA-mediated interference (RNAi), transgene silencing in germ-line and somatic tissues, and for maintaining low levels of transposon mobiliza…	MUTator
B0379.7	WBGene00007159	B0379.7	none available	not known
B0391.10	WBGene00007165	B0391.10	none available	not known
B0391.9	WBGene00007164	fbxa-139	none available	F-box A protein
B0393.14	WBGene00197966	B0393.14	none available	not known
B0393.3	WBGene00007168	B0393.3	none available	not known
B0393.5	WBGene00007170	B0393.5	none available	not known
B0393.6	WBGene00007171	B0393.6	none available	not known
B0393.8	WBGene00007173	B0393.8	none available	not known
B0393.9	WBGene00044636	B0393.9	none available	not known
B0395.2	WBGene00007174	mboa-1	mboa-1 encodes a putative acyl-Coenzyme A:cholesterol ('sterol') Concise description: mboa-1 encodes a putative acyl-Coenzyme A:cholesterol ('sterol') O-acyltransferase, orthologous to human SOAT1 (OMIM:102642); MBOA-1 is required for normal locomotion and normally long lifespan in mass RNAi assays; mboa-1 is expressed in the seam cells and nervous systems of larvae and adults, and in the	Membrane Bound O-Acyl transferase, MBOAT
B0403.4	WBGene00015168	pdi-6	none available	Protein Disulfide Isomerase
B0403.6	WBGene00043982	B0403.6	none available	not known
B0410.2	WBGene00015171	vang-1	vang-1 encodes an ortholog of Drosophila STRABISMUS/VAN GOGH; Concise description: vang-1 encodes an ortholog of Drosophila STRABISMUS/VAN GOGH; vang-1 enables Wnt-directed planar cell polarity; VANG-1 is required for the fully asymmetrical division of B.a versus B.p cells, though this requirement is quantitatively weak; vang-1 also negatively regulates adult lifespan via the DAF-2/IGFR insulin s…	VANG (Van Gogh/Strabismus planar polarity protein) homolog
B0410.3	WBGene00015172	B0410.3	none available	not known
B0412.1	WBGene00000895	dac-1	dac-1 encodes the C. elegans ortholog of Dachshund, a transcriptional Concise description: dac-1 encodes the C. elegans ortholog of Dachshund, a transcriptional regulator first described in Drosophila that is a member of the SKI/SNO/DAC family of proteins; dac-1 is expressed at higher levels in the AFD thermosensory neurons as compared to the AWB olfactory neurons and likely plays a role in therm…	DAChsund transcription factor homolog
B0412.2	WBGene00000903	daf-7	daf-7 encodes a member of the transforming growth factor beta Concise description: daf-7 encodes a member of the transforming growth factor beta superfamily; in C. elegans, DAF-7 functions as part of a signaling pathway that interprets environmental conditions to regulate energy-balance pathways that affect dauer larval formation, adult lifespan, fat metabolism, egg laying, pathogen avoidance beh…	abnormal DAuer Formation
B0412.7	WBGene00044939	B0412.7	none available	not known
B0414.3	WBGene00001856	hil-5	none available	HIstone H1 Like
B0414.6	WBGene00001600	glh-3	glh-3 encodes a predicted DEAD-like RNA helicase; GLH-3 interacts Concise description: glh-3 encodes a predicted DEAD-like RNA helicase; GLH-3 interacts with itself and with CSN-5, KGB-1, ZYX-1, and GLH-1 in vitro, and is expressed in	Germ Line Helicase
B0416.4	WBGene00015180	B0416.4	none available	not known
B0416.5	WBGene00015181	B0416.5	none available	not known
B0416.7	WBGene00015182	B0416.7	none available	not known
B0432.14	WBGene00044640	B0432.14	none available	not known
B0432.7	WBGene00015188	B0432.7	none available	not known
B0454.1	WBGene00002997	lin-8	lin-8 is a class A synthetic multivulva (synMuv) gene that Concise description: lin-8 is a class A synthetic multivulva (synMuv) gene that functions redundantly with class B synMuv genes to negatively regulate Ras-mediated	abnormal cell LINeage
B0454.10	WBGene00005542	sri-30	none available	Serpentine Receptor, class I
B0454.26	WBGene00206372	B0454.26	none available	not known
B0454.6	WBGene00015197	B0454.6	none available	not known
B0454.9	WBGene00015200	B0454.9	none available	not known
B0457.2	WBGene00007178	B0457.2	none available	not known
B0462.3	WBGene00007182	fbxb-119	none available	F-box B protein
B0464.7	WBGene00000235	baf-1	baf-1 encodes a small, novel protein that is highly conserved Concise description: baf-1 encodes a small, novel protein that is highly conserved amongst metazoa; BAF-1 binds double-stranded DNA nonspecifically in vitro and is essential for proper chromosome segregation, embryogenesis, and gonad development in vivo; biochemical and phenotypic analyses suggest that BAF-1 functions as an intramolecu…	Barrier to Autointegration Factor
B0464.8	WBGene00007187	tag-342	none available	Temporarily Assigned Gene name
B0478.3	WBGene00015202	B0478.3	none available	not known
B0491.1	WBGene00007189	B0491.1	none available	not known
B0491.2	WBGene00005016	sqt-1	sqt-1 encodes a cuticle collagen; during larval and adult development, Concise description: sqt-1 encodes a cuticle collagen; during larval and adult development, sqt-1 activity is required, likely redundantly, for normal cuticle, and hence organismal, morphology; sqt-1 mRNA abundance oscillates during larval development, peaking at one point during each larval stage and peaking again in adults; …	SQuaT
B0491.3	WBGene00007190	rmd-3	none available	Regulator of Microtubule Dynamics
B0491.4	WBGene00007191	lgc-20	none available	Ligand-Gated ion Channel
B0491.6	WBGene00007193	B0491.6	none available	not known
B0491.8	WBGene00000529	clh-2	clh-2 encodes a chloride channel protein that is required for Concise description: clh-2 encodes a chloride channel protein that is required for embryonic viability; may have two transcripts transcribed from alternative promoters,	CLC-type chloride cHannel
B0495.8	WBGene00015207	B0495.8	none available	not known
B0496.11	WBGene00194883	B0496.11	none available	not known
B0507.1	WBGene00015218	B0507.1	none available	not known
B0507.10	WBGene00015227	ddn-1	none available	Downstream of Daf-Nineteen
B0507.8	WBGene00015225	B0507.8	none available	not known
B0511.1	WBGene00001432	fkb-7	fkb-7 encodes a peptidylprolyl cis/trans isomerase homologous Concise description: fkb-7 encodes a peptidylprolyl cis/trans isomerase homologous to mammalian FK506-binding proteins; by homology, FKB-7 could function in a number of different processes including protein folding, signal transduction, and regulation of muscle contraction; however, as loss of fkb-7 function via RNA-mediated interferen…	FK506-Binding protein family
B0511.13	WBGene00015238	B0511.13	none available	not known
B0511.2	WBGene00015228	B0511.2	none available	not known
B0511.4	WBGene00015230	tag-344	none available	Temporarily Assigned Gene name
B0511.7	WBGene00015233	B0511.7	none available	not known
B0511.9	WBGene00015235	cdc-26	cdc-26 encodes, by alternative splicing, two isoforms of a Concise description: cdc-26 encodes, by alternative splicing, two isoforms of a probable anaphase-promoting complex/cyclosome (APC/C) component that has cryptic orthology to budding yeast Cdc26p, and that is required for normal meiosis and asymmetric one-cell embryonic division; although CDC-26 and Cdc26p have little obvious sequence simi…	Cell Division Cycle related
B0513.4	WBGene00007196	B0513.4	none available	not known
B0513.5	WBGene00007197	B0513.5	none available	not known
B0513.9	WBGene00007200	vamp-8	none available	VAMP (Vesicle Associated Membrane Protein) homolog
B0513.90	WBGene00235301	B0513.90	none available	not known
B0524.2	WBGene00015241	B0524.2	none available	not known
B0554.5	WBGene00015258	B0554.5	none available	not known
B0554.7	WBGene00015260	B0554.7	none available	not known
B0563.1	WBGene00015261	B0563.1	none available	not known
B0563.2	WBGene00006637	tsp-11	none available	TetraSPanin family
B0563.5	WBGene00015262	B0563.5	none available	not known
B0563.9	WBGene00044687	B0563.9	none available	not known
B0564.3	WBGene00007203	best-1	none available	BESTrophin (chloride channel) homolog
B0564.4	WBGene00007204	best-2	none available	BESTrophin (chloride channel) homolog
BE0003N10.2	WBGene00015267	chin-1	chin-1 encodes a putative GTPase activating protein (GAP) and Concise description: chin-1 encodes a putative GTPase activating protein (GAP) and is orthologous to vertebrate chimaerins; chin-1 negatively regulates CDC-42 during asymmetric division in the embryo; chin-1 restricts both the spatial extent of CDC-42 expression and the recruitment of NMY-2 during the phase in which polarity is maintai…	CHImaeriN (Rac-GTPase-activating protein) homolog
BE0003N10.3	WBGene00015268	BE0003N10.3	none available	not known
BE0003N10.6	WBGene00255598	BE0003N10.6	none available	not known
BE10.1	WBGene00007209	BE10.1	none available	not known
BE10.2	WBGene00007210	agmo-1	none available	AlkylGlycerol MonoOxygenase
BE10.3	WBGene00007211	BE10.3	none available	not known
BE10.4	WBGene00007212	BE10.4	none available	not known
C01A2.1	WBGene00007213	C01A2.1	none available	not known
C01A2.3	WBGene00007215	oxa-1	none available	OXA mitochondrial inner membrane insertase homolog
C01A2.7	WBGene00007219	nlp-38	none available	Neuropeptide-Like Protein
C01B10.1	WBGene00001091	drh-2	drh-2 was identified, along with drh-1, as a gene that can Concise description: drh-2 was identified, along with drh-1, as a gene that can encode a protein with similarity to DExH-box helicases; drh-2, however, is classified by WB as a pseudogene because it has two frameshifts, based on EST and RNASeq alignments; the first frameshift occurs in exon 4 and the second occurs in exon 8 of the current…	Dicer Related Helicase
C01B10.11	WBGene00044294	C01B10.11	C01B10.11 encodes a novel protein, conserved amongst nematodes; Concise description: C01B10.11 encodes a novel protein, conserved amongst nematodes; loss of C01B10.11 function via large-scale RNAi experiments indicates that C01B10.11 is required for coordinated locomotion and normal body morphology; expression studies	not known
C01B10.3	WBGene00015278	C01B10.3	C01B10.3 encodes a paralog of IPP-5, and thus may functionally Concise description: C01B10.3 encodes a paralog of IPP-5, and thus may functionally	not known
C01B10.5	WBGene00001858	hil-7	hil-7 encodes an H1 linker histone.	HIstone H1 Like
C01B10.7	WBGene00015281	C01B10.7	none available	not known
C01B12.1	WBGene00005017	sqt-2	none available	SQuaT
C01B12.4	WBGene00015287	osta-1	none available	Organic Solute Transporter Alpha-like protein
C01B12.5	WBGene00015288	best-4	none available	BESTrophin (chloride channel) homolog
C01B12.8	WBGene00015291	C01B12.8	none available	not known
C01B7.1	WBGene00006342	sup-37	none available	SUPpressor
C01C10.2	WBGene00015294	C01C10.2	none available	not known
C01C4.1	WBGene00003739	nlp-1	nlp-1 encodes a predicted neuropeptide-like protein of the Concise description: nlp-1 encodes a predicted neuropeptide-like protein of the MSFamide family with similarity to Aplysia californica (sea hare) buccalin, a neuropeptide that regulates acetylcholine-induced muscle contraction; NLP-1 is expressed in the phasmid PHB tail sensory neuron, lateral neurons, head neurons, and the intestine; the…	Neuropeptide-Like Protein
C01C4.3	WBGene00015293	C01C4.3	C01C4.3 encodes a serine/threonine protein kinase.	not known
C01F1.3	WBGene00015298	C01F1.3	none available	not known
C01F4.2	WBGene00015303	rga-6	none available	Rho GTPase Activating protein
C01F6.5	WBGene00000120	aly-1	aly-1 encodes an RRM motif-containing protein required for Concise description: aly-1 encodes an RRM motif-containing protein required for normal export of TRA-1/tra-2 mRNA complexes, and thus for normal hermaphroditism; ALY-1 is orthologous to human THOC4 (OMIM:604171), and paralogous to ALY-2 and ALY-3; in the absence of TRA-1, and in conjunction with NXF-2, ALY-1 and its paralog ALY-2 are requ…	Ref/ALY RNA export adaptor family
C01G10.10	WBGene00007237	C01G10.10	none available	not known
C01G10.15	WBGene00007240	C01G10.15	none available	not known
C01G10.17	WBGene00044658	C01G10.17	none available	not known
C01G10.6	WBGene00007233	C01G10.6	C01G10.6 encodes a predicted secreted or transmembrane protein Concise description: C01G10.6 encodes a predicted secreted or transmembrane protein that is rich in asparagine and tyrosine residues and which displays some similarity to the Staphylococcal secretory antigen ssaA2 precursor and Saccharomyces cerevisiae	not known
C01G12.4	WBGene00006939	wee-1.2	none available	WEE homolog
C01G12.6	WBGene00007246	nspb-10	none available	Nematode Specific Peptide family, group B
C01G12.7	WBGene00007247	C01G12.7	none available	not known
C01G12.8	WBGene00007248	catp-4	none available	Cation transporting ATPase
C01G12.9	WBGene00007249	C01G12.9	none available	not known
C01G5.3	WBGene00015305	C01G5.3	none available	not known
C01G5.7	WBGene00015309	C01G5.7	none available	not known
C01G5.8	WBGene00015310	fan-1	none available	Fanconi Anemia-associated Nuclease
C01G5.9	WBGene00015311	C01G5.9	none available	not known
C01G6.1	WBGene00000170	aqp-2	aqp-2 encodes, by alternative splicing, two isoforms of an Concise description: aqp-2 encodes, by alternative splicing, two isoforms of an biochemically atypical aquaglyceroporin; when expressed in Xenopus oocytes, AQP-2 increases water permeability 5- to 11-fold, and urea permeability 4.5-fold, but has no effect on glycerol permeability; AQP-2::GFP fusion proteins are expressed predominantly in …	AQuaPorin or aquaglyceroporin related
C01G6.3	WBGene00007225	C01G6.3	none available	not known
C01G6.8	WBGene00000289	cam-1	cam-1 encodes a receptor tyrosine kinase of the immunoglobulin Concise description: cam-1 encodes a receptor tyrosine kinase of the immunoglobulin superfamily that is orthologous to human ROR1 (OMIM:602336) and ROR2 (OMIM:602337, mutation of which leads to type B brachydactyly); cam-1 is required for locomotion, cell migration, asymmetric cell division, axon outgrowth, and dauer formation; CAM-1,…	CAN cell Migration defective
C01G6.9	WBGene00007229	C01G6.9	none available	not known
C01H6.7	WBGene00007256	swsn-9	none available	SWI/SNF nucleosome remodeling complex component
C01H6.9	WBGene00007258	hasp-1	hasp-1 encodes a homolog of vertebrate haploid germ cell-specific Concise description: hasp-1 encodes a homolog of vertebrate haploid germ cell-specific nuclear protein kinase (haspin); the hasp-1 tm3858 deletion mutation has been classified as lethal or sterile by the National Bioresource Project of Japan; HASP-1 specifically binds GOA-1 in yeast two-hybrid assays; HASP-1 is expressed in PHB sen…	HASPin kinase related
C02A12.1	WBGene00001781	gst-33	none available	Glutathione S-Transferase
C02A12.4	WBGene00003096	lys-7	lys-7 encodes an enzyme homologous to an antimicrobial lysozyme Concise description: lys-7 encodes an enzyme homologous to an antimicrobial lysozyme encoded by the LYS4 gene of the protozoan parasite Entamoeba histolytica; LYS-7 functions in the innate immune response as an antimicrobial enzyme that, by homology, hydrolyzes the 1,4-beta-linkages between N-acetyl-D-glucosamine and N-acetylmuramic …	LYSozyme
C02B10.2	WBGene00015327	snpn-1	none available	SNaPiN (synaptic protein) homolog
C02B10.4	WBGene00015329	C02B10.4	none available	not known
C02B8.3	WBGene00015322	C02B8.3	none available	not known
C02B8.6	WBGene00015324	C02B8.6	none available	not known
C02C2.1	WBGene00015332	tyr-1	C02C2.1 encodes a tyrosinase homolog with a glutamine/asparagine-rich Concise description: C02C2.1 encodes a tyrosinase homolog with a glutamine/asparagine-rich	TYRosinase
C02D4.1	WBGene00007262	jud-4	jud-4 encodes an unfamiliar protein, putatively secreted, that Concise description: jud-4 encodes an unfamiliar protein, putatively secreted, that is required both for normal sensitivity to ethanol and for survival after freezing and thawing; JUD-4 is expressed in hypodermis and vulval muscles; JUD-4 is orthologous to Brugia malayi Bm1_40315, but lacks obvious orthologies to non-nematode proteins…	JUDang (Korean for resistant to alcohol)
C02D5.1	WBGene00015335	acdh-6	none available	Acyl CoA DeHydrogenase
C02E11.1	WBGene00015344	nra-4	none available	Nicotinic Receptor Associated
C02E7.3	WBGene00005245	srh-20	none available	Serpentine Receptor, class H
C02E7.6	WBGene00015339	C02E7.6	none available	not known
C02E7.7	WBGene00015340	C02E7.7	none available	not known
C02F12.1	WBGene00006643	tsp-17	none available	TetraSPanin family
C02F12.3	WBGene00015354	snet-1	none available	snet (Suppressor of NEp Two)
C02F12.5	WBGene00015355	C02F12.5	C02F12.5 encodes a putatively secreted protein with a Kunitz/bovine Concise description: C02F12.5 encodes a putatively secreted protein with a Kunitz/bovine pancreatic trypsin inhibitor domain; C02F12.5 has no obvious function in mass	not known
C02F5.1	WBGene00002231	knl-1	knl-1 encodes a novel acidic protein with a coiled-coil region Concise description: knl-1 encodes a novel acidic protein with a coiled-coil region at its C-terminus; KNL-1 is an essential kinetochore component that is required for proper spindle elongation and chromosome separation, and in the kinetochore assembly pathway, plays a key role in linking the initiation of kinetochore formation with t…	Kinetochore NuLl
C02F5.5	WBGene00015348	C02F5.5	none available	not known
C02F5.8	WBGene00006627	tsp-1	none available	TetraSPanin family
C02G6.3	WBGene00044803	C02G6.3	none available	not known
C02H7.1	WBGene00001127	dyf-11	dyf-11 encodes a conserved protein that is orthologous to mammalian Concise description: dyf-11 encodes a conserved protein that is orthologous to mammalian IFT54 (MIP-T3, Traf3ip1) and that contains a lysine-rich region and a C-terminal coiled-coil domain present in a number of intraflagellar transport complex B (IFT-B) proteins; DYF-11 activity is required continuously in sensory neurons for fo…	abnormal DYe Filling
C03A3.1	WBGene00007266	C03A3.1	none available	not known
C03A3.3	WBGene00007268	C03A3.3	none available	not known
C03A3.9	WBGene00284849	C03A3.9	none available	not known
C03A7.1	WBGene00015365	C03A7.1	none available	not known
C03A7.10	WBGene00015368	srt-65	none available	Serpentine Receptor, class T
C03A7.4	WBGene00004099	abu-15	The protein product of this gene is predicted to contain a Concise description: The protein product of this gene is predicted to contain a glutamine/asparagine (Q/N)-rich ('prion') domain, by the algorithm of Michelitsch	Activated in Blocked Unfolded protein response
C03B1.14	WBGene00015382	C03B1.14	none available	not known
C03B1.2	WBGene00015373	C03B1.2	none available	not known
C03B1.6	WBGene00015377	C03B1.6	none available	not known
C03B8.3	WBGene00015386	C03B8.3	none available	not known
C03B8.4	WBGene00003002	lin-13	lin-13 encodes a large (2248-residue) nuclear protein with Concise description: lin-13 encodes a large (2248-residue) nuclear protein with multiple zinc fingers of the C2H2 class and a LXCXE retinoblastoma protein-binding motif, that is required for survival through larval development and for negative	abnormal cell LINeage
C03C10.1	WBGene00002202	kin-19	kin-19 encodes a serine/threonine kinase orthologous to Casein Concise description: kin-19 encodes a serine/threonine kinase orthologous to Casein Kinase I (CKI); in the early embryo, kin-19 is a component of both the non-canonical Wnt signaling pathway that regulates endoderm formation in the early embryo as well as the Wnt spindle orientation pathway; during larval development, kin-19 functions…	protein KINase
C03C10.3	WBGene00004392	rnr-2	rnr-2 encodes the small subunit of ribonucleotide reductase; Concise description: rnr-2 encodes the small subunit of ribonucleotide reductase; by homology, RNR-2 is predicted to function in deoxyribonucleotide biosynthesis; in C. elegans rnr-2 is an essential gene whose activity is required for reproduction	RiboNucleotide Reductase
C03C10.5	WBGene00007271	C03C10.5	none available	not known
C03C11.1	WBGene00007274	C03C11.1	none available	not known
C03C11.2	WBGene00001483	fog-3	fog-3 encodes a protein that has similarity, in its N-terminus, Concise description: fog-3 encodes a protein that has similarity, in its N-terminus, to the vertebrate Tob, BTG1, and BTG2 proteins that function in growth control and/or differentiation; in C. elegans, FOG-3 activity is required in the germ line throughout development for initiation and maintenance of spermatogenesis; fog-3 mRNA is …	Feminization Of Germline
C03D6.1	WBGene00007275	C03D6.1	none available	not known
C03D6.9	WBGene00219796	C03D6.9	none available	not known
C03E10.3	WBGene00007281	C03E10.3	none available	not known
C03E10.6	WBGene00007283	clec-222	none available	C-type LECtin
C03G5.10	WBGene00044338	nspc-3	none available	Nematode Specific Peptide family, group C
C03G5.11	WBGene00044339	nspc-4	none available	Nematode Specific Peptide family, group C
C03G5.12	WBGene00044340	nspc-5	none available	Nematode Specific Peptide family, group C
C03G5.2	WBGene00015392	nspc-7	none available	Nematode Specific Peptide family, group C
C03G5.7	WBGene00001448	flp-5	flp-5 encodes a predicted FMRFamide-like peptide neurotransmitter Concise description: flp-5 encodes a predicted FMRFamide-like peptide neurotransmitter that increases action potential frequency in the pharyngeal muscle when applied	FMRF-Like Peptide
C03G5.8	WBGene00023477	nspc-1	none available	Nematode Specific Peptide family, group C
C03G6.12	WBGene00015397	nhr-149	none available	Nuclear Hormone Receptor family
C03G6.13	WBGene00015398	tag-293	none available	Temporarily Assigned Gene name
C03G6.14	WBGene00015399	cyp-35A1	cyp-35A1 encodes one of over 80 C. elegans cytochrome P450s, Concise description: cyp-35A1 encodes one of over 80 C. elegans cytochrome P450s, NADPH-dependent monooxygenases that metabolize endogenous and exogenous compounds; RT-PCR experiments indicate that cyp-35A1 mRNA is upregulated in response to treatment with xenobiotics, such as PCBs (polychlorinated biphenyls) or PAHs (polycyclic aromati…	CYtochrome P450 family
C03G6.17	WBGene00015402	C03G6.17	none available	not known
C03G6.3	WBGene00005602	srj-14	none available	Serpentine Receptor, class J
C03G6.5	WBGene00015393	C03G6.5	none available	not known
C03G6.8	WBGene00015395	nhr-147	none available	Nuclear Hormone Receptor family
C03H12.3	WBGene00202227	C03H12.3	none available	not known
C03H5.10	WBGene00255736	C03H5.10	none available	not known
C04A11.2	WBGene00007286	C04A11.2	none available	not known
C04A11.3	WBGene00007287	gck-4	none available	Germinal Center Kinase family
C04A11.5	WBGene00007288	C04A11.5	none available	not known
C04A2.1	WBGene00015410	tbc-6	none available	TBC (Tre-2/Bub2/Cdc16) domain family
C04A2.15	WBGene00206529	C04A2.15	none available	not known
C04B4.2	WBGene00007290	C04B4.2	none available	not known
C04C3.2	WBGene00015412	lgc-9	none available	Ligand-Gated ion Channel
C04C3.5	WBGene00001119	dyf-3	dyf-3 encodes an ortholog of zebrafish cluap1 (also qilin, Concise description: dyf-3 encodes an ortholog of zebrafish cluap1 (also qilin, and like PKD2 required to suppress kidney cysts) and human clusterin-associated protein 1 (CLUAP1); DYF-3 is predicted to have two coiled-coil domains; DYF-3 is required for normal assembly of middle and distal ciliary segments, with dyf-3 mutants showing trun…	abnormal DYe Filling
C04C3.9	WBGene00195067	C04C3.9	none available	not known
C04E12.12	WBGene00015441	arrd-21	none available	ARRestin Domain protein
C04E12.2	WBGene00015433	C04E12.2	none available	not known
C04E12.4	WBGene00015434	C04E12.4	none available	not known
C04E6.12	WBGene00015426	C04E6.12	none available	not known
C04E6.13	WBGene00015427	C04E6.13	none available	not known
C04E6.5	WBGene00015422	C04E6.5	none available	not known
C04E6.7	WBGene00015423	C04E6.7	none available	not known
C04E6.8	WBGene00015424	C04E6.8	C04E6.8 encodes a novel protein with similarity, in its N-terminus, Concise description: C04E6.8 encodes a novel protein with similarity, in its N-terminus,	not known
C04F1.3	WBGene00002989	lim-7	lim-7 encodes one of seven C. elegans LIM-homeodomain (LIM-HD) Concise description: lim-7 encodes one of seven C. elegans LIM-homeodomain (LIM-HD) proteins and the sole C. elegans member of the Islet subclass of LIM-HD transcription factors; loss of lim-7 activity results in L1 larval lethality characterized by locomotion and morphological defects, a detached pharynx, body cavity vacuolization, a…	LIM domain family
C04F12.12	WBGene00077685	C04F12.12	none available	not known
C04F12.16	WBGene00219286	C04F12.16	none available	not known
C04F12.7	WBGene00007301	C04F12.7	none available	not known
C04F6.1	WBGene00006929	vit-5	vit-5 encodes a vitellogenin, a lipid-binding protein precursor Concise description: vit-5 encodes a vitellogenin, a lipid-binding protein precursor related to vertebrate vitellogenins and mammalian ApoB-100, a core LDL particle constituent; by homology, VIT-5 is predicted to function as a lipid transport protein; loss of vit-5 activity via large-scale RNA-mediated interference (RNAi) screens ind…	VITellogenin structural genes (yolk protein genes)
C04F6.3	WBGene00000503	cht-1	cht-1 encodes a chitinase orthologous to human chitinase-1 Concise description: cht-1 encodes a chitinase orthologous to human chitinase-1 (OMIM:600031, mutations are associated with chitotriosidase deficiency); CHT-1 is predicted to function as an extracellular O-glycosyl hydrolase that hydrolyzes the glycosidic bond between two or more carbohydrates; in C. elegans, CHT-1 may play a role in embr…	CHiTinase
C04F6.4	WBGene00006810	unc-78	unc-78 encodes a WD40 repeat-containing protein homologous Concise description: unc-78 encodes a WD40 repeat-containing protein homologous to actin-interacting protein (AIP1) that regulates the ordered assembly of actin and cofilin in myofibrils; homozygous unc-78 mutant animals are viable but exhibit disorganization of actin filaments in the body wall muscle; unc-78 and aipl-1 have redundant and…	UNCoordinated
C04F6.5	WBGene00000990	dhs-27	dhs-27 encodes a short-chain dehydrogenase predicted to be Concise description: dhs-27 encodes a short-chain dehydrogenase predicted to be	DeHydrogenases, Short chain
C04F6.7	WBGene00195081	C04F6.7	none available	not known
C04G2.1	WBGene00007304	ttr-39	none available	TransThyretin-Related family domain
C04G2.10	WBGene00007309	C04G2.10	none available	not known
C04G2.14	WBGene00255426	C04G2.14	none available	not known
C04G2.2	WBGene00007305	ttbk-5	none available	Tau TuBulin Kinase
C04G2.3	WBGene00014665	C04G2.3	none available	not known
C04G2.4	WBGene00003432	msp-36	msp-36 encodes a protein that belongs to a family of proteins Concise description: msp-36 encodes a protein that belongs to a family of proteins called the Major Sperm Proteins (MSPs) that is conserved in nematodes; this family comprises of closely related, small, basic proteins that make up 15% of sperm protein; this multigene family consists of over fifty genes, including many pseudogenes; MSP …	Major Sperm Protein
C04G2.5	WBGene00007306	C04G2.5	none available	not known
C04G2.8	WBGene00007307	spch-1	spch-1 encodes one of three C. elegans small, highly basic Concise description: spch-1 encodes one of three C. elegans small, highly basic proteins that have similarity to mouse testis-specific histone H1, the human nucleotide binding and splicing-associated protein SON, and the mollusk protamine-like SNBPs (sperm nuclear basic proteins); spch-1(RNAi) has been reported to result in low penetrance…	SPerm CHromatin enriched
C04G2.9	WBGene00007308	C04G2.9	none available	not known
C04G6.2	WBGene00015453	C04G6.2	none available	not known
C04G6.7	WBGene00015457	C04G6.7	none available	not known
C04H4.1	WBGene00007311	C04H4.1	none available	not known
C04H5.2	WBGene00007313	clec-147	none available	C-type LECtin
C04H5.7	WBGene00007315	C04H5.7	none available	not known
C04H5.8	WBGene00007316	nlp-41	none available	Neuropeptide-Like Protein
C05A2.1	WBGene00004083	pph-1	none available	Protein PHosphatase
C05A9.1	WBGene00003999	pgp-5	pgp-5 encodes a transmembrane protein that is a member of the Concise description: pgp-5 encodes a transmembrane protein that is a member of the P-glycoprotein subclass of the ATP-binding cassette (ABC) transporter superfamily; by homology, PGP-5 is predicted to function as an ATP-dependent efflux pump that protects C. elegans by exporting exogenous toxins; pgp-5 activity is required for defense …	P-GlycoProtein related
C05A9.2	WBGene00007317	C05A9.2	none available	not known
C05B5.11	WBGene00045242	C05B5.11	none available	not known
C05B5.2	WBGene00007320	C05B5.2	none available	not known
C05B5.5	WBGene00007322	C05B5.5	This gene encodes a protein containing an F-box, a motif predicted Concise description: This gene encodes a protein containing an F-box, a motif predicted to mediate protein-protein interactions either with homologs of yeast Skp-1p or	not known
C05B5.6	WBGene00007323	fbxa-155	none available	F-box A protein
C05B5.9	WBGene00023482	C05B5.9	none available	not known
C05C10.2	WBGene00007329	C05C10.2	none available	not known
C05C10.4	WBGene00007331	pho-11	none available	intestinal acid PHOsphatase
C05C10.5	WBGene00007332	C05C10.5	C05C10.5 encodes a novel protein that is conserved in C. remanei Concise description: C05C10.5 encodes a novel protein that is conserved in C. remanei and C. briggsae; large-scale RNAi screens have indicated that C05C10.5 activity is required for normal body morphology, chromosome segregation, and embryonic development; in situ hybridization experiments reveal that C05C10.5 mRNA is expressed in t…	not known
C05C10.8	WBGene00086567	C05C10.8	none available	not known
C05C12.1	WBGene00007335	C05C12.1	none available	not known
C05C12.4	WBGene00007336	C05C12.4	none available	not known
C05C12.5	WBGene00007337	C05C12.5	none available	not known
C05C12.6	WBGene00007338	C05C12.6	none available	not known
C05C8.4	WBGene00001563	gei-6	none available	GEX Interacting protein
C05C8.8	WBGene00015465	C05C8.8	none available	not known
C05C8.9	WBGene00015466	hyls-1	hyls-1 encodes a novel, conserved protein orthologous to human Concise description: hyls-1 encodes a novel, conserved protein orthologous to human HYLS1; in C. elegans, hyls-1 is required for initiation of ciliogenesis; hyls-1 is not required for intraflagellar transport nor for centriole assembly or centrosome function; HYLS-1 localizes to centrioles and to the base of mature cilia; HYLS-1 local…	HYLS1 (human HYdroLethalus Syndrome) homolog
C05D10.1	WBGene00015477	attf-4	none available	AT hook Transcription Factor family
C05D11.12	WBGene00002855	let-721	The let-721 gene encodes an ortholog of the human gene SIMILAR Concise description: The let-721 gene encodes an ortholog of the human gene SIMILAR TO ELECTRON-TRANSFERRING-FLAVOPROTEIN DEHYDROGENASE (ETFDH), which when mutated	LEThal
C05D11.4	WBGene00002881	let-756	let-756 encodes an fibroblast growth factor (FGF)-like ligand Concise description: let-756 encodes an fibroblast growth factor (FGF)-like ligand that is required for progression through early larval development; LET-756 is expressed from late embryogenesis to adulthood, with a peak of expression in larvae; with EGL-17, LET-756 is redundantly required to activate EGL-15/FGFR, which in turn activat…	LEThal
C05D11.6	WBGene00003523	nas-4	nas-4 encodes a predicted extracellular matrix metalloprotease Concise description: nas-4 encodes a predicted extracellular matrix metalloprotease of the M12A (astacin) family that contains an N-terminal signal sequence and a catalytic domain, but no recognizable regulatory domains in the C-terminus; as loss of nas-4 activity via RNAi results in no obvious abnormalities, the precise role of NAS-4…	Nematode AStacin protease
C05D12.1	WBGene00007339	C05D12.1	none available	not known
C05D12.2	WBGene00007340	C05D12.2	none available	not known
C05D12.4	WBGene00007341	C05D12.4	none available	not known
C05D12.5	WBGene00007342	C05D12.5	none available	not known
C05D12.7	WBGene00044029	C05D12.7	none available	not known
C05D2.6	WBGene00015468	madf-11	C05D2.6 encodes an unfamiliar protein, with no known non-nematode Concise description: C05D2.6 encodes an unfamiliar protein, with no known non-nematode homologs, that specifically binds GOA-1 in yeast two-hybrid assays; C05D2.6 is expressed in several head and tail neurons, pharyngeal muscle, intestine, distal tip cell of the gonad, with weak expression in the ventral nerve cord; C05D2.6 is requ…	MADF domain transcription factor
C05D2.8	WBGene00015469	C05D2.8	none available	not known
C05D9.3	WBGene00015472	C05D9.3	none available	not known
C05D9.4	WBGene00015473	C05D9.4	none available	not known
C05D9.5	WBGene00002062	ife-4	The ife-4 gene encodes a member of the Initiation Factor 4E Concise description: The ife-4 gene encodes a member of the Initiation Factor 4E	Initiation Factor 4E (eIF4E) family
C05D9.7	WBGene00015474	C05D9.7	none available	not known
C05D9.9	WBGene00015476	C05D9.9	none available	not known
C05E11.3	WBGene00015494	C05E11.3	none available	not known
C05E11.4	WBGene00000133	amt-1	amt-1 encodes a transmembrane transporter that by homology, Concise description: amt-1 encodes a transmembrane transporter that by homology, is predicted to transport ammonium ions across the plasma membrane; as loss of amt-1 activity via large-scale RNAi screens does not result in any obvious abnormalities,	AMmonium Transporter homolog
C05E11.6	WBGene00015495	C05E11.6	none available	not known
C05E11.7	WBGene00015496	C05E11.7	none available	not known
C05E11.8	WBGene00001455	flp-12	flp-12 encodes a predicted FMRFamide-like peptide neurotransmitter Concise description: flp-12 encodes a predicted FMRFamide-like peptide neurotransmitter that affects locomotion when injected into A. suum; expressed in the ASE and PVM	FMRF-Like Peptide
C05E7.3	WBGene00007345	C05E7.3	none available	not known
C05G5.5	WBGene00007351	C05G5.5	none available	not known
C05G5.6	WBGene00002285	let-7	let-7 encodes a 21-nucleotide microRNA (also known as a small Concise description: let-7 encodes a 21-nucleotide microRNA (also known as a small temporal RNA, or stRNA) that is conserved in bilateral animal species (including vertebrates, ascidians, hemichordates, molluscs, annelids and arthropods), but is not found in cnidarians, poriferans, fungi, plants, protists, archaea, or bacteria; let-7 i…	LEThal
C05G6.1	WBGene00015497	nhr-76	none available	Nuclear Hormone Receptor family
C06A1.3	WBGene00007354	C06A1.3	none available	not known
C06A1.4	WBGene00014667	C06A1.4	none available	not known
C06A1.5	WBGene00007355	rpb-6	none available	RNA Polymerase II (B) subunit
C06A12.5	WBGene00007358	lact-6	lact-6 encodes a beta-lactamase domain-containing protein that Concise description: lact-6 encodes a beta-lactamase domain-containing protein that	beta-LACTamase domain containing
C06A5.2	WBGene00015500	C06A5.2	none available	not known
C06A5.5	WBGene00015503	C06A5.5	none available	not known
C06A5.6	WBGene00015504	C06A5.6	none available	not known
C06A5.9	WBGene00004380	rnf-1	none available	RiNg Finger protein
C06A6.2	WBGene00015507	C06A6.2	none available	not known
C06A6.3	WBGene00015508	mvb-12	mvb-12 encodes a protein containing a domain of unknown function Concise description: mvb-12 encodes a protein containing a domain of unknown function (DUF2464) that is the metazoan homolog of Saccharomyces cerevisiae Mvb12p, a member of the endosomal sorting ESCRT-I complex that functions in endosomal sorting of mono-ubiquitinated membrane proteins; in C. elegans, MVB-12 is a non-essential compo…	MVB (yeast MultiVesicular Body sorting factor) related
C06A6.7	WBGene00015511	C06A6.7	none available	not known
C06A8.5	WBGene00015515	spdl-1	spdl-1 encodes a coiled-coil protein; RNAi screens indicate Concise description: spdl-1 encodes a coiled-coil protein; RNAi screens indicate that spdl-1 activity is required for proper chromosome segregation, embryonic development,	SPinDLy (Drosophila chromosome segregation) homolog
C06A8.6	WBGene00015516	C06A8.6	none available	not known
C06A8.9	WBGene00001615	glr-4	glr-4 encodes a putative non-NMDA ionotropic glutamate receptor Concise description: glr-4 encodes a putative non-NMDA ionotropic glutamate receptor subunit, most closely related to GLR-3 and less so to GLR-7, possibly of the kainate subfamily; glr-4 is expressed in various sensory neurons and interneurons from embyrogenesis	GLutamate Receptor family (AMPA)
C06B3.6	WBGene00007365	C06B3.6	none available	not known
C06B3.7	WBGene00007366	C06B3.7	none available	not known
C06B8.1	WBGene00007367	nhr-150	none available	Nuclear Hormone Receptor family
C06B8.2	WBGene00007368	C06B8.2	none available	not known
C06B8.4	WBGene00007370	str-264	none available	Seven TM Receptor
C06C3.1	WBGene00003196	mel-11	mel-11 encodes the C. elegans ortholog of the vertebrate smooth Concise description: mel-11 encodes the C. elegans ortholog of the vertebrate smooth muscle myosin-associated phosphatase regulatory subunit (PP-1M); during development, mel-11 activity negatively regulates embryonic morphogenesis, and genetic analysis suggests that mel-11 acts with let-502, and in parallel to fem-2, in one of two re…	Maternal Effect Lethal
C06C3.11	WBGene00045404	C06C3.11	none available	not known
C06C3.3	WBGene00007374	C06C3.3	none available	not known
C06C3.4	WBGene00007375	C06C3.4	none available	not known
C06C3.8	WBGene00007378	C06C3.8	none available	not known
C06C6.8	WBGene00007382	C06C6.8	none available	not known
C06E1.1	WBGene00015518	C06E1.1	none available	not known
C06E1.11	WBGene00015526	C06E1.11	none available	not known
C06E1.7	WBGene00015522	C06E1.7	none available	not known
C06E2.5	WBGene00015529	C06E2.5	none available	not known
C06E2.9	WBGene00044579	C06E2.9	none available	not known
C06E4.3	WBGene00015532	C06E4.3	none available	not known
C06E4.6	WBGene00015535	C06E4.6	none available	not known
C06E4.7	WBGene00015536	glb-2	glb-2 encodes a globin; glb-2 transcription is higher in L3 Concise description: glb-2 encodes a globin; glb-2 transcription is higher in L3	GLoBin related
C06E7.4	WBGene00015541	C06E7.4	none available	not known
C06E7.6	WBGene00004973	spe-27	spe-27 encodes a novel, hydrophilic protein; spe-27 is required Concise description: spe-27 encodes a novel, hydrophilic protein; spe-27 is required for hermaphrodite spermatogenesis or sperm activation but not for male-derived sperm activation (sperm activation is the morphogenesis of a round non-motile spermatid to an amoeboid crawling sperm); however, mutant hermaphrodite spe-27 spermatids can…	defective SPErmatogenesis
C06E7.88	WBGene00189995	C06E7.88	none available	not known
C06E8.3	WBGene00004182	prk-1	none available	Pim (mammalian oncogene) Related Kinase
C06G1.1	WBGene00015545	C06G1.1	none available	not known
C06G1.2	WBGene00015546	C06G1.2	none available	not known
C06G1.4	WBGene00015547	ain-1	ain-1 encodes an unfamiliar protein synergistically required, Concise description: ain-1 encodes an unfamiliar protein synergistically required, with LIN-31, for the normal timing of vulval differentiation, independently of LET-60/RAS, and parallel to or downstream of LIN-14/LIN-28/HBL-1; AIN-1 is expressed in cytoplasmic foci (that are probably P bodies) in several tissues, including vulval prec…	ALG-1 INteracting protein
C06G3.2	WBGene00002228	klp-18	klp-18 encodes a kinesin motor protein whose motor domain is Concise description: klp-18 encodes a kinesin motor protein whose motor domain is most similar to that of the Xenopus and human klp2 proteins; loss of klp-18 activity via RNAi indicates that KLP-18 is required for the assembly of a disordered array of acentrosomal (female meiotic) microtubules into an organized, functional, bipolar spin…	Kinesin-Like Protein
C06G3.3	WBGene00015549	C06G3.3	none available	not known
C06G4.4	WBGene00015558	C06G4.4	none available	not known
C06G4.5	WBGene00015559	npr-17	none available	NeuroPeptide Receptor family
C06H2.2	WBGene00007386	C06H2.2	none available	not known
C06H2.7	WBGene00007391	C06H2.7	none available	not known
C06H5.10	WBGene00235139	C06H5.10	none available	not known
C06H5.8	WBGene00044795	C06H5.8	none available	not known
C07A12.2	WBGene00015560	C07A12.2	none available	not known
C07A12.4	WBGene00003963	pdi-2	pdi-2 encodes a protein disulfide isomerase beta subunit; by Concise description: pdi-2 encodes a protein disulfide isomerase beta subunit; by homology, PDI-2 is predicted to function in oxidative protein folding in the endoplasmic reticulum (ER); PDI-2 activity is required for several organismal processes including body morphology, locomotion, fertility, molting, and collagen deposition; pdi-2 t…	Protein Disulfide Isomerase
C07A12.5	WBGene00005008	spr-3	none available	Suppressor of PResenilin defect
C07A4.2	WBGene00007397	C07A4.2	none available	not known
C07A9.13	WBGene00044227	C07A9.13	none available	not known
C07A9.2	WBGene00007400	bud-31	none available	BUD morphology abnormal gene homolog
C07A9.8	WBGene00007404	best-5	none available	BESTrophin (chloride channel) homolog
C07B5.3	WBGene00007408	C07B5.3	none available	not known
C07B5.6	WBGene00007410	C07B5.6	none available	not known
C07D10.4	WBGene00003526	nas-7	nas-7 encodes an astacin-like metalloprotease; a NAS-7::GFP Concise description: nas-7 encodes an astacin-like metalloprotease; a NAS-7::GFP reporter fusion is first expressed in embryos just prior to hatching and, in adult animals, is seen in anterior cells adjacent to the pharyngeal metacarpus and terminal	Nematode AStacin protease
C07D10.5	WBGene00015569	C07D10.5	none available	not known
C07E3.1	WBGene00007412	stip-1	none available	STIP (Septin and Tuftelin Interacting Protein) homolog
C07E3.10	WBGene00007420	C07E3.10	none available	not known
C07E3.4	WBGene00007415	C07E3.4	none available	not known
C07E3.5	WBGene00007416	ceh-57	ceh-57 is a divergent homeobox gene that encodes one homeodomain; Concise description: ceh-57 is a divergent homeobox gene that encodes one homeodomain; most homeodomain proteins bind DNA and function as transcription factors; ceh-57	C. Elegans Homeobox
C07E3.6	WBGene00007417	ceh-58	ceh-58 is a divergent homeobox gene encoding one homeodomain; Concise description: ceh-58 is a divergent homeobox gene encoding one homeodomain; most homeodomain proteins bind DNA and function as transcription factors; ceh-58 is expressed in the ventral nerve cord, nerve ring, dorsal nerve cord, head neurons,	C. Elegans Homeobox
C07F11.1	WBGene00006593	tol-1	tol-1 encodes a predicted transmembrane protein that is the Concise description: tol-1 encodes a predicted transmembrane protein that is the sole C. elegans Toll-like receptor (TLR); TOL-1 is required for proper embryonic development and for pathogen avoidance behavior, and is expressed primarily in the	TOLl (Drosophila) family
C07G1.1	WBGene00006620	svh-1	svh-1 encodes a homolog of human TRYP1 and ELA2; mutation of Concise description: svh-1 encodes a homolog of human TRYP1 and ELA2; mutation of human TRYP1 or ELA2 leads, respectively, to hereditary pancreatitis (OMIM:276000)	Suppressor of VHp-1 deletion lethality
C07G1.15	WBGene00235296	C07G1.15	none available	not known
C07G1.6	WBGene00015572	C07G1.6	none available	not known
C07G3.10	WBGene00015578	C07G3.10	none available	not known
C07G3.15	WBGene00269378	C07G3.15	none available	not known
C07G3.2	WBGene00015574	irg-1	irg-1 encodes a protein containing a conserved DUF1768 domain, Concise description: irg-1 encodes a protein containing a conserved DUF1768 domain, a domain of unknown function found as a stand-alone domain in bacterial and bacteriophage proteins as well as fused to proteins involved in riboflavin biosynthesis in bacteria and plants; irg-1 expression is induced in response to infection with pathog…	Infection Response Gene
C07H4.2	WBGene00000532	clh-5	The clh-5 gene encodes a chloride channel, whose human homologs Concise description: The clh-5 gene encodes a chloride channel, whose human homologs	CLC-type chloride cHannel
C07H6.9	WBGene00015582	C07H6.9	none available	not known
C08A9.1	WBGene00004932	sod-3	sod-3 encodes a iron/manganese superoxide dismutase, predicted Concise description: sod-3 encodes a iron/manganese superoxide dismutase, predicted to be mitochondrial, that might defend against oxidative stress and promote normal lifespan; sod-3 mRNA levels are diminished by mutation of daf-16 and chromatin immunoprecipitation (ChIP) studies demonstrate that DAF-16 can directly bind the sod-3 pro…	SOD (superoxide dismutase)
C08A9.10	WBGene00044773	C08A9.10	none available	not known
C08A9.7	WBGene00015587	sdz-2	none available	SKN-1 Dependent Zygotic transcript
C08A9.8	WBGene00015588	C08A9.8	none available	not known
C08B11.2	WBGene00001835	hda-2	hda-2 encodes a Class I histone deacetylase; by homology, HDA-2 Concise description: hda-2 encodes a Class I histone deacetylase; by homology, HDA-2 is predicted to function in deacetylation of histone residues and transcriptional regulation; loss of hda-2 activity via RNAi results in an increased spontaneous	Histone DeAcetylase
C08B11.3	WBGene00007433	swsn-7	none available	SWI/SNF nucleosome remodeling complex component
C08B11.5	WBGene00004723	sap-49	sap-49 encodes the C. elegans ortholog of mammalian SAP49, Concise description: sap-49 encodes the C. elegans ortholog of mammalian SAP49, a component of the SF3b splicing factor, a U2 snRNP-associated protein complex; loss of sap-49 activity via RNAi results in embryonic lethality, a protruding vulva, reduced levels of gene expression (as assessed by a gfp reporter), and early onset of foci form…	Spliceosome-Associated Protein
C08B6.1	WBGene00007422	ugt-17	none available	UDP-GlucuronosylTransferase
C08B6.10	WBGene00007430	C08B6.10	none available	not known
C08B6.11	WBGene00007431	C08B6.11	none available	not known
C08B6.15	WBGene00077449	C08B6.15	none available	not known
C08B6.2	WBGene00007423	C08B6.2	none available	not known
C08B6.4	WBGene00007425	C08B6.4	none available	not known
C08B6.7	WBGene00007428	wdr-20	none available	WD Repeat protein
C08C3.3	WBGene00003102	mab-5	mab-5 encodes a homeodomain transcription factor related to Concise description: mab-5 encodes a homeodomain transcription factor related to the Antennapedia, Ultrabithorax, and abdominal-A family of homeodomain proteins; during postembryonic development, mab-5 is required cell autonomously for specification of posterior cell fates, including hypodermal and neuronal fates, programmed cell deaths,…	Male ABnormal
C08D8.7	WBGene00235325	C08D8.7	none available	not known
C08E3.1	WBGene00015593	C08E3.1	none available	not known
C08E3.10	WBGene00015602	fbxa-158	This gene encodes a protein containing an F-box, a motif predicted Concise description: This gene encodes a protein containing an F-box, a motif predicted to mediate protein-protein interactions either with homologs of yeast Skp-1p or with other proteins; this gene's encoded protein also contains an FTH/DUF38 motif,	F-box A protein
C08E3.5	WBGene00015597	fbxa-162	This gene encodes a protein containing an F-box, a motif predicted Concise description: This gene encodes a protein containing an F-box, a motif predicted to mediate protein-protein interactions either with homologs of yeast Skp-1p or with other proteins; this gene's encoded protein also contains an FTH/DUF38 motif,	F-box A protein
C08E3.6	WBGene00015598	fbxa-163	This gene encodes a protein containing an F-box, a motif predicted Concise description: This gene encodes a protein containing an F-box, a motif predicted to mediate protein-protein interactions either with homologs of yeast Skp-1p or with other proteins; this gene's encoded protein also contains an FTH/DUF38 motif,	F-box A protein
C08E3.7	WBGene00015599	fbxa-164	This gene encodes a protein containing an F-box, a motif predicted Concise description: This gene encodes a protein containing an F-box, a motif predicted to mediate protein-protein interactions either with homologs of yeast Skp-1p or with other proteins; this gene's encoded protein also contains an FTH/DUF38 motif,	F-box A protein
C08E8.10	WBGene00077692	C08E8.10	none available	not known
C08E8.11	WBGene00119201	C08E8.11	none available	not known
C08E8.4	WBGene00007440	C08E8.4	none available	not known
C08F1.10	WBGene00015613	C08F1.10	none available	not known
C08F1.11	WBGene00044417	C08F1.11	none available	not known
C08F1.12	WBGene00269389	C08F1.12	none available	not known
C08F1.3	WBGene00015607	fbxb-13	This gene encodes a protein containing an F-box, a motif predicted Concise description: This gene encodes a protein containing an F-box, a motif predicted to mediate protein-protein interactions either with homologs of yeast Skp-1p or with other proteins; its encoded protein also contains a Pfam-B45 motif of presently	F-box B protein
C08F1.6	WBGene00015610	C08F1.6	none available	not known
C08F11.1	WBGene00007450	C08F11.1	none available	not known
C08F11.11	WBGene00007458	ule-4	none available	Uterine Lumin Expressed/locailized
C08F11.12	WBGene00007459	C08F11.12	none available	not known
C08F11.3	WBGene00007452	C08F11.3	none available	not known
C08F11.8	WBGene00007455	ugt-22	none available	UDP-GlucuronosylTransferase
C08F8.15	WBGene00219217	C08F8.15	none available	not known
C08F8.4	WBGene00007446	mboa-4	mboa-4 encodes a putative transmembrane O-acyl transferase Concise description: mboa-4 encodes a putative transmembrane O-acyl transferase (MBOAT) orthologous to human MBOAT1 (OMIM:611732), and paralogous to C54G7.2 and ZK550.1; MBOA-4 has no obvious function in mass RNAi assays, and mboa-4(RNAi) animals incorporate exogenous arachidonic acid into phosphatidylcholine (PC), phosphatidylserine	Membrane Bound O-Acyl transferase, MBOAT
C08F8.6	WBGene00007448	C08F8.6	none available	not known
C08G9.2	WBGene00015620	C08G9.2	none available	not known
C08H9.11	WBGene00007470	chil-5	none available	CHItinase-Like
C08H9.3	WBGene00007464	C08H9.3	none available	not known
C08H9.4	WBGene00007465	chil-1	none available	CHItinase-Like
C08H9.5	WBGene00003862	old-1	old-1 encodes a receptor protein tyrosine kinase; old-1 plays Concise description: old-1 encodes a receptor protein tyrosine kinase; old-1 plays a role in stress resistance and regulation of adult lifespan; Murakami and Johnson showed that old-1 mRNA levels are upregulated in response to stress and in daf-2 and age-1 mutant backgrounds and that overexpression of old-1 in wild-type animals results…	Overexpression Longevity Determinant
C08H9.7	WBGene00007467	chil-3	none available	CHItinase-Like
C08H9.9	WBGene00014673	C08H9.9	none available	not known
C09B8.3	WBGene00015622	C09B8.3	none available	not known
C09B8.4	WBGene00015623	C09B8.4	none available	not known
C09B8.5	WBGene00015624	C09B8.5	none available	not known
C09B8.7	WBGene00003911	pak-1	pak-1 encodes, by alternative splicing, at least five isoforms Concise description: pak-1 encodes, by alternative splicing, at least five isoforms of a putative p21-activated kinase orthologous to human PAK1, PAK2 (OMIM:?), and PAK3 (OMIM:300142, mutated in nonsyndromic mental retardation); PAK-1 is required (redundantly with its paralog, MAX-2) for normal axonal guidance of motoneurons, P cell m…	P21-Activated Kinase family
C09B8.8	WBGene00015625	C09B8.8	none available	not known
C09B9.2	WBGene00015627	C09B9.2	none available	not known
C09B9.4	WBGene00015629	C09B9.4	none available	not known
C09B9.6	WBGene00003448	msp-55	msp-55 encodes a member of the major sperm protein family.	Major Sperm Protein
C09D4.2	WBGene00015633	C09D4.2	none available	not known
C09D4.3	WBGene00015634	C09D4.3	none available	not known
C09E7.10	WBGene00044295	C09E7.10	none available	not known
C09E7.2	WBGene00004102	pqn-10	PQN-10 encodes an unfamiliar protein, with limited similarity Concise description: PQN-10 encodes an unfamiliar protein, with limited similarity	Prion-like-(Q/N-rich)-domain-bearing protein
C09E7.4	WBGene00015638	C09E7.4	none available	not known
C09E8.2	WBGene00015645	lips-7	none available	LIPaSe related
C09E8.3	WBGene00015646	mlt-10	mlt-10 encodes a nematode-specific protein that contains a Concise description: mlt-10 encodes a nematode-specific protein that contains a domain of unknown function, DUF644, and tandem proline- and hydroxy amino acid-rich repeats; mlt-10 is required for proper execution of the molting cycle, as well as a number of other processes including normal body shape, locomotion, and reproduction; MLT-10 …	MoLTing defective
C09F12.3	WBGene00007483	C09F12.3	none available	not known
C09F5.3	WBGene00015649	C09F5.3	none available	not known
C09F9.1	WBGene00007478	C09F9.1	none available	not known
C09F9.2	WBGene00007479	C09F9.2	none available	not known
C09G1.2	WBGene00007484	C09G1.2	none available	not known
C09G12.1	WBGene00015651	ceh-53	ceh-53 encodes a paired-like homeodomain protein of the K50 Concise description: ceh-53 encodes a paired-like homeodomain protein of the K50	C. Elegans Homeobox
C09G12.5	WBGene00015655	C09G12.5	none available	not known
C09G12.9	WBGene00015658	tsg-101	tsg-101 encodes the C. elegans ortholog of S. cerevisiae vacuolar Concise description: tsg-101 encodes the C. elegans ortholog of S. cerevisiae vacuolar protein sorting protein Vps23p and human TUMOR SUSCEPTIBILITY GENE 101 (TSG101; OMIM:601387), mutations in which are associated with several types of cancer and with varying responses to HIV infection; TSG-101 is an essential component of the C. …	Tumor Susceptibility Gene homolog
C09G4.1	WBGene00002043	hyl-1	hyl-1 encodes a ceramide synthase orthologous to Saccharomyces Concise description: hyl-1 encodes a ceramide synthase orthologous to Saccharomyces cerevisiae Lag1p (longevity assurance gene), a protein preferentially expressed in young yeasts; by homology, HYL-1 is predicted to have several possible functions, including regulation of lipid, particularly ceramide, biosynthesis, regulation of	Homolog of Yeast Longevity gene
C09G4.3	WBGene00001051	cks-1	A homolog of Cks/Suc1, a highly conserved member of the eukaryotic Concise description: A homolog of Cks/Suc1, a highly conserved member of the eukaryotic cell cycle machinery that affects both meiosis and mitosis and has a role in the	Cyclin-dependent protein Kinase (CDC28) regulatory Subunit
C09G4.4	WBGene00044001	C09G4.4	none available	not known
C09G4.5	WBGene00003224	mes-6	mes-6 encodes a WD repeat-containing protein that is orthologous Concise description: mes-6 encodes a WD repeat-containing protein that is orthologous to Drosophila Extra sex combs (Esc); as a member of a Polycomb-like chromatin repressive complex with MES-2 and MES-3, MES-6 is required maternally for normal germline development and during larval development, for anteroposterior patterning; durin…	Maternal Effect Sterile
C09G5.1	WBGene00001586	ggr-1	ggr-1 encodes a predicted member of the GABA/ glycine receptor Concise description: ggr-1 encodes a predicted member of the GABA/ glycine receptor family of ligand-gated chloride channels that affects thermotaxis; expressed in AIB, PVR, PVQ, AVH, and SMDV neurons and in some motor neurons in the ventral cord,	GABA/Glycine Receptor family (see gbr)
C09G5.4	WBGene00000616	col-39	col-39 encodes a collagen that is individually dispensable Concise description: col-39 encodes a collagen that is individually dispensable for viability and gross morphology in mass RNAi screens; the amino- and carboxyl-terminal cysteine-rich regions of COL-39 are most closely related to those of COL-8, COL-19,	COLlagen
C09G5.5	WBGene00000656	col-80	none available	COLlagen
C09G5.6	WBGene00000251	bli-1	The bli-1 gene encodes an unusual cuticular collagen that is Concise description: The bli-1 gene encodes an unusual cuticular collagen that is required for proper strut formation within the unique medial layer of the adult cuticle; bli-1 interacts genetically with other cuticular collagens such as bli-2 and rol-1, and may be processed for secretion by BLI-4, a Kex2/subtilisin serine endoproteinas…	BLIstered cuticle
C09G9.4	WBGene00006409	hdl-2	tag-19 superficially resembles aromatic-L-amino-acid/L-histidine Concise description: tag-19 superficially resembles aromatic-L-amino-acid/L-histidine decarboxylases; however, it is distantly related, being no closer to them than to glutamine decarboxylase/sphingosinge lyase (e.g., tag-38, spl-1); tag-19 thus might be termed a Pyridoxal-phosphate (PLP) dependent decarboxylase-like protei, but is …	Histidine Decarboxyase Like
C09G9.5	WBGene00007495	C09G9.5	none available	not known
C09G9.6	WBGene00003864	oma-1	oma-1 encodes a zinc finger protein of the TIS11 finger type Concise description: oma-1 encodes a zinc finger protein of the TIS11 finger type that is paralogous to OMA-2; while either oma-1 or oma-2 individually have no obvious mutant phenotype, oma-1 and oma-2 doubly mutant animals show defects in oocyte maturation, indicating that the two genes function redundantly in this process; whereas nor…	Oocyte MAturation defective
C09H10.13	WBGene00198692	C09H10.13	none available	not known
C09H10.2	WBGene00004454	rpl-36.A	none available	Ribosomal Protein, Large subunit
C09H10.7	WBGene00007501	apc-17	none available	Anaphase Promoting Complex; see also mat
C09H10.8	WBGene00007502	glb-4	glb-4 encodes a globin; glb-4 transcription is higher in L3 Concise description: glb-4 encodes a globin; glb-4 transcription is higher in L3 and dauers than in young adults; glb-4 is required for embryonic viability, fertility,	GLoBin related
C09H10.9	WBGene00007503	C09H10.9	none available	not known
C09H5.2	WBGene00015660	catp-3	none available	Cation transporting ATPase
C09H5.7	WBGene00015661	C09H5.7	none available	not known
C10A4.1	WBGene00015662	C10A4.1	none available	not known
C10A4.10	WBGene00050957	C10A4.10	none available	not known
C10A4.5	WBGene00015666	gad-2	none available	GAstrulation Defective
C10A4.9	WBGene00045456	C10A4.9	none available	not known
C10C5.2	WBGene00007506	C10C5.2	none available	not known
C10C5.3	WBGene00007507	C10C5.3	none available	not known
C10C5.5	WBGene00007509	C10C5.5	none available	not known
C10C5.7	WBGene00007511	C10C5.7	none available	not known
C10C6.2	WBGene00007006	npr-3	C10C6.2 encodes a G-protein-coupled receptor for the FMRFamide-related Concise description: C10C6.2 encodes a G-protein-coupled receptor for the FMRFamide-related peptides (FaRPs) encoded by flp-15; C10C6.2 is primarily coupled to Gi/Go proteins, since C10C6.2 signalling is blocked by pertussis toxin; because of its link to Gi/Go	NeuroPeptide Receptor family
C10E2.1	WBGene00015672	C10E2.1	none available	not known
C10E2.5	WBGene00015675	C10E2.5	none available	not known
C10F3.2	WBGene00000979	dhs-16	dhs-16 encodes a short-chain dehydrogenase predicted to be Concise description: dhs-16 encodes a short-chain dehydrogenase predicted to be	DeHydrogenases, Short chain
C10F3.3	WBGene00000069	acy-2	acy-2 encodes an adenylyl cyclase; an intragenic deletion of Concise description: acy-2 encodes an adenylyl cyclase; an intragenic deletion of acy-2 is lethal at the first larval stage of development; the terminal phenotype	Adenylyl CYclase
C10F3.7	WBGene00015679	C10F3.7	none available	not known
C10G11.7	WBGene00015687	chdp-1	none available	Calponin Homology Domain containing Protein
C10G11.8	WBGene00015688	C10G11.8	none available	not known
C10G11.9	WBGene00015689	spch-2	spch-2 encodes one of three C. elegans small, highly basic Concise description: spch-2 encodes one of three C. elegans small, highly basic proteins that have similarity to mouse testis-specific histone H1, the human nucleotide-binding and splicing-associated protein SON, and the mollusk protamine-like SNBPs (sperm nuclear basic proteins); SPCH-2 associates specifically with spermatogenic meiotic	SPerm CHromatin enriched
C10G8.4	WBGene00015683	C10G8.4	C10G8.4 encodes a putative secreted TIL-domain protease inhibitor Concise description: C10G8.4 encodes a putative secreted TIL-domain protease inhibitor paralogous to SWM-1, ISL-1, and the products of 11 other C. elegans genes; C10G8.4 and its relatives are collectively similar to other TIL-domain protease inhibitors from nematodes, insects, and vertebrates; C10G8.4 has no obvious function in mass	not known
C10G8.6	WBGene00000455	ceh-34	ceh-34 encodes a homeodomain protein, homologous to human SIX2 Concise description: ceh-34 encodes a homeodomain protein, homologous to human SIX2 (OMIM:604994); ceh-34 activity is required for regulation of the programmed cell death of a pharyngeal neuron, the sister of the M4 motor neuron; CEH-34 binds the egl-1 5'-regulatory region in vitro and acts together with EYA-1, with which it physicall…	C. Elegans Homeobox
C10H11.10	WBGene00015698	kca-1	none available	Kinesin Cargo Adaptor
C10H11.4	WBGene00015693	ugt-28	none available	UDP-GlucuronosylTransferase
C10H11.7	WBGene00015696	C10H11.7	none available	not known
C10H11.9	WBGene00002694	let-502	let-502 encodes a Rho-binding Ser/Thr kinase orthologous to Concise description: let-502 encodes a Rho-binding Ser/Thr kinase orthologous to human myotonic dystrophy kinase (DM-kinase); let-502 is required for early embryonic cleavages, embryonic elongation, migration of hypodermal P cells to a ventral position, normal spermathecal contraction, and fertility; LET-502 is required for hypodermal ce…	LEThal
C11D2.3	WBGene00015701	C11D2.3	none available	not known
C11D9.1	WBGene00015704	tiam-1	none available	TIAM (mammalian Tumor Invasion And Metastasis factor) homolog
C11E4.1	WBGene00007516	gpx-5	gpx-5 encodes a glutathione peroxidase; by homology, GPX-5 Concise description: gpx-5 encodes a glutathione peroxidase; by homology, GPX-5 is predicted to function to reduce lipid hydroperoxides to their corresponding alcohols and reduce hydrogen peroxide to water to protect cells from damage induced by reactive	Glutathione PeroXidase
C11E4.2	WBGene00007517	gpx-3	none available	Glutathione PeroXidase
C11E4.6	WBGene00007520	C11E4.6	none available	not known
C11E4.7	WBGene00007521	C11E4.7	none available	not known
C11G10.1	WBGene00007525	C11G10.1	none available	not known
C11H1.2	WBGene00007528	C11H1.2	none available	not known
C11H1.3	WBGene00007529	C11H1.3	C11H1.3 encodes a ring finger-domain containing protein with Concise description: C11H1.3 encodes a ring finger-domain containing protein with similarity to the mammlian MGRN1 (Mahogunin 1) and RNF157 proteins; by homology with MGRN1, C11H1.3 is predicted to function as a ubiquitin ligase that regulates protein catabolism via the proteasome; in C. elegans, C11H1.3 activity is required for normal …	not known
C11H1.8	WBGene00007532	C11H1.8	none available	not known
C11H1.9	WBGene00023500	C11H1.9	none available	not known
C12D12.2	WBGene00001620	glt-1	glt-1 encodes a predicted plasma membrane glutamate transporter Concise description: glt-1 encodes a predicted plasma membrane glutamate transporter that is functional when expressed in Xenopus oocytes; expressed in the M3 pharyngeal neuron, the male tail, some anterior hypodermal cells, and in cells in the terminal	GLutamate Transporter family
C12D12.3	WBGene00015714	C12D12.3	none available	not known
C12D5.10	WBGene00015711	C12D5.10	none available	not known
C12D5.11	WBGene00015712	sre-11	none available	Serpentine Receptor, class E (epsilon)
C12D5.2	WBGene00015705	nhr-152	none available	Nuclear Hormone Receptor family
C12D5.3	WBGene00015706	C12D5.3	none available	not known
C12D5.4	WBGene00015707	C12D5.4	none available	not known
C12D5.5	WBGene00015708	C12D5.5	none available	not known
C12D5.9	WBGene00015710	C12D5.9	none available	not known
C12D8.11	WBGene00004405	rop-1	rop-1 encodes an RNAi-binding protein that is orthologous to Concise description: rop-1 encodes an RNAi-binding protein that is orthologous to the vertebrate 60-kDa Ro autoantigen that is the protein component of the Ro ribonucleoprotein (RNP) complex; ROP-1 binds the single C. elegans Ro RNP RNA component, YRN-1 (Y RNA) in vivo and although loss of rop-1 activity via mutation results in no obvio…	RO (Ro) ribonucleoProtein family
C12D8.12	WBGene00006226	str-182	none available	Seven TM Receptor
C12D8.14	WBGene00007541	fipr-4	none available	FIP (Fungus-Induced Protein) Related
C12D8.15	WBGene00007542	C12D8.15	none available	not known
C12D8.16	WBGene00007543	fipr-7	none available	FIP (Fungus-Induced Protein) Related
C12D8.18	WBGene00044174	fipr-5	none available	FIP (Fungus-Induced Protein) Related
C12D8.19	WBGene00044175	fipr-9	none available	FIP (Fungus-Induced Protein) Related
C12D8.5	WBGene00007536	daf-36	daf-36 encodes a protein homologous to the catalytic subunit Concise description: daf-36 encodes a protein homologous to the catalytic subunit of Rieske-like oxygenases; DAF-36 functions in a hormone biosynthetic pathway producing a ligand for the DAF-12 nuclear receptor that regulates the developmental decision between reproductive growth and dauer formation; a daf-36::gfp reporter fusion is exp…	abnormal DAuer Formation
C12D8.6	WBGene00007537	fipr-8	none available	FIP (Fungus-Induced Protein) Related
C12D8.9	WBGene00007538	C12D8.9	none available	not known
C13A10.1	WBGene00015728	C13A10.1	none available	not known
C13A10.2	WBGene00015729	C13A10.2	none available	not known
C13A2.1	WBGene00015718	C13A2.1	none available	not known
C13A2.12	WBGene00044547	C13A2.12	none available	not known
C13A2.4	WBGene00015721	C13A2.4	none available	not known
C13A2.6	WBGene00015723	C13A2.6	none available	not known
C13A2.9	WBGene00015725	C13A2.9	none available	not known
C13B9.2	WBGene00015733	C13B9.2	none available	not known
C13C12.2	WBGene00007552	C13C12.2	none available	not known
C13C4.6	WBGene00007550	C13C4.6	none available	not known
C13D9.1	WBGene00005657	srr-6	none available	Serpentine Receptor, class R
C13D9.7	WBGene00003573	ncx-8	ncx-8 encodes a putative Na[+]/Ca[2+] exchanger of uncertain Concise description: ncx-8 encodes a putative Na[+]/Ca[2+] exchanger of uncertain stoichiometry and affinity, orthologous to human SLC24A6 and paralogous to NCX-6/-7 and NCX-9/-10; NCX-8 may function intracellularly; NCX-8 has tandem Calx-alpha domains predicted to carry out ion transport; NCX-8 is required for normally high	Na/Ca eXchangers
C13D9.8	WBGene00003574	ncx-9	ncx-9 encodes a putative Na[+]/Ca[2+] exchanger of uncertain Concise description: ncx-9 encodes a putative Na[+]/Ca[2+] exchanger of uncertain stoichiometry and affinity, orthologous to human SLC24A6 and paralogous to NCX-6/-8 and NCX-10; NCX-9 may function intracellularly; NCX-9 has tandem Calx-alpha domains predicted to carry out ion transport; NCX-9 has no obvious function in mass RNAi	Na/Ca eXchangers
C13F10.2	WBGene00015742	kxd-1	none available	KXDl (KxDL) motif containing homolog
C13F10.6	WBGene00015745	C13F10.6	none available	not known
C13F10.7	WBGene00015746	C13F10.7	none available	not known
C13G3.1	WBGene00007553	C13G3.1	none available	not known
C13G5.1	WBGene00000439	ceh-16	ceh-16 encodes a homeodomain protein orthologous to Drosophila Concise description: ceh-16 encodes a homeodomain protein orthologous to Drosophila and vertebrate Engrailed proteins involved in segment and appendage development; ceh-16 is an essential gene required for proper specification and differentiation of the lateral seam cells during embryonic development; in specifying seam cell fates, CE…	C. Elegans Homeobox
C14A11.1	WBGene00006632	tsp-6	none available	TetraSPanin family
C14A11.5	WBGene00015750	C14A11.5	none available	not known
C14A4.11	WBGene00007561	ccm-3	ccm-3 encodes a protein with similarity to vertebrate programmed Concise description: ccm-3 encodes a protein with similarity to vertebrate programmed cell death protein 10, also known as TFAR15 or CCM3, which is associated with cerebral cavernous malformations type 3 (OMIM:603285); in C. elegans, deletion mutations in ccm-3 are associated with sterility and lethality and large-scale RNAi experim…	CCM (Cerebral Cavernous Malformation) gene homolog
C14A4.9	WBGene00007560	C14A4.9	none available	not known
C14A6.1	WBGene00007565	clec-48	none available	C-type LECtin
C14A6.13	WBGene00050956	C14A6.13	none available	not known
C14A6.6	WBGene00007570	C14A6.6	none available	not known
C14B1.10	WBGene00007581	alkb-8	none available	ALKylated DNA repair protein AlkB homolog
C14B1.4	WBGene00006474	wdr-5.1	wdr-5.1 encodes a WD40 repeat-containing protein that is the Concise description: wdr-5.1 encodes a WD40 repeat-containing protein that is the C. elegans ortholog of mammalian WDR5, a member of a conserved H3K4 trimethylation (H3K4me3) complex; WDR-5.1 functions to regulate H3K4 methylation levels and to negatively regulate adult worm lifespan; WDR-5.1 activity also antagonizes SynMuv transcripti…	WD Repeat protein
C14B1.8	WBGene00007579	C14B1.8	C14B1.8 encodes a coiled-coil protein.	not known
C14B4.2	WBGene00007583	C14B4.2	none available	not known
C14B9.4	WBGene00004042	plk-1	plk-1 encodes a serine/threonine polo-like kinase homologous Concise description: plk-1 encodes a serine/threonine polo-like kinase homologous to Drosophila polo and Saccharomyces cerevisiae CDC5; during development, plk-1 functions to regulate meiotic cell cycle progression as well as embryonic cytoplasmic polarity in newly fertilized embryos and possibly germline development; specifically, plk-…	POLO Kinase
C14C10.1	WBGene00007584	C14C10.1	none available	not known
C14C10.2	WBGene00007585	C14C10.2	none available	not known
C14C10.7	WBGene00007590	ttr-43	none available	TransThyretin-Related family domain
C14C11.1	WBGene00015765	C14C11.1	none available	not known
C14C11.8	WBGene00004104	pqn-13	The protein product of this gene is predicted to contain a Concise description: The protein product of this gene is predicted to contain a glutamine/asparagine (Q/N)-rich ('prion') domain, by the algorithm of Michelitsch	Prion-like-(Q/N-rich)-domain-bearing protein
C14C6.2	WBGene00015756	C14C6.2	none available	not known
C14C6.5	WBGene00015759	C14C6.5	C14C6.5 encodes a protein that contains a Metridin-like ShK Concise description: C14C6.5 encodes a protein that contains a Metridin-like ShK toxin domain; C14C6.5 is involved in the transcriptional, innate immune response	not known
C14E2.7	WBGene00044562	C14E2.7	none available	not known
C14F11.1	WBGene00015778	got-2.2	none available	Glutamate Oxaloacetate Transaminase
C14F11.3	WBGene00001803	lite-1	lite-1 encodes a eight-transmembrane protein that is a member Concise description: lite-1 encodes a eight-transmembrane protein that is a member of the invertebrate family of Gustatory receptors; LITE-1 functions in neurons as an ultraviolet light receptor required for proper avoidance (photophobic) response to short-wavelength light; ectopic expression of LITE-1 in other tissues, namely body wal…	high-energy LIghT unrEsponsive
C14F11.4	WBGene00015780	C14F11.4	none available	not known
C14F11.5	WBGene00002024	hsp-43	hsp-43 encodes a member of the hsp20 family.	Heat Shock Protein
C14F11.6	WBGene00015781	C14F11.6	none available	not known
C14F11.7	WBGene00015782	C14F11.7	none available	not known
C14F5.2	WBGene00006980	zig-3	zig-3 encodes a predicted secreted protein that is a member Concise description: zig-3 encodes a predicted secreted protein that is a member of the immunoglobulin superfamily of proteins; a zig-3::gfp reporter fusion is expressed in the PVT, AIM, and ASI neurons, as well as in the vulva and weakly in the body	2 (Zwei) IG domain protein
C14F5.5	WBGene00004774	sem-5	sem-5 encodes a Src homology (SH) domain 2 and 3-containing Concise description: sem-5 encodes a Src homology (SH) domain 2 and 3-containing protein, orthologous to human GRB2 (OMIM:108355) and Drosophila Drk; sem-5 functions in multiple signaling pathways during development including those regulating sex myoblast migration, muscle membrane extension, vulval induction, fluid balance, viability, a…	SEx Muscle abnormal
C14H10.2	WBGene00007592	C14H10.2	none available	not known
C15A11.1	WBGene00000612	col-35	col-35 encodes a collagen that is individually dispensable Concise description: col-35 encodes a collagen that is individually dispensable for viability and gross morphology in mass RNAi screens; the amino- and carboxyl-terminal cysteine-rich regions of COL-35 are most closely related to those of COL-8, COL-19,	COLlagen
C15A11.4	WBGene00007598	C15A11.4	none available	not known
C15A11.7	WBGene00007599	C15A11.7	none available	not known
C15A7.2	WBGene00007595	C15A7.2	none available	not known
C15B12.4	WBGene00015786	C15B12.4	none available	not known
C15B12.8	WBGene00015788	C15B12.8	none available	not known
C15B12.9	WBGene00044573	C15B12.9	none available	not known
C15C6.1	WBGene00007600	C15C6.1	none available	not known
C15C6.2	WBGene00007601	C15C6.2	none available	not known
C15C6.3	WBGene00007602	C15C6.3	none available	not known
C15C6.4	WBGene00007603	C15C6.4	C15C6.4 encodes an ortholog of Pop4 (Rpp29), a protein subunit Concise description: C15C6.4 encodes an ortholog of Pop4 (Rpp29), a protein subunit of the endoribonuclease RNAse P, which cleaves tRNA precursors to produce their	not known
C15C7.1	WBGene00015789	syx-6	none available	SYntaXin
C15C7.4	WBGene00015790	C15C7.4	none available	not known
C15C8.1	WBGene00007604	xbx-9	none available	X-BoX promoter element regulated
C15C8.2	WBGene00000521	cky-1	cky-1 encodes a member of the basic helix-loop-helix/Per-Arnt-Sim Concise description: cky-1 encodes a member of the basic helix-loop-helix/Per-Arnt-Sim (bHLH-PAS) protein family; CKY-1 physically interacts with AHA-1, and when co-expressed in vitro, an AHA-1/CKY-1 complex exhibits sequence-specific DNA binding; when co-expressed in cultured cells, the AHA-1/CKY-1 complex can stimulate reporter g…	CKY homolog
C15C8.3	WBGene00007605	hrg-7	none available	Heme Responsive Gene
C15C8.8	WBGene00045460	C15C8.8	none available	not known
C15F1.2	WBGene00015795	C15F1.2	none available	not known
C15F1.8	WBGene00015797	C15F1.8	none available	not known
C15F1.9	WBGene00006344	sup-39	none available	SUPpressor
C15H11.1	WBGene00007613	C15H11.1	none available	not known
C15H11.8	WBGene00007616	rpoa-12	none available	RNA POlymerase I (A) subunit
C15H9.1	WBGene00003778	nnt-1	nnt-1 encodes a proton-pumping nicotinamide nucleotide transhydrogenase Concise description: nnt-1 encodes a proton-pumping nicotinamide nucleotide transhydrogenase	Nicotinamide Nucleotide Transhydrogenase
C15H9.11	WBGene00015805	C15H9.11	none available	not known
C15H9.6	WBGene00002007	hsp-3	hsp-3 encodes one of two C. elegans heat shock response 70 Concise description: hsp-3 encodes one of two C. elegans heat shock response 70 (hsp70) proteins homologous to mammalian grp78/BiP (glucose regulated protein 78/immunoglobulin heavy chain-binding protein, OMIM:138120); HSP-3 likely functions as a molecular chaperone, and is expressed constitutively (expression is not heat inducible) throu…	Heat Shock Protein
C16A11.1	WBGene00001673	gpa-11	gpa-11 encodes a member of the G protein alpha subunit family Concise description: gpa-11 encodes a member of the G protein alpha subunit family	G Protein, Alpha subunit
C16A11.3	WBGene00015816	C16A11.3	none available	not known
C16A3.11	WBGene00023469	C16A3.11	none available	not known
C16B8.2	WBGene00015822	C16B8.2	none available	not known
C16C10.4	WBGene00007625	C16C10.4	none available	not known
C16C10.5	WBGene00007626	rnf-121	rnf-121 encodes a RING finger E3 ubiquitin ligase; RNF-121 Concise description: rnf-121 encodes a RING finger E3 ubiquitin ligase; RNF-121 appears to function in the endoplasmic reticulum-associated degradation (ERAD) pathway downstream of PEK-1; RNF-121 exhibits E3 ubiquitin-protein ligase activity in vitro and in vivo regulates levels of the PAT-3 beta integrin subunit which is an RNF-121 subst…	RiNg Finger protein
C16C2.1	WBGene00000430	ceh-5	ceh-5 encodes a homeodomain protein, similar to the human VENTRAL Concise description: ceh-5 encodes a homeodomain protein, similar to the human VENTRAL ANTERIOR HOMEO BOX 2 gene (VAX2; OMIM:604295); CEH-5 is dispensable for viability	C. Elegans Homeobox
C16C4.15	WBGene00015839	math-10	none available	MATH (meprin-associated Traf homology) domain containing
C16C4.4	WBGene00015828	math-14	none available	MATH (meprin-associated Traf homology) domain containing
C16C4.6	WBGene00015830	fbxb-98	This gene encodes a protein containing an F-box, a motif predicted Concise description: This gene encodes a protein containing an F-box, a motif predicted to mediate protein-protein interactions either with homologs of yeast Skp-1p or with other proteins; its encoded protein also contains a Pfam-B45 motif of presently	F-box B protein
C16C8.13	WBGene00015851	C16C8.13	none available	not known
C16C8.18	WBGene00015855	C16C8.18	none available	not known
C16C8.19	WBGene00015856	C16C8.19	none available	not known
C16C8.2	WBGene00015841	skpo-2	none available	ShK domain and PerOxidase domain containing protein
C16C8.20	WBGene00195070	C16C8.20	none available	not known
C16C8.4	WBGene00015842	C16C8.4	none available	not known
C16C8.5	WBGene00015843	C16C8.5	none available	not known
C16C8.8	WBGene00015846	C16C8.8	none available	not known
C16C8.9	WBGene00015847	C16C8.9	none available	not known
C16D6.2	WBGene00007635	npr-4	none available	NeuroPeptide Receptor family
C16D9.1	WBGene00015857	C16D9.1	none available	not known
C16E9.1	WBGene00015865	C16E9.1	none available	not known
C16E9.2	WBGene00015866	C16E9.2	none available	not known
C17B7.15	WBGene00268213	C17B7.15	none available	not known
C17B7.4	WBGene00015878	C17B7.4	none available	not known
C17B7.5	WBGene00015879	C17B7.5	none available	not known
C17C3.1	WBGene00015887	C17C3.1	none available	not known
C17C3.10	WBGene00001966	hlh-27	hlh-27 encodes a REF-1-like protein with two bHLH domains, Concise description: hlh-27 encodes a REF-1-like protein with two bHLH domains, that represses lag-2 transcription in ABa descendants (in response to a Notch signal, redundantly with REF-1, HLH-25, HLH-26, HLH-29, and perhaps HLH-28) and tbx-37 transcription in EMS descendants (independently of Notch, redundantly with REF-1, HLH-26, HLH-2…	Helix Loop Helix
C17C3.12	WBGene00015894	acdh-2	acdh-2 encodes a short-chain acyl-CoA dehydrogenase; ACDH-2 Concise description: acdh-2 encodes a short-chain acyl-CoA dehydrogenase; ACDH-2 is predicted to be a mitochondrial enzyme that catalyzes the first step of fatty acid beta-oxidation and thus plays a key role in energy production; steady-state acdh-2 mRNA levels are under the control of the MDT-15 mediator complex subunit; in addition, ge…	Acyl CoA DeHydrogenase
C17C3.15	WBGene00015896	C17C3.15	none available	not known
C17C3.18	WBGene00002096	ins-13	ins-13 encodes an insulin-like peptide of the insulin superfamily Concise description: ins-13 encodes an insulin-like peptide of the insulin superfamily of proteins (OMIM:176730, 147440); INS-13 is one of 38 insulin-like peptides in C. elegans, and the precise role of INS-13 in C. elegans development is not yet	INSulin related
C17C3.7	WBGene00001964	hlh-25	hlh-25 encodes a REF-1-like protein with two bHLH domains that Concise description: hlh-25 encodes a REF-1-like protein with two bHLH domains that partially represses lag-2 transcription in ABa descendants (in response to a Notch signal, redundantly with HLH-27); lag-2 repression by HLH-25 may require UNC-37; HLH-25's paralogs include HLH-26 through HLH-29 and (more distantly) REF-1; hlh-25 is tr…	Helix Loop Helix
C17C3.8	WBGene00001965	hlh-26	hlh-26 encodes a REF-1-like protein with two bHLH domains that Concise description: hlh-26 encodes a REF-1-like protein with two bHLH domains that represses lag-2 transcription in ABa descendants (in response to a Notch signal, redundantly with REF-1, HLH-27, HLH-29, and perhaps HLH-28) and tbx-37 transcription in EMS descendants (independently of Notch, redundantly with REF-1, HLH-27, HLH-29, an…	Helix Loop Helix
C17D12.1	WBGene00007637	dhhc-7	none available	DHHC-types zinc finger protein
C17D12.5	WBGene00007639	C17D12.5	none available	not known
C17D12.6	WBGene00004963	spe-9	spe-9 encodes an EGF repeat-containing protein with a short Concise description: spe-9 encodes an EGF repeat-containing protein with a short intracellular domain; SPE-9 is required autonomously in sperm for fertilization, and by homology, likely mediates an adhesive or signaling event necessary for proper oocyte fertilization; spe-9 mRNA is detected solely in animals that are engaged in spermatog…	defective SPErmatogenesis
C17D12.7	WBGene00007640	C17D12.7	none available	not known
C17E4.1	WBGene00007641	C17E4.1	none available	not known
C17E4.19	WBGene00219310	C17E4.19	none available	not known
C17E4.2	WBGene00007642	C17E4.2	none available	not known
C17E4.20	WBGene00219313	C17E4.20	none available	not known
C17E4.5	WBGene00003904	pabp-2	pabp-2 encodes the C. elegans PABPN1 (polyadenylate-binding Concise description: pabp-2 encodes the C. elegans PABPN1 (polyadenylate-binding protein, nuclear 1) ortholog; by homology, PABP-2 is predicted to function as a poly(A)-binding protein involved in several aspects of pre-mRNA processing; large-scale RNAi screens indicate that pabp-2 activity is essential for embryonic and larval developme…	PolyA Binding Protein (nuclear)
C17E4.6	WBGene00007645	C17E4.6	none available	not known
C17E7.12	WBGene00015905	C17E7.12	none available	not known
C17E7.13	WBGene00015906	C17E7.13	none available	not known
C17E7.4	WBGene00015899	C17E7.4	none available	not known
C17E7.6	WBGene00015901	nhr-158	none available	Nuclear Hormone Receptor family
C17E7.9	WBGene00015903	C17E7.9	none available	not known
C17F3.1	WBGene00015907	C17F3.1	none available	not known
C17F4.5	WBGene00015912	fbxc-50	This gene encodes a protein containing an F-box, a motif predicted Concise description: This gene encodes a protein containing an F-box, a motif predicted to mediate protein-protein interactions either with homologs of yeast Skp-1p or	F-box C protein
C17F4.6	WBGene00001544	gcy-19	gcy-19 encodes a predicted transmembrane guanylyl cyclase; Concise description: gcy-19 encodes a predicted transmembrane guanylyl cyclase; as loss of gcy-19 activity via RNA-mediated interference does not result in any abnormalities, the precise role of GCY-19 in C. elegans development and/or behavior is not yet known; by sequence similarity, however, GCY-19 can be predicted to function	Guanylyl CYclase
C17F4.7	WBGene00015913	C17F4.7	none available	not known
C17F4.8	WBGene00015914	C17F4.8	none available	not known
C17G1.2	WBGene00007649	C17G1.2	none available	not known
C17G1.4	WBGene00007651	nra-3	none available	Nicotinic Receptor Associated
C17G1.6	WBGene00003553	nas-37	nas-37 encodes a Astacin-class metalloprotease required for Concise description: nas-37 encodes a Astacin-class metalloprotease required for full ecdysis that is expressed in hypodermal cells 4 hours before each ecdysis; NAS-37 protein has an N-terminal signal sequence followed by an Astacin protease domain and three protein-binding domains (EGF-like, CUB, and thrombospondin); NAS-37 accumulates …	Nematode AStacin protease
C17G10.3	WBGene00015917	C17G10.3	none available	not known
C17G10.5	WBGene00003097	lys-8	lys-8 encodes a putative lysozyme required for normal longevity, Concise description: lys-8 encodes a putative lysozyme required for normal longevity, probably because it prevents killing of C. elegans by bacteria infecting its gut; LYS-8 is expressed in intestine up to the terminal bulb of the pharynx, as well as in g1 and g2 pharyngeal gland cells; LYS-8 expression is induced by infection with …	LYSozyme
C17G10.7	WBGene00015919	C17G10.7	none available	not known
C17H11.1	WBGene00015921	C17H11.1	none available	not known
C17H11.2	WBGene00015922	C17H11.2	none available	not known
C17H11.5	WBGene00015925	C17H11.5	none available	not known
C17H12.10	WBGene00015935	C17H12.10	none available	not known
C17H12.11	WBGene00015936	C17H12.11	none available	not known
C17H12.12	WBGene00015937	C17H12.12	none available	not known
C17H12.2	WBGene00015928	C17H12.2	none available	not known
C17H12.3	WBGene00015929	C17H12.3	none available	not known
C17H12.37	WBGene00236786	C17H12.37	none available	not known
C17H12.4	WBGene00015930	C17H12.4	none available	not known
C17H12.5	WBGene00015931	C17H12.5	none available	not known
C17H12.8	WBGene00015933	C17H12.8	none available	not known
C18A11.1	WBGene00015947	C18A11.1	none available	not known
C18A11.2	WBGene00015948	C18A11.2	none available	not known
C18A11.5	WBGene00006962	xol-1	xol-1 encodes an acidic protein structurally related to members Concise description: xol-1 encodes an acidic protein structurally related to members of the GHMP(galactokinase, homoserine kinase, mevalonate kinase, and phosphomevalonate kinase) family of small molecule metabolic kinases; during early development, xol-1, the master sex-determination switch gene that is a direct molecular target of …	XO Lethal
C18A3.10	WBGene00015946	C18A3.10	none available	not known
C18A3.5	WBGene00015943	tiar-1	none available	TIA-1/TIAL RNA binding protein homolog
C18A3.8	WBGene00001958	hlh-14	hlh-14 encodes a basic helix-loop-helix (bHLH) transcription Concise description: hlh-14 encodes a basic helix-loop-helix (bHLH) transcription factor that is one of five C. elegans Achaete-Scute family homologs; HLH-14 activity is required generally for normal egg-laying, movement, body morphology, and larval development; more specifically, HLH-14 is required for proper neuronal development, part…	Helix Loop Helix
C18B10.10	WBGene00006285	str-259	none available	Seven TM Receptor
C18B12.3	WBGene00001096	dsc-1	none available	Defecation Suppressor of Clk-1
C18B12.6	WBGene00007668	C18B12.6	none available	not known
C18B2.2	WBGene00015953	C18B2.2	none available	not known
C18C4.9	WBGene00015969	glb-6	glb-6 encodes a novel globin-like protein; GLB-6 is expressed Concise description: glb-6 encodes a novel globin-like protein; GLB-6 is expressed in neurons and glb-6 expression is downregulated in a daf-2(e1370) mutant background under normoxic conditions; biochemical characterization of GLB-6 indicates that CO, NO, and CN- do not bind to the heme in GLB-6 and that GLB-6 demonstrates a low	GLoBin related
C18D1.1	WBGene00000995	die-1	die-1 encodes a C2H2 zinc finger protein containing four fingers, Concise description: die-1 encodes a C2H2 zinc finger protein containing four fingers, homologous to CG18265-PA in Drosophila; DIE-1 is autonomously required in the posterior dorsal hypodermis for intercalation, for morphogenesis in other embryonic tissues,	Dorsal Intercalation and Elongation defect
C18D1.3	WBGene00001447	flp-4	none available	FMRF-Like Peptide
C18D11.4	WBGene00004705	rsp-8	rsp-8 encodes the C. elegans ortholog of the conserved Tra2beta Concise description: rsp-8 encodes the C. elegans ortholog of the conserved Tra2beta	SR Protein (splicing factor)
C18D11.6	WBGene00007682	C18D11.6	none available	not known
C18D4.2	WBGene00007672	fbxa-136	none available	F-box A protein
C18D4.6	WBGene00007675	C18D4.6	none available	not known
C18D4.8	WBGene00007677	C18D4.8	none available	not known
C18E3.2	WBGene00015971	swsn-2.2	swsn-2.2 encodes a homolog of Swp73/BAF60, a component of the Concise description: swsn-2.2 encodes a homolog of Swp73/BAF60, a component of the SWI/SNF complex that is conserved from yeast to mammals and that is involved in chromatin remodeling; swsn-2.2 is probably required during mitosis of the T cells	SWI/SNF nucleosome remodeling complex component
C18E3.3	WBGene00015972	C18E3.3	none available	not known
C18E3.8	WBGene00001985	hop-1	hop-1 encodes one of three C. elegans presenilins (the other Concise description: hop-1 encodes one of three C. elegans presenilins (the other two presenilins are encoded by sel-12 and spe-4); originally identified on the basis of its sequence similarity to SEL-12 and the human PS1 and PS2 presenilins, HOP-1 has been shown to function redundantly with SEL-12 in embryonic, larval, and germline dev…	Homolog Of Presenilin
C18E3.9	WBGene00015976	C18E3.9	none available	not known
C18E9.11	WBGene00003870	ooc-5	ooc-5 encodes a AAA+ ATPase that is related to the Torsin family Concise description: ooc-5 encodes a AAA+ ATPase that is related to the Torsin family of proteins; along with TOR-1 and TOR-2, OOC-5 comprises the three C. elegans orthologs of human Torsin 1A; during embryonic development, OOC-5 activity is essential and required for re-establishment of PAR protein asymmetry in the P1 cell of the t…	abnormal OOCyte formation
C18E9.6	WBGene00007686	tomm-40	none available	Translocase of Outer Mitochondrial Membrane
C18E9.7	WBGene00007687	C18E9.7	none available	not known
C18E9.8	WBGene00007688	C18E9.8	C18E9.8 is orthologous to the human gene JOINED TO JAZF1 (JJAZ1; Concise description: C18E9.8 is orthologous to the human gene JOINED TO JAZF1 (JJAZ1;	not known
C18F10.2	WBGene00015977	C18F10.2	none available	not known
C18F3.4	WBGene00044508	nsy-7	nsy-7 encodes a protein with distant similarity to homeodomain Concise description: nsy-7 encodes a protein with distant similarity to homeodomain transcription factors; during neuronal development, nsy-7 functions downstream of an initial embryonic signaling pathway involving unc-2, unc-36, and nsy-1, to coordinate the transition from initial establishment to subsequent stable specification (mai…	Neuronal SYmmetry
C18G1.5	WBGene00001855	hil-4	none available	HIstone H1 Like
C18G1.8	WBGene00015986	C18G1.8	none available	not known
C18H7.1	WBGene00015993	C18H7.1	none available	not known
C18H7.11	WBGene00044457	C18H7.11	none available	not known
C18H7.2	WBGene00002140	inx-18	inx-18 encodes a predicted member of the innexin family.	INneXin
C18H7.3	WBGene00000676	col-102	col-102 encodes a cuticle collagen.	COLlagen
C18H7.4	WBGene00015994	C18H7.4	none available	not known
C18H7.6	WBGene00015996	C18H7.6	none available	not known
C18H7.7	WBGene00015997	C18H7.7	none available	not known
C18H9.12	WBGene00219826	C18H9.12	none available	not known
C18H9.5	WBGene00016003	C18H9.5	none available	not known
C23F12.3	WBGene00016008	C23F12.3	none available	not known
C23G10.1	WBGene00016010	C23G10.1	none available	not known
C23G10.11	WBGene00016017	C23G10.11	none available	not known
C23G10.14	WBGene00271647	C23G10.14	none available	not known
C23G10.5	WBGene00016012	C23G10.5	none available	not known
C23G10.6	WBGene00016013	C23G10.6	none available	not known
C23G10.8	WBGene00016015	C23G10.8	none available	not known
C23H3.1	WBGene00001193	egl-26	egl-26 encodes a protein that contains an H-box and an NC domain Concise description: egl-26 encodes a protein that contains an H-box and an NC domain that is a member of the LRAT (lecithin retinol acyltransferase) subfamily of the NlpC/P60 superfamily of enzymes; egl-26 activity is required for fertility, egg laying, and vulval development, specifically the connection of the uterus to the vulva …	EGg Laying defective
C23H4.1	WBGene00000277	cab-1	Novel protein which has a C-terminal motif weakly homologous Concise description: Novel protein which has a C-terminal motif weakly homologous to mouse NPDC-1 and is involved in synaptic regulation; it is expressed in various neurons including ventral cord and tail ganglion neurons; it physically interacts	C-terminus-of-AEX-Binding protein
C23H4.3	WBGene00007692	C23H4.3	none available	not known
C23H4.4	WBGene00007693	C23H4.4	none available	not known
C23H5.15	WBGene00219423	C23H5.15	none available	not known
C23H5.2	WBGene00016024	glb-7	glb-7 encodes a globin with no obvious function in mass RNAi Concise description: glb-7 encodes a globin with no obvious function in mass RNAi	GLoBin related
C23H5.9	WBGene00001729	grl-20	grl-20 encodes a hedgehog-like protein, with an N-terminal Concise description: grl-20 encodes a hedgehog-like protein, with an N-terminal signal sequence, a central low-complexity region, and a C-terminal Ground-like (Grl) domain; the Grl domain is predicted to form a cysteine-crosslinked protein involved in intercellular signalling, and it has subtle similarity to the N-terminal Hedge	GRound-Like (grd related)
C24A1.1	WBGene00016028	flp-24	none available	FMRF-Like Peptide
C24A1.2	WBGene00016029	elf-1	none available	ETS-Like transcription Factor homolog
C24A11.1	WBGene00016040	C24A11.1	none available	not known
C24A3.6	WBGene00006672	twk-18	twk-18 encodes one of 44 C. elegans TWK (two-P domain K+) potassium Concise description: twk-18 encodes one of 44 C. elegans TWK (two-P domain K+) potassium channel subunits that contain two pore-forming domains and four transmembrane domains; TWK-18 was originally defined by gain-of-function mutations that result in embryonic lethality at the two-fold stage, locomotion defects, longer than norma…	TWiK family of potassium channels
C24A8.1	WBGene00016037	dop-6	dop-6 encodes an homolog of mammalian D2 or D3 dopamine receptors, Concise description: dop-6 encodes an homolog of mammalian D2 or D3 dopamine receptors, and a paralog of DOP-2/-3; dop-6 is expressed in the nervous system; because of its paralogy, DOP-6 might act redundantly with DOP-2 to promote the basal slowing response to bacterial feeding, or it might account for the residual response to ex…	DOPamine receptor
C24B5.3	WBGene00004216	ptr-1	ptr-1 encodes an ortholog of Drosophila and human PTCHD3, which Concise description: ptr-1 encodes an ortholog of Drosophila and human PTCHD3, which defines one of seven paralogous families of sterol sensing domain (SSD) proteins; individually, PTR-1 is weakly required for normal molting from L4 to adult stages; however, PTR-1, in conjunction with either PTR-16 alone or with PTR-6 and PTR-10, is …	PaTched Related family
C24B9.3	WBGene00016048	C24B9.3	none available	not known
C24B9.9	WBGene00016052	dod-3	none available	Downstream Of DAF-16 (regulated by DAF-16)
C24D10.1	WBGene00016053	C24D10.1	none available	not known
C24D10.5	WBGene00016056	C24D10.5	none available	not known
C24D10.7	WBGene00016058	nspd-3	none available	Nematode Specific Peptide family, group D
C24D10.8	WBGene00043147	nspd-6	none available	Nematode Specific Peptide family, group D
C24F3.3	WBGene00003531	nas-12	nas-12 encodes an astacin-like metalloprotease; large-scale Concise description: nas-12 encodes an astacin-like metalloprotease; large-scale expression studies reveal that a nas-12::GFP promoter fusion is expressed in the	Nematode AStacin protease
C24F3.6	WBGene00000698	col-124	none available	COLlagen
C24G6.1	WBGene00006376	syp-2	syp-2 encodes a coiled-coil protein; during meiosis, syp-2 Concise description: syp-2 encodes a coiled-coil protein; during meiosis, syp-2 activity is required for the normal progression of chromosome organization in the nucleus, for maintaining stable pairing between homologous chromosomes subsequent to initial pairing, and for productive crossover events and chiasmata formation; SYP-2 localizes…	SYnaPsis in meiosis abnormal
C24G6.6	WBGene00016061	hpo-15	none available	Hypersensitive to POre-forming toxin
C24G6.7	WBGene00001710	grl-1	grl-1 encodes a hedgehog-like protein, with an N-terminal signal Concise description: grl-1 encodes a hedgehog-like protein, with an N-terminal signal sequence, a central proline-rich region, and a C-terminal Ground-like (Grl) domain; GRL-1 is expressed in intestine, neurons, and larval arcade cells; the Grl domain is predicted to form a cysteine-crosslinked protein involved in intercellular sign…	GRound-Like (grd related)
C24H10.1	WBGene00016067	C24H10.1	C24H10.1 encodes a claudin homolog that may be required for Concise description: C24H10.1 encodes a claudin homolog that may be required for normal cohesion of apical junctions in epithelia; C24H10.1 is worm-specific, with obvious homologs only in C. elegans; C24H10.1 has no obvious function in mass RNAi assays; claudins are integral membrane proteins with four transmembrane sequences that are fo…	not known
C24H10.3	WBGene00016069	C24H10.3	none available	not known
C24H11.3	WBGene00006557	tbx-38	tbx-38 encodes a T box transcription factor; during embryonic Concise description: tbx-38 encodes a T box transcription factor; during embryonic development, tbx-38 functions redundantly with tbx-37 to effect Notch-mediated pharyngeal mesoderm induction in descendants of the ABa blastomere; in addition, tbx-38 and tbx-37 are required for proper cell fate specification of other ABa descendants, su…	T BoX family
C24H11.5	WBGene00007702	C24H11.5	none available	not known
C24H11.9	WBGene00007704	mdt-21	none available	MeDiaTor
C24H12.1	WBGene00016071	C24H12.1	This gene encodes a protein containing an F-box, a motif predicted Concise description: This gene encodes a protein containing an F-box, a motif predicted to mediate protein-protein interactions either with homologs of yeast Skp-1p or with other proteins; its encoded protein also contains a Pfam-B45 motif of presently	not known
C24H12.11	WBGene00016080	C24H12.11	none available	not known
C24H12.2	WBGene00016072	C24H12.2	none available	not known
C24H12.3	WBGene00023244	C24H12.3	none available	not known
C24H12.5	WBGene00016074	dnsn-1	none available	Downstream Neighbor of SoN homolog
C24H12.7	WBGene00016076	C24H12.7	none available	not known
C25A1.1	WBGene00007705	C25A1.1	none available	not known
C25A1.2	WBGene00001442	fkh-10	fkh-10 encodes one of 15 forkhead transcriptional regulators Concise description: fkh-10 encodes one of 15 forkhead transcriptional regulators encoded by the C. elegans genome; by homology, FKH-10 is predicted to function as a transcription factor that regulates gene expression during development; however, as loss of fkh-10 activity via RNA-mediated interference (RNAi) does not result in any obvi…	ForKHead transcription factor family
C25A1.20	WBGene00303030	C25A1.20	none available	not known
C25A1.4	WBGene00045383	sup-46	sup-46, when mutated, suppresses the lethality of gna-2(qa705); Concise description: sup-46, when mutated, suppresses the lethality of gna-2(qa705); however, the three suppressor alleles (qa707, qa708, qa709) require a gna-1(+) background for suppression, suggesting that uridine diphosphate-N-acetylglucosamine (UDP-GlcNAc) synthesis is indispensable for embryonic development, and that SUP-46	SUPpressor
C25A1.8	WBGene00007709	clec-87	clec-87 encodes a C-type lectin, paralogous to CLEC-88, C25B8.4, Concise description: clec-87 encodes a C-type lectin, paralogous to CLEC-88, C25B8.4, F26D10.12, and ZK858.3; CLEC-87 has a single chondroitin attachment site verified by mass spectrometry; clec-87 expression is upregulated in response to pathogen	C-type LECtin
C25A1.9	WBGene00007710	rsa-1	rsa-1 encodes a protein phosphatase 2A (PP2A) regulatory subunit Concise description: rsa-1 encodes a protein phosphatase 2A (PP2A) regulatory subunit of the B'' class; RSA-1 is required for localization of C. elegans PP2A to centrosomes and for mitotic spindle assembly; RSA-1 physically interacts with the LET-92 PP2A catalytic subunit and the PAA-1 PP2A structural subunit; centrosomal levels of …	Regulator of Spindle Assembly
C25A11.1	WBGene00016086	C25A11.1	none available	not known
C25A11.2	WBGene00016087	C25A11.2	none available	not known
C25A8.4	WBGene00016084	cht-3	none available	CHiTinase
C25B8.1	WBGene00002233	kqt-1	kqt-1 encodes one of three C. elegans KCNQ-like potassium channel Concise description: kqt-1 encodes one of three C. elegans KCNQ-like potassium channel subunits that, with respect to humans, is most similar to the KCNQ2-5 subfamily of channel proteins; although loss of KQT-1 activity via large-scale RNAi screens results in no obvious abnormalities, KQT-1 likely functions to regulate cellular exc…	potassium channel, KvQLT family
C25B8.4	WBGene00016088	clec-266	none available	C-type LECtin
C25B8.7	WBGene00016090	aexr-2	none available	AEX-2 related neuropeptide Receptor
C25B8.8	WBGene00044297	C25B8.8	none available	not known
C25D7.1	WBGene00007714	C25D7.1	none available	not known
C25D7.15	WBGene00007722	C25D7.15	none available	not known
C25D7.4	WBGene00007716	fbxa-82	This gene encodes a protein containing an F-box, a motif predicted Concise description: This gene encodes a protein containing an F-box, a motif predicted to mediate protein-protein interactions either with homologs of yeast Skp-1p or with other proteins; this gene's encoded protein also contains an FTH/DUF38 motif,	F-box A protein
C25D7.6	WBGene00003155	mcm-3	mcm-3 encodes a member of the MCM2/3/5 family with similarity Concise description: mcm-3 encodes a member of the MCM2/3/5 family with similarity	yeast MCM (licensing factor) related
C25E10.1	WBGene00016091	nhr-30	none available	Nuclear Hormone Receptor family
C25E10.10	WBGene00016099	C25E10.10	C25E10.10 encodes a putative secreted TIL-domain protease inhibitor Concise description: C25E10.10 encodes a putative secreted TIL-domain protease inhibitor paralogous to SWM-1, ISL-1, and the products of 11 other C. elegans genes; C25E10.10 and its relatives are collectively similar to other TIL-domain protease inhibitors from nematodes, insects, and vertebrates; C25E10.10 has no obvious functio…	not known
C25E10.13	WBGene00023431	C25E10.13	none available	not known
C25E10.16	WBGene00202512	C25E10.16	none available	not known
C25E10.2	WBGene00016092	cyp-33B1	none available	CYtochrome P450 family
C25E10.3	WBGene00016093	srsx-34	none available	Serpentine Receptor, class SX
C25E10.4	WBGene00016094	C25E10.4	none available	not known
C25E10.8	WBGene00016097	C25E10.8	C25E10.8 encodes a putative secreted TIL-domain protease inhibitor Concise description: C25E10.8 encodes a putative secreted TIL-domain protease inhibitor paralogous to SWM-1, ISL-1, and the products of 11 other C. elegans genes; C25E10.8 and its relatives are collectively similar to other TIL-domain protease inhibitors from nematodes, insects, and vertebrates; despite both swm-1 and C25E10.8 bei…	not known
C25E10.9	WBGene00023417	swm-1	swm-1 encodes a putative secreted TIL-domain protease inhibitor Concise description: swm-1 encodes a putative secreted TIL-domain protease inhibitor that, in males, inhibits unpolarized round spermatids from remodelling themselves into motile spermatozoa until their transfer to a hermaphrodite; SWM-1 is also required for efficient sperm transfer, and thus for male fertility; SWM-1 is biologically…	Sperm activation Without Mating
C25F6.2	WBGene00001006	dlg-1	dlg-1 encodes a MAGUK protein, orthologous to Drosophila Discs Concise description: dlg-1 encodes a MAGUK protein, orthologous to Drosophila Discs large; DLG-1 is physically located at apical adherens junctions in all epithelia and is required for organization of the embryonic gut epithelium into a coherent	Drosophila Discs LarGe homolog
C25F6.4	WBGene00016104	ddr-1	The C25F6.4 gene encodes a protein tyrosine kinase homolog Concise description: The C25F6.4 gene encodes a protein tyrosine kinase homolog	Discoidin Domain Receptor
C25F6.7	WBGene00016106	C25F6.7	none available	not known
C25F9.11	WBGene00045411	C25F9.11	none available	not known
C25F9.4	WBGene00007724	C25F9.4	none available	not known
C25F9.7	WBGene00005833	srw-86	none available	Serpentine Receptor, class W
C25G4.2	WBGene00007730	C25G4.2	none available	not known
C25G4.6	WBGene00007733	smz-1	smz-1 encodes a PDZ domain-containing protein; SMZ-1 activity Concise description: smz-1 encodes a PDZ domain-containing protein; SMZ-1 activity is required for spermatocytes to progress through meiotic divisions, and specifically for meiotic chromosome segregation; SMZ-1 localizes to spermatogenic meiotic chromosomes	Sperm Meiosis PDZ domain containing proteins
C25G6.1	WBGene00016107	C25G6.1	none available	not known
C25G6.4	WBGene00016109	C25G6.4	none available	not known
C25H3.10	WBGene00016119	C25H3.10	none available	not known
C25H3.15	WBGene00044391	C25H3.15	none available	not known
C25H3.5	WBGene00016114	flp-27	none available	FMRF-Like Peptide
C26B2.2	WBGene00016125	C26B2.2	none available	not known
C26B2.8	WBGene00016130	C26B2.8	none available	not known
C26B9.3	WBGene00016133	C26B9.3	none available	not known
C26B9.6	WBGene00016135	C26B9.6	none available	not known
C26B9.7	WBGene00016136	C26B9.7	none available	not known
C26C6.1	WBGene00007042	pbrm-1	pbrm-1 encodes an ortholog of human polybromo 1 (OMIM:606083) Concise description: pbrm-1 encodes an ortholog of human polybromo 1 (OMIM:606083) and Saccharomyces cerevisiae RSC1 and RSC2; by homology, PBRM-1 is predicted to function in chromatin remodeling and transcriptional regulation; pbrm-1 genetically interacts with two or more components of the EGF/RAS signaling pathway, and is required fo…	PolyBRoMo domain containing
C26C6.2	WBGene00001648	goa-1	goa-1 encodes an ortholog of the heterotrimeric G protein alpha Concise description: goa-1 encodes an ortholog of the heterotrimeric G protein alpha subunit Go (Go/Gi class); GOA-1 activity is required for regulation of a number of behaviors, including locomotion, egg-laying, male mating, and olfactory-mediated behaviors; GOA-1 activity is also required for asymmetric cell division in the early e…	G protein,O, Alpha subunit
C26C6.5	WBGene00000938	dcp-66	dcp-66 encodes an ortholog of the NuRD component p66, and is Concise description: dcp-66 encodes an ortholog of the NuRD component p66, and is required for excretory cell differentiation and vulval development; DCP-66 is predicted, by orthology, to be a member of the transcriptionally inhibitory nucleosomal remodelling and deacetylase (NuRD) complex; DCP-66 binds the Ex-1 pgp-12 promoter element …	Deacetylase Complex Protein
C26D10.2	WBGene00001840	hel-1	hel-1 encodes an ortholog of human 56-kD U2AF65 associated Concise description: hel-1 encodes an ortholog of human 56-kD U2AF65 associated protein (UAP56) that is required for exporting mRNAs from the nucleus; unlike animals with RNAi against several other splicing factors, hel-1(RNAi) animals fail to export transgenic GFP mRNA from the nucleus; conversely, hel-1 overexpression is lethal,	HELicase
C26D10.7	WBGene00023420	C26D10.7	C26D10.7 encodes a close paralog of EFF-1 (with 89% identity Concise description: C26D10.7 encodes a close paralog of EFF-1 (with 89% identity at the amino acid level) and a much more distant paralog of AFF-1 (with 27% identity)	not known
C26E1.2	WBGene00007748	C26E1.2	none available	not known
C26E6.3	WBGene00016139	ntl-9	none available	NOT-Like (yeast CCR4/NOT complex component)
C26E6.4	WBGene00016140	rpb-2	none available	RNA Polymerase II (B) subunit
C26E6.5	WBGene00001499	fsn-1	none available	F-box SyNaptic protein
C26E6.9	WBGene00004782	set-2	set-2 encodes a histone H3K4 methyltransferase closely related Concise description: set-2 encodes a histone H3K4 methyltransferase closely related to the yeast Set1 and mammalian SET1/MLL proteins; SET-2 displays H3K4 methyltransferase activity in vitro and in C. elegans, regulates levels of H3K4; SET-2 plays a role in germline development, postembryonic development, negative regulation of lifesp…	SET (trithorax/polycomb) domain containing
C26F1.1	WBGene00016146	C26F1.1	none available	not known
C26F1.10	WBGene00001464	flp-21	flp-21 encodes a single FMRFamide-related neuropeptide (FaRP) Concise description: flp-21 encodes a single FMRFamide-related neuropeptide (FaRP) that serves as a ligand for NPR-1, a G protein-coupled receptor that regulates social versus solitary feeding behavior in several Caenorhabditis species; genetic analysis suggests that FLP-21 acts through NPR-1 to inhibit social feeding behavior; FLP-21 …	FMRF-Like Peptide
C26F1.2	WBGene00016147	cyp-32A1	none available	CYtochrome P450 family
C26F1.5	WBGene00001719	grl-10	grl-10 encodes a hedgehog-like protein, with an N-terminal Concise description: grl-10 encodes a hedgehog-like protein, with an N-terminal signal sequence and a C-terminal Ground-like (Grl) domain; the Grl domain is predicted to form a cysteine-crosslinked protein involved in intercellular signalling, and	GRound-Like (grd related)
C26F1.9	WBGene00004453	rpl-39	rpl-39 encodes a large ribosomal subunit L39 protein.	Ribosomal Protein, Large subunit
C26G2.2	WBGene00007751	C26G2.2	none available	not known
C26H9A.2	WBGene00007752	wdfy-3	none available	WD40 and FYVE domain protein
C27A12.10	WBGene00023409	mbd-2	mbd-2 encodes an truncated ortholog of methyl-CpG-binding-domain Concise description: mbd-2 encodes an truncated ortholog of methyl-CpG-binding-domain (MBD) proteins; this is a surprising orthology, because C. elegans genomic DNA is unmethylated, and may reflect a more general role of MBD proteins in epigenetic regulation independent of methyl-DNA binding; while mbd-2(RNAi) animals have no obviou…	Methyl-CpG BinDing protein
C27A12.2	WBGene00016154	C27A12.2	none available	not known
C27A12.5	WBGene00000429	ceh-2	ceh-2 encodes a homeodomain protein homologous to Drosophila Concise description: ceh-2 encodes a homeodomain protein homologous to Drosophila empty spiracles (EMS) and the vertebrate EMX1 and EMX2 proteins (OMIM:600034, 600035); although the exact biological role of CEH-2 in C. elegans development and/or behavior is not yet known, expression in pharyngeal neurons and muscle, as well as vulval ce…	C. Elegans Homeobox
C27A12.6	WBGene00016156	C27A12.6	none available	not known
C27A12.7	WBGene00016157	C27A12.7	none available	not known
C27A2.12	WBGene00206373	C27A2.12	none available	not known
C27A2.2	WBGene00004434	rpl-22	rpl-22 encodes a large ribosomal subunit L22 protein; by homology, Concise description: rpl-22 encodes a large ribosomal subunit L22 protein; by homology, RPL-22 is predicted to function in protein biosynthesis; in C. elegans, RPL-22 activity is broadly required for embryonic and germline development, as well as normal body	Ribosomal Protein, Large subunit
C27A2.3	WBGene00002068	ify-1	ify-1 encodes a rapidly evolving protein ligand of FZY-1, with Concise description: ify-1 encodes a rapidly evolving protein ligand of FZY-1, with only 53% identity between C. elegans and C. briggsae and with no visible homologs in more distant species; IFY-1 binds FZY-1 and SEP-1 in yeast two-hybrid assays; ify-1(RNAi) and sep-1(RNAi) animals arrest as one-cell embryos with disorganized chromoso…	Interactor of FizzY protein
C27A2.6	WBGene00001102	dsh-2	dsh-2 encodes one of three C. elegans Dishevelled (Dsh) homologs; Concise description: dsh-2 encodes one of three C. elegans Dishevelled (Dsh) homologs; during embryonic development, dsh-2 functions in the Wnt signaling pathway that specifies endoderm and orients the division axis of the EMS blastomere; dsh-2 is also required for many neuronal cell fate specifications and for asymmetric cell divi…	DiSHevelled related
C27A2.8	WBGene00044387	C27A2.8	none available	not known
C27A7.3	WBGene00007755	C27A7.3	none available	not known
C27B7.4	WBGene00007761	rad-26	none available	RADiation sensitivity abnormal/yeast RAD-related
C27B7.5	WBGene00007762	C27B7.5	none available	not known
C27B7.9	WBGene00007765	C27B7.9	none available	not known
C27C12.1	WBGene00007771	C27C12.1	none available	not known
C27C12.3	WBGene00007773	C27C12.3	C27C12.3 encodes a novel protein that is conserved in C. elegans; Concise description: C27C12.3 encodes a novel protein that is conserved in C. elegans; three other genes related to C27C12.3 are present in tandem on the X chromosome; in situ hybridization studies indicate that C27C12.3 mRNA is expressed in the proximal	not known
C27C12.7	WBGene00001055	dpf-2	none available	Dipeptidyl Peptidase Four (IV) family
C27C7.7	WBGene00007769	C27C7.7	none available	not known
C27D6.11	WBGene00044388	C27D6.11	none available	not known
C27D6.12	WBGene00044389	C27D6.12	none available	not known
C27D6.3	WBGene00016161	C27D6.3	none available	not known
C27D8.1	WBGene00007777	C27D8.1	none available	not known
C27F2.1	WBGene00016165	C27F2.1	none available	not known
C27F2.7	WBGene00016169	C27F2.7	This gene encodes a protein containing an F-box, a motif predicted Concise description: This gene encodes a protein containing an F-box, a motif predicted to mediate protein-protein interactions either with homologs of yeast Skp-1p or	not known
C27H5.12	WBGene00271810	C27H5.12	none available	not known
C27H5.2	WBGene00016172	C27H5.2	none available	not known
C27H5.4	WBGene00016174	C27H5.4	none available	not known
C27H5.5	WBGene00000613	col-36	col-36 encodes a collagen protein; expressed during the L1 Concise description: col-36 encodes a collagen protein; expressed during the L1	COLlagen
C27H5.6	WBGene00016175	C27H5.6	none available	not known
C27H5.7	WBGene00001129	dyf-13	dyf-13 encodes a ciliary protein, belonging to a conserved Concise description: dyf-13 encodes a ciliary protein, belonging to a conserved but unfamiliar protein family, that is required for cilial function and formation, undergoes IFT, and might represent a core component of the OSM-3 kinesin IFT pathway; dyf-13 is expressed in AWB neurons; dyf-13 mutations affect morphology of the amphid and ph…	abnormal DYe Filling
C28A5.1	WBGene00007788	C28A5.1	none available	not known
C28A5.2	WBGene00007789	C28A5.2	none available	not known
C28A5.4	WBGene00000463	ceh-43	ceh-43 encodes a homeobox protein of the Distal-less (Dll) Concise description: ceh-43 encodes a homeobox protein of the Distal-less (Dll) class that is required for development of the anterior hypodermis during embryonic morphogenesis for cell adhesion; ceh-43 affects embryonic and larval viability; it is predominantly expressed in the head hypdodermis, neuronal support cells and	C. Elegans Homeobox
C28C12.1	WBGene00016177	C28C12.1	none available	not known
C28C12.11	WBGene00016181	C28C12.11	none available	not known
C28C12.3	WBGene00016179	C28C12.3	none available	not known
C28C12.4	WBGene00016180	C28C12.4	none available	not known
C28C12.5	WBGene00004993	spp-8	none available	SaPosin-like Protein family
C28D4.10	WBGene00007796	C28D4.10	none available	not known
C28D4.3	WBGene00001607	gln-6	none available	GLutamiNe synthetase (glutamate-ammonia ligase)
C28D4.4	WBGene00007792	C28D4.4	none available	not known
C28D4.5	WBGene00007793	C28D4.5	none available	not known
C28D4.7	WBGene00007794	C28D4.7	none available	not known
C28F5.2	WBGene00016184	glb-9	glb-9 encodes a globin with no obvious function in mass RNAi Concise description: glb-9 encodes a globin with no obvious function in mass RNAi	GLoBin related
C28G1.10	WBGene00219376	C28G1.10	none available	not known
C28G1.4	WBGene00016189	C28G1.4	none available	not known
C28G1.5	WBGene00016190	C28G1.5	none available	not known
C28G1.6	WBGene00016191	C28G1.6	none available	not known
C28H8.1	WBGene00016192	bcl-7	bcl-7 encodes the sole C. elegans member of the BCL7 family Concise description: bcl-7 encodes the sole C. elegans member of the BCL7 family of proteins that contains human proteins, namely BCL7A and BCL7B, that are associated with malignant diseases; bcl-7 activity is required for proper terminal seam cell differentiation as well as for normal development of the distal tip cells of the somatic g…	mammalian BCL (B cell lymphoma) gene homologs
C28H8.2	WBGene00016193	C28H8.2	none available	not known
C28H8.5	WBGene00016196	C28H8.5	none available	not known
C28H8.9	WBGene00016200	dpff-1	none available	DPF (transcription factor) Family
C29A12.6	WBGene00007800	C29A12.6	none available	not known
C29E4.1	WBGene00000665	col-90	none available	COLlagen
C29E4.10	WBGene00016207	C29E4.10	C29E4.10 is orthologous to the human gene GALACTOCEREBROSIDASE Concise description: C29E4.10 is orthologous to the human gene GALACTOCEREBROSIDASE	not known
C29E4.14	WBGene00044634	C29E4.14	none available	not known
C29E4.2	WBGene00016202	kle-2	none available	KLEisin (abnormal closure) family
C29E4.7	WBGene00016204	gsto-1	gsto-1 encodes an experimentally verified thiol oxidoreductase Concise description: gsto-1 encodes an experimentally verified thiol oxidoreductase and dehydroascorbate reductase, required for normal stress resistance; formally, GSTO-1 is an omega-class glutathione transferase (GST; EC 2.5.1.18), but it has little activity in vitro on classic GST substrates; GSTO-1 is expressed in postembryonic in…	Glutathione S-Transferase, Omega class
C29E6.1	WBGene00002827	let-653	let-653 encodes a mucin-like protein similar to the highly Concise description: let-653 encodes a mucin-like protein similar to the highly glycosylated mucins secreted by the apical surface of epithelia and believed to provide a protective barrier to exposed cellular surfaces; LET-653 is required for viability, locomotion, and for maintaining the tubular epithelial structure of the	LEThal
C29F3.1	WBGene00001150	ech-1.1	ech-1.1 encodes one of two C. elegans enoyl-CoA hydratases/long-chain Concise description: ech-1.1 encodes one of two C. elegans enoyl-CoA hydratases/long-chain 3-hydroxyacyl-CoA dehydrogenases [EC:4.2.1.17 1.1.1.211] orthologous to human HADHA (hydroxyacyl-coenzyme A dehydrogenase/3-ketoacyl-coenzyme A thiolase/enoyl-coenzyme a hydratase (trifunctional protein), alpha subunit OMIM:600890), which…	Enoyl-CoA Hydratase
C29F3.3	WBGene00007804	C29F3.3	none available	not known
C29F5.1	WBGene00016210	C29F5.1	none available	not known
C29F5.3	WBGene00016212	C29F5.3	C29F5.3 encodes a cytidine deaminase; by homology the product Concise description: C29F5.3 encodes a cytidine deaminase; by homology the product	not known
C29F5.4	WBGene00003403	mps-1	mps-1 encodes single-pass transmembrane proteins that are related Concise description: mps-1 encodes single-pass transmembrane proteins that are related to the vertebrate KCNE proteins, also known as MinK-related peptides (MiRPs) that associate with, and regulate, pore-forming ion channels; mps-1 is required for the normal function of several neurons and thus for normal body touch sensation, chem…	MiRP K channel accessory Subunit
C29F5.7	WBGene00016215	glb-10	glb-10 encodes a globin; glb-10 is expressed in pharynx, intestine, Concise description: glb-10 encodes a globin; glb-10 is expressed in pharynx, intestine, vulval muscle, and many neurons, with at least some subcellular localization to	GLoBin related
C29F5.8	WBGene00044589	C29F5.8	none available	not known
C29F7.10	WBGene00206389	C29F7.10	none available	not known
C29F7.4	WBGene00001435	fkh-3	fkh-3 encodes one of 15 C. elegans forkhead transcription factors; Concise description: fkh-3 encodes one of 15 C. elegans forkhead transcription factors; triply mutant animals with reduced activity of fkh-3, fkh-4, and fkh-5 show reduced expression of 21U-RNA transcripts; in vitro, FKH-3 binds a consensus regulatory element found upstream of 21U-RNAs; an FKH-3 reporter fusion is expressed in mos…	ForKHead transcription factor family
C29F7.5	WBGene00001436	fkh-4	fkh-4 encodes a member of the forkhead domain transcription Concise description: fkh-4 encodes a member of the forkhead domain transcription factor family; triply mutant animals with reduced activity of fkh-3, fkh-4, and	ForKHead transcription factor family
C29F7.6	WBGene00007813	jmjd-3.3	C29F7.6 encodes a putative histone H3 di/trimethyllysine-27 Concise description: C29F7.6 encodes a putative histone H3 di/trimethyllysine-27 (H3K27me2/me3) demethylase; C29F7.6 contains a C-terminal JmjC domain, and is homologous to human JMJD3, UTX (OMIM:300128), and UTY (OMIM:400009); C29F7.6 is expected to antagonize transcriptional repression by polycomb repressor complexes, which mark stem c…	JuMonJi (transcription factor) Domain protein
C29F9.6	WBGene00016221	C29F9.6	none available	not known
C29F9.7	WBGene00003931	pat-4	The pat-4 gene encodes a serine/threonine kinase orthologous Concise description: The pat-4 gene encodes a serine/threonine kinase orthologous to human integrin-linked kinase (ILK, OMIM:602366) and is required for formation of integrin-mediated muscle cell attachments during embryogenesis; PAT-4 probably functions as an adaptor molecule and localizes to dense bodies and M lines; PAT-4 forms a ter…	Paralysed Arrest at Two-fold
C29G2.3	WBGene00016231	C29G2.3	none available	not known
C30A5.10	WBGene00016242	C30A5.10	none available	not known
C30A5.16	WBGene00206533	C30A5.16	none available	not known
C30A5.3	WBGene00016238	mob-4	none available	Mps One Binder (Mats/MOB1) homolog
C30B5.1	WBGene00077732	szy-4	szy-4 was identified in screens for suppressors of the embryonic Concise description: szy-4 was identified in screens for suppressors of the embryonic lethality seen in zyg-1(it25) loss-of-function mutants in which centrosome duplication fails; szy-4 is defined by three mutations that partially suppress the embryonic lethality, of zyg-1(it25) animals; one szy-4 mutation tested, bs17, fully suppre…	Suppressor of ZYg-1
C30B5.17	WBGene00269379	C30B5.17	none available	not known
C30B5.3	WBGene00000771	cpb-2	cpb-2 encodes a cytoplasmic polyadenylation element binding Concise description: cpb-2 encodes a cytoplasmic polyadenylation element binding (CPEB) protein homolog, expressed specifically in the spermatogenic germ line; CPB-2 is dispensable for oogenesis, in contrast to CPEBs in vertebrates (Xenopus), arthropods	CPEB polyA binding family
C30B5.5	WBGene00016246	daf-37	daf-37 encodes a G-protein coupled receptor (GPCR) that belongs Concise description: daf-37 encodes a G-protein coupled receptor (GPCR) that belongs to the serpentine receptor class w (Srw) family of chemoreceptors; daf-37 functions in dauer signaling, upstream of the daf-11/guanylyl cyclase, daf-7/TGF-beta, and daf-2/insulin signaling pathways; daf-37 specifically senses and binds to a ascarosid…	abnormal DAuer Formation
C30B5.6	WBGene00016247	C30B5.6	none available	not known
C30B5.7	WBGene00016248	C30B5.7	none available	not known
C30B5.9	WBGene00194710	mks-2	none available	MecKel-Gruber Syndrome (MKS) homolog
C30E1.5	WBGene00016254	fbxb-114	none available	F-box B protein
C30F12.3	WBGene00016262	C30F12.3	none available	not known
C30F12.7	WBGene00016266	idhg-2	C30F12.7 encodes the C. elegans homolog of the gamma subunit Concise description: C30F12.7 encodes the C. elegans homolog of the gamma subunit of an NAD+-dependent mitochondrial isocitrate dehydrogenase; by homology, the product of C30F12.7 is predicted to catalyze the formation of alpha-ketoglutarate from isocitrate	Isocitrate DeHydrogenase Gamma
C30F2.3	WBGene00007817	C30F2.3	none available	not known
C30F8.4	WBGene00002213	kin-32	kin-32 encodes, by alternative splicing, two isoforms of a Concise description: kin-32 encodes, by alternative splicing, two isoforms of a focal adhesion kinase, orthologous to human PTK2 (OMIM:600758) and PTK2B (OMIM:601212); KIN-32 is expressed in both nuclei and cytoplasms of larval and adult bodywall muscle cells; KIN-32 is also expressed in head neurons, a head mesodermal cell, adult vulval …	protein KINase
C30G12.1	WBGene00016273	C30G12.1	none available	not known
C30G12.10	WBGene00284859	C30G12.10	none available	not known
C30G12.11	WBGene00284861	C30G12.11	none available	not known
C30G12.4	WBGene00016276	C30G12.4	none available	not known
C30G4.3	WBGene00001537	gcy-11	none available	Guanylyl CYclase
C30G4.4	WBGene00016269	C30G4.4	none available	not known
C30G7.1	WBGene00001852	hil-1	none available	HIstone H1 Like
C30G7.3	WBGene00044177	C30G7.3	none available	not known
C30G7.4	WBGene00044178	C30G7.4	none available	not known
C30H6.12	WBGene00044238	C30H6.12	none available	not known
C31B8.4	WBGene00016281	pals-32	none available	Protein containing ALS2cr12 (ALS2CR12) signature
C31B8.8	WBGene00016283	zmp-3	none available	Zinc MetalloProtease
C31C9.5	WBGene00007839	C31C9.5	none available	not known
C31C9.7	WBGene00007841	C31C9.7	none available	not known
C31E10.5	WBGene00007846	C31E10.5	none available	not known
C31E10.6	WBGene00007847	C31E10.6	none available	not known
C31G12.1	WBGene00007850	C31G12.1	none available	not known
C31H1.1	WBGene00016286	C31H1.1	none available	not known
C31H1.5	WBGene00016288	C31H1.5	none available	not known
C31H2.14	WBGene00206484	C31H2.14	none available	not known
C31H2.2	WBGene00001070	dpy-8	dpy-8 encodes a collagen with a nematode-specific N-terminal Concise description: dpy-8 encodes a collagen with a nematode-specific N-terminal domain that is required for normal body morphology and (perhaps) for a normal embryonic	DumPY: shorter than wild-type
C31H2.3	WBGene00016293	C31H2.3	none available	not known
C31H2.4	WBGene00016294	C31H2.4	C31H2.4 encodes a possible 4-hydroxyphenylpyruvate dioxygenase, Concise description: C31H2.4 encodes a possible 4-hydroxyphenylpyruvate dioxygenase, orthologous to human HPDL/GLOXD1, and paralogous to HPD-1 and human HPD (OMIM:609695, mutated in tyrosinemia type III); C31H2.4 has no obvious function in mass RNAi	not known
C32A3.1	WBGene00004765	sel-8	sel-8 encodes a nuclear protein required for GLP-1 and LIN-12 Concise description: sel-8 encodes a nuclear protein required for GLP-1 and LIN-12 signalling, that is analogous to (and may be homologous to) Drosophila MASTERMIND and its mammalian orthologs; SEL-8 (also known as LAG-3) forms a ternary complex with LAG-1/Su(H) and the intracellular domain of either GLP-1 or LIN-12; like MAM, SEL-8 is…	Suppressor/Enhancer of Lin-12
C32A3.2	WBGene00007859	mrps-31	none available	Mitochondrial Ribosomal Protein, Small
C32B5.1	WBGene00016295	fbxc-40	none available	F-box C protein
C32B5.10	WBGene00016303	fbxc-32	none available	F-box C protein
C32B5.11	WBGene00016304	fbxc-41	none available	F-box C protein
C32B5.12	WBGene00016305	fbxc-57	none available	F-box C protein
C32B5.14	WBGene00016307	fbxc-18	none available	F-box C protein
C32B5.15	WBGene00016308	C32B5.15	This gene encodes a protein containing an F-box, a motif predicted Concise description: This gene encodes a protein containing an F-box, a motif predicted to mediate protein-protein interactions either with homologs of yeast Skp-1p or	not known
C32B5.16	WBGene00016309	sdz-4	none available	SKN-1 Dependent Zygotic transcript
C32B5.17	WBGene00044419	fbxc-17	none available	F-box C protein
C32B5.18	WBGene00235351	C32B5.18	none available	not known
C32B5.5	WBGene00016298	fbxc-14	none available	F-box C protein
C32B5.7	WBGene00016300	C32B5.7	none available	not known
C32B5.9	WBGene00016302	fbxc-7	none available	F-box C protein
C32C4.3	WBGene00007863	C32C4.3	none available	not known
C32D5.1	WBGene00016310	C32D5.1	none available	not known
C32D5.12	WBGene00016319	C32D5.12	none available	not known
C32D5.4	WBGene00016312	C32D5.4	none available	not known
C32D5.5	WBGene00016313	set-4	set-4 encodes a putative histone H4 lysine-20 methyltransferase; Concise description: set-4 encodes a putative histone H4 lysine-20 methyltransferase; SET-4 is orthologous to Drosophila SUV4-20, and to human SUV420H1 (OMIM:610881)	SET (trithorax/polycomb) domain containing
C32D5.6	WBGene00016314	C32D5.6	none available	not known
C32E12.1	WBGene00016327	C32E12.1	none available	not known
C32E12.3	WBGene00016329	osr-1	none available	Osmotic Stress Resistant
C32E12.5	WBGene00004771	sem-2	sem-2 encodes an HMG-box transcription factor that affects Concise description: sem-2 encodes an HMG-box transcription factor that affects the migration, division, and cell-fate of the 2 sex myoblasts, and also affects embryonic viability, elongation of embryos, egg laying, anterior body-wall muscle	SEx Muscle abnormal
C32E8.4	WBGene00016322	C32E8.4	none available	not known
C32E8.6	WBGene00016324	C32E8.6	none available	not known
C32E8.8	WBGene00004217	ptr-2	ptr-2 encodes an ortholog of Drosophila and human PTCHD3, which Concise description: ptr-2 encodes an ortholog of Drosophila and human PTCHD3, which defines one of seven paralogous families of sterol sensing domain (SSD) proteins; PTR-2 is required for cytokinesis in somatic cells, but not in the germline (the converse of PTC-1's function); PTR-2 is partially required for normal molting from L4 t…	PaTched Related family
C32F10.2	WBGene00003020	lin-35	lin-35 encodes the C. elegans retinoblastoma protein (Rb) ortholog; Concise description: lin-35 encodes the C. elegans retinoblastoma protein (Rb) ortholog; lin-35 was first identified in screens for synthetic multivulva (synMuv) genes and as a class B synMuv gene, functions redundantly with class A genes to antagonize Ras signaling and negatively regulate vulval development; in addition, loss of…	abnormal cell LINeage
C32F10.4	WBGene00016332	C32F10.4	none available	not known
C32F10.6	WBGene00003601	nhr-2	nhr-2 encodes a member of the nuclear hormone receptor family Concise description: nhr-2 encodes a member of the nuclear hormone receptor family	Nuclear Hormone Receptor family
C32H11.12	WBGene00007875	dod-24	none available	Downstream Of DAF-16 (regulated by DAF-16)
C33A11.1	WBGene00007877	nfki-1	none available	Nuclear Factor of Kappa light polypeptide gene enhancer Gene class description: Nuclear Factor of Kappa light polypeptide gene enhancer
C33A12.12	WBGene00007887	gadr-2	none available	GAstrulation Defective, Redundant
C33A12.15	WBGene00007888	ttr-9	none available	TransThyretin-Related family domain
C33A12.19	WBGene00007890	C33A12.19	none available	not known
C33A12.2	WBGene00007881	nlp-35	none available	Neuropeptide-Like Protein
C33B4.4	WBGene00007892	C33B4.4	none available	not known
C33C12.10	WBGene00016342	C33C12.10	none available	not known
C33C12.3	WBGene00016335	gba-1	none available	beta-GlucocereBrosidAse
C33C12.5	WBGene00016337	fbxb-38	This gene encodes a protein containing an F-box, a motif predicted Concise description: This gene encodes a protein containing an F-box, a motif predicted to mediate protein-protein interactions either with homologs of yeast Skp-1p or with other proteins; its encoded protein also contains a Pfam-B45 motif of presently	F-box B protein
C33C12.8	WBGene00016340	gba-2	none available	beta-GlucocereBrosidAse
C33D12.3	WBGene00006679	twk-26	none available	TWiK family of potassium channels
C33D12.7	WBGene00000451	ceh-30	ceh-30 encodes a homeodomain protein most similar to Drosophila Concise description: ceh-30 encodes a homeodomain protein most similar to Drosophila and mammalian BarH1 (OMIM:605211) which function in neuronal cell fate determination; CEH-30 functions as a key regulator of sex-specific apoptosis; ceh-30 transcription	C. Elegans Homeobox
C33D3.3	WBGene00007894	C33D3.3	none available	not known
C33D9.13	WBGene00194651	C33D9.13	none available	not known
C33D9.3	WBGene00007898	C33D9.3	none available	not known
C33D9.5	WBGene00007899	C33D9.5	none available	not known
C33D9.9	WBGene00007902	C33D9.9	none available	not known
C33E10.1	WBGene00016345	C33E10.1	This gene encodes a protein containing an F-box, a motif predicted Concise description: This gene encodes a protein containing an F-box, a motif predicted to mediate protein-protein interactions either with homologs of yeast Skp-1p or with other proteins; its encoded protein also contains a Pfam-B45 motif of presently	not known
C33E10.2	WBGene00016346	fbxa-120	This gene encodes a protein containing an F-box, a motif predicted Concise description: This gene encodes a protein containing an F-box, a motif predicted to mediate protein-protein interactions either with homologs of yeast Skp-1p or with other proteins; this gene's encoded protein also contains an FTH/DUF38 motif,	F-box A protein
C33E10.3	WBGene00023245	C33E10.3	none available	not known
C33F10.1	WBGene00016351	C33F10.1	none available	not known
C33F10.11	WBGene00016357	C33F10.11	none available	not known
C33F10.12	WBGene00016358	C33F10.12	none available	not known
C33F10.13	WBGene00016359	fbxb-88	none available	F-box B protein
C33F10.7	WBGene00016355	lact-5	lact-5 encodes beta-lactamase domain-containing proteins.	beta-LACTamase domain containing
C33F10.8	WBGene00016356	C33F10.8	This gene encodes a protein containing an F-box, a motif predicted Concise description: This gene encodes a protein containing an F-box, a motif predicted to mediate protein-protein interactions either with homologs of yeast Skp-1p or with other proteins; its encoded protein also contains a Pfam-B45 motif of presently	not known
C33F10.9	WBGene00003435	msp-40	msp-40 encodes a protein that belongs to a family of proteins Concise description: msp-40 encodes a protein that belongs to a family of proteins called the Major Sperm Proteins (MSPs) that is conserved in nematodes; this family consists of closely related, small, basic proteins that make up 15% of sperm protein; this multigene family consists of over fifty genes, including many pseudogenes; MSPs …	Major Sperm Protein
C33G3.4	WBGene00007904	C33G3.4	C33G3.4 is orthologous to the human gene BETA-MANNOSIDASE (MANBA; Concise description: C33G3.4 is orthologous to the human gene BETA-MANNOSIDASE (MANBA;	not known
C33G8.10	WBGene00016367	nhr-162	none available	Nuclear Hormone Receptor family
C33G8.13	WBGene00016369	C33G8.13	none available	not known
C33G8.2	WBGene00016360	C33G8.2	none available	not known
C33G8.4	WBGene00016362	C33G8.4	none available	not known
C33G8.5	WBGene00016363	srab-4	none available	Serpentine Receptor, class AB (class A-like)
C33H5.12	WBGene00004703	rsp-6	rsp-6 encodes an RNA binding protein that is the C. elegans Concise description: rsp-6 encodes an RNA binding protein that is the C. elegans ortholog of the vertebrate SFRS3/SRp20 pre-mRNA splicing factors; although loss of rsp-6 activity alone results in no obvious abnormalities, RNAi experiments targeting multiple RSP proteins indicate that, in combination with other RSP proteins, RSP-6 plays a…	SR Protein (splicing factor)
C33H5.15	WBGene00016381	sgo-1	none available	ShuGOshin (yeast chromosome segregation protein) homolog
C33H5.16	WBGene00016382	C33H5.16	none available	not known
C33H5.2	WBGene00016371	C33H5.2	none available	not known
C34B2.2	WBGene00016387	kbp-5	none available	KNL (kinetochore null) Binding Protein
C34B2.3	WBGene00016388	C34B2.3	none available	not known
C34B7.3	WBGene00007913	cyp-36A1	none available	CYtochrome P450 family
C34B7.4	WBGene00007914	mys-4	C34B7.4 encodes a MYST family histone acetyltransferase; based Concise description: C34B7.4 encodes a MYST family histone acetyltransferase; based upon sequence similarity, the product of C34B7.4 is predicted to be the enzymatic component of an NuA4-like histone acetyltransferase (HAT) complex that functions in transcriptional activation; C34B7.4 is likely required for regulating gene expression …	MYST family histone acetyltransferase-like
C34C12.2	WBGene00007921	C34C12.2	none available	not known
C34C12.3	WBGene00007922	pph-6	pph-6 encodes the sole catalytic subunit of a PP6 protein phosphatase Concise description: pph-6 encodes the sole catalytic subunit of a PP6 protein phosphatase in the nematode genome orthologous to yeast and mammalian PP6 proteins (OMIM:612725); PPH-6 is essential for proper cortical contractility and spindle positioning in one-cell stage embryo; PPH-6 exists in a complex with SAPS-1, they mutua…	Protein PHosphatase
C34C12.6	WBGene00007925	C34C12.6	none available	not known
C34C12.7	WBGene00007926	C34C12.7	none available	not known
C34C12.9	WBGene00007928	C34C12.9	none available	not known
C34C6.10	WBGene00206355	C34C6.10	none available	not known
C34C6.7	WBGene00007919	cup-16	none available	Coelomocyte UPtake-defective
C34D1.1	WBGene00007929	dmd-10	none available	DM (Doublesex/MAB-3) Domain family
C34D1.2	WBGene00007930	dmd-11	none available	DM (Doublesex/MAB-3) Domain family
C34D1.4	WBGene00007931	C34D1.4	none available	not known
C34D10.5	WBGene00303044	C34D10.5	none available	not known
C34D4.1	WBGene00016397	maph-9	none available	Microtubule-Associated Protein Homolog
C34D4.11	WBGene00016403	grsp-3	none available	Glycine Rich Secreted Protein
C34D4.2	WBGene00016398	C34D4.2	none available	not known
C34D4.3	WBGene00016399	C34D4.3	none available	not known
C34D4.4	WBGene00016400	C34D4.4	none available	not known
C34D4.7	WBGene00006114	str-49	none available	Seven TM Receptor
C34D4.8	WBGene00006113	str-48	none available	Seven TM Receptor
C34D4.9	WBGene00003527	nas-8	nas-8 encodes an astacin-like metalloprotease.	Nematode AStacin protease
C34E10.10	WBGene00016411	C34E10.10	none available	not known
C34E10.12	WBGene00303005	C34E10.12	none available	not known
C34E10.7	WBGene00000561	cnd-1	cnd-1 encodes a basic helix-loop-helix protein that is most Concise description: cnd-1 encodes a basic helix-loop-helix protein that is most closely related to the vertebrate NeuroD transcription factors; during development, CND-1 is predicted to function as a transcriptional regulator whose activity is required for several aspects of motor neuron fate specification, including cell division patte…	C. elegans Neuro D homolog
C34E11.3	WBGene00044079	tag-241	none available	Temporarily Assigned Gene name
C34E11.4	WBGene00007937	C34E11.4	none available	not known
C34E11.7	WBGene00138725	C34E11.7	none available	not known
C34E7.3	WBGene00007933	C34E7.3	none available	not known
C34E7.4	WBGene00007934	C34E7.4	none available	not known
C34F11.1	WBGene00016413	C34F11.1	none available	not known
C34F11.2	WBGene00016414	C34F11.2	none available	not known
C34F11.4	WBGene00003443	msp-50	msp-50 encodes a protein that belongs to a family of proteins Concise description: msp-50 encodes a protein that belongs to a family of proteins called the Major Sperm Proteins (MSPs) that is conserved in nematodes; this family consists of closely related, small, basic proteins that make up 15% of sperm protein; this multigene family consists of over fifty genes, including many pseudogenes; MSPs …	Major Sperm Protein
C34F11.5	WBGene00016416	C34F11.5	none available	not known
C34F11.6	WBGene00003442	msp-49	msp-49 encodes a protein that belongs to a family of proteins Concise description: msp-49 encodes a protein that belongs to a family of proteins called the Major Sperm Proteins (MSPs) that is conserved in nematodes; this family consists of closely related, small, basic proteins that make up 15% of sperm protein; this multigene family consists of over fifty genes, including many pseudogenes; MSPs …	Major Sperm Protein
C34F11.8	WBGene00016417	C34F11.8	none available	not known
C34F6.2	WBGene00000751	col-178	none available	COLlagen
C34F6.3	WBGene00000752	col-179	none available	COLlagen
C34F6.4	WBGene00002029	hst-2	hst-2 encodes the C. elegans ortholog of the heparan sulfate Concise description: hst-2 encodes the C. elegans ortholog of the heparan sulfate modifying enzyme 2O-sulfotransferase; by homology, HST-2 is predicted to function in heparan sulfate biosynthesis by catalyzing the chain-modifying sulfation of the C2 hydroxyl group of hexuronic acid; during development, hst-2 activity is required for nor…	Heparan SulphoTransferase
C34F6.5	WBGene00007939	C34F6.5	none available	not known
C34G6.2	WBGene00016419	tyr-4	none available	TYRosinase
C34G6.3	WBGene00016420	C34G6.3	none available	not known
C34G6.6	WBGene00016422	noah-1	noah-1 encodes a PAN and ZP domain-containing protein that Concise description: noah-1 encodes a PAN and ZP domain-containing protein that is related to the Drosophila extracellular matrix component NompA (no-mechanoreceptor-potential A); loss of noah-1 function via RNAi indicates that NOAH-1 activity is essential for molting; in addition, NOAH-1 appears to be required for embryonic and larval	NOmpA Homolog (Drosophila nompA: no mechanoreceptor potential Gene class description: NOmpA Homolog (Drosophila nompA: no mechanoreceptor potential
C34H4.1	WBGene00016424	C34H4.1	none available	not known
C34H4.2	WBGene00016425	C34H4.2	none available	not known
C34H4.3	WBGene00044073	tag-244	none available	Temporarily Assigned Gene name
C35A5.1	WBGene00000173	aqp-5	aqp-5 encodes a putative aquaporin with no known substrate, Concise description: aqp-5 encodes a putative aquaporin with no known substrate, since AQP-5 expressed in Xenopus oocytes has no effect on water, glycerol, or urea permeability; AQP-5 also has no function in mass RNAi assays, perhaps reflecting genetic redundancy with its paralogs AQP-4 and AQP-6; AQP-5 is expressed in I1	AQuaPorin or aquaglyceroporin related
C35A5.11	WBGene00044024	C35A5.11	none available	not known
C35A5.5	WBGene00007949	C35A5.5	none available	not known
C35A5.6	WBGene00007950	C35A5.6	none available	not known
C35A5.9	WBGene00007953	hda-11	none available	Histone DeAcetylase
C35B1.3	WBGene00016433	C35B1.3	none available	not known
C35B1.4	WBGene00016434	C35B1.4	none available	not known
C35B8.1	WBGene00000748	col-175	none available	COLlagen
C35B8.2	WBGene00006887	vav-1	vav-1 encodes a Rho/Rac-family guanine nucleotide exchange Concise description: vav-1 encodes a Rho/Rac-family guanine nucleotide exchange factor orthologous to the Vav proto-oncogene; VAV-1 is a complex protein with several domains, from N- to C-terminus: a calponin-like actin-binding domain; a RhoGEF/DH domain; a pleckstrin-like domain; a SH2 motif domain; and an SH3 domain; in C. elegans vav-1…	mammalian VAV (oncogene) related
C35C5.1	WBGene00004746	sdc-2	The sdc-2 gene encodes a protein that represses transcription Concise description: The sdc-2 gene encodes a protein that represses transcription of X chromosomes to achieve dosage compensation, and that also represses the male	Sex determination and Dosage Compensation defect
C35C5.4	WBGene00003239	mig-2	mig-2 encodes a member of the RhoG family of GTP-binding proteins; Concise description: mig-2 encodes a member of the RhoG family of GTP-binding proteins; MIG-2 activity is required for migration of Q neuroblasts, HSN neurons, and CAN cells as well as neurite outgrowth and guidance; in regulating Q neuroblast migration and dendrite outgrowth, MIG-2 functions upstream of the ANI-1 anillin to asymm…	abnormal cell MIGration
C35C5.8	WBGene00007957	C35C5.8	none available	not known
C35C5.9	WBGene00007958	C35C5.9	none available	not known
C35D10.13	WBGene00016449	C35D10.13	none available	not known
C35D10.15	WBGene00016451	clec-6	none available	C-type LECtin
C35D10.2	WBGene00016440	gipc-1	none available	GIPC (RGS-GAIP Interacting Protein C) homolog
C35D10.3	WBGene00016441	C35D10.3	none available	not known
C35D10.8	WBGene00016445	C35D10.8	none available	not known
C35D10.9	WBGene00000418	ced-4	ced-4 encodes a novel protein; along with CED-3, CED-4 is required Concise description: ced-4 encodes a novel protein; along with CED-3, CED-4 is required for the initiation of programmed cell death; accordingly, genetic analyses indicate that ced-3 and ced-4 function upstream of ced-1, ced-2, and nuc-1 in the programmed cell death pathway; in yeast two-hybrid experiments, and upon coexpression i…	CEll Death abnormality
C35D6.4	WBGene00007961	C35D6.4	C35D6.4 encodes a CCCH tandem zinc finger (TZF) protein; based Concise description: C35D6.4 encodes a CCCH tandem zinc finger (TZF) protein; based upon its sequence similarity to other TZF proteins, such as MEX-5 and POS-1, the	not known
C35E7.1	WBGene00016453	vet-2	none available	Very Early Transcript
C35E7.3	WBGene00016455	C35E7.3	none available	not known
C35E7.4	WBGene00016456	C35E7.4	none available	not known
C35E7.5	WBGene00016457	C35E7.5	none available	not known
C35E7.7	WBGene00016459	C35E7.7	none available	not known
C36A4.1	WBGene00007963	cyp-25A1	cyp-25A1 encodes one of ~80 C. elegans cytochrome P450s: membrane-associated, Concise description: cyp-25A1 encodes one of ~80 C. elegans cytochrome P450s: membrane-associated, heme-containing NADPH-dependent monooxygenases that catalyze the oxidative metabolism	CYtochrome P450 family
C36A4.11	WBGene00044167	C36A4.11	none available	not known
C36A4.2	WBGene00007964	cyp-25A2	none available	CYtochrome P450 family
C36A4.6	WBGene00007967	cyp-25A4	none available	CYtochrome P450 family
C36A4.8	WBGene00000264	brc-1	brc-1 encodes an ortholog of human BRCA1 (OMIM:113705, mutated Concise description: brc-1 encodes an ortholog of human BRCA1 (OMIM:113705, mutated in early onset breast and ovarian cancer) required for double-strand break repair via inter-sister recombination during meiosis; BRC-1 forms a heterodimer with BRD-1, which constitutes an E3 ubiquitin ligase; after irradiation, the DNA checkpoint prote…	BRCa homolog (tumor suppressor gene Brca1)
C36A4.9	WBGene00007969	acs-19	none available	fatty Acid CoA Synthetase family
C36B1.10	WBGene00007977	gska-3	none available	Glycogen Synthase Kinase Alpha subunit
C36B1.11	WBGene00007978	C36B1.11	none available	not known
C36B1.12	WBGene00007979	imp-1	imp-1 encodes an intramembrane aspartic protease orthologous Concise description: imp-1 encodes an intramembrane aspartic protease orthologous to the mammalian signal peptide peptidase-like family of proteins; by homology, IMP-1 is predicted to function in the cleavage of type II transmembrane proteins within their transmembrane domain; an imp-1::gfp reporter fusion is expressed primarily	IntraMembrane Protease (IMPAS) family
C36B1.13	WBGene00044120	C36B1.13	none available	not known
C36B1.6	WBGene00007973	C36B1.6	none available	not known
C36B1.7	WBGene00007974	dhfr-1	none available	DiHydroFolate Reductase
C36B1.8	WBGene00007975	gls-1	none available	Germ Line Survival
C36B7.6	WBGene00016469	C36B7.6	none available	not known
C36C5.12	WBGene00016481	C36C5.12	none available	not known
C36C9.1	WBGene00016485	meg-4	none available	Maternal Effect Germ-cell defective
C36C9.3	WBGene00016486	fbxa-170	This gene encodes a protein containing an F-box, a motif predicted Concise description: This gene encodes a protein containing an F-box, a motif predicted to mediate protein-protein interactions either with homologs of yeast Skp-1p or with other proteins; this gene's encoded protein also contains an FTH/DUF38 motif,	F-box A protein
C36E6.2	WBGene00016490	C36E6.2	none available	not known
C36E6.5	WBGene00003370	mlc-2	mlc-2 encodes, along with mlc-1 and mlc-4, one of three C. Concise description: mlc-2 encodes, along with mlc-1 and mlc-4, one of three C. elegans regulatory myosin light chains; MLC-2 is predicted to function as a regulator of myosin ATPase activity, and genetic studies indicate that MLC-2 is nearly essential in hermaphrodites for normal pharyngeal muscle function, but redundant with MLC-1, with…	Myosin Light Chain
C36E6.8	WBGene00044683	C36E6.8	none available	not known
C36F7.1	WBGene00007984	irx-1	irx-1 encodes a homeodomain-containing protein that is most Concise description: irx-1 encodes a homeodomain-containing protein that is most similar to members of the Iroquois subclass of TALE (three amino acid loop extension) superclass atypical homeodomain proteins; IRX-1 functions downstream of the UNC-55 nuclear receptor in a transcriptional regulatory network that controls remodeling	IRoquois subclass of homeoboX
C36F7.2	WBGene00007985	swah-1	none available	SoWAH (Drosophila) homolog
C36F7.4	WBGene00004372	rig-5	none available	neuRonal IGCAM
C36F7.5	WBGene00007986	C36F7.5	none available	not known
C36H8.1	WBGene00007987	C36H8.1	none available	not known
C36H8.3	WBGene00001452	flp-9	flp-9 encodes a predicted FMRFamide-like peptide neurotransmitter Concise description: flp-9 encodes a predicted FMRFamide-like peptide neurotransmitter that inhibits action potentials in the pharyngeal muscle when applied to the pharynx of dissected worms and inhibits movement when injected into A. suum; expressed at	FMRF-Like Peptide
C37A2.4	WBGene00000871	cye-1	cye-1 encodes the sole C. elegans E-type cyclin; CYE-1 is required Concise description: cye-1 encodes the sole C. elegans E-type cyclin; CYE-1 is required for progression through the mitotic cell cycle during embryonic, larval, and germline development; cye-1 is also required for endoreduplication in intestinal cells; CYE-1 is expressed ubiquitously in nuclei during embryonic development and post…	CYclin E
C37A2.6	WBGene00016492	C37A2.6	none available	not known
C37A5.11	WBGene00077520	C37A5.11	none available	not known
C37A5.2	WBGene00007989	fipr-22	none available	FIP (Fungus-Induced Protein) Related
C37C3.11	WBGene00016503	C37C3.11	none available	not known
C37C3.12	WBGene00016504	C37C3.12	none available	not known
C37C3.13	WBGene00016505	ttr-33	none available	TransThyretin-Related family domain
C37C3.6	WBGene00003242	mig-6	mig-6 encodes at least two protein isoforms (long and short) Concise description: mig-6 encodes at least two protein isoforms (long and short) that are highly similar to the extracellular matrix proteins papilin and lacunin; mig-6 is an essential gene required for embryonic hypodermal cell enclosure and normal excretory canal cell function in L1 larvae; MIG-6(S) activity is required cell nonauton…	abnormal cell MIGration
C37E2.2	WBGene00007994	C37E2.2	none available	not known
C37E2.4	WBGene00000457	ceh-36	ceh-36 encodes a paired-like homeodomain transcription factor Concise description: ceh-36 encodes a paired-like homeodomain transcription factor that is one of three orthodenticle (OTX/OTD) homeodomain proteins in C. elegans (the others being TTX-1 and CEH-37); CEH-36 is required broadly for specification of the AWC olfactory neuron and also for establishing the left-right asymmetry of the ASEL a…	C. Elegans Homeobox
C37H5.1	WBGene00003591	nex-4	nex-4 encodes a predicted annexin.	anNEXin family
C37H5.10	WBGene00000859	cwp-1	cwp-1 encodes a nematode-specific protein that is coexpressed Concise description: cwp-1 encodes a nematode-specific protein that is coexpressed	Coexpressed With Polycystins
C37H5.13	WBGene00016511	C37H5.13	none available	not known
C37H5.2	WBGene00016506	abhd-5.1	none available	ABHydrolase Domain containing homolog
C37H5.9	WBGene00003528	nas-9	nas-9 encodes an astacin-like metalloprotease; loss of nas-9 Concise description: nas-9 encodes an astacin-like metalloprotease; loss of nas-9 activity via RNAi results in low levels (6%) of embryonic lethality; a nas-9::GFP	Nematode AStacin protease
C38C10.1	WBGene00006576	tkr-1	tkr-1 encodes a G protein-coupled receptor that is the C. elegans Concise description: tkr-1 encodes a G protein-coupled receptor that is the C. elegans tachykinin-like neuropeptide receptor homolog; by homology, TKR-1 is predicted to function in modulation of excitatory neurotransmission; as loss of tkr-1 activity via RNAi results in moderate reduction of fat content, TKR-1 may play a specific r…	TachyKinin Receptor family
C38C10.3	WBGene00008001	C38C10.3	none available	not known
C38C10.4	WBGene00001689	gpr-2	gpr-2 encodes a protein containing a GPR (G Protein Regulator)/GoLoco Concise description: gpr-2 encodes a protein containing a GPR (G Protein Regulator)/GoLoco motif characteristic of guanine nucleotide exchange factors specific for G-alpha GTPases; GPR-2 appears to function redundantly during early embryogenesis and germ-line development to regulate chromosome and spindle movements during cell …	G Protein Regulator
C38C10.6	WBGene00008002	nlp-48	none available	Neuropeptide-Like Protein
C38C3.10	WBGene00045390	C38C3.10	none available	not known
C38C3.3	WBGene00016512	C38C3.3	none available	not known
C38C3.4	WBGene00016513	C38C3.4	none available	not known
C38C3.9	WBGene00016517	nhr-260	none available	Nuclear Hormone Receptor family
C38C5.1	WBGene00016518	C38C5.1	none available	not known
C38C6.3	WBGene00007996	C38C6.3	none available	not known
C38C6.6	WBGene00007999	tag-297	none available	Temporarily Assigned Gene name
C38C6.7	WBGene00045161	lfor-2	none available	Lin-Forty One (41) associated non-coding Rna (RNA)
C38D4.1	WBGene00008003	enu-3.2	none available	ENhancer of Uncoordination
C38D4.6	WBGene00003912	pal-1	pal-1 encodes a homeodomain protein that is the C. elegans Concise description: pal-1 encodes a homeodomain protein that is the C. elegans Caudal ortholog; PAL-1 is required maternally and embryonically for specification of the C and D posterior blastomere fates and thus, for proper bodywall muscle and hypodermal development during embryogenesis; PAL-1 is also required postembryonically for fate …	Posterior ALae in males
C38D9.11	WBGene00044960	fbxa-173	none available	F-box A protein
C38D9.8	WBGene00008016	C38D9.8	This gene encodes a protein containing an F-box, a motif predicted Concise description: This gene encodes a protein containing an F-box, a motif predicted to mediate protein-protein interactions either with homologs of yeast Skp-1p or	not known
C38H2.1	WBGene00008018	tbc-8	none available	TBC (Tre-2/Bub2/Cdc16) domain family
C39B10.1	WBGene00008021	C39B10.1	none available	not known
C39B10.5	WBGene00008025	C39B10.5	none available	not known
C39B10.7	WBGene00164973	C39B10.7	none available	not known
C39B10.9	WBGene00194800	linc-83	none available	Long Intervening Non-Coding RNA
C39B5.4	WBGene00016522	fbxa-38	This gene encodes a protein containing an F-box, a motif predicted Concise description: This gene encodes a protein containing an F-box, a motif predicted to mediate protein-protein interactions either with homologs of yeast Skp-1p or with other proteins; this gene's encoded protein also contains an FTH/DUF38 motif,	F-box A protein
C39B5.5	WBGene00016523	C39B5.5	none available	not known
C39D10.11	WBGene00043983	C39D10.11	none available	not known
C39D10.2	WBGene00016530	C39D10.2	none available	not known
C39D10.5	WBGene00016532	C39D10.5	none available	not known
C39D10.7	WBGene00016534	C39D10.7	C39D10.7 encodes a large (1185-residue) protein with 11 chitin-binding Concise description: C39D10.7 encodes a large (1185-residue) protein with 11 chitin-binding peritrophin-A domains; C39D10.7 transcripts are enriched in hermaphrodites; like CEJ-1 and CPG-2, C39D10.7 might participate in eggshell synthesis and early embryonic development, and C39D10.7's multiple peritrophin-A domains might enab…	not known
C39D10.8	WBGene00016535	C39D10.8	none available	not known
C39E9.10	WBGene00008033	spin-2	none available	SPINster (Drosophila lysosomal permease) homolog
C39E9.11	WBGene00008034	C39E9.11	C39E9.11 is orthologous to the human gene PAPILLARY RENAL CELL Concise description: C39E9.11 is orthologous to the human gene PAPILLARY RENAL CELL CARCINOMA (TRANSLOCATION-ASSOCIATED) (PRCC; OMIM:179755), which when mutated leads	not known
C39E9.12	WBGene00008035	C39E9.12	none available	not known
C39E9.13	WBGene00004339	rfc-3	none available	RFC (DNA replication factor) family
C39E9.2	WBGene00008027	scl-5	scl-5 encodes a predicted extracellular protein that is a member Concise description: scl-5 encodes a predicted extracellular protein that is a member	SCP-Like extracellular protein
C39E9.5	WBGene00008029	scl-7	scl-7 encodes a predicted extracellular protein that is a member Concise description: scl-7 encodes a predicted extracellular protein that is a member	SCP-Like extracellular protein
C39E9.6	WBGene00008030	scl-8	scl-8 encodes a predicted extracellular protein that is a member Concise description: scl-8 encodes a predicted extracellular protein that is a member	SCP-Like extracellular protein
C39E9.7	WBGene00008031	C39E9.7	none available	not known
C39E9.8	WBGene00008032	C39E9.8	none available	not known
C39F7.1	WBGene00016538	C39F7.1	none available	not known
C39H7.1	WBGene00016541	C39H7.1	none available	not known
C40A11.1	WBGene00016544	math-18	none available	MATH (meprin-associated Traf homology) domain containing
C40A11.10	WBGene00016553	mir-8199	none available	MIcro RNA
C40A11.2	WBGene00016545	C40A11.2	none available	not known
C40A11.3	WBGene00016546	C40A11.3	none available	not known
C40A11.4	WBGene00016547	C40A11.4	none available	not known
C40A11.6	WBGene00016549	C40A11.6	none available	not known
C40A11.7	WBGene00016550	C40A11.7	none available	not known
C40C9.2	WBGene00000048	acr-9	acr-9 encodes a predicted member of the alpha subunit family Concise description: acr-9 encodes a predicted member of the alpha subunit family	AcetylCholine Receptor
C40C9.3	WBGene00008036	C40C9.3	none available	not known
C40H1.5	WBGene00008040	ttr-5	C40H1.5 encodes a protein containing a predicted signal sequence Concise description: C40H1.5 encodes a protein containing a predicted signal sequence followed by a transthyretin-like domain; the product of C40H1.5 belongs to a family	TransThyretin-Related family domain
C40H1.8	WBGene00008043	C40H1.8	none available	not known
C41C4.1	WBGene00008050	chst-1	chst-1 encodes for a chondroitin sulfate (CS) 4-O-sulfotransferase Concise description: chst-1 encodes for a chondroitin sulfate (CS) 4-O-sulfotransferase in C. elegans and shows similarity to human CS 4-O-sulfotransferases; loss of chst-1 leads to lack of sulfation at the C4-position of galactosamine in CS and reduced	CarboHydrate SulfoTransferase
C41C4.18	WBGene00219854	C41C4.18	none available	not known
C41C4.2	WBGene00005150	sre-2	none available	Serpentine Receptor, class E (epsilon)
C41C4.3	WBGene00008051	lron-4	none available	eLRR (extracellular Leucine-Rich Repeat) ONly
C41C4.5	WBGene00006832	unc-105	unc-105 encodes a muscle degenerin, a mechanosensory membrane Concise description: unc-105 encodes a muscle degenerin, a mechanosensory membrane channel that is a member of the degenerin ion channel superfamily and similar to subunits of the mammalian amiloride-sensitive epithelial sodium channel (ENaC, OMIM:600761); UNC-105 is required for normal growth and for normal contraction and organizatio…	UNCoordinated
C41C4.6	WBGene00006739	ulp-4	none available	Ubiquitin-Like Protease
C41D11.10	WBGene00195180	C41D11.10	none available	not known
C41D11.3	WBGene00016562	C41D11.3	none available	not known
C41D11.5	WBGene00016564	cmt-1	none available	p31CoMeT related
C41D11.8	WBGene00000787	cps-6	cps-6 encodes an ortholog of human mitochondrial endonuclease Concise description: cps-6 encodes an ortholog of human mitochondrial endonuclease G (EndoG) that promotes apoptosis, and is required to degrade nicked (TUNEL-positive) DNA in apoptotic cells; transgenic CPS-6 is localized to mitochondria, but transgenic CPS-6 lacking a mitochondrial localization sequence is found in nuclei, and nuclei…	CED-3 Protease Suppressor
C41D11.9	WBGene00016567	C41D11.9	C41D11.9 encodes an ortholog of Drosophila ALMONDEX, and thus Concise description: C41D11.9 encodes an ortholog of Drosophila ALMONDEX, and thus	not known
C41G11.1	WBGene00016568	C41G11.1	none available	not known
C41G11.4	WBGene00016570	gnrr-4	none available	human GoNadotropin-Releasing hormone Receptor (GnRHR) related
C41G6.2	WBGene00005759	srw-12	none available	Serpentine Receptor, class W
C41G7.1	WBGene00004887	smn-1	smn-1 encodes a homolog of human SMN, which when mutated leads Concise description: smn-1 encodes a homolog of human SMN, which when mutated leads	SMN (human Survival Motor Neuron gene) homolog
C41G7.3	WBGene00008061	C41G7.3	none available	not known
C41G7.4	WBGene00008062	set-32	set-32 encodes a divergent histone H3 lysine-9 (H3K9) methyltransferase Concise description: set-32 encodes a divergent histone H3 lysine-9 (H3K9) methyltransferase homolog with a SET domain; SET-32 has no obvious non-nematode orthologs, but several paralogs (SET-6, SET-13, SET-15, SET-19, SET-20, and SET-21); set-32(ok1457) has	SET (trithorax/polycomb) domain containing
C41G7.5	WBGene00000096	ahr-1	ahr-1 encodes an aryl hydrocarbon receptor (ligand-activated Concise description: ahr-1 encodes an aryl hydrocarbon receptor (ligand-activated basic helix-loop-helix transcription factor) ortholog that biochemically resembles its vertebrate relatives (OMIM:600253) which mediate the carcinogenic and teratogenic effects of environmental toxins; AHR-1 activity is required for specification of RMEL a…	Aryl Hydrocarbon Receptor related
C41G7.7	WBGene00008064	C41G7.7	none available	not known
C41G7.8	WBGene00077525	C41G7.8	none available	not known
C41H7.3	WBGene00016573	C41H7.3	none available	not known
C41H7.4	WBGene00016574	C41H7.4	none available	not known
C41H7.6	WBGene00016576	C41H7.6	none available	not known
C41H7.7	WBGene00016577	clec-3	none available	C-type LECtin
C41H7.8	WBGene00016578	sdz-5	none available	SKN-1 Dependent Zygotic transcript
C42C1.2	WBGene00016580	C42C1.2	none available	not known
C42D4.1	WBGene00016594	C42D4.1	none available	not known
C42D4.2	WBGene00016595	C42D4.2	none available	not known
C42D4.6	WBGene00004822	skr-16	The skr-16 gene encodes a homolog of Skp1 in S. cerevisiae Concise description: The skr-16 gene encodes a homolog of Skp1 in S. cerevisiae that has no known function in vivo, since skr-16(RNAi) animals are at least superficially	SKp1 Related (ubiquitin ligase complex component)
C42D8.2	WBGene00006926	vit-2	vit-2 encodes the vitellogenin homolog YP170; vit-2 is expressed Concise description: vit-2 encodes the vitellogenin homolog YP170; vit-2 is expressed in the adult hermaphrodite intestine and VIT-2 is secreted into the pseudocoelomic space before being taken up by developing oocytes; vit-2 expression is regulated in a sex-, stage-, and tissue-specific manner by the ELT-2/GATA and MAB-3 transcript…	VITellogenin structural genes (yolk protein genes)
C42D8.5	WBGene00000039	acn-1	acn-1 encodes an ACE-like protein required for larval development Concise description: acn-1 encodes an ACE-like protein required for larval development and adult morphogenesis, and probably for cell fusion in larval seam cells; ACN-1 lacks not only the HExxH consensus metallopeptidase motif, but also other active site residues found in the sequence HEAI/VxD of mammalian and insect ACEs; acn-1 is…	ACE (angiotensin converting enzyme)-like Non-peptidase
C43C3.3	WBGene00001123	dyf-7	dyf-7 encodes a protein containing a single-pass transmembrane Concise description: dyf-7 encodes a protein containing a single-pass transmembrane domain, a small cytoplasmic domain, and a large extra-cellular/luminal domain related to that of zona pellucida (ZP) proteins, components of the matrix surrounding vertebrate	none available
C43D7.10	WBGene00077441	C43D7.10	none available	not known
C43D7.11	WBGene00077664	C43D7.11	none available	not known
C43D7.2	WBGene00008066	fbxb-65	This gene encodes a protein containing an F-box, a motif predicted Concise description: This gene encodes a protein containing an F-box, a motif predicted to mediate protein-protein interactions either with homologs of yeast Skp-1p or	F-box B protein
C43D7.6	WBGene00005418	srh-208	This gene encodes a protein containing an F-box, a motif predicted Concise description: This gene encodes a protein containing an F-box, a motif predicted to mediate protein-protein interactions either with homologs of yeast Skp-1p or	Serpentine Receptor, class H
C43D7.8	WBGene00008070	C43D7.8	This gene encodes a protein containing an F-box, a motif predicted Concise description: This gene encodes a protein containing an F-box, a motif predicted to mediate protein-protein interactions either with homologs of yeast Skp-1p or	not known
C43E11.3	WBGene00016603	met-1	met-1 encodes a histone methyltransferase whose SET domain Concise description: met-1 encodes a histone methyltransferase whose SET domain is similar to that of Saccharomyces cerevisiae Set2p; loss of met-1 activity in the background of a mutant class A synMuv gene, such as lin-15A, results in a multivulval phenotype, indicating that met-1 acts to negatively regulate vulval cell fate specificatio…	histone METhyltransferase-like
C43E11.6	WBGene00003516	nab-1	nab-1 encodes a PDZ and SAM domain-containing protein that Concise description: nab-1 encodes a PDZ and SAM domain-containing protein that is the sole C. elegans ortholog of the mammalian Neurabin/Spinophilin proteins; by homology, NAB-1 is predicted to interact with F-actin, ZYG-8/Doublecortin and the SAD-1 serine/threonine kinase to regulate interactions between the actin and microtubule networ…	NeurABin
C43E11.9	WBGene00016607	C43E11.9	none available	not known
C43F9.11	WBGene00045024	C43F9.11	none available	not known
C43F9.6	WBGene00008074	nkb-2	none available	Na+/K+ ATPase, Beta subunit
C43G2.3	WBGene00016612	C43G2.3	none available	not known
C43H6.8	WBGene00001959	hlh-15	hlh-15 encodes one of 42 C. elegans basic helix-loop-helix Concise description: hlh-15 encodes one of 42 C. elegans basic helix-loop-helix transcription factors; HLH-15 physically interacts with HLH-2, the C. elegans E/Daughterless	Helix Loop Helix
C44B11.4	WBGene00016634	C44B11.4	none available	not known
C44B11.6	WBGene00016635	C44B11.6	none available	not known
C44B11.9	WBGene00219661	linc-45	none available	Long Intervening Non-Coding RNA
C44B12.1	WBGene00016636	perm-2	none available	PERMeable eggshell
C44B12.3	WBGene00016637	C44B12.3	none available	not known
C44B12.5	WBGene00016638	perm-4	none available	PERMeable eggshell
C44B7.10	WBGene00016630	acer-1	none available	ACEtyl-CoA Regulator
C44B7.12	WBGene00016632	C44B7.12	none available	not known
C44B7.3	WBGene00016625	aff-1	aff-1 encodes a cell-surface protein required in late L4 larvae Concise description: aff-1 encodes a cell-surface protein required in late L4 larvae for various cell fusions, of which at least one (AC-utse) does not require EFF-1; in vulval development, AFF-1 is required for fusion of the anchor cell (AC) with the utse syncytium, of A cells to one another, and of D cells to one another; AFF-1 is …	Anchor cell Fusion Failure
C44B7.5	WBGene00016627	C44B7.5	none available	not known
C44B7.6	WBGene00016628	slc-36.5	none available	SLC (SoLute Carrier) homolog
C44B7.7	WBGene00016629	C44B7.7	none available	not known
C44B9.1	WBGene00008078	vps-50	none available	related to yeast Vacuolar Protein Sorting factor
C44B9.2	WBGene00008079	C44B9.2	none available	not known
C44B9.3	WBGene00008080	C44B9.3	none available	not known
C44B9.4	WBGene00008081	athp-1	none available	AT Hook plus PHD finger transcription factor
C44B9.6	WBGene00043996	fbxb-87	This gene encodes a protein containing an F-box, a motif predicted Concise description: This gene encodes a protein containing an F-box, a motif predicted to mediate protein-protein interactions either with homologs of yeast Skp-1p or	F-box B protein
C44C1.1	WBGene00016641	C44C1.1	none available	not known
C44C1.4	WBGene00016643	vps-45	none available	related to yeast Vacuolar Protein Sorting factor
C44C1.5	WBGene00016644	abhd-3.2	none available	ABHydrolase Domain containing homolog
C44C1.6	WBGene00016645	C44C1.6	none available	not known
C44C10.3	WBGene00008084	C44C10.3	none available	not known
C44C10.4	WBGene00008085	smcl-1	none available	SMC (Structural Maintenance of Chromosomes) Like
C44C10.8	WBGene00001981	hnd-1	hnd-1 encodes a Hand bHLH transcription factor required for Concise description: hnd-1 encodes a Hand bHLH transcription factor required for normal viability, gonadogenesis, and posterior body morphology; HND-1 is required for the formation of both somatic gonadal precursors and primordial germ cells, but not for later gonadogenesis; HND-1 is expressed embryogenesis in embryonic mesodermal precur…	HAND bHLH transcription factor family
C44F1.3	WBGene00002267	lec-4	lec-4 encodes a predicted galectin that exhibits sugar binding Concise description: lec-4 encodes a predicted galectin that exhibits sugar binding	gaLECtin
C44H4.1	WBGene00008093	lron-1	none available	eLRR (extracellular Leucine-Rich Repeat) ONly
C44H4.2	WBGene00002282	let-4	let-4 encodes an extracellular leucine-rich repeat only protein; Concise description: let-4 encodes an extracellular leucine-rich repeat only protein; let-4 was originally identified in a screen for essential genes, and let-4 mutants exhibit early larval lethality; let-4 is required for organization of the apical extracellular matrix, and is involved in excretory cell canal morphology and renal	LEThal
C44H4.3	WBGene00006366	sym-1	sym-1 encodes a protein containing 15 contiguous leucine-rich Concise description: sym-1 encodes a protein containing 15 contiguous leucine-rich repeats (LRRs) that functionally overlaps with sym-5 and interacts with mec-8 with respect to embryonic viability and attachment of body muscle to the extracellular cuticle; expression begins at the time of embryonic elongation and SYM-1 is secreted from…	SYnthetic lethal with Mec
C44H9.1	WBGene00008097	ugt-15	none available	UDP-GlucuronosylTransferase
C44H9.4	WBGene00008099	C44H9.4	none available	not known
C44H9.5	WBGene00008100	C44H9.5	none available	not known
C44H9.7	WBGene00008102	C44H9.7	none available	not known
C45B11.6	WBGene00045379	C45B11.6	none available	not known
C45B11.7	WBGene00050945	C45B11.7	none available	not known
C45B11.8	WBGene00077699	C45B11.8	none available	not known
C45B11.9	WBGene00185117	C45B11.9	none available	not known
C45B2.1	WBGene00016658	C45B2.1	none available	not known
C45B2.7	WBGene00004219	ptr-4	ptr-4 encodes a nematode-specific member of the sterol sensing Concise description: ptr-4 encodes a nematode-specific member of the sterol sensing domain (SSD) proteins, distantly paralogous to Drosophila PATCHED (PTC) and human PTCH (OMIM:601309, mutated in basal cell nevus syndrome); PTR-4 is strongly required for normal molting from L4 to adult stages male tail development (a role conserved in…	PaTched Related family
C45E1.4	WBGene00016663	C45E1.4	none available	not known
C45E5.3	WBGene00016666	C45E5.3	none available	not known
C45E5.4	WBGene00016667	C45E5.4	none available	not known
C45E5.6	WBGene00003636	nhr-46	none available	Nuclear Hormone Receptor family
C45G3.1	WBGene00008107	aspm-1	aspm-1 encodes a protein, with one N-terminal calponin-homology Concise description: aspm-1 encodes a protein, with one N-terminal calponin-homology domain and two IQ calmodulin-binding domains, that is orthologous to Drosophila Asp (Abnormal Spindles) and to human ASPM (OMIM:605481), which when mutated leads to primary microcephaly; in C. elegans, ASPM-1 is required for the forces that regulate …	mammalian ASPM (Abnormal SPindles & primary Microcephaly) Gene class description: mammalian ASPM (Abnormal SPindles & primary Microcephaly)
C45G3.3	WBGene00001590	C45G3.3	none available	not known
C45G7.2	WBGene00016669	ilys-2	none available	Invertebrate LYSozyme
C45G7.3	WBGene00016670	ilys-3	none available	Invertebrate LYSozyme
C45G7.4	WBGene00016671	C45G7.4	none available	not known
C45G7.5	WBGene00000402	cdh-10	cdh-10 encodes a member of the cadherin superfamily.	CaDHerin family
C45G9.10	WBGene00016681	C45G9.10	none available	not known
C45G9.11	WBGene00016682	C45G9.11	none available	not known
C45G9.12	WBGene00016683	C45G9.12	none available	not known
C45G9.13	WBGene00016684	nlp-43	none available	Neuropeptide-Like Protein
C45G9.2	WBGene00016674	C45G9.2	none available	not known
C45G9.6	WBGene00016677	C45G9.6	none available	not known
C45G9.7	WBGene00016678	C45G9.7	none available	not known
C45G9.8	WBGene00016679	C45G9.8	none available	not known
C45G9.9	WBGene00016680	C45G9.9	none available	not known
C45H4.11	WBGene00016693	srbc-20	none available	Serpentine Receptor, class BC (class B-like)
C45H4.14	WBGene00016695	C45H4.14	none available	not known
C45H4.2	WBGene00016686	cyp-33C1	none available	CYtochrome P450 family
C46A5.1	WBGene00016698	C46A5.1	none available	not known
C46A5.15	WBGene00219858	C46A5.15	none available	not known
C46A5.4	WBGene00016700	C46A5.4	none available	not known
C46A5.8	WBGene00016703	rdl-1	none available	Rentinal Degeneration 3-Like
C46A5.9	WBGene00001827	hcf-1	hcf-1 encodes the C. elegans ortholog of human host cell factor Concise description: hcf-1 encodes the C. elegans ortholog of human host cell factor (HCF-1), a transcriptional regulator that associates with histone modification enzymes and plays a role in cell cycle progression; in C. elegans, hcf-1 plays a role in regulation of cell division and mitotic histone modification; in addition, HCF-1 f…	human HCF1 related
C46C11.4	WBGene00044567	C46C11.4	none available	not known
C46C2.5	WBGene00008113	C46C2.5	none available	not known
C46C2.6	WBGene00008114	C46C2.6	none available	not known
C46E1.3	WBGene00001362	exc-1	exc-1 was identified in screens for mutations that result in Concise description: exc-1 was identified in screens for mutations that result in abnormal excretory canals; exc-1 is defined by a single allele, rh26, that produces focal, spherical cysts that are flanked by normal canals and frequently lie near the canal ending; genetic epistasis analyses suggests that exc-1 functions downstream of ex…	EXCretory canal abnormal
C46E10.1	WBGene00016707	C46E10.1	none available	not known
C46E10.4	WBGene00016710	fbxc-52	none available	F-box C protein
C46E10.5	WBGene00016711	fbxc-53	none available	F-box C protein
C46F11.6	WBGene00008121	C46F11.6	none available	not known
C46F9.1	WBGene00016717	math-22	none available	MATH (meprin-associated Traf homology) domain containing
C46G7.5	WBGene00044502	C46G7.5	none available	not known
C46H11.11	WBGene00016735	fhod-1	none available	Formin HOmology Domain
C46H11.2	WBGene00016728	C46H11.2	none available	not known
C46H11.7	WBGene00016731	C46H11.7	none available	not known
C46H11.8	WBGene00016732	phat-1	none available	PHAryngeal gland Toxin-related
C46H3.1	WBGene00016724	C46H3.1	none available	not known
C46H3.2	WBGene00016725	C46H3.2	none available	not known
C47A10.1	WBGene00004003	pgp-9	pgp-9 encodes an ATP-binding protein that is a member of the Concise description: pgp-9 encodes an ATP-binding protein that is a member of the P-glycoprotein subclass of the ATP-binding cassette (ABC) transporter superfamily; PGP-9 is predicted to function as a transmembrane protein that couples energy to transport of various molecules across membranes, and loss of pgp-9 activity via RNAi can res…	P-GlycoProtein related
C47A10.5	WBGene00008127	ddo-1	ddo-1 encodes a D-aspartate oxidase (DASPO), paralogous to Concise description: ddo-1 encodes a D-aspartate oxidase (DASPO), paralogous to DDO-2 and DDO-3; recombinant DDO-1 has DASPO acvitity on acidic D-amino acid substrates (e.g., D-aspartate, D-glutamate, or N-methyl-D-aspartate/NMDA), with highest catalytic efficiency on D-glutamate; since the C-terminal residues of DDO-1 match the PTS1	D-aspartate (D) Oxidase
C47A4.2	WBGene00008123	ent-4	none available	Equilibrative Nucleoside Transporter
C47A4.3	WBGene00008124	C47A4.3	none available	not known
C47B2.3	WBGene00006529	tba-2	tba-2 encodes an alpha-tubulin.	TuBulin, Alpha
C47C12.3	WBGene00004335	ref-2	ref-2 encodes a zinc-finger transcription factor of the Opa/Zic Concise description: ref-2 encodes a zinc-finger transcription factor of the Opa/Zic family and is similar to the human proteins ZIC1 and ZIC2 (zinc finger protein of cerebellum 1/2); ref-2 in elegans is required for both the generation of the Pn.p ventral epideraml cells, and to maintain them in an unfused state, in both hermaphrodi…	REgulator of Fusion
C47D12.1	WBGene00007028	trr-1	trr-1 encodes proteins with similarity to the atypical protein Concise description: trr-1 encodes proteins with similarity to the atypical protein kinases of the TRAAP subfamily of PIKK kinases that are found in multisubunit, chromatin-modifying histone acetyltransferase complexes; trr-1 functions as a negative regulator of let-60/Ras signaling and was initially identified in screens for synMuv g…	TRRAP-like (transcription/transformation domain-associated Gene class description: TRRAP-like (transcription/transformation domain-associated
C47D12.4	WBGene00008138	C47D12.4	This gene encodes a protein containing an F-box, a motif predicted Concise description: This gene encodes a protein containing an F-box, a motif predicted to mediate protein-protein interactions either with homologs of yeast Skp-1p or	not known
C47D12.5	WBGene00008139	C47D12.5	none available	not known
C47D12.7	WBGene00002184	kel-1	kel-1 encodes a BTB/POZ- and Kelch motif-containing protein Concise description: kel-1 encodes a BTB/POZ- and Kelch motif-containing protein orthologous to Drosophila Kelch, which is essential for actin organization in ovarian ring canals; in C. elegans, kel-1 is required for regulating feeding during larval development and more specifically, for pharyngeal isthmus peristalsis and efficient trapp…	KELch-repeat containing protein
C47D2.1	WBGene00016738	C47D2.1	none available	not known
C47E12.6	WBGene00008150	mam-2	none available	MAM (Meprin, A5-protein, PTPmu) domain protein
C47E12.9	WBGene00008152	C47E12.9	none available	not known
C47E8.3	WBGene00008142	C47E8.3	none available	not known
C47E8.4	WBGene00008143	C47E8.4	C47E8.4 encodes a conserved protein that is a member of the Concise description: C47E8.4 encodes a conserved protein that is a member of the FAM50A/XAP5 family of proteins; loss of C47E8.4 activity via RNAi results in some embryonic and larval lethality as well as animals that are thin and paralyzed; in age-1 long-lived mutants, loss of C47E8.4 results in a small, but reproducible, reduction in l…	not known
C47E8.7	WBGene00006836	unc-112	The unc-112 gene encodes a pleckstrin homology domain-containing Concise description: The unc-112 gene encodes a pleckstrin homology domain-containing protein, orthologous to human Mitogen inducible gene-2, that is required for assembly of muscle dense bodies and M lines during embryogenesis; UNC-112 is a dense body/M-line component and requires PAT-3/beta-integrin, UNC-52/perlecan, and PAT-4/int…	UNCoordinated
C47F8.1	WBGene00008157	C47F8.1	This gene encodes a protein containing an F-box, a motif predicted Concise description: This gene encodes a protein containing an F-box, a motif predicted to mediate protein-protein interactions either with homologs of yeast Skp-1p or	not known
C47F8.2	WBGene00008158	nhr-165	none available	Nuclear Hormone Receptor family
C47F8.7	WBGene00008163	C47F8.7	none available	not known
C47G2.1	WBGene00000851	cut-1	cut-1 encodes a component of cuticlin, an insoluble residue Concise description: cut-1 encodes a component of cuticlin, an insoluble residue of the nematode cuticle required for alae formation and radial shrinking during dauer differentiation; expressed specifically in the cuticle of dauer larvae and	CUTiclin
C47G2.5	WBGene00008166	saps-1	none available	SAPS (phosphatase associated) domain protein
C48B4.1	WBGene00008167	acox-1.5	none available	Acyl-Coenzyme A OXidase
C48B4.12	WBGene00008175	C48B4.12	none available	not known
C48B4.3	WBGene00008168	C48B4.3	none available	not known
C48B4.8	WBGene00008171	C48B4.8	none available	not known
C48B4.9	WBGene00008172	C48B4.9	none available	not known
C48B6.8	WBGene00016744	bbs-9	bbs-9 is orthologous to the human parathyroid hormone-responsive Concise description: bbs-9 is orthologous to the human parathyroid hormone-responsive B1 gene, also known as BBS9; bbs-9 apart from being required for proper cilium morphology and function, is also required, similar to bbs-1, bbs-5, and bbs-8, for the regulation of insulin release from sensory neurons; bbs-9 mutants exhibit an incre…	BBS (Bardet-Biedl Syndrome) protein
C48B6.9	WBGene00016745	C48B6.9	none available	not known
C48C5.1	WBGene00016747	nmur-1	none available	NMUR (NeuroMedin U Receptor) homolog
C48C5.3	WBGene00016748	aexr-3	none available	AEX-2 related neuropeptide Receptor
C48D1.2	WBGene00000417	ced-3	ced-3 encodes a caspase, a cysteine-aspartate protease; CED-3 Concise description: ced-3 encodes a caspase, a cysteine-aspartate protease; CED-3 activity is required for execution of apoptosis and functions in a conserved genetic	CEll Death abnormality
C48D1.3	WBGene00000501	cho-1	cho-1 encodes a high-affinity choline transporter orthologous Concise description: cho-1 encodes a high-affinity choline transporter orthologous to members of the sodium-dependent glucose transporter family; CHO-1 is expressed	CHOline transporter
C48D1.5	WBGene00008178	C48D1.5	none available	not known
C48D5.3	WBGene00008180	C48D5.3	none available	not known
C48E7.6	WBGene00016751	C48E7.6	none available	not known
C48E7.7	WBGene00016752	C48E7.7	none available	not known
C48E7.8	WBGene00016753	oac-9	none available	O-ACyltransferase homolog
C49A1.1	WBGene00008184	C49A1.1	none available	not known
C49A1.3	WBGene00008186	best-11	none available	BESTrophin (chloride channel) homolog
C49A1.4	WBGene00001377	eya-1	eya-1 encodes a protein orthologous to the Eyes absent/Eya Concise description: eya-1 encodes a protein orthologous to the Eyes absent/Eya Drosophila protein which is involved in eye development and has protein tyrosine phosphatase ; RNA interference and mutant studies indicate that eya-1 is involved in embryonic and larval tissue morphogenesis as well as larval viability; eya-1 mutants show incr…	EYA (Drosophila eyes absent) homolog
C49A9.3	WBGene00016757	C49A9.3	none available	not known
C49A9.4	WBGene00016758	C49A9.4	C49A9.4 is orthologous to the human gene CYSTATIN B (STEFIN Concise description: C49A9.4 is orthologous to the human gene CYSTATIN B (STEFIN	not known
C49C3.1	WBGene00004908	snf-9	none available	Sodium: Neurotransmitter symporter Family
C49C3.10	WBGene00008200	C49C3.10	none available	not known
C49C3.11	WBGene00008201	C49C3.11	none available	not known
C49C3.12	WBGene00008202	clec-197	none available	C-type LECtin
C49C3.20	WBGene00185097	C49C3.20	none available	not known
C49C3.6	WBGene00008196	C49C3.6	none available	not known
C49C8.4	WBGene00016768	cyp-33E1	none available	CYtochrome P450 family
C49C8.5	WBGene00016769	C49C8.5	none available	not known
C49C8.8	WBGene00235271	C49C8.8	none available	not known
C49D10.11	WBGene00016779	sdz-7	none available	SKN-1 Dependent Zygotic transcript
C49F5.10	WBGene00219571	linc-15	none available	Long Intervening Non-Coding RNA
C49F5.11	WBGene00219859	C49F5.11	none available	not known
C49F5.2	WBGene00008206	set-6	set-6 encodes a putative histone H3 lysine-9 methyltransferase; Concise description: set-6 encodes a putative histone H3 lysine-9 methyltransferase; SET-6 has no non-nematode orthologs, but several paralogs (SET-13, SET-15, SET-19, SET-20, SET-21, and SET-32); neither set-6(tm1611) nor set-6(RNAi) have any obvious	SET (trithorax/polycomb) domain containing
C49F5.3	WBGene00008207	C49F5.3	none available	not known
C49F5.4	WBGene00008208	nhr-167	none available	Nuclear Hormone Receptor family
C49F5.5	WBGene00008209	C49F5.5	none available	not known
C49F5.6	WBGene00008210	C49F5.6	none available	not known
C49F5.7	WBGene00008211	C49F5.7	none available	not known
C49G7.10	WBGene00016788	C49G7.10	none available	not known
C49G7.12	WBGene00077593	C49G7.12	none available	not known
C49G7.3	WBGene00016781	C49G7.3	none available	not known
C49G7.4	WBGene00016782	phat-3	none available	PHAryngeal gland Toxin-related
C49G7.5	WBGene00016783	irg-2	irg-2 encodes a novel protein, conserved amongst nematodes; Concise description: irg-2 encodes a novel protein, conserved amongst nematodes; irg-2 expression is induced in response to infection by virulent strains of Pseudomonas aeruginosa in a manner dependent upon the bZIP transcription factor ZIP-2, but independent	Infection Response Gene
C49G7.8	WBGene00016786	cyp-35A4	cyp-35A4 encodes one of over 80 C. elegans cytochrome P450s, Concise description: cyp-35A4 encodes one of over 80 C. elegans cytochrome P450s, NADPH-dependent monooxygenases that metabolize endogenous and exogenous compounds; loss of cyp-35A/C gene family activity in the presence of xenobiotics can diminish the reproductive decline seen in wild-type worms treated with the same compounds;	CYtochrome P450 family
C49G9.1	WBGene00008216	mec-19	none available	MEChanosensory abnormality
C49G9.2	WBGene00045474	C49G9.2	none available	not known
C49H3.12	WBGene00016795	C49H3.12	none available	not known
C49H3.16	WBGene00219436	C49H3.16	none available	not known
C49H3.6	WBGene00016792	C49H3.6	none available	not known
C49H3.9	WBGene00016794	C49H3.9	none available	not known
C50A2.3	WBGene00016797	C50A2.3	none available	not known
C50B6.2	WBGene00008218	nasp-2	none available	NASP (human Nuclear Autoantigenic Sperm Protein) homolog
C50B6.4	WBGene00000734	col-161	none available	COLlagen
C50B6.6	WBGene00005240	srh-15	none available	Serpentine Receptor, class H
C50B6.8	WBGene00008221	nhr-168	none available	Nuclear Hormone Receptor family
C50B6.9	WBGene00008222	C50B6.9	none available	not known
C50B8.4	WBGene00008226	C50B8.4	none available	not known
C50C3.1	WBGene00016799	C50C3.1	none available	not known
C50C3.5	WBGene00016801	C50C3.5	none available	not known
C50C3.6	WBGene00004187	prp-8	prp-8 is orthologous to the human gene SIMILAR TO U5 SNRNP-SPECIFIC Concise description: prp-8 is orthologous to the human gene SIMILAR TO U5 SNRNP-SPECIFIC	yeast PRP (splicing factor) related
C50C3.8	WBGene00016803	bath-42	bath-42 encodes a BTB (broad-complex, Tramtrack, and bric-a-brac) Concise description: bath-42 encodes a BTB (broad-complex, Tramtrack, and bric-a-brac) and MATH (meprin-associated Traf homology) domain-containing protein; loss of bath-42 function results in increased levels of the RIC-3 nicotinic acetylcholine receptor (nAChR)-specific chaperone in vulval muscles and decreased egg-laying in resp…	BTB and MATH domain containing
C50D2.1	WBGene00016805	C50D2.1	none available	not known
C50D2.3	WBGene00016807	C50D2.3	none available	not known
C50D2.4	WBGene00000644	col-68	none available	COLlagen
C50E10.1	WBGene00016825	C50E10.1	none available	not known
C50E10.4	WBGene00004945	sop-2	sop-2 encodes a SAM domain-containing protein that is related Concise description: sop-2 encodes a SAM domain-containing protein that is related to, but not orthologous with, Polycomb group proteins and ETS transcription factors; during development, SOP-2 activity is required for the proper integration of sexual, spatial, and temporal information during cell fate specification; specifically, SOP-…	Suppressor of Pal-1
C50E3.12	WBGene00016823	C50E3.12	none available	not known
C50E3.13	WBGene00016824	C50E3.13	none available	not known
C50F2.10	WBGene00000013	abf-2	abf-2 encodes an antimicrobial peptide homologous to Ascaris Concise description: abf-2 encodes an antimicrobial peptide homologous to Ascaris suum antibacterial factor ASABF, and closely related to ABF-1; recombinant ABF-2 displays strong microbicidal activity against Gram-negative and Gram-positive bacteria, as well as fungi; on account of ABF-2's antimicrobial activity, sequence similarity, an…	AntiBacterial Factor related
C50F2.3	WBGene00016837	syf-1	none available	SYF pre-mRNA splicing factor homolog
C50F2.6	WBGene00001430	fkb-5	fkb-5 encodes a peptidyl-prolyl cis-trans isomerase (PPIase) Concise description: fkb-5 encodes a peptidyl-prolyl cis-trans isomerase (PPIase) that is one of eight FK506 binding proteins encoded by the C. elegans genome; although fkb-5 single mutants show no obvious defects, animals doubly and triply mutant for fkb-5 and other FKB secretory pathway mutants display synthetic, cold-sensitive body m…	FK506-Binding protein family
C50F2.8	WBGene00016841	magu-3	none available	MAGUK family
C50F2.9	WBGene00000012	abf-1	The abf-1 gene encodes a homolog of the antibacterial factor Concise description: The abf-1 gene encodes a homolog of the antibacterial factor	AntiBacterial Factor related
C50F4.1	WBGene00008229	C50F4.1	none available	not known
C50F4.10	WBGene00008235	C50F4.10	none available	not known
C50F4.12	WBGene00008236	C50F4.12	none available	not known
C50F4.3	WBGene00008231	tag-329	none available	Temporarily Assigned Gene name
C50F4.6	WBGene00001910	C50F4.6	his-36 encodes an UNSPECIFIED histone.	not known
C50F4.8	WBGene00008233	C50F4.8	none available	not known
C50F4.9	WBGene00008234	C50F4.9	none available	not known
C50F7.10	WBGene00016848	klo-1	klo-1 encodes a homolog of the human beta-glucosidase-like Concise description: klo-1 encodes a homolog of the human beta-glucosidase-like proteins KL (klotho; OMIM:604824, variant in coronary artery disease), KLB (beta-klotho; OMIM:611135), GBA3 (cytosolic beta-glucosidase; OMIM:606619), LCT (lactase-phlorizin hydrolase; OMIM:603202, variant in adult lactose tolerance), and LCTL (lactase-like pr…	KLOtho (mammalian aging-associated protein) homolog
C50F7.2	WBGene00000551	clx-1	clx-1 encodes a protein that contains 23 copies of a 15 amino Concise description: clx-1 encodes a protein that contains 23 copies of a 15 amino acid repeat, possibly derived from a collagen triplet; there is no transcript evidence	CoLlagen sequence X-hybridizing
C50F7.5	WBGene00016845	C50F7.5	none available	not known
C50H11.1	WBGene00016849	acs-21	none available	fatty Acid CoA Synthetase family
C50H11.15	WBGene00016860	cyp-33C9	none available	CYtochrome P450 family
C50H11.17	WBGene00016861	C50H11.17	none available	not known
C50H11.8	WBGene00016855	C50H11.8	none available	not known
C50H2.1	WBGene00008239	fshr-1	fshr-1 encodes a putative neuropeptide receptor required for Concise description: fshr-1 encodes a putative neuropeptide receptor required for normal acetylcholine secretion by synapses; FSHR-1 is orthologous to human follicle-stimulating hormone receptor (OMIM:136435; mutated in ovarian dysgenesis), thyrotropin receptor (OMIM:603372; mutated in hyperthyroidism), and luteinizing hormone receptor …	FSHR (mammalian follicle stimulating hormone receptor) homolog
C50H2.10	WBGene00008244	fipr-11	none available	FIP (Fungus-Induced Protein) Related
C50H2.12	WBGene00008245	fipr-10	none available	FIP (Fungus-Induced Protein) Related
C50H2.13	WBGene00008246	C50H2.13	none available	not known
C50H2.3	WBGene00003173	mec-9	mec-9 encodes a predicted extracellular protein containing Concise description: mec-9 encodes a predicted extracellular protein containing six EGF-like repeats,five Kunitz-type protease inhibitor domains, and a glutamic acid-rich region possibly involved in protein-protein interactions; mec-9 encodes two proteins, only one of which, MEC-9L, appears to be required for normal mechanosensory respons…	MEChanosensory abnormality
C50H2.4	WBGene00008240	C50H2.4	none available	not known
C51E3.2	WBGene00008248	srsx-27	none available	Serpentine Receptor, class SX
C51E3.7	WBGene00001172	egl-3	The egl-3 gene encodes a homolog of a mammalian proprotein Concise description: The egl-3 gene encodes a homolog of a mammalian proprotein	EGg Laying defective
C52A10.1	WBGene00016862	C52A10.1	none available	not known
C52A10.2	WBGene00016863	C52A10.2	none available	not known
C52A10.3	WBGene00016864	C52A10.3	none available	not known
C52A11.2	WBGene00008256	glb-12	glb-12 encodes a globin; glb-12 transcription is higher in Concise description: glb-12 encodes a globin; glb-12 transcription is higher in L3 and dauers than in young adults; in mass RNAi assays, glb-12 is required for embryonic viability, larval growth, and normal body shape, locomotion, and egg	GLoBin related
C52A11.3	WBGene00008257	C52A11.3	C52A11.3 encodes a PDZ domain-containing protein.	not known
C52B11.2	WBGene00016871	inso-1	none available	INSOmniac (Drosophila sleep affecting) homolog
C52B11.5	WBGene00016874	C52B11.5	none available	not known
C52B9.10	WBGene00016869	C52B9.10	none available	not known
C52B9.6	WBGene00006680	twk-28	none available	TWiK family of potassium channels
C52B9.9	WBGene00003179	mec-18	mec-18 encodes a protein similar to firefly luciferase and Concise description: mec-18 encodes a protein similar to firefly luciferase and plant protein 4-coumarate coA ligase; mec-18 is involved in sensory mechanotransduction; genetic interactions with other mec genes suggest that mec-18 may be involved in negative regulation of the degenerin channel in the touch receptor neurons; mec-18	MEChanosensory abnormality
C52D10.11	WBGene00001460	flp-17	flp-17 encodes a FMRFamide-related neuropeptide; FLP-17 displays Concise description: flp-17 encodes a FMRFamide-related neuropeptide; FLP-17 displays potent excitatory activity on pharyngeal muscle pumping; a flp-17::gfp promoter fusion is expressed in the ciliated BAG neuron and M5 pharyngeal motoneuron, as	FMRF-Like Peptide
C52D10.13	WBGene00000711	col-138	none available	COLlagen
C52D10.3	WBGene00016877	C52D10.3	none available	not known
C52D10.6	WBGene00004818	skr-12	skr-12 encodes a homolog of Skp1 in S. cerevisiae, a core component Concise description: skr-12 encodes a homolog of Skp1 in S. cerevisiae, a core component of the SCF (Skp1p, Cullin, F-box) ubiquitin-ligase complex that facilitates ubiquitin-mediated protein degradation; SKR-12 has no known function in vivo, since skr-12(RNAi) animals	SKp1 Related (ubiquitin ligase complex component)
C52D10.7	WBGene00004815	skr-9	skr-9 encodes a homolog of Skp1 in S. cerevisiae, a component Concise description: skr-9 encodes a homolog of Skp1 in S. cerevisiae, a component of the SCF (Skp1, Cullin, F-box) ubiquitin-ligase complex that regulates ubiquitin-mediated protein degradation; SKR-9 is required for posterior body morphogenesis, embryonic	SKp1 Related (ubiquitin ligase complex component)
C52D10.8	WBGene00004819	skr-13	The skr-13 gene encodes a homolog of Skp1 in S. cerevisiae Concise description: The skr-13 gene encodes a homolog of Skp1 in S. cerevisiae that has no known function in vivo, since skr-13(RNAi) animals are at least superficially	SKp1 Related (ubiquitin ligase complex component)
C52D10.9	WBGene00004814	skr-8	skr-8 encodes a homolog of Skp1 in S. cerevisiae, a component Concise description: skr-8 encodes a homolog of Skp1 in S. cerevisiae, a component of the SCF (Skp1, Cullin, F-box) ubiquitin-ligase complex that regulates ubiquitin-mediated protein degradation; SKR-8 is required for is required for posterior body morphogenesis, embryonic and larval development, and cell proliferation; SKR-8 can inter…	SKp1 Related (ubiquitin ligase complex component)
C52E12.1	WBGene00016888	C52E12.1	none available	not known
C52E2.1	WBGene00016880	fbxb-95	This gene encodes a protein containing an F-box, a motif predicted Concise description: This gene encodes a protein containing an F-box, a motif predicted to mediate protein-protein interactions either with homologs of yeast Skp-1p or with other proteins; this gene's encoded protein also contains an FTH/DUF38 motif,	F-box B protein
C52E2.5	WBGene00016884	C52E2.5	none available	not known
C52E2.6	WBGene00016885	fbxb-97	none available	F-box B protein
C52E2.7	WBGene00016886	fbxb-96	none available	F-box B protein
C52E4.1	WBGene00000781	cpr-1	cpr-1 encodes a cysteine protease of the cathepsin B-like cysteine Concise description: cpr-1 encodes a cysteine protease of the cathepsin B-like cysteine protease family; cpr-1 appears to be required for embryogenesis; cpr-1 is specifically expressed in the gut of all stages except the embryo and around developing embryos	Cysteine PRotease related
C52E4.7	WBGene00008259	C52E4.7	C52E4.7 encodes a member of the histidine phosphatase superfamily Concise description: C52E4.7 encodes a member of the histidine phosphatase superfamily orthologous to Bombyx mori ecdysteroid phosphate phosphatase (EPP), human STS1 (OMIM:609201) and human UBASH3A (OMIM:605736); C52E4.7 is also paralogous to C. elegans F09C12.8, F53B6.7, F55A11.11, and T07F12.1; while no explicit prediction has be…	not known
C53A3.4	WBGene00303231	C53A3.4	none available	not known
C53A5.13	WBGene00008270	C53A5.13	none available	not known
C53A5.2	WBGene00008263	C53A5.2	none available	not known
C53A5.3	WBGene00001834	hda-1	The hda-1 gene encodes a histone deacetylase 1, similar to Concise description: The hda-1 gene encodes a histone deacetylase 1, similar to histone deacetylases RPD3 from yeast and fly; maternal and zygotic expression of hda-1 is required for embryonic viability, and zygotic expression of hda-1 is also	Histone DeAcetylase
C53A5.5	WBGene00008265	kcnl-4	none available	KCNN (potassium K ChaNNel, calcium activated)-Like
C53A5.6	WBGene00008266	C53A5.6	none available	not known
C53B4.5	WBGene00000693	col-119	none available	COLlagen
C53B4.8	WBGene00008277	mltn-12	none available	MLt-TeN (mlt-10) related
C53B7.2	WBGene00016893	C53B7.2	C53B7.2 encodes a putative secreted TIL-domain protease inhibitor Concise description: C53B7.2 encodes a putative secreted TIL-domain protease inhibitor paralogous to SWM-1, ISL-1, and the products of 11 other C. elegans genes; C53B7.2 and its relatives are collectively similar to other TIL-domain protease inhibitors from nematodes, insects, and vertebrates; C53B7.2 has no obvious function in mass	not known
C53B7.3	WBGene00016894	C53B7.3	none available	not known
C53B7.5	WBGene00003856	odr-10	odr-10 encodes a seven transmembrane G protein-coupled olfactory Concise description: odr-10 encodes a seven transmembrane G protein-coupled olfactory receptor; ODR-10 activity is required, in the AWA neurons, for the attractive response to low concentrations of diacetyl; ODR-10 is strongly expressed in the cilia of the AWA olfactory neurons and, at low levels, in the CEP neurons; expression of o…	ODoRant response abnormal
C53B7.7	WBGene00016896	nep-4	C53B7.7 encodes a neprilysin; neprilysins are thermolysin-like Concise description: C53B7.7 encodes a neprilysin; neprilysins are thermolysin-like zinc metallopeptidases, found on the outer surface of animal cells, that negatively regulate small signalling peptides (e.g., enkephalin, tachykinin, insulin, and natriuretic	NEPrilysin metallopeptidase family
C53C11.2	WBGene00016900	C53C11.2	none available	not known
C53C11.5	WBGene00044770	C53C11.5	none available	not known
C53C7.1	WBGene00008278	npr-10	none available	NeuroPeptide Receptor family
C53C7.3	WBGene00008279	C53C7.3	none available	not known
C53C7.5	WBGene00014294	C53C7.5	none available	not known
C53C9.2	WBGene00016898	C53C9.2	none available	not known
C53D5.2	WBGene00016903	2019-03-04	none available	MARCH (Membrane-Associated Ring finger (C3HC4)) homolog
C53D5.3	WBGene00016904	C53D5.3	none available	not known
C53D6.10	WBGene00023424	C53D6.10	none available	not known
C53D6.3	WBGene00008280	acc-2	none available	Acetylcholine-gated Chloride Channel
C53D6.4	WBGene00008281	C53D6.4	none available	not known
C53D6.7	WBGene00008284	C53D6.7	none available	not known
C53H9.1	WBGene00004441	rpl-27	rpl-27 encodes a large ribosomal subunit L27 protein.	Ribosomal Protein, Large subunit
C53H9.4	WBGene00303070	C53H9.4	none available	not known
C54A12.4	WBGene00016911	drn-1	none available	Di-Ras/Rig/Noey2 Ras-like protein homolog
C54C6.2	WBGene00000248	ben-1	none available	BENzimidazole resistant
C54C6.5	WBGene00008287	C54C6.5	none available	not known
C54C8.1	WBGene00008289	nhr-169	none available	Nuclear Hormone Receptor family
C54C8.12	WBGene00044242	C54C8.12	none available	not known
C54C8.8	WBGene00014714	C54C8.8	none available	not known
C54C8.9	WBGene00008295	nlp-39	none available	Neuropeptide-Like Protein
C54D1.5	WBGene00016913	lam-2	lam-2 encodes a laminin gamma subunit; lam-2 activity is required Concise description: lam-2 encodes a laminin gamma subunit; lam-2 activity is required for embryonic development and for regulation of muscle arm extension; loss of lam-2 function via large-scale RNAi screens results in embryonic, larval, and adult lethality,	LAMinin related. See also lmb-
C54D10.1	WBGene00008296	cdr-2	cdr-2 encodes a predicted transmembrane protein that is a member Concise description: cdr-2 encodes a predicted transmembrane protein that is a member of the CDR (cadmium responsive) family of proteins; cdr-2 expression is increased upon exposure to cadmium ions, and loss of cdr-2 activity results in increased sensitivity	CaDmium Responsive
C54D10.3	WBGene00008298	C54D10.3	none available	not known
C54D10.5	WBGene00008300	C54D10.5	none available	not known
C54D10.7	WBGene00008301	pals-39	none available	Protein containing ALS2cr12 (ALS2CR12) signature
C54D2.1	WBGene00016915	C54D2.1	none available	not known
C54D2.2	WBGene00016916	C54D2.2	none available	not known
C54D2.4	WBGene00006310	sul-3	sul-3 is orthologous to the human gene ARYLSULFATASE B (ARSB; Concise description: sul-3 is orthologous to the human gene ARYLSULFATASE B (ARSB;	SULfatase domain protein
C54E10.11	WBGene00206524	C54E10.11	none available	not known
C54E10.5	WBGene00008309	nhr-170	none available	Nuclear Hormone Receptor family
C54E4.1	WBGene00016917	C54E4.1	none available	not known
C54E4.12	WBGene00235274	C54E4.12	none available	not known
C54E4.2	WBGene00016918	test-1	none available	vertebrate proteoglycan TESTican homolog
C54E4.3	WBGene00001557	gcy-37	gcy-37 encodes a predicted soluble guanylyl cyclase that is Concise description: gcy-37 encodes a predicted soluble guanylyl cyclase that is expressed in four candidate sensory neurons connected to the pseudocoelom, URXL, URXR, AQR, and PQR; as loss of gcy-37 activity via RNA-mediated interference does not result in any abnormalities, the precise role of GCY-37 in C. elegans development and/or be…	Guanylyl CYclase
C54F6.11	WBGene00016928	srb-19	none available	Serpentine Receptor, class B (beta)
C54F6.12	WBGene00016929	C54F6.12	none available	not known
C54F6.14	WBGene00001500	ftn-1	ftn-1 encodes one of two C. elegans ferritin heavy chain homologs; Concise description: ftn-1 encodes one of two C. elegans ferritin heavy chain homologs; ftn-1 activity is essential for normal lifespan under iron stress conditions and, in addition, has been reported to be essential for embryogenesis; an ftn-1::gfp reporter is expressed in the intestine at all stages of development and its expres…	FerriTiN
C54F6.20	WBGene00271796	C54F6.20	none available	not known
C54F6.4	WBGene00016922	swt-2	none available	SWEET sugar transporter family
C54F6.6	WBGene00016924	C54F6.6	none available	not known
C54F6.9	WBGene00016927	nhr-172	none available	Nuclear Hormone Receptor family
C54G10.2	WBGene00004337	rfc-1	none available	RFC (DNA replication factor) family
C54G4.2	WBGene00008312	C54G4.2	none available	not known
C54G4.3	WBGene00008313	C54G4.3	none available	not known
C54G4.4	WBGene00008314	C54G4.4	none available	not known
C54G4.5	WBGene00008315	C54G4.5	none available	not known
C54G4.9	WBGene00008318	C54G4.9	none available	not known
C54G6.1	WBGene00016930	madf-6	none available	MADF domain transcription factor
C54G6.5	WBGene00005002	spp-17	none available	SaPosin-like Protein family
C54G7.3	WBGene00002983	lgx-1	lgx-1 encodes a polysaccharide deacetylase.	Lin-12 and Glp-1 X-hybridizing
C54G7.4	WBGene00016935	ifta-1	ifta-1 encodes a evolutionarily conserved protein found in Concise description: ifta-1 encodes a evolutionarily conserved protein found in ciliated unicellular and multicellular organisms including humans and is absent in non-ciliated organisms like yeast; IFTA-1 contains a X-box and several N-terminal WD repeats; ifta-1 is required for retrograde intraflagellar transport and likely associates wi…	IntraFlagellar Transport Associated
C54H2.3	WBGene00016937	tag-294	none available	Temporarily Assigned Gene name
C55A1.6	WBGene00008323	C55A1.6	none available	not known
C55A6.1	WBGene00008330	C55A6.1	none available	not known
C55A6.3	WBGene00008332	C55A6.3	none available	not known
C55A6.4	WBGene00008333	C55A6.4	none available	not known
C55A6.6	WBGene00008335	C55A6.6	none available	not known
C55A6.9	WBGene00008338	pafo-1	pafo-1 encodes the C. elegans ortholog of mammalian and Saccharomyces Concise description: pafo-1 encodes the C. elegans ortholog of mammalian and Saccharomyces cerevisiae PAF1 that is a member of the PAF1 (Polymerase-Associated Factor 1) complex;	PAF1 (One) homolog, a component of the PAF1 complex that Gene class description: PAF1 (One) homolog, a component of the PAF1 complex that
C55B6.1	WBGene00016939	C55B6.1	none available	not known
C55B6.2	WBGene00001025	dnj-7	dnj-7 encodes a protein containing a DnaJ domain that is orthologous Concise description: dnj-7 encodes a protein containing a DnaJ domain that is orthologous to vertebrate P58IPK/DNAJC3, peripheral membrane proteins of the rough endoplasmic reticulum (ER) that function in co-translocational ER protein degradation during ER stress; in C. elegans, loss of dnj-7 activity via RNAi results in increas…	DNaJ domain (prokaryotic heat shock protein)
C55B7.10	WBGene00016946	C55B7.10	none available	not known
C55B7.9	WBGene00007018	mdt-18	none available	MeDiaTor
C55C2.1	WBGene00016948	scrt-1	none available	SCRaTch (zinc finger transcriptional repressor) homolog
C55C3.1	WBGene00016951	C55C3.1	none available	not known
C55C3.6	WBGene00016956	C55C3.6	none available	not known
C55F2.1	WBGene00016957	atic-1	none available	5-Aminoimidazole-4-carboxamide ribonucleotide formylTransferase/IMP Gene class description: 5-Aminoimidazole-4-carboxamide ribonucleotide formylTransferase/IMP
C56A3.1	WBGene00001726	grl-17	grl-17 encodes a hedgehog-like protein, with an N-terminal Concise description: grl-17 encodes a hedgehog-like protein, with an N-terminal signal sequence, a central proline-rich low-complexity region, and a C-terminal Ground-like (Grl) domain; GRL-17 is expressed in pharynx, rectal epithelium, amphid socket cells, larval arcade cells, and larval hypodermis; the Grl domain is predicted to form a …	GRound-Like (grd related)
C56A3.10	WBGene00077568	C56A3.10	none available	not known
C56A3.2	WBGene00008341	ttr-44	none available	TransThyretin-Related family domain
C56A3.3	WBGene00008342	frpr-5	C56A3.3 encodes a homolog of the functionally active Fmrf Receptor Concise description: C56A3.3 encodes a homolog of the functionally active Fmrf Receptor (FR; CG2114) of D. melanogaster; it is thus possible that C56A3.3 is a receptor	FMRFamide Peptide Receptor family
C56A3.9	WBGene00044800	C56A3.9	none available	not known
C56C10.1	WBGene00016960	vps-33.2	none available	related to yeast Vacuolar Protein Sorting factor
C56C10.4	WBGene00016962	C56C10.4	none available	not known
C56E6.3	WBGene00016971	toe-2	none available	Target Of ERK kinase MPK-1
C56G2.15	WBGene00016983	C56G2.15	none available	not known
C56G2.22	WBGene00303050	C56G2.22	none available	not known
C56G2.3	WBGene00016978	C56G2.3	none available	not known
C56G2.5	WBGene00016980	C56G2.5	none available	not known
C56G2.9	WBGene00016982	C56G2.9	none available	not known
CC4.2	WBGene00003753	nlp-15	none available	Neuropeptide-Like Protein
CC4.3	WBGene00004895	smu-1	smu-1 encodes a highly conserved WD40 repeat-containing protein Concise description: smu-1 encodes a highly conserved WD40 repeat-containing protein that is orthologous to the vertebrate and plant SMU proteins and S. cerevisiae Pfs2p; SMU-1 activity is required, along with that of SMU-2, for regulation of splice site choice in the pre-mRNAs of unc-52 and other genes; SMU-1 physically interacts wi…	Suppressor of Mec and Unc defects
CD4.1	WBGene00016988	CD4.1	none available	not known
CD4.10	WBGene00022970	CD4.10	none available	not known
CD4.7	WBGene00016992	zhit-1	none available	Zinc finger, HIT-type
cTel55X.1	WBGene00007068	cTel55X.1	none available	not known
D1007.18	WBGene00044421	D1007.18	none available	not known
D1007.20	WBGene00045094	D1007.20	none available	not known
D1007.7	WBGene00017004	nrd-1	none available	NRD (yeast Nuclear pre-mRNA Down-regulation) homolog
D1009.2	WBGene00000884	cyn-8	cyn-8 encodes a peptidyl-propyl cis-trans isomerase of the Concise description: cyn-8 encodes a peptidyl-propyl cis-trans isomerase of the cyclophilin family; cyclophilins are implicated in protein folding, however the precise role of cyn-8 is not known; a CYN-8-fusion protein localises specifically	CYclophyliN
D1009.4	WBGene00003752	nlp-14	none available	Neuropeptide-Like Protein
D1014.13	WBGene00303233	D1014.13	none available	not known
D1014.5	WBGene00017018	D1014.5	none available	not known
D1022.3	WBGene00017022	D1022.3	none available	not known
D1022.6	WBGene00005641	sro-1	none available	Serpentine Receptor, class O (opsin)
D1022.9	WBGene00044300	D1022.9	none available	not known
D1025.10	WBGene00044134	D1025.10	none available	not known
D1025.3	WBGene00008355	fbxa-141	This gene encodes a protein containing an F-box, a motif predicted Concise description: This gene encodes a protein containing an F-box, a motif predicted to mediate protein-protein interactions either with homologs of yeast Skp-1p or with other proteins; this gene's encoded protein also contains an FTH/DUF38 motif,	F-box A protein
D1025.4	WBGene00008356	nspc-20	none available	Nematode Specific Peptide family, group C
D1025.6	WBGene00008357	nspc-16	none available	Nematode Specific Peptide family, group C
D1025.7	WBGene00008358	nspc-18	none available	Nematode Specific Peptide family, group C
D1025.8	WBGene00008359	nspc-17	none available	Nematode Specific Peptide family, group C
D1025.9	WBGene00008360	nspc-19	none available	Nematode Specific Peptide family, group C
D1037.2	WBGene00004890	smp-2	none available	SeMaPhorin related
D1044.1	WBGene00017027	D1044.1	none available	not known
D1044.2	WBGene00017028	dex-1	dex-1 encodes a single-pass transmembrane protein with a domain Concise description: dex-1 encodes a single-pass transmembrane protein with a domain similar to zonaadhesion, a sperm protein that binds the ZP matrix, dex-1 is also predicted to include two domains similar to nidogens, a family of proteins found in especially neural basement membrane; dex-1 share a domain composition with alpha and …	Dendrite EXtension defective
D1044.3	WBGene00004114	pqn-25	The protein product of this gene is predicted to contain a Concise description: The protein product of this gene is predicted to contain a glutamine/asparagine (Q/N)-rich ('prion') domain, by the algorithm of Michelitsch	Prion-like-(Q/N-rich)-domain-bearing protein
D1044.7	WBGene00017032	D1044.7	none available	not known
D1046.1	WBGene00008362	cfim-2	D1046.1 encodes a putative cleavage and polyadenylation specificity Concise description: D1046.1 encodes a putative cleavage and polyadenylation specificity factor, orthologous to human CPSF6 (OMIM:604979) and CPSF7, that is required for normal locomotion and fertility; D1046.1 is expressed in many, if not all, somatic tissues of larvae and adults; D1046.1(RNAi) has no obvious synthetic phenotype	Cleavage Factor IM (CFIm) homolog
D1046.5	WBGene00008366	tpra-1	none available	TPRA-1 (human TRansmembrane Protein, Adipocyte associated Gene class description: TPRA-1 (human TRansmembrane Protein, Adipocyte associated
D1053.3	WBGene00008368	D1053.3	none available	not known
D1054.10	WBGene00008377	D1054.10	none available	not known
D1054.11	WBGene00008378	ule-3	none available	Uterine Lumin Expressed/locailized
D1054.12	WBGene00005399	srh-184	none available	Serpentine Receptor, class H
D1054.14	WBGene00008380	prp-38	none available	yeast PRP (splicing factor) related
D1054.17	WBGene00023430	D1054.17	none available	not known
D1054.18	WBGene00077783	D1054.18	none available	not known
D1054.19	WBGene00194677	D1054.19	none available	not known
D1054.5	WBGene00008372	D1054.5	none available	not known
D1054.9	WBGene00008376	D1054.9	none available	not known
D1065.6	WBGene00268212	D1065.6	none available	not known
D1065.7	WBGene00269427	D1065.7	none available	not known
D1069.1	WBGene00017036	D1069.1	none available	not known
D1069.2	WBGene00000778	cpn-2	cpn-2 encodes a calponin homolog, more similar to the calponin Concise description: cpn-2 encodes a calponin homolog, more similar to the calponin	CalPoNin
D1073.1	WBGene00017039	trk-1	trk-1 encodes a receptor tyrosine kinase that is most closely Concise description: trk-1 encodes a receptor tyrosine kinase that is most closely	TRK (vertebrate neurotrophin receptor tyrosine kinase) homolog
D1079.1	WBGene00017040	D1079.1	none available	not known
D1081.12	WBGene00086554	D1081.12	none available	not known
D1081.5	WBGene00008383	D1081.5	none available	not known
D1081.6	WBGene00008384	D1081.6	none available	not known
D1081.7	WBGene00008385	D1081.7	none available	not known
D1086.1	WBGene00008388	D1086.1	none available	not known
D1086.10	WBGene00044080	D1086.10	none available	not known
D1086.11	WBGene00044081	D1086.11	none available	not known
D1086.17	WBGene00045355	D1086.17	none available	not known
D1086.18	WBGene00045405	D1086.18	none available	not known
D1086.2	WBGene00008389	D1086.2	none available	not known
D1086.3	WBGene00008390	D1086.3	none available	not known
D1086.5	WBGene00008392	D1086.5	none available	not known
D1086.6	WBGene00008393	D1086.6	none available	not known
D1086.7	WBGene00008394	D1086.7	none available	not known
D1086.8	WBGene00008395	D1086.8	none available	not known
D1086.9	WBGene00008396	D1086.9	none available	not known
D2005.2	WBGene00003746	nlp-8	none available	Neuropeptide-Like Protein
D2005.6	WBGene00008401	D2005.6	none available	not known
D2005.7	WBGene00086551	D2005.7	none available	not known
D2013.10	WBGene00006520	tag-175	tag-175 encodes an ortholog of human TMEM41B, whose protein Concise description: tag-175 encodes an ortholog of human TMEM41B, whose protein family is ancient (conserved in both animals and plants) but functionally uncharacterized; TAG-175 is broadly expressed (in hypodermis, muscle, neurons, intestine, spermetheca, and vulva); TAG-175 has no known function in vivo, since neither tag-175(RNAi)	Temporarily Assigned Gene name
D2013.3	WBGene00008403	csa-1	none available	Cockayne Syndrome complementation group A homolog
D2021.1	WBGene00017046	utx-1	utx-1 encodes a putative histone H3 di/trimethyllysine-27 (H3K27me2/me3) Concise description: utx-1 encodes a putative histone H3 di/trimethyllysine-27 (H3K27me2/me3) demethylase, required for embryonic viability and vulval development, and for high brood sizes, locomotion, and growth sizes; UTX-1 contains a JmjC domain, is orthologous to human UTX and UTY, and is paralogous to human JMJD3; by or…	human UTX (Ubiquitously transcribed TPR on X) homolog
D2023.12	WBGene00196059	D2023.12	none available	not known
D2023.7	WBGene00000731	col-158	none available	COLlagen
D2024.10	WBGene00044505	D2024.10	none available	not known
D2024.4	WBGene00017052	D2024.4	none available	not known
D2024.7	WBGene00017054	gstk-2	gstk-2 encodes one of two C. elegans kappa class glutathione Concise description: gstk-2 encodes one of two C. elegans kappa class glutathione transferases; while gstk-2(RNAi) animals exhibit no obvious developmental or morphological abnormalities, animals doubly mutant for gstk-2 and gstk-1 exhibit decreased respiration and a lower concentration of the monounsaturated fatty acid cis-vaccenic aci…	Glutathione S-Transferase Kappa protein
D2024.8	WBGene00000688	col-114	none available	COLlagen
D2030.1	WBGene00008411	mans-1	mans-1 is an ortholog of human MAN1A1 (mannosidase, alpha1A, Concise description: mans-1 is an ortholog of human MAN1A1 (mannosidase, alpha1A, member 1), MAN1C1 (mannosidase, alpha1C, member 1) and MAN1A2 (mannosidase, alpha1A, member 2); mans-1 is involved in determination of adult lifespan; mans-1 has a calcium ion dependent mannosyl-oligosaccharide 1,2-alpha-mannosidase activity, based on	MAnnoSidase (family 47 glycohydrolase)
D2030.10	WBGene00000084	aex-1	aex-1 encodes a novel, C2 calcium-binding domain protein that Concise description: aex-1 encodes a novel, C2 calcium-binding domain protein that is similar to human BAP3 proteins and rat Munc13; in C. elegans, AEX-1 functions in retrograde signaling to regulate presynaptic activity and localization of the synaptic vesicle fusion protein UNC-13; AEX-1 is required for the defecation motor program, …	ABoc, EXpulsion (defecation) defective
D2030.7	WBGene00008417	D2030.7	none available	not known
D2030.8	WBGene00008418	D2030.8	none available	not known
D2045.5	WBGene00008423	D2045.5	none available	not known
D2045.6	WBGene00000836	cul-1	cul-1 encodes a cullin, orthologous to Cdc53/Cul1 in S. cerevisiae Concise description: cul-1 encodes a cullin, orthologous to Cdc53/Cul1 in S. cerevisiae and CUL-1 in humans (OMIM:603134), that is required both maternally and zygotically for developmentally programmed transitions from the G1 phase of the cell cycle to the GO phase or the apoptotic pathway, and that is probably also required for …	CULlin
D2045.7	WBGene00008424	D2045.7	none available	not known
D2045.9	WBGene00008426	D2045.9	none available	not known
D2062.1	WBGene00017055	D2062.1	none available	not known
D2062.14	WBGene00219667	linc-66	none available	Long Intervening Non-Coding RNA
D2062.4	WBGene00017056	D2062.4	none available	not known
D2062.6	WBGene00017058	msrp-6	none available	MS Related Protein
D2063.1	WBGene00017060	D2063.1	none available	not known
D2063.4	WBGene00044529	irld-1	none available	Insulin/EGF-Receptor L Domain protein
D2085.3	WBGene00008428	eif-2Bepsilon	D2085.3 encodes the C. elegans ortholog of the epsilon subunit Concise description: D2085.3 encodes the C. elegans ortholog of the epsilon subunit	Eukaryotic Initiation Factor
D2089.2	WBGene00008433	2019-03-02	none available	MARCH (Membrane-Associated Ring finger (C3HC4)) homolog
D2089.5	WBGene00001522	gbh-1	gbh-1 encodes a predicted ortholog of human hBBOX1; expressed Concise description: gbh-1 encodes a predicted ortholog of human hBBOX1; expressed	Gamma Butyrobetaine Hydroxylase
D2092.1	WBGene00017063	mctp-1	none available	Multiple C2 and Transmembrane region Protein family homolog
D2092.2	WBGene00017064	ppfr-2	none available	Protein Phosphatase Four Regulatory subunit
D2092.3	WBGene00000050	acr-11	A homolog of an alpha type nicotinic acetylcholine receptor Concise description: A homolog of an alpha type nicotinic acetylcholine receptor subunit involved in the mediation of fast synaptic transmission at neuromuscular	AcetylCholine Receptor
D2096.10	WBGene00017077	D2096.10	none available	not known
D2096.16	WBGene00235276	D2096.16	none available	not known
D2096.3	WBGene00017071	aagr-1	none available	Acid Alpha Glucosidase Relate
D2096.5	WBGene00017072	D2096.5	none available	not known
D2096.6	WBGene00017073	D2096.6	none available	not known
D2096.9	WBGene00017076	D2096.9	none available	not known
DC2.7	WBGene00017083	kin-33	none available	protein KINase
DH11.3	WBGene00004005	pgp-11	pgp-11 encodes an ATP-binding protein that is a member of the Concise description: pgp-11 encodes an ATP-binding protein that is a member of the P-glycoprotein subclass of the ATP-binding cassette (ABC) transporter superfamily; pgp-11 is predicted to function as a transmembrane protein that couples energy to transport of various molecules across membranes; RNAi experiments indicate that pgp-11 is…	P-GlycoProtein related
DY3.3	WBGene00001960	hlh-16	none available	Helix Loop Helix
DY3.5	WBGene00004115	pqn-26	The protein product of this gene is predicted to contain a Concise description: The protein product of this gene is predicted to contain a glutamine/asparagine (Q/N)-rich ('prion') domain, by the algorithm of Michelitsch	Prion-like-(Q/N-rich)-domain-bearing protein
DY3.7	WBGene00006324	sup-17	sup-17 encodes an ADAM protein, an integral membrane disintegrin Concise description: sup-17 encodes an ADAM protein, an integral membrane disintegrin and zinc-activated metalloproteinase, orthologous to Drosophila and mouse KUZBANIAN and the vertebrate ADAM10 proteins; SUP-17 is required maternally for embryonic development and plays a role in LIN-12/Notch-mediated cell signaling required for se…	SUPpressor
DY3.8	WBGene00008440	DY3.8	none available	not known
E01A2.10	WBGene00077701	poml-3	none available	PON (paraoxonase) and MEC-6 Like
E01A2.2	WBGene00017085	E01A2.2	none available	not known
E01A2.6	WBGene00017088	akir-1	none available	AKIRin (conserved nuclear protein family) homolog
E01A2.8	WBGene00017090	E01A2.8	The E01A2.8 gene encodes one of five paraoxonase-like proteins; Concise description: The E01A2.8 gene encodes one of five paraoxonase-like proteins; it is homologous to the human PARAOXONASE 1 gene (PON1, OMIM:168820), which in some	not known
E01F3.1	WBGene00008443	pde-3	none available	PhosphoDiEsterase
E01G4.4	WBGene00004116	pqn-27	The protein product of this gene is predicted to contain a Concise description: The protein product of this gene is predicted to contain a glutamine/asparagine (Q/N)-rich ('prion') domain, by the algorithm of Michelitsch	Prion-like-(Q/N-rich)-domain-bearing protein
E01G4.6	WBGene00008448	E01G4.6	none available	not known
E01G6.1	WBGene00008449	E01G6.1	none available	not known
E01H11.3	WBGene00001463	flp-20	flp-20 encodes two copies of a single FMRFamide-related short Concise description: flp-20 encodes two copies of a single FMRFamide-related short peptide neurotransmitter; the precise role of this peptide in C. elegans neurotransmission	FMRF-Like Peptide
E02A10.2	WBGene00001732	grl-23	grl-23 encodes a hedgehog-like protein, with (from N- to C-terminus) Concise description: grl-23 encodes a hedgehog-like protein, with (from N- to C-terminus) a signal sequence, a glycine-rich low-complexity region, a Ground-like (Grl) domain, and an acid-rich low-complexity region; the Grl domain is predicted to form a cysteine-crosslinked protein involved in intercellular signalling, and it has…	GRound-Like (grd related)
E02A10.4	WBGene00008454	E02A10.4	none available	not known
E02C12.13	WBGene00023485	ttr-49	none available	TransThyretin-Related family domain
E02D9.1	WBGene00017098	E02D9.1	none available	not known
E02H1.6	WBGene00008458	E02H1.6	E02H1.6 encodes an ortholog of human TAF9 (OMIM:600822; also Concise description: E02H1.6 encodes an ortholog of human TAF9 (OMIM:600822; also known as AK6, adrenal gland protein AD-004 like protein, ADLP) and of S. cerevisiae Fap7p; like its human ortholog, E02H1.6 is nuclear, and is predicted to likewise be a TATA box binding protein (TBP)-associated factor mediating activation of RNA polymeras…	not known
E02H1.7	WBGene00003618	nhr-19	none available	Nuclear Hormone Receptor family
E02H4.6	WBGene00008464	E02H4.6	none available	not known
E02H4.7	WBGene00077757	E02H4.7	none available	not known
E02H9.1	WBGene00017099	E02H9.1	none available	not known
E02H9.10	WBGene00219669	anr-28	none available	Antisense Non-coding RNA
E02H9.11	WBGene00219670	anr-26	none available	Antisense Non-coding RNA
E02H9.5	WBGene00017103	klo-2	klo-2 encodes a homolog of the human beta-glucosidase-like Concise description: klo-2 encodes a homolog of the human beta-glucosidase-like proteins KL (klotho; OMIM:604824), KLB (beta-klotho; OMIM:611135), GBA3 (cytosolic beta-glucosidase; OMIM:606619), LCT (lactase-phlorizin hydrolase; OMIM:603202, variant in adult lactose tolerance), and LCTL (lactase-like protein); KLO-2 has 76% identity (364/…	KLOtho (mammalian aging-associated protein) homolog
E03A3.10	WBGene00189944	E03A3.10	none available	not known
E03A3.4	WBGene00001944	his-70	his-70 encodes an H3 histone.	HIStone
E03D2.1	WBGene00003751	nlp-13	nlp-13 encodes a predicted neuropeptide of the MSFamide family; Concise description: nlp-13 encodes a predicted neuropeptide of the MSFamide family; expressed primarily in neurons or in the endocrine/secretory cells, and expression	Neuropeptide-Like Protein
E03D2.2	WBGene00003747	nlp-9	none available	Neuropeptide-Like Protein
E03H12.5	WBGene00017112	E03H12.5	none available	not known
E03H12.7	WBGene00017114	E03H12.7	none available	not known
E04A4.1	WBGene00017116	fbxb-78	This gene encodes a protein containing an F-box, a motif predicted Concise description: This gene encodes a protein containing an F-box, a motif predicted to mediate protein-protein interactions either with homologs of yeast Skp-1p or with other proteins; its encoded protein also contains a Pfam-B45 motif of presently	F-box B protein
E04A4.2	WBGene00017117	fbxb-80	none available	F-box B protein
E04A4.6	WBGene00017120	tctn-1	none available	TeCToNic (vertebrate ciliogenesis factor) homolog
E04D5.2	WBGene00008481	E04D5.2	none available	not known
E04D5.4	WBGene00008483	E04D5.4	none available	not known
E04F6.10	WBGene00017129	E04F6.10	none available	not known
E04F6.15	WBGene00017131	E04F6.15	none available	not known
E04F6.2	WBGene00017122	pcrg-1	none available	Parkin Co-Regulated Gene (PACRG) homolog
E04F6.3	WBGene00017123	maoc-1	maoc-1 encodes an ortholog of human HSD17B4 (OMIM:601860, mutated Concise description: maoc-1 encodes an ortholog of human HSD17B4 (OMIM:601860, mutated in D-bifunctional protein deficiency); MAOC-1 contains a MaoC-like domain found in diverse enzymes (HSD17B4, peroxisomal hydratase-dehydrogenase-epimerase, and the fatty acid synthase beta subunit) and by homology, is predicted to function in per…	MAO-C-like dehydratase domain
E04F6.4	WBGene00017124	E04F6.4	none available	not known
E04F6.6	WBGene00017126	E04F6.6	none available	not known
E04F6.7	WBGene00000971	dhs-7	none available	DeHydrogenases, Short chain
E04F6.8	WBGene00017127	E04F6.8	none available	not known
E04F6.9	WBGene00017128	E04F6.9	none available	not known
EEED8.1	WBGene00017132	tofu-6	none available	Twenty One u-rna (21U-RNA) biogenesis Fouled Up
EEED8.12	WBGene00017140	EEED8.12	none available	not known
EEED8.15	WBGene00017143	EEED8.15	none available	not known
EEED8.2	WBGene00017133	EEED8.2	none available	not known
EEED8.3	WBGene00017134	EEED8.3	EEED8.3 encodes a protein with similarity to fatty acid-binding Concise description: EEED8.3 encodes a protein with similarity to fatty acid-binding	not known
EEED8.4	WBGene00017135	EEED8.4	none available	not known
EEED8.5	WBGene00003393	mog-5	none available	Masculinisation Of Germline
EEED8.7	WBGene00004701	rsp-4	rsp-4 encodes, along with rsp-5, one of two C. elegans orthologs Concise description: rsp-4 encodes, along with rsp-5, one of two C. elegans orthologs of the vertebrate SC35 splicing factor and member of the SR protein family of nuclear phosphoproteins that are required for constitutive splicing and influence alternative	SR Protein (splicing factor)
EGAP1.3	WBGene00006987	zmp-1	zmp-1 encodes a zinc matrix metalloproteinase that enables Concise description: zmp-1 encodes a zinc matrix metalloproteinase that enables anchor cell (AC) invasion during postembryonic vulval development; ZMP-1's proteinase activity has been confirmed in vitro; N-terminus to C-terminus, ZMP-1 is predicted to have a signal sequence, peptidoglycan-binding domain, a central matrix protease domain, …	Zinc MetalloProtease
EGAP2.1	WBGene00017147	EGAP2.1	none available	not known
EGAP4.1	WBGene00017149	EGAP4.1	none available	not known
EGAP7.1	WBGene00001065	dpy-3	none available	DumPY: shorter than wild-type
EGAP9.3	WBGene00017151	EGAP9.3	none available	not known
EGAP9.4	WBGene00044545	EGAP9.4	none available	not known
F01D4.4	WBGene00001189	egl-21	egl-21 encodes a putative carboxypeptidase (whose homologs Concise description: egl-21 encodes a putative carboxypeptidase (whose homologs include human enkephalin convertase/carboxypeptidase E); EGL-21 is expressed throughout the nervous system; EGL-21 is required for normal synthesis of FMRFamide-like (FLP) and neuropeptide-like (NLP) peptides, and for normal egg-laying, locomotion, and defecat…	EGg Laying defective
F01D4.5	WBGene00008488	F01D4.5	none available	not known
F01D5.1	WBGene00008492	F01D5.1	none available	not known
F01D5.10	WBGene00008500	F01D5.10	none available	not known
F01D5.2	WBGene00008493	F01D5.2	none available	not known
F01D5.5	WBGene00008495	F01D5.5	none available	not known
F01D5.6	WBGene00008496	F01D5.6	none available	not known
F01D5.7	WBGene00008497	F01D5.7	none available	not known
F01E11.1	WBGene00017154	ugt-57	none available	UDP-GlucuronosylTransferase
F01E11.18	WBGene00219373	F01E11.18	none available	not known
F01E11.3	WBGene00017156	F01E11.3	none available	not known
F01F1.11	WBGene00017165	F01F1.11	none available	not known
F01F1.15	WBGene00017169	F01F1.15	none available	not known
F01F1.3	WBGene00017160	F01F1.3	none available	not known
F01G10.9	WBGene00008511	F01G10.9	none available	not known
F01G12.5	WBGene00002280	let-2	let-2 encodes an alpha-2 type IV collagen, probably most closely Concise description: let-2 encodes an alpha-2 type IV collagen, probably most closely equivalent to the human gene COL4A2 (OMIM:120090) on the basis of biological function; LET-2 is required for embryonic development and is a component of the basement membrane between muscle and hypodermis; LET-2 interacts with UNC-105, a mechanosen…	LEThal
F01G4.1	WBGene00004204	swsn-4	swsn-4 (phasmid socket absent) gene encodes an ortholog of Concise description: swsn-4 (phasmid socket absent) gene encodes an ortholog of SWI2/SNF2, a component of the SWI/SNF complex that is conserved from yeast to mammals and that is involved in chromatin remodeling; swsn-4 is probably required during	SWI/SNF nucleosome remodeling complex component
F02A9.1	WBGene00008513	F02A9.1	none available	not known
F02A9.3	WBGene00001386	far-2	far-2 encodes a protein similar to a class of secreted fatty Concise description: far-2 encodes a protein similar to a class of secreted fatty acid and retinol-binding proteins expressed in parasitic nematodes and secreted in the surrounding tissues of the host; expressed in body wall muscle and vulval cells of adult hermaphrodites, and transcript levels progressively increase during	Fatty Acid/Retinol binding protein
F02A9.6	WBGene00001609	glp-1	glp-1 encodes an N-glycosylated transmembrane protein that, Concise description: glp-1 encodes an N-glycosylated transmembrane protein that, along with LIN-12, comprises one of two C. elegans members of the LIN-12/Notch family of receptors; from the N- to the C-terminus, GLP-1 is characterized by ten extracellular EGF-like repeats, three LIN-12/Notch repeats, a CC-linker, a transmembrane domain, …	abnormal Germ Line Proliferation
F02A9.7	WBGene00044406	F02A9.7	none available	not known
F02C12.1	WBGene00008515	F02C12.1	none available	not known
F02C12.5	WBGene00008519	cyp-13B1	cyp-13B1 encodes one of ~80 C. elegans cytochrome P450s: membrane-associated, Concise description: cyp-13B1 encodes one of ~80 C. elegans cytochrome P450s: membrane-associated, heme-containing NADPH-dependent monooxygenases that catalyze the oxidative metabolism	CYtochrome P450 family
F02C12.8	WBGene00194814	linc-34	none available	Long Intervening Non-Coding RNA
F02C9.4	WBGene00017175	irld-3	none available	Insulin/EGF-Receptor L Domain protein
F02D10.1	WBGene00000756	col-183	none available	COLlagen
F02D10.6	WBGene00008526	F02D10.6	none available	not known
F02D8.2	WBGene00001701	grd-12	grd-12 encodes a hedgehog-like protein, with an N-terminal Concise description: grd-12 encodes a hedgehog-like protein, with an N-terminal signal sequence, a central low-complexity proline-rich domain, and a C-terminal Ground domain; GRD-12 is expressed in intestine, rectal epithelium, undefined head and tail cells, vulva, and hypodermis; the Ground domain is predicted to form a cysteine-crosslin…	GRounDhog (hedgehog-like family)
F02D8.3	WBGene00006960	xbx-1	xbx-1 encodes a dynein light intermediate chain; XBX-1 activity Concise description: xbx-1 encodes a dynein light intermediate chain; XBX-1 activity is required for retrograde intraflagellar transport and thus, for proper formation of sensory neuron cilia; an XBX-1::YFP reporter fusion protein is found at the ciliary base and migrating along the ciliary axoneme in both anterograde and retrograde	X-BoX promoter element regulated
F02D8.5	WBGene00008522	nlp-59	none available	Neuropeptide-Like Protein
F02E11.2	WBGene00017180	F02E11.2	none available	not known
F02E11.5	WBGene00017183	scl-15	none available	SCP-Like extracellular protein
F02E11.7	WBGene00195073	F02E11.7	none available	not known
F02E8.3	WBGene00000157	aps-2	aps-2 encodes an adaptin: specifically, it encodes an ortholog Concise description: aps-2 encodes an adaptin: specifically, it encodes an ortholog of the sigma2 subunit of adaptor protein complex 2 (AP2), which mediates endocytosis from the plasma membrane; APS-2 is required for embryonic and larval development and for normal body morphogenesis, but is not required for endocytosis of yolk protein…	AdaPtin, Small chain (clathrin associated complex)
F02E8.4	WBGene00017177	F02E8.4	none available	not known
F02G3.1	WBGene00017184	ncam-1	none available	NCAM (neural cell adhesion molecule) homolog
F02H6.2	WBGene00008535	F02H6.2	none available	not known
F02H6.3	WBGene00008536	F02H6.3	none available	not known
F02H6.4	WBGene00008537	F02H6.4	none available	not known
F07A11.3	WBGene00003791	npp-5	none available	Nuclear Pore complex Protein
F07A5.2	WBGene00008541	F07A5.2	none available	not known
F07A5.5	WBGene00006306	sue-1	none available	SUppressor of Elongation defect
F07B10.1	WBGene00000539	cln-3.1	none available	human CLN (neuronal ceroid lipofuscinosis) related
F07B10.2	WBGene00006167	str-116	none available	Seven TM Receptor
F07B7.12	WBGene00017190	F07B7.12	none available	not known
F07C4.12	WBGene00017205	F07C4.12	none available	not known
F07C4.17	WBGene00219880	F07C4.17	none available	not known
F07C4.6	WBGene00017200	F07C4.6	none available	not known
F07C4.7	WBGene00017201	grsp-4	none available	Glycine Rich Secreted Protein
F07C6.2	WBGene00008553	F07C6.2	none available	not known
F07C6.3	WBGene00008554	F07C6.3	none available	not known
F07C6.4	WBGene00008555	F07C6.4	none available	not known
F07D3.2	WBGene00001449	flp-6	none available	FMRF-Like Peptide
F07E5.2	WBGene00017208	fbxb-35	This gene encodes a protein containing an F-box, a motif predicted Concise description: This gene encodes a protein containing an F-box, a motif predicted to mediate protein-protein interactions either with homologs of yeast Skp-1p or with other proteins; its encoded protein also contains a Pfam-B45 motif of presently	F-box B protein
F07F6.4	WBGene00017217	F07F6.4	none available	not known
F07F6.7	WBGene00017219	F07F6.7	none available	not known
F07G11.1	WBGene00017228	F07G11.1	none available	not known
F07G11.4	WBGene00017231	F07G11.4	none available	not known
F07G6.10	WBGene00045271	F07G6.10	none available	not known
F07G6.7	WBGene00017226	fbxa-53	none available	F-box A protein
F07G6.8	WBGene00017227	F07G6.8	none available	not known
F07H5.13	WBGene00008563	F07H5.13	none available	not known
F07H5.6	WBGene00008557	F07H5.6	none available	not known
F08A10.1	WBGene00008570	kcnl-2	kcnl-2 encodes multiple isoforms of a small conductance, calcium-activated Concise description: kcnl-2 encodes multiple isoforms of a small conductance, calcium-activated potassium (K+) channel homologous to mammalian SK channels; KCNL-2 activity is required for regulation of the rate of egg laying: loss-of-function kcnl-2 mutations result in an egg-laying defective phenotype, while kcnl-2 overex…	KCNN (potassium K ChaNNel, calcium activated)-Like
F08A7.1	WBGene00045013	F08A7.1	none available	not known
F08A8.4	WBGene00008567	acox-1.4	none available	Acyl-Coenzyme A OXidase
F08B12.4	WBGene00008572	F08B12.4	none available	not known
F08B4.2	WBGene00000397	cdh-5	a homolog of cadherin.	CaDHerin family
F08B4.5	WBGene00017237	pole-2	none available	POLE (DNA POLymerase Epsilon) homolog
F08B4.6	WBGene00002028	hst-1	hst-1 encodes the C. elegans ortholog of N-deacetylase/N-sulfotransferase Concise description: hst-1 encodes the C. elegans ortholog of N-deacetylase/N-sulfotransferase (NDST), a bifunctional enzyme that catalyzes N-deacetylation and N-sulfation of N-acetylglucosamine residues in heparan sulfate; loss of hst-1 activity has been reported to result in embryonic lethality at various stages of develo…	Heparan SulphoTransferase
F08B4.7	WBGene00017238	F08B4.7	none available	not known
F08B4.8	WBGene00255375	F08B4.8	none available	not known
F08B6.4	WBGene00006819	unc-87	unc-87 encodes, through alternative splicing, two proteins Concise description: unc-87 encodes, through alternative splicing, two proteins that are required to maintain the structure of myofilaments in body wall muscle cells; UNC-87 proteins resemble the C-terminal repeat region of calponin but have no obvious orthologs outside of nematodes; in vitro, UNC-87 proteins exist as monomers in solution…	UNCoordinated
F08C6.1	WBGene00000083	adt-2	adt-2 encodes a member of the ADAMTS (a disintegrin and metalloprotease Concise description: adt-2 encodes a member of the ADAMTS (a disintegrin and metalloprotease with thrombospodin motif) family of secreated metalloproteases; ADT-2 binds to extracellular matrix and is involved in remodeling of the extracellular matrix; homozygous adt-2 mutants die at the 3-fold stage of embryogenesis or during…	ADAMTS family
F08C6.4	WBGene00006063	sto-1	none available	STOmatin
F08C6.5	WBGene00017243	F08C6.5	none available	not known
F08D12.10	WBGene00017253	sdz-9	This gene encodes a protein containing an F-box, a motif predicted Concise description: This gene encodes a protein containing an F-box, a motif predicted to mediate protein-protein interactions either with homologs of yeast Skp-1p or with other proteins; its encoded protein also contains a Pfam-B45 motif of presently	SKN-1 Dependent Zygotic transcript
F08D12.11	WBGene00017254	fbxb-111	This gene encodes a protein containing an F-box, a motif predicted Concise description: This gene encodes a protein containing an F-box, a motif predicted to mediate protein-protein interactions either with homologs of yeast Skp-1p or with other proteins; its encoded protein also contains a Pfam-B45 motif of presently	F-box B protein
F08D12.12	WBGene00017255	F08D12.12	none available	not known
F08D12.2	WBGene00017246	F08D12.2	none available	not known
F08D12.3	WBGene00017247	F08D12.3	none available	not known
F08D12.6	WBGene00017249	fbxb-108	This gene encodes a protein containing an F-box, a motif predicted Concise description: This gene encodes a protein containing an F-box, a motif predicted to mediate protein-protein interactions either with homologs of yeast Skp-1p or with other proteins; its encoded protein also contains a Pfam-B45 motif of presently	F-box B protein
F08D12.7	WBGene00017250	F08D12.7	F08D12.7 encodes a novel protein conserved amongst Caenorhaditis Concise description: F08D12.7 encodes a novel protein conserved amongst Caenorhaditis species; although loss of F08D12.7 activity via RNAi results in no obvious defects, F08D12.7 transcripts are enriched in L1-stage muscle and upregulated in L2 larvae in response to overexpression of hlh-2 and hlh-8; in addition, in analyses of the …	not known
F08D12.8	WBGene00017251	fbxb-105	This gene encodes a protein containing an F-box, a motif predicted Concise description: This gene encodes a protein containing an F-box, a motif predicted to mediate protein-protein interactions either with homologs of yeast Skp-1p or with other proteins; its encoded protein also contains a Pfam-B45 motif of presently	F-box B protein
F08D12.9	WBGene00017252	sdz-10	This gene encodes a protein containing an F-box, a motif predicted Concise description: This gene encodes a protein containing an F-box, a motif predicted to mediate protein-protein interactions either with homologs of yeast Skp-1p or with other proteins; its encoded protein also contains a Pfam-B45 motif of presently	SKN-1 Dependent Zygotic transcript
F08F1.1	WBGene00002195	kin-9	kin-9 encodes a predicted protein tyrosine kinase.	protein KINase
F08F1.4	WBGene00017258	F08F1.4	none available	not known
F08F1.5	WBGene00000422	ced-8	The ced-8 gene encodes a homolog of the human putative membrane Concise description: The ced-8 gene encodes a homolog of the human putative membrane transporter XK; ced-8 is required for apoptosis to occur with normal speed during	CEll Death abnormality
F08F1.6	WBGene00004998	spp-13	none available	SaPosin-like Protein family
F08F1.7	WBGene00006472	tag-123	none available	Temporarily Assigned Gene name
F08F1.8	WBGene00006649	tth-1	tth-1 encodes a thymosin beta ortholog that contains four functionally Concise description: tth-1 encodes a thymosin beta ortholog that contains four functionally distinct thymosin beta repeats; in vitro, TTH-1 binds multiple actin monomers as well as filamentous actin suggesting that, as its homology predicts, TTH-1 plays a direct role in regulating actin polymerization and cytoskeletal organiza…	Tetra THymosin (four thymosin repeat protein)
F08F3.3	WBGene00004358	rhr-1	rhr-1 encodes an ortholog of human Rhesus blood-group associated Concise description: rhr-1 encodes an ortholog of human Rhesus blood-group associated glycoprotein (RHAG; OMIM:180297, mutated in chronic hemolytic anemia), a member of the ammonium transporter family, and affects general levels of mRNA transcripts,	RH (Rhesus) antigen Related
F08F3.6	WBGene00017263	F08F3.6	This gene encodes a protein containing an F-box, a motif predicted Concise description: This gene encodes a protein containing an F-box, a motif predicted to mediate protein-protein interactions either with homologs of yeast Skp-1p or	not known
F08F3.7	WBGene00000373	cyp-14A5	cyp-14A5 encodes one of ~80 C. elegans cytochrome P450s: membrane-associated, Concise description: cyp-14A5 encodes one of ~80 C. elegans cytochrome P450s: membrane-associated, heme-containing NADPH-dependent monooxygenases that catalyze the oxidative metabolism of a variety of exogenous compounds and endogenous substrates; cyp-14A5 expression is upregulated in response to stressors such as ioniz…	CYtochrome P450 family
F08F3.8	WBGene00017264	F08F3.8	none available	not known
F08F8.4	WBGene00017269	F08F8.4	none available	not known
F08F8.6	WBGene00017271	F08F8.6	none available	not known
F08G12.1	WBGene00008585	F08G12.1	none available	not known
F08G12.10	WBGene00002124	inx-2	none available	INneXin
F08G12.11	WBGene00044135	F08G12.11	none available	not known
F08G12.2	WBGene00008586	snrp-40.1	none available	Small Nuclear RibonucleoProtein homolog
F08G12.8	WBGene00008589	nlp-57	none available	Neuropeptide-Like Protein
F08G2.5	WBGene00008577	F08G2.5	none available	not known
F08G2.6	WBGene00002120	ins-37	ins-37 encodes an insulin-like peptide.	INSulin related
F08G2.8	WBGene00008579	F08G2.8	none available	not known
F08G5.6	WBGene00008584	irg-4	F08G5.6 encodes a CUB-like domain-containing protein; F08G5.6 Concise description: F08G5.6 encodes a CUB-like domain-containing protein; F08G5.6 is involved in the transcriptional, innate immune response towards several different bacterial pathogens; an F08G5.6::gfp promoter fusion is expressed in the intestine and in head neurons; F08G5.6 expression is positively regulated in the intestine	Infection Response Gene
F08H9.12	WBGene00023515	srz-97	none available	Serpentine Receptor, class Z
F08H9.15	WBGene00235106	F08H9.15	none available	not known
F08H9.3	WBGene00008591	F08H9.3	F08H9.3 encodes a heat shock protein (HSP) of the HSP16 class; Concise description: F08H9.3 encodes a heat shock protein (HSP) of the HSP16 class; unlike most HSP16s in C. elegans, it is specifically expressed in a particular tissue (the larval pharynx and the anterior adult pharynx), and its expression is not strongly induced by heat shock; however, F08H9.3 expression is increased by heat shock …	not known
F08H9.4	WBGene00008592	F08H9.4	F08H9.4 encodes a heat shock protein (HSP) of the HSP16 class; Concise description: F08H9.4 encodes a heat shock protein (HSP) of the HSP16 class; unlike most HSP16s in C. elegans, it is specifically expressed in a particular tissue (the excretory canal and ventral nerve-cord neurons), and its expression is only mildly induced by heat shock; however, F08H9.4 expression is increased by heat shock,…	not known
F08H9.5	WBGene00008593	clec-227	none available	C-type LECtin
F08H9.6	WBGene00008594	clec-57	none available	C-type LECtin
F08H9.8	WBGene00008596	clec-54	none available	C-type LECtin
F08H9.9	WBGene00008597	clec-55	none available	C-type LECtin
F09A5.14	WBGene00219579	linc-43	none available	Long Intervening Non-Coding RNA
F09A5.9	WBGene00045245	ttr-34	none available	TransThyretin-Related family domain
F09B12.1	WBGene00008605	mlt-9	none available	MoLTing defective
F09B12.2	WBGene00008606	dhhc-1	none available	DHHC-types zinc finger protein
F09B12.6	WBGene00001468	flr-4	flr-4 encodes a predicted Ser/Thr protein kinase that affects Concise description: flr-4 encodes a predicted Ser/Thr protein kinase that affects sensitivity to fluoride ion, growth, defecation cycle periods, dauer formation; expressed in the intestine, the AUA neurons, the pharyngeal isthmus, and in the	FLuoRide resistant
F09B9.1	WBGene00008602	oac-14	none available	O-ACyltransferase homolog
F09B9.3	WBGene00001331	erd-2	erd-2 encodes a protein with homology to human ER lumen protein Concise description: erd-2 encodes a protein with homology to human ER lumen protein	ERD (yeast endoplasmic reticulum retention defective) related
F09C12.1	WBGene00001588	ggr-3	ggr-3 encodes a predicted member of the GABA/ glycine receptor Concise description: ggr-3 encodes a predicted member of the GABA/ glycine receptor family of ligand-gated chloride channels; expressed in the AVA, AVB, SMDD, DVA,	GABA/Glycine Receptor family (see gbr)
F09C12.8	WBGene00017279	F09C12.8	F09C12.8 encodes an ortholog, predicted to be catalytically Concise description: F09C12.8 encodes an ortholog, predicted to be catalytically inactive, of Bombyx mori ecdysteroid phosphate phosphatase (EPP), human STS1 (OMIM:609201) and human UBASH3A (OMIM:605736); F09C12.8 is also paralogous to C. elegans C52E4.7,	not known
F09C3.2	WBGene00008610	F09C3.2	none available	not known
F09C3.3	WBGene00008611	fbxb-68	This gene encodes a protein containing an F-box, a motif predicted Concise description: This gene encodes a protein containing an F-box, a motif predicted to mediate protein-protein interactions either with homologs of yeast Skp-1p or with other proteins; its encoded protein also contains a Pfam-B45 motif of presently	F-box B protein
F09C3.4	WBGene00008612	fbxa-103	This gene encodes a protein containing an F-box, a motif predicted Concise description: This gene encodes a protein containing an F-box, a motif predicted to mediate protein-protein interactions either with homologs of yeast Skp-1p or with other proteins; this gene's encoded protein also contains an FTH/DUF38 motif,	F-box A protein
F09C3.5	WBGene00008613	fbxb-69	none available	F-box B protein
F09C6.10	WBGene00008620	F09C6.10	none available	not known
F09C6.13	WBGene00044183	F09C6.13	none available	not known
F09C6.14	WBGene00044278	F09C6.14	none available	not known
F09C6.2	WBGene00008616	fbxa-44	This gene encodes a protein containing an F-box, a motif predicted Concise description: This gene encodes a protein containing an F-box, a motif predicted to mediate protein-protein interactions either with homologs of yeast Skp-1p or with other proteins; this gene's encoded protein also contains an FTH/DUF38 motif,	F-box A protein
F09C6.4	WBGene00005651	srp-10	none available	SeRPin
F09C8.1	WBGene00008621	F09C8.1	none available	not known
F09C8.2	WBGene00008622	F09C8.2	none available	not known
F09D1.1	WBGene00017280	usp-39	none available	Ubiquitin Specific Protease
F09D12.1	WBGene00001699	grd-10	grd-10 encodes a hedgehog-like protein, with an N-terminal Concise description: grd-10 encodes a hedgehog-like protein, with an N-terminal signal sequence and a C-terminal Ground domain; GRD-10 is expressed in seam cells; the Ground domain is predicted to form a cysteine-crosslinked protein involved in intercellular signalling, and it has subtle similarity to the N-terminal Hedge domain of HEDGEH…	GRounDhog (hedgehog-like family)
F09E10.1	WBGene00017294	F09E10.1	none available	not known
F09E10.11	WBGene00006650	tts-1	none available	Transcribed Telomerase-like Sequence
F09E10.6	WBGene00017296	F09E10.6	none available	not known
F09E10.7	WBGene00017297	F09E10.7	none available	not known
F09E5.13	WBGene00000094	agt-2	agt-2 encodes a paralog of the DNA repair enzyme O6-Alkylguanine Concise description: agt-2 encodes a paralog of the DNA repair enzyme O6-Alkylguanine DNA-alkyltransferase (AGT); AGT-2 has AGT biochemical activity and is expressed	AlkylGuanine DNA alkylTransferase
F09E5.14	WBGene00017291	F09E5.14	none available	not known
F09E5.16	WBGene00017292	F09E5.16	none available	not known
F09E8.5	WBGene00008625	scl-14	none available	SCP-Like extracellular protein
F09E8.6	WBGene00003533	nas-14	nas-14 encodes an astacin-like metalloprotease; large-scale Concise description: nas-14 encodes an astacin-like metalloprotease; large-scale expression studies reveal that a nas-14::GFP promoter fusion is expressed in the	Nematode AStacin protease
F09E8.8	WBGene00008626	nlp-79	none available	Neuropeptide-Like Protein
F09F3.1	WBGene00006021	srx-130	none available	Serpentine Receptor, class X
F09F3.6	WBGene00008628	ttr-21	none available	TransThyretin-Related family domain
F09F3.8	WBGene00014732	F09F3.8	none available	not known
F09F3.9	WBGene00008629	cpt-5	none available	Carnitine Palmitoyl Transferase
F09F7.1	WBGene00017299	molo-1	none available	MOdulator of LevamisOle-sensitive receptor
F09F7.7	WBGene00017304	nmad-1	none available	N6 Methyl Adenine Demethylase
F09F7.8	WBGene00017305	nspb-12	none available	Nematode Specific Peptide family, group B
F09F9.1	WBGene00017306	F09F9.1	none available	not known
F09F9.2	WBGene00017307	F09F9.2	none available	not known
F09F9.4	WBGene00017309	F09F9.4	none available	not known
F09G2.1	WBGene00017310	F09G2.1	none available	not known
F09G2.4	WBGene00017313	cpsf-2	none available	Cleavage and Polyadenylation Specificity Factor
F09G2.6	WBGene00017315	ugt-36	none available	UDP-GlucuronosylTransferase
F09G2.9	WBGene00017317	attf-2	none available	AT hook Transcription Factor family
F09G8.6	WBGene00000666	col-91	col-91 encodes a cuticle collagen; loss of col-91 via large-scale Concise description: col-91 encodes a cuticle collagen; loss of col-91 via large-scale	COLlagen
F09G8.8	WBGene00017322	clec-160	none available	C-type LECtin
F10A3.4	WBGene00008634	F10A3.4	none available	not known
F10B5.3	WBGene00008640	F10B5.3	none available	not known
F10B5.5	WBGene00008641	pch-2	pch-2 encodes a putative AAA+-type ATPase orthologous to budding Concise description: pch-2 encodes a putative AAA+-type ATPase orthologous to budding yeast PCH2 and human TRIP13 (OMIM:604507); PCH-2 is required for the apoptosis of pachytene cells induced by unsynapsed chromosomal pairing centers, but is dispensable for meiotic apoptosis induced by DNA damage; PCH-2-mediated apoptosis is inhibit…	Pachytene CHeckpoint protein (yeast PCH homolog)
F10B5.9	WBGene00008643	tmem-138	none available	TMEM (human TransMEMbrane protein) homolog
F10C1.23	WBGene00271819	F10C1.23	none available	not known
F10C1.3	WBGene00017325	F10C1.3	none available	not known
F10C1.5	WBGene00017326	dmd-5	none available	DM (Doublesex/MAB-3) Domain family
F10C1.9	WBGene00044296	F10C1.9	none available	not known
F10C2.7	WBGene00008647	F10C2.7	none available	not known
F10C5.2	WBGene00017328	F10C5.2	none available	not known
F10D11.2	WBGene00008648	F10D11.2	none available	not known
F10D11.3	WBGene00008649	F10D11.3	none available	not known
F10D2.11	WBGene00017336	ugt-41	none available	UDP-GlucuronosylTransferase
F10D2.4	WBGene00006163	str-112	str-112 encodes a G protein-coupled receptor of the STR olfactory Concise description: str-112 encodes a G protein-coupled receptor of the STR olfactory receptor family; STR-112 is expressed in the AWA neuron where is localizes to cilia;	Seven TM Receptor
F10D2.5	WBGene00017331	ugt-40	none available	UDP-GlucuronosylTransferase
F10D7.1	WBGene00017338	F10D7.1	none available	not known
F10E7.1	WBGene00017343	F10E7.1	none available	not known
F10E9.1	WBGene00017353	F10E9.1	none available	not known
F10E9.12	WBGene00017361	F10E9.12	none available	not known
F10E9.2	WBGene00017354	F10E9.2	none available	not known
F10E9.3	WBGene00017355	F10E9.3	none available	not known
F10E9.7	WBGene00017358	F10E9.7	none available	not known
F10F2.3	WBGene00008655	lips-3	none available	LIPaSe related
F10F2.4	WBGene00008656	lron-5	none available	eLRR (extracellular Leucine-Rich Repeat) ONly
F10F2.7	WBGene00008659	clec-151	none available	C-type LECtin
F10G2.1	WBGene00017362	F10G2.1	none available	not known
F10G2.2	WBGene00017363	F10G2.2	none available	not known
F10G2.3	WBGene00017364	clec-7	none available	C-type LECtin
F10G2.4	WBGene00017365	F10G2.4	none available	not known
F10G2.9	WBGene00017367	nhr-263	none available	Nuclear Hormone Receptor family
F10G7.12	WBGene00044744	F10G7.12	none available	not known
F10G7.3	WBGene00006817	unc-85	none available	UNCoordinated
F10G7.4	WBGene00004737	scc-1	scc-1 encodes a member of the Rad21/Rec8-like family of cohesion Concise description: scc-1 encodes a member of the Rad21/Rec8-like family of cohesion proteins that affects embryonic viability, fertility, the rate of embryonic cell divisions and the incidence of male progeny; interacts with ATL-1, F56D12.5, and F11E6.1 based on yeast two-hybrid assays, and is expressed in nondividing embryonic	yeast SCC (mitotic condensin subunit) homolog
F10G8.2	WBGene00008662	F10G8.2	none available	not known
F10G8.4	WBGene00008663	eak-6	eak-6 encodes a protein tyrosine phosphatase paralogous to Concise description: eak-6 encodes a protein tyrosine phosphatase paralogous to SDF-9; eak-6 acts in parallel to akt-1 to regulate insulin-like signaling and dauer formation; EAK-6 is expressed in the neuroendocrine XXXL/R cells, where it localizes	Enhancer of AKt-1 null
F10G8.7	WBGene00008665	ercc-1	ercc-1 encodes an ortholog of human ERCC1 (mutations in which Concise description: ercc-1 encodes an ortholog of human ERCC1 (mutations in which are associated with Cerebrooculofacioskeletal Syndrome 4; OMIM:126380); ercc-1 is a core NER (Nuclear Excision Repair) factor (other members being xpa-1, xpf-1, and xpg-1); NER factors remove UV-induced DNA damage and have been demonstrated to be require…	ERCC (DNA excision repair protein) homolog
F11A10.2	WBGene00008683	repo-1	none available	REversed POlarity in early embryos
F11A3.2	WBGene00008670	eif-2Bdelta	none available	Eukaryotic Initiation Factor
F11A5.10	WBGene00001591	glc-1	glc-1 encodes the alpha subunit of a glutamate-gated chloride Concise description: glc-1 encodes the alpha subunit of a glutamate-gated chloride channel and forms a functional channel in Xenopus oocytes; mutations genetically interact with avr-14 and avr-15 mutations such that triple mutants exhibit high	Glutamate-gated ChLoride channel
F11A5.11	WBGene00005547	sri-35	none available	Serpentine Receptor, class I
F11A5.12	WBGene00008678	stdh-2	stdh-2 encodes a putative steroid dehydrogenase required for Concise description: stdh-2 encodes a putative steroid dehydrogenase required for normally short lifespan; STDH-2 is orthologous to human HSD17B3 (OMIM:605573, mutated in pseudohermaphroditism), HSD17B12 (OMIM:609574), and HSDL1, and paralogous	STeroid DeHydrogenase family
F11A5.5	WBGene00008673	F11A5.5	none available	not known
F11A5.9	WBGene00008677	F11A5.9	none available	not known
F11A6.15	WBGene00206532	F11A6.15	none available	not known
F11C1.1	WBGene00008690	F11C1.1	none available	not known
F11C1.2	WBGene00008691	mff-1	none available	Mitochondrial Fission Factor
F11C1.3	WBGene00008692	scav-4	none available	SCAVenger receptor (CD36 family) related
F11C1.6	WBGene00003623	nhr-25	nhr-25 encodes a nuclear hormone receptor orthologous to Drosophila Concise description: nhr-25 encodes a nuclear hormone receptor orthologous to Drosophila Ftz-F1; NHR-25 is required for embryogenesis, molting, vulval and gonadal development, and hypodermal expression of acn-1; nhr-25 is expressed in gonads and loaded into embryos as a maternal transcript; nhr-25 is zygotically expressed in prog…	Nuclear Hormone Receptor family
F11C1.7	WBGene00045495	F11C1.7	none available	not known
F11C3.1	WBGene00008695	F11C3.1	none available	not known
F11C7.2	WBGene00017376	F11C7.2	none available	not known
F11C7.3	WBGene00006886	vap-1	vap-1 encodes a predicted secreted protein that is similar Concise description: vap-1 encodes a predicted secreted protein that is similar to the venom allergen-like proteins found in a number of invertebrates, including parasitic nematodes; a vap-1 reporter fusion is expressed specifically within the	Venom-Allergen-like Protein
F11C7.4	WBGene00000792	crb-1	crb-1 encodes a transmembrane protein with EGF-like and laminin Concise description: crb-1 encodes a transmembrane protein with EGF-like and laminin repeats homologous to Drosophila CRUMBS; crb-1 appears to function redundantly with let-413 to effect epithelial polarization; CRB-1 localizes to cell junctions of non-cuticular epithelia, such as the intestine and the pharynx, near the apical	Drosophila CRumBs homolog
F11C7.5	WBGene00003891	osm-11	osm-11 encodes a protein required for normal osmosensation, Concise description: osm-11 encodes a protein required for normal osmosensation, osmotic resistance, and defecation rhythm, and for fully normal growth rate; OSM-11 has no clear orthologs outside of nematodes, but is paralogous to DOS-1, OSM-7, and K02F3.7, has a predicted signal sequence with 12 conserved cysteine residues, and may be s…	OSMotic avoidance abnormal
F11C7.7	WBGene00017379	F11C7.7	none available	not known
F11D5.1	WBGene00017380	F11D5.1	none available	not known
F11D5.3	WBGene00017381	ddr-2	F11D5.3 encodes a putative tyrosine kinase homologous to human Concise description: F11D5.3 encodes a putative tyrosine kinase homologous to human	Discoidin Domain Receptor
F11E6.10	WBGene00008713	F11E6.10	none available	not known
F11E6.11	WBGene00023501	F11E6.11	none available	not known
F11E6.3	WBGene00008707	F11E6.3	none available	not known
F11E6.6	WBGene00008709	F11E6.6	none available	not known
F11E6.7	WBGene00008710	F11E6.7	none available	not known
F11E6.9	WBGene00008712	F11E6.9	none available	not known
F11F1.7	WBGene00008719	ttr-52	ttr-52 encodes a transthyretin-like secreted protein that is Concise description: ttr-52 encodes a transthyretin-like secreted protein that is required for proper cell corpse engulfment; genetic analysis indicates that ttr-52 functions in the ced-1/CD91 pathway for engulfment; TTR-52 binds to both surface-exposed phosphatidylserine in vivo and the extracellular domain of CED-1, therefore acting l…	TransThyretin-Related family domain
F11G11.1	WBGene00001756	gst-8	gst-8 encodes a predicted glutathione S-transferase.	Glutathione S-Transferase
F11G11.10	WBGene00000606	col-17	col-17 encodes a collagen which is expressed in all developmental Concise description: col-17 encodes a collagen which is expressed in all developmental stages except eggs, like col-15, col-16, and col-20; collagen genes with this expression	COLlagen
F11G11.11	WBGene00000609	col-20	col-20 encodes a collagen; its expression pattern and mutant Concise description: col-20 encodes a collagen; its expression pattern and mutant	COLlagen
F11G11.12	WBGene00000649	col-73	none available	COLlagen
F11G11.15	WBGene00271822	F11G11.15	none available	not known
F11G11.4	WBGene00017384	F11G11.4	none available	not known
F11G11.8	WBGene00017386	nspd-5	none available	Nematode Specific Peptide family, group D
F11G11.9	WBGene00017387	mpst-4	none available	MercaptoPyruvate SulfurTransferase homolog
F11H8.2	WBGene00017389	lgc-38	F11H8.2 encodes an UNC-49-like GABA receptor subunit.	Ligand-Gated ion Channel
F11H8.3	WBGene00000597	col-8	col-8 encodes a collagen, individually dispensable for viability Concise description: col-8 encodes a collagen, individually dispensable for viability and gross morphology, which is specifically expressed in dauers and adults but not in eggs or L4 larvae, like col-7, col-18, and col-19; the amino- and carboxyl-terminal cysteine-rich regions of COL-8 are most closely related to those of COL-19, CO…	COLlagen
F12A10.1	WBGene00017390	F12A10.1	none available	not known
F12A10.4	WBGene00017393	nep-5	F12A10.4 encodes a neprilysin; neprilysins are thermolysin-like Concise description: F12A10.4 encodes a neprilysin; neprilysins are thermolysin-like zinc metallopeptidases, found on the outer surface of animal cells, that negatively regulate small signalling peptides (e.g., enkephalin, tachykinin, insulin, and natriuretic	NEPrilysin metallopeptidase family
F12A10.8	WBGene00017397	F12A10.8	none available	not known
F12A10.9	WBGene00077704	F12A10.9	none available	not known
F12B6.2	WBGene00017398	slc-17.6	none available	SLC (SoLute Carrier) homolog
F12E12.1	WBGene00017402	F12E12.1	none available	not known
F12E12.10	WBGene00044694	fbxb-90	none available	F-box B protein
F12E12.11	WBGene00044811	F12E12.11	none available	not known
F12E12.4	WBGene00017405	bath-31	none available	BTB and MATH domain containing
F12E12.7	WBGene00017408	sdz-11	none available	SKN-1 Dependent Zygotic transcript
F12E12.8	WBGene00044692	fbxb-91	none available	F-box B protein
F12E12.9	WBGene00044693	fbxb-92	none available	F-box B protein
F12F3.1	WBGene00001374	exp-2	exp-2 encodes a member of the six-transmembrane voltage-activated Concise description: exp-2 encodes a member of the six-transmembrane voltage-activated (Kv-type) family of potassium channels; exp-2 is required for normal pharyngeal muscle action potentials and hence, for normal feeding behavior; in addition, exp-2 is required for chemotaxis; when expressed in Xenopus oocytes, EXP-2 displays inwa…	EXPulsion defective (defecation)
[truncated: 5,297 more rows]

## Sheet: DEG_YA_vs_L1
Table S4 Deferentially expressed genes between embryo, L1 and young adult stage.
Sequence name	WBID	Symbol	Concise	Gene class
2RSSE.1	WBGene00007064	2RSSE.1	2RSSE.1 encodes a protein that contains a RhoGAP domain and Concise description: 2RSSE.1 encodes a protein that contains a RhoGAP domain and that is similar to Drosophila RhoGAP71E whose activity regulates the number and	not known
AC3.10	WBGene00004964	spe-10	spe-10 encodes a DHHC-CRD family zinc-finger transmembrane Concise description: spe-10 encodes a DHHC-CRD family zinc-finger transmembrane protein with homologs in other eukaryotes and is predicted to be a palmitoyl transferase; spe-10 is required during spermatogenesis and thus for fertility; specifically, spe-10 is required for the proper biogenesis and functioning of specialized Golgi-derived …	defective SPErmatogenesis
AC3.3	WBGene00000024	abu-1	abu-1 encodes a transmembrane protein with a predicted signal Concise description: abu-1 encodes a transmembrane protein with a predicted signal sequence, a glutamine/asparagine-rich domain and multiple cysteine-rich repeats (DUF139); abu-1 expression is induced by blockage of the endoplasmic reticulum unfolded protein response, and ABU-1 may help protect the organism from damage by improperly fo…	Activated in Blocked Unfolded protein response
AC3.7	WBGene00007072	ugt-1	none available	UDP-GlucuronosylTransferase
AH10.1	WBGene00007082	acs-10	none available	fatty Acid CoA Synthetase family
AH6.10	WBGene00005032	sra-6	sra-6 encodes a seven-transmembrane chemosensory receptor; Concise description: sra-6 encodes a seven-transmembrane chemosensory receptor; an sra-6::GFP fusion reporter is expressed in the ASH (strongly) and ASI (weakly) amphid sensory neurons, the PVQ interneurons, and in the SPD and SPV male spicule neurons; sra-6 expression in the ASH neurons is positively regulated by KIN-29, a serine/threoni…	Serpentine Receptor, class A (alpha)
AH6.5	WBGene00003231	mex-6	mex-6 encodes a CCCH zinc-finger protein highly similar to Concise description: mex-6 encodes a CCCH zinc-finger protein highly similar to MEX-5 that functions with MEX-5 to affect embryonic viability, establish soma germline asymmetry in embryos and establish PIE-1, MEX-1, and POS-1 asymmetry in embryos, and also affects formation of intestinal cells; MEX-6 and MEX-5 may act downstream	Muscle EXcess
AH9.2	WBGene00000797	crn-4	crn-4 encodes a DEDD family DNase, a cell death-related nuclease; Concise description: crn-4 encodes a DEDD family DNase, a cell death-related nuclease; crn-4 exhibits both DNase and RNase activities; crn-4 is believed to function in a large multinuclease complex, the degradeosome, whose components include the protein products of cps-6, crn-1, crn-5, cpy-13 and other non-nuclease components like …	Cell-death-Related Nuclease
AH9.6	WBGene00044701	AH9.6	AH9.6 encodes a novel protein that contains two predicted transmembrane Concise description: AH9.6 encodes a novel protein that contains two predicted transmembrane	not known
B0001.2	WBGene00007087	B0001.2	none available	not known
B0001.5	WBGene00007090	B0001.5	none available	not known
B0001.7	WBGene00007092	B0001.7	none available	not known
B0024.1	WBGene00000722	col-149	none available	COLlagen
B0024.14	WBGene00007103	crm-1	crm-1 encodes a predicted transmembrane protein with multiple Concise description: crm-1 encodes a predicted transmembrane protein with multiple extracellular cysteine-rich (CR) domains that is the C. elegans ortholog of vertebrate CRIM1 (Cysteine-RIch Motor neuron 1); genetic analyses indicate that CRM-1 functions non-autonomously to positively regulate DBL-1/BMP-mediated signaling in the pathwa…	CRiM (Cysteine Rich motor neuron protein) homolog
B0024.3	WBGene00007096	B0024.3	none available	not known
B0024.4	WBGene00007097	B0024.4	none available	not known
B0024.8	WBGene00000491	che-12	che-12 encodes a conserved protein orthologous to the mammalian Concise description: che-12 encodes a conserved protein orthologous to the mammalian protein Crescerin1 encoded by the gene FAM179B (KIAA0423); CHE-12 activity is required continuously in sensory neurons for formation of distal ciliary segments and thus, for normal sensory cilium morphology and function and chemotaxis to a subset of …	abnormal CHEmotaxis
B0025.5	WBGene00194700	B0025.5	none available	not known
B0025.7	WBGene00219778	B0025.7	none available	not known
B0025.8	WBGene00219779	B0025.8	none available	not known
B0034.3	WBGene00000403	casy-1	casy-1 encodes a type I transmembrane protein with two extracellular Concise description: casy-1 encodes a type I transmembrane protein with two extracellular cadherin domains and an LG/LNS domain that is the sole C. elegans calsyntenin/alcadein ortholog; genetic studies indicate that in C. elegans casy-1 activity is required, in parallel to the insulin-like signaling pathway, for several types o…	CAlSYntenin/Alcadein homolog
B0034.4	WBGene00015004	B0034.4	none available	not known
B0034.7	WBGene00044394	B0034.7	B0034.7 is a predicted gene that can encode a small, novel Concise description: B0034.7 is a predicted gene that can encode a small, novel protein that has similarity to a predicted C. remanei protein and to a region of	not known
B0035.15	WBGene00007113	B0035.15	none available	not known
B0035.16	WBGene00007114	mttu-1	mttu-1 encodes a mitochondrial tRNA 2-thiouridylase orthologous Concise description: mttu-1 encodes a mitochondrial tRNA 2-thiouridylase orthologous to human TRMU (tRNA 5-methylaminomethyl-2-thiouridylate methyltransferase); by homology, nuclear-encoded MTTU-1 is predicted to catalyze the 2-thiolation of uridine at the wobble position (U34) of mitochondrial tRNAs and thereby promote mitochondrial…	nuclear encoded Mitochondrial TRNA 2-ThioUridylase
B0035.18	WBGene00044290	B0035.18	none available	not known
B0035.3	WBGene00007106	B0035.3	none available	not known
B0035.6	WBGene00007109	B0035.6	none available	not known
B0035.7	WBGene00001921	his-47	his-47 encodes an H2A histone; by homology, HIS-47 is predicted Concise description: his-47 encodes an H2A histone; by homology, HIS-47 is predicted to function as a nucleosome component required for packaging of DNA into chromatin; his-47 is a replication-dependent histone locus that resides in a histone gene-rich	HIStone
B0041.8	WBGene00015011	B0041.8	none available	not known
B0047.3	WBGene00015014	bath-24	none available	BTB and MATH domain containing
B0047.5	WBGene00015016	bath-14	none available	BTB and MATH domain containing
B0198.3	WBGene00007116	B0198.3	none available	not known
B0205.1	WBGene00015017	B0205.1	none available	not known
B0205.10	WBGene00015024	B0205.10	none available	not known
B0205.12	WBGene00044413	B0205.12	none available	not known
B0205.3	WBGene00004466	rpn-10	rpn-10 encodes a protein that contains two ubiquitin interaction Concise description: rpn-10 encodes a protein that contains two ubiquitin interaction motifs and is a member of the von Willebrand factor, type A superfamily similar	proteasome Regulatory Particle, Non-ATPase-like
B0205.4	WBGene00015019	B0205.4	The B0205.4 gene encodes a homolog of the human gene FUT1, Concise description: The B0205.4 gene encodes a homolog of the human gene FUT1,	not known
B0207.1	WBGene00015026	B0207.1	none available	not known
B0207.11	WBGene00015034	B0207.11	B0207.11 encodes a nematode-specific protein probably required Concise description: B0207.11 encodes a nematode-specific protein probably required for a normally high ovulation rate; B0207.11 has no obvious non-nematode homologs, but does have a putative N-terminal coiled-coil domain and an SH2 motif, and is is paralogous to four other C. elegans proteins (F42G4.6, F44F4.10, T08G11.2, and Y81G3A.…	not known
B0207.3	WBGene00001676	gpa-14	gpa-14 encodes a member of the G protein alpha subunit family Concise description: gpa-14 encodes a member of the G protein alpha subunit family of heterotrimeric GTPases; gpa-14 is expressed in ASI, ASJ, ASH, ASK, ADE, PHA, PHB ALA, AVA, CAN, DVA, PVQ, RIA, and in vulval muscle, and also exhibits faint	G Protein, Alpha subunit
B0207.4	WBGene00000099	air-2	air-2 encodes an aurora/Ipl1-related serine/threonine protein Concise description: air-2 encodes an aurora/Ipl1-related serine/threonine protein kinase that affects embryonic viability and chromosome segregation during meiosis and mitosis and is required for cytokinesis; AIR-2 has two functions during mitosis, one in chromosome segregation, and a second, independent function in cytokinesis throug…	Aurora/Ipl1 Related kinase
B0207.7	WBGene00015030	B0207.7	none available	not known
B0207.9	WBGene00015032	B0207.9	none available	not known
B0213.10	WBGene00015040	cyp-34A5	none available	CYtochrome P450 family
B0213.12	WBGene00015042	cyp-34A7	none available	CYtochrome P450 family
B0213.15	WBGene00015044	cyp-34A9	none available	CYtochrome P450 family
B0213.17	WBGene00015046	nlp-34	none available	Neuropeptide-Like Protein
B0213.5	WBGene00003768	nlp-30	nlp-30 encodes five predicted neuropeptide-like proteins; in Concise description: nlp-30 encodes five predicted neuropeptide-like proteins; in C. elegans, nlp-30 is part of the YGGWamide neuropeptide family that also contains nlp-24, nlp-25, and nlp-27-32; nlp-30 is expressed in the hypodermis, suggesting that the peptides it encodes may have a non-neuronal function; as loss of nlp-30 activity vi…	Neuropeptide-Like Protein
B0218.3	WBGene00004055	pmk-1	pmk-1 encodes a mitogen-activated protein kinase (MAPK), orthologous Concise description: pmk-1 encodes a mitogen-activated protein kinase (MAPK), orthologous to human p38 MAPK (OMIM:600289); PMK-1 is an essential component of the MAPK pathway that regulates the innate immune response; PMK-1 is required, upstream of CED-9, for eliciting gonadal programmed cell death in response to Salmonella ente…	P38 Map Kinase family
B0218.5	WBGene00015049	B0218.5	none available	not known
B0218.6	WBGene00015050	clec-51	none available	C-type LECtin
B0222.1	WBGene00015053	B0222.1	none available	not known
B0222.10	WBGene00015058	B0222.10	none available	not known
B0222.11	WBGene00044582	B0222.11	B0222.11 encodes a novel protein with a predicted signal sequence Concise description: B0222.11 encodes a novel protein with a predicted signal sequence	not known
B0222.3	WBGene00015055	pitr-3	none available	PIT (mammalian phosphate transporter) Related
B0222.7	WBGene00000718	col-145	none available	COLlagen
B0222.8	WBGene00000599	col-10	none available	COLlagen
B0228.6	WBGene00015063	B0228.6	none available	not known
B0238.1	WBGene00015067	B0238.1	none available	not known
B0238.13	WBGene00015077	B0238.13	none available	not known
B0238.15	WBGene00044537	B0238.15	none available	not known
B0238.9	WBGene00015073	B0238.9	none available	not known
B0240.1	WBGene00004359	rhr-2	rhr-2 encodes a predicted transmembrane protein with similarity Concise description: rhr-2 encodes a predicted transmembrane protein with similarity to human Rh blood group antigens proposed to function in inorganic ion transport and metabolism; the role of RHR-2 in C. elegans development or behavior remains unclear, as loss of RHR-2 function via RNA-mediated interference does not result	RH (Rhesus) antigen Related
B0240.3	WBGene00000907	daf-11	daf-11 encodes a transmembrane guanylate cyclase; daf-11 activity Concise description: daf-11 encodes a transmembrane guanylate cyclase; daf-11 activity is required for a number of processes dependent upon normal chemosensory function, including dauer formation and recovery and chemotaxis to both volatile and non-volatile odorants; daf-11 is also required for axon formation; daf-11 acts together …	abnormal DAuer Formation
B0244.2	WBGene00002048	ida-1	ida-1 encodes a protein tyrosine phosphatase-like receptor, Concise description: ida-1 encodes a protein tyrosine phosphatase-like receptor, orthologous to the mammalian type I diabetes autoantigens IA-2 and phogrin that are expressed in dense core vesicles of neuroendocrine tissue and involved in regulated protein secretion; in C. elegans, IDA-1 appears to be required for regulating presynaptic …	related to Islet cell Diabetes Autoantigen
B0244.8	WBGene00015083	egg-1	egg-1 encodes a LDL-receptor repeat-containing protein that Concise description: egg-1 encodes a LDL-receptor repeat-containing protein that is required for fertilization; egg-1 acts redundantly with a similar protein, egg-2, and both proteins are expressed in the developing oocyte; egg-1 is not required for male fertility; egg-1 localizes to the oocyte plasma membrane; the structure and localiza…	EGG sterile (unfertilizable)
B0250.12	WBGene00050927	B0250.12	none available	not known
B0250.4	WBGene00007121	B0250.4	none available	not known
B0250.5	WBGene00007122	B0250.5	none available	not known
B0250.7	WBGene00007124	B0250.7	none available	not known
B0252.1	WBGene00015087	B0252.1	none available	not known
B0252.4	WBGene00000886	cyn-10	cyn-10 encodes a divergent cyclophilin isoform that is functional Concise description: cyn-10 encodes a divergent cyclophilin isoform that is functional	CYclophyliN
B0261.1	WBGene00015091	B0261.1	none available	not known
B0261.2	WBGene00002583	let-363	none available	LEThal
B0261.6	WBGene00015094	B0261.6	none available	not known
B0261.7	WBGene00015095	B0261.7	none available	not known
B0273.2	WBGene00004243	puf-7	puf-7 encodes a protein 97% identical to PUF-6 and functions Concise description: puf-7 encodes a protein 97% identical to PUF-6 and functions redundantly with the other PUF genes, fbf-1, fbf-2, puf-6, and puf-8, during primordial germ cell development, based on combinatorial RNAi; interacts with NOS-2 in yeast	PUF (Pumilio/FBF) domain-containing
B0273.3	WBGene00015098	snpc-3.1	none available	SNAPc (Small Nuclear RNA Activating Complex) homolog
B0280.10	WBGene00015105	pot-1	none available	Protection Of Telomeres 1 (Pot1) homolog
B0280.11	WBGene00015106	B0280.11	none available	not known
B0280.12	WBGene00001613	glr-2	glr-2 encodes an AMPA (non-NMDA)-type ionotropic glutamate Concise description: glr-2 encodes an AMPA (non-NMDA)-type ionotropic glutamate receptor subunit; GLR-2 activity is required for mediating the behavioral response to light nose touch and for regulating the frequency with which animals change locomotory direction in response to sensory cues such as food; GLR-2 and GLR-1, a second AMPA-type…	GLutamate Receptor family (AMPA)
B0280.17	WBGene00044674	B0280.17	none available	not known
B0280.4	WBGene00003845	odd-1	odd-1 encodes a C2H2-type zinc finger-containing transcription Concise description: odd-1 encodes a C2H2-type zinc finger-containing transcription factor similar to Drosophila odd skipped which is required for embryonic patterning; ODD-1 is expressed in the gut during embryogenesis and appears to be essential for	Drosophila ODD-skipped-like
B0280.5	WBGene00015102	cpg-2	cpg-2 encodes a chondroitin proteoglycan with six chitin-binding Concise description: cpg-2 encodes a chondroitin proteoglycan with six chitin-binding peritrophin-A domains and three mucin-like regions; CPG-2 is individually dispensable for normal embryonic development; however, CPG-2 and CPG-1 are jointly required for osmotic integrity of early embryos, error-free chromosomal segregation during …	Chondroitin ProteoGlycan
B0280.7	WBGene00015103	B0280.7	none available	not known
B0281.3	WBGene00015110	B0281.3	none available	not known
B0281.5	WBGene00015112	B0281.5	none available	not known
B0281.6	WBGene00015113	B0281.6	none available	not known
B0284.1	WBGene00007131	pals-26	none available	Protein containing ALS2cr12 (ALS2CR12) signature
B0284.5	WBGene00045188	B0284.5	none available	not known
B0285.7	WBGene00007139	mnp-1	mnp-1 encodes a protein related to the M1 family of metalloproteinases, Concise description: mnp-1 encodes a protein related to the M1 family of metalloproteinases, but whose sequence indicates that it is unlikely to be catalytically active (MNP-1 lacks three of the four essential zinc-binding amino acids); during embryonic development mnp-1 activity is required, likely cell autonomously, for mig…	Matrix Non-Peptidase homolog
B0285.8	WBGene00000511	ckb-1	ckb-1 encodes a putative choline kinase; CKB-1 through CKB-4 Concise description: ckb-1 encodes a putative choline kinase; CKB-1 through CKB-4	Choline Kinase B
B0294.1	WBGene00015117	B0294.1	none available	not known
B0303.7	WBGene00015128	B0303.7	none available	not known
B0304.1	WBGene00001948	hlh-1	hlh-1 encodes a basic helix-loop-helix (bHLH) transcription Concise description: hlh-1 encodes a basic helix-loop-helix (bHLH) transcription factor that is the C. elegans ortholog of the myogenic regulatory factor (MRF) subgroup of bHLH proteins; in C. elegans, HLH-1 activity is required during embryogenesis for proper bodywall muscle development and function, but not for bodywall muscle cell fat…	Helix Loop Helix
B0304.2	WBGene00015134	B0304.2	none available	not known
B0304.3	WBGene00015135	cyp-23A1	cyp-23A1 encodes a cytochrome P450 homologous to the human Concise description: cyp-23A1 encodes a cytochrome P450 homologous to the human gene CYP7B1, which when mutated leads to giant cell hepatitis (OMIM:231100); as a cytochrome P450, CYP-23A1 is predicted to function as a membrane-associated, heme-containing NADPH-dependent monooxygenases that catalyzes the oxidative metabolism of a variety	CYtochrome P450 family
B0310.2	WBGene00015138	B0310.2	none available	not known
B0310.3	WBGene00015139	B0310.3	none available	not known
B0310.5	WBGene00015141	ugt-46	none available	UDP-GlucuronosylTransferase
B0331.2	WBGene00007141	pitr-4	none available	PIT (mammalian phosphate transporter) Related
B0334.13	WBGene00007149	B0334.13	none available	not known
B0336.11	WBGene00015148	hpo-28	none available	Hypersensitive to POre-forming toxin
B0336.13	WBGene00015150	B0336.13	none available	not known
B0336.5	WBGene00015145	arle-14	none available	Adp (ADP) Ribosylation factor Like gtpase (GTPase) 14 Effector Gene class description: Adp (ADP) Ribosylation factor Like gtpase (GTPase) 14 Effector
B0336.6	WBGene00015146	abi-1	abi-1 encodes an Abl interactor orthologous to human SSH3BP1 Concise description: abi-1 encodes an Abl interactor orthologous to human SSH3BP1 (ABI1; OMIM:603050, mutated in acute myeloid leukemia), ABI-2 (OMIM:606442), and NESH (OMIM:606363); abi-1 is required for epidermal cell migrations during embryonic enclosure, proper migration of the excretory cell, distal tip cell, and mechanosensory and…	ABl Interactor homolog
B0336.7	WBGene00015147	B0336.7	B0336.7 encodes, by alternative splicing, two isoforms of a Concise description: B0336.7 encodes, by alternative splicing, two isoforms of a protein with a THAP or THAP-like domain; other proteins with such domains include LIN-15A, LIN-15B, LIN-36, and HIM-17 (which all interact with LIN-35/Rb), as well as CDC-14B, CTB-1, GON-14, and ~100 other proteins such as Drosophila P element transposase an…	not known
B0344.2	WBGene00006955	wrt-9	wrt-9 encodes a hedgehog-like protein, with an N-terminal signal Concise description: wrt-9 encodes a hedgehog-like protein, with an N-terminal signal sequence, a Wart domain, and a C-terminal region of proline-rich, low-complexity sequence; the Wart domain is predicted to form a cysteine-crosslinked protein involved in intercellular signalling, and it has subtle similarity to the N-terminal Hedge	WaRThog (hedgehog-like family)
B0348.2	WBGene00015152	B0348.2	none available	not known
B0348.5	WBGene00015153	B0348.5	none available	not known
B0348.6	WBGene00002061	ife-3	ife-3 encodes one of five C. elegans homologs of the mRNA cap-binding Concise description: ife-3 encodes one of five C. elegans homologs of the mRNA cap-binding protein eIF4E; by homology, IFE-3 is predicted to bind capped mRNA and mediate its recruitment to ribosomes during translation initiation; in vitro, IFE-3 binds a monomethylated guanosine cap structure but does not bind a trimethylated gu…	Initiation Factor 4E (eIF4E) family
B0361.4	WBGene00015158	B0361.4	none available	not known
B0361.9	WBGene00015163	B0361.9	none available	not known
B0379.7	WBGene00007159	B0379.7	none available	not known
B0391.10	WBGene00007165	B0391.10	none available	not known
B0391.8	WBGene00014643	B0391.8	none available	not known
B0393.14	WBGene00197966	B0393.14	none available	not known
B0393.2	WBGene00007167	rbg-3	rbg-3 encodes a predicted TBC domain-containing RabGTPase-activating Concise description: rbg-3 encodes a predicted TBC domain-containing RabGTPase-activating protein (RabGAP) similar to the Ypt/Rab specific GTPase-activating protein gyp6; YPT/Rab GTPases and GAPs regulate eukaryotic vesicular transport; RBG-3 functions as a GTPase for both human and elegans RAB-7; rbg-3 interacts with tub-1/Tubb…	RaB GAP related
B0393.3	WBGene00007168	B0393.3	none available	not known
B0393.4	WBGene00007169	B0393.4	none available	not known
B0393.5	WBGene00007170	B0393.5	none available	not known
B0393.6	WBGene00007171	B0393.6	none available	not known
B0395.2	WBGene00007174	mboa-1	mboa-1 encodes a putative acyl-Coenzyme A:cholesterol ('sterol') Concise description: mboa-1 encodes a putative acyl-Coenzyme A:cholesterol ('sterol') O-acyltransferase, orthologous to human SOAT1 (OMIM:102642); MBOA-1 is required for normal locomotion and normally long lifespan in mass RNAi assays; mboa-1 is expressed in the seam cells and nervous systems of larvae and adults, and in the	Membrane Bound O-Acyl transferase, MBOAT
B0410.2	WBGene00015171	vang-1	vang-1 encodes an ortholog of Drosophila STRABISMUS/VAN GOGH; Concise description: vang-1 encodes an ortholog of Drosophila STRABISMUS/VAN GOGH; vang-1 enables Wnt-directed planar cell polarity; VANG-1 is required for the fully asymmetrical division of B.a versus B.p cells, though this requirement is quantitatively weak; vang-1 also negatively regulates adult lifespan via the DAF-2/IGFR insulin s…	VANG (Van Gogh/Strabismus planar polarity protein) homolog
B0412.1	WBGene00000895	dac-1	dac-1 encodes the C. elegans ortholog of Dachshund, a transcriptional Concise description: dac-1 encodes the C. elegans ortholog of Dachshund, a transcriptional regulator first described in Drosophila that is a member of the SKI/SNO/DAC family of proteins; dac-1 is expressed at higher levels in the AFD thermosensory neurons as compared to the AWB olfactory neurons and likely plays a role in therm…	DAChsund transcription factor homolog
B0412.2	WBGene00000903	daf-7	daf-7 encodes a member of the transforming growth factor beta Concise description: daf-7 encodes a member of the transforming growth factor beta superfamily; in C. elegans, DAF-7 functions as part of a signaling pathway that interprets environmental conditions to regulate energy-balance pathways that affect dauer larval formation, adult lifespan, fat metabolism, egg laying, pathogen avoidance beh…	abnormal DAuer Formation
B0414.3	WBGene00001856	hil-5	none available	HIstone H1 Like
B0414.5	WBGene00000772	cpb-3	cpb-3 encodes a CPEB orthologous to Drosophila ORB, zebrafish Concise description: cpb-3 encodes a CPEB orthologous to Drosophila ORB, zebrafish ZORBA, and human CPEB1, and paralogous to FOG-1 and CPB-1/2; CPB-3 inhibits physiological apoptosis in oocytes, keeping it down to a normal level of ~50% in hermaphrodite gonads; independently of apoptosis, CPB-3 is also required for normal oogenesis, sp…	CPEB polyA binding family
B0414.6	WBGene00001600	glh-3	glh-3 encodes a predicted DEAD-like RNA helicase; GLH-3 interacts Concise description: glh-3 encodes a predicted DEAD-like RNA helicase; GLH-3 interacts with itself and with CSN-5, KGB-1, ZYX-1, and GLH-1 in vitro, and is expressed in	Germ Line Helicase
B0416.11	WBGene00206483	B0416.11	none available	not known
B0416.4	WBGene00015180	B0416.4	none available	not known
B0432.11	WBGene00015192	B0432.11	none available	not known
B0432.13	WBGene00015194	B0432.13	none available	not known
B0432.14	WBGene00044640	B0432.14	none available	not known
B0432.7	WBGene00015188	B0432.7	none available	not known
B0432.8	WBGene00015189	B0432.8	none available	not known
B0454.8	WBGene00015199	B0454.8	none available	not known
B0462.5	WBGene00194695	B0462.5	none available	not known
B0464.8	WBGene00007187	tag-342	none available	Temporarily Assigned Gene name
B0464.9	WBGene00007188	B0464.9	none available	not known
B0478.1	WBGene00002178	jnk-1	jnk-1 encodes a serine/threonine kinase that is the sole C. Concise description: jnk-1 encodes a serine/threonine kinase that is the sole C. elegans member of the c-Jun N-terminal kinase (JNK) subgroup of mitogen-activated protein (MAP) kinases; jnk-1 is required for normal coordinated locomotion as well as for normal adult lifespan and response to heat and oxidative stress; JNK-1 exhibits kinase…	Jun N-terminal Kinase
B0491.2	WBGene00005016	sqt-1	sqt-1 encodes a cuticle collagen; during larval and adult development, Concise description: sqt-1 encodes a cuticle collagen; during larval and adult development, sqt-1 activity is required, likely redundantly, for normal cuticle, and hence organismal, morphology; sqt-1 mRNA abundance oscillates during larval development, peaking at one point during each larval stage and peaking again in adults; …	SQuaT
B0491.3	WBGene00007190	rmd-3	none available	Regulator of Microtubule Dynamics
B0491.4	WBGene00007191	lgc-20	none available	Ligand-Gated ion Channel
B0491.6	WBGene00007193	B0491.6	none available	not known
B0491.8	WBGene00000529	clh-2	clh-2 encodes a chloride channel protein that is required for Concise description: clh-2 encodes a chloride channel protein that is required for embryonic viability; may have two transcripts transcribed from alternative promoters,	CLC-type chloride cHannel
B0495.2	WBGene00015203	cdk-11.1	none available	Cyclin-Dependent Kinase family
B0495.8	WBGene00015207	B0495.8	none available	not known
B0496.1	WBGene00015210	B0496.1	none available	not known
B0496.11	WBGene00194883	B0496.11	none available	not known
B0507.6	WBGene00015223	B0507.6	none available	not known
B0507.8	WBGene00015225	B0507.8	none available	not known
B0511.10	WBGene00001228	eif-3.E	eif-3.E encodes the C. elegans ortholog of the translation Concise description: eif-3.E encodes the C. elegans ortholog of the translation initiation factor 3 subunit e (eIF3e/Int-6); by homology, EIF-3.E is predicted to be a component of three different protein complexes, the eIF3 translation initiation factor, the 26S proteasome, and the COP9 signalosome; such association suggests that EIF-3.E …	Eukaryotic Initiation Factor
B0511.19	WBGene00255714	B0511.19	none available	not known
B0511.2	WBGene00015228	B0511.2	none available	not known
B0511.4	WBGene00015230	tag-344	none available	Temporarily Assigned Gene name
B0511.5	WBGene00015231	cutl-14	none available	CUTiclin-Like
B0511.7	WBGene00015233	B0511.7	none available	not known
B0511.9	WBGene00015235	cdc-26	cdc-26 encodes, by alternative splicing, two isoforms of a Concise description: cdc-26 encodes, by alternative splicing, two isoforms of a probable anaphase-promoting complex/cyclosome (APC/C) component that has cryptic orthology to budding yeast Cdc26p, and that is required for normal meiosis and asymmetric one-cell embryonic division; although CDC-26 and Cdc26p have little obvious sequence simi…	Cell Division Cycle related
B0513.2	WBGene00007195	thoc-7	B0513.2 encodes the C. elegans ortholog of mammalian THOC7, Concise description: B0513.2 encodes the C. elegans ortholog of mammalian THOC7, a subunit of the THO complex involved in mRNP biogenesis as part of transcription	THO Complex (transcription factor/nuclear export) subunit
B0513.4	WBGene00007196	B0513.4	none available	not known
B0523.1	WBGene00002212	kin-31	kin-31 encodes a predicted tyrosine protein kinase expressed Concise description: kin-31 encodes a predicted tyrosine protein kinase expressed in the nucleus and cytoplasm of body-wall muscle cells; the expression of kin-31	protein KINase
B0523.3	WBGene00003993	pgl-2	pgl-2 encodes a novel protein of 532 amino acids that, in C. Concise description: pgl-2 encodes a novel protein of 532 amino acids that, in C. elegans, is one of three PGL protein family members; PGL-2 associates with P granules during postembryonic development; PGL-2 interacts with PGL-1, an additional P granule component, in yeast two-hybrid assays, but neither protein is required for proper	P-GranuLe abnormality
B0524.2	WBGene00015241	B0524.2	none available	not known
B0524.5	WBGene00015244	B0524.5	none available	not known
B0545.1	WBGene00006599	tpa-1	tpa-1 encodes two protein kinase C isoforms, TPA-1A and TPA-1B; Concise description: tpa-1 encodes two protein kinase C isoforms, TPA-1A and TPA-1B; analysis of tpa-1 mutations indicates that at least one TPA-1 isoform plays a role in nicotine-induced adaptation and that both isoforms appear to play a role in gpa-12/G	TPA (tetradecanoyl phorbol acetate) resistant
B0545.4	WBGene00015247	B0545.4	none available	not known
B0547.3	WBGene00005092	srd-14	none available	Serpentine Receptor, class D (delta)
B0554.5	WBGene00015258	B0554.5	none available	not known
B0554.7	WBGene00015260	B0554.7	none available	not known
B0563.7	WBGene00015264	B0563.7	none available	not known
B0563.9	WBGene00044687	B0563.9	none available	not known
B0564.1	WBGene00044083	tin-9.2	tin-9.2 encodes two disjoint protein products from a dicistronic Concise description: tin-9.2 encodes two disjoint protein products from a dicistronic mRNA: 1) one of two C. elegans members of the Tin9 family of mitochondrial import proteins and, 2) a predicted Rrp41 subunit of the exosomal 3'-5' exoribonuclease complex (B0564.1); TIN-9.2 is required for normal fertility, body size, time of repro…	Transport to INner mitochondrial membrane (yeast TIM)
B0564.10	WBGene00006766	unc-30	unc-30 encodes a homeodomain-containing protein that is orthologous Concise description: unc-30 encodes a homeodomain-containing protein that is orthologous to the Pitx family of homeodomain transcription factors; during develpoment, UNC-30 controls the terminal differentiation of all 19 type D GABA-ergic motor neurons by directly regulating the expression of UNC-25/GAD and UNC-47/VGAT, which reg…	UNCoordinated
B0564.2	WBGene00007202	B0564.2	none available	not known
B0564.3	WBGene00007203	best-1	none available	BESTrophin (chloride channel) homolog
B0564.4	WBGene00007204	best-2	none available	BESTrophin (chloride channel) homolog
BE0003N10.1	WBGene00015266	BE0003N10.1	none available	not known
BE0003N10.2	WBGene00015267	chin-1	chin-1 encodes a putative GTPase activating protein (GAP) and Concise description: chin-1 encodes a putative GTPase activating protein (GAP) and is orthologous to vertebrate chimaerins; chin-1 negatively regulates CDC-42 during asymmetric division in the embryo; chin-1 restricts both the spatial extent of CDC-42 expression and the recruitment of NMY-2 during the phase in which polarity is maintai…	CHImaeriN (Rac-GTPase-activating protein) homolog
BE10.2	WBGene00007210	agmo-1	none available	AlkylGlycerol MonoOxygenase
BE10.5	WBGene00044127	BE10.5	none available	not known
C01A2.1	WBGene00007213	C01A2.1	none available	not known
C01A2.3	WBGene00007215	oxa-1	none available	OXA mitochondrial inner membrane insertase homolog
C01A2.7	WBGene00007219	nlp-38	none available	Neuropeptide-Like Protein
C01B10.44	WBGene00194839	C01B10.44	none available	not known
C01B10.5	WBGene00001858	hil-7	hil-7 encodes an H1 linker histone.	HIstone H1 Like
C01B10.6	WBGene00015280	C01B10.6	none available	not known
C01B10.7	WBGene00015281	C01B10.7	none available	not known
C01B12.5	WBGene00015288	best-4	none available	BESTrophin (chloride channel) homolog
C01B12.8	WBGene00015291	C01B12.8	none available	not known
C01B7.4	WBGene00006467	magu-2	magu-2 encodes a protein with similarity to the MAGUK (membrane-associated Concise description: magu-2 encodes a protein with similarity to the MAGUK (membrane-associated guanylate kinase) family of proteins; loss of magu-2 activity in large-scale RNAi screens can result in embryonic lethality with low, reproducible chromosome segregation	MAGUK family
C01B7.6	WBGene00004457	rpm-1	rpm-1 encodes an E3 ubiquitin ligase that contains an N-terminal Concise description: rpm-1 encodes an E3 ubiquitin ligase that contains an N-terminal RCC1 (regulator of chromosome condensation)-like guanine nucleotide exchange factor (GEF) domain and that is orthologous to Drosophila highwire and murine Phr1; RPM-1 functions autonomously within several different types of neurons to regulate pres…	Regulator of Presynaptic Morphology
C01C10.1	WBGene00000523	clc-2	clc-2 encodes a claudin homolog, closely similar to CLC-1, Concise description: clc-2 encodes a claudin homolog, closely similar to CLC-1, that is required for normal cohesion of apical junctions in epithelia; claudins are integral membrane proteins with four transmembrane sequences that are found in mammalian tight junctions (TJs), induce TJs when transgenically expressed in cells normally lacki…	CLaudin-like in Caenorhabditis
C01C10.4	WBGene00000526	clc-5	clc-5 encodes a claudin homolog that may be required for normal Concise description: clc-5 encodes a claudin homolog that may be required for normal cohesion of apical junctions in epithelia; CLC-5 is worm-specific, with obvious homologs only in C. elegans; CLC-5 has no obvious function in mass RNAi assays; claudins are integral membrane proteins with four transmembrane sequences that are found i…	CLaudin-like in Caenorhabditis
C01C4.1	WBGene00003739	nlp-1	nlp-1 encodes a predicted neuropeptide-like protein of the Concise description: nlp-1 encodes a predicted neuropeptide-like protein of the MSFamide family with similarity to Aplysia californica (sea hare) buccalin, a neuropeptide that regulates acetylcholine-induced muscle contraction; NLP-1 is expressed in the phasmid PHB tail sensory neuron, lateral neurons, head neurons, and the intestine; the…	Neuropeptide-Like Protein
C01C4.3	WBGene00015293	C01C4.3	C01C4.3 encodes a serine/threonine protein kinase.	not known
C01F1.5	WBGene00015300	C01F1.5	none available	not known
C01F4.2	WBGene00015303	rga-6	none available	Rho GTPase Activating protein
C01F6.1	WBGene00007221	cpna-3	cpna-3 encodes a putative calcium-dependent phospholipid binding Concise description: cpna-3 encodes a putative calcium-dependent phospholipid binding protein of the copine family; cpna-3 is required for sperm to normally migrate towards a PUFA-based signal exuded by oocytes; cpna-3(RNAi) hermaphrodites are infertile, both through aberrant loss of their own sperm and through failure of males to e…	CoPiNe domain protein, Atypical
C01F6.2	WBGene00007222	C01F6.2	none available	not known
C01F6.4	WBGene00001413	fem-3	fem-3 encodes a novel protein that promotes male development Concise description: fem-3 encodes a novel protein that promotes male development	FEMinization of XX and XO animals
C01F6.5	WBGene00000120	aly-1	aly-1 encodes an RRM motif-containing protein required for Concise description: aly-1 encodes an RRM motif-containing protein required for normal export of TRA-1/tra-2 mRNA complexes, and thus for normal hermaphroditism; ALY-1 is orthologous to human THOC4 (OMIM:604171), and paralogous to ALY-2 and ALY-3; in the absence of TRA-1, and in conjunction with NXF-2, ALY-1 and its paralog ALY-2 are requ…	Ref/ALY RNA export adaptor family
C01F6.9	WBGene00007223	C01F6.9	The C01F6.9 gene resides in an operon that also contains the Concise description: The C01F6.9 gene resides in an operon that also contains the	not known
C01G10.10	WBGene00007237	C01G10.10	none available	not known
C01G10.14	WBGene00007239	C01G10.14	none available	not known
C01G10.15	WBGene00007240	C01G10.15	none available	not known
C01G10.5	WBGene00007232	C01G10.5	none available	not known
C01G10.6	WBGene00007233	C01G10.6	C01G10.6 encodes a predicted secreted or transmembrane protein Concise description: C01G10.6 encodes a predicted secreted or transmembrane protein that is rich in asparagine and tyrosine residues and which displays some similarity to the Staphylococcal secretory antigen ssaA2 precursor and Saccharomyces cerevisiae	not known
C01G12.11	WBGene00007251	nspb-9	none available	Nematode Specific Peptide family, group B
C01G12.6	WBGene00007246	nspb-10	none available	Nematode Specific Peptide family, group B
C01G12.7	WBGene00007247	C01G12.7	none available	not known
C01G12.8	WBGene00007248	catp-4	none available	Cation transporting ATPase
C01G5.2	WBGene00004179	prg-2	prg-2 encodes a novel, basic protein that is one of two C. Concise description: prg-2 encodes a novel, basic protein that is one of two C.	Piwi (fruitfly) Related Gene
C01G5.25	WBGene00235291	C01G5.25	none available	not known
C01G5.4	WBGene00015306	C01G5.4	none available	not known
C01G5.5	WBGene00015307	C01G5.5	none available	not known
C01G5.7	WBGene00015309	C01G5.7	none available	not known
C01G5.8	WBGene00015310	fan-1	none available	Fanconi Anemia-associated Nuclease
C01G6.1	WBGene00000170	aqp-2	aqp-2 encodes, by alternative splicing, two isoforms of an Concise description: aqp-2 encodes, by alternative splicing, two isoforms of an biochemically atypical aquaglyceroporin; when expressed in Xenopus oocytes, AQP-2 increases water permeability 5- to 11-fold, and urea permeability 4.5-fold, but has no effect on glycerol permeability; AQP-2::GFP fusion proteins are expressed predominantly in …	AQuaPorin or aquaglyceroporin related
C01G6.10	WBGene00014663	C01G6.10	none available	not known
C01G6.3	WBGene00007225	C01G6.3	none available	not known
C01G6.7	WBGene00007228	acs-7	none available	fatty Acid CoA Synthetase family
C01G8.1	WBGene00015312	C01G8.1	none available	not known
C01G8.6	WBGene00015313	hpo-32	none available	Hypersensitive to POre-forming toxin
C01H6.1	WBGene00000637	col-61	none available	COLlagen
C01H6.3	WBGene00007253	C01H6.3	none available	not known
C01H6.6	WBGene00007255	cnnm-4	C01H6.6 encodes a predicted transmembrane protein orthologous Concise description: C01H6.6 encodes a predicted transmembrane protein orthologous to human ACDP1-ACDP4 and S. cerevisiae MAM3, and paralogous to C33D12.2, C52D10.12, M02F4.3, R04E5.2, and R13G10.4; by orthology with MAM3, C01H6.6 may participate in metal homoeostasis; C01H6.6, MAM3, and ACDP1-ACDP4 belong to a family of proteins (shar…	vertebrate CNNM family homolog
C01H6.9	WBGene00007258	hasp-1	hasp-1 encodes a homolog of vertebrate haploid germ cell-specific Concise description: hasp-1 encodes a homolog of vertebrate haploid germ cell-specific nuclear protein kinase (haspin); the hasp-1 tm3858 deletion mutation has been classified as lethal or sterile by the National Bioresource Project of Japan; HASP-1 specifically binds GOA-1 in yeast two-hybrid assays; HASP-1 is expressed in PHB sen…	HASPin kinase related
C02A12.4	WBGene00003096	lys-7	lys-7 encodes an enzyme homologous to an antimicrobial lysozyme Concise description: lys-7 encodes an enzyme homologous to an antimicrobial lysozyme encoded by the LYS4 gene of the protozoan parasite Entamoeba histolytica; LYS-7 functions in the innate immune response as an antimicrobial enzyme that, by homology, hydrolyzes the 1,4-beta-linkages between N-acetyl-D-glucosamine and N-acetylmuramic …	LYSozyme
C02B10.1	WBGene00015326	ivd-1	ivd-1 encodes an isovaleryl-CoA dehydrogenase; this function Concise description: ivd-1 encodes an isovaleryl-CoA dehydrogenase; this function	IsoValeryl-CoA Dehydrogenase
C02B10.2	WBGene00015327	snpn-1	none available	SNaPiN (synaptic protein) homolog
C02B4.4	WBGene00045386	nlp-76	none available	Neuropeptide-Like Protein
C02B8.3	WBGene00015322	C02B8.3	none available	not known
C02B8.4	WBGene00001953	hlh-8	The hlh-8 gene encodes a helix-loop-helix protein required Concise description: The hlh-8 gene encodes a helix-loop-helix protein required	Helix Loop Helix
C02C2.4	WBGene00015333	slc-17.3	none available	SLC (SoLute Carrier) homolog
C02D4.1	WBGene00007262	jud-4	jud-4 encodes an unfamiliar protein, putatively secreted, that Concise description: jud-4 encodes an unfamiliar protein, putatively secreted, that is required both for normal sensitivity to ethanol and for survival after freezing and thawing; JUD-4 is expressed in hypodermis and vulval muscles; JUD-4 is orthologous to Brugia malayi Bm1_40315, but lacks obvious orthologies to non-nematode proteins…	JUDang (Korean for resistant to alcohol)
C02D4.2	WBGene00004777	ser-2	ser-2 encodes at least four tyramine 7-transmembrane domain Concise description: ser-2 encodes at least four tyramine 7-transmembrane domain receptors (GPCRs), by alternative splicing from three different promoters, that have distinct but partially overlapping expression patterns; ser-2 has at least three alternative promoters that drive SER-2 expression in a set of sensory, inter- and motor neur…	SERotonin/octopamine receptor family
C02D5.2	WBGene00015336	C02D5.2	none available	not known
C02D5.3	WBGene00015337	gsto-2	C02D5.3 is predicted to encode, by alternative splicing and Concise description: C02D5.3 is predicted to encode, by alternative splicing and an internal promoter, three partially non-overlapping putative omega-class glutathione transferases (GST; EC 2.5.1.18) which, like their paralog GSTO-1, might have thiol oxidoreductase and dehydroascorbate reductase activity; other C02D5.3 paralogs	Glutathione S-Transferase, Omega class
C02E7.3	WBGene00005245	srh-20	none available	Serpentine Receptor, class H
C02F12.1	WBGene00006643	tsp-17	none available	TetraSPanin family
C02F12.3	WBGene00015354	snet-1	none available	snet (Suppressor of NEp Two)
C02F12.5	WBGene00015355	C02F12.5	C02F12.5 encodes a putatively secreted protein with a Kunitz/bovine Concise description: C02F12.5 encodes a putatively secreted protein with a Kunitz/bovine pancreatic trypsin inhibitor domain; C02F12.5 has no obvious function in mass	not known
C02F12.7	WBGene00015356	tag-278	none available	Temporarily Assigned Gene name
C02F4.4	WBGene00007264	C02F4.4	none available	not known
C02F5.10	WBGene00015351	C02F5.10	none available	not known
C02F5.2	WBGene00015345	C02F5.2	none available	not known
C02F5.4	WBGene00015347	cids-1	cids-1 encodes a protein that contains a CTD (C-terminal domain Concise description: cids-1 encodes a protein that contains a CTD (C-terminal domain of RNA Pol II)-interacting domain and that is orthologous to Saccharomyces cerevisiae RTT103; cids-1 was identified genetically as a suppressor of the SynMuv phenotype produced by lin-15AB(n765), a mutation that results in transposition of the 3'-end…	pol II C-terminal Interaction Domain Suppressor
C02F5.5	WBGene00015348	C02F5.5	none available	not known
C02F5.9	WBGene00003952	pbs-6	The pbs-6 gene encodes a homolog of mammalian PSMB1.	Proteasome Beta Subunit
C03A3.9	WBGene00284849	C03A3.9	none available	not known
C03A7.10	WBGene00015368	srt-65	none available	Serpentine Receptor, class T
C03B1.2	WBGene00015373	C03B1.2	none available	not known
C03B1.5	WBGene00015376	C03B1.5	none available	not known
C03B8.2	WBGene00015385	C03B8.2	none available	not known
C03C10.2	WBGene00007269	C03C10.2	none available	not known
C03C10.3	WBGene00004392	rnr-2	rnr-2 encodes the small subunit of ribonucleotide reductase; Concise description: rnr-2 encodes the small subunit of ribonucleotide reductase; by homology, RNR-2 is predicted to function in deoxyribonucleotide biosynthesis; in C. elegans rnr-2 is an essential gene whose activity is required for reproduction	RiboNucleotide Reductase
C03C11.1	WBGene00007274	C03C11.1	none available	not known
C03C11.2	WBGene00001483	fog-3	fog-3 encodes a protein that has similarity, in its N-terminus, Concise description: fog-3 encodes a protein that has similarity, in its N-terminus, to the vertebrate Tob, BTG1, and BTG2 proteins that function in growth control and/or differentiation; in C. elegans, FOG-3 activity is required in the germ line throughout development for initiation and maintenance of spermatogenesis; fog-3 mRNA is …	Feminization Of Germline
C03D6.6	WBGene00007278	lab-1	lab-1 encodes a protein containing a motif associated with Concise description: lab-1 encodes a protein containing a motif associated with binding, localization, and function of protein phosphatase 1 (PP1/Glc7); LAB-1 activity is required for establishment and maintenance of sister chromatid cohesion during meiosis; LAB-1 physically interacts with the protein phosphatases GSP-1 and GSP-2 and posi…	Long Arms of the Bivalent protein
C03D6.9	WBGene00219796	C03D6.9	none available	not known
C03E10.3	WBGene00007281	C03E10.3	none available	not known
C03E10.5	WBGene00007282	clec-223	none available	C-type LECtin
C03F11.1	WBGene00015387	kcnl-3	none available	KCNN (potassium K ChaNNel, calcium activated)-Like
C03F11.3	WBGene00015389	scav-1	none available	SCAVenger receptor (CD36 family) related
C03G5.10	WBGene00044338	nspc-3	none available	Nematode Specific Peptide family, group C
C03G5.11	WBGene00044339	nspc-4	none available	Nematode Specific Peptide family, group C
C03G5.12	WBGene00044340	nspc-5	none available	Nematode Specific Peptide family, group C
C03G5.2	WBGene00015392	nspc-7	none available	Nematode Specific Peptide family, group C
C03G5.7	WBGene00001448	flp-5	flp-5 encodes a predicted FMRFamide-like peptide neurotransmitter Concise description: flp-5 encodes a predicted FMRFamide-like peptide neurotransmitter that increases action potential frequency in the pharyngeal muscle when applied	FMRF-Like Peptide
C03G5.8	WBGene00023477	nspc-1	none available	Nematode Specific Peptide family, group C
C03G6.13	WBGene00015398	tag-293	none available	Temporarily Assigned Gene name
C03G6.14	WBGene00015399	cyp-35A1	cyp-35A1 encodes one of over 80 C. elegans cytochrome P450s, Concise description: cyp-35A1 encodes one of over 80 C. elegans cytochrome P450s, NADPH-dependent monooxygenases that metabolize endogenous and exogenous compounds; RT-PCR experiments indicate that cyp-35A1 mRNA is upregulated in response to treatment with xenobiotics, such as PCBs (polychlorinated biphenyls) or PAHs (polycyclic aromati…	CYtochrome P450 family
C03G6.17	WBGene00015402	C03G6.17	none available	not known
C03G6.5	WBGene00015393	C03G6.5	none available	not known
C03G6.8	WBGene00015395	nhr-147	none available	Nuclear Hormone Receptor family
C03H5.1	WBGene00015403	clec-10	none available	C-type LECtin
C03H5.6	WBGene00015408	C03H5.6	none available	not known
C04A11.1	WBGene00007285	C04A11.1	none available	not known
C04A11.5	WBGene00007288	C04A11.5	none available	not known
C04A2.15	WBGene00206529	C04A2.15	none available	not known
C04A2.3	WBGene00001194	egl-27	egl-27 encodes, along with lin-40, one of two C. elegans homologs Concise description: egl-27 encodes, along with lin-40, one of two C. elegans homologs of human MTA1 (metastasis-associated protein), part of a nucleosome remodeling and histone deacetylation (NURD) complex; in conjunction with its paralog egr-1, egl-27 is required for proper organization in all parts of the embryo, and for the emb…	EGg Laying defective
C04B4.2	WBGene00007290	C04B4.2	none available	not known
C04C3.9	WBGene00195067	C04C3.9	none available	not known
C04E12.11	WBGene00015440	arrd-20	none available	ARRestin Domain protein
C04E12.12	WBGene00015441	arrd-21	none available	ARRestin Domain protein
C04E12.5	WBGene00015435	C04E12.5	none available	not known
C04E6.11	WBGene00015425	C04E6.11	none available	not known
C04E6.12	WBGene00015426	C04E6.12	none available	not known
C04E6.13	WBGene00015427	C04E6.13	none available	not known
C04E6.4	WBGene00015421	C04E6.4	none available	not known
C04F1.1	WBGene00015442	C04F1.1	none available	not known
C04F1.3	WBGene00002989	lim-7	lim-7 encodes one of seven C. elegans LIM-homeodomain (LIM-HD) Concise description: lim-7 encodes one of seven C. elegans LIM-homeodomain (LIM-HD) proteins and the sole C. elegans member of the Islet subclass of LIM-HD transcription factors; loss of lim-7 activity results in L1 larval lethality characterized by locomotion and morphological defects, a detached pharynx, body cavity vacuolization, a…	LIM domain family
C04F12.3	WBGene00002069	ikb-1	ikb-1 encodes an ortholog of human BCL3 (OMIM:109560) that Concise description: ikb-1 encodes an ortholog of human BCL3 (OMIM:109560) that physically interacts with the checkpoint protein MRT-2; ikb-1(nr2019) and ikb-1(nr2027) mutants display no obvious phenotype other than shortened lifespan; mutation of BCL3 is frequently associated with recurring translocations found in the neoplastic cells of…	I Kappa B homolog
C04F12.7	WBGene00007301	C04F12.7	none available	not known
C04F5.1	WBGene00004795	sid-1	sid-1 encodes a dsRNA channel with conserved human (OMIM:606816) Concise description: sid-1 encodes a dsRNA channel with conserved human (OMIM:606816) and mouse homologs; SID-1 functions to enable passive (ATP-independent) uptake of double-stranded RNA (dsRNA) and is required cell autonomously for systemic RNA interference (RNAi) and for efficient reduction of multicopy transgene expression (repe…	Systemic RNA Interference Defective
C04F5.3	WBGene00006782	unc-46	unc-46 encodes a type I transmembrane protein that contains Concise description: unc-46 encodes a type I transmembrane protein that contains a single motif similar to the LAMP (lysosomal associated membrane glycoprotein) domain; UNC-46 and UNC-47, the C. elegans vesicular GABA transporter, are required in GABAergic neurons for loading GABA into synaptic vesicles and thus, for all GABA-mediated be…	UNCoordinated
C04F5.7	WBGene00015449	ugt-63	none available	UDP-GlucuronosylTransferase
C04F6.1	WBGene00006929	vit-5	vit-5 encodes a vitellogenin, a lipid-binding protein precursor Concise description: vit-5 encodes a vitellogenin, a lipid-binding protein precursor related to vertebrate vitellogenins and mammalian ApoB-100, a core LDL particle constituent; by homology, VIT-5 is predicted to function as a lipid transport protein; loss of vit-5 activity via large-scale RNA-mediated interference (RNAi) screens ind…	VITellogenin structural genes (yolk protein genes)
C04F6.7	WBGene00195081	C04F6.7	none available	not known
C04G2.1	WBGene00007304	ttr-39	none available	TransThyretin-Related family domain
C04G2.2	WBGene00007305	ttbk-5	none available	Tau TuBulin Kinase
C04G2.3	WBGene00014665	C04G2.3	none available	not known
C04G2.4	WBGene00003432	msp-36	msp-36 encodes a protein that belongs to a family of proteins Concise description: msp-36 encodes a protein that belongs to a family of proteins called the Major Sperm Proteins (MSPs) that is conserved in nematodes; this family comprises of closely related, small, basic proteins that make up 15% of sperm protein; this multigene family consists of over fifty genes, including many pseudogenes; MSP …	Major Sperm Protein
C04G2.5	WBGene00007306	C04G2.5	none available	not known
C04G2.7	WBGene00001204	egl-38	egl-38 encodes a paired domain-containing protein that is a Concise description: egl-38 encodes a paired domain-containing protein that is a member of the PAX2/5/8 family of transcription factors; egl-38 is an essential gene, required for embryonic and larval development; in addition, EGL-38 activity is also required for fate specification of four uterine cells and rectal epithelial cells in the …	EGg Laying defective
C04G2.8	WBGene00007307	spch-1	spch-1 encodes one of three C. elegans small, highly basic Concise description: spch-1 encodes one of three C. elegans small, highly basic proteins that have similarity to mouse testis-specific histone H1, the human nucleotide binding and splicing-associated protein SON, and the mollusk protamine-like SNBPs (sperm nuclear basic proteins); spch-1(RNAi) has been reported to result in low penetrance…	SPerm CHromatin enriched
C04G2.9	WBGene00007308	C04G2.9	none available	not known
C04G6.10	WBGene00015458	C04G6.10	none available	not known
C04G6.5	WBGene00015455	C04G6.5	none available	not known
C04G6.7	WBGene00015457	C04G6.7	none available	not known
C04H4.1	WBGene00007311	C04H4.1	none available	not known
C04H5.7	WBGene00007315	C04H5.7	none available	not known
C05A9.2	WBGene00007317	C05A9.2	none available	not known
C05B5.12	WBGene00194886	C05B5.12	none available	not known
C05B5.16	WBGene00219280	C05B5.16	none available	not known
C05B5.4	WBGene00007321	C05B5.4	C05B5.4 encodes a predicted transmembrane protein that is conserved Concise description: C05B5.4 encodes a predicted transmembrane protein that is conserved in C. briggsae and C. remanei; loss of C05B5.4 activity via RNAi in the sensitized rrf-3 background has been reported to result in slow growth, although this phenotype	not known
C05B5.8	WBGene00007324	C05B5.8	none available	not known
C05C10.3	WBGene00007330	C05C10.3	C05C10.3 is orthologous to the human gene 3-OXOACID COA TRANSFERASE Concise description: C05C10.3 is orthologous to the human gene 3-OXOACID COA TRANSFERASE (also called succinyl-CoA:3-ketoacid CoA transferase; OXCT; OMIM:245050), which	not known
C05C10.5	WBGene00007332	C05C10.5	C05C10.5 encodes a novel protein that is conserved in C. remanei Concise description: C05C10.5 encodes a novel protein that is conserved in C. remanei and C. briggsae; large-scale RNAi screens have indicated that C05C10.5 activity is required for normal body morphology, chromosome segregation, and embryonic development; in situ hybridization experiments reveal that C05C10.5 mRNA is expressed in t…	not known
C05C12.1	WBGene00007335	C05C12.1	none available	not known
C05C12.5	WBGene00007337	C05C12.5	none available	not known
C05C12.6	WBGene00007338	C05C12.6	none available	not known
C05C8.2	WBGene00015461	krr-1	none available	KRR1, small subunit processome component homolog
C05C8.6	WBGene00015463	hpo-9	none available	Hypersensitive to POre-forming toxin
C05C8.8	WBGene00015465	C05C8.8	none available	not known
C05C8.9	WBGene00015466	hyls-1	hyls-1 encodes a novel, conserved protein orthologous to human Concise description: hyls-1 encodes a novel, conserved protein orthologous to human HYLS1; in C. elegans, hyls-1 is required for initiation of ciliogenesis; hyls-1 is not required for intraflagellar transport nor for centriole assembly or centrosome function; HYLS-1 localizes to centrioles and to the base of mature cilia; HYLS-1 local…	HYLS1 (human HYdroLethalus Syndrome) homolog
C05D10.1	WBGene00015477	attf-4	none available	AT hook Transcription Factor family
C05D10.2	WBGene00015478	mapk-15	none available	Mitogen Activated Protein Kinase homolog
C05D10.3	WBGene00015479	wht-1	C05D10.3 encodes an ATP-binding cassette (ABC) transporter; Concise description: C05D10.3 encodes an ATP-binding cassette (ABC) transporter; C05D10.3 activity is required for efficient RNA interference (RNAi) of a germline-expressed	WHiTe (Drosophila) related ABC transporter
C05D11.11	WBGene00003214	mel-32	mel-32 encodes a serine hydroxymethyltransferase; by homology, Concise description: mel-32 encodes a serine hydroxymethyltransferase; by homology, MEL-32 is predicted to catalyze the biochemical reaction that converts serine to glycine and in the process transfers a methyl group to tetrahydrofolate and, thus, into the one-carbon pool used for a variety of cellular metabolic processes; in C. elega…	Maternal Effect Lethal
C05D12.2	WBGene00007340	C05D12.2	none available	not known
C05D12.3	WBGene00014666	C05D12.3	none available	not known
C05D12.5	WBGene00007342	C05D12.5	none available	not known
C05D2.3	WBGene00015467	basl-1	C05D2.3 generally resembles aromatic-L-amino-acid/L-histidine Concise description: C05D2.3 generally resembles aromatic-L-amino-acid/L-histidine decarboxylases; however, its predicted protein sequence lacks six residues critical	BAS-Like
C05D2.4	WBGene00000239	bas-1	bas-1 encodes a serotonin- and dopamine-synthetic aromatic Concise description: bas-1 encodes a serotonin- and dopamine-synthetic aromatic amino acid decarboxylase (AAADC) that is required for the synthesis of serotonin from 5-hydroxytryptophan in vivo; mutations of bas-1 impair the turning step in	Biogenic Amine Synthesis related
C05D2.5	WBGene00001514	xnd-1	none available	X chromosome NonDisjunction factor
C05E11.3	WBGene00015494	C05E11.3	none available	not known
C05E11.4	WBGene00000133	amt-1	amt-1 encodes a transmembrane transporter that by homology, Concise description: amt-1 encodes a transmembrane transporter that by homology, is predicted to transport ammonium ions across the plasma membrane; as loss of amt-1 activity via large-scale RNAi screens does not result in any obvious abnormalities,	AMmonium Transporter homolog
C05E11.8	WBGene00001455	flp-12	flp-12 encodes a predicted FMRFamide-like peptide neurotransmitter Concise description: flp-12 encodes a predicted FMRFamide-like peptide neurotransmitter that affects locomotion when injected into A. suum; expressed in the ASE and PVM	FMRF-Like Peptide
C05E4.14	WBGene00005228	srh-2	none available	Serpentine Receptor, class H
C05E4.9	WBGene00001564	icl-1	icl-1 encodes a predicted isocitrate lyase/malate synthase, Concise description: icl-1 encodes a predicted isocitrate lyase/malate synthase, an enzyme known to function in the glyoxylate cycle; ICL-1 was identified in a screen for proteins that interact with GEX-3, a homolog of human HEM-2 which is required for embryonic development; ICL-1 appears to act downstream of DAF-16 to influence	IsoCitrate Lyase homolog
C05E7.3	WBGene00007345	C05E7.3	none available	not known
C05G5.1	WBGene00007347	C05G5.1	none available	not known
C05G5.5	WBGene00007351	C05G5.5	none available	not known
C05G5.6	WBGene00002285	let-7	let-7 encodes a 21-nucleotide microRNA (also known as a small Concise description: let-7 encodes a 21-nucleotide microRNA (also known as a small temporal RNA, or stRNA) that is conserved in bilateral animal species (including vertebrates, ascidians, hemichordates, molluscs, annelids and arthropods), but is not found in cnidarians, poriferans, fungi, plants, protists, archaea, or bacteria; let-7 i…	LEThal
C05G6.1	WBGene00015497	nhr-76	none available	Nuclear Hormone Receptor family
C06A1.1	WBGene00007352	cdc-48.1	cdc-48.1 encodes a type II AAA ATPase, homologous to yeast Concise description: cdc-48.1 encodes a type II AAA ATPase, homologous to yeast Cdc48 and mammalian p97/VCP, that functions as a ubiquitin-selective chaperone; cdc-48.1 acts redundantly with cdc-48.2 and in conjunction with ufd-1 and npl-4 in endoplasmic reticulum-associated protein degradation (ERAD); in addition, CDC-48.1, UFD-2 and chn…	Cell Division Cycle related
C06A1.12	WBGene00219803	C06A1.12	none available	not known
C06A1.2	WBGene00007353	C06A1.2	none available	not known
C06A1.4	WBGene00014667	C06A1.4	none available	not known
C06A12.3	WBGene00007357	C06A12.3	none available	not known
C06A5.10	WBGene00015506	C06A5.10	none available	not known
C06A5.2	WBGene00015500	C06A5.2	none available	not known
C06A5.4	WBGene00015502	madf-7	none available	MADF domain transcription factor
C06A5.5	WBGene00015503	C06A5.5	none available	not known
C06A5.6	WBGene00015504	C06A5.6	none available	not known
C06A5.8	WBGene00015505	C06A5.8	none available	not known
C06A5.9	WBGene00004380	rnf-1	none available	RiNg Finger protein
C06A6.3	WBGene00015508	mvb-12	mvb-12 encodes a protein containing a domain of unknown function Concise description: mvb-12 encodes a protein containing a domain of unknown function (DUF2464) that is the metazoan homolog of Saccharomyces cerevisiae Mvb12p, a member of the endosomal sorting ESCRT-I complex that functions in endosomal sorting of mono-ubiquitinated membrane proteins; in C. elegans, MVB-12 is a non-essential compo…	MVB (yeast MultiVesicular Body sorting factor) related
C06A6.4	WBGene00015509	C06A6.4	none available	not known
C06A6.7	WBGene00015511	C06A6.7	none available	not known
C06A8.4	WBGene00004823	skr-17	skr-17 encodes a homolog of Skp1 in S. cerevisiae, a core component Concise description: skr-17 encodes a homolog of Skp1 in S. cerevisiae, a core component of the SCF (Skp1p, Cullin, F-box) ubiquitin-ligase complex that facilitates ubiquitin-mediated protein degradation; SKR-17 has no known function in vivo, since skr-17(RNAi) animals are at least superficially normal, and SKR-17 does not appear…	SKp1 Related (ubiquitin ligase complex component)
C06A8.5	WBGene00015515	spdl-1	spdl-1 encodes a coiled-coil protein; RNAi screens indicate Concise description: spdl-1 encodes a coiled-coil protein; RNAi screens indicate that spdl-1 activity is required for proper chromosome segregation, embryonic development,	SPinDLy (Drosophila chromosome segregation) homolog
C06A8.7	WBGene00005262	srh-39	none available	Serpentine Receptor, class H
C06B3.3	WBGene00007362	cyp-35C1	cyp-35C1 encodes one of over 80 C. elegans cytochrome P450s, Concise description: cyp-35C1 encodes one of over 80 C. elegans cytochrome P450s, NADPH-dependent monooxygenases that metabolize endogenous and exogenous compounds; RT-PCR experiments indicate that cyp-35C1 mRNA is upregulated in response to treatment with xenobiotics, such as PCBs (polychlorinated biphenyls) or PAHs (polycyclic aromati…	CYtochrome P450 family
C06B3.8	WBGene00001552	gcy-32	gcy-32 encodes a soluble guanylate cyclase; a gcy-32::gfp reporter Concise description: gcy-32 encodes a soluble guanylate cyclase; a gcy-32::gfp reporter	Guanylyl CYclase
C06B8.1	WBGene00007367	nhr-150	none available	Nuclear Hormone Receptor family
C06C3.11	WBGene00045404	C06C3.11	none available	not known
C06C3.4	WBGene00007375	C06C3.4	none available	not known
C06C3.8	WBGene00007378	C06C3.8	none available	not known
C06C6.4	WBGene00003653	nhr-63	none available	Nuclear Hormone Receptor family
C06C6.7	WBGene00007381	C06C6.7	none available	not known
C06C6.8	WBGene00007382	C06C6.8	none available	not known
C06E1.11	WBGene00015526	C06E1.11	none available	not known
C06E1.8	WBGene00015523	ztf-30	none available	Zinc finger putative Transcription Factor family
C06E2.1	WBGene00015527	C06E2.1	none available	not known
C06E2.7	WBGene00006717	ubc-22	ubc-22 encodes an E2 ubiquitin-conjugating enzyme orthologous Concise description: ubc-22 encodes an E2 ubiquitin-conjugating enzyme orthologous to Saccharomyces cerevisiae UBC8 and human UBC1/HIP2 (Huntingtin interacting protein 2, OMIM:602846) which are involved in regulating fructose-1,6-bisphosphatase and huntingtin catabolism, respectively; by homology, UBC-22 is likely required for covalent…	UBiquitin Conjugating enzyme
C06E2.9	WBGene00044579	C06E2.9	none available	not known
C06E4.3	WBGene00015532	C06E4.3	none available	not known
C06E4.6	WBGene00015535	C06E4.6	none available	not known
C06E7.3	WBGene00015540	sams-4	none available	S-Adenosyl Methionine Synthetase
C06E7.4	WBGene00015541	C06E7.4	none available	not known
C06E7.88	WBGene00189995	C06E7.88	none available	not known
C06E8.5	WBGene00015544	C06E8.5	none available	not known
C06G1.1	WBGene00015545	C06G1.1	none available	not known
C06G1.2	WBGene00015546	C06G1.2	none available	not known
C06G3.2	WBGene00002228	klp-18	klp-18 encodes a kinesin motor protein whose motor domain is Concise description: klp-18 encodes a kinesin motor protein whose motor domain is most similar to that of the Xenopus and human klp2 proteins; loss of klp-18 activity via RNAi indicates that KLP-18 is required for the assembly of a disordered array of acentrosomal (female meiotic) microtubules into an organized, functional, bipolar spin…	Kinesin-Like Protein
C06G3.3	WBGene00015549	C06G3.3	none available	not known
C06G3.6	WBGene00015552	C06G3.6	none available	not known
C06G3.8	WBGene00015554	C06G3.8	none available	not known
C06G4.4	WBGene00015558	C06G4.4	none available	not known
C06H2.2	WBGene00007386	C06H2.2	none available	not known
C06H2.5	WBGene00007389	glb-3	glb-3 encodes a globin with no obvious function in mass RNAi Concise description: glb-3 encodes a globin with no obvious function in mass RNAi	GLoBin related
C06H2.7	WBGene00007391	C06H2.7	none available	not known
C06H5.10	WBGene00235139	C06H5.10	none available	not known
C07A12.1	WBGene00001821	ham-2	The ham-2 gene encodes a C2H2 zinc finger-containing protein Concise description: The ham-2 gene encodes a C2H2 zinc finger-containing protein required for proper migration of the hermaphrodite-specific neurons (HSNs) and proper attachment of the pharynx to the nose; HAM-2 is expressed in the nuclei of the HSNs during migration, and acts downstream of EGL-5, a posterior group Hox protein, in HSN …	HSN Abnormal Migration
C07A12.5	WBGene00005008	spr-3	none available	Suppressor of PResenilin defect
C07A4.3	WBGene00007398	C07A4.3	none available	not known
C07A9.11	WBGene00003572	ncx-7	ncx-7 encodes a putative Na[+]/Ca[2+] exchanger of uncertain Concise description: ncx-7 encodes a putative Na[+]/Ca[2+] exchanger of uncertain stoichiometry and affinity, orthologous to human SLC24A6 and paralogous to NCX-6 and NCX-8/-10; NCX-7 may function intracellularly; NCX-7 has tandem Calx-alpha domains predicted to carry out ion transport; NCX-7 has no obvious function in	Na/Ca eXchangers
C07A9.12	WBGene00043994	C07A9.12	none available	not known
C07A9.13	WBGene00044227	C07A9.13	none available	not known
C07A9.2	WBGene00007400	bud-31	none available	BUD morphology abnormal gene homolog
C07A9.8	WBGene00007404	best-5	none available	BESTrophin (chloride channel) homolog
C07B5.3	WBGene00007408	C07B5.3	none available	not known
C07D10.4	WBGene00003526	nas-7	nas-7 encodes an astacin-like metalloprotease; a NAS-7::GFP Concise description: nas-7 encodes an astacin-like metalloprotease; a NAS-7::GFP reporter fusion is first expressed in embryos just prior to hatching and, in adult animals, is seen in anterior cells adjacent to the pharyngeal metacarpus and terminal	Nematode AStacin protease
C07D8.6	WBGene00015565	C07D8.6	none available	not known
C07E3.1	WBGene00007412	stip-1	none available	STIP (Septin and Tuftelin Interacting Protein) homolog
C07E3.10	WBGene00007420	C07E3.10	none available	not known
C07E3.2	WBGene00007413	pro-2	pro-2 encodes the C. elegans ortholog of Saccharomyces cerevisiae Concise description: pro-2 encodes the C. elegans ortholog of Saccharomyces cerevisiae Noc2p, which is required for intranuclear ribosome maturation and transport; in C. elegans, pro-2 activity is essential for larval growth, somatic gonad development, regulation of germline development and proliferation, and hence, fertility; by v…	PROximal proliferation in germline
C07E3.3	WBGene00007414	C07E3.3	none available	not known
C07E3.5	WBGene00007416	ceh-57	ceh-57 is a divergent homeobox gene that encodes one homeodomain; Concise description: ceh-57 is a divergent homeobox gene that encodes one homeodomain; most homeodomain proteins bind DNA and function as transcription factors; ceh-57	C. Elegans Homeobox
C07F11.2	WBGene00015570	C07F11.2	none available	not known
C07G1.15	WBGene00235296	C07G1.15	none available	not known
C07G1.6	WBGene00015572	C07G1.6	none available	not known
C07G2.1	WBGene00000465	cpg-1	cpg-1 encodes, by alternative splicing, two isoforms of a chondroitin Concise description: cpg-1 encodes, by alternative splicing, two isoforms of a chondroitin proteoglycan; CPG-1 contains three chitin-binding peritrophin-A domains and two mucin-like regions; CPG-1 is individually dispensable for normal embryonic development; however, CPG-1 and CPG-2 are jointly required for osmotic integrity of…	Chondroitin ProteoGlycan
C07G3.10	WBGene00015578	C07G3.10	none available	not known
C07G3.15	WBGene00269378	C07G3.15	none available	not known
C07G3.9	WBGene00015577	ugt-64	none available	UDP-GlucuronosylTransferase
C07H4.2	WBGene00000532	clh-5	The clh-5 gene encodes a chloride channel, whose human homologs Concise description: The clh-5 gene encodes a chloride channel, whose human homologs	CLC-type chloride cHannel
C07H6.5	WBGene00000479	cgh-1	cgh-1 encodes a putative DEAD-box RNA helicase, orthologous Concise description: cgh-1 encodes a putative DEAD-box RNA helicase, orthologous to budding yeast Dhh1p, fission yeast Ste13p, Drosophila ME31B, and human DDX6 (OMIM:600326); CGH-1 inhibits physiological apoptosis in oocytes, keeping it down to a normal level of ~50% in hermaphrodite gonads; independently of apoptosis, CGH-1 is also requ…	Conserved Germline Helicase
C08A9.1	WBGene00004932	sod-3	sod-3 encodes a iron/manganese superoxide dismutase, predicted Concise description: sod-3 encodes a iron/manganese superoxide dismutase, predicted to be mitochondrial, that might defend against oxidative stress and promote normal lifespan; sod-3 mRNA levels are diminished by mutation of daf-16 and chromatin immunoprecipitation (ChIP) studies demonstrate that DAF-16 can directly bind the sod-3 pro…	SOD (superoxide dismutase)
C08A9.11	WBGene00045273	C08A9.11	none available	not known
C08B11.4	WBGene00003813	nrf-6	nrf-6 encodes a protein with 12 predicted transmembrane domains Concise description: nrf-6 encodes a protein with 12 predicted transmembrane domains that is highly similar to NDG-4 and affects embryonic viability, yolk transport, locomotion, body morphology, and affects sensitivity to fluoxetine with respect to nose-contraction response in a common pathway with ndg-4 and nrf-5; expressed in the m…	Nose Resistant to Fluoxetine
C08B11.5	WBGene00004723	sap-49	sap-49 encodes the C. elegans ortholog of mammalian SAP49, Concise description: sap-49 encodes the C. elegans ortholog of mammalian SAP49, a component of the SF3b splicing factor, a U2 snRNP-associated protein complex; loss of sap-49 activity via RNAi results in embryonic lethality, a protruding vulva, reduced levels of gene expression (as assessed by a gfp reporter), and early onset of foci form…	Spliceosome-Associated Protein
C08B11.6	WBGene00007434	arp-6	none available	Actin-Related Proteins
C08B11.7	WBGene00006724	ubh-4	none available	UBiquitin C-terminal Hydrolase (family 1)
C08B11.8	WBGene00007435	C08B11.8	none available	not known
C08B6.11	WBGene00007431	C08B6.11	none available	not known
C08B6.2	WBGene00007423	C08B6.2	none available	not known
C08B6.4	WBGene00007425	C08B6.4	none available	not known
C08B6.7	WBGene00007428	wdr-20	none available	WD Repeat protein
C08B6.9	WBGene00000142	aos-1	aos-1 encodes the C. elegans ortholog of Saccharomyces cerevisiae Concise description: aos-1 encodes the C. elegans ortholog of Saccharomyces cerevisiae Aos1p and human SUMO-1 activating enzyme E1 N subunit; by homology, AOS-1 is predicted to form, with a catalytic subunit, UBA-2, a heterodimeric enzyme that activates the ubiquitin-like protein SMO-1/SUMO in preparation for its covalent attachmen…	Activator Of Sumo (yeast AOS homolog)
C08C3.1	WBGene00001174	egl-5	egl-5 encodes a homeodomain transcription factor, orthologous Concise description: egl-5 encodes a homeodomain transcription factor, orthologous to Drosophila Abd-B and the vertebrate Hox9-13 proteins, that is required for specification of the HSN cell fate and of cell fates within the tail region; EGL-5 is expressed	EGg Laying defective
C08C3.2	WBGene00015590	bath-15	none available	BTB and MATH domain containing
C08C3.4	WBGene00015591	cyk-7	none available	CYtoKinesis defect
C08D8.1	WBGene00015592	C08D8.1	none available	not known
C08E3.1	WBGene00015593	C08E3.1	none available	not known
C08E3.6	WBGene00015598	fbxa-163	This gene encodes a protein containing an F-box, a motif predicted Concise description: This gene encodes a protein containing an F-box, a motif predicted to mediate protein-protein interactions either with homologs of yeast Skp-1p or with other proteins; this gene's encoded protein also contains an FTH/DUF38 motif,	F-box A protein
C08E3.7	WBGene00015599	fbxa-164	This gene encodes a protein containing an F-box, a motif predicted Concise description: This gene encodes a protein containing an F-box, a motif predicted to mediate protein-protein interactions either with homologs of yeast Skp-1p or with other proteins; this gene's encoded protein also contains an FTH/DUF38 motif,	F-box A protein
C08E8.10	WBGene00077692	C08E8.10	none available	not known
C08E8.11	WBGene00119201	C08E8.11	none available	not known
C08E8.3	WBGene00007439	C08E8.3	none available	not known
C08E8.4	WBGene00007440	C08E8.4	none available	not known
C08F1.10	WBGene00015613	C08F1.10	none available	not known
C08F1.8	WBGene00015611	C08F1.8	none available	not known
C08F11.11	WBGene00007458	ule-4	none available	Uterine Lumin Expressed/locailized
C08F11.3	WBGene00007452	C08F11.3	none available	not known
C08F11.8	WBGene00007455	ugt-22	none available	UDP-GlucuronosylTransferase
C08F8.8	WBGene00003657	nhr-67	nhr-67 encodes a nuclear receptor that is orthologous to Drosophila Concise description: nhr-67 encodes a nuclear receptor that is orthologous to Drosophila and vertebrate tailless hormone receptors; during development, nhr-67 plays an essential role in larval development and also functions as part of a complex regulatory network that regulates vulval patterning and differentiation and thus, egg …	Nuclear Hormone Receptor family
C08G5.4	WBGene00004926	snt-6	none available	SyNapTotagmin
C08G9.2	WBGene00015620	C08G9.2	none available	not known
C08H9.11	WBGene00007470	chil-5	none available	CHItinase-Like
C08H9.14	WBGene00007473	chil-8	none available	CHItinase-Like
C08H9.3	WBGene00007464	C08H9.3	none available	not known
C08H9.4	WBGene00007465	chil-1	none available	CHItinase-Like
C08H9.5	WBGene00003862	old-1	old-1 encodes a receptor protein tyrosine kinase; old-1 plays Concise description: old-1 encodes a receptor protein tyrosine kinase; old-1 plays a role in stress resistance and regulation of adult lifespan; Murakami and Johnson showed that old-1 mRNA levels are upregulated in response to stress and in daf-2 and age-1 mutant backgrounds and that overexpression of old-1 in wild-type animals results…	Overexpression Longevity Determinant
C08H9.7	WBGene00007467	chil-3	none available	CHItinase-Like
C08H9.8	WBGene00007468	C08H9.8	none available	not known
C08H9.9	WBGene00014673	C08H9.9	none available	not known
C09B8.3	WBGene00015622	C09B8.3	none available	not known
C09B8.4	WBGene00015623	C09B8.4	none available	not known
C09B8.5	WBGene00015624	C09B8.5	none available	not known
C09B9.2	WBGene00015627	C09B9.2	none available	not known
C09B9.4	WBGene00015629	C09B9.4	none available	not known
C09B9.6	WBGene00003448	msp-55	msp-55 encodes a member of the major sperm protein family.	Major Sperm Protein
C09B9.8	WBGene00044484	hot-9	none available	Homolog of Odr-2 (Two)
C09C7.1	WBGene00006981	zig-4	zig-4 encodes a predicted secreted protein that is a member Concise description: zig-4 encodes a predicted secreted protein that is a member	none available
C09D4.3	WBGene00015634	C09D4.3	none available	not known
C09D4.9	WBGene00206357	C09D4.9	none available	not known
C09E7.4	WBGene00015638	C09E7.4	none available	not known
C09E7.6	WBGene00015640	C09E7.6	none available	not known
C09E7.8	WBGene00015642	C09E7.8	none available	not known
C09E8.2	WBGene00015645	lips-7	none available	LIPaSe related
C09F12.2	WBGene00007482	C09F12.2	none available	not known
C09F5.1	WBGene00015647	C09F5.1	none available	not known
C09F9.2	WBGene00007479	C09F9.2	none available	not known
C09G1.2	WBGene00007484	C09G1.2	none available	not known
C09G1.4	WBGene00007486	C09G1.4	none available	not known
C09G12.9	WBGene00015658	tsg-101	tsg-101 encodes the C. elegans ortholog of S. cerevisiae vacuolar Concise description: tsg-101 encodes the C. elegans ortholog of S. cerevisiae vacuolar protein sorting protein Vps23p and human TUMOR SUSCEPTIBILITY GENE 101 (TSG101; OMIM:601387), mutations in which are associated with several types of cancer and with varying responses to HIV infection; TSG-101 is an essential component of the C. …	Tumor Susceptibility Gene homolog
C09G4.3	WBGene00001051	cks-1	A homolog of Cks/Suc1, a highly conserved member of the eukaryotic Concise description: A homolog of Cks/Suc1, a highly conserved member of the eukaryotic cell cycle machinery that affects both meiosis and mitosis and has a role in the	Cyclin-dependent protein Kinase (CDC28) regulatory Subunit
C09G4.4	WBGene00044001	C09G4.4	none available	not known
C09G4.5	WBGene00003224	mes-6	mes-6 encodes a WD repeat-containing protein that is orthologous Concise description: mes-6 encodes a WD repeat-containing protein that is orthologous to Drosophila Extra sex combs (Esc); as a member of a Polycomb-like chromatin repressive complex with MES-2 and MES-3, MES-6 is required maternally for normal germline development and during larval development, for anteroposterior patterning; durin…	Maternal Effect Sterile
C09G5.1	WBGene00001586	ggr-1	ggr-1 encodes a predicted member of the GABA/ glycine receptor Concise description: ggr-1 encodes a predicted member of the GABA/ glycine receptor family of ligand-gated chloride channels that affects thermotaxis; expressed in AIB, PVR, PVQ, AVH, and SMDV neurons and in some motor neurons in the ventral cord,	GABA/Glycine Receptor family (see gbr)
C09G5.13	WBGene00206538	C09G5.13	none available	not known
C09G5.3	WBGene00000655	col-79	none available	COLlagen
C09G5.5	WBGene00000656	col-80	none available	COLlagen
C09G5.6	WBGene00000251	bli-1	The bli-1 gene encodes an unusual cuticular collagen that is Concise description: The bli-1 gene encodes an unusual cuticular collagen that is required for proper strut formation within the unique medial layer of the adult cuticle; bli-1 interacts genetically with other cuticular collagens such as bli-2 and rol-1, and may be processed for secretion by BLI-4, a Kex2/subtilisin serine endoproteinas…	BLIstered cuticle
C09G5.7	WBGene00007489	C09G5.7	none available	not known
C09G5.8	WBGene00007490	mks-5	none available	MecKel-Gruber Syndrome (MKS) homolog
C09G9.2	WBGene00007493	npp-23	none available	Nuclear Pore complex Protein
C09G9.4	WBGene00006409	hdl-2	tag-19 superficially resembles aromatic-L-amino-acid/L-histidine Concise description: tag-19 superficially resembles aromatic-L-amino-acid/L-histidine decarboxylases; however, it is distantly related, being no closer to them than to glutamine decarboxylase/sphingosinge lyase (e.g., tag-38, spl-1); tag-19 thus might be termed a Pyridoxal-phosphate (PLP) dependent decarboxylase-like protei, but is …	Histidine Decarboxyase Like
C09G9.6	WBGene00003864	oma-1	oma-1 encodes a zinc finger protein of the TIS11 finger type Concise description: oma-1 encodes a zinc finger protein of the TIS11 finger type that is paralogous to OMA-2; while either oma-1 or oma-2 individually have no obvious mutant phenotype, oma-1 and oma-2 doubly mutant animals show defects in oocyte maturation, indicating that the two genes function redundantly in this process; whereas nor…	Oocyte MAturation defective
C09H10.1	WBGene00004455	rpl-42	none available	Ribosomal Protein, Large subunit
C09H10.7	WBGene00007501	apc-17	none available	Anaphase Promoting Complex; see also mat
C09H10.9	WBGene00007503	C09H10.9	none available	not known
C09H5.7	WBGene00015661	C09H5.7	none available	not known
C10A4.3	WBGene00015664	C10A4.3	none available	not known
C10A4.4	WBGene00015665	C10A4.4	none available	not known
C10A4.5	WBGene00015666	gad-2	none available	GAstrulation Defective
C10A4.6	WBGene00015667	C10A4.6	none available	not known
C10C5.2	WBGene00007506	C10C5.2	none available	not known
C10C5.3	WBGene00007507	C10C5.3	none available	not known
C10C5.4	WBGene00007508	C10C5.4	C10C5.4 encodes an aminoacylase with similarity to the vertebrate Concise description: C10C5.4 encodes an aminoacylase with similarity to the vertebrate aminoacylase-I; by homology, the product of C10C5.4 is predicted to hydrolyze N-acetyl	not known
C10C5.5	WBGene00007509	C10C5.5	none available	not known
C10C5.7	WBGene00007511	C10C5.7	none available	not known
C10C6.2	WBGene00007006	npr-3	C10C6.2 encodes a G-protein-coupled receptor for the FMRFamide-related Concise description: C10C6.2 encodes a G-protein-coupled receptor for the FMRFamide-related peptides (FaRPs) encoded by flp-15; C10C6.2 is primarily coupled to Gi/Go proteins, since C10C6.2 signalling is blocked by pertussis toxin; because of its link to Gi/Go	NeuroPeptide Receptor family
C10C6.3	WBGene00007512	C10C6.3	none available	not known
C10F3.1	WBGene00015677	cpg-4	cpg-4 encodes a large (782-residue), unfamiliar, putatively Concise description: cpg-4 encodes a large (782-residue), unfamiliar, putatively secreted protein with a C-terminal low-complexity domain; CPG-4 has 35 potential chondroitin attachment sites, mostly in its C-terminal half, 4 of which have been	Chondroitin ProteoGlycan
C10F3.18	WBGene00219649	linc-55	none available	Long Intervening Non-Coding RNA
C10F3.2	WBGene00000979	dhs-16	dhs-16 encodes a short-chain dehydrogenase predicted to be Concise description: dhs-16 encodes a short-chain dehydrogenase predicted to be	DeHydrogenases, Short chain
C10F3.7	WBGene00015679	C10F3.7	none available	not known
C10G11.1	WBGene00015685	C10G11.1	none available	not known
C10G11.10	WBGene00015690	C10G11.10	none available	not known
C10G11.8	WBGene00015688	C10G11.8	none available	not known
C10G11.9	WBGene00015689	spch-2	spch-2 encodes one of three C. elegans small, highly basic Concise description: spch-2 encodes one of three C. elegans small, highly basic proteins that have similarity to mouse testis-specific histone H1, the human nucleotide-binding and splicing-associated protein SON, and the mollusk protamine-like SNBPs (sperm nuclear basic proteins); SPCH-2 associates specifically with spermatogenic meiotic	SPerm CHromatin enriched
C10G8.4	WBGene00015683	C10G8.4	C10G8.4 encodes a putative secreted TIL-domain protease inhibitor Concise description: C10G8.4 encodes a putative secreted TIL-domain protease inhibitor paralogous to SWM-1, ISL-1, and the products of 11 other C. elegans genes; C10G8.4 and its relatives are collectively similar to other TIL-domain protease inhibitors from nematodes, insects, and vertebrates; C10G8.4 has no obvious function in mass	not known
C10G8.7	WBGene00000454	ceh-33	ceh-33 encodes a Six/sine oculis class homeodomain transcription Concise description: ceh-33 encodes a Six/sine oculis class homeodomain transcription factor; preliminary RNAi experiments suggest that CEH-33 activity may be required for gonad development; a ceh-33::gfp reporter shows very weak pharyngeal expression	C. Elegans Homeobox
C10H11.10	WBGene00015698	kca-1	none available	Kinesin Cargo Adaptor
C10H11.4	WBGene00015693	ugt-28	none available	UDP-GlucuronosylTransferase
C11D2.3	WBGene00015701	C11D2.3	none available	not known
C11D2.4	WBGene00015702	C11D2.4	none available	not known
C11D2.6	WBGene00006809	unc-77	unc-77 encodes, along with nca-2, one of two C. elegans alpha-1-like Concise description: unc-77 encodes, along with nca-2, one of two C. elegans alpha-1-like subunits of a voltage-insensitive cation leak channel related to Drosophila narrow abdomen and the vertebrate Vgcnl1/NALCN proteins; unc-77 functions redundantly with nca-2 to transmit depolarization signals from neuronal cell bodies to axo…	UNCoordinated
C11D9.1	WBGene00015704	tiam-1	none available	TIAM (mammalian Tumor Invasion And Metastasis factor) homolog
C11E4.2	WBGene00007517	gpx-3	none available	Glutathione PeroXidase
C11E4.6	WBGene00007520	C11E4.6	none available	not known
C11E4.7	WBGene00007521	C11E4.7	none available	not known
C11G10.1	WBGene00007525	C11G10.1	none available	not known
C11G6.4	WBGene00003624	nhr-28	none available	Nuclear Hormone Receptor family
C11H1.2	WBGene00007528	C11H1.2	none available	not known
C11H1.7	WBGene00007531	C11H1.7	none available	not known
C12C8.2	WBGene00007533	cbl-1	cbl-1 encodes a putative cystathionine gamma-lyase orthologous Concise description: cbl-1 encodes a putative cystathionine gamma-lyase orthologous to human CTH (OMIM:607657, mutated in cystathioninuria), and paralogous to CTH-1	Cystathionine Beta Lyase
C12C8.3	WBGene00003026	lin-41	lin-41 encodes a novel RBCC (Ring finger-B box-Coiled coil) Concise description: lin-41 encodes a novel RBCC (Ring finger-B box-Coiled coil) protein that is a member of the NHL (NCL-1, HT2A, and LIN-41) family of proteins; lin-41 is a heterochronic gene required for temporal control of specific postembryonic cell fates; lin-41 is also required for proper male tail morphogenesis; lin-41 translatio…	abnormal cell LINeage
C12D12.1	WBGene00015713	C12D12.1	none available	not known
C12D12.3	WBGene00015714	C12D12.3	none available	not known
C12D5.3	WBGene00015706	C12D5.3	none available	not known
C12D5.4	WBGene00015707	C12D5.4	none available	not known
C12D5.5	WBGene00015708	C12D5.5	none available	not known
C12D5.8	WBGene00003684	nhr-94	none available	Nuclear Hormone Receptor family
C12D8.11	WBGene00004405	rop-1	rop-1 encodes an RNAi-binding protein that is orthologous to Concise description: rop-1 encodes an RNAi-binding protein that is orthologous to the vertebrate 60-kDa Ro autoantigen that is the protein component of the Ro ribonucleoprotein (RNP) complex; ROP-1 binds the single C. elegans Ro RNP RNA component, YRN-1 (Y RNA) in vivo and although loss of rop-1 activity via mutation results in no obvio…	RO (Ro) ribonucleoProtein family
C12D8.12	WBGene00006226	str-182	none available	Seven TM Receptor
C12D8.15	WBGene00007542	C12D8.15	none available	not known
C12D8.16	WBGene00007543	fipr-7	none available	FIP (Fungus-Induced Protein) Related
C12D8.18	WBGene00044174	fipr-5	none available	FIP (Fungus-Induced Protein) Related
C12D8.19	WBGene00044175	fipr-9	none available	FIP (Fungus-Induced Protein) Related
C12D8.5	WBGene00007536	daf-36	daf-36 encodes a protein homologous to the catalytic subunit Concise description: daf-36 encodes a protein homologous to the catalytic subunit of Rieske-like oxygenases; DAF-36 functions in a hormone biosynthetic pathway producing a ligand for the DAF-12 nuclear receptor that regulates the developmental decision between reproductive growth and dauer formation; a daf-36::gfp reporter fusion is exp…	abnormal DAuer Formation
C13A10.1	WBGene00015728	C13A10.1	none available	not known
C13A10.2	WBGene00015729	C13A10.2	none available	not known
C13A2.1	WBGene00015718	C13A2.1	none available	not known
C13A2.12	WBGene00044547	C13A2.12	none available	not known
C13A2.3	WBGene00015720	C13A2.3	none available	not known
C13A2.4	WBGene00015721	C13A2.4	none available	not known
C13A2.6	WBGene00015723	C13A2.6	none available	not known
C13A2.9	WBGene00015725	C13A2.9	none available	not known
C13B9.4	WBGene00015735	pdfr-1	pdfr-1 encodes, by alternative splicing, three isoforms of Concise description: pdfr-1 encodes, by alternative splicing, three isoforms of a G-protein-coupled receptor (GPCR) required for normal locomotion; PDFR-1 is orthologous to Drosophila pigment dispersing factor (PDF) receptors, and to human CALCR (OMIM:114131, associated with susceptibility to osteoporesis); pdfr-1 is expressed in all body…	PDF Receptor homolog
C13C12.2	WBGene00007552	C13C12.2	none available	not known
C13C4.4	WBGene00007548	C13C4.4	none available	not known
C13D9.1	WBGene00005657	srr-6	none available	Serpentine Receptor, class R
C13D9.8	WBGene00003574	ncx-9	ncx-9 encodes a putative Na[+]/Ca[2+] exchanger of uncertain Concise description: ncx-9 encodes a putative Na[+]/Ca[2+] exchanger of uncertain stoichiometry and affinity, orthologous to human SLC24A6 and paralogous to NCX-6/-8 and NCX-10; NCX-9 may function intracellularly; NCX-9 has tandem Calx-alpha domains predicted to carry out ion transport; NCX-9 has no obvious function in mass RNAi	Na/Ca eXchangers
C13D9.9	WBGene00015739	ugt-7	none available	UDP-GlucuronosylTransferase
C13F10.4	WBGene00015743	soap-1	none available	Sorting Of Apical Proteins
C13F10.5	WBGene00015744	C13F10.5	none available	not known
C13G5.1	WBGene00000439	ceh-16	ceh-16 encodes a homeodomain protein orthologous to Drosophila Concise description: ceh-16 encodes a homeodomain protein orthologous to Drosophila and vertebrate Engrailed proteins involved in segment and appendage development; ceh-16 is an essential gene required for proper specification and differentiation of the lateral seam cells during embryonic development; in specifying seam cell fates, CE…	C. Elegans Homeobox
C14A11.1	WBGene00006632	tsp-6	none available	TetraSPanin family
C14A11.12	WBGene00219650	linc-56	none available	Long Intervening Non-Coding RNA
C14A11.2	WBGene00015748	C14A11.2	none available	not known
C14A11.3	WBGene00006496	cgef-1	cgef-1 encodes a putative guanine nucleotide exchange factor Concise description: cgef-1 encodes a putative guanine nucleotide exchange factor (GEF) and positively regulates CDC-42 during asymmetric division in the embryo; cgef-1 also affects the localization of PAR proteins in the embryo; since cgef-1 mutants exhibit mild phenotypes, cgef-1 may function redundantly with other GEFs to regulate CD…	CDC-42 Guanine nucleotide Exchange Factor
C14A11.7	WBGene00006055	ssr-2	none available	Sperm-Specific family, class R
C14A4.13	WBGene00007563	C14A4.13	none available	not known
C14A4.14	WBGene00007564	mrps-22	none available	Mitochondrial Ribosomal Protein, Small
C14A4.9	WBGene00007560	C14A4.9	none available	not known
C14B1.10	WBGene00007581	alkb-8	none available	ALKylated DNA repair protein AlkB homolog
C14B1.12	WBGene00184990	C14B1.12	none available	not known
C14B1.2	WBGene00007573	C14B1.2	none available	not known
C14B1.7	WBGene00007578	C14B1.7	none available	not known
C14B1.8	WBGene00007579	C14B1.8	C14B1.8 encodes a coiled-coil protein.	not known
C14B1.9	WBGene00007580	C14B1.9	none available	not known
C14B4.2	WBGene00007583	C14B4.2	none available	not known
C14B9.3	WBGene00015753	C14B9.3	none available	not known
C14C10.1	WBGene00007584	C14C10.1	none available	not known
C14C10.7	WBGene00007590	ttr-43	none available	TransThyretin-Related family domain
C14C11.1	WBGene00015765	C14C11.1	none available	not known
C14C11.2	WBGene00015766	C14C11.2	none available	not known
C14C11.8	WBGene00004104	pqn-13	The protein product of this gene is predicted to contain a Concise description: The protein product of this gene is predicted to contain a glutamine/asparagine (Q/N)-rich ('prion') domain, by the algorithm of Michelitsch	Prion-like-(Q/N-rich)-domain-bearing protein
C14F11.3	WBGene00001803	lite-1	lite-1 encodes a eight-transmembrane protein that is a member Concise description: lite-1 encodes a eight-transmembrane protein that is a member of the invertebrate family of Gustatory receptors; LITE-1 functions in neurons as an ultraviolet light receptor required for proper avoidance (photophobic) response to short-wavelength light; ectopic expression of LITE-1 in other tissues, namely body wal…	high-energy LIghT unrEsponsive
C14F11.4	WBGene00015780	C14F11.4	none available	not known
C14F11.6	WBGene00015781	C14F11.6	none available	not known
C14F5.2	WBGene00006980	zig-3	zig-3 encodes a predicted secreted protein that is a member Concise description: zig-3 encodes a predicted secreted protein that is a member of the immunoglobulin superfamily of proteins; a zig-3::gfp reporter fusion is expressed in the PVT, AIM, and ASI neurons, as well as in the vulva and weakly in the body	2 (Zwei) IG domain protein
C15A11.1	WBGene00000612	col-35	col-35 encodes a collagen that is individually dispensable Concise description: col-35 encodes a collagen that is individually dispensable for viability and gross morphology in mass RNAi screens; the amino- and carboxyl-terminal cysteine-rich regions of COL-35 are most closely related to those of COL-8, COL-19,	COLlagen
C15A11.5	WBGene00000596	col-7	col-7 encodes a member of the collagen superfamily containing Concise description: col-7 encodes a member of the collagen superfamily containing collagen triple helix repeats (20 copies); expressed during the L2-to-dauer molt	COLlagen
C15A11.6	WBGene00000638	col-62	none available	COLlagen
C15A7.1	WBGene00007594	lgc-23	none available	Ligand-Gated ion Channel
C15B12.4	WBGene00015786	C15B12.4	none available	not known
C15B12.5	WBGene00001517	gar-1	gar-1 encodes a G protein-linked muscarinic acetylcholine receptor; Concise description: gar-1 encodes a G protein-linked muscarinic acetylcholine receptor; though gar-1 is most closely related to muscarinic acetylcholine receptors (mAChR), it is pharmacologically distinct from them in its response to certain ligands; gar-1 gene transcripts are expressed at all developmental stages; the GAR-1-GFP…	G-protein-linked Acetylcholine Receptor
C15B12.8	WBGene00015788	C15B12.8	none available	not known
C15C6.1	WBGene00007600	C15C6.1	none available	not known
C15C6.2	WBGene00007601	C15C6.2	none available	not known
C15C6.4	WBGene00007603	C15C6.4	C15C6.4 encodes an ortholog of Pop4 (Rpp29), a protein subunit Concise description: C15C6.4 encodes an ortholog of Pop4 (Rpp29), a protein subunit of the endoribonuclease RNAse P, which cleaves tRNA precursors to produce their	not known
C15C7.4	WBGene00015790	C15C7.4	none available	not known
C15C8.1	WBGene00007604	xbx-9	none available	X-BoX promoter element regulated
C15C8.5	WBGene00007607	C15C8.5	none available	not known
C15F1.2	WBGene00015795	C15F1.2	none available	not known
C15F1.8	WBGene00015797	C15F1.8	none available	not known
C15H11.1	WBGene00007613	C15H11.1	none available	not known
C15H11.10	WBGene00007618	C15H11.10	none available	not known
C15H11.5	WBGene00007615	set-31	set-31 encodes a protein with an N-terminal Chromo domain, Concise description: set-31 encodes a protein with an N-terminal Chromo domain, and a C-terminal SET domain; SET-31 has no obvious non-nematode orthologs; set-31(ok1482) has no obvious mutant phenotype, and SET-31 has no obvious function in mass RNAi	SET (trithorax/polycomb) domain containing
C15H11.6	WBGene00003835	nxf-2	nxf-2 encodes a predicted homolog of human TAP protein, a member Concise description: nxf-2 encodes a predicted homolog of human TAP protein, a member of the NXF family of shuttling transport receptors for nuclear export of mRNA, and	Nuclear eXport Factor
C15H11.8	WBGene00007616	rpoa-12	none available	RNA POlymerase I (A) subunit
C15H7.3	WBGene00007610	C15H7.3	none available	not known
C15H7.4	WBGene00007611	C15H7.4	none available	not known
C15H9.1	WBGene00003778	nnt-1	nnt-1 encodes a proton-pumping nicotinamide nucleotide transhydrogenase Concise description: nnt-1 encodes a proton-pumping nicotinamide nucleotide transhydrogenase	Nicotinamide Nucleotide Transhydrogenase
C15H9.2	WBGene00015798	C15H9.2	none available	not known
C15H9.7	WBGene00015802	kynu-1	none available	KYNUreninase homolog
C16A11.1	WBGene00001673	gpa-11	gpa-11 encodes a member of the G protein alpha subunit family Concise description: gpa-11 encodes a member of the G protein alpha subunit family	G Protein, Alpha subunit
C16A11.4	WBGene00015817	C16A11.4	none available	not known
C16A11.5	WBGene00015818	C16A11.5	none available	not known
C16A11.6	WBGene00015819	fbxc-44	none available	F-box C protein
C16A11.9	WBGene00045297	fbxc-43	none available	F-box C protein
C16A3.10	WBGene00015814	oatr-1	C16A3.10 encodes an ornithine transaminase orthologous to the Concise description: C16A3.10 encodes an ornithine transaminase orthologous to the human gene OAT (ornithine aminotransferase); the product of C16A3.10 is predicted to catalyze the conversion of ornithine to L-glutamate-5-semialdehyde in the process	Ornithine AminoTransferase Related
C16B8.4	WBGene00015824	C16B8.4	none available	not known
C16B8.t3	WBGene00022929	C16B8.t3	none available	not known
C16C10.1	WBGene00007622	C16C10.1	none available	not known
C16C10.11	WBGene00007630	har-1	none available	HemiAsterlin Resistant
C16C10.13	WBGene00007632	C16C10.13	none available	not known
C16C10.3	WBGene00007624	hrde-1	none available	Heritable RNAi Deficient
C16C10.5	WBGene00007626	rnf-121	rnf-121 encodes a RING finger E3 ubiquitin ligase; RNF-121 Concise description: rnf-121 encodes a RING finger E3 ubiquitin ligase; RNF-121 appears to function in the endoplasmic reticulum-associated degradation (ERAD) pathway downstream of PEK-1; RNF-121 exhibits E3 ubiquitin-protein ligase activity in vitro and in vivo regulates levels of the PAT-3 beta integrin subunit which is an RNF-121 subst…	RiNg Finger protein
C16C2.3	WBGene00007620	ocrl-1	The C16C2.3 gene encodes an inositol-1,4,5-triphosphate 5-phosphatase Concise description: The C16C2.3 gene encodes an inositol-1,4,5-triphosphate 5-phosphatase	OCRL (Lowe's oculocerebrorenal syndrome protein) homolog
C16C4.15	WBGene00015839	math-10	none available	MATH (meprin-associated Traf homology) domain containing
C16C8.12	WBGene00015850	C16C8.12	none available	not known
C16C8.13	WBGene00015851	C16C8.13	none available	not known
C16C8.16	WBGene00015853	C16C8.16	none available	not known
C16C8.17	WBGene00015854	C16C8.17	none available	not known
C16C8.18	WBGene00015855	C16C8.18	none available	not known
C16C8.2	WBGene00015841	skpo-2	none available	ShK domain and PerOxidase domain containing protein
C16C8.20	WBGene00195070	C16C8.20	none available	not known
C16C8.22	WBGene00195072	C16C8.22	none available	not known
C16C8.4	WBGene00015842	C16C8.4	none available	not known
C16C8.5	WBGene00015843	C16C8.5	none available	not known
C16C8.8	WBGene00015846	C16C8.8	none available	not known
C16D9.5	WBGene00015860	C16D9.5	none available	not known
C16D9.6	WBGene00015861	C16D9.6	none available	not known
C16D9.9	WBGene00015864	C16D9.9	none available	not known
C16E9.2	WBGene00015866	C16E9.2	none available	not known
C17B7.15	WBGene00268213	C17B7.15	none available	not known
C17B7.4	WBGene00015878	C17B7.4	none available	not known
C17B7.5	WBGene00015879	C17B7.5	none available	not known
C17C3.1	WBGene00015887	C17C3.1	none available	not known
C17C3.12	WBGene00015894	acdh-2	acdh-2 encodes a short-chain acyl-CoA dehydrogenase; ACDH-2 Concise description: acdh-2 encodes a short-chain acyl-CoA dehydrogenase; ACDH-2 is predicted to be a mitochondrial enzyme that catalyzes the first step of fatty acid beta-oxidation and thus plays a key role in energy production; steady-state acdh-2 mRNA levels are under the control of the MDT-15 mediator complex subunit; in addition, ge…	Acyl CoA DeHydrogenase
C17C3.15	WBGene00015896	C17C3.15	none available	not known
C17C3.18	WBGene00002096	ins-13	ins-13 encodes an insulin-like peptide of the insulin superfamily Concise description: ins-13 encodes an insulin-like peptide of the insulin superfamily of proteins (OMIM:176730, 147440); INS-13 is one of 38 insulin-like peptides in C. elegans, and the precise role of INS-13 in C. elegans development is not yet	INSulin related
C17C3.5	WBGene00015890	C17C3.5	none available	not known
C17C3.9	WBGene00015892	C17C3.9	none available	not known
C17D12.5	WBGene00007639	C17D12.5	none available	not known
C17D12.6	WBGene00004963	spe-9	spe-9 encodes an EGF repeat-containing protein with a short Concise description: spe-9 encodes an EGF repeat-containing protein with a short intracellular domain; SPE-9 is required autonomously in sperm for fertilization, and by homology, likely mediates an adhesive or signaling event necessary for proper oocyte fertilization; spe-9 mRNA is detected solely in animals that are engaged in spermatog…	defective SPErmatogenesis
C17D12.7	WBGene00007640	C17D12.7	none available	not known
C17E4.1	WBGene00007641	C17E4.1	none available	not known
C17E4.2	WBGene00007642	C17E4.2	none available	not known
C17E4.3	WBGene00007643	2019-03-03	none available	MARCH (Membrane-Associated Ring finger (C3HC4)) homolog
C17E4.4	WBGene00007644	C17E4.4	none available	not known
C17E4.6	WBGene00007645	C17E4.6	none available	not known
C17E7.1	WBGene00015897	nhr-156	none available	Nuclear Hormone Receptor family
C17E7.12	WBGene00015905	C17E7.12	none available	not known
C17E7.13	WBGene00015906	C17E7.13	none available	not known
C17E7.4	WBGene00015899	C17E7.4	none available	not known
C17E7.9	WBGene00015903	C17E7.9	none available	not known
C17F3.1	WBGene00015907	C17F3.1	none available	not known
C17F3.3	WBGene00015908	C17F3.3	none available	not known
C17F4.11	WBGene00044373	C17F4.11	none available	not known
C17F4.12	WBGene00044374	C17F4.12	none available	not known
C17F4.3	WBGene00015911	C17F4.3	none available	not known
C17F4.5	WBGene00015912	fbxc-50	This gene encodes a protein containing an F-box, a motif predicted Concise description: This gene encodes a protein containing an F-box, a motif predicted to mediate protein-protein interactions either with homologs of yeast Skp-1p or	F-box C protein
C17F4.7	WBGene00015913	C17F4.7	none available	not known
C17F4.8	WBGene00015914	C17F4.8	none available	not known
C17G1.2	WBGene00007649	C17G1.2	none available	not known
C17G10.1	WBGene00015915	C17G10.1	none available	not known
C17G10.3	WBGene00015917	C17G10.3	none available	not known
C17G10.6	WBGene00015918	C17G10.6	none available	not known
C17H11.1	WBGene00015921	C17H11.1	none available	not known
C17H11.2	WBGene00015922	C17H11.2	none available	not known
C17H11.6	WBGene00015926	C17H11.6	none available	not known
C17H12.10	WBGene00015935	C17H12.10	none available	not known
C17H12.12	WBGene00015937	C17H12.12	none available	not known
C17H12.2	WBGene00015928	C17H12.2	none available	not known
C17H12.5	WBGene00015931	C17H12.5	none available	not known
C17H12.6	WBGene00015932	C17H12.6	none available	not known
C17H12.8	WBGene00015933	C17H12.8	none available	not known
C18A11.1	WBGene00015947	C18A11.1	none available	not known
C18A11.2	WBGene00015948	C18A11.2	none available	not known
C18A3.10	WBGene00015946	C18A3.10	none available	not known
C18A3.3	WBGene00015941	C18A3.3	none available	not known
C18A3.6	WBGene00004267	rab-3	rab-3 encodes a rab3 homolog, a member of the Ras GTPase superfamily, Concise description: rab-3 encodes a rab3 homolog, a member of the Ras GTPase superfamily, and affects sensitivity to aldicarb and the distribution of synaptic vesicle populations and thereby affects synaptic transmission, track amplitude and speed of movement, chemotaxis to isoamyl alcohol, affects pharyngeal pump durations, a…	RAB family
C18B10.10	WBGene00006285	str-259	none available	Seven TM Receptor
C18B12.2	WBGene00007664	seb-3	none available	SEcretin/class B GPCR
C18B12.3	WBGene00001096	dsc-1	none available	Defecation Suppressor of Clk-1
C18B12.6	WBGene00007668	C18B12.6	none available	not known
C18B2.2	WBGene00015953	C18B2.2	none available	not known
C18C4.2	WBGene00000477	cft-1	none available	Cystic Fibrosis Transmembrane conductance regulator homolog
C18C4.9	WBGene00015969	glb-6	glb-6 encodes a novel globin-like protein; GLB-6 is expressed Concise description: glb-6 encodes a novel globin-like protein; GLB-6 is expressed in neurons and glb-6 expression is downregulated in a daf-2(e1370) mutant background under normoxic conditions; biochemical characterization of GLB-6 indicates that CO, NO, and CN- do not bind to the heme in GLB-6 and that GLB-6 demonstrates a low	GLoBin related
C18D1.3	WBGene00001447	flp-4	none available	FMRF-Like Peptide
C18D11.2	WBGene00007680	maa-1	maa-1 encodes a novel, transmembrane acyl-CoA-binding protein; Concise description: maa-1 encodes a novel, transmembrane acyl-CoA-binding protein; maa-1 activity, together with that of rme-1, is required for normal rates of endosomal recycling and for proper endosomal shape and morphology; a rescuing MAA-1::GFP fusion protein is expressed in the hypodermis (excluding the seam cells) and the intes…	Membrane Associated Acyl-CoA binding protein
C18D11.3	WBGene00007681	C18D11.3	none available	not known
C18D11.4	WBGene00004705	rsp-8	rsp-8 encodes the C. elegans ortholog of the conserved Tra2beta Concise description: rsp-8 encodes the C. elegans ortholog of the conserved Tra2beta	SR Protein (splicing factor)
C18D11.6	WBGene00007682	C18D11.6	none available	not known
C18E3.1	WBGene00015970	C18E3.1	none available	not known
C18E3.6	WBGene00015975	cas-2	none available	Cyclase ASsociated protein homolog
C18E3.7	WBGene00004093	ppw-1	ppw-1 encodes a PAZ (PIWI/Argonaute/Zwille)/PIWI domain-containing Concise description: ppw-1 encodes a PAZ (PIWI/Argonaute/Zwille)/PIWI domain-containing protein that is a member of the Argonaute family of proteins; ppw-1 activity is	PAZ/PIWI domain-containing
C18E3.8	WBGene00001985	hop-1	hop-1 encodes one of three C. elegans presenilins (the other Concise description: hop-1 encodes one of three C. elegans presenilins (the other two presenilins are encoded by sel-12 and spe-4); originally identified on the basis of its sequence similarity to SEL-12 and the human PS1 and PS2 presenilins, HOP-1 has been shown to function redundantly with SEL-12 in embryonic, larval, and germline dev…	Homolog Of Presenilin
C18E3.9	WBGene00015976	C18E3.9	none available	not known
C18E9.11	WBGene00003870	ooc-5	ooc-5 encodes a AAA+ ATPase that is related to the Torsin family Concise description: ooc-5 encodes a AAA+ ATPase that is related to the Torsin family of proteins; along with TOR-1 and TOR-2, OOC-5 comprises the three C. elegans orthologs of human Torsin 1A; during embryonic development, OOC-5 activity is essential and required for re-establishment of PAR protein asymmetry in the P1 cell of the t…	abnormal OOCyte formation
C18E9.5	WBGene00007685	C18E9.5	none available	not known
C18E9.6	WBGene00007686	tomm-40	none available	Translocase of Outer Mitochondrial Membrane
C18E9.7	WBGene00007687	C18E9.7	none available	not known
C18F10.2	WBGene00015977	C18F10.2	none available	not known
C18G1.4	WBGene00003994	pgl-3	pgl-3 encodes a novel protein that is a member of the PGL (P Concise description: pgl-3 encodes a novel protein that is a member of the PGL (P Granule Abnormality) family of C. elegans proteins that are associated with germline P granules; pgl-3 functions redundantly with pgl-1 in hermaphrodite germline development by controlling the extent of germline proliferation as well as gametogenesis and e…	P-GranuLe abnormality
C18G1.5	WBGene00001855	hil-4	none available	HIstone H1 Like
C18G1.6	WBGene00015984	C18G1.6	none available	not known
C18G1.9	WBGene00015987	C18G1.9	none available	not known
C18H2.5	WBGene00015992	C18H2.5	none available	not known
C18H7.1	WBGene00015993	C18H7.1	none available	not known
C18H7.11	WBGene00044457	C18H7.11	none available	not known
C18H7.3	WBGene00000676	col-102	col-102 encodes a cuticle collagen.	COLlagen
C18H7.4	WBGene00015994	C18H7.4	none available	not known
C18H7.6	WBGene00015996	C18H7.6	none available	not known
C18H7.7	WBGene00015997	C18H7.7	none available	not known
C18H9.6	WBGene00016004	C18H9.6	none available	not known
C18H9.8	WBGene00016005	ift-74	ift-74 encodes a protein that interacts with the intraflagellar Concise description: ift-74 encodes a protein that interacts with the intraflagellar transport (IFT) component IFT-81; ift-74 along with ift-81 is involved in growth, chemotaxis, intraflagellar transport and the morphogenesis of cilia; ift-74 colocalizes with ift-81 in the ciliary transition zone; ift-74 binds ift-81 in protien bindi…	IFT (Chlamydomonas IntraFlagellar Transport) homolog
C23G10.11	WBGene00016017	C23G10.11	none available	not known
C23G10.7	WBGene00016014	C23G10.7	none available	not known
C23H3.7	WBGene00006611	tre-5	none available	TREhalase
C23H3.9	WBGene00016022	C23H3.9	none available	not known
C23H4.1	WBGene00000277	cab-1	Novel protein which has a C-terminal motif weakly homologous Concise description: Novel protein which has a C-terminal motif weakly homologous to mouse NPDC-1 and is involved in synaptic regulation; it is expressed in various neurons including ventral cord and tail ganglion neurons; it physically interacts	C-terminus-of-AEX-Binding protein
C23H5.1	WBGene00016023	prmt-6	none available	PRotein arginine MethylTransferase
C23H5.15	WBGene00219423	C23H5.15	none available	not known
C23H5.2	WBGene00016024	glb-7	glb-7 encodes a globin with no obvious function in mass RNAi Concise description: glb-7 encodes a globin with no obvious function in mass RNAi	GLoBin related
C23H5.8	WBGene00016027	C23H5.8	none available	not known
C23H5.9	WBGene00001729	grl-20	grl-20 encodes a hedgehog-like protein, with an N-terminal Concise description: grl-20 encodes a hedgehog-like protein, with an N-terminal signal sequence, a central low-complexity region, and a C-terminal Ground-like (Grl) domain; the Grl domain is predicted to form a cysteine-crosslinked protein involved in intercellular signalling, and it has subtle similarity to the N-terminal Hedge	GRound-Like (grd related)
C24A1.1	WBGene00016028	flp-24	none available	FMRF-Like Peptide
C24A11.1	WBGene00016040	C24A11.1	none available	not known
C24A8.6	WBGene00044004	C24A8.6	none available	not known
C24B5.1	WBGene00016044	C24B5.1	none available	not known
C24B5.3	WBGene00004216	ptr-1	ptr-1 encodes an ortholog of Drosophila and human PTCHD3, which Concise description: ptr-1 encodes an ortholog of Drosophila and human PTCHD3, which defines one of seven paralogous families of sterol sensing domain (SSD) proteins; individually, PTR-1 is weakly required for normal molting from L4 to adult stages; however, PTR-1, in conjunction with either PTR-16 alone or with PTR-6 and PTR-10, is …	PaTched Related family
C24B5.4	WBGene00016046	C24B5.4	none available	not known
C24B9.9	WBGene00016052	dod-3	none available	Downstream Of DAF-16 (regulated by DAF-16)
C24D10.1	WBGene00016053	C24D10.1	none available	not known
C24D10.2	WBGene00016054	C24D10.2	none available	not known
C24D10.4	WBGene00016055	C24D10.4	none available	not known
C24D10.5	WBGene00016056	C24D10.5	none available	not known
C24D10.7	WBGene00016058	nspd-3	none available	Nematode Specific Peptide family, group D
C24D10.8	WBGene00043147	nspd-6	none available	Nematode Specific Peptide family, group D
C24F3.2	WBGene00007697	C24F3.2	none available	not known
C24F3.5	WBGene00000019	abt-1	abt-1 encodes a predicted ATP-binding cassette (ABC) transporter Concise description: abt-1 encodes a predicted ATP-binding cassette (ABC) transporter that is a member of the ABCA subfamily of transport proteins; ABT-1 is predicted to function as a transmembrane protein that couples energy to transport of various molecules across membranes; abt-1 is required for efficient RNA interference in	ABC Transporter family
C24F3.6	WBGene00000698	col-124	none available	COLlagen
C24G6.1	WBGene00006376	syp-2	syp-2 encodes a coiled-coil protein; during meiosis, syp-2 Concise description: syp-2 encodes a coiled-coil protein; during meiosis, syp-2 activity is required for the normal progression of chromosome organization in the nucleus, for maintaining stable pairing between homologous chromosomes subsequent to initial pairing, and for productive crossover events and chiasmata formation; SYP-2 localizes…	SYnaPsis in meiosis abnormal
C24G6.7	WBGene00001710	grl-1	grl-1 encodes a hedgehog-like protein, with an N-terminal signal Concise description: grl-1 encodes a hedgehog-like protein, with an N-terminal signal sequence, a central proline-rich region, and a C-terminal Ground-like (Grl) domain; GRL-1 is expressed in intestine, neurons, and larval arcade cells; the Grl domain is predicted to form a cysteine-crosslinked protein involved in intercellular sign…	GRound-Like (grd related)
C24H10.1	WBGene00016067	C24H10.1	C24H10.1 encodes a claudin homolog that may be required for Concise description: C24H10.1 encodes a claudin homolog that may be required for normal cohesion of apical junctions in epithelia; C24H10.1 is worm-specific, with obvious homologs only in C. elegans; C24H10.1 has no obvious function in mass RNAi assays; claudins are integral membrane proteins with four transmembrane sequences that are fo…	not known
C24H10.3	WBGene00016069	C24H10.3	none available	not known
C24H11.5	WBGene00007702	C24H11.5	none available	not known
C24H11.9	WBGene00007704	mdt-21	none available	MeDiaTor
C24H12.1	WBGene00016071	C24H12.1	This gene encodes a protein containing an F-box, a motif predicted Concise description: This gene encodes a protein containing an F-box, a motif predicted to mediate protein-protein interactions either with homologs of yeast Skp-1p or with other proteins; its encoded protein also contains a Pfam-B45 motif of presently	not known
C24H12.2	WBGene00016072	C24H12.2	none available	not known
C24H12.5	WBGene00016074	dnsn-1	none available	Downstream Neighbor of SoN homolog
C25A1.12	WBGene00007711	lid-1	none available	LIpid Droplet protein
C25A1.2	WBGene00001442	fkh-10	fkh-10 encodes one of 15 forkhead transcriptional regulators Concise description: fkh-10 encodes one of 15 forkhead transcriptional regulators encoded by the C. elegans genome; by homology, FKH-10 is predicted to function as a transcription factor that regulates gene expression during development; however, as loss of fkh-10 activity via RNA-mediated interference (RNAi) does not result in any obvi…	ForKHead transcription factor family
C25A1.20	WBGene00303030	C25A1.20	none available	not known
C25A1.3	WBGene00006447	tag-72	none available	Temporarily Assigned Gene name
C25A1.8	WBGene00007709	clec-87	clec-87 encodes a C-type lectin, paralogous to CLEC-88, C25B8.4, Concise description: clec-87 encodes a C-type lectin, paralogous to CLEC-88, C25B8.4, F26D10.12, and ZK858.3; CLEC-87 has a single chondroitin attachment site verified by mass spectrometry; clec-87 expression is upregulated in response to pathogen	C-type LECtin
C25A1.9	WBGene00007710	rsa-1	rsa-1 encodes a protein phosphatase 2A (PP2A) regulatory subunit Concise description: rsa-1 encodes a protein phosphatase 2A (PP2A) regulatory subunit of the B'' class; RSA-1 is required for localization of C. elegans PP2A to centrosomes and for mitotic spindle assembly; RSA-1 physically interacts with the LET-92 PP2A catalytic subunit and the PAA-1 PP2A structural subunit; centrosomal levels of …	Regulator of Spindle Assembly
C25A11.2	WBGene00016087	C25A11.2	none available	not known
C25A6.1	WBGene00016081	C25A6.1	none available	not known
C25A8.2	WBGene00016083	C25A8.2	none available	not known
C25A8.4	WBGene00016084	cht-3	none available	CHiTinase
C25A8.5	WBGene00016085	C25A8.5	none available	not known
C25B8.4	WBGene00016088	clec-266	none available	C-type LECtin
C25B8.8	WBGene00044297	C25B8.8	none available	not known
C25D7.1	WBGene00007714	C25D7.1	none available	not known
C25D7.15	WBGene00007722	C25D7.15	none available	not known
C25D7.16	WBGene00050940	C25D7.16	none available	not known
C25D7.4	WBGene00007716	fbxa-82	This gene encodes a protein containing an F-box, a motif predicted Concise description: This gene encodes a protein containing an F-box, a motif predicted to mediate protein-protein interactions either with homologs of yeast Skp-1p or with other proteins; this gene's encoded protein also contains an FTH/DUF38 motif,	F-box A protein
C25D7.8	WBGene00007718	otub-1	none available	OTUBain deubiquitylating protease homolog
C25E10.1	WBGene00016091	nhr-30	none available	Nuclear Hormone Receptor family
C25E10.11	WBGene00016100	C25E10.11	none available	not known
C25E10.13	WBGene00023431	C25E10.13	none available	not known
C25E10.16	WBGene00202512	C25E10.16	none available	not known
C25E10.2	WBGene00016092	cyp-33B1	none available	CYtochrome P450 family
[truncated: 5,629 more rows]

## Sheet: DEG_EMB_vs_YA
Table S7 Deferentially expressed genes between embryo, L1 and young adult stage.
Sequence name	WBID	Symbol	Concise	Geneclass
2RSSE.1	WBGene00007064	2RSSE.1	2RSSE.1 encodes a protein that contains a RhoGAP domain and Concise description: 2RSSE.1 encodes a protein that contains a RhoGAP domain and that is similar to Drosophila RhoGAP71E whose activity regulates the number and	not known
[truncated: 6,986 more rows]
