# Supplementary material for: Direct full-length RNA sequencing reveals unexpected transcriptome complexity during Caenorhabditis elegans development
Source: HighWire-hosted journal article supplement (doi:10.1101/gr.251512.119), 2020-02-01
Supplement: Supplemental_Table_S8.xlsx [file Supplemental_Table_S8.xlsx]

## Sheet: L1_versus_EMB
Table S8 Deferentially expressed isoforms by ratio between L1 and EMB stages, or between YA and L1 stages, or between YA and EMB stages
Gene	WBID	Symbol	Isoform	Total_read_coverage_by_isoform	Total_read_coverage_by_isoform_in_EMB	Total_read_coverage_by_isoform_in_L1	Total_read_coverage_by_isoform_in_YA	Total_read_coverage_by_gene	Total_read_coverage_by_gene_in_EMB	Total_read_coverage_by_gene_in_L1	Total_read_coverage_by_gene_in_YA	Total_read_coverage_by_isoform_in_EMB/Total_read_coverage_by_gene (EMB_ratio)	Total_read_coverage_by_isoform_in_L1/Total_read_coverage_by_gene (L1_ratio)	Total_read_coverage_by_isoform_in_YA/Total_read_coverage_by_gene (YA_ratio)	L1_ratio - EMB_ratio	Concise description
2L52.1	WBGene00007063	2L52.1	fac4bc00-fcc2-46ee-90e7-afa02d9fa19e	10.6138	6.75422	1.92978	1.92978	15.9207	9.78672	3.44603	2.6879	0.424242	0.197183	0.56	-0.227059	2L52.1 encodes a protein with sequence similarity to GLI-family Concise description: 2L52.1 encodes a protein with sequence similarity to GLI-family zinc-finger transcription factors; deletion mutations in 2L52.1 are reported to
2RSSE.1	WBGene00007064	2RSSE.1	2cee1c08-6f03-4911-8d90-13f438396149	5.85968	5.37138	0.488307	0	19.348	17.9479	1.40012	0	0.277619	0.0272069	0	-0.250412	2RSSE.1 encodes a protein that contains a RhoGAP domain and Concise description: 2RSSE.1 encodes a protein that contains a RhoGAP domain and that is similar to Drosophila RhoGAP71E whose activity regulates the number and
AC3.7	WBGene00007072	ugt-1	5fe9aaac-ee85-4f3b-889f-ce369b612f36	5.61171	0	0.561171	5.05054	33.168	3.00455	0.989671	29.1738	0	0.567028	0.173119	0.567028	none available
AC3.7	WBGene00007072	ugt-1	f5af8104-fee9-4e06-9e27-3c3bb650fcb7	2.81928	0.939761	0	1.87952	33.168	3.00455	0.989671	29.1738	0.312779	0	0.064425	-0.312779	none available
AC3.7	WBGene00007072	ugt-1	9315b0eb-6b6d-4559-9f88-e5307180b61a	2.65344	1.76896	0	0.884481	33.168	3.00455	0.989671	29.1738	0.588761	0	0.0303176	-0.588761	none available
AC3.7	WBGene00007072	ugt-1	35c32214-d568-4a43-b8f5-a3bcb9531f20	4.28499	0	0.428499	3.85649	33.168	3.00455	0.989671	29.1738	0	0.432972	0.13219	0.432972	none available
AC3.8	WBGene00007073	ugt-2	b59210d7-91e6-4f05-80a1-a108c2685fdd	8.20155	2.05039	5.12597	1.02519	50.4154	2.62261	33.1965	14.5963	0.781811	0.154413	0.0702364	-0.627398	none available
AC7.1	WBGene00006428	tkr-3	741a2f83-fb4c-4e7a-b461-27bc4cb67285	5.30688	1.06138	1.06138	3.18413	6.63361	1.72474	1.06138	3.84749	0.615385	1	0.827586	0.384615	none available
AC7.1	WBGene00006428	tkr-3	3e7720c4-9a38-4ca8-abe8-8d62c022f1f2	0.663361	0.663361	0	0	6.63361	1.72474	1.06138	3.84749	0.384615	0	0	-0.384615	none available
AH6.2	WBGene00007080	sfxn-1.1	AH6.2.1	1.32672	0	1.32672	0	11.2771	1.1056	4.64352	5.528	0	0.285714	0	0.285714	none available
AH6.2	WBGene00007080	sfxn-1.1	2eec0dea-499e-4553-9152-57b5335f53fa	9.95041	1.1056	3.3168	5.528	11.2771	1.1056	4.64352	5.528	1	0.714286	1	-0.285714	none available
AH9.6	WBGene00044701	AH9.6	642f519f-9dd9-4142-a731-beed902b075a	1.32672	0	1.32672	0	6.63361	1.32672	5.30688	0	0	0.25		0.25	AH9.6 encodes a novel protein that contains two predicted transmembrane Concise description: AH9.6 encodes a novel protein that contains two predicted transmembrane
AH9.6	WBGene00044701	AH9.6	c8d5b6b3-8af3-4850-ba07-274ed7a58473	2.65344	0	2.65344	0	6.63361	1.32672	5.30688	0	0	0.5		0.5	AH9.6 encodes a novel protein that contains two predicted transmembrane Concise description: AH9.6 encodes a novel protein that contains two predicted transmembrane
AH9.6	WBGene00044701	AH9.6	8fa2a634-6ce9-4236-b721-5bd9c45d1628	2.65344	1.32672	1.32672	0	6.63361	1.32672	5.30688	0	1	0.25		-0.75	AH9.6 encodes a novel protein that contains two predicted transmembrane Concise description: AH9.6 encodes a novel protein that contains two predicted transmembrane
B0019.1	WBGene00000138	amx-2	bc87bce0-fcb1-408d-83b4-42a6cab8d568	12.1911	0	8.34127	3.84982	70.3162	6.55556	37.7517	26.0089	0	0.220951	0.148019	0.220951	none available
B0019.1	WBGene00000138	amx-2	fbec0cf8-b2c8-4677-b8a0-65bb7be11d3b	37.1482	6.55556	15.2963	15.2963	70.3162	6.55556	37.7517	26.0089	1	0.405182	0.588117	-0.594818	none available
B0024.15	WBGene00007104	B0024.15	83b81f0d-30a9-4683-a123-a811a1a1e491	2.65344	0	1.32672	1.32672	9.28705	1.32672	4.86464	3.09568	0	0.272727	0.428571	0.272727	none available
B0024.15	WBGene00007104	B0024.15	44505997-7864-4503-940c-21b679cddd09	5.30688	0	3.53792	1.76896	9.28705	1.32672	4.86464	3.09568	0	0.727273	0.571429	0.727273	none available
B0024.15	WBGene00007104	B0024.15	6ec740e0-40e3-4351-99d8-a7142e29dda2	1.32672	1.32672	0	0	9.28705	1.32672	4.86464	3.09568	1	0	0	-1	none available
B0024.3	WBGene00007096	B0024.3	ef8ea2a1-ed1d-4cca-b9f1-f0a3e1c1ac45	5.30688	2.65344	2.65344	0	7.29697	2.65344	3.98016	0	1	0.666667		-0.333333	none available
B0024.3	WBGene00007096	B0024.3	ac9ff1b0-d2f2-42fe-9c73-9c49c32a9417	1.32672	0	1.32672	0	7.29697	2.65344	3.98016	0	0	0.333333		0.333333	none available
B0025.1	WBGene00006932	vps-34	c29be08c-4f15-4584-bb85-0e3379d795cd	50.6089	25.3044	13.7066	11.5979	118.327	47.59	41.7754	28.9615	0.531717	0.328102	0.400458	-0.203615	vps-34 encodes an ortholog of the phosphoinositide 3-kinase Concise description: vps-34 encodes an ortholog of the phosphoinositide 3-kinase VPS34 in S. cerevisiae, a protein that regulates multiple steps in endocytosis, and that is required for growth at normal rates during development; in C. elegans, vps-34 is required for vesicular trafficking, including endocytosis, apoptotic cell
B0025.7	WBGene00219778	B0025.7	3c68643e-60b8-406f-b892-f5da9036594b	14.5939	4.29233	2.5754	7.7262	25.8711	7.75655	3.29404	14.8205	0.553382	0.781836	0.521319	0.228454	none available
B0035.13	WBGene00007112	B0035.13	2fcffb65-130c-4506-b6ae-6d0f578b6441	31.8926	0.797315	19.1356	11.9597	282.592	0.797315	124.804	156.991	1	0.153325	0.0761812	-0.846675	none available
B0035.13	WBGene00007112	B0035.13	aed3fa93-a13b-4520-a8b7-dd9562375ac0	196.848	0	70.4765	126.372	282.592	0.797315	124.804	156.991	0	0.564699	0.804964	0.564699	none available
B0035.16	WBGene00007114	mttu-1	4b6be838-659f-4d35-88d4-41f7a6a894f7	2.2112	1.32672	0	0.884481	23.881	6.17402	1.21183	16.4951	0.214888	0	0.0536207	-0.214888	mttu-1 encodes a mitochondrial tRNA 2-thiouridylase orthologous Concise description: mttu-1 encodes a mitochondrial tRNA 2-thiouridylase orthologous to human TRMU (tRNA 5-methylaminomethyl-2-thiouridylate methyltransferase); by homology, nuclear-encoded MTTU-1 is predicted to catalyze the 2-thiolation of uridine at the wobble position (U34) of mitochondrial tRNAs and thereby promote mitochondrial…
B0041.11	WBGene00206362	B0041.11	bad55a06-3737-4f94-8c36-8c72f722de2c	3.98016	1.32672	0	2.65344	9.28705	1.99008	1.99008	5.30688	0.666667	0	0.5	-0.666667	none available
B0041.11	WBGene00206362	B0041.11	4f7885bd-fcad-46cd-929b-26d3331b8aa3	3.98016	0	1.32672	2.65344	9.28705	1.99008	1.99008	5.30688	0	0.666667	0.5	0.666667	none available
B0041.3	WBGene00015008	lmd-2	ac520fa1-b5e7-4741-a2b9-dc972fc4ca88	34.0967	19.7981	6.59937	7.69926	44.1798	29.2576	6.59937	8.32282	0.676682	1	0.925078	0.323318	none available
B0198.1	WBGene00006646	tsp-20	B0198.1.1	4.64352	1.99008	2.65344	0	53.1352	43.4292	7.67752	2.02849	0.0458236	0.345612	0	0.299788	none available
B0205.4	WBGene00015019	B0205.4	8be09df8-f719-4abf-ace0-c2374bf60222	2.40284	1.92227	0.480568	0	17.8297	16.7472	1.08251	0	0.114782	0.44394		0.329158	The B0205.4 gene encodes a homolog of the human gene FUT1, Concise description: The B0205.4 gene encodes a homolog of the human gene FUT1,
B0205.4	WBGene00015019	B0205.4	e1102d6b-1bcd-46f0-9d94-a0e3aadc3731	5.38796	5.38796	0	0	17.8297	16.7472	1.08251	0	0.321724	0		-0.321724	The B0205.4 gene encodes a homolog of the human gene FUT1, Concise description: The B0205.4 gene encodes a homolog of the human gene FUT1,
B0205.4	WBGene00015019	B0205.4	c23b0915-6e36-4028-8ad7-f8a84d59b653	1.80581	1.20388	0.601938	0	17.8297	16.7472	1.08251	0	0.0718855	0.55606		0.484174	The B0205.4 gene encodes a homolog of the human gene FUT1, Concise description: The B0205.4 gene encodes a homolog of the human gene FUT1,
B0205.4	WBGene00015019	B0205.4	e09df416-de60-43db-8114-c32ed8d96918	5.12262	5.12262	0	0	17.8297	16.7472	1.08251	0	0.30588	0		-0.30588	The B0205.4 gene encodes a homolog of the human gene FUT1, Concise description: The B0205.4 gene encodes a homolog of the human gene FUT1,
B0207.12	WBGene00000232	avr-14	11592571-48b9-441d-825d-28b5b4f1b42a	14.0854	2.16698	10.8349	1.08349	36.4848	7.85861	21.3609	7.26527	0.275746	0.507229	0.149133	0.231483	avr-14 encodes an alpha-type subunit of a glutamate-gated chloride Concise description: avr-14 encodes an alpha-type subunit of a glutamate-gated chloride channel homologous to human GLRA2, which when mutated leads to hyperekplexia (OMIM:149400); AVR-14 affects sensitivity to the antiparisitic drug, ivermectin, in parallel with avr-15 and glc-1 and in a genetic pathway with unc-9; it functions in…
B0207.12	WBGene00000232	avr-14	c16247da-dfeb-4931-9c4d-dc693b1859cc	3.09568	1.85741	0.619136	0.619136	36.4848	7.85861	21.3609	7.26527	0.236353	0.0289845	0.0852186	-0.207369	avr-14 encodes an alpha-type subunit of a glutamate-gated chloride Concise description: avr-14 encodes an alpha-type subunit of a glutamate-gated chloride channel homologous to human GLRA2, which when mutated leads to hyperekplexia (OMIM:149400); AVR-14 affects sensitivity to the antiparisitic drug, ivermectin, in parallel with avr-15 and glc-1 and in a genetic pathway with unc-9; it functions in…
B0207.3	WBGene00001676	gpa-14	de3e6116-7cbc-4d64-a38f-17a6a5c9b4b9	2.65344	1.32672	1.32672	0	3.53792	2.2112	1.32672	0	0.6	1		0.4	gpa-14 encodes a member of the G protein alpha subunit family Concise description: gpa-14 encodes a member of the G protein alpha subunit family of heterotrimeric GTPases; gpa-14 is expressed in ASI, ASJ, ASH, ASK, ADE, PHA, PHB ALA, AVA, CAN, DVA, PVQ, RIA, and in vulval muscle, and also exhibits faint
B0212.4	WBGene00015038	nstp-6	53712cb9-6ec1-44aa-93eb-a386274b8d48	1.32672	1.32672	0	0	14.5939	4.70383	4.26159	5.62851	0.282051	0	0	-0.282051	none available
B0213.14	WBGene00015043	cyp-34A8	d36a3e98-04f8-4381-8d0c-ce12b9b6e85d	28.7583	0.991664	5.94998	21.8166	48.7444	0.991664	15.5533	32.1994	1	0.382554	0.677547	-0.617446	none available
B0213.14	WBGene00015043	cyp-34A8	583ca62d-5e0a-47a4-859f-9cd6b8e57ddc	6.31456	0	3.44431	2.87025	48.7444	0.991664	15.5533	32.1994	0	0.221452	0.08914	0.221452	none available
B0213.15	WBGene00015044	cyp-34A9	a86d0e6a-51b9-4552-933d-41074d219c83	27.7651	1.11061	23.3227	3.33182	68.9895	1.70835	60.4928	6.78832	0.650102	0.385545	0.490816	-0.264557	none available
B0213.15	WBGene00015044	cyp-34A9	40a9b243-dc9b-4fb6-8a17-f66665754710	13.337	0	13.337	0	68.9895	1.70835	60.4928	6.78832	0	0.220473	0	0.220473	none available
B0213.15	WBGene00015044	cyp-34A9	1cacdb7a-735e-476d-82d7-7694e1236236	4.18424	0.597749	2.98874	0.597749	68.9895	1.70835	60.4928	6.78832	0.349898	0.0494066	0.0880555	-0.300491	none available
B0218.8	WBGene00015052	clec-52	f6a985d0-e796-480e-9b2f-88af6b210ed1	57.9435	1.20716	35.0076	21.7288	115.592	4.88459	74.9826	33.0709	0.247136	0.466875	0.657038	0.21974	none available
B0222.1	WBGene00015053	B0222.1	e2c65789-9337-4042-a261-48ad937365cd	11.8299	0.909995	10.0099	0.909995	23.881	2.59296	18.1422	3.14577	0.350948	0.551747	0.289276	0.2008	none available
B0222.5	WBGene00015056	B0222.5	7d7fa49c-b01e-42d8-a710-f486ef6222ff	22.6532	0	6.07768	16.5755	103.954	1.93322	24.4678	77.5529	0	0.248394	0.213731	0.248394	none available
B0222.5	WBGene00015056	B0222.5	B0222.5.1	19.9008	0	5.30688	14.5939	103.954	1.93322	24.4678	77.5529	0	0.216892	0.18818	0.216892	none available
B0222.5	WBGene00015056	B0222.5	f296fb91-a9d9-4d7a-9e9f-43ce74116671	4.83306	0.966611	0.966611	2.89983	103.954	1.93322	24.4678	77.5529	0.5	0.0395054	0.0373917	-0.460495	none available
B0222.5	WBGene00015056	B0222.5	81bca565-c8c0-4e9e-86dd-786072e2a671	4.83306	0.966611	0.966611	2.89983	103.954	1.93322	24.4678	77.5529	0.5	0.0395054	0.0373917	-0.460495	none available
B0222.7	WBGene00000718	col-145	7d9fbc90-9b64-4022-ae0c-7f8b18cc84a4	13.2451	0	2.48346	10.7616	54.4177	1.22722	8.67561	44.5148	0	0.286257	0.241754	0.286257	none available
B0222.7	WBGene00000718	col-145	ce3174bb-9877-4784-8f25-c2c21d18d84d	34.3621	1.22722	4.90887	28.226	54.4177	1.22722	8.67561	44.5148	1	0.565824	0.63408	-0.434176	none available
B0222.9	WBGene00015057	gad-3	9b5ac986-e941-4a1e-a80c-a699dbbac7a3	23.1613	3.56328	11.5807	8.01737	39.6368	4.29838	24.9895	10.3489	0.828981	0.46342	0.774707	-0.365561	none available
B0228.5	WBGene00015062	trx-1	0e4d70ea-3cbd-4474-aa68-cc778a09534c	6.96529	2.32176	3.48264	1.16088	11.6088	4.47768	4.80936	2.32176	0.518519	0.724138	0.5	0.205619	trx-1 encodes a thioredoxin, a small redox protein that functions Concise description: trx-1 encodes a thioredoxin, a small redox protein that functions as a protein-disulfide reductase; loss of trx-1 activity via a deletion mutation and RNAi indicates that trx-1 is required for normal adult lifespan; in vitro, TRX-1 is capable of reducing protein disulfide bonds in the presence of a mammalian th…
B0228.5	WBGene00015062	trx-1	ddcf8b42-c781-46fb-be3e-9fb75378491b	1.32672	0	1.32672	0	11.6088	4.47768	4.80936	2.32176	0	0.275862	0	0.275862	trx-1 encodes a thioredoxin, a small redox protein that functions Concise description: trx-1 encodes a thioredoxin, a small redox protein that functions as a protein-disulfide reductase; loss of trx-1 activity via a deletion mutation and RNAi indicates that trx-1 is required for normal adult lifespan; in vitro, TRX-1 is capable of reducing protein disulfide bonds in the presence of a mammalian th…
B0228.5	WBGene00015062	trx-1	c4bc76be-b02e-4c04-8968-e3cf6bf645af	1.32672	1.32672	0	0	11.6088	4.47768	4.80936	2.32176	0.296296	0	0	-0.296296	trx-1 encodes a thioredoxin, a small redox protein that functions Concise description: trx-1 encodes a thioredoxin, a small redox protein that functions as a protein-disulfide reductase; loss of trx-1 activity via a deletion mutation and RNAi indicates that trx-1 is required for normal adult lifespan; in vitro, TRX-1 is capable of reducing protein disulfide bonds in the presence of a mammalian th…
B0228.6	WBGene00015063	B0228.6	531f4db0-e545-4abe-a4d0-83400c71014c	56.5183	51.8085	4.70986	0	81.4607	76.1455	5.31518	0	0.680388	0.886115		0.205728	none available
B0238.12	WBGene00015076	B0238.12	580a1764-ac3e-42df-8bae-5f0ce7cc399a	9.55239	0	8.35834	1.19405	55.7223	2.56537	37.7291	15.4278	0	0.221535	0.0773961	0.221535	B0238.12 encodes a putative secreted TIL-domain protease inhibitor Concise description: B0238.12 encodes a putative secreted TIL-domain protease inhibitor paralogous to SWM-1, ISL-1, and the products of 11 other C. elegans genes; B0238.12 and its relatives are collectively similar to other TIL-domain protease inhibitors from nematodes, insects, and vertebrates; B0238.12 has no obvious function in…
B0238.12	WBGene00015076	B0238.12	97a8e49d-d5d5-48e7-a78c-ec0bb113a4c7	9.55239	1.19405	7.16429	1.19405	55.7223	2.56537	37.7291	15.4278	0.465449	0.189887	0.0773961	-0.275561	B0238.12 encodes a putative secreted TIL-domain protease inhibitor Concise description: B0238.12 encodes a putative secreted TIL-domain protease inhibitor paralogous to SWM-1, ISL-1, and the products of 11 other C. elegans genes; B0238.12 and its relatives are collectively similar to other TIL-domain protease inhibitors from nematodes, insects, and vertebrates; B0238.12 has no obvious function in…
B0240.1	WBGene00004359	rhr-2	4ba8796b-ef6a-47cc-80e9-2f7f4a628f67	1.32672	0	1.32672	0	20.8959	13.28	6.14246	1.47343	0	0.215992	0	0.215992	rhr-2 encodes a predicted transmembrane protein with similarity Concise description: rhr-2 encodes a predicted transmembrane protein with similarity to human Rh blood group antigens proposed to function in inorganic ion transport and metabolism; the role of RHR-2 in C. elegans development or behavior remains unclear, as loss of RHR-2 function via RNA-mediated interference does not result
B0240.3	WBGene00000907	daf-11	B0240.3a.1	1.32672	0	1.32672	0	4.86464	0.810774	4.05387	0	0	0.327273		0.327273	daf-11 encodes a transmembrane guanylate cyclase; daf-11 activity Concise description: daf-11 encodes a transmembrane guanylate cyclase; daf-11 activity is required for a number of processes dependent upon normal chemosensory function, including dauer formation and recovery and chemotaxis to both volatile and non-volatile odorants; daf-11 is also required for axon formation; daf-11 acts together …
B0240.3	WBGene00000907	daf-11	e25bbf8d-93e4-4ed1-bf19-262f17e0a028	1.1056	0	1.1056	0	4.86464	0.810774	4.05387	0	0	0.272727		0.272727	daf-11 encodes a transmembrane guanylate cyclase; daf-11 activity Concise description: daf-11 encodes a transmembrane guanylate cyclase; daf-11 activity is required for a number of processes dependent upon normal chemosensory function, including dauer formation and recovery and chemotaxis to both volatile and non-volatile odorants; daf-11 is also required for axon formation; daf-11 acts together …
B0240.3	WBGene00000907	daf-11	79898d2f-efd9-45f2-ab00-82e733e2afe9	2.43232	0.810774	1.62155	0	4.86464	0.810774	4.05387	0	1	0.4		-0.6	daf-11 encodes a transmembrane guanylate cyclase; daf-11 activity Concise description: daf-11 encodes a transmembrane guanylate cyclase; daf-11 activity is required for a number of processes dependent upon normal chemosensory function, including dauer formation and recovery and chemotaxis to both volatile and non-volatile odorants; daf-11 is also required for axon formation; daf-11 acts together …
B0244.8	WBGene00015083	egg-1	64dbd4bc-2602-458b-877c-0ea57877e234	123.043	4.21381	10.1131	108.716	372.996	6.82691	30.2769	335.892	0.617234	0.334021	0.323664	-0.283213	egg-1 encodes a LDL-receptor repeat-containing protein that Concise description: egg-1 encodes a LDL-receptor repeat-containing protein that is required for fertilization; egg-1 acts redundantly with a similar protein, egg-2, and both proteins are expressed in the developing oocyte; egg-1 is not required for male fertility; egg-1 localizes to the oocyte plasma membrane; the structure and localiza…
B0250.12	WBGene00050927	B0250.12	dec8a41a-a5dc-42cc-831d-655d680d0423	34.3842	29.4722	4.91203	0	50.4154	45.5034	4.91203	0	0.647692	1		0.352308	none available
B0250.3	WBGene00007120	B0250.3	2b40509b-4f25-4f85-b9f9-f3d5f34fc12a	5.41744	0.902907	2.70872	1.80581	22.5543	6.20979	7.51809	8.82638	0.145401	0.360294	0.204593	0.214894	none available
B0250.3	WBGene00007120	B0250.3	51cf1a58-08ec-48fc-a9b1-7284f4f4d464	4.64352	3.09568	0	1.54784	22.5543	6.20979	7.51809	8.82638	0.498516	0	0.175365	-0.498516	none available
B0252.2	WBGene00000211	asm-1	B0252.2.2	46.4352	23.881	3.98016	18.5741	90.217	43.5066	15.8027	30.377	0.548904	0.251866	0.611453	-0.297039	asm-1 encodes a protein similar to human acid sphingomyelinase Concise description: asm-1 encodes a protein similar to human acid sphingomyelinase (ASM) or sphingomyelin phosphodiesterase; the ASM-1 protein has a putative secretory signal peptide at the N-terminus, saposin-like and proline-rich domains and putative N-linked glycosylation sites; asm-1 shows phosphodiesterase activity when expresse…
B0261.2	WBGene00002583	let-363	c5700c9b-a0ef-44cf-87e9-37f9dc71bdb3	9.28705	7.96033	0	1.32672	13.2672	7.96033	0.912121	4.39476	1	0	0.301887	-1	none available
B0261.2	WBGene00002583	let-363	18827cce-1911-48ab-8877-c25a7f2adaa9	0.60808	0	0.30404	0.30404	13.2672	7.96033	0.912121	4.39476	0	0.333333	0.0691824	0.333333	none available
B0261.2	WBGene00002583	let-363	e2b060d2-42d1-4e88-ad8f-efee30dc5798	0.60808	0	0.30404	0.30404	13.2672	7.96033	0.912121	4.39476	0	0.333333	0.0691824	0.333333	none available
B0261.2	WBGene00002583	let-363	8f0f39c7-5ce3-4942-afb4-458551dbcaa5	0.60808	0	0.30404	0.30404	13.2672	7.96033	0.912121	4.39476	0	0.333333	0.0691824	0.333333	none available
B0272.2	WBGene00007128	memb-1	ee01811b-9779-4488-b263-ba7ecac7066f	20.8737	10.4369	3.13106	7.30581	67.4195	52.183	6.01193	9.22463	0.200005	0.520808	0.79199	0.320803	none available
B0273.3	WBGene00015098	snpc-3.1	6862fdbd-a07f-4969-9540-c45cfff878c0	15.6995	1.04664	1.04664	13.6063	23.881	3.3684	1.93112	18.5815	0.310722	0.541985	0.732249	0.231263	none available
B0280.13	WBGene00015107	viro-2	aab7c8d1-0e6a-4280-acb7-7be5444d0d37	12.6038	1.1458	6.87483	4.58322	15.9207	2.25141	9.08603	4.58322	0.508929	0.756637	1	0.247709	none available
B0280.13	WBGene00015107	viro-2	ff47035e-868c-4897-8dbb-2dbc1acb7c77	3.3168	1.1056	2.2112	0	15.9207	2.25141	9.08603	4.58322	0.491071	0.243363	0	-0.247709	none available
B0281.5	WBGene00015112	B0281.5	B0281.5a.1	111.113	107.129	0	3.98413	451.853	436.668	2.71006	12.4747	0.245332	0	0.319378	-0.245332	none available
B0285.8	WBGene00000511	ckb-1	3f2d7c9a-a556-4d0c-8fa0-49af509673a6	20.332	4.0664	2.0332	14.2324	43.1295	12.3527	3.32193	27.4548	0.32919	0.612053	0.518394	0.282863	ckb-1 encodes a putative choline kinase; CKB-1 through CKB-4 Concise description: ckb-1 encodes a putative choline kinase; CKB-1 through CKB-4
B0286.2	WBGene00002252	lat-2	12b31193-664c-4c84-9e17-3deb2bfecade	17.5127	6.36826	6.36826	4.7762	27.5958	7.22553	11.9201	8.45019	0.881356	0.534247	0.565217	-0.347109	lat-2 encodes a predicted transmembrane protein that is homologous Concise description: lat-2 encodes a predicted transmembrane protein that is homologous to vertebrate latrophilins, alpha-latrotoxin binding proteins that are members of the Class B/secretin family of G protein-coupled receptors; by homology, LAT-2 is predicted to function as a peptide hormone receptor that couples ligand binding …
B0303.11	WBGene00015131	B0303.11	6c16bcea-5428-408c-991c-3cb3c1315bbc	23.2545	0	5.05532	18.1992	57.049	3.69697	19.9278	33.4242	0	0.253681	0.544491	0.253681	none available
B0303.11	WBGene00015131	B0303.11	734073f0-94b1-4d56-8ea8-eac28297bddb	1.32672	1.32672	0	0	57.049	3.69697	19.9278	33.4242	0.358867	0	0	-0.358867	none available
B0303.14	WBGene00015132	B0303.14	43d62798-6f53-4399-9bff-96f54c49dbdb	15.57	11.2104	1.8684	2.4912	43.2479	33.3031	3.07675	6.86815	0.336618	0.607265	0.362718	0.270647	none available
B0303.14	WBGene00015132	B0303.14	f5f2e194-335e-446f-8d80-d3bfed59e796	11.811	10.2362	0	1.5748	43.2479	33.3031	3.07675	6.86815	0.307365	0	0.22929	-0.307365	none available
B0303.2	WBGene00015124	anmt-1	edb8e2ff-ff4c-433e-a74e-58fcdd59ab6d	14.406	10.5644	1.9208	1.9208	22.908	16.0417	4.94554	1.9208	0.658557	0.38839	1	-0.270167	none available
B0310.3	WBGene00015139	B0310.3	686d733f-8744-444c-ad9f-e050e5a4ce53	2.65344	0.663361	1.99008	0	3.98016	1.32672	2.65344	0	0.5	0.75		0.25	none available
B0310.6	WBGene00015142	B0310.6	B0310.6.1	2.10064	1.40043	0	0.700214	4.9752	3.0404	0.819987	1.11481	0.460606	0	0.628099	-0.460606	none available
B0310.6	WBGene00015142	B0310.6	b30ca211-ba77-4486-a883-d435ca0ce2de	1.6584	0.829201	0.4146	0.4146	4.9752	3.0404	0.819987	1.11481	0.272727	0.505618	0.371901	0.232891	none available
B0310.6	WBGene00015142	B0310.6	2c26ea42-d99d-4343-a235-6ee418e5ee02	1.21616	0.810774	0.405387	0	4.9752	3.0404	0.819987	1.11481	0.266667	0.494382	0	0.227715	none available
B0331.1	WBGene00007140	cyp-29A4	ea21f836-4034-4474-89c2-b55873469db7	3.98016	3.98016	0	0	15.9207	12.9355	1.16088	1.82424	0.307692	0	0	-0.307692	none available
B0331.1	WBGene00007140	cyp-29A4	12be208b-540d-4d22-8d98-18a900f67444	4.64352	2.32176	1.16088	1.16088	15.9207	12.9355	1.16088	1.82424	0.179487	1	0.636364	0.820513	none available
B0334.15	WBGene00195248	emc-5	bf73bf04-e734-4ef8-ae60-9c94e81c9e58	152.433	85.8235	3.84285	62.7665	304.107	159.183	30.0826	114.841	0.53915	0.127743	0.546551	-0.411407	none available
B0334.15	WBGene00195248	emc-5	44244605-94dd-42aa-ae89-0e911da1fca0	130.376	61.4982	23.3693	45.5087	304.107	159.183	30.0826	114.841	0.386336	0.776837	0.396275	0.390501	none available
B0334.6	WBGene00007146	B0334.6	B0334.6.1	1.6584	1.1056	0.5528	0	8.91114	6.7519	1.09233	1.0669	0.163747	0.506073	0	0.342326	none available
B0334.6	WBGene00007146	B0334.6	bcf3b4ab-5cb5-488d-9e36-f00afac0df6c	2.58711	1.94033	0	0.646776	8.91114	6.7519	1.09233	1.0669	0.287375	0	0.606218	-0.287375	none available
B0344.2	WBGene00006955	wrt-9	22724ac0-4f95-4452-b4d5-154225b201ee	7.73921	4.837	2.9022	0	15.9207	13.0184	2.9022	0	0.37155	1		0.62845	wrt-9 encodes a hedgehog-like protein, with an N-terminal signal Concise description: wrt-9 encodes a hedgehog-like protein, with an N-terminal signal sequence, a Wart domain, and a C-terminal region of proline-rich, low-complexity sequence; the Wart domain is predicted to form a cysteine-crosslinked protein involved in intercellular signalling, and it has subtle similarity to the N-terminal Hedge
B0344.2	WBGene00006955	wrt-9	d52b6635-c3c1-4e2f-aded-affeedb907ca	5.08576	5.08576	0	0	15.9207	13.0184	2.9022	0	0.390658	0		-0.390658	wrt-9 encodes a hedgehog-like protein, with an N-terminal signal Concise description: wrt-9 encodes a hedgehog-like protein, with an N-terminal signal sequence, a Wart domain, and a C-terminal region of proline-rich, low-complexity sequence; the Wart domain is predicted to form a cysteine-crosslinked protein involved in intercellular signalling, and it has subtle similarity to the N-terminal Hedge
B0361.4	WBGene00015158	B0361.4	8c058bd1-fb3b-4321-84cb-365a97573eca	4.64352	0	4.64352	0	7.96033	0.663361	7.29697	0	0	0.636364		0.636364	none available
B0361.4	WBGene00015158	B0361.4	874920d7-ea85-4499-a0ac-ae668988ecac	1.99008	0.663361	1.32672	0	7.96033	0.663361	7.29697	0	1	0.181818		-0.818182	none available
B0379.1	WBGene00007155	B0379.1	4bc70a9a-8f36-48d2-8938-5f56a8d7082e	81.5933	5.58859	20.1189	55.8859	214.929	12.3782	82.2017	120.349	0.451485	0.244751	0.464365	-0.206735	none available
B0395.1	WBGene00003729	nhx-1	f5c64496-772d-4702-9681-30f97769bba2	0.663361	0	0.663361	0	10.6138	2.46391	1.89532	6.25454	0	0.35	0	0.35	nhx-1 encodes a sodium/proton exchanger expressed intracellularly Concise description: nhx-1 encodes a sodium/proton exchanger expressed intracellularly within hypodermal and muscle cells; NHX-1 is required for embryonic viability, and is thought to prevent intracellular acidification by catalysing the electroneutral
B0395.1	WBGene00003729	nhx-1	6a8d814c-5313-48a4-b12e-5df238ba6eb0	8.62369	2.46391	1.23196	4.92782	10.6138	2.46391	1.89532	6.25454	1	0.65	0.787879	-0.35	nhx-1 encodes a sodium/proton exchanger expressed intracellularly Concise description: nhx-1 encodes a sodium/proton exchanger expressed intracellularly within hypodermal and muscle cells; NHX-1 is required for embryonic viability, and is thought to prevent intracellular acidification by catalysing the electroneutral
B0403.2	WBGene00006712	ubc-17	316546c7-27fb-4351-ad9d-d6f21a27aa09	3.98016	1.32672	1.32672	1.32672	7.96033	1.32672	3.80327	2.83034	1	0.348837	0.46875	-0.651163	none available
B0412.1	WBGene00000895	dac-1	be9b6994-34bb-4ec7-a961-05e216c56b9a	3.09568	0	3.09568	0	11.9405	1.32672	9.95041	0	0	0.311111		0.311111	dac-1 encodes the C. elegans ortholog of Dachshund, a transcriptional Concise description: dac-1 encodes the C. elegans ortholog of Dachshund, a transcriptional regulator first described in Drosophila that is a member of the SKI/SNO/DAC family of proteins; dac-1 is expressed at higher levels in the AFD thermosensory neurons as compared to the AWB olfactory neurons and likely plays a role in therm…
B0412.1	WBGene00000895	dac-1	2f872304-6e25-4e7b-b5e1-e13b55f9410a	2.65344	1.32672	1.32672	0	11.9405	1.32672	9.95041	0	1	0.133333		-0.866667	dac-1 encodes the C. elegans ortholog of Dachshund, a transcriptional Concise description: dac-1 encodes the C. elegans ortholog of Dachshund, a transcriptional regulator first described in Drosophila that is a member of the SKI/SNO/DAC family of proteins; dac-1 is expressed at higher levels in the AFD thermosensory neurons as compared to the AWB olfactory neurons and likely plays a role in therm…
B0412.1	WBGene00000895	dac-1	e29f7123-2af9-4794-8ac0-d9b1b8fd662b	3.75904	0	3.75904	0	11.9405	1.32672	9.95041	0	0	0.377778		0.377778	dac-1 encodes the C. elegans ortholog of Dachshund, a transcriptional Concise description: dac-1 encodes the C. elegans ortholog of Dachshund, a transcriptional regulator first described in Drosophila that is a member of the SKI/SNO/DAC family of proteins; dac-1 is expressed at higher levels in the AFD thermosensory neurons as compared to the AWB olfactory neurons and likely plays a role in therm…
B0414.6	WBGene00001600	glh-3	B0414.6.1	16.4071	5.46904	1.82301	9.11506	39.3373	18.3387	2.92861	18.0699	0.298223	0.622483	0.504433	0.32426	glh-3 encodes a predicted DEAD-like RNA helicase; GLH-3 interacts Concise description: glh-3 encodes a predicted DEAD-like RNA helicase; GLH-3 interacts with itself and with CSN-5, KGB-1, ZYX-1, and GLH-1 in vitro, and is expressed in
B0432.9	WBGene00015190	B0432.9	B0432.9.1	4.99732	1.11051	2.22103	1.66577	21.0949	10.1301	5.61259	5.35216	0.109625	0.395723	0.311234	0.286097	none available
B0454.5	WBGene00015196	B0454.5	85210f1f-d074-4fd5-9ddd-45bdbbb32de4	38.696	2.4185	7.25551	29.022	45.1085	2.4185	9.28981	33.4002	1	0.781018	0.868918	-0.218982	none available
B0457.6	WBGene00007180	B0457.6	B0457.6.1	5.30688	3.98016	0	1.32672	32.9911	8.92897	10.1561	13.9061	0.445758	0	0.0954059	-0.445758	none available
B0464.4	WBGene00000268	bre-3	B0464.4a.2	37.1482	3.09568	12.3827	21.6698	139.776	21.4402	34.8472	83.4886	0.144387	0.355344	0.259554	0.210957	bre-3 encodes a protein similar to beta-glycosyltransferases Concise description: bre-3 encodes a protein similar to beta-glycosyltransferases from bacteria that is required for the toxicity of Bacillus thuringiensis Cry5B; BRE-3 may act in a pathway with bre-5 and is expressed and functions in the gut
B0464.8	WBGene00007187	tag-342	2dd1c57a-2fa8-4680-a34b-efd5cd59fe4d	69.0739	31.5523	1.70553	35.8161	193.701	88.5423	18.4316	86.7273	0.356353	0.0925327	0.412974	-0.26382	none available
B0464.8	WBGene00007187	tag-342	10358c71-e739-449c-8c80-47e8a24290df	69.0739	31.4896	12.1895	25.3948	193.701	88.5423	18.4316	86.7273	0.355644	0.661336	0.292812	0.305692	none available
B0491.4	WBGene00007191	lgc-20	d760b411-82b7-488b-a892-910ffa897748	1.59207	1.59207	0	0	8.69002	7.3633	1.32672	0	0.216216	0		-0.216216	none available
B0491.4	WBGene00007191	lgc-20	d79681c2-34f2-4788-8142-62ba2c2e8770	1.92375	1.92375	0	0	8.69002	7.3633	1.32672	0	0.261261	0		-0.261261	none available
B0491.4	WBGene00007191	lgc-20	7d114f18-fc17-4d0e-8d50-c7a9f10ba9a9	3.25047	3.25047	0	0	8.69002	7.3633	1.32672	0	0.441441	0		-0.441441	none available
B0491.4	WBGene00007191	lgc-20	d484e64a-c6bb-40fb-831b-be452395bafa	1.32672	0	1.32672	0	8.69002	7.3633	1.32672	0	0	1		1	none available
B0491.8	WBGene00000529	clh-2	50f2cb65-5df0-454b-a312-846c36551bbe	9.72929	0.748407	8.23247	0.748407	21.2275	0.748407	19.1656	1.31349	1	0.429543	0.569784	-0.570457	clh-2 encodes a chloride channel protein that is required for Concise description: clh-2 encodes a chloride channel protein that is required for embryonic viability; may have two transcripts transcribed from alternative promoters,
B0491.8	WBGene00000529	clh-2	79a53744-2b46-453f-aaae-8bcc42376d32	5.08576	0	4.52068	0.565085	21.2275	0.748407	19.1656	1.31349	0	0.235874	0.430216	0.235874	clh-2 encodes a chloride channel protein that is required for Concise description: clh-2 encodes a chloride channel protein that is required for embryonic viability; may have two transcripts transcribed from alternative promoters,
B0491.8	WBGene00000529	clh-2	efa56bd1-df04-41c1-8c28-159bf80eeda2	4.4224	0	4.4224	0	21.2275	0.748407	19.1656	1.31349	0	0.230746	0	0.230746	clh-2 encodes a chloride channel protein that is required for Concise description: clh-2 encodes a chloride channel protein that is required for embryonic viability; may have two transcripts transcribed from alternative promoters,
B0507.10	WBGene00015227	ddn-1	0353b39d-ab0c-4036-9160-71ac25433678	8.29201	1.18457	4.73829	2.36914	11.9405	1.18457	6.72837	4.02755	1	0.704225	0.588235	-0.295775	none available
B0511.5	WBGene00015231	cutl-14	b19eb3c2-ab21-42a6-8538-b3b6d3ec8a0f	4.4224	2.2112	2.2112	0	12.825	9.28705	3.53792	0	0.238095	0.625		0.386905	none available
B0513.4	WBGene00007196	B0513.4	112ceec5-35df-40cd-8570-85dc8cd43425	142.654	0	15.0629	127.591	383.766	0.409847	38.3027	345.054	0	0.39326	0.369773	0.39326	none available
B0513.4	WBGene00007196	B0513.4	f5863b02-7126-4f09-bbc6-8b6a077876ff	130.493	0	10.4919	120.001	383.766	0.409847	38.3027	345.054	0	0.27392	0.347774	0.27392	none available
B0513.4	WBGene00007196	B0513.4	8b7b7bf2-769f-477b-aedb-8c0da5d6ec24	3.09912	0.206608	0.413217	2.4793	383.766	0.409847	38.3027	345.054	0.504111	0.0107882	0.00718525	-0.493322	none available
B0513.4	WBGene00007196	B0513.4	1228a87e-1ea4-48e7-b8db-d34fdde8ebf8	3.04858	0.203239	0.812955	2.03239	383.766	0.409847	38.3027	345.054	0.495889	0.0212245	0.00589006	-0.474665	none available
B0523.1	WBGene00002212	kin-31	59332faf-2c2a-4b68-b14b-598fa2b35dcc	0.44224	0	0.44224	0	2.2112	1.32672	0.884481	0	0	0.5		0.5	kin-31 encodes a predicted tyrosine protein kinase expressed Concise description: kin-31 encodes a predicted tyrosine protein kinase expressed in the nucleus and cytoplasm of body-wall muscle cells; the expression of kin-31
B0523.1	WBGene00002212	kin-31	3a4be9e9-bfdc-4a09-b777-8a39c3032009	1.32672	1.32672	0	0	2.2112	1.32672	0.884481	0	1	0		-1	kin-31 encodes a predicted tyrosine protein kinase expressed Concise description: kin-31 encodes a predicted tyrosine protein kinase expressed in the nucleus and cytoplasm of body-wall muscle cells; the expression of kin-31
B0523.1	WBGene00002212	kin-31	c9071848-0ce8-49e3-86ee-e5e965d955f5	0.44224	0	0.44224	0	2.2112	1.32672	0.884481	0	0	0.5		0.5	kin-31 encodes a predicted tyrosine protein kinase expressed Concise description: kin-31 encodes a predicted tyrosine protein kinase expressed in the nucleus and cytoplasm of body-wall muscle cells; the expression of kin-31
B0524.6	WBGene00015245	B0524.6	d022598e-ecb5-4ef5-9c81-daa156f76f37	12.051	3.01276	2.00851	7.02978	21.117	7.93269	2.85153	10.3328	0.379791	0.704362	0.680339	0.324571	none available
B0546.3	WBGene00015250	B0546.3	df8cb8a4-9d7d-4d79-902e-58de30cea4c9	2.764	1.382	0.691001	0.691001	9.83985	3.5195	3.82354	2.49682	0.39267	0.180723	0.276753	-0.211947	none available
B0546.3	WBGene00015250	B0546.3	B0546.3a.1	5.30688	1.32672	2.65344	1.32672	9.83985	3.5195	3.82354	2.49682	0.376963	0.693976	0.531365	0.317013	none available
B0564.10	WBGene00006766	unc-30	912192b9-effe-4184-88d8-a0e5fb777ff7	5.63856	5.63856	0	0	26.5344	18.2503	7.14692	1.13719	0.308957	0	0	-0.308957	unc-30 encodes a homeodomain-containing protein that is orthologous Concise description: unc-30 encodes a homeodomain-containing protein that is orthologous to the Pitx family of homeodomain transcription factors; during develpoment, UNC-30 controls the terminal differentiation of all 19 type D GABA-ergic motor neurons by directly regulating the expression of UNC-25/GAD and UNC-47/VGAT, which reg…
B0564.2	WBGene00007202	B0564.2	37f5e0c2-95f4-4be1-9985-fa963c8b9030	16.584	1.27569	1.27569	14.0326	18.5741	2.60241	1.27569	14.696	0.490196	1	0.954861	0.509804	none available
B0564.2	WBGene00007202	B0564.2	170b7466-aed8-45ed-90d7-33674f8a4245	1.32672	1.32672	0	0	18.5741	2.60241	1.27569	14.696	0.509804	0	0	-0.509804	none available
BE0003N10.2	WBGene00015267	chin-1	8fc15125-bbf0-4503-ab6c-fa6a2ada8c53	35.2371	12.292	0.819467	22.1256	64.3776	24.0296	0.819467	39.5285	0.511536	1	0.559738	0.488464	chin-1 encodes a putative GTPase activating protein (GAP) and Concise description: chin-1 encodes a putative GTPase activating protein (GAP) and is orthologous to vertebrate chimaerins; chin-1 negatively regulates CDC-42 during asymmetric division in the embryo; chin-1 restricts both the spatial extent of CDC-42 expression and the recruitment of NMY-2 during the phase in which polarity is maintai…
BE10.5	WBGene00044127	BE10.5	BE10.5.1	2.65344	1.32672	1.32672	0	3.98016	1.32672	2.65344	0	1	0.5		-0.5	none available
BE10.5	WBGene00044127	BE10.5	02ff654f-fc17-48fd-958a-511c4ad38e4b	1.32672	0	1.32672	0	3.98016	1.32672	2.65344	0	0	0.5		0.5	none available
C01A2.1	WBGene00007213	C01A2.1	fb3e0c74-3335-4569-9882-7e12ac3d8432	5.74912	5.74912	0	0	26.5344	25.1635	1.37095	0	0.228471	0		-0.228471	none available
C01A2.1	WBGene00007213	C01A2.1	6567802e-a3e2-4364-aaa0-a53f392e4daa	13.7095	12.3385	1.37095	0	26.5344	25.1635	1.37095	0	0.490334	1		0.509666	none available
C01B10.3	WBGene00015278	C01B10.3	000f36fa-1902-4311-8439-f5f76433aeb5	103.116	0	33.1443	69.9714	118.078	1.13192	38.0801	78.8662	0	0.870386	0.887216	0.870386	C01B10.3 encodes a paralog of IPP-5, and thus may functionally Concise description: C01B10.3 encodes a paralog of IPP-5, and thus may functionally
C01B10.3	WBGene00015278	C01B10.3	3c7b5647-edba-4777-8353-e6973a200a5c	0.663361	0.663361	0	0	118.078	1.13192	38.0801	78.8662	0.586047	0	0	-0.586047	C01B10.3 encodes a paralog of IPP-5, and thus may functionally Concise description: C01B10.3 encodes a paralog of IPP-5, and thus may functionally
C01B10.3	WBGene00015278	C01B10.3	9ec5e8e4-8a55-4c05-9c3b-6fbf08f7a004	3.27995	0.468564	0.468564	2.34282	118.078	1.13192	38.0801	78.8662	0.413953	0.0123047	0.0297063	-0.401649	C01B10.3 encodes a paralog of IPP-5, and thus may functionally Concise description: C01B10.3 encodes a paralog of IPP-5, and thus may functionally
C01B12.1	WBGene00005017	sqt-2	0a39c466-fc89-4d29-ac65-644e804dc703	11.733	1.1733	8.21308	2.3466	108.556	2.49553	82.708	23.3529	0.47016	0.0993022	0.100484	-0.370858	none available
C01B12.4	WBGene00015287	osta-1	ede2a4c8-0449-4eec-ba83-909417132d6f	2.65344	0.530688	0.530688	1.59207	15.9207	1.41517	8.15933	6.34615	0.375	0.0650407	0.250871	-0.309959	none available
C01B12.4	WBGene00015287	osta-1	f0758411-8e39-4af5-b675-230062aef725	5.30688	0.884481	2.65344	1.76896	15.9207	1.41517	8.15933	6.34615	0.625	0.325203	0.278746	-0.299797	none available
C01B12.4	WBGene00015287	osta-1	cf75ae29-f895-4d39-867a-3da8a3b80472	7.96033	0	4.9752	2.98512	15.9207	1.41517	8.15933	6.34615	0	0.609756	0.470383	0.609756	none available
C01B12.5	WBGene00015288	best-4	1da6f32a-8989-4f8c-8454-9c9095d8276b	2.65344	1.32672	0	1.32672	10.6138	1.32672	7.96033	1.32672	1	0	1	-1	none available
C01B12.5	WBGene00015288	best-4	171ce82f-c3f2-4bbc-8855-6443be941e16	6.63361	0	6.63361	0	10.6138	1.32672	7.96033	1.32672	0	0.833333	0	0.833333	none available
C01B9.1	WBGene00007220	C01B9.1	8c1f5097-6487-43c7-8e23-20ab7e395ed5	1.32672	1.32672	0	0	7.96033	2.65344	2.65344	2.65344	0.5	0	0	-0.5	none available
C01B9.1	WBGene00007220	C01B9.1	2b3bb781-3867-479f-8165-4fbad227cc73	6.63361	1.32672	2.65344	2.65344	7.96033	2.65344	2.65344	2.65344	0.5	1	1	0.5	none available
C01C4.1	WBGene00003739	nlp-1	C01C4.1.2	139.306	1.36574	121.551	16.3889	206.968	1.36574	173.249	32.3533	1	0.701596	0.50656	-0.298404	nlp-1 encodes a predicted neuropeptide-like protein of the Concise description: nlp-1 encodes a predicted neuropeptide-like protein of the MSFamide family with similarity to Aplysia californica (sea hare) buccalin, a neuropeptide that regulates acetylcholine-induced muscle contraction; NLP-1 is expressed in the phasmid PHB tail sensory neuron, lateral neurons, head neurons, and the intestine; the…
C01C4.3	WBGene00015293	C01C4.3	deb917bd-2e95-421a-9fa7-dcd4481649cd	15.589	0	14.3898	1.19915	66.0044	2.68852	58.2641	4.22254	0	0.246976	0.283988	0.246976	C01C4.3 encodes a serine/threonine protein kinase.
C01C4.3	WBGene00015293	C01C4.3	a51064ab-17bb-41ba-850c-91a0d090fb47	26.8661	2.06662	23.7662	1.03331	66.0044	2.68852	58.2641	4.22254	0.768683	0.407904	0.244713	-0.360779	C01C4.3 encodes a serine/threonine protein kinase.
C01F1.2	WBGene00015297	sco-1	8bcdaeea-b59b-4789-b368-f43e9b63daa0	91.6339	26.3316	20.012	45.2903	121.332	45.5052	25.5994	50.2272	0.57865	0.781738	0.901708	0.203088	sco-1 is orthologous to the human gene SCO (CYTOCHROME OXIDASE Concise description: sco-1 is orthologous to the human gene SCO (CYTOCHROME OXIDASE DEFICIENT, YEAST) HOMOLOG 1 (SCO1; OMIM:603644), which when mutated leads to early-onset
C01F1.4	WBGene00015299	C01F1.4	ef461ffa-3012-473a-9891-5cac3b2585b1	2.65344	0	1.76896	0.884481	6.63361	2.65344	3.09568	0.884481	0	0.571429	1	0.571429	none available
C01F1.4	WBGene00015299	C01F1.4	C01F1.4.1	1.32672	0	1.32672	0	6.63361	2.65344	3.09568	0.884481	0	0.428571	0	0.428571	none available
C01F1.4	WBGene00015299	C01F1.4	763d4c87-5830-407c-8f0b-c71c0e14c664	2.65344	2.65344	0	0	6.63361	2.65344	3.09568	0.884481	1	0	0	-1	none available
C01G10.10	WBGene00007237	C01G10.10	61b0b15f-f5d8-4c8a-9dd6-8079ea35f318	1.18364	0.789095	0.394548	0	5.30688	4.51779	0.789095	0	0.174664	0.5		0.325336	none available
C01G10.10	WBGene00007237	C01G10.10	9107212e-22d4-4d2b-bcf3-2048d50c67d4	1.18364	0.789095	0.394548	0	5.30688	4.51779	0.789095	0	0.174664	0.5		0.325336	none available
C01G12.1	WBGene00007242	madf-5	98c1cf55-04ef-4257-b82b-496acde205fb	22.5543	11.2771	8.7711	2.50603	26.5344	14.5939	8.7711	3.16939	0.772727	1	0.790698	0.227273	none available
C01G5.9	WBGene00015311	C01G5.9	c9335a02-70f8-483e-b76d-4c007d6726d0	9.28705	7.96033	0	1.32672	13.2672	10.6138	1.32672	1.32672	0.75	0	1	-0.75	none available
C01G5.9	WBGene00015311	C01G5.9	fca0b2c9-a392-4b75-9d9a-7d1a521820ce	0.884481	0.44224	0.44224	0	13.2672	10.6138	1.32672	1.32672	0.0416667	0.333333	0	0.291667	none available
C01G5.9	WBGene00015311	C01G5.9	1b71604c-60c7-466d-a205-711f13030299	0.884481	0.44224	0.44224	0	13.2672	10.6138	1.32672	1.32672	0.0416667	0.333333	0	0.291667	none available
C01G5.9	WBGene00015311	C01G5.9	fa49cb8f-6d84-4715-b2c9-b55c20f4ab43	0.884481	0.44224	0.44224	0	13.2672	10.6138	1.32672	1.32672	0.0416667	0.333333	0	0.291667	none available
C01G6.2	WBGene00007224	C01G6.2	866368bf-6666-47ea-97e4-15308d08af6b	4.64352	2.32176	0	2.32176	28.0823	10.6875	3.98016	13.4146	0.217241	0	0.173077	-0.217241	none available
C01G6.2	WBGene00007224	C01G6.2	3224d6ce-91cc-4055-a9be-ee6de230e29f	17.9107	3.98016	3.98016	9.95041	28.0823	10.6875	3.98016	13.4146	0.372414	1	0.741758	0.627586	none available
C01G6.2	WBGene00007224	C01G6.2	01653dd6-78b1-4663-b939-a5b7e71a92ff	4.86464	4.05387	0	0.810774	28.0823	10.6875	3.98016	13.4146	0.37931	0	0.0604396	-0.37931	none available
C01G6.9	WBGene00007229	C01G6.9	add60546-b5f8-40a8-9455-84ba0872ccc7	18.1319	18.1319	0	0	86.6791	84.0257	1.32672	1.32672	0.215789	0	0	-0.215789	none available
C01G6.9	WBGene00007229	C01G6.9	336a8ab6-2a29-47b1-99fc-f6e87c580c22	23.881	23.881	0	0	86.6791	84.0257	1.32672	1.32672	0.284211	0	0	-0.284211	none available
C01G6.9	WBGene00007229	C01G6.9	1eb8bbba-5a2e-4521-a7d2-e1a81cedfdb2	42.4551	39.8016	1.32672	1.32672	86.6791	84.0257	1.32672	1.32672	0.473684	1	1	0.526316	none available
C01G8.2	WBGene00000540	cln-3.2	8b6d7742-c772-45ba-89bf-0215b1390456	9.28705	6.63361	1.32672	1.32672	68.5657	23.8977	24.4621	20.2058	0.277583	0.0542357	0.0656603	-0.223348	none available
C01G8.3	WBGene00000965	dhs-1	C01G8.3.1	63.0192	23.1071	5.60171	34.3105	138.98	36.417	33.8921	68.6709	0.634513	0.165281	0.499636	-0.469233	none available
C01H6.2	WBGene00007252	mlt-2	6390e178-d3c1-4707-b07a-610220847d29	1.32672	1.32672	0	0	7.96033	3.98016	2.65344	1.32672	0.333333	0	0	-0.333333	none available
C01H6.3	WBGene00007253	C01H6.3	ba424ce3-30cc-4b18-81e4-ca859f6503f7	0.663361	0	0.663361	0	5.97024	3.98016	1.99008	0	0	0.333333		0.333333	none available
C01H6.3	WBGene00007253	C01H6.3	7829fc7e-54e4-43a2-97fd-904f94714fc6	5.30688	3.98016	1.32672	0	5.97024	3.98016	1.99008	0	1	0.666667		-0.333333	none available
C01H6.9	WBGene00007258	hasp-1	c438a06b-95c3-4b79-9fb6-f5d182da341f	2.26587	1.29479	0.323696	0.647393	25.5953	17.6225	0.930273	7.04246	0.0734733	0.347959	0.0919271	0.274485	hasp-1 encodes a homolog of vertebrate haploid germ cell-specific Concise description: hasp-1 encodes a homolog of vertebrate haploid germ cell-specific nuclear protein kinase (haspin); the hasp-1 tm3858 deletion mutation has been classified as lethal or sterile by the National Bioresource Project of Japan; HASP-1 specifically binds GOA-1 in yeast two-hybrid assays; HASP-1 is expressed in PHB sen…
C01H6.9	WBGene00007258	hasp-1	C01H6.9.1	7.13052	5.70441	0	1.4261	25.5953	17.6225	0.930273	7.04246	0.3237	0	0.202501	-0.3237	hasp-1 encodes a homolog of vertebrate haploid germ cell-specific Concise description: hasp-1 encodes a homolog of vertebrate haploid germ cell-specific nuclear protein kinase (haspin); the hasp-1 tm3858 deletion mutation has been classified as lethal or sterile by the National Bioresource Project of Japan; HASP-1 specifically binds GOA-1 in yeast two-hybrid assays; HASP-1 is expressed in PHB sen…
C01H6.9	WBGene00007258	hasp-1	aeeab071-9390-4bd6-9977-07538f88562d	3.15035	2.25025	0.450051	0.450051	25.5953	17.6225	0.930273	7.04246	0.127692	0.483784	0.0639053	0.356092	hasp-1 encodes a homolog of vertebrate haploid germ cell-specific Concise description: hasp-1 encodes a homolog of vertebrate haploid germ cell-specific nuclear protein kinase (haspin); the hasp-1 tm3858 deletion mutation has been classified as lethal or sterile by the National Bioresource Project of Japan; HASP-1 specifically binds GOA-1 in yeast two-hybrid assays; HASP-1 is expressed in PHB sen…
C01H6.9	WBGene00007258	hasp-1	fb9c8730-a189-4759-b277-2fdfed597fc3	7.01996	4.67997	0	2.33999	25.5953	17.6225	0.930273	7.04246	0.265567	0	0.332268	-0.265567	hasp-1 encodes a homolog of vertebrate haploid germ cell-specific Concise description: hasp-1 encodes a homolog of vertebrate haploid germ cell-specific nuclear protein kinase (haspin); the hasp-1 tm3858 deletion mutation has been classified as lethal or sterile by the National Bioresource Project of Japan; HASP-1 specifically binds GOA-1 in yeast two-hybrid assays; HASP-1 is expressed in PHB sen…
C02C2.5	WBGene00015334	sup-18	efbafe39-db5c-4203-9c40-98f8db37d2ad	3.98016	2.65344	1.32672	0	10.6138	3.98016	3.98016	1.32672	0.666667	0.333333	0	-0.333333	none available
C02C2.5	WBGene00015334	sup-18	301d663c-be3f-483a-ac7f-6884bb515e8c	5.30688	1.32672	2.65344	1.32672	10.6138	3.98016	3.98016	1.32672	0.333333	0.666667	1	0.333333	none available
C02D5.1	WBGene00015335	acdh-6	C02D5.1.1	7.29697	5.97024	0.663361	0.663361	35.1897	30.8266	1.42246	2.94066	0.193672	0.466348	0.225583	0.272676	none available
C02F12.10	WBGene00045215	ceh-63	bd919047-164a-4b9b-b3f7-63668f907ac6	2.65344	0	0.884481	1.76896	5.30688	2.65344	0.884481	1.76896	0	1	1	1	ceh-63 encodes a homeobox protein of uncertain affinity, but Concise description: ceh-63 encodes a homeobox protein of uncertain affinity, but with some similarity to vertebrate Hox3 proteins and the D. melanogster homeobox protein ROUGH; ceh-63 is expressed in a single tail neuron of hermaphrodites from late embryo to adult stages, as well as in a uterus cell separate from the vulva
C02F12.10	WBGene00045215	ceh-63	f63de86a-b42b-45d7-8499-d8534ddcc104	2.65344	2.65344	0	0	5.30688	2.65344	0.884481	1.76896	1	0	0	-1	ceh-63 encodes a homeobox protein of uncertain affinity, but Concise description: ceh-63 encodes a homeobox protein of uncertain affinity, but with some similarity to vertebrate Hox3 proteins and the D. melanogster homeobox protein ROUGH; ceh-63 is expressed in a single tail neuron of hermaphrodites from late embryo to adult stages, as well as in a uterus cell separate from the vulva
C02F12.3	WBGene00015354	snet-1	43885b2b-8b92-4172-849f-8965afaac22c	85.0066	2.15207	64.562	18.2926	253.241	3.9521	217.026	32.2626	0.544538	0.297485	0.56699	-0.247053	none available
C02F12.3	WBGene00015354	snet-1	41323cde-6693-40c4-803b-41c2264bf684	24.0217	1.33454	21.3526	1.33454	253.241	3.9521	217.026	32.2626	0.337678	0.0983872	0.0413648	-0.239291	none available
C02F5.10	WBGene00015351	C02F5.10	fd0e8f65-d082-4aae-a3a8-6b9ade522827	4.31184	1.72474	0	2.58711	8.95537	1.72474	0.829201	6.40143	1	0	0.404145	-1	none available
C02F5.10	WBGene00015351	C02F5.10	5051aae4-db6c-4206-99da-37a6659730b0	1.6584	0	0.829201	0.829201	8.95537	1.72474	0.829201	6.40143	0	1	0.129534	1	none available
C02F5.11	WBGene00006628	tsp-2	a3e1ab66-e851-418a-8c96-b89456f8f03c	3.98016	0.995041	1.99008	0.995041	6.63361	0.995041	3.98016	1.6584	1	0.5	0.6	-0.5	none available
C02F5.11	WBGene00006628	tsp-2	d9a4a4a1-8e0b-4d94-935d-45368c7af075	1.32672	0	1.32672	0	6.63361	0.995041	3.98016	1.6584	0	0.333333	0	0.333333	none available
C02F5.5	WBGene00015348	C02F5.5	74860427-90d5-42b0-a256-40a2a68a5b02	10.6138	0	0.964888	9.64888	29.1879	1.01455	4.32071	23.8526	0	0.223317	0.404521	0.223317	none available
C02F5.5	WBGene00015348	C02F5.5	51f6edfd-47b3-4f05-9245-73d53a5665b5	17.2474	1.01455	2.0291	14.2037	29.1879	1.01455	4.32071	23.8526	1	0.469622	0.595479	-0.530378	none available
C02H6.2	WBGene00015362	fbxa-105	C02H6.2.1	21.2275	6.63361	10.6138	3.98016	26.5344	11.9405	10.6138	3.98016	0.555556	1	1	0.444444	This gene encodes a protein containing an F-box, a motif predicted Concise description: This gene encodes a protein containing an F-box, a motif predicted to mediate protein-protein interactions either with homologs of yeast Skp-1p or with other proteins; this gene's encoded protein also contains an FTH/DUF38 motif,
C02H6.2	WBGene00015362	fbxa-105	8771ecef-bf0d-4ea4-98bb-2abbd17912e5	3.98016	3.98016	0	0	26.5344	11.9405	10.6138	3.98016	0.333333	0	0	-0.333333	This gene encodes a protein containing an F-box, a motif predicted Concise description: This gene encodes a protein containing an F-box, a motif predicted to mediate protein-protein interactions either with homologs of yeast Skp-1p or with other proteins; this gene's encoded protein also contains an FTH/DUF38 motif,
C03F11.4	WBGene00015390	C03F11.4	4c5d8a18-aa0e-45d3-a4de-8bf61b598e9d	1.76896	0.589654	0.589654	0.589654	8.84481	3.2431	1.03189	3.2431	0.181818	0.571429	0.181818	0.38961	none available
C03F11.4	WBGene00015390	C03F11.4	1b99b1bf-fd74-4cb9-adde-99e10b8e0aa2	1.99008	1.99008	0	0	8.84481	3.2431	1.03189	3.2431	0.613636	0	0	-0.613636	none available
C03F11.4	WBGene00015390	C03F11.4	9dad2482-2e66-4f9e-9ce5-0c07da365c13	0.663361	0.663361	0	0	8.84481	3.2431	1.03189	3.2431	0.204545	0	0	-0.204545	none available
C03F11.4	WBGene00015390	C03F11.4	c25fa5e0-c733-448b-b0a8-b28afbac0877	0.44224	0	0.44224	0	8.84481	3.2431	1.03189	3.2431	0	0.428571	0	0.428571	none available
C03G6.5	WBGene00015393	C03G6.5	907cae67-55f8-4dc2-94ce-076b52af6baa	159.662	0	151.715	7.947	228.824	0.68571	220.191	7.947	0	0.689017	1	0.689017	none available
C03G6.5	WBGene00015393	C03G6.5	763d842c-51a8-459d-8df3-71d2ce6044f2	8.91424	0.68571	8.22852	0	228.824	0.68571	220.191	7.947	1	0.03737	0	-0.96263	none available
C03H12.1	WBGene00007284	C03H12.1	d4afcc04-4632-4ed7-9e66-2cdd276e96d0	49.0887	23.881	18.5741	6.63361	71.6429	39.6121	18.5741	13.4567	0.602871	1	0.492958	0.397129	none available
C03H12.1	WBGene00007284	C03H12.1	368e12bd-b421-40a8-8dd4-76c76ef02b74	9.28705	9.28705	0	0	71.6429	39.6121	18.5741	13.4567	0.23445	0	0	-0.23445	none available
C04A11.1	WBGene00007285	C04A11.1	101df0b4-1489-43e6-99bd-806128d64ab7	1.32672	1.32672	0	0	8.62369	4.3487	4.27499	0	0.305085	0		-0.305085	none available
C04A11.1	WBGene00007285	C04A11.1	eb3f68bd-0c94-49d8-80c8-9dedeb4a779a	1.32672	1.32672	0	0	8.62369	4.3487	4.27499	0	0.305085	0		-0.305085	none available
C04A11.1	WBGene00007285	C04A11.1	ae0e8d26-8143-48f8-99e0-987755ef188c	3.09568	1.03189	2.06379	0	8.62369	4.3487	4.27499	0	0.237288	0.482759		0.24547	none available
C04A11.3	WBGene00007287	gck-4	590e6678-8143-4afb-b40c-e575373c6d52	21.2275	14.5939	6.63361	0	87.5636	70.6626	12.1047	4.79622	0.20653	0.548018	0	0.341489	none available
C04A11.3	WBGene00007287	gck-4	d1886324-9b7a-4a0c-84cd-92c528ca55f1	36.9271	32.935	2.99409	0.998029	87.5636	70.6626	12.1047	4.79622	0.466087	0.247349	0.208086	-0.218738	none available
C04A11.4	WBGene00000074	adm-2	61e9df22-7369-4326-b420-22e2117acedb	3.3168	0	3.3168	0	29.1879	13.0403	10.2719	5.21237	0	0.322902	0	0.322902	adm-2 encodes a protein containing a snake venom disintegrin-domain Concise description: adm-2 encodes a protein containing a snake venom disintegrin-domain and a metalloprotease-like domain (i.e., a protein of the ADAM family); like ADM-1, ADM-2 is homologous to a mammalian sperm glycoprotein (PH-30/fertilin) implicated in sperm-egg fusion, and ADM-2 might thus be a fusogenic protein mediating t…
C04A11.5	WBGene00007288	C04A11.5	5e658c72-3ff1-40f4-8302-50127f3360fc	23.3061	0.832359	22.4737	0	63.2625	0.832359	62.4301	0	1	0.359982		-0.640018	none available
C04A11.5	WBGene00007288	C04A11.5	f50e7a54-9ce6-43ac-b377-dcfa78f37095	32.5931	0	32.5931	0	63.2625	0.832359	62.4301	0	0	0.522074		0.522074	none available
C04C3.5	WBGene00001119	dyf-3	C04C3.5c.1	2.65344	2.65344	0	0	11.9405	9.30284	0.821303	1.81634	0.285229	0	0	-0.285229	dyf-3 encodes an ortholog of zebrafish cluap1 (also qilin, Concise description: dyf-3 encodes an ortholog of zebrafish cluap1 (also qilin, and like PKD2 required to suppress kidney cysts) and human clusterin-associated protein 1 (CLUAP1); DYF-3 is predicted to have two coiled-coil domains; DYF-3 is required for normal assembly of middle and distal ciliary segments, with dyf-3 mutants showing trun…
C04C3.5	WBGene00001119	dyf-3	b531bd41-00b8-4a5b-b349-603ac308c801	1.99008	1.99008	0	0	11.9405	9.30284	0.821303	1.81634	0.213922	0	0	-0.213922	dyf-3 encodes an ortholog of zebrafish cluap1 (also qilin, Concise description: dyf-3 encodes an ortholog of zebrafish cluap1 (also qilin, and like PKD2 required to suppress kidney cysts) and human clusterin-associated protein 1 (CLUAP1); DYF-3 is predicted to have two coiled-coil domains; DYF-3 is required for normal assembly of middle and distal ciliary segments, with dyf-3 mutants showing trun…
C04C3.5	WBGene00001119	dyf-3	7b323ab1-3147-4183-9597-7b484a077057	5.74912	4.10652	0.821303	0.821303	11.9405	9.30284	0.821303	1.81634	0.441426	1	0.452174	0.558574	dyf-3 encodes an ortholog of zebrafish cluap1 (also qilin, Concise description: dyf-3 encodes an ortholog of zebrafish cluap1 (also qilin, and like PKD2 required to suppress kidney cysts) and human clusterin-associated protein 1 (CLUAP1); DYF-3 is predicted to have two coiled-coil domains; DYF-3 is required for normal assembly of middle and distal ciliary segments, with dyf-3 mutants showing trun…
C04E12.12	WBGene00015441	arrd-21	41921a75-9b1f-4dee-b49a-5ab869595272	7.29697	1.45939	4.37818	1.45939	10.6138	1.45939	7.69498	1.45939	1	0.568966	1	-0.431034	none available
C04E12.12	WBGene00015441	arrd-21	c9d25182-3560-46a8-97bb-0b8443b9333e	2.65344	0	2.65344	0	10.6138	1.45939	7.69498	1.45939	0	0.344828	0	0.344828	none available
C04E6.13	WBGene00015427	C04E6.13	1520705a-54af-43c5-95aa-49cb585d7b49	44.5557	0	37.0039	7.55182	124.712	0.8948	106.422	17.3946	0	0.347708	0.434147	0.347708	none available
C04E6.13	WBGene00015427	C04E6.13	65823496-0f6b-40f8-abd1-6fbf9deb3d71	67.11	0.8948	56.3724	9.8428	124.712	0.8948	106.422	17.3946	1	0.529704	0.565853	-0.470296	none available
C04E7.2	WBGene00015429	sor-3	C04E7.2.1	23.881	15.5226	4.7762	3.58215	52.8793	28.8911	16.51	7.47819	0.53728	0.289291	0.479013	-0.247989	sor-3 encodes a novel protein that contains an MBT (malignant Concise description: sor-3 encodes a novel protein that contains an MBT (malignant brain tumor) domain related to the MBT domains found in the Sex comb on midleg (SCM) and Sfmbt Polycomb group proteins; during development, SOR-3 activity is required to specify the correct number of dopaminergic and serotonergic neurons in males, as wel…
C04E7.5	WBGene00045270	C04E7.5	7382df91-dc99-4a7e-b039-c7bf3a38711d	2.65344	0	1.32672	1.32672	3.98016	1.32672	1.32672	1.32672	0	1	1	1	none available
C04E7.5	WBGene00045270	C04E7.5	e2367ddb-060b-4148-9ea6-7d9ab3a74a9c	1.32672	1.32672	0	0	3.98016	1.32672	1.32672	1.32672	1	0	0	-1	none available
C04F1.3	WBGene00002989	lim-7	2ddc1c20-7cb8-4560-bd16-b8cc79f56633	10.6138	10.6138	0	0	58.3757	44.8137	10.9823	2.57974	0.236842	0	0	-0.236842	lim-7 encodes one of seven C. elegans LIM-homeodomain (LIM-HD) Concise description: lim-7 encodes one of seven C. elegans LIM-homeodomain (LIM-HD) proteins and the sole C. elegans member of the Islet subclass of LIM-HD transcription factors; loss of lim-7 activity results in L1 larval lethality characterized by locomotion and morphological defects, a detached pharynx, body cavity vacuolization, a…
C04F12.1	WBGene00007297	C04F12.1	4c5a9c04-7eed-4d5f-9a8c-bc58c18fdf2b	39.5805	9.49932	8.70771	21.3735	78.0554	15.3289	22.253	40.4736	0.619702	0.391305	0.528085	-0.228397	none available
C04F12.9	WBGene00007303	rnh-1.3	C04F12.9.2	2.65344	0	0.663361	1.99008	12.1616	3.98016	1.76896	6.41248	0	0.375	0.310345	0.375	rnh-1.3 is one of four C. elegans genes that can encode an Concise description: rnh-1.3 is one of four C. elegans genes that can encode an RNase H ribonuclease; rnh-1.3 transcripts are expressed from the L3 larval stage
C04F12.9	WBGene00007303	rnh-1.3	0399c514-2bf5-492e-9987-09d4e788b42f	1.76896	1.76896	0	0	12.1616	3.98016	1.76896	6.41248	0.444444	0	0	-0.444444	rnh-1.3 is one of four C. elegans genes that can encode an Concise description: rnh-1.3 is one of four C. elegans genes that can encode an RNase H ribonuclease; rnh-1.3 transcripts are expressed from the L3 larval stage
C04F5.3	WBGene00006782	unc-46	12cffe41-e551-4abf-997b-08c50c2ee79e	5.74912	2.87456	2.87456	0	7.51809	2.87456	4.64352	0	1	0.619048		-0.380952	unc-46 encodes a type I transmembrane protein that contains Concise description: unc-46 encodes a type I transmembrane protein that contains a single motif similar to the LAMP (lysosomal associated membrane glycoprotein) domain; UNC-46 and UNC-47, the C. elegans vesicular GABA transporter, are required in GABAergic neurons for loading GABA into synaptic vesicles and thus, for all GABA-mediated be…
C04F5.3	WBGene00006782	unc-46	28c64e9a-d5ba-49ab-b5dd-f93fe956fadb	1.76896	0	1.76896	0	7.51809	2.87456	4.64352	0	0	0.380952		0.380952	unc-46 encodes a type I transmembrane protein that contains Concise description: unc-46 encodes a type I transmembrane protein that contains a single motif similar to the LAMP (lysosomal associated membrane glycoprotein) domain; UNC-46 and UNC-47, the C. elegans vesicular GABA transporter, are required in GABAergic neurons for loading GABA into synaptic vesicles and thus, for all GABA-mediated be…
C04G2.10	WBGene00007309	C04G2.10	35a3f209-2f22-47dd-91a7-15501ed70045	2.94827	0	2.2112	0.737067	15.6258	0.989776	9.84862	4.78743	0	0.224519	0.153959	0.224519	none available
C04G2.10	WBGene00007309	C04G2.10	3bd621fc-37fd-4ff1-b287-64571c15f8a1	6.92843	0.989776	2.96933	2.96933	15.6258	0.989776	9.84862	4.78743	1	0.301497	0.620235	-0.698503	none available
C04G6.1	WBGene00003402	mpk-2	16c73832-649a-4d9a-9160-6c6c976ee6aa	1.32672	1.32672	0	0	34.4947	4.36925	13.9433	16.1822	0.30365	0	0	-0.30365	mpk-2 encodes a mitogen activated protein (MAP) kinase; by Concise description: mpk-2 encodes a mitogen activated protein (MAP) kinase; by homology, MPK-2 is predicted to function as a serine/threonine kinase that acts downstream of a receptor tyrosine kinase in a cell signaling pathway; however, as loss of mpk-2 activity via large-scale RNAi screens does not produce any obvious abnormalities, th…
C04G6.4	WBGene00015454	C04G6.4	c1046c78-cdc8-49ca-aa02-3bdecce71ba5	9.36509	0	3.1217	6.24339	49.3644	16.1894	14.2351	18.94	0	0.219296	0.32964	0.219296	none available
C05A9.2	WBGene00007317	C05A9.2	cf3f9118-3fdf-4345-9f34-c418f8578fc1	12.3928	11.7043	0.688488	0	35.1149	31.0181	4.09676	0	0.377337	0.168057		-0.20928	none available
C05B5.3	WBGene00004100	pqn-8	7158bf47-19d2-44fb-b94d-54d997451fba	26.5786	9.56831	11.6946	5.31573	50.4154	14.1312	24.8725	11.4117	0.677106	0.470182	0.465814	-0.206925	The protein product of this gene is predicted to contain a Concise description: The protein product of this gene is predicted to contain a glutamine/asparagine (Q/N)-rich ('prion') domain, by the algorithm of Michelitsch
C05C10.7	WBGene00007334	C05C10.7	c1223f27-4343-4b5b-8b08-116fb77b532a	31.3991	0	7.57908	23.82	88.8903	4.55739	17.1251	67.2078	0	0.442571	0.354423	0.442571	none available
C05C10.7	WBGene00007334	C05C10.7	aa65f2e9-5af9-4f5c-b58b-ab4b6ed987bd	7.51809	1.50362	0.751809	5.26266	88.8903	4.55739	17.1251	67.2078	0.32993	0.0439009	0.0783043	-0.286029	none available
C05C10.7	WBGene00007334	C05C10.7	8cf46f2c-17f9-4a05-ad43-c58964b5b3e0	16.1418	1.89903	2.84855	11.3942	88.8903	4.55739	17.1251	67.2078	0.416693	0.166337	0.169537	-0.250356	none available
C05D10.2	WBGene00015478	mapk-15	a735bce9-6187-40b3-a5f2-9e72482fc8cc	9.06593	4.0293	5.03663	0	41.1284	27.0584	14.0699	0	0.148911	0.357971		0.20906	none available
C05D11.13	WBGene00015488	C05D11.13	395454e8-a33b-431c-be0e-68201b7c7eea	10.6472	4.9687	2.83926	2.83926	30.5917	9.87034	14.0721	6.64923	0.503397	0.201765	0.427006	-0.301633	none available
C05D11.4	WBGene00002881	let-756	63682084-c15d-47ab-b25b-5bff5f0fb984	5.97024	0	3.7314	2.23884	15.9207	0.862369	10.2323	4.82595	0	0.364668	0.463918	0.364668	let-756 encodes an fibroblast growth factor (FGF)-like ligand Concise description: let-756 encodes an fibroblast growth factor (FGF)-like ligand that is required for progression through early larval development; LET-756 is expressed from late embryogenesis to adulthood, with a peak of expression in larvae; with EGL-17, LET-756 is redundantly required to activate EGL-15/FGFR, which in turn activat…
C05D11.4	WBGene00002881	let-756	e68c425f-1969-42e8-8e1f-62d26b86f17a	8.62369	0.862369	5.17421	2.58711	15.9207	0.862369	10.2323	4.82595	1	0.505673	0.536082	-0.494327	let-756 encodes an fibroblast growth factor (FGF)-like ligand Concise description: let-756 encodes an fibroblast growth factor (FGF)-like ligand that is required for progression through early larval development; LET-756 is expressed from late embryogenesis to adulthood, with a peak of expression in larvae; with EGL-17, LET-756 is redundantly required to activate EGL-15/FGFR, which in turn activat…
C05D12.1	WBGene00007339	C05D12.1	99262b91-a948-4418-9d48-f90ccc908f5d	8.18145	7.2724	0.90905	0	14.5939	11.6064	0.90905	2.07853	0.626588	1	0	0.373412	none available
C05D12.1	WBGene00007339	C05D12.1	6cf864ab-c67a-492e-9dfb-0ff5af688643	3.75904	3.00723	0	0.751809	14.5939	11.6064	0.90905	2.07853	0.259102	0	0.361702	-0.259102	none available
C05D12.3	WBGene00014666	C05D12.3	29f5da5b-6f40-49d3-820f-92de72e1c04f	11.2971	0	3.76571	7.53142	75.6231	3.47138	12.3866	59.7651	0	0.304014	0.126017	0.304014	none available
C05D12.4	WBGene00007341	C05D12.4	90d6305a-6360-4b5e-bbd6-44a65aab7cd1	38.7403	36.6462	1.04703	1.04703	50.7692	48.6751	1.04703	1.04703	0.752873	1	1	0.247127	none available
C05D2.4	WBGene00000239	bas-1	18107677-b2f0-4c79-ad75-ed459cafd107	7.78343	1.79618	1.79618	4.19108	97.6909	13.7467	4.56854	79.3757	0.130662	0.393162	0.0528005	0.2625	bas-1 encodes a serotonin- and dopamine-synthetic aromatic Concise description: bas-1 encodes a serotonin- and dopamine-synthetic aromatic amino acid decarboxylase (AAADC) that is required for the synthesis of serotonin from 5-hydroxytryptophan in vivo; mutations of bas-1 impair the turning step in
C05D2.5	WBGene00001514	xnd-1	C05D2.5.1	54.1007	7.82179	10.4291	35.8499	90.7867	14.6784	13.8127	62.2956	0.532879	0.755036	0.57548	0.222158	none available
C05E4.1	WBGene00005643	srp-2	b2787b61-13ee-4a33-a88f-859026171919	68.5725	14.3918	14.3918	39.789	109.54	31.1248	21.0192	57.3958	0.462389	0.684695	0.693239	0.222306	srp-2 encodes an ovalbumin-like serpin (ov-serpin), that is Concise description: srp-2 encodes an ovalbumin-like serpin (ov-serpin), that is a member of the serine protease inhibitor superfamily; SRP-2 is predicted to function as a suicide substrate that inhibits the proteolytic activity of serine proteases, and in vitro, recombinant SRP-2 is able to inhibit granzyme B activity; srp-2 expression
C05E4.14	WBGene00005228	srh-2	775d46ff-4e7a-42a2-ad9f-0bb3a099e364	6.63361	3.3168	3.3168	0	7.96033	3.3168	4.64352	0	1	0.714286		-0.285714	none available
C05E4.14	WBGene00005228	srh-2	C05E4.14b.1	1.32672	0	1.32672	0	7.96033	3.3168	4.64352	0	0	0.285714		0.285714	none available
C05E7.2	WBGene00007344	C05E7.2	4482d067-c4d9-4899-a3f4-4f03aabd707e	8.22567	6.85473	0	1.37095	47.762	25.7846	14.8902	7.08711	0.265846	0	0.193442	-0.265846	none available
C05E7.3	WBGene00007345	C05E7.3	17c9a6c0-b261-4b79-bc4c-660c78ca43e1	6.96529	0.995041	4.9752	0.995041	8.95537	0.995041	6.96529	0.995041	1	0.714286	1	-0.285714	none available
C05E7.3	WBGene00007345	C05E7.3	3331a6cc-3ef5-4540-a01e-5f93badb699f	1.6584	0	1.6584	0	8.95537	0.995041	6.96529	0.995041	0	0.238095	0	0.238095	none available
C05G5.2	WBGene00007348	C05G5.2	35384d4d-9bd4-4cd1-9ee0-34c8f10830cc	8.18882	3.50949	2.33966	2.33966	43.1184	22.6069	5.82293	14.6886	0.15524	0.401801	0.159284	0.246561	none available
C06A1.4	WBGene00014667	C06A1.4	8a2c08be-3458-474d-aa75-45367c8b9ce3	20.9401	8.0065	1.23177	11.7018	25.4952	10.2477	1.23177	14.0157	0.781296	1	0.834909	0.218704	none available
C06A12.3	WBGene00007357	C06A12.3	9ea7fec2-89bb-4145-8b28-5d23ebfbd9d3	19.0158	3.27859	3.93431	11.8029	132.554	6.307	18.8961	107.351	0.519833	0.208208	0.109947	-0.311625	none available
C06A12.3	WBGene00007357	C06A12.3	0feea834-db72-44e6-9742-f56b43d690cc	48.4174	0	6.24741	42.17	132.554	6.307	18.8961	107.351	0	0.330619	0.392823	0.330619	none available
C06A5.11	WBGene00004803	sir-2.4	a08f51dc-d94c-4b6c-a852-c6ffe27635f3	55.559	18.8691	14.676	22.0139	94.8606	44.8377	20.8963	29.1265	0.420831	0.702323	0.755804	0.281493	none available
C06A8.9	WBGene00001615	glr-4	8fe1f09e-bbea-4191-9c90-9be8baa44244	3.13589	2.61324	0	0.522648	15.4382	10.9268	2.14214	2.36929	0.239159	0	0.220593	-0.239159	glr-4 encodes a putative non-NMDA ionotropic glutamate receptor Concise description: glr-4 encodes a putative non-NMDA ionotropic glutamate receptor subunit, most closely related to GLR-3 and less so to GLR-7, possibly of the kainate subfamily; glr-4 is expressed in various sensory neurons and interneurons from embyrogenesis
C06A8.9	WBGene00001615	glr-4	27c12ab7-a3db-4294-9384-9053e709cb13	6.12101	3.6726	1.8363	0.612101	15.4382	10.9268	2.14214	2.36929	0.33611	0.857229	0.258348	0.521119	glr-4 encodes a putative non-NMDA ionotropic glutamate receptor Concise description: glr-4 encodes a putative non-NMDA ionotropic glutamate receptor subunit, most closely related to GLR-3 and less so to GLR-7, possibly of the kainate subfamily; glr-4 is expressed in various sensory neurons and interneurons from embyrogenesis
C06B3.8	WBGene00001552	gcy-32	34ec0899-b341-4f47-aead-d824ec2e3171	3.69271	1.2309	2.4618	0	7.9161	1.65656	6.25954	0	0.743048	0.393288		-0.34976	gcy-32 encodes a soluble guanylate cyclase; a gcy-32::gfp reporter Concise description: gcy-32 encodes a soluble guanylate cyclase; a gcy-32::gfp reporter
C06B3.8	WBGene00001552	gcy-32	3aa39785-0c7b-4c46-8d7d-b47656766a1d	1.92375	0	1.92375	0	7.9161	1.65656	6.25954	0	0	0.30733		0.30733	gcy-32 encodes a soluble guanylate cyclase; a gcy-32::gfp reporter Concise description: gcy-32 encodes a soluble guanylate cyclase; a gcy-32::gfp reporter
C06B8.1	WBGene00007367	nhr-150	97c4b2ef-b0a0-49ee-9b0d-c3d2f832503d	2.32176	2.32176	0	0	10.6138	9.28705	1.32672	0	0.25	0		-0.25	none available
C06B8.1	WBGene00007367	nhr-150	bd239896-c61f-48b5-a0d1-c729ba9ce8ba	2.32176	2.32176	0	0	10.6138	9.28705	1.32672	0	0.25	0		-0.25	none available
C06B8.1	WBGene00007367	nhr-150	c0b20ba8-8473-4423-b06d-f7da490176cd	2.65344	1.32672	1.32672	0	10.6138	9.28705	1.32672	0	0.142857	1		0.857143	none available
C06B8.2	WBGene00007368	C06B8.2	b7e8816c-4fb5-4105-86e7-3c5160e4d719	2.43232	2.43232	0	0	18.3846	11.056	2.08485	5.24371	0.22	0	0	-0.22	none available
C06B8.2	WBGene00007368	C06B8.2	C06B8.2b.2	6.63361	1.32672	1.32672	3.98016	18.3846	11.056	2.08485	5.24371	0.12	0.636364	0.759036	0.516364	none available
C06C3.4	WBGene00007375	C06C3.4	66213c67-960d-4117-831f-cfb77640007b	13.5104	12.6097	0.900696	0	30.5146	29.6139	0.900696	0	0.425805	1		0.574195	none available
C06C3.4	WBGene00007375	C06C3.4	8ac26b86-0d91-4484-a695-4d62077874b1	6.0808	6.0808	0	0	30.5146	29.6139	0.900696	0	0.205336	0		-0.205336	none available
C06C6.4	WBGene00003653	nhr-63	99449fb9-0d32-4624-b407-9d3c998c228f	3.98016	2.65344	1.32672	0	6.63361	2.65344	3.98016	0	1	0.333333		-0.666667	none available
C06C6.4	WBGene00003653	nhr-63	12ce9f03-ab23-4517-b2d5-08114d137128	1.32672	0	1.32672	0	6.63361	2.65344	3.98016	0	0	0.333333		0.333333	none available
C06C6.4	WBGene00003653	nhr-63	068b1811-e164-4b0c-bd82-e63b08465763	1.32672	0	1.32672	0	6.63361	2.65344	3.98016	0	0	0.333333		0.333333	none available
C06E1.10	WBGene00015525	rha-2	C06E1.10.1	1.32672	0	0.663361	0.663361	7.73921	3.21361	2.95564	1.56995	0	0.224439	0.422535	0.224439	rha-2 encodes a DEAH helicase orthologous to the Drosophila Concise description: rha-2 encodes a DEAH helicase orthologous to the Drosophila KURZ, the human KIAA1517, and the S. cerevisiae ECM16 proteins; rha-2 functions in a number of different biological processes, including germline development, body wall muscle organization, and adult lifespan determination; RHA-2 can be phosphorylated by mur…
C06E1.3	WBGene00015519	doxa-1	a4f21fdf-d270-435b-8b20-1744589299f0	3.53792	1.17931	1.76896	0.589654	9.72929	3.9591	3.15886	2.61132	0.297872	0.56	0.225806	0.262128	none available
C06E1.3	WBGene00015519	doxa-1	C06E1.3.1	4.86464	2.7798	1.3899	0.694949	9.72929	3.9591	3.15886	2.61132	0.702128	0.44	0.266129	-0.262128	none available
C06E2.1	WBGene00015527	C06E2.1	d168cc04-b586-4130-a716-ee6a88a12d47	1.99008	1.99008	0	0	6.63361	5.30688	1.32672	0	0.375	0		-0.375	none available
C06E2.1	WBGene00015527	C06E2.1	5b9779d1-a32f-4131-9b86-327c9b7502ba	1.99008	1.99008	0	0	6.63361	5.30688	1.32672	0	0.375	0		-0.375	none available
C06E2.1	WBGene00015527	C06E2.1	579e08a1-de42-47d7-b975-a0cf1453c1f7	2.65344	1.32672	1.32672	0	6.63361	5.30688	1.32672	0	0.25	1		0.75	none available
C06E4.3	WBGene00015532	C06E4.3	a27becfc-d742-4a67-87fa-5fa5e1eac6e3	10.9454	2.73636	8.20909	0	45.7719	2.73636	40.5027	2.20115	1	0.20268	0	-0.79732	none available
C06E4.3	WBGene00015532	C06E4.3	c7075e08-7d23-4216-ae57-78ec3ceb5e64	24.2127	0	22.0115	2.20115	45.7719	2.73636	40.5027	2.20115	0	0.543458	1	0.543458	none available
C06E7.88	WBGene00189995	C06E7.88	bb20b468-8941-4d05-bdb5-f510ee39227a	1.32672	1.32672	0	0	6.6336	5.74912	0.884481	0	0.230769	0		-0.230769	none available
C06E7.88	WBGene00189995	C06E7.88	c3619100-57bb-4110-a769-3698db74741d	3.09568	3.09568	0	0	6.6336	5.74912	0.884481	0	0.538462	0		-0.538462	none available
C06E7.88	WBGene00189995	C06E7.88	235e6fc0-6f43-421d-92c3-97292015d9a5	1.76896	0.884481	0.884481	0	6.6336	5.74912	0.884481	0	0.153846	1		0.846154	none available
C06G1.1	WBGene00015545	C06G1.1	62c3a29a-21f3-460e-8a19-a054d85a180d	2.65344	1.32672	1.32672	0	33.168	28.917	4.25104	0	0.0458803	0.312094		0.266213	none available
C06H2.7	WBGene00007391	C06H2.7	C06H2.7a.1	31.8413	17.2474	0	14.5939	47.7067	28.5661	1.92375	17.2168	0.603771	0	0.847655	-0.603771	none available
C06H2.7	WBGene00007391	C06H2.7	80757290-a53f-4b5b-ba15-56d0480e563f	1.49256	0.746281	0.746281	0	47.7067	28.5661	1.92375	17.2168	0.0261247	0.387931	0	0.361806	none available
C06H5.2	WBGene00007393	fbxa-157	a3da4b07-990c-434d-8122-dd97a33cbf48	6.41248	0.916069	3.66428	1.83214	15.9207	7.18483	5.68753	3.0483	0.127501	0.644265	0.601036	0.516765	This gene encodes a protein containing an F-box, a motif predicted Concise description: This gene encodes a protein containing an F-box, a motif predicted to mediate protein-protein interactions either with homologs of yeast Skp-1p or with other proteins; this gene's encoded protein also contains an FTH/DUF38 motif,
C06H5.2	WBGene00007393	fbxa-157	6f03f583-1425-4a67-b407-ddbdd98e8f6f	7.07585	5.66068	1.41517	0	15.9207	7.18483	5.68753	3.0483	0.787865	0.24882	0	-0.539046	This gene encodes a protein containing an F-box, a motif predicted Concise description: This gene encodes a protein containing an F-box, a motif predicted to mediate protein-protein interactions either with homologs of yeast Skp-1p or with other proteins; this gene's encoded protein also contains an FTH/DUF38 motif,
C07A9.6	WBGene00007402	ugt-60	dc1a6462-25be-4c30-abe3-88182eb4d517	44.6663	18.6109	4.96292	21.0924	62.7981	26.7924	10.4909	25.5148	0.694635	0.473068	0.826673	-0.221568	none available
C07A9.9	WBGene00007405	C07A9.9	eef37356-f5c5-4cfd-988c-e4405e833a63	22.5543	13.8795	6.93977	1.73494	35.1581	24.209	6.93977	4.00932	0.573321	1	0.432727	0.426679	none available
C07A9.9	WBGene00007405	C07A9.9	0feecc3c-5298-4f39-9cc5-d2383408bb09	6.63361	5.68595	0	0.947658	35.1581	24.209	6.93977	4.00932	0.234869	0	0.236364	-0.234869	none available
C07B5.4	WBGene00007409	C07B5.4	7f5c9ad2-37c6-42a0-9fc6-e87d407df207	21.1529	3.67876	11.0363	6.43783	68.9895	27.203	28.7659	13.0206	0.135234	0.383658	0.494433	0.248424	none available
C07E3.9	WBGene00007419	C07E3.9	C07E3.9.1	12.1063	5.50288	2.20115	4.4023	51.0235	13.5885	12.8335	24.6015	0.404966	0.171516	0.178945	-0.23345	none available
C07E3.9	WBGene00007419	C07E3.9	1b8643ca-acf0-4172-80c5-ab0c1c0bcd1d	13.3225	2.80473	5.60947	4.90829	51.0235	13.5885	12.8335	24.6015	0.206405	0.437095	0.199512	0.23069	none available
C07H4.1	WBGene00007421	C07H4.1	d18f4fea-11ff-49e0-8c31-0a7801c00d1a	22.3037	5.81834	8.72752	7.75779	60.3132	9.94975	31.4576	18.9058	0.584773	0.277438	0.410339	-0.307335	none available
C07H4.1	WBGene00007421	C07H4.1	e3691a74-02f0-4982-a5c0-d99d9f60d4b5	7.03162	0	7.03162	0	60.3132	9.94975	31.4576	18.9058	0	0.223527	0	0.223527	none available
C08B6.10	WBGene00007430	C08B6.10	7a4be5d9-e608-484c-9b7d-ddf43d1bef25	11.1071	0.555354	5.55354	4.99818	89.9038	1.26768	56.3959	32.2402	0.438088	0.0984741	0.15503	-0.339614	none available
C08B6.10	WBGene00007430	C08B6.10	abd5edbe-416a-472a-8d06-7e5636ffdcdf	7.12323	0.712323	6.41091	0	89.9038	1.26768	56.3959	32.2402	0.561912	0.113677	0	-0.448235	none available
C08B6.10	WBGene00007430	C08B6.10	907c7a8f-ff85-47ef-9e7a-68f51a245f4c	24.1532	0	16.9072	7.24595	89.9038	1.26768	56.3959	32.2402	0	0.299795	0.224749	0.299795	none available
C08B6.3	WBGene00007424	C08B6.3	08012c25-e09e-40a7-a424-acfdf537f0cb	3.03251	0.758126	1.51625	0.758126	6.25454	2.08485	2.46391	1.70578	0.363636	0.615385	0.444444	0.251748	none available
C08B6.3	WBGene00007424	C08B6.3	5a18d481-084e-4260-abab-4121001ae838	1.32672	1.32672	0	0	6.25454	2.08485	2.46391	1.70578	0.636364	0	0	-0.636364	none available
C08D8.2	WBGene00006582	tmd-2	6fdd2003-9091-4484-b1aa-443e62f4b64b	14.3728	9.14633	2.61324	2.61324	69.6529	26.3169	18.776	24.56	0.347546	0.13918	0.106402	-0.208366	none available
C08D8.7	WBGene00235325	C08D8.7	C08D8.7.2	6.63361	0	6.63361	0	12.6038	1.19405	9.0217	2.3881	0	0.735294	0	0.735294	none available
C08D8.7	WBGene00235325	C08D8.7	640c97e1-c62d-4288-8bbd-9d50f227ae2a	5.97024	1.19405	2.3881	2.3881	12.6038	1.19405	9.0217	2.3881	1	0.264706	1	-0.735294	none available
C08E3.6	WBGene00015598	fbxa-163	9ee76218-69f5-410c-b87b-77fa016752d4	10.6138	0	10.6138	0	16.584	1.32672	15.2573	0	0	0.695652		0.695652	This gene encodes a protein containing an F-box, a motif predicted Concise description: This gene encodes a protein containing an F-box, a motif predicted to mediate protein-protein interactions either with homologs of yeast Skp-1p or with other proteins; this gene's encoded protein also contains an FTH/DUF38 motif,
C08E3.6	WBGene00015598	fbxa-163	6060c0dd-8aa8-4c7a-8ab8-d7a700953a8c	2.65344	1.32672	1.32672	0	16.584	1.32672	15.2573	0	1	0.0869565		-0.913043	This gene encodes a protein containing an F-box, a motif predicted Concise description: This gene encodes a protein containing an F-box, a motif predicted to mediate protein-protein interactions either with homologs of yeast Skp-1p or with other proteins; this gene's encoded protein also contains an FTH/DUF38 motif,
C08E8.4	WBGene00007440	C08E8.4	df1ab59d-297d-46df-a5a1-323f7bcd7593	68.4809	0.713343	64.9142	2.85337	141.959	3.14953	133.266	5.54318	0.226492	0.487101	0.514754	0.260609	none available
C08E8.4	WBGene00007440	C08E8.4	0460af21-90e4-4d8e-8b8f-aa43b64cb65c	60.5206	0.672451	57.1583	2.6898	141.959	3.14953	133.266	5.54318	0.213508	0.428903	0.485246	0.215394	none available
C08E8.4	WBGene00007440	C08E8.4	9dba6018-8f72-4a5c-9c7e-a08f666fdea3	10.5474	0.958857	9.58857	0	141.959	3.14953	133.266	5.54318	0.304445	0.0719504	0	-0.232494	none available
C08F1.5	WBGene00015609	math-4	fbc6eb22-f865-4487-815f-2bb17fbe186c	1.32672	1.32672	0	0	13.0019	4.05361	5.71912	3.22914	0.327294	0	0	-0.327294	none available
C08F1.6	WBGene00015610	C08F1.6	C08F1.6.1	153.624	150.133	2.32764	1.16382	237.073	233.581	2.32764	1.16382	0.642743	1	1	0.357257	none available
C08F1.6	WBGene00015610	C08F1.6	eed83140-73e0-491d-9fca-567a12ff2e43	56.3536	56.3536	0	0	237.073	233.581	2.32764	1.16382	0.241259	0	0	-0.241259	none available
C08F1.8	WBGene00015611	C08F1.8	6ce84677-d4c5-488f-8b70-87cdc7c369f2	0.44224	0.44224	0	0	4.86464	1.91637	2.94827	0	0.230769	0		-0.230769	none available
C08F1.8	WBGene00015611	C08F1.8	bb50bc27-440a-4953-8be6-b70d26ba405a	4.4224	1.47413	2.94827	0	4.86464	1.91637	2.94827	0	0.769231	1		0.230769	none available
C08F8.7	WBGene00004309	rap-3	0847d510-b494-478a-a832-b680d441b34f	10.5032	5.2516	0	5.2516	27.1978	14.7573	5.31945	7.12107	0.355866	0	0.737474	-0.355866	none available
C08F8.7	WBGene00004309	rap-3	a54af368-3214-45eb-a595-6b0c6c27ff34	3.64848	1.82424	1.82424	0	27.1978	14.7573	5.31945	7.12107	0.123617	0.342938	0	0.219322	none available
C08F8.8	WBGene00003657	nhr-67	2c8f6c31-b1f9-4e74-9f99-8810a0fb93b4	5.30688	3.98016	1.32672	0	7.96033	3.98016	3.98016	0	1	0.333333		-0.666667	nhr-67 encodes a nuclear receptor that is orthologous to Drosophila Concise description: nhr-67 encodes a nuclear receptor that is orthologous to Drosophila and vertebrate tailless hormone receptors; during development, nhr-67 plays an essential role in larval development and also functions as part of a complex regulatory network that regulates vulval patterning and differentiation and thus, egg …
C08F8.8	WBGene00003657	nhr-67	6b2c0aa3-d2d7-4d53-b692-9b6551ea8825	2.65344	0	2.65344	0	7.96033	3.98016	3.98016	0	0	0.666667		0.666667	nhr-67 encodes a nuclear receptor that is orthologous to Drosophila Concise description: nhr-67 encodes a nuclear receptor that is orthologous to Drosophila and vertebrate tailless hormone receptors; during development, nhr-67 plays an essential role in larval development and also functions as part of a complex regulatory network that regulates vulval patterning and differentiation and thus, egg …
C08F8.9	WBGene00007449	C08F8.9	722fcdd7-28d9-4024-b851-4470f30e0fe6	65.1641	20.9456	8.14551	36.073	121.019	32.6092	22.9519	65.458	0.642322	0.354895	0.551086	-0.287427	none available
C08F8.9	WBGene00007449	C08F8.9	9210bdf3-6b6e-41f8-b699-a12295eac278	23.9915	4.56982	11.4245	7.99718	121.019	32.6092	22.9519	65.458	0.140139	0.49776	0.122173	0.357622	none available
C08G5.7	WBGene00044418	C08G5.7	31df10ab-0acb-40fe-b88f-8a6a1fde4065	25.2077	7.00214	11.2034	7.00214	70.3162	39.1972	20.2693	10.8496	0.178639	0.552727	0.64538	0.374089	none available
C08G5.7	WBGene00044418	C08G5.7	248991de-96f2-4ccc-9ddf-1c7cdb39f4f9	38.4749	28.2149	6.41248	3.84749	70.3162	39.1972	20.2693	10.8496	0.719819	0.316364	0.35462	-0.403456	none available
C08H9.15	WBGene00007474	C08H9.15	3a9fc3f1-13c8-4e7c-aafc-89a0c4af6b82	22.9965	8.94308	1.27758	12.7758	59.2602	16.9034	13.2181	29.1387	0.52907	0.0966543	0.438449	-0.432415	none available
C08H9.15	WBGene00007474	C08H9.15	0ecf7b20-36d8-4794-b6d7-8a7ef4edfa5e	6.63361	0	3.98016	2.65344	59.2602	16.9034	13.2181	29.1387	0	0.301115	0.0910624	0.301115	none available
C08H9.3	WBGene00007464	C08H9.3	16767793-acce-4926-a6fa-93fbfd71eea4	12.5296	6.2648	0.522067	5.74273	32.5789	18.2873	0.522067	13.7695	0.342577	1	0.417061	0.657423	none available
C09B7.2	WBGene00015621	C09B7.2	47d520d3-30c8-4a84-9eb4-9e03fe724ea2	79.6033	37.7605	22.4522	19.3905	164.081	69.1552	66.5073	28.4182	0.546026	0.33759	0.682328	-0.208436	none available
C09B8.5	WBGene00015624	C09B8.5	5792e3f6-60fa-466e-be9a-288d3028d3e7	17.8112	14.8427	0.989513	1.97903	73.0692	57.5327	0.989513	14.547	0.257987	1	0.136044	0.742013	none available
C09B8.5	WBGene00015624	C09B8.5	58a5423e-59b2-44ee-9111-34ef8183b4a9	50.9793	39.3931	0	11.5862	73.0692	57.5327	0.989513	14.547	0.684708	0	0.796467	-0.684708	none available
C09B9.8	WBGene00044484	hot-9	10580763-a489-419f-be86-b3a320205175	11.9405	5.30688	5.30688	1.32672	22.5543	7.79449	12.1892	2.57052	0.680851	0.435374	0.516129	-0.245477	none available
C09E7.4	WBGene00015638	C09E7.4	C09E7.4.2	26.5344	25.4514	0	1.08304	147.605	127.199	3.2671	17.1388	0.200091	0	0.0631921	-0.200091	none available
C09E7.4	WBGene00015638	C09E7.4	369a27b8-a1ef-450d-b241-2fd93fe16147	15.4342	12.0044	1.14327	2.28655	147.605	127.199	3.2671	17.1388	0.0943746	0.349935	0.133413	0.255561	none available
C09E7.8	WBGene00015642	C09E7.8	C09E7.8b.2	1.32672	0	1.32672	0	34.2736	5.75631	5.5401	22.9772	0	0.239476	0	0.239476	none available
C09E7.8	WBGene00015642	C09E7.8	663d2276-1403-4ed7-8e83-f167c261c0a0	15.4784	3.43965	1.71982	10.3189	34.2736	5.75631	5.5401	22.9772	0.597544	0.310432	0.449094	-0.287112	none available
C09F12.1	WBGene00000522	clc-1	C09F12.1.2	31.1779	4.74447	6.10003	20.3334	96.8506	11.2048	31.3416	54.3042	0.423432	0.194631	0.374436	-0.228801	clc-1 encodes a claudin homolog, closely similar to CLC-2, Concise description: clc-1 encodes a claudin homolog, closely similar to CLC-2, that is required for normal cohesion of apical junctions in epithelia; claudins are integral membrane proteins with four transmembrane sequences that are found in mammalian tight junctions (TJs), induce TJs when transgenically expressed in cells normally lacki…
C09F5.2	WBGene00015648	orai-1	ec35dff8-5997-4809-9f43-da649e930659	34.6803	15.8539	4.95433	13.8721	209.622	59.5649	90.5326	59.5244	0.266161	0.0547243	0.233049	-0.211437	orai-1 encodes a calcium release activated calcium (CRAC) channel Concise description: orai-1 encodes a calcium release activated calcium (CRAC) channel orthologous to the vertebrate ORAI family of proteins; ORAI-1 activity is required for normal levels of fertility and for store-operated calcium channel (SOCC) activity in intestinal epithelial cells; co-expression of ORAI-1 and STIM-1 in HEK293 …
C09F5.2	WBGene00015648	orai-1	84d3aba8-6e2f-4080-b558-c6e1a16372c2	46.168	5.05951	29.0922	12.0163	209.622	59.5649	90.5326	59.5244	0.0849411	0.321345	0.201873	0.236404	orai-1 encodes a calcium release activated calcium (CRAC) channel Concise description: orai-1 encodes a calcium release activated calcium (CRAC) channel orthologous to the vertebrate ORAI family of proteins; ORAI-1 activity is required for normal levels of fertility and for store-operated calcium channel (SOCC) activity in intestinal epithelial cells; co-expression of ORAI-1 and STIM-1 in HEK293 …
C09G1.4	WBGene00007486	C09G1.4	C09G1.4.1	4.146	1.18457	2.96143	0	25.263	14.9247	9.30174	1.0365	0.0793697	0.318374	0	0.239004	none available
C09G1.4	WBGene00007486	C09G1.4	b0653ca3-101c-46cd-b057-02484df27fd4	10.5585	8.21216	2.34633	0	25.263	14.9247	9.30174	1.0365	0.550238	0.252246	0	-0.297992	none available
C09G1.5	WBGene00007487	C09G1.5	1a151b72-a41b-4d83-aa83-461992fc596c	3.98016	1.32672	2.65344	0	27.8611	13.4883	7.62865	5.41744	0.0983607	0.347826	0	0.249465	none available
C09H10.10	WBGene00007504	C09H10.10	7cda88d7-3bd4-4dd3-8fc8-d47cddb5a96e	28.2923	5.65847	3.39508	19.2388	55.5564	11.1948	13.8667	30.4949	0.505454	0.244837	0.630885	-0.260617	none available
C09H10.7	WBGene00007501	apc-17	c1eb78e7-84dd-4ba2-8d91-269e49bd2909	40.7967	17.3077	1.23626	22.2527	53.0688	19.6565	2.03475	31.3776	0.880508	0.607574	0.709191	-0.272934	none available
C09H10.7	WBGene00007501	apc-17	285eda0a-d8af-457e-a42a-2273dd8d3a1f	7.18641	1.59698	0.798489	4.79094	53.0688	19.6565	2.03475	31.3776	0.0812445	0.392426	0.152686	0.311181	none available
C10A4.8	WBGene00003380	mnm-2	cad86a12-fb2a-47ed-8564-ed31cd4df1cd	0.663361	0	0.663361	0	10.6138	5.30688	2.98512	2.32176	0	0.222222	0	0.222222	none available
C10C5.2	WBGene00007506	C10C5.2	07d22619-6e2b-4a6b-9de3-e7b586a97850	16.6946	0	14.3096	2.38494	23.881	1.23459	20.2615	2.38494	0	0.706249	1	0.706249	none available
C10C5.2	WBGene00007506	C10C5.2	a0b61ef9-a2f2-4ccf-86c0-3fcc15b4b22e	1.21616	0.405387	0.810774	0	23.881	1.23459	20.2615	2.38494	0.328358	0.0400156	0	-0.288343	none available
C10C5.2	WBGene00007506	C10C5.2	C10C5.2.1	0.44224	0.44224	0	0	23.881	1.23459	20.2615	2.38494	0.358209	0	0	-0.358209	none available
C10C5.2	WBGene00007506	C10C5.2	c773485f-751c-4d2b-a62d-7560a77e28ce	4.75408	0	4.75408	0	23.881	1.23459	20.2615	2.38494	0	0.234637	0	0.234637	none available
C10C5.2	WBGene00007506	C10C5.2	71fbbb31-1176-4058-b74d-7cd755d734d9	0.773921	0.38696	0.38696	0	23.881	1.23459	20.2615	2.38494	0.313433	0.0190984	0	-0.294334	none available
C10C5.3	WBGene00007507	C10C5.3	34736c3c-5647-44be-b5e9-47fc053a4c23	66.3487	7.01246	0.53942	58.7968	240.866	34.9243	1.20815	204.734	0.20079	0.446483	0.287187	0.245693	none available
C10C5.4	WBGene00007508	C10C5.4	c0b6325b-1c9c-435e-9748-26879f8696c9	4.86464	1.21616	0	3.64848	52.2396	5.32919	2.65344	44.257	0.228207	0	0.0824385	-0.228207	C10C5.4 encodes an aminoacylase with similarity to the vertebrate Concise description: C10C5.4 encodes an aminoacylase with similarity to the vertebrate aminoacylase-I; by homology, the product of C10C5.4 is predicted to hydrolyze N-acetyl
C10C5.4	WBGene00007508	C10C5.4	f35e9a16-de67-4712-b86f-6ea71069bd82	6.19136	1.1257	0	5.06566	52.2396	5.32919	2.65344	44.257	0.211233	0	0.11446	-0.211233	C10C5.4 encodes an aminoacylase with similarity to the vertebrate Concise description: C10C5.4 encodes an aminoacylase with similarity to the vertebrate aminoacylase-I; by homology, the product of C10C5.4 is predicted to hydrolyze N-acetyl
C10C5.4	WBGene00007508	C10C5.4	C10C5.4.1	5.30688	1.32672	1.32672	2.65344	52.2396	5.32919	2.65344	44.257	0.248953	0.5	0.0599553	0.251047	C10C5.4 encodes an aminoacylase with similarity to the vertebrate Concise description: C10C5.4 encodes an aminoacylase with similarity to the vertebrate aminoacylase-I; by homology, the product of C10C5.4 is predicted to hydrolyze N-acetyl
C10C5.4	WBGene00007508	C10C5.4	ca5dd0ee-bc94-4052-b310-5ddb4a7e2208	2.65344	0	1.32672	1.32672	52.2396	5.32919	2.65344	44.257	0	0.5	0.0299777	0.5	C10C5.4 encodes an aminoacylase with similarity to the vertebrate Concise description: C10C5.4 encodes an aminoacylase with similarity to the vertebrate aminoacylase-I; by homology, the product of C10C5.4 is predicted to hydrolyze N-acetyl
C10E2.2	WBGene00015673	C10E2.2	c3e66c06-51f2-417b-a24d-971a31fea797	3.98016	2.65344	0	1.32672	9.95041	5.97024	2.65344	1.32672	0.444444	0	1	-0.444444	This gene encodes a protein containing an F-box, a motif predicted Concise description: This gene encodes a protein containing an F-box, a motif predicted to mediate protein-protein interactions either with homologs of yeast Skp-1p or
C10E2.2	WBGene00015673	C10E2.2	080eea25-4bdf-4ccd-9845-456127938599	2.65344	1.32672	1.32672	0	9.95041	5.97024	2.65344	1.32672	0.222222	0.5	0	0.277778	This gene encodes a protein containing an F-box, a motif predicted Concise description: This gene encodes a protein containing an F-box, a motif predicted to mediate protein-protein interactions either with homologs of yeast Skp-1p or
C10F3.1	WBGene00015677	cpg-4	C10F3.1.1	33.168	3.98016	3.98016	25.2077	99.4267	22.8976	8.85198	67.6771	0.173824	0.449636	0.37247	0.275811	cpg-4 encodes a large (782-residue), unfamiliar, putatively Concise description: cpg-4 encodes a large (782-residue), unfamiliar, putatively secreted protein with a C-terminal low-complexity domain; CPG-4 has 35 potential chondroitin attachment sites, mostly in its C-terminal half, 4 of which have been
C10F3.2	WBGene00000979	dhs-16	c3037217-7bd5-4601-87b8-0a04c182d186	2.87456	2.29965	0.574912	0	10.3926	9.81774	0.574912	0	0.234234	1		0.765766	dhs-16 encodes a short-chain dehydrogenase predicted to be Concise description: dhs-16 encodes a short-chain dehydrogenase predicted to be
C10F3.2	WBGene00000979	dhs-16	6c5e7271-e766-4b18-b8c8-5dd4e78695b8	4.86464	4.86464	0	0	10.3926	9.81774	0.574912	0	0.495495	0		-0.495495	dhs-16 encodes a short-chain dehydrogenase predicted to be Concise description: dhs-16 encodes a short-chain dehydrogenase predicted to be
C10F3.2	WBGene00000979	dhs-16	C10F3.2.1	2.65344	2.65344	0	0	10.3926	9.81774	0.574912	0	0.27027	0		-0.27027	dhs-16 encodes a short-chain dehydrogenase predicted to be Concise description: dhs-16 encodes a short-chain dehydrogenase predicted to be
C10G11.5	WBGene00004068	pnk-1	00ea4ea1-3ee2-4274-8d6f-c3ae805fea9b	224.067	64.2816	82.6478	77.138	466.823	109.448	225.13	132.244	0.587324	0.367111	0.5833	-0.220213	none available
C10G11.9	WBGene00015689	spch-2	1320386b-0815-4f3f-b2e3-b94368e70522	4.17917	0.597024	0.597024	2.98512	172.208	1.15204	18.8354	152.221	0.518234	0.0316969	0.0196105	-0.486537	spch-2 encodes one of three C. elegans small, highly basic Concise description: spch-2 encodes one of three C. elegans small, highly basic proteins that have similarity to mouse testis-specific histone H1, the human nucleotide-binding and splicing-associated protein SON, and the mollusk protamine-like SNBPs (sperm nuclear basic proteins); SPCH-2 associates specifically with spermatogenic meiotic
C10G11.9	WBGene00015689	spch-2	b2870759-46db-4ac3-804e-247e1ae74d2f	158.786	0	16.7823	142.004	172.208	1.15204	18.8354	152.221	0	0.890998	0.932881	0.890998	spch-2 encodes one of three C. elegans small, highly basic Concise description: spch-2 encodes one of three C. elegans small, highly basic proteins that have similarity to mouse testis-specific histone H1, the human nucleotide-binding and splicing-associated protein SON, and the mollusk protamine-like SNBPs (sperm nuclear basic proteins); SPCH-2 associates specifically with spermatogenic meiotic
C10G11.9	WBGene00015689	spch-2	78d149e6-d4bf-4324-9f8b-cf3be627a73d	5.55012	0.555012	0.555012	4.44009	172.208	1.15204	18.8354	152.221	0.481766	0.0294664	0.0291687	-0.452299	spch-2 encodes one of three C. elegans small, highly basic Concise description: spch-2 encodes one of three C. elegans small, highly basic proteins that have similarity to mouse testis-specific histone H1, the human nucleotide-binding and splicing-associated protein SON, and the mollusk protamine-like SNBPs (sperm nuclear basic proteins); SPCH-2 associates specifically with spermatogenic meiotic
C10G8.7	WBGene00000454	ceh-33	a7bac409-984b-4138-8a07-533b11a99507	4.75408	2.37704	2.37704	0	10.9454	3.39972	6.85473	0.691001	0.699187	0.346774	0	-0.352413	ceh-33 encodes a Six/sine oculis class homeodomain transcription Concise description: ceh-33 encodes a Six/sine oculis class homeodomain transcription factor; preliminary RNAi experiments suggest that CEH-33 activity may be required for gonad development; a ceh-33::gfp reporter shows very weak pharyngeal expression
C10G8.7	WBGene00000454	ceh-33	62c9ea17-15fe-4758-b4bd-23f70e576208	3.09568	0	3.09568	0	10.9454	3.39972	6.85473	0.691001	0	0.451613	0	0.451613	ceh-33 encodes a Six/sine oculis class homeodomain transcription Concise description: ceh-33 encodes a Six/sine oculis class homeodomain transcription factor; preliminary RNAi experiments suggest that CEH-33 activity may be required for gonad development; a ceh-33::gfp reporter shows very weak pharyngeal expression
C10H11.10	WBGene00015698	kca-1	bdbf8cd5-7749-493b-a980-b2dc9a754d7d	26.4902	0	3.69631	22.7939	117.459	1.38505	12.342	103.732	0	0.29949	0.219738	0.29949	none available
C10H11.10	WBGene00015698	kca-1	C10H11.10.1	80.333	1.38505	6.92525	72.0227	117.459	1.38505	12.342	103.732	1	0.561113	0.694315	-0.438887	none available
C10H11.8	WBGene00015697	mlst-8	ae494ffa-1c49-40a1-9f70-6618623df2cc	13.2009	4.1687	1.38957	7.64261	15.987	5.3738	2.97057	7.64261	0.775744	0.467777	1	-0.307968	mlst-8 encodes a WD40 repeat-containing protein that is the Concise description: mlst-8 encodes a WD40 repeat-containing protein that is the C. elegans ortholog of Saccharomyces cerevisiae and mammalian Lst8; by homology, MLST-8 is predicted to function as a member of the TOR complexes to regulate growth, development, and actin cytoskeleton organization; loss of mlst-8 activity via RNAi results i…
C10H11.8	WBGene00015697	mlst-8	00499522-edca-47f7-9db6-94f86788694c	1.92375	0.641248	1.2825	0	15.987	5.3738	2.97057	7.64261	0.119329	0.431734	0	0.312405	mlst-8 encodes a WD40 repeat-containing protein that is the Concise description: mlst-8 encodes a WD40 repeat-containing protein that is the C. elegans ortholog of Saccharomyces cerevisiae and mammalian Lst8; by homology, MLST-8 is predicted to function as a member of the TOR complexes to regulate growth, development, and actin cytoskeleton organization; loss of mlst-8 activity via RNAi results i…
C11D2.6	WBGene00006809	unc-77	6b3b0da0-8294-4d2b-85de-e38f432829ed	1.6584	0	1.6584	0	6.6336	2.65344	3.98016	0	0	0.416667		0.416667	unc-77 encodes, along with nca-2, one of two C. elegans alpha-1-like Concise description: unc-77 encodes, along with nca-2, one of two C. elegans alpha-1-like subunits of a voltage-insensitive cation leak channel related to Drosophila narrow abdomen and the vertebrate Vgcnl1/NALCN proteins; unc-77 functions redundantly with nca-2 to transmit depolarization signals from neuronal cell bodies to axo…
C11D2.6	WBGene00006809	unc-77	04ea90d3-7661-47ff-af2d-339444b148f6	1.6584	0	1.6584	0	6.6336	2.65344	3.98016	0	0	0.416667		0.416667	unc-77 encodes, along with nca-2, one of two C. elegans alpha-1-like Concise description: unc-77 encodes, along with nca-2, one of two C. elegans alpha-1-like subunits of a voltage-insensitive cation leak channel related to Drosophila narrow abdomen and the vertebrate Vgcnl1/NALCN proteins; unc-77 functions redundantly with nca-2 to transmit depolarization signals from neuronal cell bodies to axo…
C11D2.6	WBGene00006809	unc-77	4d55ec11-2a2d-46ec-9ea5-6b2ac9b1fada	1.76896	1.76896	0	0	6.6336	2.65344	3.98016	0	0.666667	0		-0.666667	unc-77 encodes, along with nca-2, one of two C. elegans alpha-1-like Concise description: unc-77 encodes, along with nca-2, one of two C. elegans alpha-1-like subunits of a voltage-insensitive cation leak channel related to Drosophila narrow abdomen and the vertebrate Vgcnl1/NALCN proteins; unc-77 functions redundantly with nca-2 to transmit depolarization signals from neuronal cell bodies to axo…
C11E4.1	WBGene00007516	gpx-5	C11E4.1.1	192.7	8.14226	92.279	92.279	296.47	26.5345	156.075	113.861	0.306856	0.591249	0.810453	0.284394	gpx-5 encodes a glutathione peroxidase; by homology, GPX-5 Concise description: gpx-5 encodes a glutathione peroxidase; by homology, GPX-5 is predicted to function to reduce lipid hydroperoxides to their corresponding alcohols and reduce hydrogen peroxide to water to protect cells from damage induced by reactive
C11G10.1	WBGene00007525	C11G10.1	f69daf5d-9955-4cbb-aaf7-c1db5f235ecd	51.7421	1.32672	41.1284	9.28705	62.3559	1.32672	51.7421	9.28705	1	0.794872	1	-0.205128	none available
C11G6.4	WBGene00003624	nhr-28	5d58af00-1883-4671-b624-14b2398a91eb	1.32672	1.32672	0	0	5.30688	3.98016	1.32672	0	0.333333	0		-0.333333	none available
C11G6.4	WBGene00003624	nhr-28	2130ef9e-c23f-465e-a5da-5fb7bd2ee75f	1.32672	1.32672	0	0	5.30688	3.98016	1.32672	0	0.333333	0		-0.333333	none available
C11G6.4	WBGene00003624	nhr-28	e7f1f88a-9395-42d7-b018-bcb032c4b6b7	2.65344	1.32672	1.32672	0	5.30688	3.98016	1.32672	0	0.333333	1		0.666667	none available
C11H1.7	WBGene00007531	C11H1.7	4b9988c2-7ab8-43d6-92c2-1272cafe4204	13.0461	10.8717	2.17435	0	41.1284	28.0541	11.9687	0	0.387528	0.18167		-0.205858	none available
C12C8.2	WBGene00007533	cbl-1	c6be6506-9ecc-410f-af8b-403ce75f9721	17.5569	3.09828	7.22933	7.22933	100.831	13.4216	13.1421	74.2671	0.230844	0.550089	0.0973422	0.319246	cbl-1 encodes a putative cystathionine gamma-lyase orthologous Concise description: cbl-1 encodes a putative cystathionine gamma-lyase orthologous to human CTH (OMIM:607657, mutated in cystathioninuria), and paralogous to CTH-1
C12D5.2	WBGene00015705	nhr-152	f5e2ac0d-f7a5-4230-8ac8-f7d4d944c7f5	5.30688	3.98016	1.32672	0	34.4947	25.0161	2.45443	7.02425	0.159104	0.540541	0	0.381436	none available
C12D5.2	WBGene00015705	nhr-152	e94fa49b-11a8-4cd8-8575-66e844fb0af4	11.056	7.37067	0	3.68534	34.4947	25.0161	2.45443	7.02425	0.294638	0	0.524659	-0.294638	none available
C12D5.7	WBGene00015709	cyp-33A1	C12D5.7.1	35.8215	11.9405	5.30688	18.5741	39.8016	11.9405	9.28705	18.5741	1	0.571429	1	-0.428571	none available
C12D5.7	WBGene00015709	cyp-33A1	01990ada-643c-4e75-806f-12a9482493fc	2.65344	0	2.65344	0	39.8016	11.9405	9.28705	18.5741	0	0.285714	0	0.285714	none available
C12D8.17	WBGene00007544	fipr-6	f744e7fa-2f5f-4a38-8a6d-a4e8bacf975c	11.9405	0	2.3881	9.55239	45.993	5.10031	8.83841	32.0543	0	0.270196	0.298007	0.270196	none available
C12D8.5	WBGene00007536	daf-36	313b889b-f8ed-4e58-ae12-3b56f096070b	35.4582	1.26636	5.06546	29.1264	77.3131	1.26636	10.477	65.5697	1	0.483482	0.444205	-0.516518	daf-36 encodes a protein homologous to the catalytic subunit Concise description: daf-36 encodes a protein homologous to the catalytic subunit of Rieske-like oxygenases; DAF-36 functions in a hormone biosynthetic pathway producing a ligand for the DAF-12 nuclear receptor that regulates the developmental decision between reproductive growth and dauer formation; a daf-36::gfp reporter fusion is exp…
C12D8.5	WBGene00007536	daf-36	C12D8.5.1	36.4848	0	4.37818	32.1066	77.3131	1.26636	10.477	65.5697	0	0.417883	0.489657	0.417883	daf-36 encodes a protein homologous to the catalytic subunit Concise description: daf-36 encodes a protein homologous to the catalytic subunit of Rieske-like oxygenases; DAF-36 functions in a hormone biosynthetic pathway producing a ligand for the DAF-12 nuclear receptor that regulates the developmental decision between reproductive growth and dauer formation; a daf-36::gfp reporter fusion is exp…
C13A10.2	WBGene00015729	C13A10.2	C13A10.2.1	19.2375	0	17.8125	1.425	86.2369	1.06138	78.8416	5.6705	0	0.225927	0.2513	0.225927	none available
C13A10.2	WBGene00015729	C13A10.2	a6137108-de61-415e-ac8a-b6677cf13b43	63.6826	1.06138	58.3757	4.24551	86.2369	1.06138	78.8416	5.6705	1	0.740418	0.7487	-0.259582	none available
C13A2.3	WBGene00015720	C13A2.3	c34d5708-d9af-4347-8049-1a432901e7e5	3.3168	1.1056	2.2112	0	5.30688	2.43232	2.87456	0	0.454545	0.769231		0.314685	none available
C13A2.3	WBGene00015720	C13A2.3	1d73bcd2-3496-4245-b3bd-a1b7c11871f1	0.663361	0	0.663361	0	5.30688	2.43232	2.87456	0	0	0.230769		0.230769	none available
C13A2.3	WBGene00015720	C13A2.3	24eab795-0736-428f-9c3b-4785e1fa593f	1.32672	1.32672	0	0	5.30688	2.43232	2.87456	0	0.545455	0		-0.545455	none available
C13B9.1	WBGene00015732	C13B9.1	60591c43-097f-4241-ae02-31772e8361c8	1.32672	1.32672	0	0	6.63361	3.98016	1.32672	1.32672	0.333333	0	0	-0.333333	none available
C13B9.1	WBGene00015732	C13B9.1	2fcb0669-e57e-4f07-80bf-ce870db2679d	5.30688	2.65344	1.32672	1.32672	6.63361	3.98016	1.32672	1.32672	0.666667	1	1	0.333333	none available
C13B9.2	WBGene00015733	C13B9.2	2497e6c6-faa4-4906-aa83-43eb917f1c07	5.30688	0.663361	1.99008	2.65344	7.96033	0.663361	3.3168	3.98016	1	0.6	0.666667	-0.4	none available
C13B9.2	WBGene00015733	C13B9.2	8877fe33-0f75-4f3e-9966-d5746de4cfbd	1.32672	0	1.32672	0	7.96033	0.663361	3.3168	3.98016	0	0.4	0	0.4	none available
C13C12.2	WBGene00007552	C13C12.2	50575ead-3523-4349-95ea-c11ed8c83937	6.85473	5.87548	0.979246	0	26.5344	25.5552	0.979246	0	0.229913	1		0.770087	none available
C13C4.1	WBGene00007546	nhr-153	e3951561-5b58-4364-9dac-258e4ba614d5	2.65344	0	1.32672	1.32672	11.2771	3.98016	3.3168	3.98016	0	0.4	0.333333	0.4	none available
C13C4.1	WBGene00007546	nhr-153	8ac77cc2-0be5-4e0a-9021-3f6576036a9f	2.65344	1.32672	0	1.32672	11.2771	3.98016	3.3168	3.98016	0.333333	0	0.333333	-0.333333	none available
C13C4.3	WBGene00003726	nhr-136	53639acc-3deb-4425-aae0-1be46c5c7a3d	5.97024	2.3881	0	3.58215	21.5592	6.66203	7.38015	7.51703	0.358464	0	0.476537	-0.358464	none available
C13C4.7	WBGene00007551	C13C4.7	8bcd9424-c754-4d57-a392-e2fd7ec1eefe	8.62369	1.23196	4.92782	2.46391	13.2672	2.55868	6.9179	3.79063	0.481481	0.712329	0.65	0.230847	none available
C13C4.7	WBGene00007551	C13C4.7	8142a365-0114-4190-a68a-76c6304d2452	1.32672	1.32672	0	0	13.2672	2.55868	6.9179	3.79063	0.518519	0	0	-0.518519	none available
C13F10.1	WBGene00015741	C13F10.1	dd64ea6e-0851-4048-ba1e-1a57d38125f9	37.3693	19.9303	13.7021	3.73693	45.1085	27.172	14.1996	3.73693	0.733487	0.964962	1	0.231475	none available
C13G5.2	WBGene00015747	C13G5.2	11a9907c-b376-464f-b559-f7405c997be7	17.2158	6.45592	5.73859	5.02127	89.143	40.5845	10.3895	38.169	0.159074	0.552347	0.131553	0.393274	none available
C14A11.12	WBGene00219650	linc-56	C14A11.12	0.33168	0	0.33168	0	2.32176	0.829201	1.49256	0	0	0.222222		0.222222	none available
C14A11.12	WBGene00219650	linc-56	74f2f279-96e2-4b13-804b-eb6214f8ca31	1.6584	0.829201	0.829201	0	2.32176	0.829201	1.49256	0	1	0.555556		-0.444444	none available
C14A11.12	WBGene00219650	linc-56	56da6f89-5298-4b54-a1be-5c3201223b44	0.33168	0	0.33168	0	2.32176	0.829201	1.49256	0	0	0.222222		0.222222	none available
C14A11.2	WBGene00015748	C14A11.2	c1fdc6a0-9048-4692-81bf-0eb65396d088	1.32672	0	1.32672	0	13.7095	8.90009	4.80936	0	0	0.275862		0.275862	none available
C14A11.2	WBGene00015748	C14A11.2	5553b6e1-b5a6-49b7-8b04-38908c9c13c2	8.18145	6.13608	2.04536	0	13.7095	8.90009	4.80936	0	0.689441	0.425287		-0.264154	none available
C14A11.7	WBGene00006055	ssr-2	a5330217-147b-4343-adb6-65c4dac0b051	1.32672	1.32672	0	0	22.5543	5.36216	14.1517	3.0404	0.247423	0	0	-0.247423	none available
C14B1.3	WBGene00007574	C14B1.3	a3dc2df6-68e9-4eef-af1a-14c80206834b	42.3925	14.4755	19.6453	8.2717	79.7038	28.9781	26.6721	24.0536	0.499532	0.736549	0.343886	0.237018	This gene encodes a protein containing an F-box, a motif predicted Concise description: This gene encodes a protein containing an F-box, a motif predicted to mediate protein-protein interactions either with homologs of yeast Skp-1p or
C14B1.7	WBGene00007578	C14B1.7	5196bee1-de84-448d-9b7c-5b12e45897a2	10.7612	1.19569	1.19569	8.36981	45.0717	4.14537	2.31121	38.6151	0.288439	0.517342	0.21675	0.228904	none available
C14B9.3	WBGene00015753	C14B9.3	eb7d0b31-3d01-4d38-9c83-adaa6a9af50c	44.1135	31.8597	11.0284	1.22537	53.0688	39.9306	11.0284	2.10985	0.797877	1	0.580786	0.202123	none available
C14C11.4	WBGene00015768	C14C11.4	8e9dced4-b0e7-4cc6-90ae-24919b97cc95	3.09568	0	1.85741	1.23827	15.9207	1.73737	6.03763	8.14565	0	0.307639	0.152017	0.307639	none available
C14C11.4	WBGene00015768	C14C11.4	299e5757-2d05-4b29-82b0-7692133e376c	6.63361	1.1056	1.1056	4.4224	15.9207	1.73737	6.03763	8.14565	0.636364	0.183118	0.542916	-0.453245	none available
C14C6.2	WBGene00015756	C14C6.2	22ae7e8b-cde8-41a0-ad47-5974417765d7	121.363	1.20162	62.4841	57.6776	138.863	1.20162	78.6608	59.001	1	0.794349	0.97757	-0.205651	none available
C14F5.2	WBGene00006980	zig-3	df89f1fc-0c2b-4826-9dee-fc36b3715f13	72.3063	8.79401	61.5581	1.95422	89.5537	8.79401	78.8054	1.95422	1	0.78114	1	-0.21886	zig-3 encodes a predicted secreted protein that is a member Concise description: zig-3 encodes a predicted secreted protein that is a member of the immunoglobulin superfamily of proteins; a zig-3::gfp reporter fusion is expressed in the PVT, AIM, and ASI neurons, as well as in the vulva and weakly in the body
C14F5.4	WBGene00015777	sfxn-2	50b61931-4868-497a-b7fe-29a4a61b8c16	31.3011	14.3091	3.57727	13.4148	52.2823	22.6703	12.5258	17.0862	0.631181	0.285592	0.785125	-0.345589	none available
C14F5.4	WBGene00015777	sfxn-2	C14F5.4.1	9.28705	5.97024	0.663361	2.65344	52.2823	22.6703	12.5258	17.0862	0.263351	0.0529596	0.155298	-0.210391	none available
C14F5.4	WBGene00015777	sfxn-2	74e92e2b-fd55-4ddc-92ac-b89d694b995d	3.75904	0	3.75904	0	52.2823	22.6703	12.5258	17.0862	0	0.300104	0	0.300104	none available
C15A11.4	WBGene00007598	C15A11.4	5f6f7eff-c37c-4d9c-964b-a94a69e2c123	6.41248	4.27499	1.06875	1.06875	14.1517	10.9086	1.06875	2.17435	0.391892	1	0.491525	0.608108	none available
C15A11.4	WBGene00007598	C15A11.4	49919ed2-3965-4216-a5d3-24307d11eebe	7.73921	6.63361	0	1.1056	14.1517	10.9086	1.06875	2.17435	0.608108	0	0.508475	-0.608108	none available
C15A11.7	WBGene00007599	C15A11.7	5a201796-401e-4f0e-81e3-caddd83e6c66	5.14176	0.21424	4.2848	0.642721	229.421	0.414943	163.103	65.9033	0.516313	0.0262705	0.00975248	-0.490042	none available
C15A11.7	WBGene00007599	C15A11.7	484b8d2f-a6d7-4518-963d-a37c51c734cc	4.01405	0.200703	3.01054	0.80281	229.421	0.414943	163.103	65.9033	0.483687	0.0184579	0.0121816	-0.465229	none available
C15A7.1	WBGene00007594	lgc-23	C15A7.1.1	5.30688	3.98016	1.32672	0	10.6138	6.85473	3.75904	0	0.580645	0.352941		-0.227704	none available
C15A7.1	WBGene00007594	lgc-23	6ca39865-d4f2-4a82-bcb1-c4dd902c61e1	1.32672	0	1.32672	0	10.6138	6.85473	3.75904	0	0	0.352941		0.352941	none available
C15B12.1	WBGene00015783	C15B12.1	afac4636-d1ba-424c-a36d-faab40ef1ccc	19.6797	4.37327	6.5599	8.74653	32.7258	11.1395	9.6998	11.8864	0.392589	0.676292	0.735841	0.283702	none available
C15B12.1	WBGene00015783	C15B12.1	cf04fab2-ead1-49fa-8d35-47a5c2f4b2f6	3.3168	3.3168	0	0	32.7258	11.1395	9.6998	11.8864	0.29775	0	0	-0.29775	none available
C15B12.4	WBGene00015786	C15B12.4	C15B12.4.2	0.44224	0.44224	0	0	16.584	1.61418	14.9698	0	0.273973	0		-0.273973	none available
C15B12.4	WBGene00015786	C15B12.4	C15B12.4.1	1.1056	0.5528	0.5528	0	16.584	1.61418	14.9698	0	0.342466	0.0369276		-0.305538	none available
C15B12.4	WBGene00015786	C15B12.4	fbf89323-5a3f-4848-b852-f8651f1d1433	3.09568	0.619136	2.47655	0	16.584	1.61418	14.9698	0	0.383562	0.165436		-0.218126	none available
C15B12.4	WBGene00015786	C15B12.4	3044aaf0-5df5-4374-9029-974b83e5098f	4.64352	0	4.64352	0	16.584	1.61418	14.9698	0	0	0.310192		0.310192	none available
C15B12.4	WBGene00015786	C15B12.4	52c08b68-04ee-4765-9c76-352c27dddd7a	3.53792	0	3.53792	0	16.584	1.61418	14.9698	0	0	0.236337		0.236337	none available
C15B12.4	WBGene00015786	C15B12.4	b9f3f014-d8e4-47c2-81dc-6b70aab8b1b8	3.53792	0	3.53792	0	16.584	1.61418	14.9698	0	0	0.236337		0.236337	none available
C15B12.5	WBGene00001517	gar-1	e834a957-cb78-4b7f-8f02-3d97bd17c647	1.32672	0	1.32672	0	5.30688	1.32672	3.98016	0	0	0.333333		0.333333	gar-1 encodes a G protein-linked muscarinic acetylcholine receptor; Concise description: gar-1 encodes a G protein-linked muscarinic acetylcholine receptor; though gar-1 is most closely related to muscarinic acetylcholine receptors (mAChR), it is pharmacologically distinct from them in its response to certain ligands; gar-1 gene transcripts are expressed at all developmental stages; the GAR-1-GFP…
C15B12.5	WBGene00001517	gar-1	380866cd-00d6-454b-8be5-0c6ff61f4687	3.98016	1.32672	2.65344	0	5.30688	1.32672	3.98016	0	1	0.666667		-0.333333	gar-1 encodes a G protein-linked muscarinic acetylcholine receptor; Concise description: gar-1 encodes a G protein-linked muscarinic acetylcholine receptor; though gar-1 is most closely related to muscarinic acetylcholine receptors (mAChR), it is pharmacologically distinct from them in its response to certain ligands; gar-1 gene transcripts are expressed at all developmental stages; the GAR-1-GFP…
C15B12.6	WBGene00015787	actl-1	61d22559-efb7-4437-b268-c29dca3a6a82	2.80086	0.700214	1.40043	0.700214	32.3573	15.918	5.24371	11.1955	0.0439888	0.267068	0.0625441	0.22308	none available
C15C6.1	WBGene00007600	C15C6.1	8296b6a7-4a63-4455-a62c-93d074f87394	25.0971	24.0514	0	1.04571	49.752	44.4131	4.29326	1.04571	0.541539	0	1	-0.541539	none available
C15C6.1	WBGene00007600	C15C6.1	03726a4b-185a-4f21-9fcb-fe85350280e8	16.0312	12.2592	3.77205	0	49.752	44.4131	4.29326	1.04571	0.276026	0.878598	0	0.602572	none available
C15C7.4	WBGene00015790	C15C7.4	2ce86573-eb9e-4226-9d12-b71c0b689882	61.9807	0.968448	55.2016	5.81069	184.414	10.8148	164.349	9.25072	0.0895483	0.335881	0.628134	0.246333	none available
C15C7.4	WBGene00015790	C15C7.4	05219e91-644b-42d2-acb0-5d4b6f3ea577	91.1686	7.78268	82.2741	1.11181	184.414	10.8148	164.349	9.25072	0.719631	0.500607	0.120186	-0.219024	none available
C15C8.5	WBGene00007607	C15C8.5	897b1213-c937-4b12-a9f0-cff4ebc259c6	3.75904	1.87952	1.87952	0	5.30688	3.42736	1.87952	0	0.548387	1		0.451613	none available
C15C8.5	WBGene00007607	C15C8.5	eda2da6f-4238-4b63-981c-e92e5cb6a28e	1.1056	1.1056	0	0	5.30688	3.42736	1.87952	0	0.322581	0		-0.322581	none available
C15F1.5	WBGene00015796	C15F1.5	e707fac6-a471-4b39-b275-312eadad5ede	3.09568	0	2.06379	1.03189	18.5741	3.40525	4.65089	10.5179	0	0.44374	0.0981079	0.44374	none available
C15F1.5	WBGene00015796	C15F1.5	1bffe9b2-b1f5-4446-bdea-8d45d15d4ef9	12.6038	2.52077	1.26038	8.82269	18.5741	3.40525	4.65089	10.5179	0.74026	0.270998	0.838823	-0.469261	none available
C15H11.11	WBGene00007619	C15H11.11	ccff9f5e-7817-4a8f-a8b9-672558ac2b88	4.31184	0	1.61694	2.6949	10.2821	1.71368	2.31716	6.25125	0	0.697813	0.431098	0.697813	none available
C15H11.11	WBGene00007619	C15H11.11	6f8b4400-172a-464b-9c28-22c73e48039b	3.42736	0.571227	0	2.85614	10.2821	1.71368	2.31716	6.25125	0.333333	0	0.45689	-0.333333	none available
C15H11.11	WBGene00007619	C15H11.11	4637349b-f185-401a-9e29-1dccd037943c	0.44224	0.44224	0	0	10.2821	1.71368	2.31716	6.25125	0.258065	0	0	-0.258065	none available
C15H11.3	WBGene00003834	nxf-1	907c31cf-f0ce-4e01-94c9-e69c229a4ce4	31.8413	13.844	15.2284	2.76881	49.0834	25.7901	18.4138	4.87953	0.536798	0.827012	0.567433	0.290215	nxf-1 encodes a homolog of human TAP protein, a member of the Concise description: nxf-1 encodes a homolog of human TAP protein, a member of the NXF family of shuttling transport receptors for nuclear export of mRNA; binds RNA
C16A11.3	WBGene00015816	C16A11.3	9e8a6dfc-6467-42de-9560-ae0f2ddbe771	3.3168	0.663361	0.663361	1.99008	19.2375	0.663361	7.29697	11.2771	1	0.0909091	0.176471	-0.909091	none available
C16A11.3	WBGene00015816	C16A11.3	770042de-5c1e-4dfd-a830-51ace1269cb9	5.30688	0	3.98016	1.32672	19.2375	0.663361	7.29697	11.2771	0	0.545455	0.117647	0.545455	none available
C16A11.3	WBGene00015816	C16A11.3	5081733f-5765-492f-ab7f-c74e70293f40	9.28705	0	2.65344	6.63361	19.2375	0.663361	7.29697	11.2771	0	0.363636	0.588235	0.363636	none available
C16C8.12	WBGene00015850	C16C8.12	6d076dcf-c07a-44e9-b7de-f9d0560f9c1f	4.31184	2.15592	0	2.15592	65.0093	10.4163	4.35923	50.2338	0.206975	0	0.0429178	-0.206975	none available
C16C8.5	WBGene00015843	C16C8.5	d34cbd3b-049a-4c58-991a-dde8c9f18667	17.955	6.61498	0.944998	10.395	37.104	9.3215	0.944998	26.8375	0.709648	1	0.387331	0.290352	none available
C16D9.1	WBGene00015857	C16D9.1	C16D9.1.1	6.63361	1.32672	3.3168	1.99008	27.0082	2.73768	18.3349	5.93565	0.484615	0.180901	0.335276	-0.303715	none available
C16D9.2	WBGene00004395	rol-3	C16D9.2.1	1.32672	0	1.32672	0	6.6336	1.32672	3.3168	1.99008	0	0.4	0	0.4	rol-3 was identified in screens for recessive mutations that Concise description: rol-3 was identified in screens for recessive mutations that affect body morphology; strong loss-of-function mutations in rol-3 result in early-to-mid larval lethality, while weaker mutations result in animals that are left-handed rollers at the adult stage only; lethal rol-3 mutations are suppressed by mutations
C16D9.2	WBGene00004395	rol-3	3b614aac-483f-4a3d-b134-240e6acde064	1.99008	0	0.995041	0.995041	6.6336	1.32672	3.3168	1.99008	0	0.3	0.5	0.3	rol-3 was identified in screens for recessive mutations that Concise description: rol-3 was identified in screens for recessive mutations that affect body morphology; strong loss-of-function mutations in rol-3 result in early-to-mid larval lethality, while weaker mutations result in animals that are left-handed rollers at the adult stage only; lethal rol-3 mutations are suppressed by mutations
C16D9.2	WBGene00004395	rol-3	60cbe8e3-f6e3-4065-b0a6-b90c5c0f67d1	0.44224	0.44224	0	0	6.6336	1.32672	3.3168	1.99008	0.333333	0	0	-0.333333	rol-3 was identified in screens for recessive mutations that Concise description: rol-3 was identified in screens for recessive mutations that affect body morphology; strong loss-of-function mutations in rol-3 result in early-to-mid larval lethality, while weaker mutations result in animals that are left-handed rollers at the adult stage only; lethal rol-3 mutations are suppressed by mutations
C16D9.2	WBGene00004395	rol-3	05d96b32-9848-4a66-b1b9-9a5a35a566f5	0.44224	0.44224	0	0	6.6336	1.32672	3.3168	1.99008	0.333333	0	0	-0.333333	rol-3 was identified in screens for recessive mutations that Concise description: rol-3 was identified in screens for recessive mutations that affect body morphology; strong loss-of-function mutations in rol-3 result in early-to-mid larval lethality, while weaker mutations result in animals that are left-handed rollers at the adult stage only; lethal rol-3 mutations are suppressed by mutations
C16D9.2	WBGene00004395	rol-3	97bfd711-4a42-4bb7-8907-0041873a434e	0.44224	0.44224	0	0	6.6336	1.32672	3.3168	1.99008	0.333333	0	0	-0.333333	rol-3 was identified in screens for recessive mutations that Concise description: rol-3 was identified in screens for recessive mutations that affect body morphology; strong loss-of-function mutations in rol-3 result in early-to-mid larval lethality, while weaker mutations result in animals that are left-handed rollers at the adult stage only; lethal rol-3 mutations are suppressed by mutations
C16D9.2	WBGene00004395	rol-3	7875a7c1-5fc7-428e-80d5-621b0b846466	1.99008	0	0.995041	0.995041	6.6336	1.32672	3.3168	1.99008	0	0.3	0.5	0.3	rol-3 was identified in screens for recessive mutations that Concise description: rol-3 was identified in screens for recessive mutations that affect body morphology; strong loss-of-function mutations in rol-3 result in early-to-mid larval lethality, while weaker mutations result in animals that are left-handed rollers at the adult stage only; lethal rol-3 mutations are suppressed by mutations
C16D9.6	WBGene00015861	C16D9.6	a5aebacd-173e-461f-a7e8-1e05bf5209cf	1.32672	1.32672	0	0	7.96033	3.64848	4.31184	0	0.363636	0		-0.363636	none available
C16D9.6	WBGene00015861	C16D9.6	C16D9.6.1	3.98016	0.995041	2.98512	0	7.96033	3.64848	4.31184	0	0.272727	0.692308		0.41958	none available
C16D9.9	WBGene00015864	C16D9.9	5d0e1ab6-22e7-4621-94a0-99fd00e7ea6e	5.63856	1.12771	3.38314	1.12771	13.2672	4.44452	6.36826	1.12771	0.253731	0.53125	1	0.277519	none available
C16E9.4	WBGene00002123	inx-1	d229f780-21d8-4b57-93b5-521209cc8d41	12.6038	5.51418	4.72644	2.36322	34.2736	19.8048	9.2098	5.25905	0.278427	0.513197	0.449363	0.234771	inx-1 encodes a predicted member of the innexin family; expressed Concise description: inx-1 encodes a predicted member of the innexin family; expressed
C17E4.2	WBGene00007642	C17E4.2	aeafdc99-0d12-408b-80a1-67d3863b404d	39.2378	39.2378	0	0	84.7443	84.1824	0.561934	0	0.466104	0		-0.466104	none available
C17E4.2	WBGene00007642	C17E4.2	9c63776e-2b73-4d0a-b5c2-d46abeef66fd	12.9245	12.3625	0.561934	0	84.7443	84.1824	0.561934	0	0.146854	1		0.853146	none available
C17E4.2	WBGene00007642	C17E4.2	C17E4.2.1	22.499	22.499	0	0	84.7443	84.1824	0.561934	0	0.267265	0		-0.267265	none available
C17E4.6	WBGene00007645	C17E4.6	d09bd4b2-53e8-4700-8440-6d4e55acacaf	37.4149	20.0437	1.33625	16.035	82.2567	51.1559	1.61455	29.4862	0.391816	0.827629	0.543812	0.435813	none available
C17E7.1	WBGene00015897	nhr-156	6ce95cdf-5bb9-484c-a7c4-b558b8e42c4a	1.32672	0	0.663361	0.663361	4.85201	0.909752	3.2789	0.663361	0	0.202312	1	0.202312	none available
C17E7.1	WBGene00015897	nhr-156	6780fdf3-17be-4e4a-b551-ef3ba76b9bbb	1.51625	0	1.51625	0	4.85201	0.909752	3.2789	0.663361	0	0.462428	0	0.462428	none available
C17E7.4	WBGene00015899	C17E7.4	C17E7.4.1	23.881	15.0109	1.36463	7.50545	58.7074	40.0285	1.96014	16.7188	0.375006	0.696187	0.448923	0.321182	none available
C17F4.12	WBGene00044374	C17F4.12	731737d3-8e27-45f0-8568-db17d3d0b008	1.32672	1.32672	0	0	3.98016	2.65344	1.32672	0	0.5	0		-0.5	none available
C17F4.12	WBGene00044374	C17F4.12	ae248fda-92af-4842-81a2-60086edcdec4	2.65344	1.32672	1.32672	0	3.98016	2.65344	1.32672	0	0.5	1		0.5	none available
C17F4.3	WBGene00015911	C17F4.3	ed2ee911-dcd7-4363-8df8-5bbda2a4b97a	4.4224	2.2112	2.2112	0	9.50817	6.02552	3.48264	0	0.366972	0.634921		0.267948	none available
C17F4.3	WBGene00015911	C17F4.3	4061a22e-d376-46a3-957f-3dec0488ccbc	5.08576	3.81432	1.27144	0	9.50817	6.02552	3.48264	0	0.633028	0.365079		-0.267948	none available
C17F4.6	WBGene00001544	gcy-19	714f63fe-0ed2-4102-9138-83ec4267090b	1.6584	0.5528	0.5528	0.5528	4.9752	0.5528	2.70872	1.71368	1	0.204082	0.322581	-0.795918	gcy-19 encodes a predicted transmembrane guanylyl cyclase; Concise description: gcy-19 encodes a predicted transmembrane guanylyl cyclase; as loss of gcy-19 activity via RNA-mediated interference does not result in any abnormalities, the precise role of GCY-19 in C. elegans development and/or behavior is not yet known; by sequence similarity, however, GCY-19 can be predicted to function
C17F4.6	WBGene00001544	gcy-19	C17F4.6c.1	1.32672	0	1.32672	0	4.9752	0.5528	2.70872	1.71368	0	0.489796	0	0.489796	gcy-19 encodes a predicted transmembrane guanylyl cyclase; Concise description: gcy-19 encodes a predicted transmembrane guanylyl cyclase; as loss of gcy-19 activity via RNA-mediated interference does not result in any abnormalities, the precise role of GCY-19 in C. elegans development and/or behavior is not yet known; by sequence similarity, however, GCY-19 can be predicted to function
C17F4.6	WBGene00001544	gcy-19	16e4f63a-47ad-4d12-8f7f-f96488b0e3cd	1.6584	0	0.829201	0.829201	4.9752	0.5528	2.70872	1.71368	0	0.306122	0.483871	0.306122	gcy-19 encodes a predicted transmembrane guanylyl cyclase; Concise description: gcy-19 encodes a predicted transmembrane guanylyl cyclase; as loss of gcy-19 activity via RNA-mediated interference does not result in any abnormalities, the precise role of GCY-19 in C. elegans development and/or behavior is not yet known; by sequence similarity, however, GCY-19 can be predicted to function
C17G1.5	WBGene00007652	C17G1.5	1e230a38-37a3-4055-a8f7-20cc308ce3d5	46.8143	25.7956	14.3309	6.68776	74.2964	43.3622	17.5894	13.3447	0.594887	0.814747	0.501153	0.21986	none available
C17H11.1	WBGene00015921	C17H11.1	8835ab4b-dbb6-4e88-8b99-5e5bcf70d1a6	1.99008	0	1.99008	0	9.28705	0.810774	8.47627	0	0	0.234783		0.234783	none available
C17H11.1	WBGene00015921	C17H11.1	7f1aa6f4-afa4-4e30-8d43-eb85ee0bb789	2.43232	0	2.43232	0	9.28705	0.810774	8.47627	0	0	0.286957		0.286957	none available
C17H11.1	WBGene00015921	C17H11.1	976671db-5e09-44ac-9a0d-561018d9273f	2.43232	0.810774	1.62155	0	9.28705	0.810774	8.47627	0	1	0.191304		-0.808696	none available
C17H11.2	WBGene00015922	C17H11.2	401cb511-d66f-4bda-bc2d-2e3eba404639	6.19136	5.57223	0	0.619136	23.6599	16.3803	1.22621	6.05333	0.340178	0	0.10228	-0.340178	none available
C17H11.2	WBGene00015922	C17H11.2	C17H11.2.1	13.4883	7.97038	1.22621	4.29174	23.6599	16.3803	1.22621	6.05333	0.486583	1	0.708988	0.513417	none available
C17H12.8	WBGene00015933	C17H12.8	612e15f5-7fe4-44eb-9c2d-3c79db20499b	161.197	1.29997	14.2997	145.597	250.75	1.29997	18.9432	230.507	1	0.754872	0.631638	-0.245128	none available
C17H12.8	WBGene00015933	C17H12.8	868ae38a-b21a-47d2-80c0-e4dbb6b339c2	65.0093	0	3.98016	61.0292	250.75	1.29997	18.9432	230.507	0	0.21011	0.26476	0.21011	none available
C18A11.1	WBGene00015947	C18A11.1	f3a50a6f-0cdd-43c9-b288-62c6d7e55cee	93.4675	6.31537	71.9952	15.1569	134.065	6.75208	109.14	18.1728	0.935322	0.659658	0.834044	-0.275664	none available
C18A11.1	WBGene00015947	C18A11.1	4ffdebf0-c6cc-45bf-86bc-a8e6edbb639f	29.3537	0	28.0194	1.33426	134.065	6.75208	109.14	18.1728	0	0.256729	0.0734208	0.256729	none available
C18A11.2	WBGene00015948	C18A11.2	875fda50-5620-4848-8442-95288b8bd325	21.8909	0.841958	21.0489	0	41.1284	2.75637	38.372	0	0.305459	0.54855		0.24309	none available
C18A3.8	WBGene00001958	hlh-14	C18A3.8.1	43.7818	42.4551	1.32672	0	57.9335	55.5012	1.32672	1.1056	0.76494	1	0	0.23506	hlh-14 encodes a basic helix-loop-helix (bHLH) transcription Concise description: hlh-14 encodes a basic helix-loop-helix (bHLH) transcription factor that is one of five C. elegans Achaete-Scute family homologs; HLH-14 activity is required generally for normal egg-laying, movement, body morphology, and larval development; more specifically, HLH-14 is required for proper neuronal development, part…
C18B12.4	WBGene00007666	C18B12.4	7306534c-8e4c-4608-bdb5-0fdfaa6270e2	105.708	50.8672	27.0232	27.818	177.117	100.628	34.6006	41.8888	0.505498	0.781005	0.664093	0.275507	none available
C18B12.6	WBGene00007668	C18B12.6	19d1eb7d-ba0b-4455-a719-37af58a67c22	5.03048	2.51524	0	2.51524	14.207	6.68889	1.32672	6.19136	0.376033	0	0.40625	-0.376033	none available
C18B12.6	WBGene00007668	C18B12.6	0b04d029-3a1a-41a1-b143-65eaf53023e0	3.0404	1.82424	0	1.21616	14.207	6.68889	1.32672	6.19136	0.272727	0	0.196429	-0.272727	none available
C18B12.6	WBGene00007668	C18B12.6	57002dfb-9d67-4812-82da-7faee1d35712	1.32672	0	1.32672	0	14.207	6.68889	1.32672	6.19136	0	1	0	1	none available
C18C4.2	WBGene00000477	cft-1	C18C4.2.1	1.32672	0	1.32672	0	3.98016	1.32672	2.65344	0	0	0.5		0.5	none available
C18C4.2	WBGene00000477	cft-1	8cca5aa4-44ec-4be8-a7d1-6d9e8888fac0	2.65344	1.32672	1.32672	0	3.98016	1.32672	2.65344	0	1	0.5		-0.5	none available
C18C4.3	WBGene00015965	ugt-48	6ec084d5-17d1-46e8-a23c-1888a4a945a8	74.5175	13.4376	28.0968	32.9832	99.0044	24.6668	36.116	38.2217	0.544764	0.77796	0.862944	0.233195	none available
C18C4.7	WBGene00015968	C18C4.7	bcec5e4d-2cb1-480b-aeca-30dd6e50580b	28.3975	11.359	13.2522	3.78633	129.26	84.1389	33.3726	11.7487	0.135003	0.397097	0.322277	0.262094	none available
C18D1.3	WBGene00001447	flp-4	e59b71d0-d027-4f2a-b555-999b3ea581aa	139.376	1.27868	118.917	19.1801	174.814	1.27868	154.355	19.1801	1	0.770411	1	-0.229589	none available
C18D11.3	WBGene00007681	C18D11.3	9a00a619-9d90-45a9-9de4-666662544704	54.6286	7.71926	2.96895	43.9404	172.265	15.7501	10.6691	145.846	0.490109	0.278275	0.30128	-0.211834	none available
C18D11.6	WBGene00007682	C18D11.6	C18D11.6.1	18.2898	1.3548	16.935	0	85.9241	3.18448	82.7397	0	0.425438	0.204678		-0.22076	none available
C18D4.11	WBGene00195060	linc-14	25e8530b-4163-4844-97e5-8f2cf9b3c565	9.83985	1.96797	4.91992	2.95195	12.7144	3.95805	4.91992	3.83643	0.497207	1	0.769452	0.502793	none available
C18D4.11	WBGene00195060	linc-14	C18D4.11a	1.32672	1.32672	0	0	12.7144	3.95805	4.91992	3.83643	0.335196	0	0	-0.335196	none available
C18D4.6	WBGene00007675	C18D4.6	8366b48a-2b3c-4022-b2c1-7e573b9658d6	19.0565	11.6457	4.23479	3.17609	27.8611	18.6491	4.23479	4.97721	0.624461	1	0.638126	0.375539	none available
C18E3.8	WBGene00001985	hop-1	C18E3.8.1	19.2375	6.63361	0	12.6038	85.6367	27.3531	2.79604	55.4876	0.242518	0	0.227147	-0.242518	hop-1 encodes one of three C. elegans presenilins (the other Concise description: hop-1 encodes one of three C. elegans presenilins (the other two presenilins are encoded by sel-12 and spe-4); originally identified on the basis of its sequence similarity to SEL-12 and the human PS1 and PS2 presenilins, HOP-1 has been shown to function redundantly with SEL-12 in embryonic, larval, and germline dev…
C18E9.6	WBGene00007686	tomm-40	C18E9.6.1	15.2573	3.98016	3.3168	7.96033	161.905	67.8024	11.6956	82.4072	0.0587024	0.283593	0.0965975	0.224891	none available
C18E9.7	WBGene00007687	C18E9.7	3d7fe697-f2f7-49c6-8cac-995f08c14531	1.51625	1.01084	0.505418	0	5.30688	4.80147	0.505418	0	0.210526	1		0.789474	none available
C18E9.7	WBGene00007687	C18E9.7	06998be8-5afe-4fef-bb7c-487da16087f5	1.99008	1.99008	0	0	5.30688	4.80147	0.505418	0	0.414474	0		-0.414474	none available
C18F3.2	WBGene00004732	sax-7	cab46af0-8d3a-41de-af05-06e2534469e0	33.7998	16.8999	4.82854	12.0714	61.0292	27.4926	12.0189	21.5177	0.614707	0.401746	0.560998	-0.212961	sax-7 encodes an ortholog of human L1CAM, and a paralog of Concise description: sax-7 encodes an ortholog of human L1CAM, and a paralog of lad-2; L1CAM is a member of the group of highly conserved transmembrane cell adhesion receptor molecules which belong to the immunuglobulin superfamily; SAX-7 is required for axon guidance, neurite outgrowth and maintenance of neuronal positioning through homo…
C18G1.6	WBGene00015984	C18G1.6	5b6a3125-fca0-47fd-a799-2efbd249a58a	6.19136	1.03189	4.12758	1.03189	10.3926	3.13254	6.22822	1.03189	0.329412	0.662722	1	0.33331	none available
C18G1.6	WBGene00015984	C18G1.6	a869a4f4-a0e3-486c-af53-4174e5cc445d	2.65344	1.32672	1.32672	0	10.3926	3.13254	6.22822	1.03189	0.423529	0.213018	0	-0.210512	none available
C18H7.1	WBGene00015993	C18H7.1	81c27833-1a92-44e8-89b9-2a6ec39c5ef4	62.0353	0	62.0353	0	96.8506	0.834729	95.3083	0	0	0.65089		0.65089	none available
C18H7.1	WBGene00015993	C18H7.1	39c3b7c3-1cca-4f16-a19d-2cbec5c4a5cf	22.2336	0	22.2336	0	96.8506	0.834729	95.3083	0	0	0.233281		0.233281	none available
C18H7.1	WBGene00015993	C18H7.1	4665c1f7-73ab-4bc0-ad22-650add0b1269	1.66946	0.834729	0.834729	0	96.8506	0.834729	95.3083	0	1	0.00875819		-0.991242	none available
C18H7.2	WBGene00002140	inx-18	1b38fabd-c747-4481-9c26-843eaf48ae83	3.53792	1.76896	1.17931	0.589654	22.5543	16.5634	3.54116	2.44974	0.1068	0.333028	0.240701	0.226229	inx-18 encodes a predicted member of the innexin family.
C18H9.6	WBGene00016004	C18H9.6	C18H9.6.1	42.4551	6.63361	1.32672	34.4947	140.367	21.359	22.3049	96.7031	0.310576	0.0594811	0.356708	-0.251095	none available
C18H9.7	WBGene00004507	rpy-1	35a6ee94-2feb-4efc-8d6b-2a3a9179f9b2	3.98016	0	3.98016	0	42.4551	15.8654	14.511	12.0787	0	0.274286	0	0.274286	rpy-1 is orthologous to the human gene 43KDA ACETYLCHOLINE Concise description: rpy-1 is orthologous to the human gene 43KDA ACETYLCHOLINE RECEPTOR-ASSOCIATED PROTEIN (RAPSN; OMIM:601592), which when mutated leads to congenital
C18H9.7	WBGene00004507	rpy-1	e33b78be-0544-4e2d-a638-fd812668c764	22.5543	8.45785	4.22892	9.86749	42.4551	15.8654	14.511	12.0787	0.533101	0.291429	0.816934	-0.241672	rpy-1 is orthologous to the human gene 43KDA ACETYLCHOLINE Concise description: rpy-1 is orthologous to the human gene 43KDA ACETYLCHOLINE RECEPTOR-ASSOCIATED PROTEIN (RAPSN; OMIM:601592), which when mutated leads to congenital
C18H9.8	WBGene00016005	ift-74	5e768878-de3b-4a0a-b636-8db97cac3cf2	6.63361	5.30688	1.32672	0	10.6138	7.29697	3.3168	0	0.727273	0.4		-0.327273	ift-74 encodes a protein that interacts with the intraflagellar Concise description: ift-74 encodes a protein that interacts with the intraflagellar transport (IFT) component IFT-81; ift-74 along with ift-81 is involved in growth, chemotaxis, intraflagellar transport and the morphogenesis of cilia; ift-74 colocalizes with ift-81 in the ciliary transition zone; ift-74 binds ift-81 in protien bindi…
C18H9.8	WBGene00016005	ift-74	deb95e7b-048f-4671-b7e4-0adf49dd3fd4	3.98016	1.99008	1.99008	0	10.6138	7.29697	3.3168	0	0.272727	0.6		0.327273	ift-74 encodes a protein that interacts with the intraflagellar Concise description: ift-74 encodes a protein that interacts with the intraflagellar transport (IFT) component IFT-81; ift-74 along with ift-81 is involved in growth, chemotaxis, intraflagellar transport and the morphogenesis of cilia; ift-74 colocalizes with ift-81 in the ciliary transition zone; ift-74 binds ift-81 in protien bindi…
C23H3.9	WBGene00016022	C23H3.9	7ba8bbc4-e4e4-4691-9325-0b9d9f3eb38a	29.4169	26.9133	2.50356	0	100.831	77.5749	22.1743	1.08154	0.346933	0.112904	0	-0.234029	none available
C23H3.9	WBGene00016022	C23H3.9	491a3ba0-8e41-46aa-b6b9-83ce897bcefa	33.7287	29.8369	3.24315	0.648629	100.831	77.5749	22.1743	1.08154	0.384621	0.146257	0.599729	-0.238364	none available
C23H4.2	WBGene00007691	C23H4.2	fa772a65-08ac-4d5f-acfb-7633f7278db9	5.97024	1.49256	1.49256	2.98512	15.9207	10.3374	2.59816	2.98512	0.144385	0.574468	1	0.430083	none available
C23H4.2	WBGene00007691	C23H4.2	ea65721d-44c2-40d0-9f04-f8526cc75fe4	2.65344	2.65344	0	0	15.9207	10.3374	2.59816	2.98512	0.256684	0	0	-0.256684	none available
C23H4.6	WBGene00007694	C23H4.6	e463bf6f-19fc-4bd0-86a9-3ea807fcf18e	11.9405	5.97024	4.7762	1.19405	13.9306	7.96033	4.7762	1.19405	0.75	1	1	0.25	none available
C23H4.6	WBGene00007694	C23H4.6	b6b19e5a-68c0-4c54-bbb3-30ae9c9d4c06	1.99008	1.99008	0	0	13.9306	7.96033	4.7762	1.19405	0.25	0	0	-0.25	none available
C24A8.6	WBGene00044004	C24A8.6	e467c8ce-fb58-4546-a2bc-0ccba89e2cdb	1.32672	1.32672	0	0	5.30688	1.32672	3.98016	0	1	0		-1	none available
C24A8.6	WBGene00044004	C24A8.6	fc55344b-8d53-44d0-845a-f15433f69b28	1.32672	0	1.32672	0	5.30688	1.32672	3.98016	0	0	0.333333		0.333333	none available
C24A8.6	WBGene00044004	C24A8.6	cdfd08a6-b4bd-432f-ba8c-7d6cd895ce7c	1.32672	0	1.32672	0	5.30688	1.32672	3.98016	0	0	0.333333		0.333333	none available
C24B9.3	WBGene00016048	C24B9.3	317c86d9-a1bd-416e-9d4f-f5832f595fb3	7.63338	0.477087	5.72504	1.43126	317.856	1.85657	207.187	108.812	0.256972	0.0276322	0.0131535	-0.22934	none available
C24D10.5	WBGene00016056	C24D10.5	1198c55e-01ab-41a3-bed7-220d2d734552	17.8002	10.1715	0.847627	6.78102	26.645	17.6589	0.847627	8.13845	0.576	1	0.833208	0.424	none available
C24D10.5	WBGene00016056	C24D10.5	dc7c433b-0ee3-4ea7-8b18-e768c9529df4	4.9752	4.47768	0	0.49752	26.645	17.6589	0.847627	8.13845	0.253565	0	0.0611321	-0.253565	none available
C24G6.7	WBGene00001710	grl-1	188196a6-604a-4895-9fb8-c07747c80c43	6.63361	3.98016	2.65344	0	27.8611	21.5007	5.34591	1.01455	0.185118	0.49635	0	0.311232	grl-1 encodes a hedgehog-like protein, with an N-terminal signal Concise description: grl-1 encodes a hedgehog-like protein, with an N-terminal signal sequence, a central proline-rich region, and a C-terminal Ground-like (Grl) domain; GRL-1 is expressed in intestine, neurons, and larval arcade cells; the Grl domain is predicted to form a cysteine-crosslinked protein involved in intercellular sign…
C24G6.7	WBGene00001710	grl-1	a8ab69cd-a199-4bb8-8604-1499635927fa	17.2474	14.2037	2.0291	1.01455	27.8611	21.5007	5.34591	1.01455	0.660617	0.379562	1	-0.281055	grl-1 encodes a hedgehog-like protein, with an N-terminal signal Concise description: grl-1 encodes a hedgehog-like protein, with an N-terminal signal sequence, a central proline-rich region, and a C-terminal Ground-like (Grl) domain; GRL-1 is expressed in intestine, neurons, and larval arcade cells; the Grl domain is predicted to form a cysteine-crosslinked protein involved in intercellular sign…
C24H12.1	WBGene00016071	C24H12.1	64220416-1042-4c48-a125-d0f032fc49f6	29.6301	28.3955	1.23459	0	70.3162	69.0816	1.23459	0	0.411043	1		0.588957	This gene encodes a protein containing an F-box, a motif predicted Concise description: This gene encodes a protein containing an F-box, a motif predicted to mediate protein-protein interactions either with homologs of yeast Skp-1p or with other proteins; its encoded protein also contains a Pfam-B45 motif of presently
C25A1.2	WBGene00001442	fkh-10	C25A1.2.1	2.2112	2.2112	0	0	9.28705	7.51809	1.76896	0	0.294118	0		-0.294118	fkh-10 encodes one of 15 forkhead transcriptional regulators Concise description: fkh-10 encodes one of 15 forkhead transcriptional regulators encoded by the C. elegans genome; by homology, FKH-10 is predicted to function as a transcription factor that regulates gene expression during development; however, as loss of fkh-10 activity via RNA-mediated interference (RNAi) does not result in any obvi…
C25A1.2	WBGene00001442	fkh-10	e7824ce8-fef3-46fa-9e7e-0d25c8bc2f59	6.19136	4.4224	1.76896	0	9.28705	7.51809	1.76896	0	0.588235	1		0.411765	fkh-10 encodes one of 15 forkhead transcriptional regulators Concise description: fkh-10 encodes one of 15 forkhead transcriptional regulators encoded by the C. elegans genome; by homology, FKH-10 is predicted to function as a transcription factor that regulates gene expression during development; however, as loss of fkh-10 activity via RNA-mediated interference (RNAi) does not result in any obvi…
C25A1.9	WBGene00007710	rsa-1	f4ec8de4-cb69-4528-be58-d433fc9be719	277.566	137.083	21.5255	118.957	431.184	233.365	26.1045	171.715	0.587421	0.824589	0.692758	0.237168	rsa-1 encodes a protein phosphatase 2A (PP2A) regulatory subunit Concise description: rsa-1 encodes a protein phosphatase 2A (PP2A) regulatory subunit of the B'' class; RSA-1 is required for localization of C. elegans PP2A to centrosomes and for mitotic spindle assembly; RSA-1 physically interacts with the LET-92 PP2A catalytic subunit and the PAA-1 PP2A structural subunit; centrosomal levels of …
C25D7.15	WBGene00007722	C25D7.15	7dcb9226-99dc-40fc-9660-acdc0867c43a	4.86464	0	4.16969	0.694949	19.9008	0.958187	15.3731	3.56951	0	0.271233	0.19469	0.271233	none available
C25D7.15	WBGene00007722	C25D7.15	803b3623-36c5-4fe5-9f62-0aa023f478d1	11.4982	0.958187	7.6655	2.87456	19.9008	0.958187	15.3731	3.56951	1	0.49863	0.80531	-0.50137	none available
C25D7.15	WBGene00007722	C25D7.15	51b48206-b178-40f3-b820-245cca21c940	3.53792	0	3.53792	0	19.9008	0.958187	15.3731	3.56951	0	0.230137	0	0.230137	none available
C25E10.10	WBGene00016099	C25E10.10	9154c317-bbbc-4bbc-8015-39ac173f4f1e	11.1903	0.559513	2.23805	8.39269	55.3669	1.52203	15.3341	38.5107	0.367611	0.145952	0.217931	-0.221659	C25E10.10 encodes a putative secreted TIL-domain protease inhibitor Concise description: C25E10.10 encodes a putative secreted TIL-domain protease inhibitor paralogous to SWM-1, ISL-1, and the products of 11 other C. elegans genes; C25E10.10 and its relatives are collectively similar to other TIL-domain protease inhibitors from nematodes, insects, and vertebrates; C25E10.10 has no obvious functio…
C25E10.10	WBGene00016099	C25E10.10	4ecce13c-ebf8-4782-a7d6-14dd51f147ba	3.22993	0.538322	1.07664	1.61497	55.3669	1.52203	15.3341	38.5107	0.353688	0.0702122	0.0419355	-0.283476	C25E10.10 encodes a putative secreted TIL-domain protease inhibitor Concise description: C25E10.10 encodes a putative secreted TIL-domain protease inhibitor paralogous to SWM-1, ISL-1, and the products of 11 other C. elegans genes; C25E10.10 and its relatives are collectively similar to other TIL-domain protease inhibitors from nematodes, insects, and vertebrates; C25E10.10 has no obvious functio…
C25E10.11	WBGene00016100	C25E10.11	391ee95b-44b4-4e87-9ece-0174c0beec9b	1.99008	0	1.99008	0	7.96033	3.58215	4.37818	0	0	0.454545		0.454545	none available
C25E10.11	WBGene00016100	C25E10.11	a1eef757-bf8f-45d1-8143-4407d8e5872e	5.97024	3.58215	2.3881	0	7.96033	3.58215	4.37818	0	1	0.545455		-0.454545	none available
C25E10.12	WBGene00016101	C25E10.12	f00e0123-3b14-4d95-a485-4350ff5d6d2e	60.0994	11.4896	22.9792	25.6306	105.932	17.5527	50.5647	37.815	0.654577	0.454452	0.67779	-0.200125	C25E10.12 encodes one of three C. elegans metallophoshopesterase Concise description: C25E10.12 encodes one of three C. elegans metallophoshopesterase that are related to human 239FB, which is encoded by a gene in the 11p13-p14 chromosomal region associated with various tumors and WAGR (Wilms' tumor, aniridia, genitourinary anomalies, and mental retardation) syndrome; large-scale expression studi…
C25E10.5	WBGene00016095	C25E10.5	d5bd4642-b673-4533-a8bf-2768fbe46e90	2.65344	1.32672	0	1.32672	23.3945	3.19298	11.5137	8.68781	0.415512	0	0.152711	-0.415512	none available
C25E10.5	WBGene00016095	C25E10.5	8d5a8fb7-4966-4bf8-b5cd-c67688086ecb	4.02439	0	2.68292	1.34146	23.3945	3.19298	11.5137	8.68781	0	0.23302	0.154407	0.23302	none available
C25E10.8	WBGene00016097	C25E10.8	efb049a9-d45f-4450-968e-c8a0db2ceb4d	58.2935	1.18966	30.9312	26.1726	94.1689	1.18966	53.452	39.5272	1	0.578672	0.662141	-0.421328	C25E10.8 encodes a putative secreted TIL-domain protease inhibitor Concise description: C25E10.8 encodes a putative secreted TIL-domain protease inhibitor paralogous to SWM-1, ISL-1, and the products of 11 other C. elegans genes; C25E10.8 and its relatives are collectively similar to other TIL-domain protease inhibitors from nematodes, insects, and vertebrates; despite both swm-1 and C25E10.8 bei…
C25E10.9	WBGene00023417	swm-1	721da81e-95f6-421e-961d-dc302d4e1268	9.95041	0.663361	3.3168	5.97024	16.584	0.663361	5.528	10.3926	1	0.6	0.574468	-0.4	swm-1 encodes a putative secreted TIL-domain protease inhibitor Concise description: swm-1 encodes a putative secreted TIL-domain protease inhibitor that, in males, inhibits unpolarized round spermatids from remodelling themselves into motile spermatozoa until their transfer to a hermaphrodite; SWM-1 is also required for efficient sperm transfer, and thus for male fertility; SWM-1 is biologically…
C25E10.9	WBGene00023417	swm-1	f663f6c9-48b7-40f4-939a-335a1deb342a	6.63361	0	2.2112	4.4224	16.584	0.663361	5.528	10.3926	0	0.4	0.425532	0.4	swm-1 encodes a putative secreted TIL-domain protease inhibitor Concise description: swm-1 encodes a putative secreted TIL-domain protease inhibitor that, in males, inhibits unpolarized round spermatids from remodelling themselves into motile spermatozoa until their transfer to a hermaphrodite; SWM-1 is also required for efficient sperm transfer, and thus for male fertility; SWM-1 is biologically…
C25F6.7	WBGene00016106	C25F6.7	de6cb5bc-67a4-46e1-88f8-f2c7849348a9	16.9267	16.2215	0	0.705281	60.4653	55.7772	3.9828	0.705281	0.290826	0	1	-0.290826	none available
C25F6.7	WBGene00016106	C25F6.7	C25F6.7b.1	20.6858	18.2232	2.46259	0	60.4653	55.7772	3.9828	0.705281	0.326714	0.618308	0	0.291594	none available
C25F9.1	WBGene00005832	srw-85	ffed234a-76ba-48e0-b03c-2d97714cdcfe	4.51085	2.25543	2.25543	0	11.6751	7.62865	4.0465	0	0.295652	0.557377		0.261725	none available
C25F9.12	WBGene00045412	C25F9.12	6e568d14-870b-4e01-aaa2-a76ad7de6fe6	4.31184	2.58711	1.72474	0	10.2821	3.52687	6.75522	0	0.733542	0.255319		-0.478223	none available
C25F9.12	WBGene00045412	C25F9.12	2f32f144-9d25-4be8-932b-f9335f2dc4e9	5.63856	0.939761	4.6988	0	10.2821	3.52687	6.75522	0	0.266458	0.695581		0.429123	none available
C25F9.14	WBGene00045461	C25F9.14	188a2dfa-7755-448e-b6a5-a0b62f7e16e5	27.9717	7.83208	12.3075	7.83208	45.1085	16.2768	15.2237	13.6081	0.481182	0.808446	0.575547	0.327265	none available
C25F9.6	WBGene00007726	C25F9.6	C25F9.6.1	1.99008	0	1.32672	0.663361	21.2275	9.85564	6.34931	5.02259	0	0.208955	0.132075	0.208955	none available
C25F9.7	WBGene00005833	srw-86	076d8134-75bf-4459-9d62-379940911fa9	0.589654	0.294827	0.294827	0	6.44197	0.722326	5.71964	0	0.408163	0.0515464		-0.356617	none available
C25F9.7	WBGene00005833	srw-86	07d40b36-5044-47c2-b553-afe033e2aba3	0.854998	0.427499	0.427499	0	6.44197	0.722326	5.71964	0	0.591837	0.0747423		-0.517094	none available
C25F9.7	WBGene00005833	srw-86	390fa807-6598-454b-ac83-1a870c58ba08	3.72956	0	3.72956	0	6.44197	0.722326	5.71964	0	0	0.652062		0.652062	none available
C25F9.9	WBGene00007728	C25F9.9	469145e0-5d0f-4b46-9811-4da3e0bcb074	4.64352	1.16088	2.32176	1.16088	6.63361	1.16088	3.3168	2.15592	1	0.7	0.538462	-0.3	none available
C25F9.9	WBGene00007728	C25F9.9	ecff3580-a31e-4394-9cdb-859081b0aba0	1.99008	0	0.995041	0.995041	6.63361	1.16088	3.3168	2.15592	0	0.3	0.461538	0.3	none available
C25G6.1	WBGene00016107	C25G6.1	209ec5b8-967c-4cda-89c8-82b4a50935bc	1.99008	0.995041	0.995041	0	18.5741	2.10064	12.4933	3.98016	0.473684	0.079646	0	-0.394038	none available
C25G6.1	WBGene00016107	C25G6.1	C25G6.1.1	9.28705	0	5.30688	3.98016	18.5741	2.10064	12.4933	3.98016	0	0.424779	1	0.424779	none available
C25G6.1	WBGene00016107	C25G6.1	bf77211a-8a1b-4035-a89c-2dd4e2b68378	3.3168	0	3.3168	0	18.5741	2.10064	12.4933	3.98016	0	0.265487	0	0.265487	none available
C25G6.1	WBGene00016107	C25G6.1	61d38501-f674-4912-96c2-617f5288b643	3.3168	1.1056	2.2112	0	18.5741	2.10064	12.4933	3.98016	0.526316	0.176991	0	-0.349325	none available
C26B9.2	WBGene00016132	C26B9.2	0b474e89-69da-44d2-98f4-721c66c8afbe	4.64352	2.32176	2.32176	0	5.30688	2.32176	2.98512	0	1	0.777778		-0.222222	none available
C26B9.2	WBGene00016132	C26B9.2	e5105da8-d219-491a-83d6-f1907584eea6	0.663361	0	0.663361	0	5.30688	2.32176	2.98512	0	0	0.222222		0.222222	none available
C26B9.6	WBGene00016135	C26B9.6	8bc32254-2d34-4eb8-9764-9ebe0fedc89b	3.09568	3.09568	0	0	9.28705	7.96033	1.32672	0	0.388889	0		-0.388889	none available
C26B9.6	WBGene00016135	C26B9.6	3d1e98c6-9755-4fc4-8c32-2aef395b4cdc	1.76896	1.76896	0	0	9.28705	7.96033	1.32672	0	0.222222	0		-0.222222	none available
C26B9.6	WBGene00016135	C26B9.6	c7af072a-35dd-464a-884b-01586cd113eb	3.98016	2.65344	1.32672	0	9.28705	7.96033	1.32672	0	0.333333	1		0.666667	none available
C26B9.7	WBGene00016136	C26B9.7	70867c4a-d5bb-4df7-9048-bc8685d648aa	4.20128	4.20128	0	0	17.6896	16.5656	1.12403	0	0.253615	0		-0.253615	none available
C26B9.7	WBGene00016136	C26B9.7	534222c6-33c3-411a-8641-314e7f4390a2	13.4883	12.3643	1.12403	0	17.6896	16.5656	1.12403	0	0.746385	1		0.253615	none available
C26C6.3	WBGene00003552	nas-36	2371d6ff-1607-4d1c-9738-6b2cb7b19083	0.33168	0.33168	0	0	2.65344	1.32672	1.32672	0	0.25	0		-0.25	nas-36 encodes an astacin-like protease; nas-36 activity is Concise description: nas-36 encodes an astacin-like protease; nas-36 activity is
C26C6.3	WBGene00003552	nas-36	474c50a9-bd3c-4a6f-b11f-3014b31cacb5	1.32672	0	1.32672	0	2.65344	1.32672	1.32672	0	0	1		1	nas-36 encodes an astacin-like protease; nas-36 activity is Concise description: nas-36 encodes an astacin-like protease; nas-36 activity is
C26C6.3	WBGene00003552	nas-36	9e4528fb-cca4-4cda-8399-6a4a2d5a6b30	0.33168	0.33168	0	0	2.65344	1.32672	1.32672	0	0.25	0		-0.25	nas-36 encodes an astacin-like protease; nas-36 activity is Concise description: nas-36 encodes an astacin-like protease; nas-36 activity is
C26C6.3	WBGene00003552	nas-36	e37eafd3-b044-4fc4-9afa-b114df1c5f95	0.33168	0.33168	0	0	2.65344	1.32672	1.32672	0	0.25	0		-0.25	nas-36 encodes an astacin-like protease; nas-36 activity is Concise description: nas-36 encodes an astacin-like protease; nas-36 activity is
C26C6.3	WBGene00003552	nas-36	1a6aca91-d8e0-4e39-9252-b504a15dc1b5	0.33168	0.33168	0	0	2.65344	1.32672	1.32672	0	0.25	0		-0.25	nas-36 encodes an astacin-like protease; nas-36 activity is Concise description: nas-36 encodes an astacin-like protease; nas-36 activity is
C26C6.4	WBGene00007739	C26C6.4	a5644d5b-b4cb-4917-891a-bb0f447ae4b6	1.32672	0	1.32672	0	2.65344	1.32672	1.32672	0	0	1		1	none available
C26C6.4	WBGene00007739	C26C6.4	36e429ac-0e2c-4ead-9902-b74606c8660f	1.32672	1.32672	0	0	2.65344	1.32672	1.32672	0	1	0		-1	none available
C26D10.3	WBGene00007744	C26D10.3	22e2c882-0282-4bb6-9742-3ac23d8a84d0	9.28705	1.16088	1.16088	6.96529	15.9207	4.6988	2.4876	8.73425	0.247059	0.466667	0.797468	0.219608	none available
C26D10.3	WBGene00007744	C26D10.3	29e4732e-431e-4241-aa0e-1e70a2afc12b	1.32672	0	1.32672	0	15.9207	4.6988	2.4876	8.73425	0	0.533333	0	0.533333	none available
C26D10.3	WBGene00007744	C26D10.3	444c4f97-1ae3-44a8-9de9-42857e3fde5c	3.3168	2.2112	0	1.1056	15.9207	4.6988	2.4876	8.73425	0.470588	0	0.126582	-0.470588	none available
C26D10.6	WBGene00007746	C26D10.6	C26D10.6a.1	2.65344	1.99008	0	0.663361	50.0306	9.83312	26.8407	13.3568	0.202385	0	0.0496645	-0.202385	none available
C26E1.2	WBGene00007748	C26E1.2	0662f1b2-0517-4883-a05a-a29155224d7e	5.30688	0	5.30688	0	11.9405	1.32672	10.6138	0	0	0.5		0.5	none available
C26E1.2	WBGene00007748	C26E1.2	e41722e6-1d7f-4cf1-a814-788dba0cf076	2.65344	1.32672	1.32672	0	11.9405	1.32672	10.6138	0	1	0.125		-0.875	none available
C26E1.3	WBGene00007749	ceh-79	471c21f8-8d4a-4b70-aa56-871b7198d940	8.54998	0.854998	1.71	5.98499	17.1	1.38937	4.52314	11.1875	0.615385	0.378055	0.534973	-0.237329	ceh-79 is a homeobox gene that encodes two divergent homeodomains; Concise description: ceh-79 is a homeobox gene that encodes two divergent homeodomains; ceh-79 is expressed in the gonad, hypodermis, intestine, body wall musculature,
C26E1.3	WBGene00007749	ceh-79	01ac97e6-6052-4f7c-97ad-9054a5c884ab	5.23318	0	1.74439	3.48878	17.1	1.38937	4.52314	11.1875	0	0.38566	0.311848	0.38566	ceh-79 is a homeobox gene that encodes two divergent homeodomains; Concise description: ceh-79 is a homeobox gene that encodes two divergent homeodomains; ceh-79 is expressed in the gonad, hypodermis, intestine, body wall musculature,
C26F1.2	WBGene00016147	cyp-32A1	ce870ea4-787a-42b9-b977-d07d7c8cc7f2	43.5607	0	36.1235	7.43719	75.402	2.04269	62.2064	11.1529	0	0.580704	0.666839	0.580704	none available
C26F1.2	WBGene00016147	cyp-32A1	f5381d07-ba02-4244-ae33-ff5a231d5f8b	3.53792	0.786205	2.35862	0.393103	75.402	2.04269	62.2064	11.1529	0.384888	0.037916	0.0352467	-0.346972	none available
C26F1.5	WBGene00001719	grl-10	67b1dba9-b220-4cda-8f16-9ce00b7924b3	3.5195	1.50836	2.01114	0	67.6628	58.2894	8.36908	1.00425	0.025877	0.240306	0	0.214429	grl-10 encodes a hedgehog-like protein, with an N-terminal Concise description: grl-10 encodes a hedgehog-like protein, with an N-terminal signal sequence and a C-terminal Ground-like (Grl) domain; the Grl domain is predicted to form a cysteine-crosslinked protein involved in intercellular signalling, and
C27A12.4	WBGene00016155	C27A12.4	cb5e1efe-6504-41e7-b0a7-60d587eb559f	2.65344	1.76896	0.884481	0	3.3168	2.43232	0.884481	0	0.727273	1		0.272727	none available
C27A12.4	WBGene00016155	C27A12.4	a27a26b9-33f6-4c9a-b9e6-f384f6489022	0.663361	0.663361	0	0	3.3168	2.43232	0.884481	0	0.272727	0		-0.272727	none available
C27A12.5	WBGene00000429	ceh-2	23dc9de8-8ddc-44d0-9da3-d9852dcaf986	3.98016	3.98016	0	0	7.96033	6.63361	1.32672	0	0.6	0		-0.6	ceh-2 encodes a homeodomain protein homologous to Drosophila Concise description: ceh-2 encodes a homeodomain protein homologous to Drosophila empty spiracles (EMS) and the vertebrate EMX1 and EMX2 proteins (OMIM:600034, 600035); although the exact biological role of CEH-2 in C. elegans development and/or behavior is not yet known, expression in pharyngeal neurons and muscle, as well as vulval ce…
C27A12.5	WBGene00000429	ceh-2	5e0319d0-8944-4d3f-9977-50a279e4d470	1.32672	0	1.32672	0	7.96033	6.63361	1.32672	0	0	1		1	ceh-2 encodes a homeodomain protein homologous to Drosophila Concise description: ceh-2 encodes a homeodomain protein homologous to Drosophila empty spiracles (EMS) and the vertebrate EMX1 and EMX2 proteins (OMIM:600034, 600035); although the exact biological role of CEH-2 in C. elegans development and/or behavior is not yet known, expression in pharyngeal neurons and muscle, as well as vulval ce…
C27A7.4	WBGene00000490	che-11	72e990a7-8af4-4725-9b2f-976ef947be10	0.663361	0.663361	0	0	4.9752	2.98512	1.99008	0	0.222222	0		-0.222222	che-11 encodes a large, unfamiliar protein with orthologs in Concise description: che-11 encodes a large, unfamiliar protein with orthologs in vertebrates and arthropods (e.g., KIAA0590 and CG11838-PA) and in Chlamydomonas (IFT140), as well as distant similarity to OSM-1 and ZK520.1; che-11 is required for normal synthesis of sensory cilia (via intraflagellar transport) in sensory
C27A7.4	WBGene00000490	che-11	a178f25d-9cf7-4ec6-a1a9-7668d1a65914	0.663361	0.663361	0	0	4.9752	2.98512	1.99008	0	0.222222	0		-0.222222	che-11 encodes a large, unfamiliar protein with orthologs in Concise description: che-11 encodes a large, unfamiliar protein with orthologs in vertebrates and arthropods (e.g., KIAA0590 and CG11838-PA) and in Chlamydomonas (IFT140), as well as distant similarity to OSM-1 and ZK520.1; che-11 is required for normal synthesis of sensory cilia (via intraflagellar transport) in sensory
C27A7.6	WBGene00007757	C27A7.6	bf4ead28-7271-4b33-908a-0ad38894260c	47.5145	7.50229	0.833588	39.1786	92.9758	12.4379	3.56477	76.9731	0.603179	0.233841	0.508991	-0.369338	none available
C27A7.8	WBGene00007758	C27A7.8	c973591e-4f34-4a73-9865-1e92e2e82580	0.663361	0.663361	0	0	8.62369	1.99008	6.63361	0	0.333333	0		-0.333333	none available
C27A7.8	WBGene00007758	C27A7.8	5caa8a2e-6388-4079-b9f4-e2ce2f7afeca	2.65344	0	2.65344	0	8.62369	1.99008	6.63361	0	0	0.4		0.4	none available
C27B7.6	WBGene00007763	C27B7.6	da6a2922-a54a-42bb-b764-9b497efa7dea	1.54784	0.515947	0.515947	0.515947	7.07585	0.515947	1.99008	4.56982	1	0.259259	0.112903	-0.740741	none available
C27B7.6	WBGene00007763	C27B7.6	48d18113-7e73-478c-8689-f10c39552019	2.2112	0	1.47413	0.737067	7.07585	0.515947	1.99008	4.56982	0	0.740741	0.16129	0.740741	none available
C27B7.9	WBGene00007765	C27B7.9	fab488f9-ea29-4cbf-8d21-0be793cfa83a	13.3114	0.554643	5.54643	7.21036	61.4272	0.554643	32.6801	28.1924	1	0.169719	0.255755	-0.830281	none available
C27C12.5	WBGene00007775	acd-3	9ce60b5d-cea7-4f41-8d9f-65d4a12dcaaa	1.59475	0	1.06316	0.531582	13.2672	1.47078	5.15165	6.64477	0	0.206373	0.08	0.206373	none available
C27C12.5	WBGene00007775	acd-3	5b8a2116-e283-4949-a5b2-dea32cf878c4	0.663361	0.663361	0	0	13.2672	1.47078	5.15165	6.64477	0.451025	0	0	-0.451025	none available
C27C12.7	WBGene00001055	dpf-2	C27C12.7.2	15.2573	0.803015	1.60603	12.8482	75.402	2.26581	19.1231	54.013	0.354405	0.0839837	0.237873	-0.270422	none available
C27C7.1	WBGene00007766	C27C7.1	b177d167-139c-407b-958d-57c9db52752c	19.4638	7.29894	0.810993	11.3539	161.86	25.733	15.4657	120.661	0.283642	0.0524381	0.0940973	-0.231204	none available
C27D6.12	WBGene00044389	C27D6.12	ff57da59-0212-4dbc-9122-92aa897042c8	191.47	3.32028	156.053	32.096	326.373	3.32028	278.189	44.864	1	0.560961	0.715408	-0.439039	none available
C27F2.1	WBGene00016165	C27F2.1	d19fd443-4096-4842-abbd-11ab5a93c43d	1.32672	0	1.32672	0	6.6336	0.995041	4.75408	0.884481	0	0.27907	0	0.27907	none available
C27F2.1	WBGene00016165	C27F2.1	774dda28-a64f-495d-a17d-a737d92f943c	1.99008	0.995041	0.995041	0	6.6336	0.995041	4.75408	0.884481	1	0.209302	0	-0.790698	none available
C27H5.4	WBGene00016174	C27H5.4	3fafb9b6-d254-4b9b-8281-8cd3778944f8	17.9107	1.55746	3.89364	12.4596	42.6762	2.76256	14.6875	25.2262	0.563772	0.265099	0.493917	-0.298673	none available
C27H5.4	WBGene00016174	C27H5.4	f44fb4bd-9045-4622-b173-1befec484095	9.95041	0	5.68595	4.26446	42.6762	2.76256	14.6875	25.2262	0	0.387129	0.169049	0.387129	none available
C28G1.10	WBGene00219376	C28G1.10	4c645929-a326-4672-bb42-4ce9da341917	1.73737	0	1.15825	0.579124	10.2031	0.766023	4.6251	4.812	0	0.250427	0.12035	0.250427	none available
C28G1.10	WBGene00219376	C28G1.10	81852359-d39a-4b15-a51b-16f3a9e2b745	3.06409	0.766023	1.53205	0.766023	10.2031	0.766023	4.6251	4.812	1	0.331246	0.15919	-0.668754	none available
C28G1.6	WBGene00016191	C28G1.6	e2640409-f591-4266-b785-55a50478f7ca	17.2474	0	7.18641	10.061	27.8611	2.65344	11.1666	14.0411	0	0.643564	0.716535	0.643564	none available
C28G1.6	WBGene00016191	C28G1.6	d6505a0c-2131-44b5-9750-477493ea5a36	7.96033	2.65344	2.65344	2.65344	27.8611	2.65344	11.1666	14.0411	1	0.237624	0.188976	-0.762376	none available
C29A12.6	WBGene00007800	C29A12.6	229072d5-6193-446c-ac4c-ecb5ca9b0f83	9.50817	9.50817	0	0	43.7818	42.1142	1.66761	0	0.225771	0		-0.225771	none available
C29F3.2	WBGene00006954	wrt-8	fa172702-531d-4bf6-b52e-47212e86bc7b	4.64352	2.32176	2.32176	0	7.96033	4.31184	2.32176	1.32672	0.538462	1	0	0.461538	wrt-8 encodes a hedgehog-like protein, with (from N- to C-terminus) Concise description: wrt-8 encodes a hedgehog-like protein, with (from N- to C-terminus) a signal sequence, a Wart domain, an short region of low-complexity sequence, and a Hint/Hog domain; WRT-8 is strongly expressed in hypodermal syncytia hyp6-hyp10 throughout life, and in in 12 subventral P cells and their descendants from 3-f…
C29F3.2	WBGene00006954	wrt-8	542778e6-5e94-4d27-9256-9c28eb7c5e63	1.32672	1.32672	0	0	7.96033	4.31184	2.32176	1.32672	0.307692	0	0	-0.307692	wrt-8 encodes a hedgehog-like protein, with (from N- to C-terminus) Concise description: wrt-8 encodes a hedgehog-like protein, with (from N- to C-terminus) a signal sequence, a Wart domain, an short region of low-complexity sequence, and a Hint/Hog domain; WRT-8 is strongly expressed in hypodermal syncytia hyp6-hyp10 throughout life, and in in 12 subventral P cells and their descendants from 3-f…
C29F3.3	WBGene00007804	C29F3.3	680389a5-c558-4442-9efe-fbb418a2649a	1.76896	0.884481	0.884481	0	11.9405	1.9348	10.0057	0	0.457143	0.0883978		-0.368745	none available
C29F3.5	WBGene00007806	clec-230	C29F3.5.1	21.2275	13.2672	7.96033	0	37.0376	26.086	10.9516	0	0.508594	0.726865		0.218271	none available
C29F3.5	WBGene00007806	clec-230	036f8e5d-ff4c-482a-bab8-31dd2960f096	5.41744	5.41744	0	0	37.0376	26.086	10.9516	0	0.207676	0		-0.207676	none available
C29F4.2	WBGene00007808	best-7	94680dd6-85a9-4a7f-a95b-058d1799abcc	13.2672	1.02055	2.04111	10.2055	18.5741	2.34728	2.04111	14.1857	0.434783	1	0.719424	0.565217	none available
C29F4.2	WBGene00007808	best-7	87bfee2f-927b-40c4-8944-29f3eca63bd9	1.32672	0.663361	0	0.663361	18.5741	2.34728	2.04111	14.1857	0.282609	0	0.0467626	-0.282609	none available
C29F4.2	WBGene00007808	best-7	3e8ef9d7-26af-4f53-85bd-7be34d83f462	0.663361	0.663361	0	0	18.5741	2.34728	2.04111	14.1857	0.282609	0	0	-0.282609	none available
C29F7.10	WBGene00206389	C29F7.10	C29F7.10.1	8.29201	7.01631	0	1.27569	30.1829	23.9873	0.829201	5.36642	0.292501	0	0.237718	-0.292501	none available
C29F7.10	WBGene00206389	C29F7.10	9eebe944-01a4-498c-bcf3-78473016a8ab	14.9256	10.7796	0.829201	3.3168	30.1829	23.9873	0.829201	5.36642	0.449388	1	0.618067	0.550612	none available
C29F9.2	WBGene00016217	C29F9.2	1d8dacfe-9f19-4824-aa41-ecad7a45b08e	3.3168	2.65344	0.663361	0	9.95041	5.30688	3.3168	1.32672	0.5	0.2	0	-0.3	none available
C29F9.2	WBGene00016217	C29F9.2	C29F9.2.1	1.32672	0	1.32672	0	9.95041	5.30688	3.3168	1.32672	0	0.4	0	0.4	none available
C29H12.5	WBGene00016236	cec-9	89707d88-a3d1-473c-b66a-34c653984a63	17.0263	3.40525	2.55394	11.0671	30.5146	7.1127	3.75536	19.6465	0.478756	0.680079	0.563309	0.201322	none available
C30A5.2	WBGene00004342	rfs-1	2863fc1b-e79d-4c37-a7d0-4068fcfdf165	14.5939	2.24522	4.49044	7.85827	19.2375	4.45642	4.49044	10.2906	0.503817	1	0.763636	0.496183	rfs-1 encodes a RAD51-like protein, orthologous to mammalian Concise description: rfs-1 encodes a RAD51-like protein, orthologous to mammalian RAD-51C, that is related to bacterial recA, a multifunctional enzyme involved in DNA repair, homologous recombination, and induction of the SOS response; RFS-1 interacts with RAD-51, a C. elegans RAD51 homolog involved in meiosis and DNA repair, suggesting
C30A5.2	WBGene00004342	rfs-1	f6dea79a-3a04-452f-9dd9-30f323ab5a56	2.65344	1.32672	0	1.32672	19.2375	4.45642	4.49044	10.2906	0.29771	0	0.128926	-0.29771	rfs-1 encodes a RAD51-like protein, orthologous to mammalian Concise description: rfs-1 encodes a RAD51-like protein, orthologous to mammalian RAD-51C, that is related to bacterial recA, a multifunctional enzyme involved in DNA repair, homologous recombination, and induction of the SOS response; RFS-1 interacts with RAD-51, a C. elegans RAD51 homolog involved in meiosis and DNA repair, suggesting
C30F12.1	WBGene00016260	rege-1	4752f162-3c14-4104-ba91-b088ccea665e	19.3547	11.8279	4.30105	3.22579	87.2252	31.1918	37.3492	18.6842	0.379199	0.115158	0.172647	-0.264041	none available
C30F12.4	WBGene00016263	C30F12.4	47020a2d-bf0d-4630-828c-ca72b8848817	226.294	37.537	16.0873	172.67	342.206	70.4108	20.5763	251.219	0.533114	0.781837	0.68733	0.248722	none available
C30F12.6	WBGene00016265	trhr-1	4ab1573e-4ead-4e94-9a30-e68f50b56269	18.353	7.72757	6.76162	3.86378	27.8611	12.2237	8.08834	7.54912	0.63218	0.835971	0.511819	0.203791	none available
C30F8.3	WBGene00016259	C30F8.3	fcdf255d-4ae0-47a1-998b-ea31b4f4d7b3	1.32672	1.32672	0	0	5.30688	4.20128	1.1056	0	0.315789	0		-0.315789	none available
C30F8.3	WBGene00016259	C30F8.3	70e9ebbc-7637-4791-b452-3da8b0cbdd16	3.3168	2.2112	1.1056	0	5.30688	4.20128	1.1056	0	0.526316	1		0.473684	none available
C30G4.4	WBGene00016269	C30G4.4	0bac221b-45ea-4f7d-bec8-1f16046f53be	32.0766	2.46743	17.8889	11.7203	88.655	3.68214	48.8129	36.16	0.670107	0.366478	0.324123	-0.303629	none available
C30G7.1	WBGene00001852	hil-1	C30G7.1.1	115.425	0	113.376	2.04896	438.048	4.50628	422.589	10.9524	0	0.268289	0.187079	0.268289	none available
C30G7.1	WBGene00001852	hil-1	8fc0db81-283e-451c-93ca-a382fe362c6b	205.744	0.883021	196.914	7.94719	438.048	4.50628	422.589	10.9524	0.195953	0.46597	0.725611	0.270016	none available
C30G7.1	WBGene00001852	hil-1	66c7e6cc-2d87-4518-8969-2dd5556bfce4	9.3806	1.44317	7.93743	0	438.048	4.50628	422.589	10.9524	0.320257	0.0187829	0	-0.301474	none available
C30H6.10	WBGene00007827	trh-1	332ef29b-995f-443a-9fd9-17afff427ce2	44.6663	8.45038	33.8015	2.41439	50.8576	12.1357	36.3075	2.41439	0.696323	0.930978	1	0.234655	none available
C30H6.5	WBGene00007823	C30H6.5	C30H6.5b.1	1.32672	0	0.663361	0.663361	3.98016	2.65344	0.663361	0.663361	0	1	1	1	none available
C30H6.5	WBGene00007823	C30H6.5	1c0e2a03-c759-4d67-8dba-0ffeb98fc98e	1.99008	1.99008	0	0	3.98016	2.65344	0.663361	0.663361	0.75	0	0	-0.75	none available
C30H6.5	WBGene00007823	C30H6.5	fe6d74d8-54c3-493b-9704-6881c89ece60	0.663361	0.663361	0	0	3.98016	2.65344	0.663361	0.663361	0.25	0	0	-0.25	none available
C30H6.6	WBGene00001811	haf-1	11004c8b-a248-4da5-91b1-4720b7137299	3.98016	0	2.65344	1.32672	15.9207	5.40165	7.06005	3.45895	0	0.375839	0.383562	0.375839	haf-1 encodes a transmembrane protein that is a member of the Concise description: haf-1 encodes a transmembrane protein that is a member of the ATP-binding cassette (ABC) transporter superfamily; HAF-1 transporter activity is required for peptide transport and functions as part of the mitochondrial unfolded protein response (UPRmt) signaling pathway; as part of the UPRmt, HAF-1 functions upstrea…
C30H6.6	WBGene00001811	haf-1	57d853a8-c3a4-4069-88ae-085b1d4c777c	3.98016	1.99008	0.995041	0.995041	15.9207	5.40165	7.06005	3.45895	0.368421	0.14094	0.287671	-0.227481	haf-1 encodes a transmembrane protein that is a member of the Concise description: haf-1 encodes a transmembrane protein that is a member of the ATP-binding cassette (ABC) transporter superfamily; HAF-1 transporter activity is required for peptide transport and functions as part of the mitochondrial unfolded protein response (UPRmt) signaling pathway; as part of the UPRmt, HAF-1 functions upstrea…
C31C9.1	WBGene00006404	tag-10	C31C9.1a.1	67.9541	2.12357	14.865	50.9656	245.153	35.7886	50.5988	158.766	0.0593364	0.293781	0.321011	0.234445	tag-10 encodes, by alternative splicing, two nearly identical Concise description: tag-10 encodes, by alternative splicing, two nearly identical proteins; TAG-10 proteins are putatively secreted, with an N-terminal signal sequence and four C-terminal WD40 repeats; TAG-10 proteins are orthologous to the GA1 apical gut membrane polyprotein of Haemonchus contortus, and more distantly similar to
C31C9.7	WBGene00007841	C31C9.7	e6466667-afd8-47d6-b21b-c56ea52503db	26.4239	1.05695	5.28477	20.0821	38.1432	1.05695	10.7713	26.315	1	0.490634	0.763145	-0.509366	none available
C31E10.6	WBGene00007847	C31E10.6	C31E10.6.1	26.5344	22.5543	0	3.98016	78.507	55.5722	12.4433	10.4915	0.405855	0	0.379369	-0.405855	none available
C31E10.8	WBGene00007849	tbc-19	2370b978-b57b-47e2-8de1-76d6d02e0f7e	1.32672	1.32672	0	0	7.96033	2.65344	2.65344	1.32672	0.5	0	0	-0.5	none available
C31E10.8	WBGene00007849	tbc-19	f0c00501-a859-4e45-ab43-120193d26d0c	2.65344	1.32672	0	1.32672	7.96033	2.65344	2.65344	1.32672	0.5	0	1	-0.5	none available
C31E10.8	WBGene00007849	tbc-19	04375fba-d917-47f3-92ca-cb6965a869df	2.65344	0	2.65344	0	7.96033	2.65344	2.65344	1.32672	0	1	0	1	none available
C31G12.1	WBGene00007850	C31G12.1	C31G12.1.1	5.83757	4.86464	0.972929	0	18.4856	15.4114	0.972929	2.10131	0.315652	1	0	0.684348	none available
C31G12.1	WBGene00007850	C31G12.1	640a1181-76af-4bd4-97d5-0666ebd8b39a	6.72205	5.60171	0	1.12034	18.4856	15.4114	0.972929	2.10131	0.363478	0	0.533163	-0.363478	none available
C31G12.1	WBGene00007850	C31G12.1	e7020475-44bc-491e-8183-0bad6b3a7c5a	5.39533	4.41436	0	0.980969	18.4856	15.4114	0.972929	2.10131	0.286435	0	0.466837	-0.286435	none available
C31H2.2	WBGene00001070	dpy-8	d9edd68b-e8f1-4130-8af5-fa84d842a8d6	24.0705	0.8915	21.396	1.783	33.6419	0.8915	30.9674	1.783	1	0.690921	1	-0.309079	dpy-8 encodes a collagen with a nematode-specific N-terminal Concise description: dpy-8 encodes a collagen with a nematode-specific N-terminal domain that is required for normal body morphology and (perhaps) for a normal embryonic
C31H2.4	WBGene00016294	C31H2.4	C31H2.4.1	11.9405	8.62369	0	3.3168	24.2127	18.9058	0.663361	4.64352	0.45614	0	0.714286	-0.45614	C31H2.4 encodes a possible 4-hydroxyphenylpyruvate dioxygenase, Concise description: C31H2.4 encodes a possible 4-hydroxyphenylpyruvate dioxygenase, orthologous to human HPDL/GLOXD1, and paralogous to HPD-1 and human HPD (OMIM:609695, mutated in tyrosinemia type III); C31H2.4 has no obvious function in mass RNAi
C31H2.4	WBGene00016294	C31H2.4	8143bb56-cb3a-4591-89f4-85592883b5ee	5.63856	5.63856	0	0	24.2127	18.9058	0.663361	4.64352	0.298246	0	0	-0.298246	C31H2.4 encodes a possible 4-hydroxyphenylpyruvate dioxygenase, Concise description: C31H2.4 encodes a possible 4-hydroxyphenylpyruvate dioxygenase, orthologous to human HPDL/GLOXD1, and paralogous to HPD-1 and human HPD (OMIM:609695, mutated in tyrosinemia type III); C31H2.4 has no obvious function in mass RNAi
C31H2.4	WBGene00016294	C31H2.4	174d6ff1-3aac-4469-8de0-4af2482b6c6f	0.663361	0	0.663361	0	24.2127	18.9058	0.663361	4.64352	0	1	0	1	C31H2.4 encodes a possible 4-hydroxyphenylpyruvate dioxygenase, Concise description: C31H2.4 encodes a possible 4-hydroxyphenylpyruvate dioxygenase, orthologous to human HPDL/GLOXD1, and paralogous to HPD-1 and human HPD (OMIM:609695, mutated in tyrosinemia type III); C31H2.4 has no obvious function in mass RNAi
C31H5.6	WBGene00007857	C31H5.6	C31H5.6a.2	31.8413	0	17.2474	14.5939	74.1932	8.17191	32.1701	33.8512	0	0.536131	0.43112	0.536131	none available
C31H5.6	WBGene00007857	C31H5.6	aeee5cf5-e22a-4b7e-b5c1-2f0d481bedf0	4.19391	1.79739	0.59913	1.79739	74.1932	8.17191	32.1701	33.8512	0.219947	0.0186238	0.0530968	-0.201324	none available
C32B5.1	WBGene00016295	fbxc-40	4ca2c184-a6e4-42c3-b8e9-0540e0f91faf	17.6189	17.6189	0	0	74.1902	72.32	1.87019	0	0.243624	0		-0.243624	none available
C32B5.1	WBGene00016295	fbxc-40	eed733f7-489e-41d9-b608-994b470e3b56	6.63361	5.30688	1.32672	0	74.1902	72.32	1.87019	0	0.0733806	0.709406		0.636025	none available
C32B5.14	WBGene00016307	fbxc-18	abd8c6c6-8323-47f1-be7d-b4c1e82f372f	11.8899	10.701	1.18899	0	97.9436	95.191	2.75263	0	0.112416	0.431949		0.319533	none available
C32B5.14	WBGene00016307	fbxc-18	C32B5.14a.1	69.3812	69.3812	0	0	97.9436	95.191	2.75263	0	0.728863	0		-0.728863	none available
C32B5.14	WBGene00016307	fbxc-18	fe595da3-4ab5-42e4-8585-4a12fd8fdd26	6.34931	5.29109	1.05822	0	97.9436	95.191	2.75263	0	0.0555839	0.384439		0.328855	none available
C32C4.2	WBGene00000174	aqp-6	fc370efa-bf98-498f-8458-b85e56270031	1.1056	0.5528	0.5528	0	1.54784	0.995041	0.5528	0	0.555556	1		0.444444	apq-6 encodes an aquaporin whose expression in Xenopus oocytes Concise description: apq-6 encodes an aquaporin whose expression in Xenopus oocytes increases water permeability five- to seven-fold; AQP-6 is expressed in the cilia
C32C4.2	WBGene00000174	aqp-6	373da78a-f2d9-427b-93b1-ffc9e80fb79a	0.44224	0.44224	0	0	1.54784	0.995041	0.5528	0	0.444444	0		-0.444444	apq-6 encodes an aquaporin whose expression in Xenopus oocytes Concise description: apq-6 encodes an aquaporin whose expression in Xenopus oocytes increases water permeability five- to seven-fold; AQP-6 is expressed in the cilia
C32D5.6	WBGene00016314	C32D5.6	391fb3f1-8a3c-4d95-a962-9da2d3ca8aa0	13.3999	0.837493	3.34997	9.21242	31.7086	0.837493	9.32022	21.5509	1	0.359431	0.427472	-0.640569	none available
C32D5.6	WBGene00016314	C32D5.6	C32D5.6.1	6.63361	0	2.65344	3.98016	31.7086	0.837493	9.32022	21.5509	0	0.284698	0.184686	0.284698	none available
C32E12.4	WBGene00016330	C32E12.4	87aaa25f-05c2-4488-af52-bf4215c5a949	1.32672	0	1.32672	0	14.5939	7.06005	2.46391	5.06997	0	0.538462	0	0.538462	none available
C32E8.7	WBGene00004368	ric-19	abfa1139-4013-481e-9f66-eaa519bcc5d8	14.1296	11.9558	1.08689	1.08689	56.1866	33.8636	17.449	4.87408	0.353058	0.0622896	0.222994	-0.290768	none available
C32E8.9	WBGene00016325	C32E8.9	922cfb9a-878d-4bcb-9ddd-cf0109f4b1c5	13.5989	4.85675	3.8854	4.85675	30.1829	12.6512	6.29008	11.2416	0.383895	0.617702	0.432034	0.233807	none available
C32E8.9	WBGene00016325	C32E8.9	8792cacb-ca84-460a-a17c-763a094194db	14.9256	6.96529	1.99008	5.97024	30.1829	12.6512	6.29008	11.2416	0.550562	0.316384	0.531085	-0.234178	none available
C32F10.2	WBGene00003020	lin-35	773050fe-3dd8-43d8-bce0-c235e891925c	18.5741	14.2878	0	4.28633	51.7421	36.3998	2.764	12.5783	0.392523	0	0.340771	-0.392523	lin-35 encodes the C. elegans retinoblastoma protein (Rb) ortholog; Concise description: lin-35 encodes the C. elegans retinoblastoma protein (Rb) ortholog; lin-35 was first identified in screens for synthetic multivulva (synMuv) genes and as a class B synMuv gene, functions redundantly with class A genes to antagonize Ras signaling and negatively regulate vulval development; in addition, loss of…
C32F10.2	WBGene00003020	lin-35	d9c6dae0-183b-4548-a468-db405261b407	33.168	22.112	2.764	8.29201	51.7421	36.3998	2.764	12.5783	0.607477	1	0.659229	0.392523	lin-35 encodes the C. elegans retinoblastoma protein (Rb) ortholog; Concise description: lin-35 encodes the C. elegans retinoblastoma protein (Rb) ortholog; lin-35 was first identified in screens for synthetic multivulva (synMuv) genes and as a class B synMuv gene, functions redundantly with class A genes to antagonize Ras signaling and negatively regulate vulval development; in addition, loss of…
C32F10.5	WBGene00001973	hmg-3	34c47773-8929-436f-9836-c677d928f945	69.5202	7.34766	4.52164	57.6509	204.669	35.1392	10.5773	158.952	0.209101	0.427485	0.362693	0.218383	none available
C32H11.5	WBGene00007868	C32H11.5	C32H11.5.1	1.6584	0.829201	0	0.829201	3.64848	0.829201	0.829201	1.99008	1	0	0.416667	-1	none available
C32H11.5	WBGene00007868	C32H11.5	114e02df-8772-4a30-895d-4e9ba941f305	1.6584	0	0.829201	0.829201	3.64848	0.829201	0.829201	1.99008	0	1	0.416667	1	none available
C33A11.2	WBGene00007878	C33A11.2	42b77218-3b0d-4fb7-9467-d45e8de7f164	23.881	13.1345	5.97024	4.7762	54.3956	21.9517	18.353	14.0909	0.598338	0.325301	0.338956	-0.273037	none available
C33A11.2	WBGene00007878	C33A11.2	868dea17-b00c-42af-917b-8a3a1e6d1ad8	28.5245	8.31965	11.8852	8.31965	54.3956	21.9517	18.353	14.0909	0.378998	0.64759	0.590428	0.268593	none available
C33A12.7	WBGene00007886	ethe-1	90584976-6345-414a-994b-a002ee401354	29.022	11.3564	11.3564	6.30914	56.7173	17.6075	30.2832	8.82659	0.644977	0.375008	0.714788	-0.269969	none available
C33C12.3	WBGene00016335	gba-1	15766d35-170a-4580-b9d8-7ba35108e09a	2.84297	0.568595	2.27438	0	27.8611	1.33063	13.7949	12.7356	0.427312	0.164871	0	-0.26244	none available
C33C12.3	WBGene00016335	gba-1	c982efe9-2782-4460-943b-a09097650874	11.1445	0	4.28633	6.85813	27.8611	1.33063	13.7949	12.7356	0	0.310719	0.538499	0.310719	none available
C33C12.4	WBGene00016336	C33C12.4	87a253b3-a925-46f8-8b93-a5f94d14cd6c	6.63361	0	1.32672	5.30688	7.96033	1.32672	1.32672	5.30688	0	1	1	1	none available
C33C12.4	WBGene00016336	C33C12.4	23cf0308-eaaa-4851-ab58-825fca6e7cb8	1.32672	1.32672	0	0	7.96033	1.32672	1.32672	5.30688	1	0	0	-1	none available
C33C12.5	WBGene00016337	fbxb-38	2eb41896-941a-48a5-87a9-15b78088652e	14.9256	14.9256	0	0	26.2027	25.3735	0.829201	0	0.588235	0		-0.588235	This gene encodes a protein containing an F-box, a motif predicted Concise description: This gene encodes a protein containing an F-box, a motif predicted to mediate protein-protein interactions either with homologs of yeast Skp-1p or with other proteins; its encoded protein also contains a Pfam-B45 motif of presently
C33C12.5	WBGene00016337	fbxb-38	d764faff-5ba1-4246-aed5-03fa0cf428f5	5.63856	5.63856	0	0	26.2027	25.3735	0.829201	0	0.222222	0		-0.222222	This gene encodes a protein containing an F-box, a motif predicted Concise description: This gene encodes a protein containing an F-box, a motif predicted to mediate protein-protein interactions either with homologs of yeast Skp-1p or with other proteins; its encoded protein also contains a Pfam-B45 motif of presently
C33C12.5	WBGene00016337	fbxb-38	C33C12.5.1	4.9752	4.146	0.829201	0	26.2027	25.3735	0.829201	0	0.163399	1		0.836601	This gene encodes a protein containing an F-box, a motif predicted Concise description: This gene encodes a protein containing an F-box, a motif predicted to mediate protein-protein interactions either with homologs of yeast Skp-1p or with other proteins; its encoded protein also contains a Pfam-B45 motif of presently
C33D9.3	WBGene00007898	C33D9.3	C33D9.3b.2	5.28477	0.528477	3.17086	1.58543	15.9428	0.528477	9.74761	5.66668	1	0.325297	0.279781	-0.674703	none available
C33D9.3	WBGene00007898	C33D9.3	c03e3fa6-29a2-4de7-b5b9-00c1a7835747	4.62141	0	2.64081	1.9806	15.9428	0.528477	9.74761	5.66668	0	0.270918	0.349518	0.270918	none available
C33D9.3	WBGene00007898	C33D9.3	c9fc89aa-6930-454d-87ac-76e0f52a1d2c	5.50589	0	3.67059	1.8353	15.9428	0.528477	9.74761	5.66668	0	0.376564	0.323875	0.376564	none available
C33E10.2	WBGene00016346	fbxa-120	aa64e3cf-b1f0-4ffd-9b8e-d07ae416cf4a	1.6584	0.829201	0.829201	0	17.8002	13.9306	0.829201	3.0404	0.0595238	1	0	0.940476	This gene encodes a protein containing an F-box, a motif predicted Concise description: This gene encodes a protein containing an F-box, a motif predicted to mediate protein-protein interactions either with homologs of yeast Skp-1p or with other proteins; this gene's encoded protein also contains an FTH/DUF38 motif,
C33E10.2	WBGene00016346	fbxa-120	6ba915e3-562e-45cf-bfa3-543fad193126	14.0411	11.7009	0	2.34019	17.8002	13.9306	0.829201	3.0404	0.839947	0	0.769697	-0.839947	This gene encodes a protein containing an F-box, a motif predicted Concise description: This gene encodes a protein containing an F-box, a motif predicted to mediate protein-protein interactions either with homologs of yeast Skp-1p or with other proteins; this gene's encoded protein also contains an FTH/DUF38 motif,
C33F10.13	WBGene00016359	fbxb-88	bc6b5198-73f5-4eae-9120-42105ae2b80b	38.5855	36.6067	0.989371	0.989371	62.4664	58.7706	2.70649	0.989371	0.622875	0.365554	1	-0.257321	none available
C33F10.2	WBGene00016352	tbck-1	C33F10.2.1	2.65344	2.65344	0	0	29.1879	12.9531	7.89002	8.34471	0.204849	0	0	-0.204849	tbck-1 encodes a TBC (Tre-2/Bub2/Cdc16) domain-containing protein Concise description: tbck-1 encodes a TBC (Tre-2/Bub2/Cdc16) domain-containing protein
C33G3.6	WBGene00007906	C33G3.6	6fefbbad-4d04-4e47-9b2e-bb303a8a4710	20.043	12.6587	2.10979	5.27446	35.1581	21.6919	6.79223	6.67395	0.583568	0.310617	0.790306	-0.272951	none available
C33G3.6	WBGene00007906	C33G3.6	e6b8d251-af75-438c-9066-80193e1cf619	3.98016	1.32672	2.65344	0	35.1581	21.6919	6.79223	6.67395	0.061162	0.390658	0	0.329496	none available
C33G8.10	WBGene00016367	nhr-162	C33G8.10.1	1.32672	0	1.32672	0	5.30688	0.995041	4.31184	0	0	0.307692		0.307692	none available
C33G8.10	WBGene00016367	nhr-162	0ccfc3b1-e6f2-4abf-8f60-dcf8f6223188	3.98016	0.995041	2.98512	0	5.30688	0.995041	4.31184	0	1	0.692308		-0.307692	none available
C33G8.11	WBGene00003697	nhr-107	f2203c31-f46d-463e-84ab-c3178886f8aa	10.6138	3.98016	5.30688	1.32672	47.762	8.92521	27.6802	11.1565	0.445946	0.191721	0.118919	-0.254225	nhr-107 encodes a member of the nuclear hormone receptor family.
C33G8.11	WBGene00003697	nhr-107	C33G8.11.1	25.2077	2.29161	13.7497	9.16644	47.762	8.92521	27.6802	11.1565	0.256757	0.496732	0.821622	0.239975	nhr-107 encodes a member of the nuclear hormone receptor family.
C33G8.12	WBGene00016368	nhr-163	0560016a-1af6-4905-82be-f5573e827f9b	18.6847	9.96515	4.98257	3.73693	28.4139	18.5336	6.14346	3.73693	0.537681	0.811038	1	0.273356	none available
C33G8.9	WBGene00016366	nhr-140	C33G8.9.1	5.2516	1.96935	1.96935	1.3129	23.0076	8.5774	3.96347	10.4667	0.229598	0.496875	0.125436	0.267278	none available
C33G8.9	WBGene00016366	nhr-140	d126085b-75d0-4ed0-aac2-3593ab7ed4bd	3.52687	2.11612	0	1.41075	23.0076	8.5774	3.96347	10.4667	0.246709	0	0.134785	-0.246709	none available
C33H5.4	WBGene00002221	klp-10	C33H5.4	1.32672	1.32672	0	0	36.8165	1.95993	5.90994	28.9466	0.676923	0	0	-0.676923	none available
C33H5.4	WBGene00002221	klp-10	cc15e1d6-abde-4983-94e8-12ffc3289753	25.5394	0	4.64352	20.8959	36.8165	1.95993	5.90994	28.9466	0	0.785714	0.721875	0.785714	none available
C34B2.1	WBGene00016386	tag-272	a7688aab-b504-4cc6-b945-a62762b7bc54	3.09568	1.03189	2.06379	0	7.96033	3.68534	4.27499	0	0.28	0.482759		0.202759	none available
C34B2.9	WBGene00016394	C34B2.9	4dcd4338-f4d8-4ab3-a8ee-d106c892ffe8	3.98016	0	2.65344	1.32672	15.9207	7.62865	5.97024	2.32176	0	0.444444	0.571429	0.444444	none available
C34B7.1	WBGene00007911	C34B7.1	1e424d2e-a988-4bfa-a089-05aceb625300	1.32672	1.32672	0	0	6.63361	1.32672	2.43232	2.87456	1	0	0	-1	The C34B7.1 gene encodes a divergent MYST acetyltransferase Concise description: The C34B7.1 gene encodes a divergent MYST acetyltransferase that is (apparently) unique to Caenorhabditis; it has no well-characterized orthologs in the complete Drosophila or S. cerevisiae genomes, and no obvious orthologs in
C34B7.1	WBGene00007911	C34B7.1	cf6a3963-e699-46a4-9f3f-0d27f8c9bfb7	1.32672	0	1.32672	0	6.63361	1.32672	2.43232	2.87456	0	0.545455	0	0.545455	The C34B7.1 gene encodes a divergent MYST acetyltransferase Concise description: The C34B7.1 gene encodes a divergent MYST acetyltransferase that is (apparently) unique to Caenorhabditis; it has no well-characterized orthologs in the complete Drosophila or S. cerevisiae genomes, and no obvious orthologs in
C34B7.1	WBGene00007911	C34B7.1	6ba0d4f5-af32-43f8-a31d-93962ff0d4a8	3.3168	0	1.1056	2.2112	6.63361	1.32672	2.43232	2.87456	0	0.454545	0.769231	0.454545	The C34B7.1 gene encodes a divergent MYST acetyltransferase Concise description: The C34B7.1 gene encodes a divergent MYST acetyltransferase that is (apparently) unique to Caenorhabditis; it has no well-characterized orthologs in the complete Drosophila or S. cerevisiae genomes, and no obvious orthologs in
C34B7.4	WBGene00007914	mys-4	807b8dda-dd19-42a1-b5ee-460fc907ce4a	16.2523	8.80335	1.35436	6.09462	35.8215	20.9169	2.03214	12.8724	0.420873	0.66647	0.473463	0.245597	C34B7.4 encodes a MYST family histone acetyltransferase; based Concise description: C34B7.4 encodes a MYST family histone acetyltransferase; based upon sequence similarity, the product of C34B7.4 is predicted to be the enzymatic component of an NuA4-like histone acetyltransferase (HAT) complex that functions in transcriptional activation; C34B7.4 is likely required for regulating gene expression …
C34C6.7	WBGene00007919	cup-16	660ee43f-3b07-481b-838a-d04fe2692ff0	20.7411	3.19093	15.9547	1.59547	90.0401	6.55876	77.2798	6.20157	0.486515	0.206453	0.257268	-0.280061	none available
C34D1.3	WBGene00003850	odr-3	eb0fbcf4-928d-4749-a9cc-f16bac407ce9	10.3926	0.944786	6.6135	2.83436	13.4883	2.27151	6.6135	4.60332	0.415929	1	0.615721	0.584071	odr-3 encodes a G protein alpha subunit; odr-3 activity is Concise description: odr-3 encodes a G protein alpha subunit; odr-3 activity is required for normal chemotaxis, odorant avoidance, and nociceptive function as well as cilium morphogenesis in chemosensory neurons; an ODR-3::GFP is expressed in five pairs of sensory neurons AWA, AWB, AWC, ASH, and ADF; the AWC neurons consistently express G…
C34D1.3	WBGene00003850	odr-3	dbc2e3c5-7771-4c86-b2aa-494f18328e55	2.65344	1.32672	0	1.32672	13.4883	2.27151	6.6135	4.60332	0.584071	0	0.28821	-0.584071	odr-3 encodes a G protein alpha subunit; odr-3 activity is Concise description: odr-3 encodes a G protein alpha subunit; odr-3 activity is required for normal chemotaxis, odorant avoidance, and nociceptive function as well as cilium morphogenesis in chemosensory neurons; an ODR-3::GFP is expressed in five pairs of sensory neurons AWA, AWB, AWC, ASH, and ADF; the AWC neurons consistently express G…
C34E11.2	WBGene00007935	C34E11.2	99d358de-bcfc-4401-b7e8-0eabb1fb2609	2.84297	1.89532	0.947658	0	3.79063	1.89532	1.89532	0	1	0.5		-0.5	none available
C34F6.1	WBGene00007938	C34F6.1	756f6e9f-56ae-4e92-937d-7b1f6b075254	3.18413	0.796033	1.59207	0.796033	10.0831	4.56982	3.89171	1.62155	0.174194	0.409091	0.490909	0.234897	none available
C34F6.4	WBGene00002029	hst-2	958f1ba8-78ee-4c10-a399-5687710907ff	9.28705	6.19136	3.09568	0	83.5834	51.7174	8.23356	23.6324	0.119715	0.375984	0	0.256268	hst-2 encodes the C. elegans ortholog of the heparan sulfate Concise description: hst-2 encodes the C. elegans ortholog of the heparan sulfate modifying enzyme 2O-sulfotransferase; by homology, HST-2 is predicted to function in heparan sulfate biosynthesis by catalyzing the chain-modifying sulfation of the C2 hydroxyl group of hexuronic acid; during development, hst-2 activity is required for nor…
C34F6.7	WBGene00007941	C34F6.7	4451b1ee-d1eb-4221-93fb-d9242f22c5a7	25.5504	10.646	8.51681	6.38761	43.1184	17.876	10.0799	15.1626	0.595548	0.844934	0.421275	0.249386	none available
C34H3.2	WBGene00003846	odd-2	C34H3.2.1	8.26989	3.81687	4.45302	0	15.6111	8.41028	6.29864	0.90217	0.453835	0.706982	0	0.253147	odd-2 encodes a protein with homology to the Drosophila ODD-SKIPPED Concise description: odd-2 encodes a protein with homology to the Drosophila ODD-SKIPPED
C34H4.4	WBGene00000681	col-107	C34H4.4.1	205.751	49.3045	143.173	13.2743	320.592	60.782	237.628	22.1815	0.811169	0.602507	0.598439	-0.208662	none available
C34H4.5	WBGene00016427	C34H4.5	ef62f924-3ab7-4712-81f6-8f9169584028	6.15978	2.05326	1.02663	3.07989	7.96033	2.05326	2.40073	3.50633	1	0.427632	0.878378	-0.572368	none available
C35A11.1	WBGene00016428	dmsr-7	C35A11.1.1	7.96033	3.18413	4.7762	0	11.9405	5.83757	6.10292	0	0.545455	0.782609		0.237154	none available
C35A11.1	WBGene00016428	dmsr-7	98961a7b-adf1-47ba-a237-147a769cdff1	3.98016	2.65344	1.32672	0	11.9405	5.83757	6.10292	0	0.454545	0.217391		-0.237154	none available
C35A11.2	WBGene00016429	C35A11.2	182f3a66-4101-4595-854e-b755740df7c0	3.98016	3.98016	0	0	26.5344	17.2965	8.10774	1.13017	0.230114	0	0	-0.230114	none available
C35A5.10	WBGene00044016	C35A5.10	7ea31347-b3db-4d8a-896a-61f9cbb50118	12.2722	10.3841	1.88803	0	18.5741	13.7194	4.85472	0	0.756896	0.388905		-0.367991	none available
C35A5.7	WBGene00007951	dmsr-8	88821a11-be8a-40c2-aa9c-c68c0807820e	0.663361	0.663361	0	0	5.04154	1.19405	2.65344	1.19405	0.555556	0	0	-0.555556	none available
C35A5.7	WBGene00007951	dmsr-8	9244d35c-d52b-4d7d-ac8d-c78ef8643c21	1.59207	0.530688	0.530688	0.530688	5.04154	1.19405	2.65344	1.19405	0.444444	0.2	0.444444	-0.244444	none available
C35A5.7	WBGene00007951	dmsr-8	0575921f-0aef-4abe-a9fc-6c78968a4ed4	1.59207	0	1.59207	0	5.04154	1.19405	2.65344	1.19405	0	0.6	0	0.6	none available
C35B1.7	WBGene00016436	C35B1.7	68f76b94-8c50-4cff-91c4-f2a539cf2477	9.28705	1.16088	6.96529	1.16088	10.6138	1.82424	6.96529	1.82424	0.636364	1	0.636364	0.363636	none available
C35B1.7	WBGene00016436	C35B1.7	25b0eca7-edb9-4864-b00a-f025f82df047	1.32672	0.663361	0	0.663361	10.6138	1.82424	6.96529	1.82424	0.363636	0	0.363636	-0.363636	none available
C35C5.8	WBGene00007957	C35C5.8	f59fe217-586f-413d-8cc0-9c7e55d2253e	235.377	0	223.542	11.8346	382.494	0.294648	370.156	12.0437	0	0.603914	0.98264	0.603914	none available
C35C5.8	WBGene00007957	C35C5.8	eb578326-6ddd-4917-84ad-178148646eac	5.45725	0.143612	5.31364	0	382.494	0.294648	370.156	12.0437	0.487402	0.0143551	0	-0.473047	none available
C35C5.8	WBGene00007957	C35C5.8	b0d92de2-8df3-44ab-a3cc-6a0d7a6ef50b	5.13521	0.151036	4.98418	0	382.494	0.294648	370.156	12.0437	0.512598	0.0134651	0	-0.499133	none available
C35C5.9	WBGene00007958	C35C5.9	e73116b1-4896-45f2-8916-da4da8b74490	27.8296	1.42716	19.9802	6.4222	87.4846	2.70558	62.252	22.527	0.527485	0.320956	0.285089	-0.206529	none available
C35D10.12	WBGene00016448	C35D10.12	bb432151-ccb8-4a24-8f12-34869a8833c5	2.32176	2.32176	0	0	8.29201	5.19632	3.09568	0	0.446809	0		-0.446809	none available
C35D10.12	WBGene00016448	C35D10.12	dcf9dff5-f2d9-40c6-86e6-535a2dd4399a	2.32176	0.773921	1.54784	0	8.29201	5.19632	3.09568	0	0.148936	0.5		0.351064	none available
C35D10.12	WBGene00016448	C35D10.12	d913181c-ab88-424f-9e7f-fdec1a8161c5	2.32176	0.773921	1.54784	0	8.29201	5.19632	3.09568	0	0.148936	0.5		0.351064	none available
C35D10.14	WBGene00016450	clec-5	C35D10.14.1	8.18145	1.16878	1.75317	5.2595	24.9866	2.93774	11.4825	10.5664	0.397849	0.152682	0.497758	-0.245167	none available
C35D10.14	WBGene00016450	clec-5	0d597849-33a2-4203-bc0c-6ea49843a5a0	16.8051	1.76896	9.72929	5.30688	24.9866	2.93774	11.4825	10.5664	0.602151	0.847318	0.502242	0.245167	none available
C35D10.2	WBGene00016440	gipc-1	c2608954-a3a5-4e20-8bbd-16da7c249dfb	222.845	0	23.9987	198.846	309.391	0.262975	36.2378	272.891	0	0.662256	0.728666	0.662256	none available
C35D10.2	WBGene00016440	gipc-1	46ed440d-c302-4835-aa47-62e84db3c64b	7.3633	0.262975	1.31488	5.78545	309.391	0.262975	36.2378	272.891	1	0.0362847	0.0212006	-0.963715	none available
C35E7.1	WBGene00016453	vet-2	6d420cce-6980-4300-b21d-5645040f33c4	127.488	126.655	0.833258	0	226.746	225.127	0.833258	0.786211	0.562595	1	0	0.437405	none available
C35E7.10	WBGene00016462	C35E7.10	C35E7.10a.1	25.2077	0	2.65344	22.5543	38.4749	3.98016	3.98016	30.5146	0	0.666667	0.73913	0.666667	none available
C35E7.10	WBGene00016462	C35E7.10	44ee0d6b-436c-4266-9a0c-e62f54c4a343	5.30688	0	1.32672	3.98016	38.4749	3.98016	3.98016	30.5146	0	0.333333	0.130435	0.333333	none available
C35E7.10	WBGene00016462	C35E7.10	C35E7.10b.1	7.96033	3.98016	0	3.98016	38.4749	3.98016	3.98016	30.5146	1	0	0.130435	-1	none available
C35E7.11	WBGene00016463	C35E7.11	4c7780bf-bd05-4b75-a026-2f0aade4b118	27.8049	12.2341	13.3463	2.22439	50.2948	26.8677	18.9633	4.46382	0.455348	0.703798	0.498315	0.248451	none available
C36A4.12	WBGene00164983	C36A4.12	c9fa5e86-0694-4fb9-8793-7e7331df236a	3.3168	2.2112	1.1056	0	3.98016	2.2112	1.76896	0	1	0.625		-0.375	none available
C36A4.12	WBGene00164983	C36A4.12	e27b3bc3-0215-45a5-a053-e7f0e40326cb	0.663361	0	0.663361	0	3.98016	2.2112	1.76896	0	0	0.375		0.375	none available
C36A4.3	WBGene00014697	cyp-25A3	C36A4.3.1	5.30688	1.32672	1.99008	1.99008	37.8286	16.293	5.9996	15.5359	0.0814288	0.331702	0.128095	0.250274	none available
C36B1.14	WBGene00044614	C36B1.14	C36B1.14.1	78.9399	42.1459	6.68982	30.1042	119.958	65.2276	18.3213	36.4087	0.646135	0.365139	0.82684	-0.280997	none available
C36B1.8	WBGene00007975	gls-1	1cb2461e-8bf2-457e-a7a7-2f351697856b	4.87728	1.46318	0.487728	2.92637	61.0292	37.8998	1.53773	21.5917	0.0386067	0.317174	0.135532	0.278568	none available
C36B1.8	WBGene00007975	gls-1	02b599d0-1da9-49ac-8c49-daf0ad5d57d9	4.87728	1.77356	0.443389	2.66033	61.0292	37.8998	1.53773	21.5917	0.046796	0.28834	0.123211	0.241544	none available
C36B7.3	WBGene00016466	C36B7.3	3656478e-4487-4bd5-942e-fbb5622acd4f	1.32672	1.32672	0	0	2.65344	1.32672	1.32672	0	1	0		-1	none available
C36B7.3	WBGene00016466	C36B7.3	f18926dd-72da-474f-8e77-bfbbd5d74173	1.32672	0	1.32672	0	2.65344	1.32672	1.32672	0	0	1		1	none available
C36C9.1	WBGene00016485	meg-4	4b943b75-29a9-459b-89ba-999a65a2f4e7	19.2375	13.0815	0	6.15599	45.7719	27.6754	1.99008	16.1064	0.472675	0	0.382208	-0.472675	none available
C36C9.1	WBGene00016485	meg-4	72f21461-f93e-42f7-a481-b334c2bd89bf	14.5939	7.96033	1.32672	5.30688	45.7719	27.6754	1.99008	16.1064	0.287632	0.666667	0.329489	0.379035	none available
C36E8.3	WBGene00007982	pxd-1	4fd014e0-6bcf-4013-9d94-9d6e9a12a24e	44.2683	31.9715	9.01761	3.27913	225.277	74.7933	98.1607	52.3232	0.427465	0.0918657	0.0626707	-0.335599	none available
C36F7.4	WBGene00004372	rig-5	fad98dd7-84ee-45af-9b8f-db73a9adaf61	5.91654	5.91654	0	0	21.2275	20.4036	0.823936	0	0.289975	0		-0.289975	none available
C36F7.4	WBGene00004372	rig-5	0e879502-ce02-4675-9699-6525922d203c	4.94362	4.11968	0.823936	0	21.2275	20.4036	0.823936	0	0.201909	1		0.798091	none available
C37A2.2	WBGene00004110	pqn-20	0a7e818c-f362-480b-ac9d-96c9bafa21e5	5.30688	1.76896	3.53792	0	28.3034	15.3752	6.35499	6.57317	0.115053	0.556715	0	0.441663	The protein product of this gene is predicted to contain a Concise description: The protein product of this gene is predicted to contain a glutamine/asparagine (Q/N)-rich ('prion') domain, by the algorithm of Michelitsch
C37A2.2	WBGene00004110	pqn-20	bf12bbfb-86dc-4b71-b024-23f6051d6e1d	11.4982	6.70731	1.43728	3.35366	28.3034	15.3752	6.35499	6.57317	0.436242	0.226166	0.510204	-0.210076	The protein product of this gene is predicted to contain a Concise description: The protein product of this gene is predicted to contain a glutamine/asparagine (Q/N)-rich ('prion') domain, by the algorithm of Michelitsch
C37A2.2	WBGene00004110	pqn-20	e5bba2e0-1602-421a-b286-b877401e82bc	11.4982	6.89895	1.37979	3.21951	28.3034	15.3752	6.35499	6.57317	0.448706	0.217119	0.489796	-0.231587	The protein product of this gene is predicted to contain a Concise description: The protein product of this gene is predicted to contain a glutamine/asparagine (Q/N)-rich ('prion') domain, by the algorithm of Michelitsch
C37A2.4	WBGene00000871	cye-1	66162b0a-2d58-44f6-8d90-14e34e45227f	21.8909	5.10788	0	16.783	49.0887	13.0758	1.1056	34.9072	0.390635	0	0.480789	-0.390635	cye-1 encodes the sole C. elegans E-type cyclin; CYE-1 is required Concise description: cye-1 encodes the sole C. elegans E-type cyclin; CYE-1 is required for progression through the mitotic cell cycle during embryonic, larval, and germline development; cye-1 is also required for endoreduplication in intestinal cells; CYE-1 is expressed ubiquitously in nuclei during embryonic development and post…
C37A2.4	WBGene00000871	cye-1	6b0af3cb-de9d-4c09-bad5-7b3711901bbb	20.5642	3.54555	0	17.0186	49.0887	13.0758	1.1056	34.9072	0.271153	0	0.487538	-0.271153	cye-1 encodes the sole C. elegans E-type cyclin; CYE-1 is required Concise description: cye-1 encodes the sole C. elegans E-type cyclin; CYE-1 is required for progression through the mitotic cell cycle during embryonic, larval, and germline development; cye-1 is also required for endoreduplication in intestinal cells; CYE-1 is expressed ubiquitously in nuclei during embryonic development and post…
C37A2.4	WBGene00000871	cye-1	3d80c6c1-6bd4-40e3-ba06-52c573ae7f52	3.3168	1.1056	1.1056	1.1056	49.0887	13.0758	1.1056	34.9072	0.084553	1	0.0316725	0.915447	cye-1 encodes the sole C. elegans E-type cyclin; CYE-1 is required Concise description: cye-1 encodes the sole C. elegans E-type cyclin; CYE-1 is required for progression through the mitotic cell cycle during embryonic, larval, and germline development; cye-1 is also required for endoreduplication in intestinal cells; CYE-1 is expressed ubiquitously in nuclei during embryonic development and post…
C37A2.4	WBGene00000871	cye-1	457a0246-4936-4af9-8ad5-c3f84ae05398	3.3168	3.3168	0	0	49.0887	13.0758	1.1056	34.9072	0.253659	0	0	-0.253659	cye-1 encodes the sole C. elegans E-type cyclin; CYE-1 is required Concise description: cye-1 encodes the sole C. elegans E-type cyclin; CYE-1 is required for progression through the mitotic cell cycle during embryonic, larval, and germline development; cye-1 is also required for endoreduplication in intestinal cells; CYE-1 is expressed ubiquitously in nuclei during embryonic development and post…
C37A2.6	WBGene00016492	C37A2.6	C37A2.6.1	3.98016	1.99008	0.663361	1.32672	19.9008	8.29201	1.49256	10.1162	0.24	0.444444	0.131148	0.204444	none available
C37E2.4	WBGene00000457	ceh-36	a49a920d-d690-4e0d-bcf3-8aeee4c6fe57	14.0411	10.5308	3.51028	0	21.117	17.2197	3.89724	0	0.611557	0.900709		0.289152	ceh-36 encodes a paired-like homeodomain transcription factor Concise description: ceh-36 encodes a paired-like homeodomain transcription factor that is one of three orthodenticle (OTX/OTD) homeodomain proteins in C. elegans (the others being TTX-1 and CEH-37); CEH-36 is required broadly for specification of the AWC olfactory neuron and also for establishing the left-right asymmetry of the ASEL a…
C37H5.2	WBGene00016506	abhd-5.1	00878939-8de1-43cd-9785-98ca5fdd069f	7.96033	0	5.97024	1.99008	38.4749	2.43232	21.1833	14.8593	0	0.281837	0.133929	0.281837	none available
C37H5.2	WBGene00016506	abhd-5.1	2f593bdd-1ff9-490e-ac5c-d4ae695ed766	14.5939	0	7.29697	7.29697	38.4749	2.43232	21.1833	14.8593	0	0.344468	0.491071	0.344468	none available
C37H5.2	WBGene00016506	abhd-5.1	752ea3cb-8b75-4a99-9cc4-a9e0764d26aa	1.32672	1.32672	0	0	38.4749	2.43232	21.1833	14.8593	0.545455	0	0	-0.545455	none available
C37H5.9	WBGene00003528	nas-9	4c31c130-059c-42dd-9d9f-640f3cddd594	19.0384	0	7.25274	11.7857	83.0527	1.37632	32.4085	49.2679	0	0.223791	0.239217	0.223791	nas-9 encodes an astacin-like metalloprotease; loss of nas-9 Concise description: nas-9 encodes an astacin-like metalloprotease; loss of nas-9 activity via RNAi results in low levels (6%) of embryonic lethality; a nas-9::GFP
C38C10.4	WBGene00001689	gpr-2	c6c1f402-61f4-4bd9-8bac-b9a2aac171f1	101.925	40.5245	7.3681	54.0327	120.566	52.66	7.3681	60.5377	0.769551	1	0.892547	0.230449	gpr-2 encodes a protein containing a GPR (G Protein Regulator)/GoLoco Concise description: gpr-2 encodes a protein containing a GPR (G Protein Regulator)/GoLoco motif characteristic of guanine nucleotide exchange factors specific for G-alpha GTPases; GPR-2 appears to function redundantly during early embryogenesis and germ-line development to regulate chromosome and spindle movements during cell …
C38C3.3	WBGene00016512	C38C3.3	59d37e1f-a694-42ce-b966-8bbfaf7dff26	8.84481	1.1056	4.4224	3.3168	47.762	1.1056	13.9121	32.7442	1	0.317881	0.101294	-0.682119	none available
C38C3.3	WBGene00016512	C38C3.3	5f6fb6ea-b729-4e94-9cc9-ee3c39772245	22.3331	0	5.58328	16.7499	47.762	1.1056	13.9121	32.7442	0	0.401325	0.511536	0.401325	none available
C38C3.3	WBGene00016512	C38C3.3	d29913e8-a975-48a0-8dfe-56cd5541e020	11.7194	0	3.90646	7.81291	47.762	1.1056	13.9121	32.7442	0	0.280795	0.238604	0.280795	none available
C38C3.6	WBGene00016514	C38C3.6	880378e3-9bcc-4f74-b614-0d13fc4b81af	3.3168	2.2112	1.1056	0	9.28705	3.53792	5.74912	0	0.625	0.192308		-0.432692	none available
C38C3.6	WBGene00016514	C38C3.6	7d1868a7-59b6-4168-8cd5-f6f779bd2498	2.65344	0	2.65344	0	9.28705	3.53792	5.74912	0	0	0.461538		0.461538	none available
C38C6.3	WBGene00007996	C38C6.3	C38C6.3.1	1.99008	1.99008	0	0	7.29697	6.19136	1.1056	0	0.321429	0		-0.321429	none available
C38C6.3	WBGene00007996	C38C6.3	51d85b86-4ea7-4a77-8c1c-85e0e56153da	1.32672	1.32672	0	0	7.29697	6.19136	1.1056	0	0.214286	0		-0.214286	none available
C38C6.3	WBGene00007996	C38C6.3	ed2550f4-8fc4-45c5-b4ad-18de9f24f038	3.3168	2.2112	1.1056	0	7.29697	6.19136	1.1056	0	0.357143	1		0.642857	none available
C39B10.6	WBGene00001252	elt-4	2573d86f-3166-4a4e-a6b4-bccc03b9746f	2.43232	0	0.810774	1.62155	8.18145	2.13749	3.61163	2.43232	0	0.22449	0.666667	0.22449	elt-4 encodes an unusually small (74-residue) GATA factor, Concise description: elt-4 encodes an unusually small (74-residue) GATA factor,
C39B5.2	WBGene00016520	C39B5.2	90291d30-ed66-445f-aaff-d18afd6fa75e	200.651	166.08	23.7257	10.846	412.388	299.002	82.7281	30.6584	0.555447	0.286791	0.35377	-0.268656	none available
C39D10.11	WBGene00043983	C39D10.11	C39D10.11a.1	2.65344	1.32672	0.663361	0.663361	20.0851	2.65344	10.8691	6.56253	0.5	0.0610317	0.101083	-0.438968	none available
C39D10.11	WBGene00043983	C39D10.11	21e3d4d9-8e67-4a62-af32-854704a69cd2	4.31184	0	4.31184	0	20.0851	2.65344	10.8691	6.56253	0	0.396706	0	0.396706	none available
C39D10.11	WBGene00043983	C39D10.11	b2538406-94a1-4068-a692-70f906bfeec5	2.65344	1.32672	1.32672	0	20.0851	2.65344	10.8691	6.56253	0.5	0.122063	0	-0.377937	none available
C39D10.2	WBGene00016530	C39D10.2	13df472d-6c8f-4a8a-9688-f897959b3e7f	53.8206	3.36379	44.8505	5.60632	84.9101	9.88147	65.4777	9.55097	0.340414	0.684974	0.58699	0.34456	none available
C39D10.3	WBGene00016531	pcyt-2.2	C39D10.3a.1	14.5939	6.63361	1.32672	6.63361	34.1631	11.9958	9.42525	12.742	0.552995	0.140762	0.520607	-0.412233	none available
C39D10.6	WBGene00016533	C39D10.6	f2539825-8492-42e5-ab88-43ee34c77f05	5.74912	1.91637	3.83275	0	16.1418	6.64282	7.23247	2.26648	0.288488	0.529936	0	0.241448	none available
C39E9.3	WBGene00000705	col-131	d21a81dd-95bd-4c6c-8728-8f1ca172284d	9.06593	8.31043	0.755494	0	16.8051	13.3851	3.41999	0	0.62087	0.220905		-0.399965	none available
C39E9.3	WBGene00000705	col-131	059612bf-7f91-4b2e-8406-254002d6917d	4.86464	2.91879	1.94586	0	16.8051	13.3851	3.41999	0	0.218062	0.568966		0.350904	none available
C39E9.4	WBGene00008028	scl-6	3f7b5441-b844-4046-b74d-5e18ad543e67	1.32672	1.32672	0	0	14.5939	1.32672	1.2438	12.0234	1	0	0	-1	scl-6 encodes a predicted extracellular protein that is a member Concise description: scl-6 encodes a predicted extracellular protein that is a member
C39E9.4	WBGene00008028	scl-6	cba099d1-1ec9-44a3-8d41-5201946c0e82	9.95041	0	1.2438	8.70661	14.5939	1.32672	1.2438	12.0234	0	1	0.724138	1	scl-6 encodes a predicted extracellular protein that is a member Concise description: scl-6 encodes a predicted extracellular protein that is a member
C39F7.5	WBGene00016540	C39F7.5	994caa3f-388e-4345-b39a-08b66af92baa	14.417	4.43601	7.76302	2.21801	36.6617	12.7612	12.4508	11.1844	0.347617	0.623497	0.198312	0.27588	none available
C39F7.5	WBGene00016540	C39F7.5	b5dcf1d4-9d63-4c11-b3f8-243926976a15	4.02439	3.01829	0	1.0061	36.6617	12.7612	12.4508	11.1844	0.236521	0	0.0899551	-0.236521	none available
C39H7.4	WBGene00016542	C39H7.4	c24c7d4f-6e70-4363-80ac-01bf9dd73280	48.0273	16.0091	22.6796	9.33864	72.9697	16.9986	42.4842	13.4869	0.941789	0.533835	0.692425	-0.407953	none available
C40A11.10	WBGene00016553	mir-8199	b88be214-b08a-4010-b480-746db847c1e8	20.0114	20.0114	0	0	48.6464	47.3112	1.33523	0	0.422973	0		-0.422973	none available
C40A11.10	WBGene00016553	mir-8199	9b0a9c69-f920-4e49-b3d9-7704d01022a8	8.73425	8.06238	0.671865	0	48.6464	47.3112	1.33523	0	0.170412	0.503185		0.332773	none available
C40A11.10	WBGene00016553	mir-8199	6d075b1c-b681-4f66-94ff-d1d34dfcc0ba	1.32672	0.663361	0.663361	0	48.6464	47.3112	1.33523	0	0.0140212	0.496815		0.482794	none available
C40A11.10	WBGene00016553	mir-8199	0f689d46-17f0-4eb4-a558-03b458e7fa76	13.9306	13.9306	0	0	48.6464	47.3112	1.33523	0	0.294445	0		-0.294445	none available
C40A11.4	WBGene00016547	C40A11.4	1c3e38ba-ac3c-42c4-b58a-02dea55822a9	73.0802	73.0802	0	0	146.934	146.093	0.841218	0	0.50023	0		-0.50023	none available
C40A11.4	WBGene00016547	C40A11.4	0ee40d3b-0579-4f83-b628-183a30a84976	54.5061	54.5061	0	0	146.934	146.093	0.841218	0	0.373092	0		-0.373092	none available
C40A11.4	WBGene00016547	C40A11.4	9874132c-2cd8-45a8-af3d-612bec05fc36	19.348	18.5068	0.841218	0	146.934	146.093	0.841218	0	0.126678	1		0.873322	none available
C40D2.3	WBGene00016556	math-21	C40D2.3.1	1.99008	0.663361	1.32672	0	3.3168	0.663361	2.65344	0	1	0.5		-0.5	none available
C40D2.3	WBGene00016556	math-21	8c0c073a-b522-4b57-86cf-45fadd10f8c8	1.32672	0	1.32672	0	3.3168	0.663361	2.65344	0	0	0.5		0.5	none available
C40H1.7	WBGene00008042	C40H1.7	b94f521f-f2d9-4edd-9ea4-bb10c35a2cd0	1.32672	0	1.32672	0	17.2474	1.60312	5.08576	10.5585	0	0.26087	0	0.26087	none available
C40H1.7	WBGene00008042	C40H1.7	2ffc5fa0-27f8-4ee9-a467-0ee46c524dc0	0.663361	0.663361	0	0	17.2474	1.60312	5.08576	10.5585	0.413793	0	0	-0.413793	none available
C40H5.4	WBGene00008047	lact-7	C40H5.4.1	1.32672	0	1.32672	0	3.98016	1.32672	2.65344	0	0	0.5		0.5	lact-7 encodes a beta-lactamase domain-containing protein.
C40H5.4	WBGene00008047	lact-7	ffbff3bb-a837-4ad4-bd99-5961a489b28d	1.32672	0	1.32672	0	3.98016	1.32672	2.65344	0	0	0.5		0.5	lact-7 encodes a beta-lactamase domain-containing protein.
C40H5.4	WBGene00008047	lact-7	c2efc976-df26-4f7b-8ad0-f29a274451c8	1.32672	1.32672	0	0	3.98016	1.32672	2.65344	0	1	0		-1	lact-7 encodes a beta-lactamase domain-containing protein.
C40H5.5	WBGene00006654	ttx-3	C40H5.5b.1	5.30688	3.98016	1.32672	0	6.63361	3.98016	2.65344	0	1	0.5		-0.5	ttx-3 encodes a LIM homeodomain protein required for functions Concise description: ttx-3 encodes a LIM homeodomain protein required for functions
C40H5.5	WBGene00006654	ttx-3	a494283a-18c8-4ee4-b29b-b515d122d597	1.32672	0	1.32672	0	6.63361	3.98016	2.65344	0	0	0.5		0.5	ttx-3 encodes a LIM homeodomain protein required for functions Concise description: ttx-3 encodes a LIM homeodomain protein required for functions
C41A3.2	WBGene00016559	C41A3.2	6ef04cdc-2458-439f-838e-07eb90eab1d6	4.13495	0.689158	0	3.44579	9.28705	0.689158	1.32672	7.27117	1	0	0.473898	-1	none available
C41A3.2	WBGene00016559	C41A3.2	bfd32ac2-6e77-454a-9065-5cf74c7b5fc2	1.32672	0	1.32672	0	9.28705	0.689158	1.32672	7.27117	0	1	0	1	none available
C41C4.5	WBGene00006832	unc-105	2e84e59a-2fd4-4c38-be45-61bbdb5602e4	4.64352	1.99008	1.99008	0.663361	13.9306	10.3926	1.99008	1.54784	0.191489	1	0.428571	0.808511	unc-105 encodes a muscle degenerin, a mechanosensory membrane Concise description: unc-105 encodes a muscle degenerin, a mechanosensory membrane channel that is a member of the degenerin ion channel superfamily and similar to subunits of the mammalian amiloride-sensitive epithelial sodium channel (ENaC, OMIM:600761); UNC-105 is required for normal growth and for normal contraction and organizatio…
C41C4.5	WBGene00006832	unc-105	C41C4.5d.2	3.98016	3.98016	0	0	13.9306	10.3926	1.99008	1.54784	0.382979	0	0	-0.382979	unc-105 encodes a muscle degenerin, a mechanosensory membrane Concise description: unc-105 encodes a muscle degenerin, a mechanosensory membrane channel that is a member of the degenerin ion channel superfamily and similar to subunits of the mammalian amiloride-sensitive epithelial sodium channel (ENaC, OMIM:600761); UNC-105 is required for normal growth and for normal contraction and organizatio…
C41C4.5	WBGene00006832	unc-105	0e5c64af-083c-41d5-8b7d-7d73e5a38aec	2.65344	2.65344	0	0	13.9306	10.3926	1.99008	1.54784	0.255319	0	0	-0.255319	unc-105 encodes a muscle degenerin, a mechanosensory membrane Concise description: unc-105 encodes a muscle degenerin, a mechanosensory membrane channel that is a member of the degenerin ion channel superfamily and similar to subunits of the mammalian amiloride-sensitive epithelial sodium channel (ENaC, OMIM:600761); UNC-105 is required for normal growth and for normal contraction and organizatio…
C41G11.1	WBGene00016568	C41G11.1	311c0cc4-a32c-4eab-bc2d-c8e1f1ce4181	3.81064	1.27021	0.635106	1.90532	65.1789	5.16202	25.5496	34.4672	0.246069	0.0248578	0.0552791	-0.221211	none available
C41G11.3	WBGene00004349	rgs-6	6758a7dd-18bc-4741-9475-d971b0e0f860	9.01065	1.00118	7.00828	1.00118	38.4749	13.2204	23.3758	1.87875	0.0757303	0.299809	0.532897	0.224079	rgs-6 encodes a regulator of G protein signaling; by homology, Concise description: rgs-6 encodes a regulator of G protein signaling; by homology, RGS-6 is predicted to function as a GTPase-activating protein that binds G protein alpha subunits and negatively regulates heterotrimeric G protein signaling; loss of rgs-6 activity via RNAi or a deletion mutation results in no obvious defects, and lik…
C41G7.3	WBGene00008061	C41G7.3	edfda4cd-ec19-41d1-ae84-0843b023e8c6	56.5674	9.30856	2.14813	45.1107	135.905	26.6548	3.56271	105.687	0.349226	0.602948	0.426833	0.253721	none available
C41G7.4	WBGene00008062	set-32	C41G7.4.1	5.97024	2.65344	1.32672	1.99008	33.168	20.9759	3.55898	8.63316	0.1265	0.372781	0.230516	0.246281	set-32 encodes a divergent histone H3 lysine-9 (H3K9) methyltransferase Concise description: set-32 encodes a divergent histone H3 lysine-9 (H3K9) methyltransferase homolog with a SET domain; SET-32 has no obvious non-nematode orthologs, but several paralogs (SET-6, SET-13, SET-15, SET-19, SET-20, and SET-21); set-32(ok1457) has
C41H7.5	WBGene00016575	C41H7.5	1d20e072-c6fd-4400-b5ae-704470af899e	15.1467	0	14.0648	1.08191	34.2736	8.17826	23.505	2.59042	0	0.598377	0.417658	0.598377	none available
C41H7.5	WBGene00016575	C41H7.5	8012be6c-bd54-4299-b4fc-dad6d3837076	11.1666	4.29483	6.01277	0.858967	34.2736	8.17826	23.505	2.59042	0.525153	0.255809	0.331594	-0.269344	none available
C42C1.1	WBGene00016579	sre-14	7b52748e-f27f-47d8-89b9-36c0708d432c	1.32672	1.32672	0	0	3.98016	2.65344	1.32672	0	0.5	0		-0.5	none available
C42C1.1	WBGene00016579	sre-14	881ccf66-b466-40d8-b3a7-f165291083fd	1.32672	0	1.32672	0	3.98016	2.65344	1.32672	0	0	1		1	none available
C42C1.1	WBGene00016579	sre-14	C42C1.1.1	1.32672	1.32672	0	0	3.98016	2.65344	1.32672	0	0.5	0		-0.5	none available
C42C1.9	WBGene00016587	C42C1.9	edc3aac2-a1c7-488f-96af-888647ed47ae	30.5146	0	3.98016	26.5344	46.4352	2.87456	5.30688	37.5904	0	0.75	0.705882	0.75	none available
C42C1.9	WBGene00016587	C42C1.9	3d3b9403-73a2-49d7-963e-cadaf394603e	5.30688	0	1.32672	3.98016	46.4352	2.87456	5.30688	37.5904	0	0.25	0.105882	0.25	none available
C42C1.9	WBGene00016587	C42C1.9	8d23e046-e186-4ba9-b418-69c170b3adf2	8.62369	2.87456	0	5.74912	46.4352	2.87456	5.30688	37.5904	1	0	0.152941	-1	none available
C43F9.9	WBGene00008076	lgc-43	72e27c18-e6f7-4fa7-a200-a2bd44e3a79b	9.61873	3.60702	3.60702	2.40468	21.2275	11.899	6.92383	2.40468	0.303136	0.520958	1	0.217822	none available
C43F9.9	WBGene00008076	lgc-43	164f845c-17e8-4109-a3a2-b72ec6e07f86	6.96529	5.8044	1.16088	0	21.2275	11.899	6.92383	2.40468	0.487805	0.167665	0	-0.32014	none available
C43G2.3	WBGene00016612	C43G2.3	c809e6b3-0175-44a8-b1de-db23d00abffc	3.75904	0.537006	0	3.22204	41.1284	1.30442	5.28087	34.5431	0.411681	0	0.093276	-0.411681	none available
C43G2.3	WBGene00016612	C43G2.3	8e07edb5-e581-41cb-94bb-96134a90efc4	19.6797	0	2.31526	17.3644	41.1284	1.30442	5.28087	34.5431	0	0.438424	0.50269	0.438424	none available
C43H6.6	WBGene00016619	C43H6.6	b477df65-3528-4a0c-8f5f-7d613de58ce0	0.663361	0.663361	0	0	3.3168	2.65344	0.663361	0	0.25	0		-0.25	none available
C43H6.6	WBGene00016619	C43H6.6	0ca07ccb-a047-42ba-81c1-566c3bbb30ff	1.99008	1.32672	0.663361	0	3.3168	2.65344	0.663361	0	0.5	1		0.5	none available
C43H6.6	WBGene00016619	C43H6.6	C43H6.6.1	0.663361	0.663361	0	0	3.3168	2.65344	0.663361	0	0.25	0		-0.25	none available
C44B11.1	WBGene00016633	C44B11.1	c309869b-8830-4edd-ae25-9e5e99d34e39	1.32672	0	1.32672	0	3.98016	2.65344	1.32672	0	0	1		1	none available
C44B11.1	WBGene00016633	C44B11.1	73bf41dd-669c-42d9-9fb9-d48770734373	2.65344	2.65344	0	0	3.98016	2.65344	1.32672	0	1	0		-1	none available
C44B12.1	WBGene00016636	perm-2	C44B12.1.1	350.713	0.438392	24.9883	325.287	2554.07	1.46894	277.087	2275.51	0.298441	0.0901824	0.142951	-0.208259	none available
C44B12.1	WBGene00016636	perm-2	237defe1-21d1-455a-948a-2d46acdf35a1	682.776	0.622403	56.0162	626.137	2554.07	1.46894	277.087	2275.51	0.423709	0.202161	0.275163	-0.221547	none available
C44B12.1	WBGene00016636	perm-2	35758afe-8d57-4ba9-8aa1-d097fc955626	661.212	0	82.0968	579.115	2554.07	1.46894	277.087	2275.51	0	0.296286	0.254499	0.296286	none available
C44B7.11	WBGene00016631	C44B7.11	C44B7.11.1	8.62369	1.99008	4.64352	1.99008	58.4199	24.1645	15.2446	19.0108	0.0823556	0.3046	0.104682	0.222245	none available
C44B7.2	WBGene00016624	hrpl-1	ed6cef96-f7c6-4ec8-bc83-73084c60490a	14.8308	12.8534	0	1.97745	91.5437	41.2823	15.635	34.6264	0.311353	0	0.0571081	-0.311353	none available
C44B7.2	WBGene00016624	hrpl-1	eeba2904-86da-49fa-a9ef-2320f12c2a04	58.9443	15.9641	13.5081	29.4722	91.5437	41.2823	15.635	34.6264	0.386705	0.863962	0.851148	0.477257	none available
C44B7.6	WBGene00016628	slc-36.5	49d19bfd-e6e7-48e5-930d-e6360c5af479	2.65344	1.32672	1.32672	0	26.5344	3.21286	18.7442	4.57738	0.412941	0.0707804	0	-0.342161	none available
C44B9.1	WBGene00008078	vps-50	93e83c98-cd5e-4c94-a738-422cec37de54	6.85473	5.87548	0	0.979246	13.2672	10.4084	0.939761	1.91901	0.564492	0	0.510288	-0.564492	none available
C44B9.1	WBGene00008078	vps-50	168bb1c8-78c0-4cec-b504-13774168c481	3.75904	1.87952	0.939761	0.939761	13.2672	10.4084	0.939761	1.91901	0.180577	1	0.489712	0.819423	none available
C44B9.3	WBGene00008080	C44B9.3	C44B9.3.1	70.9796	57.3671	1.94465	11.6679	95.0817	78.8638	1.94465	14.2732	0.727419	1	0.817468	0.272581	none available
C44B9.4	WBGene00008081	athp-1	0c45f9e7-d7c2-489c-8193-40c9b9b3da88	72.1736	38.4926	2.88694	30.7941	90.217	51.5829	2.88694	35.7472	0.746228	1	0.861441	0.253772	none available
C44B9.5	WBGene00008082	com-1	C44B9.5.1	24.5443	10.3841	2.83204	11.3282	49.9732	17.5657	9.00882	23.3986	0.591161	0.314363	0.484137	-0.276798	com-1 encodes an ortholog of budding yeast Sae2p, Arabidopsis Concise description: com-1 encodes an ortholog of budding yeast Sae2p, Arabidopsis AtCOM1, and human RBBP8 (CTIP; OMIM:604124) and C20orf151; like its yeast ortholog, COM-1 is probably required for completing meiotic recombination; meiotic chromosomes in com-1 mutants pair normally, but form irregular chromatin aggregates instead of di…
C44B9.5	WBGene00008082	com-1	239ff00d-061a-44ba-a5d4-7e3a2a279990	6.63361	0.947658	2.84297	2.84297	49.9732	17.5657	9.00882	23.3986	0.0539494	0.315577	0.121502	0.261627	com-1 encodes an ortholog of budding yeast Sae2p, Arabidopsis Concise description: com-1 encodes an ortholog of budding yeast Sae2p, Arabidopsis AtCOM1, and human RBBP8 (CTIP; OMIM:604124) and C20orf151; like its yeast ortholog, COM-1 is probably required for completing meiotic recombination; meiotic chromosomes in com-1 mutants pair normally, but form irregular chromatin aggregates instead of di…
C44C1.6	WBGene00016645	C44C1.6	6f16eb40-17e3-469d-aff2-8f682974578f	23.2882	0.931529	14.9045	7.45223	45.806	0.931529	33.8088	11.0657	1	0.440845	0.673453	-0.559155	none available
C44C10.11	WBGene00043985	C44C10.11	c3614cda-253f-4c4e-ace8-e61214979bdf	7.96033	1.32672	5.30688	1.32672	11.9405	2.65344	6.63361	2.65344	0.5	0.8	0.5	0.3	none available
C44C10.11	WBGene00043985	C44C10.11	146a2c46-73c1-4466-ab6c-c43ac89d5e4f	1.32672	1.32672	0	0	11.9405	2.65344	6.63361	2.65344	0.5	0	0	-0.5	none available
C44C10.9	WBGene00008089	C44C10.9	05cd1c94-64a1-4265-b67c-5d2e9f4250fb	15.9207	8.68399	4.342	2.89466	17.2474	8.68399	5.66872	2.89466	1	0.765957	1	-0.234043	none available
C44C10.9	WBGene00008089	C44C10.9	940e581d-6837-447e-8164-cf27f3b4ef8f	1.32672	0	1.32672	0	17.2474	8.68399	5.66872	2.89466	0	0.234043	0	0.234043	none available
C44E4.5	WBGene00016654	C44E4.5	d9dbb7bf-f093-45c9-9946-e17d3c902fdd	28.3587	10.5032	5.2516	12.6038	46.4352	19.9561	6.95147	19.5277	0.526316	0.755467	0.645435	0.229151	none available
C44F1.1	WBGene00008091	C44F1.1	c0aa104a-410e-467c-be38-2afb1f20d019	10.8349	7.22326	0.902907	2.70872	23.2176	15.1099	3.82661	4.28113	0.478049	0.235955	0.632712	-0.242094	none available
C44H4.8	WBGene00008096	C44H4.8	913b27d4-2246-4f0c-986e-5c8abe94068a	7.29697	3.64848	2.43232	1.21616	9.28705	4.64352	2.43232	2.2112	0.785714	1	0.55	0.214286	none available
C44H4.8	WBGene00008096	C44H4.8	d6abf56a-2c96-4a11-87f8-7f0667fc328e	1.99008	0.995041	0	0.995041	9.28705	4.64352	2.43232	2.2112	0.214286	0	0.45	-0.214286	none available
C44H9.6	WBGene00008101	C44H9.6	0415ac6f-9b0b-4011-8135-00ccedbc8fd1	1.99008	0.995041	0	0.995041	13.9306	2.51524	5.71227	5.70306	0.395604	0	0.174475	-0.395604	none available
C44H9.6	WBGene00008101	C44H9.6	9f419f43-858a-43d4-9571-0a0f9716a740	6.85473	0.856841	3.42736	2.57052	13.9306	2.51524	5.71227	5.70306	0.340659	0.6	0.450727	0.259341	none available
C44H9.6	WBGene00008101	C44H9.6	C44H9.6.3	1.32672	0.663361	0	0.663361	13.9306	2.51524	5.71227	5.70306	0.263736	0	0.116317	-0.263736	none available
C44H9.6	WBGene00008101	C44H9.6	77713c2f-6421-4cd7-a471-9574ee02ac1a	1.32672	0	1.32672	0	13.9306	2.51524	5.71227	5.70306	0	0.232258	0	0.232258	none available
C45E1.4	WBGene00016663	C45E1.4	f24f8170-a317-4122-9603-c4242cb8684a	5.97024	2.3881	3.58215	0	15.9207	2.3881	12.3006	1.23196	1	0.291217	0	-0.708783	none available
C45E1.4	WBGene00016663	C45E1.4	f027d566-e1af-4300-8942-7f2187eb9e0a	8.62369	0	7.39173	1.23196	15.9207	2.3881	12.3006	1.23196	0	0.600924	1	0.600924	none available
C45G3.3	WBGene00001590	C45G3.3	484fae64-3095-44ad-a9df-c50526a6ccd0	2.65344	0	1.32672	1.32672	21.2275	14.1517	2.65344	4.4224	0	0.5	0.3	0.5	none available
C45G3.3	WBGene00001590	C45G3.3	7ed941f8-d30a-4b1c-bd64-cf291eb07006	4.64352	3.09568	0	1.54784	21.2275	14.1517	2.65344	4.4224	0.21875	0	0.35	-0.21875	none available
C46C11.4	WBGene00044567	C46C11.4	84296382-859c-4bd3-a5ab-8391fbc6a374	17.0805	16.0758	1.00474	0	30.394	29.3892	1.00474	0	0.546996	1		0.453004	none available
C46E10.5	WBGene00016711	fbxc-53	ef191b7b-adea-4252-9858-b8cd0e6b6098	3.75904	3.75904	0	0	12.825	12.0037	0.821303	0	0.313158	0		-0.313158	none available
C46E10.5	WBGene00016711	fbxc-53	cd526d39-8944-47a3-8d91-99adf56d9465	5.74912	4.92782	0.821303	0	12.825	12.0037	0.821303	0	0.410526	1		0.589474	none available
C46F11.1	WBGene00006822	unc-93	C46F11.1a.1	1.32672	0.663361	0	0.663361	9.28705	2.25543	4.7762	2.25543	0.294118	0	0.294118	-0.294118	unc-93 encodes a novel transmembrane protein that affects muscle Concise description: unc-93 encodes a novel transmembrane protein that affects muscle contraction and egg laying; UNC-93 is predicted to be a component of a multi-protein complex containing the SUP-9 two-pore potassium channel and the SUP-10 transmembrane protein; an UNC-93::GFP fusion protein is expressed in body wall muscle membra…
C46F11.3	WBGene00008118	madf-8	9862303e-b747-4a38-b15b-e4ea157fe1c9	11.9405	6.63361	0	5.30688	133.999	28.8582	11.0171	94.1235	0.229869	0	0.0563821	-0.229869	none available
C46F11.5	WBGene00008120	C46F11.5	79d6d847-264a-40cb-9e80-83997af7620b	36.1531	27.1149	2.58237	6.45592	202.988	98.4589	34.9253	69.6041	0.275393	0.0739398	0.092752	-0.201453	none available
C46F2.1	WBGene00016714	C46F2.1	C46F2.1.1	31.1779	2.3983	0	28.7796	38.9171	2.3983	1.13719	35.3817	1	0	0.813406	-1	none available
C46F2.1	WBGene00016714	C46F2.1	f5231f53-1338-4005-8760-fa8f6e169602	0.884481	0	0.44224	0.44224	38.9171	2.3983	1.13719	35.3817	0	0.388889	0.0124991	0.388889	none available
C46F2.1	WBGene00016714	C46F2.1	ae849b48-9192-4407-a908-f815f7e1a0c3	4.86464	0	0.694949	4.16969	38.9171	2.3983	1.13719	35.3817	0	0.611111	0.117849	0.611111	none available
C46F4.1	WBGene00001175	egl-6	34ab9c9d-86ae-413a-9cd3-c94867ec49cd	11.9405	2.7555	0.918499	8.26649	19.9008	4.74558	2.90858	12.2467	0.580645	0.315789	0.675	-0.264856	egl-6 encodes a G protein-coupled receptor; EGL-6 functions Concise description: egl-6 encodes a G protein-coupled receptor; EGL-6 functions as a receptor for FMRFamide-related peptides that inhibit activity of the HSN motor neurons; an EGL-6::GFP reporter fusion is expressed primarily in the HSN neurons
C46H11.2	WBGene00016728	C46H11.2	05d8af37-7494-4f08-8f57-31805727c494	1.6584	0.829201	0.829201	0	28.8341	3.36379	18.6733	6.79696	0.246508	0.0444056	0	-0.202102	none available
C46H3.2	WBGene00016725	C46H3.2	C46H3.2b.1	6.85473	4.56982	1.14245	1.14245	40.3544	34.7283	2.29908	3.327	0.131588	0.496917	0.343389	0.36533	none available
C46H3.2	WBGene00016725	C46H3.2	C46H3.2c.1	7.51809	5.20483	1.15663	1.15663	40.3544	34.7283	2.29908	3.327	0.149873	0.503083	0.347649	0.35321	none available
C46H3.2	WBGene00016725	C46H3.2	426e0670-188f-4e6d-b5b3-36a0fe3456b8	11.653	11.0397	0	0.613318	40.3544	34.7283	2.29908	3.327	0.317888	0	0.184345	-0.317888	none available
C47B2.1	WBGene00008130	fbxa-140	42ed67a0-5bb3-471a-84d6-bafde6eec199	10.6138	1.51625	4.54876	4.54876	15.9207	2.84297	4.54876	8.52892	0.533333	1	0.533333	0.466667	This gene encodes a protein containing an F-box, a motif predicted Concise description: This gene encodes a protein containing an F-box, a motif predicted to mediate protein-protein interactions either with homologs of yeast Skp-1p or with other proteins; this gene's encoded protein also contains an FTH/DUF38 motif,
C47B2.1	WBGene00008130	fbxa-140	2b161b4f-ec94-421d-ad5f-c41cb77b779c	2.65344	1.32672	0	1.32672	15.9207	2.84297	4.54876	8.52892	0.466667	0	0.155556	-0.466667	This gene encodes a protein containing an F-box, a motif predicted Concise description: This gene encodes a protein containing an F-box, a motif predicted to mediate protein-protein interactions either with homologs of yeast Skp-1p or with other proteins; this gene's encoded protein also contains an FTH/DUF38 motif,
C47C12.3	WBGene00004335	ref-2	2860e6be-8ea2-4fc7-bcb7-37b054d092da	2.43232	1.62155	0.810774	0	47.762	44.4404	3.32156	0	0.0364881	0.244094		0.207606	ref-2 encodes a zinc-finger transcription factor of the Opa/Zic Concise description: ref-2 encodes a zinc-finger transcription factor of the Opa/Zic family and is similar to the human proteins ZIC1 and ZIC2 (zinc finger protein of cerebellum 1/2); ref-2 in elegans is required for both the generation of the Pn.p ventral epideraml cells, and to maintain them in an unfused state, in both hermaphrodi…
C47C12.6	WBGene00000950	deg-1	61d8b461-ac7f-445a-84f5-9751a4dcdf82	1.32672	1.32672	0	0	3.98016	1.32672	2.65344	0	1	0		-1	deg-1 encodes a putative ion channel for which altered function Concise description: deg-1 encodes a putative ion channel for which altered function induces necrotic cell death of neurons required for mechanosensory behavior; expressed
C47C12.6	WBGene00000950	deg-1	bd0e21c1-4cc1-45c4-9416-a8234f26a30b	2.65344	0	2.65344	0	3.98016	1.32672	2.65344	0	0	1		1	deg-1 encodes a putative ion channel for which altered function Concise description: deg-1 encodes a putative ion channel for which altered function induces necrotic cell death of neurons required for mechanosensory behavior; expressed
C47D12.3	WBGene00008137	sfxn-1.4	91d47c80-b9d1-4e58-9ff6-0501ecb4f429	6.63361	2.65344	1.32672	2.65344	15.9207	2.65344	4.80936	8.45785	1	0.275862	0.313725	-0.724138	none available
C47D12.3	WBGene00008137	sfxn-1.4	C47D12.3a.1	9.28705	0	3.48264	5.8044	15.9207	2.65344	4.80936	8.45785	0	0.724138	0.686275	0.724138	none available
C47E12.6	WBGene00008150	mam-2	45117727-c814-4d67-81d2-08994da6979b	2.65344	2.65344	0	0	9.28705	7.62865	1.6584	0	0.347826	0		-0.347826	none available
C47E12.6	WBGene00008150	mam-2	04394c4d-2c53-4701-af2e-3719518dbbf2	3.98016	2.98512	0.995041	0	9.28705	7.62865	1.6584	0	0.391304	0.6		0.208696	none available
C47E12.6	WBGene00008150	mam-2	72fc659f-45fa-4e17-8cd8-27de07614a05	1.32672	0.663361	0.663361	0	9.28705	7.62865	1.6584	0	0.0869565	0.4		0.313043	none available
C47E8.11	WBGene00044180	C47E8.11	6bf7f974-ad7a-484d-b720-573232400430	5.97024	0	2.3881	3.58215	9.95041	1.32672	3.71482	4.90887	0	0.642857	0.72973	0.642857	none available
C47E8.11	WBGene00044180	C47E8.11	eb226f3a-8e5b-4093-97fa-20e138ceb3e6	3.98016	1.32672	1.32672	1.32672	9.95041	1.32672	3.71482	4.90887	1	0.357143	0.27027	-0.642857	none available
C47E8.8	WBGene00008145	set-5	495af868-4782-4219-b2bc-7a88060fabdd	5.30688	0.758126	0.758126	3.79063	11.9405	3.24573	1.58733	7.10743	0.233577	0.477612	0.533333	0.244035	set-5 encodes a large (1,675-residue) protein with an N-terminal Concise description: set-5 encodes a large (1,675-residue) protein with an N-terminal SET domain and a C-terminal SPK domain; SET-5 has no non-nematode orthologs, but is paralogous to Y57A10A.1; SET-5's domain organization resembles that of SET-24;
C47E8.8	WBGene00008145	set-5	0842336d-d5ad-4fe3-bb8a-36fcae3e1dab	6.63361	2.4876	0.829201	3.3168	11.9405	3.24573	1.58733	7.10743	0.766423	0.522388	0.466667	-0.244035	set-5 encodes a large (1,675-residue) protein with an N-terminal Concise description: set-5 encodes a large (1,675-residue) protein with an N-terminal SET domain and a C-terminal SPK domain; SET-5 has no non-nematode orthologs, but is paralogous to Y57A10A.1; SET-5's domain organization resembles that of SET-24;
C47E8.9	WBGene00008146	C47E8.9	45f73494-2c57-474c-beae-27ff514d0e01	5.30688	5.30688	0	0	6.63361	5.30688	1.32672	0	1	0		-1	none available
C47E8.9	WBGene00008146	C47E8.9	2baa1a39-1c3f-4bd7-9d57-cf5fa99f3cd0	1.32672	0	1.32672	0	6.63361	5.30688	1.32672	0	0	1		1	none available
C48B4.1	WBGene00008167	acox-1.5	1edc962d-0482-4486-a571-ae918cc98b82	56.3856	2.30145	18.4116	35.6725	99.4893	7.80672	33.525	58.1576	0.294804	0.549191	0.613377	0.254386	none available
C48B4.2	WBGene00004401	rom-2	23021b6f-d392-4a84-af6f-fc10f0588ec1	24.3232	17.3737	5.79124	1.15825	34.4947	19.5849	13.7516	1.15825	0.887097	0.421133	1	-0.465964	none available
C48B4.2	WBGene00004401	rom-2	249d862a-e3f9-4de2-bd1d-9cc21a4bc0a5	7.07585	1.76896	5.30688	0	34.4947	19.5849	13.7516	1.15825	0.0903226	0.385911	0	0.295589	none available
C48B4.3	WBGene00008168	C48B4.3	87966937-e53c-44ee-b575-4c17b6f2a20e	8.18145	4.09072	2.04536	2.04536	19.0163	14.207	2.04536	2.764	0.287938	1	0.74	0.712062	none available
C48B4.3	WBGene00008168	C48B4.3	6415a720-fab0-42fa-bba5-940f97dcde9d	3.98016	3.98016	0	0	19.0163	14.207	2.04536	2.764	0.280156	0	0	-0.280156	none available
C48B6.3	WBGene00016741	C48B6.3	C48B6.3.1	59.6539	21.256	1.37135	37.0265	205.392	61.1855	16.0958	128.111	0.347402	0.0851997	0.28902	-0.262203	none available
C48D1.1	WBGene00008177	C48D1.1	ef27cc46-2f6d-4f43-b358-ae1ae2ca4fc7	18.556	16.1357	2.42035	0	70.865	47.5916	21.8168	1.45653	0.339044	0.110939	0	-0.228105	none available
C48E7.5	WBGene00000583	cof-2	C48E7.5.1	1.32672	1.32672	0	0	13.2672	4.59193	3.56372	5.11156	0.288925	0	0	-0.288925	cof-2 encodes a type II transmembrane protein containing extracellular Concise description: cof-2 encodes a type II transmembrane protein containing extracellular collage-like repeats and a highly conserved olfactomedin (OLF) domain, and is homologous to human GLC1A, which when mutated leads to glaucome primary open angle (OMIM:137750);
C48E7.7	WBGene00016752	C48E7.7	5e4a0a2d-5e5e-41f6-b51a-32fbded48dc6	199.025	0.839766	14.276	183.909	222.873	1.68581	15.9681	205.219	0.498138	0.894033	0.896159	0.395895	none available
C49A1.4	WBGene00001377	eya-1	941515b3-fdd5-4d15-89a7-72f8ad26cb3d	26.7113	26.7113	0	0	65.5621	64.4842	1.07796	0	0.414231	0		-0.414231	eya-1 encodes a protein orthologous to the Eyes absent/Eya Concise description: eya-1 encodes a protein orthologous to the Eyes absent/Eya Drosophila protein which is involved in eye development and has protein tyrosine phosphatase ; RNA interference and mutant studies indicate that eya-1 is involved in embryonic and larval tissue morphogenesis as well as larval viability; eya-1 mutants show incr…
C49A1.4	WBGene00001377	eya-1	46dbecfa-5954-4d2e-a541-f2b82e75ec81	4.31184	3.23388	1.07796	0	65.5621	64.4842	1.07796	0	0.05015	1		0.94985	eya-1 encodes a protein orthologous to the Eyes absent/Eya Concise description: eya-1 encodes a protein orthologous to the Eyes absent/Eya Drosophila protein which is involved in eye development and has protein tyrosine phosphatase ; RNA interference and mutant studies indicate that eya-1 is involved in embryonic and larval tissue morphogenesis as well as larval viability; eya-1 mutants show incr…
C49A9.2	WBGene00016756	C49A9.2	d0193dc6-a103-4501-a58f-f0cfd3e87ed2	1.48466	0.371166	0	1.1135	10.6138	1.36621	0.995041	8.25252	0.271676	0	0.134928	-0.271676	none available
C49A9.5	WBGene00016759	C49A9.5	56c2b360-d6bc-47bc-a626-a9c2112edb7f	1.32672	0.663361	0.663361	0	6.63361	1.72474	3.84749	1.06138	0.384615	0.172414	0	-0.212202	none available
C49A9.5	WBGene00016759	C49A9.5	d790d521-145a-4a82-89df-cd0a270cad3e	5.30688	1.06138	3.18413	1.06138	6.63361	1.72474	3.84749	1.06138	0.615385	0.827586	1	0.212202	none available
C49A9.9	WBGene00016763	C49A9.9	f6c0aa39-943b-4eb4-803b-2e0b2ae395c8	56.054	11.6779	23.3558	21.0202	94.1972	13.6443	51.3449	29.208	0.855882	0.454881	0.719674	-0.401001	none available
C49A9.9	WBGene00016763	C49A9.9	1626aa17-c728-4a7f-8517-f1f6bcf7aa96	27.5295	1.96639	19.6639	5.89917	94.1972	13.6443	51.3449	29.208	0.144118	0.382977	0.201971	0.238859	none available
C49C3.10	WBGene00008200	C49C3.10	ec49f943-866b-423f-8cba-68c3db293df8	11.7194	1.30215	2.6043	7.81291	42.4551	2.82788	17.2009	21.0996	0.460469	0.151405	0.370288	-0.309064	none available
C49C3.10	WBGene00008200	C49C3.10	ea119363-7af3-40fa-a9f4-df58e17b72d9	4.31184	0.862369	1.72474	1.72474	42.4551	2.82788	17.2009	21.0996	0.304952	0.10027	0.0817428	-0.204682	none available
C49C3.10	WBGene00008200	C49C3.10	dda13c59-59b6-4e08-a6b7-4e23eb5c621c	15.3679	0	11.1766	4.19123	42.4551	2.82788	17.2009	21.0996	0	0.649769	0.198641	0.649769	none available
C49C8.2	WBGene00016766	C49C8.2	ab31b092-f464-4365-a59b-caddf5b9380a	1.99008	0.995041	0	0.995041	19.9008	4.87315	10.2055	4.82212	0.204188	0	0.206349	-0.204188	none available
C49C8.2	WBGene00016766	C49C8.2	e5cf7767-3af1-4ce8-9b1c-93dd40e3ace7	16.584	2.55139	10.2055	3.82708	19.9008	4.87315	10.2055	4.82212	0.52356	1	0.793651	0.47644	none available
C49C8.2	WBGene00016766	C49C8.2	6f31ba8b-71e3-412a-b393-a312e2441697	1.32672	1.32672	0	0	19.9008	4.87315	10.2055	4.82212	0.272251	0	0	-0.272251	none available
C49F5.10	WBGene00219571	linc-15	34c99de4-7e33-4a47-bdd0-bba5fc2f5ea5	20.1662	1.12034	14.5644	4.48137	70.3162	7.45912	37.2956	25.5615	0.150198	0.390514	0.175317	0.240316	none available
C49F5.2	WBGene00008206	set-6	4484fda3-e235-42c7-b99e-f276b0ed98a0	11.2771	8.30946	1.7806	1.18707	19.9008	15.6064	1.7806	2.51379	0.532438	1	0.472222	0.467562	set-6 encodes a putative histone H3 lysine-9 methyltransferase; Concise description: set-6 encodes a putative histone H3 lysine-9 methyltransferase; SET-6 has no non-nematode orthologs, but several paralogs (SET-13, SET-15, SET-19, SET-20, SET-21, and SET-32); neither set-6(tm1611) nor set-6(RNAi) have any obvious
C49F5.3	WBGene00008207	C49F5.3	a88b8f75-60f1-46be-b05c-291fade4d8c9	46.2583	28.6361	2.20278	15.4194	56.5625	37.6389	2.20278	16.7209	0.760812	1	0.922166	0.239188	none available
C49F5.3	WBGene00008207	C49F5.3	391858f9-7e82-4c79-afeb-ebb3045175ff	9.11015	7.8087	0	1.30145	56.5625	37.6389	2.20278	16.7209	0.207464	0	0.0778338	-0.207464	none available
C49F5.6	WBGene00008210	C49F5.6	25207fa8-f31b-4f01-88d3-93e640d7c9ed	34.0746	12.3249	4.34995	17.3998	67.7733	25.5189	6.18022	36.0743	0.482971	0.70385	0.482333	0.220879	none available
C49F8.2	WBGene00008214	gem-1	4f0867c2-c307-477f-9d5d-238e6aa72b84	1.32672	0.663361	0.663361	0	2.65344	0.663361	1.99008	0	1	0.333333		-0.666667	none available
C49F8.2	WBGene00008214	gem-1	8fb2a824-23a6-454e-bcb4-ae5fe8fa4ac8	1.32672	0	1.32672	0	2.65344	0.663361	1.99008	0	0	0.666667		0.666667	none available
C49G7.10	WBGene00016788	C49G7.10	C49G7.10a.1	24.4259	0	10.4682	13.9576	73.8399	3.77458	45.8443	24.2211	0	0.228343	0.576261	0.228343	none available
C49G7.11	WBGene00016789	djr-1.2	cb59c5b3-a85d-43a0-abe2-75eadf93a23c	6.85473	0.761636	6.09309	0	10.3926	3.12025	7.2724	0	0.244094	0.837838		0.593743	djr-1.2 encodes a glyoxylase orthologous to human DJ-1; DJR-1.2 Concise description: djr-1.2 encodes a glyoxylase orthologous to human DJ-1; DJR-1.2 is expressed throughout the life cycle in a variety of tissues including pharyngeal muscles, the pharyngeal-intestinal valve, the ventral nerve cord, spermatheca, rectal gland cell, inner labial (IL) cells of head neurons, the phasmid (PHA/PHB) neuro…
C49G7.11	WBGene00016789	djr-1.2	c4e58f37-ea3c-4462-bce0-2fd91c009913	3.53792	2.35862	1.17931	0	10.3926	3.12025	7.2724	0	0.755906	0.162162		-0.593743	djr-1.2 encodes a glyoxylase orthologous to human DJ-1; DJR-1.2 Concise description: djr-1.2 encodes a glyoxylase orthologous to human DJ-1; DJR-1.2 is expressed throughout the life cycle in a variety of tissues including pharyngeal muscles, the pharyngeal-intestinal valve, the ventral nerve cord, spermatheca, rectal gland cell, inner labial (IL) cells of head neurons, the phasmid (PHA/PHB) neuro…
C49G7.12	WBGene00077593	C49G7.12	b552ac87-ac2b-4a01-af7c-27d13c8f8e78	4.02439	0.670731	3.35366	0	34.8928	1.85517	28.2999	4.73774	0.361548	0.118504	0	-0.243043	none available
C49G7.8	WBGene00016786	cyp-35A4	897df462-affa-45e4-9bf9-3acd2825a5ae	15.0362	7.07585	1.76896	6.19136	17.9107	8.95537	1.76896	7.18641	0.790123	1	0.861538	0.209877	cyp-35A4 encodes one of over 80 C. elegans cytochrome P450s, Concise description: cyp-35A4 encodes one of over 80 C. elegans cytochrome P450s, NADPH-dependent monooxygenases that metabolize endogenous and exogenous compounds; loss of cyp-35A/C gene family activity in the presence of xenobiotics can diminish the reproductive decline seen in wild-type worms treated with the same compounds;
C49H3.1	WBGene00001535	gcy-8	48118609-dd6b-4def-91cd-65d05d5b93d9	0.44224	0.44224	0	0	2.65344	1.43728	1.21616	0	0.307692	0		-0.307692	gcy-8 encodes a receptor-type guanylyl cyclase that, along Concise description: gcy-8 encodes a receptor-type guanylyl cyclase that, along with gcy-18 and gcy-23, constitutes a subfamily of guanylyl cyclase genes in C. elegans; gcy-8 functions redundantly with gcy-18 and gcy-23, and upstream of tax-4, to regulate thermotaxis via the AFD thermosensory neurons, although of the three guanylyl cyclas…
C49H3.1	WBGene00001535	gcy-8	2ae41bf8-4b34-476f-b9da-d750f55738a3	0.663361	0	0.663361	0	2.65344	1.43728	1.21616	0	0	0.545455		0.545455	gcy-8 encodes a receptor-type guanylyl cyclase that, along Concise description: gcy-8 encodes a receptor-type guanylyl cyclase that, along with gcy-18 and gcy-23, constitutes a subfamily of guanylyl cyclase genes in C. elegans; gcy-8 functions redundantly with gcy-18 and gcy-23, and upstream of tax-4, to regulate thermotaxis via the AFD thermosensory neurons, although of the three guanylyl cyclas…
C49H3.1	WBGene00001535	gcy-8	a7b54546-6625-4e67-ab3f-2430fb967c8f	0.44224	0.44224	0	0	2.65344	1.43728	1.21616	0	0.307692	0		-0.307692	gcy-8 encodes a receptor-type guanylyl cyclase that, along Concise description: gcy-8 encodes a receptor-type guanylyl cyclase that, along with gcy-18 and gcy-23, constitutes a subfamily of guanylyl cyclase genes in C. elegans; gcy-8 functions redundantly with gcy-18 and gcy-23, and upstream of tax-4, to regulate thermotaxis via the AFD thermosensory neurons, although of the three guanylyl cyclas…
C50A2.2	WBGene00016796	cec-2	8cc3dabf-5d9c-4f16-bd5b-dfa7e726d806	3.98016	0	0.796033	3.18413	10.6138	0.829201	1.62523	8.15933	0	0.489796	0.390244	0.489796	none available
C50A2.2	WBGene00016796	cec-2	a2b8875a-f347-4331-908b-f8cc03ea51ac	3.3168	0.829201	0.829201	1.6584	10.6138	0.829201	1.62523	8.15933	1	0.510204	0.203252	-0.489796	none available
C50B6.4	WBGene00000734	col-161	779936a6-7a77-49f2-835e-01fb6c281729	6.74417	0.518782	2.07513	4.15026	84.7996	1.47816	19.1569	64.1645	0.350965	0.108323	0.0646814	-0.242642	none available
C50B6.9	WBGene00008222	C50B6.9	C50B6.9.1	3.98016	2.65344	1.32672	0	26.2027	22.0604	3.27995	0.862369	0.120281	0.404494	0	0.284214	none available
C50B8.6	WBGene00008228	C50B8.6	8c2d73f6-47e9-4ec7-a274-6f74ddbdaa8f	9.50817	2.11293	3.16939	4.22585	40.465	19.6183	9.29555	11.1089	0.107702	0.340958	0.380401	0.233256	none available
C50C3.1	WBGene00016799	C50C3.1	dccf37d4-7d7d-4c02-b75d-4c9375dcb8a1	22.0593	5.67239	1.26053	15.1264	167.167	47.2447	3.7449	116.177	0.120064	0.336599	0.130201	0.216535	none available
C50C3.1	WBGene00016799	C50C3.1	efd6b9c7-bb1b-4df1-91a6-ac6cab85d0ac	57.1289	13.1836	0	43.9453	167.167	47.2447	3.7449	116.177	0.27905	0	0.378261	-0.27905	none available
C50C3.7	WBGene00086546	cil-1	30738d3f-75e7-4ee0-a67b-dd41f63598e3	2.59816	1.03926	0	1.5589	37.0045	4.75132	4.48321	27.7699	0.218732	0	0.0561362	-0.218732	none available
C50C3.7	WBGene00086546	cil-1	a6ac3258-027a-49c4-a566-3fc8352b1084	26.8993	3.36241	4.48321	19.0536	37.0045	4.75132	4.48321	27.7699	0.707679	1	0.686125	0.292321	none available
C50D2.10	WBGene00044420	C50D2.10	C50D2.10a.2	3.3168	1.1056	0	2.2112	31.6865	5.20798	2.52961	23.9489	0.21229	0	0.0923299	-0.21229	none available
C50D2.10	WBGene00044420	C50D2.10	83473a30-5727-4118-9c26-5a4e33ebcd4e	8.11511	1.47547	0	6.63964	31.6865	5.20798	2.52961	23.9489	0.28331	0	0.277242	-0.28331	none available
C50D2.10	WBGene00044420	C50D2.10	daa31416-8505-455d-8b02-2bf4d7c63f74	12.6481	0.843205	2.52961	9.27525	31.6865	5.20798	2.52961	23.9489	0.161906	1	0.387293	0.838094	none available
C50D2.4	WBGene00000644	col-68	f2f338c8-b58c-4a54-961f-9957635a1f04	3.58215	1.79107	0.895537	0.895537	21.2275	9.17759	1.94033	10.1096	0.195157	0.461538	0.0885827	0.266381	none available
C50D2.7	WBGene00016810	C50D2.7	10e6ba7e-8eb4-439f-a827-b593e59c5a29	70.2713	29.7301	24.3247	16.2164	159.109	81.4673	41.8953	35.7467	0.364934	0.580605	0.453649	0.215672	none available
C50D2.8	WBGene00016811	C50D2.8	C50D2.8c	9.28705	5.30688	0	3.98016	23.7578	10.6898	5.49969	7.56832	0.496445	0	0.525898	-0.496445	none available
C50E10.4	WBGene00004945	sop-2	14960ce3-d32d-47c7-b768-1dd75d81da79	1.32672	0	1.32672	0	44.0029	39.7898	2.70072	1.51239	0	0.491248	0	0.491248	sop-2 encodes a SAM domain-containing protein that is related Concise description: sop-2 encodes a SAM domain-containing protein that is related to, but not orthologous with, Polycomb group proteins and ETS transcription factors; during development, SOP-2 activity is required for the proper integration of sexual, spatial, and temporal information during cell fate specification; specifically, SOP-…
C50E10.4	WBGene00004945	sop-2	9f7619a7-4119-4205-8313-0af2ac3146cf	8.86692	8.42357	0	0.443346	44.0029	39.7898	2.70072	1.51239	0.211702	0	0.293143	-0.211702	sop-2 encodes a SAM domain-containing protein that is related Concise description: sop-2 encodes a SAM domain-containing protein that is related to, but not orthologous with, Polycomb group proteins and ETS transcription factors; during development, SOP-2 activity is required for the proper integration of sexual, spatial, and temporal information during cell fate specification; specifically, SOP-…
C50E3.11	WBGene00016822	C50E3.11	04788242-2ced-41eb-955f-fb6bc110f0c0	8.40257	0.933618	1.86724	5.60171	74.2964	8.98933	5.63929	59.6678	0.103859	0.331112	0.0938817	0.227254	none available
C50E3.12	WBGene00016823	C50E3.12	122b59f6-156a-4109-8b06-b5e92b174ea4	15.4121	10.9169	0	4.49519	38.9835	29.4791	0.798043	8.70638	0.370327	0	0.51631	-0.370327	none available
C50E3.12	WBGene00016823	C50E3.12	bc46b1e4-b07f-4c51-9d89-1e5ba8cfa52f	8.77847	7.18239	0.798043	0.798043	38.9835	29.4791	0.798043	8.70638	0.243644	1	0.0916618	0.756356	none available
C50E3.12	WBGene00016823	C50E3.12	C50E3.12.1	8.44679	6.63676	0	1.81003	38.9835	29.4791	0.798043	8.70638	0.225135	0	0.207897	-0.225135	none available
C50F4.1	WBGene00008229	C50F4.1	C50F4.1.2	200.998	19.4146	109.635	71.9482	334.294	24.4078	198.819	111.067	0.795428	0.551434	0.647789	-0.243993	none available
C50H11.15	WBGene00016860	cyp-33C9	d1fa3d07-c593-496c-9a49-3632d49859ef	9.61873	1.06875	4.27499	4.27499	33.168	1.06875	13.1267	18.9726	1	0.325671	0.225325	-0.674329	none available
C50H11.15	WBGene00016860	cyp-33C9	40e69669-ae4f-45c5-8d56-6a75a179f46d	12.2722	0	5.36907	6.9031	33.168	1.06875	13.1267	18.9726	0	0.409019	0.363846	0.409019	none available
C50H2.1	WBGene00008239	fshr-1	6b0ff664-eb27-42cc-8169-37400bc369f9	5.85968	0	2.51129	3.34839	18.5741	2.09713	9.65909	6.81787	0	0.259993	0.49112	0.259993	fshr-1 encodes a putative neuropeptide receptor required for Concise description: fshr-1 encodes a putative neuropeptide receptor required for normal acetylcholine secretion by synapses; FSHR-1 is orthologous to human follicle-stimulating hormone receptor (OMIM:136435; mutated in ovarian dysgenesis), thyrotropin receptor (OMIM:603372; mutated in hyperthyroidism), and luteinizing hormone receptor …
C50H2.1	WBGene00008239	fshr-1	34363f92-702d-4bde-ba20-5cb2382c8cbb	6.52304	1.44957	2.89913	2.17435	18.5741	2.09713	9.65909	6.81787	0.691213	0.300145	0.318919	-0.391068	fshr-1 encodes a putative neuropeptide receptor required for Concise description: fshr-1 encodes a putative neuropeptide receptor required for normal acetylcholine secretion by synapses; FSHR-1 is orthologous to human follicle-stimulating hormone receptor (OMIM:136435; mutated in ovarian dysgenesis), thyrotropin receptor (OMIM:603372; mutated in hyperthyroidism), and luteinizing hormone receptor …
C51E3.6	WBGene00008252	C51E3.6	C51E3.6.1	9.95041	6.12333	0.765416	3.06166	19.2375	8.11341	5.40894	5.71511	0.754717	0.141509	0.535714	-0.613208	none available
C51E3.6	WBGene00008252	C51E3.6	491e1de4-285c-4574-b7f3-28ca7da216f7	5.30688	0	2.65344	2.65344	19.2375	8.11341	5.40894	5.71511	0	0.490566	0.464286	0.490566	none available
C52A10.1	WBGene00016862	C52A10.1	01a19162-8107-4699-9c17-5b8a2be653e5	6.41248	1.06875	1.06875	4.27499	67.6628	2.40504	26.9132	38.3445	0.444379	0.0397109	0.111489	-0.404668	none available
C52A10.2	WBGene00016863	C52A10.2	6a5df2de-7309-4e37-b92c-92aabba156f1	7.46496	4.97664	1.65888	0.82944	20.0645	16.2495	2.9856	0.82944	0.306265	0.555627	1	0.249362	none available
C52A10.2	WBGene00016863	C52A10.2	38f87473-03cd-4703-a27d-8b346510880f	2.65344	1.32672	1.32672	0	20.0645	16.2495	2.9856	0.82944	0.0816471	0.444373	0	0.362726	none available
C52B11.3	WBGene00016872	dop-4	86584908-1835-4252-bb90-80458e077f35	0.33168	0	0.33168	0	2.764	0.810774	1.14245	0.810774	0	0.290323	0	0.290323	none available
C52B11.5	WBGene00016874	C52B11.5	f5111df8-21d5-42c6-b311-6fdaf336917f	7.5402	0.62835	1.88505	5.0268	88.9661	1.04588	26.3367	61.5835	0.600788	0.071575	0.0816257	-0.529213	none available
C52B11.5	WBGene00016874	C52B11.5	7723dcab-db30-4a38-b296-e8cbe97dce99	7.09796	0.417527	2.50516	4.17527	88.9661	1.04588	26.3367	61.5835	0.399212	0.0951205	0.0677985	-0.304092	none available
C52B11.5	WBGene00016874	C52B11.5	0eeb0819-85d2-4ea2-b8a4-85c626df7477	36.6301	0	7.66677	28.9634	88.9661	1.04588	26.3367	61.5835	0	0.291106	0.47031	0.291106	none available
C52B11.5	WBGene00016874	C52B11.5	611c8efc-aefc-4871-9c35-385f39d2147b	14.9382	0	6.1111	8.82715	88.9661	1.04588	26.3367	61.5835	0	0.232037	0.143336	0.232037	none available
C52B9.1	WBGene00000510	cka-2	3134aede-dc04-4876-acea-a37f08adabca	17.5791	11.7194	2.92984	2.92984	46.7669	20.1809	14.6511	11.935	0.580716	0.199975	0.245484	-0.380741	cka-2 encodes an isoform of choline kinase whose activity has Concise description: cka-2 encodes an isoform of choline kinase whose activity has been verified in vitro; CKA-1 and CKA-2 comprise a related group ('A') of choline kinases; purified CKA-2 is dimeric, requires 1 mM Mg(2+) for optimal activity, and has a strong preference for choline over ethanolamine; CKA-2 has a pH optimum of
C52B9.1	WBGene00000510	cka-2	2883a28c-d59d-46de-8110-cc108fc4983b	6.68889	0	5.01666	1.67222	46.7669	20.1809	14.6511	11.935	0	0.34241	0.140111	0.34241	cka-2 encodes an isoform of choline kinase whose activity has Concise description: cka-2 encodes an isoform of choline kinase whose activity has been verified in vitro; CKA-1 and CKA-2 comprise a related group ('A') of choline kinases; purified CKA-2 is dimeric, requires 1 mM Mg(2+) for optimal activity, and has a strong preference for choline over ethanolamine; CKA-2 has a pH optimum of
C52B9.9	WBGene00003179	mec-18	6144af4e-a3ff-4738-bfd5-5ca71f250650	1.99008	0	1.99008	0	10.6138	1.1056	9.50817	0	0	0.209302		0.209302	mec-18 encodes a protein similar to firefly luciferase and Concise description: mec-18 encodes a protein similar to firefly luciferase and plant protein 4-coumarate coA ligase; mec-18 is involved in sensory mechanotransduction; genetic interactions with other mec genes suggest that mec-18 may be involved in negative regulation of the degenerin channel in the touch receptor neurons; mec-18
C52B9.9	WBGene00003179	mec-18	b9eb9c27-fb31-4eaf-9aca-587af0dc0ffb	2.18909	0	2.18909	0	10.6138	1.1056	9.50817	0	0	0.230233		0.230233	mec-18 encodes a protein similar to firefly luciferase and Concise description: mec-18 encodes a protein similar to firefly luciferase and plant protein 4-coumarate coA ligase; mec-18 is involved in sensory mechanotransduction; genetic interactions with other mec genes suggest that mec-18 may be involved in negative regulation of the degenerin channel in the touch receptor neurons; mec-18
C52B9.9	WBGene00003179	mec-18	e29cf91a-4c20-464f-a98a-d7cce5b9dc5c	3.3168	1.1056	2.2112	0	10.6138	1.1056	9.50817	0	1	0.232558		-0.767442	mec-18 encodes a protein similar to firefly luciferase and Concise description: mec-18 encodes a protein similar to firefly luciferase and plant protein 4-coumarate coA ligase; mec-18 is involved in sensory mechanotransduction; genetic interactions with other mec genes suggest that mec-18 may be involved in negative regulation of the degenerin channel in the touch receptor neurons; mec-18
C52D10.12	WBGene00016879	cnnm-1	d0f2e27b-b519-4873-ad16-e84d9395278a	35.6094	10.7907	15.107	9.71165	58.0893	23.5251	19.4837	15.0805	0.45869	0.775365	0.643989	0.316675	C52D10.12 encodes a predicted transmembrane protein orthologous Concise description: C52D10.12 encodes a predicted transmembrane protein orthologous to human ACDP1-ACDP4 and S. cerevisiae MAM3, and paralogous to C01H6.6, C33D12.2, M02F4.3, R04E5.2, and R13G10.4; by orthology with MAM3, C52D10.12 may participate in metal homoeostasis; C52D10.12, MAM3, and ACDP1-ACDP4 belong to a family of proteins…
C52D10.6	WBGene00004818	skr-12	C52D10.6.1	89.898	88.1353	0	1.76271	190.704	186.664	0.427426	3.61173	0.472159	0	0.48805	-0.472159	skr-12 encodes a homolog of Skp1 in S. cerevisiae, a core component Concise description: skr-12 encodes a homolog of Skp1 in S. cerevisiae, a core component of the SCF (Skp1p, Cullin, F-box) ubiquitin-ligase complex that facilitates ubiquitin-mediated protein degradation; SKR-12 has no known function in vivo, since skr-12(RNAi) animals
C52D10.6	WBGene00004818	skr-12	a8149b9d-60c0-4679-9d08-a5c5cf148e57	12.3954	11.5405	0.427426	0.427426	190.704	186.664	0.427426	3.61173	0.0618249	1	0.118344	0.938175	skr-12 encodes a homolog of Skp1 in S. cerevisiae, a core component Concise description: skr-12 encodes a homolog of Skp1 in S. cerevisiae, a core component of the SCF (Skp1p, Cullin, F-box) ubiquitin-ligase complex that facilitates ubiquitin-mediated protein degradation; SKR-12 has no known function in vivo, since skr-12(RNAi) animals
C52D10.6	WBGene00004818	skr-12	C52D10.6.2	61.3735	60.1932	0	1.18026	190.704	186.664	0.427426	3.61173	0.322468	0	0.326785	-0.322468	skr-12 encodes a homolog of Skp1 in S. cerevisiae, a core component Concise description: skr-12 encodes a homolog of Skp1 in S. cerevisiae, a core component of the SCF (Skp1p, Cullin, F-box) ubiquitin-ligase complex that facilitates ubiquitin-mediated protein degradation; SKR-12 has no known function in vivo, since skr-12(RNAi) animals
C52D10.8	WBGene00004819	skr-13	C52D10.8.1	78.5672	76.7815	0	1.78562	261.958	255.111	0.843596	6.00359	0.300973	0	0.297425	-0.300973	The skr-13 gene encodes a homolog of Skp1 in S. cerevisiae Concise description: The skr-13 gene encodes a homolog of Skp1 in S. cerevisiae that has no known function in vivo, since skr-13(RNAi) animals are at least superficially
C52D10.8	WBGene00004819	skr-13	85fb5dba-e455-4d58-90d3-1f6079f3a14e	162.814	157.752	0.843596	4.21798	261.958	255.111	0.843596	6.00359	0.618368	1	0.702575	0.381632	The skr-13 gene encodes a homolog of Skp1 in S. cerevisiae Concise description: The skr-13 gene encodes a homolog of Skp1 in S. cerevisiae that has no known function in vivo, since skr-13(RNAi) animals are at least superficially
C53A5.13	WBGene00008270	C53A5.13	efa9411e-c72d-4058-9d2c-7ecf83e3959e	9.28705	0	9.28705	0	43.1184	1.80081	30.8832	10.4344	0	0.300715	0	0.300715	none available
C53B4.4	WBGene00008274	C53B4.4	1431b3ab-dc12-4250-972d-2abb84ae2164	1.99008	0	1.99008	0	27.8611	4.8141	8.51155	14.5355	0	0.23381	0	0.23381	none available
C53B4.4	WBGene00008274	C53B4.4	d0a57227-c780-4dc8-85fe-7f4785d3e331	1.32672	1.32672	0	0	27.8611	4.8141	8.51155	14.5355	0.275591	0	0	-0.275591	none available
C53B7.3	WBGene00016894	C53B7.3	df835f37-f9bd-401b-ab71-3f3823262651	158.672	2.00851	142.604	14.0596	894.012	4.30319	755.857	133.852	0.46675	0.188666	0.105038	-0.278084	none available
C53C11.3	WBGene00004220	ptr-5	aa984e69-9ca7-4b1f-ac5e-cfbf05a15339	1.32672	1.32672	0	0	5.30688	2.65344	2.65344	0	0.5	0		-0.5	ptr-5 encodes a nematode-specific member of the sterol sensing Concise description: ptr-5 encodes a nematode-specific member of the sterol sensing domain (SSD) proteins, distantly paralogous to Drosophila PATCHED (PTC) and human PTCH (OMIM:601309, mutated in basal cell nevus syndrome); PTR-5 is weakly required for normal molting from L4 to adult stages; PTR-5 is also required for normal growth to…
C53C11.3	WBGene00004220	ptr-5	1dd700dd-59ba-48e1-b03b-52399c1d5700	3.98016	1.32672	2.65344	0	5.30688	2.65344	2.65344	0	0.5	1		0.5	ptr-5 encodes a nematode-specific member of the sterol sensing Concise description: ptr-5 encodes a nematode-specific member of the sterol sensing domain (SSD) proteins, distantly paralogous to Drosophila PATCHED (PTC) and human PTCH (OMIM:601309, mutated in basal cell nevus syndrome); PTR-5 is weakly required for normal molting from L4 to adult stages; PTR-5 is also required for normal growth to…
C53C11.5	WBGene00044770	C53C11.5	775e5fef-a3af-42b9-bb75-be2a265fef94	3.80327	2.28196	0.760653	0.760653	22.5543	14.909	2.04841	5.59685	0.153059	0.371339	0.135908	0.21828	none available
C53H9.4	WBGene00303070	C53H9.4	566f4b6d-c7a2-4020-9bec-02e41be3e0d1	2.65344	0	2.65344	0	14.5939	10.6967	2.65344	1.2438	0	1	0	1	none available
C53H9.4	WBGene00303070	C53H9.4	58821295-4ee0-4a12-8092-51b16d05e1b9	9.95041	8.70661	0	1.2438	14.5939	10.6967	2.65344	1.2438	0.813953	0	1	-0.813953	none available
C54C8.4	WBGene00008292	C54C8.4	e5cb8408-3aff-4496-bc0d-ba2e9843875b	0.663361	0.663361	0	0	2.65344	1.32672	1.32672	0	0.5	0		-0.5	none available
C54C8.4	WBGene00008292	C54C8.4	f276802a-b397-4fec-989e-f8e2532f6474	0.663361	0	0.663361	0	2.65344	1.32672	1.32672	0	0	0.5		0.5	none available
C54D1.6	WBGene00000238	bar-1	c2fc815f-bd3a-46d0-a3c5-6ae85efba4a4	2.65344	2.65344	0	0	41.1284	12.8158	14.3267	13.9859	0.207045	0	0	-0.207045	bar-1 encodes a beta-catenin; during C. elegans development, Concise description: bar-1 encodes a beta-catenin; during C. elegans development, BAR-1 likely functions as a transcriptional coactivator whose activity is required for Q neuroblast migration, P12 cell fate specification, and P3.p through P8.p vulval cell fate specification at two different stages of development; in specifying vulval ce…
C54D10.3	WBGene00008298	C54D10.3	f0440c71-fc94-455c-bd06-58f62babff60	388.163	0.892328	290.007	97.2638	1074.21	1.58259	868.716	203.398	0.563839	0.333834	0.478194	-0.230006	none available
C54D10.3	WBGene00008298	C54D10.3	C54D10.3.1	189.823	0.690265	142.885	46.2478	1074.21	1.58259	868.716	203.398	0.436161	0.164478	0.227376	-0.271683	none available
C54D2.2	WBGene00016916	C54D2.2	92fcf891-ab43-482f-bb13-c38422a71484	32.9469	0.998391	24.9598	6.98874	39.3594	0.998391	31.3723	6.98874	1	0.7956	1	-0.2044	none available
C54F6.14	WBGene00001500	ftn-1	60176003-e80a-4b6d-9551-ef40ae677533	16.8841	2.41201	13.2661	1.20601	129.564	6.65496	112.118	10.7905	0.362439	0.118322	0.111766	-0.244117	ftn-1 encodes one of two C. elegans ferritin heavy chain homologs; Concise description: ftn-1 encodes one of two C. elegans ferritin heavy chain homologs; ftn-1 activity is essential for normal lifespan under iron stress conditions and, in addition, has been reported to be essential for embryogenesis; an ftn-1::gfp reporter is expressed in the intestine at all stages of development and its expres…
C54F6.14	WBGene00001500	ftn-1	24938eef-cf11-4c11-a032-643d3feb6cf1	58.0567	1.23525	53.1157	3.70575	129.564	6.65496	112.118	10.7905	0.185613	0.473747	0.343427	0.288133	ftn-1 encodes one of two C. elegans ferritin heavy chain homologs; Concise description: ftn-1 encodes one of two C. elegans ferritin heavy chain homologs; ftn-1 activity is essential for normal lifespan under iron stress conditions and, in addition, has been reported to be essential for embryogenesis; an ftn-1::gfp reporter is expressed in the intestine at all stages of development and its expres…
C54G4.4	WBGene00008314	C54G4.4	35366d68-aca2-4784-a650-af19d67b3e81	3.3168	2.4876	0.829201	0	15.9207	12.7998	1.97501	1.1458	0.194346	0.419847	0	0.225501	none available
C54G4.4	WBGene00008314	C54G4.4	d57ad3ee-4b73-4acd-a6f1-b524a668cb78	12.6038	10.3122	1.1458	1.1458	15.9207	12.7998	1.97501	1.1458	0.805654	0.580153	1	-0.225501	none available
C54G4.5	WBGene00008315	C54G4.5	6356329f-c184-46ac-b8a2-9324e27bb0bb	3.98016	0	3.98016	0	34.4947	2.2112	18.2645	14.019	0	0.217918	0	0.217918	none available
C54G4.5	WBGene00008315	C54G4.5	17cb841d-288f-4771-a2b1-4db0acb91eeb	21.0064	2.2112	8.84481	9.95041	34.4947	2.2112	18.2645	14.019	1	0.484262	0.709779	-0.515738	none available
C54G4.9	WBGene00008318	C54G4.9	0fa1d60c-4482-45d4-92ed-e9d615e406ba	87.1292	32.948	7.32179	46.8594	117.486	50.8262	7.58296	59.0767	0.648249	0.965558	0.793196	0.317309	none available
C54G6.1	WBGene00016930	madf-6	975394b5-8bfa-4d1f-8ed0-f6674c4381ac	40.465	11.5614	2.31229	26.5913	53.0688	15.4906	2.31229	35.266	0.746353	1	0.75402	0.253647	none available
C54G6.5	WBGene00005002	spp-17	04e874db-3a96-4959-abda-9b8cf1729f0c	421.265	0.560939	4.48751	416.216	1407.79	1.25588	20.615	1385.92	0.446651	0.217682	0.300318	-0.22897	none available
C54G6.5	WBGene00005002	spp-17	C54G6.5.2	170.092	0.336816	1.01045	168.745	1407.79	1.25588	20.615	1385.92	0.268192	0.0490152	0.121757	-0.219177	none available
C54G6.5	WBGene00005002	spp-17	75240987-a02c-4bae-bce0-108a92c79845	208.068	0.358121	1.43248	206.278	1407.79	1.25588	20.615	1385.92	0.285156	0.0694874	0.148838	-0.215669	none available
C54G6.5	WBGene00005002	spp-17	a3317645-e6e2-4894-80d9-664306f699b9	309.035	0	7.04639	301.988	1407.79	1.25588	20.615	1385.92	0	0.341809	0.217897	0.341809	none available
C54G7.4	WBGene00016935	ifta-1	c325cb78-f25b-431c-9068-9d24ccd3f8ac	9.40766	8.36236	1.0453	0	16.4634	13.3677	1.0453	2.05039	0.625564	1	0	0.374436	ifta-1 encodes a evolutionarily conserved protein found in Concise description: ifta-1 encodes a evolutionarily conserved protein found in ciliated unicellular and multicellular organisms including humans and is absent in non-ciliated organisms like yeast; IFTA-1 contains a X-box and several N-terminal WD repeats; ifta-1 is required for retrograde intraflagellar transport and likely associates wi…
C55A6.10	WBGene00008339	C55A6.10	c41ad458-825e-4d93-a6a0-872dab816a1d	51.0788	16.6006	11.4927	22.9854	67.6628	29.5914	13.4275	24.6438	0.560994	0.855908	0.932705	0.294914	none available
C55A6.10	WBGene00008339	C55A6.10	2d5e239a-127b-4437-938e-f726ae41801f	5.97024	5.97024	0	0	67.6628	29.5914	13.4275	24.6438	0.201756	0	0	-0.201756	none available
C55A6.11	WBGene00008340	C55A6.11	81b3e59b-b49f-4ac1-90a8-5e9618310d45	2.65344	0.663361	0.663361	1.32672	11.9405	3.75904	1.69525	6.48619	0.176471	0.391304	0.204545	0.214834	none available
C55A6.11	WBGene00008340	C55A6.11	b43a473d-e9fe-4f7e-95f0-ab02865a5272	9.28705	3.09568	1.03189	5.15947	11.9405	3.75904	1.69525	6.48619	0.823529	0.608696	0.795455	-0.214834	none available
C55A6.6	WBGene00008335	C55A6.6	97819468-d569-4385-b2b4-13483cc68277	1.99008	1.99008	0	0	63.0192	8.23247	39.4444	15.3423	0.241736	0	0	-0.241736	none available
C55B6.1	WBGene00016939	C55B6.1	C55B6.1a.1	8.44679	6.45931	1.49061	0.49687	22.2889	16.8667	1.91811	3.5041	0.382962	0.777125	0.141797	0.394162	none available
C55F2.1	WBGene00016957	atic-1	d258584b-136e-4e24-8e5f-c6e7c7d1dcc1	22.5543	1.32672	9.28705	11.9405	34.4947	1.32672	13.2672	19.9008	1	0.7	0.6	-0.3	none available
C55F2.1	WBGene00016957	atic-1	df51dfa3-ad88-4b0e-800c-f47e4e2d9378	3.98016	0	3.98016	0	34.4947	1.32672	13.2672	19.9008	0	0.3	0	0.3	none available
C55F2.2	WBGene00016958	ilys-4	0fc0d404-3561-4784-aa7d-795fb79f5e63	49.3098	24.0227	11.3792	13.9079	86.2369	29.9222	36.2596	20.055	0.802839	0.313825	0.693486	-0.489014	none available
C55F2.2	WBGene00016958	ilys-4	1091bde3-8130-4af9-94b5-6bd7d0ed58ba	30.7357	3.68828	20.9003	6.14714	86.2369	29.9222	36.2596	20.055	0.123262	0.576406	0.306514	0.453144	none available
C56A3.5	WBGene00008344	C56A3.5	C56A3.5.2	67.7958	22.164	18.2527	27.3791	141.605	66.2698	31.5083	43.8269	0.334451	0.579298	0.624709	0.244848	none available
C56A3.7	WBGene00000302	cav-2	C56A3.7a.1	10.6138	8.62369	1.99008	0	39.5594	18.9033	10.9862	9.6699	0.4562	0.181143	0	-0.275057	cav-2 encodes one of two C. elegans proteins related to caveolins, Concise description: cav-2 encodes one of two C. elegans proteins related to caveolins, integral transmembrane proteins that are believed to function in regulation of signal transduction and that are the major component of caveolae, specialized lipid rafts found in the plasma membrane of most cell types; as loss of cav-2 function …
C56C10.4	WBGene00016962	C56C10.4	C56C10.4.1	12.6038	11.5535	0	1.05032	49.752	46.4239	1.30829	2.01985	0.24887	0	0.52	-0.24887	none available
C56C10.4	WBGene00016962	C56C10.4	fb9b925b-ca9d-4585-a7b2-a973aea11176	12.6038	11.6343	0	0.969527	49.752	46.4239	1.30829	2.01985	0.250611	0	0.48	-0.250611	none available
C56C10.4	WBGene00016962	C56C10.4	4afb5f18-01c4-4b60-83e6-c9271b4433d5	3.64848	3.0404	0.60808	0	49.752	46.4239	1.30829	2.01985	0.0654922	0.464789	0	0.399297	none available
C56C10.4	WBGene00016962	C56C10.4	4c87a39a-b3c5-4145-8607-e6f1b50befb1	6.30192	5.60171	0.700214	0	49.752	46.4239	1.30829	2.01985	0.120664	0.535211	0	0.414547	none available
C56C10.9	WBGene00016965	C56C10.9	C56C10.9.1	17.2474	4.10652	4.10652	9.03434	41.7033	14.1056	7.15711	19.9983	0.291127	0.573767	0.451755	0.28264	none available
C56G2.15	WBGene00016983	C56G2.15	C56G2.15.1	51.7421	25.2077	6.63361	19.9008	76.9498	36.5512	6.63361	33.765	0.689655	1	0.589391	0.310345	none available
C56G2.15	WBGene00016983	C56G2.15	450afaa5-d556-42eb-b90c-e013c135c6b6	25.2077	11.3435	0	13.8642	76.9498	36.5512	6.63361	33.765	0.310345	0	0.410609	-0.310345	none available
C56G2.5	WBGene00016980	C56G2.5	2e8a720d-543a-4527-9815-87603b6a70bd	10.7686	3.36517	1.34607	6.05731	47.9389	23.0467	2.15201	22.7402	0.146016	0.625493	0.266371	0.479477	none available
C56G7.3	WBGene00008348	C56G7.3	C56G7.3a.1	30.5146	15.2573	5.54811	9.70919	71.6429	21.9974	12.9773	36.6682	0.693595	0.427524	0.264785	-0.266071	none available
C56G7.3	WBGene00008348	C56G7.3	4de0c802-a7ca-4427-b0e0-88ac8000310b	24.4496	3.4928	5.82133	15.1354	71.6429	21.9974	12.9773	36.6682	0.158782	0.448578	0.412767	0.289796	none available
CC4.2	WBGene00003753	nlp-15	dcdea1b3-986e-4a85-bf94-da6db613a983	243.724	9.94793	211.394	22.3828	339.591	19.0257	289.033	31.5323	0.522869	0.731383	0.709839	0.208514	none available
CD4.1	WBGene00016988	CD4.1	966194f0-9b74-4645-914b-bd0ac2f3b2ec	7.90505	0	6.14837	1.75668	36.9823	4.03309	24.9916	7.95761	0	0.246017	0.220754	0.246017	none available
CD4.10	WBGene00022970	CD4.10	86141333-f67e-43e9-b33b-0a19c3ee6020	49.4404	0.867375	2.60212	45.9709	81.507	0.867375	4.44916	76.1905	1	0.584858	0.603368	-0.415142	none available
CD4.8	WBGene00016993	CD4.8	a17d827a-2b2d-49ad-ac9e-244001d222c3	12.6038	6.30192	1.26038	5.04154	18.5741	10.061	3.47159	5.04154	0.626374	0.363057	1	-0.263316	none available
CD4.8	WBGene00016993	CD4.8	50bc9cb7-eedd-4615-9236-d9b71a753b2d	3.3168	1.1056	2.2112	0	18.5741	10.061	3.47159	5.04154	0.10989	0.636943	0	0.527053	none available
CD4.8	WBGene00016993	CD4.8	e1b5f2f5-f902-4267-8de9-afa6f82c8489	2.65344	2.65344	0	0	18.5741	10.061	3.47159	5.04154	0.263736	0	0	-0.263736	none available
cTel54X.1	WBGene00008352	fbxa-6	963504c2-ba10-401e-8b3b-10c25cc290c8	28.7472	5.74944	14.9485	8.04922	36.2621	10.1562	18.0567	8.04922	0.566101	0.827867	1	0.261766	This gene encodes a protein containing an F-box, a motif predicted Concise description: This gene encodes a protein containing an F-box, a motif predicted to mediate protein-protein interactions either with homologs of yeast Skp-1p or with other proteins; this gene's encoded protein also contains an FTH/DUF38 motif,
D1005.2	WBGene00016996	D1005.2	16d2ffcc-ff59-479c-a50e-e3bc35f1595a	39.1383	32.6152	5.21844	1.30461	58.3757	43.9808	11.8963	2.49866	0.741579	0.438662	0.522124	-0.302917	none available
D1005.3	WBGene00016997	cebp-1	a4a2507d-d8fe-424e-85d2-01e160e5c077	63.8453	29.5404	23.8229	10.4821	86.5796	46.2216	28.2316	12.1263	0.639102	0.843836	0.864407	0.204733	cebp-1 encodes a bZip domain-containing protein that is a member Concise description: cebp-1 encodes a bZip domain-containing protein that is a member of the CCAAT/enhancer-binding proteins (C/EBP) subfamily of bZip proteins; in C. elegans, CEBP-1 functions together with a DLK-1 signaling pathway to effect axon regeneration after laser axotomy in adult neurons; cebp-1 protein and mRNA are located…
D1007.13	WBGene00017009	D1007.13	1f0ff0bd-f358-4aec-94d5-50abd74cfe38	1.6584	1.6584	0	0	4.9752	3.98016	0.995041	0	0.416667	0		-0.416667	none available
D1007.13	WBGene00017009	D1007.13	984b704d-db7b-46cd-9d4f-60daff9db97d	2.98512	1.99008	0.995041	0	4.9752	3.98016	0.995041	0	0.5	1		0.5	none available
D1007.18	WBGene00044421	D1007.18	6fc20e16-5211-4171-8cd6-f35c0b0d6f73	22.6332	0.984053	21.6492	0	38.7276	0.984053	37.0289	0.714692	1	0.584657	0	-0.415343	none available
D1009.3	WBGene00017013	ensh-1	b350e935-1b75-4adf-b949-66288ebccad0	7.96033	6.63361	1.32672	0	10.6138	7.96033	2.65344	0	0.833333	0.5		-0.333333	none available
D1009.3	WBGene00017013	ensh-1	94a0a076-1513-4355-9a12-1ca1680644ab	2.65344	1.32672	1.32672	0	10.6138	7.96033	2.65344	0	0.166667	0.5		0.333333	none available
D1014.1	WBGene00006309	sul-2	b9496305-91d3-437c-acae-dcab91aed914	5.30688	3.98016	1.32672	0	33.168	9.68743	23.4806	0	0.410858	0.0565029		-0.354356	sul-2 is orthologous to the human gene ARYLSULFATASE A (ARSA; Concise description: sul-2 is orthologous to the human gene ARYLSULFATASE A (ARSA;
D1014.13	WBGene00303233	D1014.13	72ad8d0b-358a-4165-8d0c-a87e616a12da	2.97662	1.19065	1.19065	0.595324	30.5146	1.76471	7.35839	21.3915	0.674699	0.161808	0.0278299	-0.512891	none available
D1014.13	WBGene00303233	D1014.13	4f20b8b7-17a8-4869-a1f7-9b1e57887bb7	20.224	0	2.24711	17.9769	30.5146	1.76471	7.35839	21.3915	0	0.305381	0.840375	0.305381	none available
D1014.2	WBGene00017015	D1014.2	D1014.2.1	1.32672	0.663361	0	0.663361	3.98016	1.6584	1.6584	0.663361	0.4	0	1	-0.4	none available
D1014.2	WBGene00017015	D1014.2	da01f890-8297-4d3b-b9ff-309b35b7347d	0.663361	0	0.663361	0	3.98016	1.6584	1.6584	0.663361	0	0.4	0	0.4	none available
D1022.8	WBGene00000280	cah-2	4fe74c73-ca96-4524-a4a8-6f27602b926c	13.8437	3.1947	8.5192	2.1298	36.6507	12.2232	18.3479	6.07949	0.261363	0.464314	0.350325	0.202951	cah-2 encodes a predicted carbonic anhydrase.
D1025.2	WBGene00008354	gcsh-1	4d5d70e6-4305-4473-b798-91b3a6da8247	69.2106	4.87399	1.94959	62.387	93.5338	6.18302	4.00454	83.3463	0.788286	0.486846	0.748528	-0.30144	none available
D1025.2	WBGene00008354	gcsh-1	cc317dcd-e176-4841-bb67-abdacce5c1ad	3.53792	0	0.884481	2.65344	93.5338	6.18302	4.00454	83.3463	0	0.22087	0.0318364	0.22087	none available
D1044.1	WBGene00017027	D1044.1	D1044.1.1	23.881	11.9405	0	11.9405	39.1383	24.1084	1.06138	13.9685	0.495283	0	0.854817	-0.495283	none available
D1044.1	WBGene00017027	D1044.1	38c9dd32-2fd0-438e-bb24-ee483071d694	4.24551	3.18413	1.06138	0	39.1383	24.1084	1.06138	13.9685	0.132075	1	0	0.867925	none available
D1044.3	WBGene00004114	pqn-25	D1044.3.1	9.28705	1.32672	1.32672	6.63361	25.2519	3.3623	13.5079	8.38173	0.394587	0.0982182	0.791436	-0.296369	The protein product of this gene is predicted to contain a Concise description: The protein product of this gene is predicted to contain a glutamine/asparagine (Q/N)-rich ('prion') domain, by the algorithm of Michelitsch
D1046.1	WBGene00008362	cfim-2	c38902a9-a161-4da7-9695-bfcc12273c1a	8.79208	5.12871	1.46535	2.19802	107.464	79.9083	4.69865	22.8574	0.0641824	0.311866	0.0961622	0.247683	D1046.1 encodes a putative cleavage and polyadenylation specificity Concise description: D1046.1 encodes a putative cleavage and polyadenylation specificity factor, orthologous to human CPSF6 (OMIM:604979) and CPSF7, that is required for normal locomotion and fertility; D1046.1 is expressed in many, if not all, somatic tissues of larvae and adults; D1046.1(RNAi) has no obvious synthetic phenotype
D1046.1	WBGene00008362	cfim-2	35a3575d-d2b0-4a4f-934c-c0c139f67f60	20.7326	8.88539	1.97453	9.87265	107.464	79.9083	4.69865	22.8574	0.111195	0.420234	0.431923	0.309039	D1046.1 encodes a putative cleavage and polyadenylation specificity Concise description: D1046.1 encodes a putative cleavage and polyadenylation specificity factor, orthologous to human CPSF6 (OMIM:604979) and CPSF7, that is required for normal locomotion and fertility; D1046.1 is expressed in many, if not all, somatic tissues of larvae and adults; D1046.1(RNAi) has no obvious synthetic phenotype
D1046.1	WBGene00008362	cfim-2	74d1c45a-409b-4e4c-9c12-3bff401606d7	21.9588	17.1553	0	4.80348	107.464	79.9083	4.69865	22.8574	0.214687	0	0.21015	-0.214687	D1046.1 encodes a putative cleavage and polyadenylation specificity Concise description: D1046.1 encodes a putative cleavage and polyadenylation specificity factor, orthologous to human CPSF6 (OMIM:604979) and CPSF7, that is required for normal locomotion and fertility; D1046.1 is expressed in many, if not all, somatic tissues of larvae and adults; D1046.1(RNAi) has no obvious synthetic phenotype
D1046.17	WBGene00219575	anr-8	05b0ff7d-d5ef-44c3-a67f-ed1ef3154691	7.40753	3.17465	3.17465	1.05822	13.2672	6.43986	4.47189	2.35546	0.492969	0.709913	0.449262	0.216944	none available
D1053.1	WBGene00001790	gst-42	D1053.1.1	76.9498	24.2999	13.5	39.1499	136.684	58.9313	20.6948	57.0578	0.412344	0.652338	0.686145	0.239994	gst-42 is orthologous to the human gene GLUTATHIONE TRANSFERASE Concise description: gst-42 is orthologous to the human gene GLUTATHIONE TRANSFERASE ZETA-1 (also known as MALEYLACETOACETATE ISOMERASE; GSTZ1; OMIM:603758), which when
D1053.4	WBGene00008369	D1053.4	df73d4a9-2c4e-4553-a903-cb9a15a52368	9.61873	9.61873	0	0	61.9136	43.1532	11.0171	7.7433	0.222897	0	0	-0.222897	none available
D1053.4	WBGene00008369	D1053.4	c480e7e1-2417-4e37-add3-3b0b2aeee044	13.2672	2.65344	3.98016	6.63361	61.9136	43.1532	11.0171	7.7433	0.0614888	0.361271	0.85669	0.299782	none available
D1054.2	WBGene00003923	pas-2	d31cc1e4-7bc1-4bda-a7ab-44ce2c89afe9	519.066	69.0445	86.3056	363.716	1329.21	346.101	151.525	831.585	0.199492	0.56958	0.437377	0.370088	pas-2 encodes a proteasome subunit with highest similarity Concise description: pas-2 encodes a proteasome subunit with highest similarity
D1054.5	WBGene00008372	D1054.5	D1054.5.1	9.28705	0	5.90994	3.37711	11.9405	0.884481	7.6789	3.37711	0	0.769634	1	0.769634	none available
D1054.5	WBGene00008372	D1054.5	154e1666-ca6f-46a1-bb3a-77770a89b5d0	2.65344	0.884481	1.76896	0	11.9405	0.884481	7.6789	3.37711	1	0.230366	0	-0.769634	none available
D1054.9	WBGene00008376	D1054.9	D1054.9h.1	2.65344	1.32672	1.32672	0	37.4497	32.4616	4.98815	0	0.0408705	0.265975		0.225104	none available
D1065.6	WBGene00268212	D1065.6	2cb76a26-40a2-4206-8362-4b0a21dcdcaa	1.32672	1.32672	0	0	6.85473	5.30688	0.773921	0.773921	0.25	0	0	-0.25	none available
D1065.6	WBGene00268212	D1065.6	532bf810-f89c-4a05-bcc1-de0ebc24f58b	2.43232	2.43232	0	0	6.85473	5.30688	0.773921	0.773921	0.458333	0	0	-0.458333	none available
D1065.6	WBGene00268212	D1065.6	5ac17d07-c600-485f-a625-92474e66be97	3.09568	1.54784	0.773921	0.773921	6.85473	5.30688	0.773921	0.773921	0.291667	1	1	0.708333	none available
D1081.9	WBGene00008387	zhp-2	7a064dae-8dad-43e3-86ce-af7cf4351e2a	11.2771	3.22204	0.805509	7.24958	18.7952	4.7962	1.90585	12.0932	0.671789	0.422652	0.599478	-0.249137	D1081.9 encodes a RING finger/coiled-coil protein homologous Concise description: D1081.9 encodes a RING finger/coiled-coil protein homologous to budding yeast Cst9p/Zip3 (meiotically expressed) and human RNF212 (associated with varying recombination rate), RNF212B, and HEI10; D1081.9 is paralogous to F55A12.10, ZHP-3, and Y39B6A.16; D1081.9 is expressed during meiosis and required for normal lev…
D1086.4	WBGene00001864	him-5	1a112aff-82f7-4c65-927c-93d6ba6c0fe1	16.584	3.82708	3.82708	8.92985	35.8215	9.79732	6.14884	19.8753	0.390625	0.622407	0.449294	0.231782	him-5 was identified in screens for genes that when mutated Concise description: him-5 was identified in screens for genes that when mutated resulted in an increased frequency of X chromosome nondisjunction and thus, an increased frequency of genotypically XO males in self-fertile populations; him-5 functions in X chromosome dynamics by regulating the number and distribution of X chromosome
D2007.2	WBGene00017042	D2007.2	39317333-3940-49b0-ac8a-19f1d5352a43	3.53792	0.393103	1.96551	1.17931	16.3629	5.35251	6.26156	4.74882	0.0734426	0.313901	0.248337	0.240459	none available
D2013.3	WBGene00008403	csa-1	fe9b5ac7-2800-402a-b3a9-9ec15adcb293	2.65344	2.65344	0	0	13.2672	11.2771	1.99008	0	0.235294	0		-0.235294	none available
D2013.3	WBGene00008403	csa-1	86904c86-7bf8-4cb2-bb99-36b625010587	7.96033	5.97024	1.99008	0	13.2672	11.2771	1.99008	0	0.529412	1		0.470588	none available
D2021.4	WBGene00017048	D2021.4	85a3004c-083c-47b0-9e2c-bde0dcac890e	19.6797	6.1499	4.91992	8.60987	23.4387	6.59214	6.91001	9.93659	0.932914	0.712	0.866481	-0.220914	none available
D2024.2	WBGene00017051	afmd-1	D2024.2.1	5.30688	0	3.98016	1.32672	10.6138	2.2112	3.98016	4.4224	0	1	0.3	1	none available
D2024.2	WBGene00017051	afmd-1	66ecda94-a548-4a8b-859c-f86f2dfa72db	0.663361	0.663361	0	0	10.6138	2.2112	3.98016	4.4224	0.3	0	0	-0.3	none available
D2024.2	WBGene00017051	afmd-1	db7c9ce9-1016-440e-87e5-9fb7182814a3	4.64352	1.54784	0	3.09568	10.6138	2.2112	3.98016	4.4224	0.7	0	0.7	-0.7	none available
D2024.4	WBGene00017052	D2024.4	8228fda6-6dec-4b80-87a8-200f10bd2924	3.98016	3.18413	0.796033	0	8.62369	7.82765	0.796033	0	0.40678	1		0.59322	none available
D2024.4	WBGene00017052	D2024.4	294bd25a-564c-4f15-83cc-064c5191794a	2.65344	2.65344	0	0	8.62369	7.82765	0.796033	0	0.338983	0		-0.338983	none available
D2024.4	WBGene00017052	D2024.4	612f784c-a5c5-43ba-bca2-2f5fb40582fc	1.99008	1.99008	0	0	8.62369	7.82765	0.796033	0	0.254237	0		-0.254237	none available
D2030.10	WBGene00000084	aex-1	7eac08c5-a2ae-4c44-b71c-2f567da07f52	5.30688	3.98016	0	1.32672	9.28705	6.63361	1.32672	1.32672	0.6	0	1	-0.6	aex-1 encodes a novel, C2 calcium-binding domain protein that Concise description: aex-1 encodes a novel, C2 calcium-binding domain protein that is similar to human BAP3 proteins and rat Munc13; in C. elegans, AEX-1 functions in retrograde signaling to regulate presynaptic activity and localization of the synaptic vesicle fusion protein UNC-13; AEX-1 is required for the defecation motor program, …
D2030.10	WBGene00000084	aex-1	16d9b856-7828-4a41-8730-88a24be9f20d	2.65344	1.32672	1.32672	0	9.28705	6.63361	1.32672	1.32672	0.2	1	0	0.8	aex-1 encodes a novel, C2 calcium-binding domain protein that Concise description: aex-1 encodes a novel, C2 calcium-binding domain protein that is similar to human BAP3 proteins and rat Munc13; in C. elegans, AEX-1 functions in retrograde signaling to regulate presynaptic activity and localization of the synaptic vesicle fusion protein UNC-13; AEX-1 is required for the defecation motor program, …
D2030.12	WBGene00008421	D2030.12	cfa244d4-685b-4bbf-826d-867e50ffbb92	27.8296	3.79494	16.4447	7.58988	34.4947	6.65371	20.2512	7.58988	0.57035	0.812039	1	0.24169	none available
D2045.8	WBGene00008425	D2045.8	D2045.8.1	1.32672	0	1.32672	0	6.63361	1.32672	3.98016	1.32672	0	0.333333	0	0.333333	none available
D2045.8	WBGene00008425	D2045.8	09d013d6-8fd4-45bb-9e3c-a5cd852978a8	5.30688	1.32672	2.65344	1.32672	6.63361	1.32672	3.98016	1.32672	1	0.666667	1	-0.333333	none available
D2089.3	WBGene00008434	D2089.3	0d130846-2053-4493-979f-debc3213758a	25.4509	6.63937	17.705	1.10656	32.7037	11.4893	20.1078	1.10656	0.577876	0.880502	1	0.302627	none available
D2089.8	WBGene00271706	D2089.8	781f4a1e-e6f0-47c0-937d-f45e5ca85657	29.6964	18.9727	0.824901	9.89881	89.2662	49.6894	12.4443	27.1325	0.381827	0.0662874	0.364832	-0.315539	none available
D2089.8	WBGene00271706	D2089.8	D2089.8.1	50.7029	23.2388	11.6194	15.8446	89.2662	49.6894	12.4443	27.1325	0.467682	0.933713	0.583972	0.466031	none available
D2092.1	WBGene00017063	mctp-1	0e1e77eb-ff0d-4d92-a587-49bb6adf710c	3.82437	0.637396	2.54958	0.637396	23.881	0.637396	12.1643	11.0793	1	0.209596	0.0575304	-0.790404	none available
D2092.1	WBGene00017063	mctp-1	a8f913a3-d198-4e83-97f0-17dc23d0f7fd	7.3623	0	3.68115	3.68115	23.881	0.637396	12.1643	11.0793	0	0.302619	0.332255	0.302619	none available
D2092.6	WBGene00017067	D2092.6	33d6a3c9-a659-4e8c-b3ff-405e1d6c34bc	0.265344	0.265344	0	0	3.18413	1.06138	2.12275	0	0.25	0		-0.25	none available
D2092.6	WBGene00017067	D2092.6	d5bbd911-670b-4384-a5ce-aadba9a2303c	0.530688	0	0.530688	0	3.18413	1.06138	2.12275	0	0	0.25		0.25	none available
D2096.1	WBGene00017069	timm-17B.2	a98558ec-bdcc-449e-8507-70d2a0cbaf4e	15.0362	5.78314	1.15663	8.0964	57.7124	10.2735	6.36196	41.0769	0.562917	0.181804	0.197104	-0.381114	none available
D2096.1	WBGene00017069	timm-17B.2	f58d6609-628c-47b9-b20d-de0384c0de4b	4.86464	0.972929	1.94586	1.94586	57.7124	10.2735	6.36196	41.0769	0.0947026	0.305858	0.0473711	0.211156	none available
D2096.10	WBGene00017077	D2096.10	c845a2ed-2d1f-47d1-9c7d-8ffbc1b1b719	6.27034	0.570031	2.85015	2.85015	21.2275	1.07545	14.2285	5.92357	0.53004	0.200313	0.481154	-0.329727	none available
D2096.10	WBGene00017077	D2096.10	0ab6aa6a-d4cb-4482-9d1f-6deb98c3aea1	1.51625	0.505418	0.505418	0.505418	21.2275	1.07545	14.2285	5.92357	0.46996	0.0355215	0.0853231	-0.434438	none available
D2096.10	WBGene00017077	D2096.10	bab565f1-0861-4fd7-b7e9-7daf71f948a9	3.77168	0	3.23287	0.538811	21.2275	1.07545	14.2285	5.92357	0	0.22721	0.0909605	0.22721	none available
D2096.11	WBGene00017078	D2096.11	0ab6aa6a-d4cb-4482-9d1f-6deb98c3aea1	0.44224	0.44224	0	0	3.53792	1.99008	1.54784	0	0.222222	0		-0.222222	none available
D2096.11	WBGene00017078	D2096.11	62aabffc-5a74-4acb-86e5-52bb5d3cfb6d	3.09568	1.54784	1.54784	0	3.53792	1.99008	1.54784	0	0.777778	1		0.222222	none available
D2096.9	WBGene00017076	D2096.9	fa03e594-162f-4e98-ac80-e3917ad60a23	22.8196	1.03725	17.6333	4.14902	55.4569	7.4692	39.373	8.61476	0.138871	0.447854	0.481617	0.308983	none available
D2096.9	WBGene00017076	D2096.9	7dbe5b90-b3d0-42ac-96cb-a0b5bee599e0	26.7998	6.43194	18.2238	2.14398	55.4569	7.4692	39.373	8.61476	0.861129	0.462851	0.248873	-0.398278	none available
DC2.5	WBGene00017082	DC2.5	6be9dc8d-0c7a-42dc-8b3e-c45885a10af3	8.16249	2.44875	1.6325	4.08125	53.7512	3.76846	14.8461	35.1366	0.6498	0.109961	0.116154	-0.539838	none available
DC2.5	WBGene00017082	DC2.5	f7a5cb29-fdae-44f9-a3d9-b26dbebe0297	13.9116	0	4.63721	9.27441	53.7512	3.76846	14.8461	35.1366	0	0.312352	0.263953	0.312352	none available
E01G6.1	WBGene00008449	E01G6.1	a219839a-cbef-4228-8eb7-89919fcc9664	3.98016	2.65344	1.32672	0	13.9306	11.1916	2.73899	0	0.237093	0.484383		0.24729	none available
E01H11.1	WBGene00004033	pkc-2	3f57427a-eca1-485c-90e5-8806c7554c0c	2.65344	0	1.32672	1.32672	3.98016	1.32672	1.32672	1.32672	0	1	1	1	pkc-2 encodes protein kinases similar to the classical protein Concise description: pkc-2 encodes protein kinases similar to the classical protein kinase C family of Ca2+/diacylglycerol-stimulated kinases; when expressed in insect cells, one PKC-2 isoform exhibits Ca2+-dependent serine phosphorylation; PKC-2 isoforms are expressed in neurons, the intestine, muscles cells, and the somatic distal g…
E01H11.1	WBGene00004033	pkc-2	0139510c-7fab-44f2-8138-aabc6ea767cc	1.32672	1.32672	0	0	3.98016	1.32672	1.32672	1.32672	1	0	0	-1	pkc-2 encodes protein kinases similar to the classical protein Concise description: pkc-2 encodes protein kinases similar to the classical protein kinase C family of Ca2+/diacylglycerol-stimulated kinases; when expressed in insect cells, one PKC-2 isoform exhibits Ca2+-dependent serine phosphorylation; PKC-2 isoforms are expressed in neurons, the intestine, muscles cells, and the somatic distal g…
E02A10.3	WBGene00008453	E02A10.3	26e25f28-4364-4524-a9fb-72d53c7192f9	5.97024	0.995041	4.9752	0	25.2077	7.93481	15.1297	2.14316	0.125402	0.328836	0	0.203434	none available
E02A10.4	WBGene00008454	E02A10.4	E02A10.4.1	13.2672	1.32672	9.28705	2.65344	61.6925	3.22835	48.2042	10.26	0.410959	0.192661	0.258621	-0.218298	none available
E02C12.5	WBGene00001665	gpa-3	e89e7d37-db90-41d3-8f91-5904daaf889b	14.5939	6.48619	8.10774	0	20.5642	6.48619	13.4146	0.663361	1	0.604396	0	-0.395604	gpa-3 encodes a member of the G protein alpha subunit family Concise description: gpa-3 encodes a member of the G protein alpha subunit family of heterotrimeric GTPases that affects dauer formation, water-soluble chemoattraction and chemoaversion, and volatile chemoattraction; it is expressed in amphid and phasmid
E02H4.1	WBGene00000952	del-1	bad57613-713a-4ef5-a0d2-29588692604e	1.99008	0.995041	0.995041	0	2.65344	0.995041	1.6584	0	1	0.6		-0.4	del-1 encodes an ion channel protein of the DEG/ENaC (degenerin/epithelial Concise description: del-1 encodes an ion channel protein of the DEG/ENaC (degenerin/epithelial Na+ channel) family; like other members of the degenerin family, DEL-1 is predicted to function as a sensory mechanotransduction channel, however detailed analysis of the DEL-1 mutant phenotype has not yet been reported; DEL-1 i…
E02H4.1	WBGene00000952	del-1	a6e6fd66-050c-4446-a353-33f3f5508042	0.663361	0	0.663361	0	2.65344	0.995041	1.6584	0	0	0.4		0.4	del-1 encodes an ion channel protein of the DEG/ENaC (degenerin/epithelial Concise description: del-1 encodes an ion channel protein of the DEG/ENaC (degenerin/epithelial Na+ channel) family; like other members of the degenerin family, DEL-1 is predicted to function as a sensory mechanotransduction channel, however detailed analysis of the DEL-1 mutant phenotype has not yet been reported; DEL-1 i…
E02H4.4	WBGene00008462	E02H4.4	ea026e61-f1bb-434a-ae36-df7da61191bc	5.30688	5.30688	0	0	6.63361	5.30688	1.32672	0	1	0		-1	none available
E02H4.4	WBGene00008462	E02H4.4	83b33405-ab02-450f-bfa4-9051222cf88c	1.32672	0	1.32672	0	6.63361	5.30688	1.32672	0	0	1		1	none available
E02H4.6	WBGene00008464	E02H4.6	fdfd8da7-0157-4c5c-aa74-175f81ba2461	59.0391	29.5195	1.96797	27.5516	78.9399	40.7967	1.96797	36.1753	0.723577	1	0.761614	0.276423	none available
E02H4.6	WBGene00008464	E02H4.6	E02H4.6.1	19.9008	11.2771	0	8.62369	78.9399	40.7967	1.96797	36.1753	0.276423	0	0.238386	-0.276423	none available
E02H9.10	WBGene00219669	anr-28	39e25df6-c510-4bec-81e6-e8e15150ca03	5.74912	5.74912	0	0	19.2375	17.6324	1.6051	0	0.326055	0		-0.326055	none available
E02H9.10	WBGene00219669	anr-28	24187b33-7d66-4e0d-bd59-d7644ce3b0b1	7.40753	6.48158	0.925941	0	19.2375	17.6324	1.6051	0	0.367596	0.576876		0.20928	none available
E02H9.11	WBGene00219670	anr-26	39e25df6-c510-4bec-81e6-e8e15150ca03	3.75904	3.75904	0	0	15.589	14.0786	1.51033	0	0.267003	0		-0.267003	none available
E02H9.3	WBGene00017101	E02H9.3	94d8ab75-6ab9-47a8-ab92-9d5d02af2843	51.0988	3.71627	2.78721	44.5953	88.5165	9.40652	4.07012	75.0399	0.395074	0.684797	0.594288	0.289722	none available
E02H9.8	WBGene00003711	nhr-121	497a1c0b-a45f-4649-831b-84cc38cbd4d9	11.2771	2.65344	1.32672	7.29697	12.6038	3.98016	1.32672	7.29697	0.666667	1	1	0.333333	none available
E03D2.1	WBGene00003751	nlp-13	4bf4d48c-320d-44c8-82ef-f12c5e6ed4aa	63.163	4.51164	53.0118	5.63955	164.149	7.35806	135.282	21.066	0.613156	0.391861	0.267708	-0.221296	nlp-13 encodes a predicted neuropeptide of the MSFamide family; Concise description: nlp-13 encodes a predicted neuropeptide of the MSFamide family; expressed primarily in neurons or in the endocrine/secretory cells, and expression
E03G2.4	WBGene00000759	col-186	E03G2.4.1	0.663361	0	0.663361	0	18.1319	2.46918	1.99008	13.6726	0	0.333333	0	0.333333	none available
E03G2.4	WBGene00000759	col-186	26fea3d7-6faf-4aab-83ee-7bc91d920651	1.1056	0.5528	0	0.5528	18.1319	2.46918	1.99008	13.6726	0.223881	0	0.0404313	-0.223881	none available
E03G2.4	WBGene00000759	col-186	92ca11f9-7f6f-4959-8241-c93935c91187	1.76896	0.589654	0	1.17931	18.1319	2.46918	1.99008	13.6726	0.238806	0	0.0862534	-0.238806	none available
E04F6.6	WBGene00017126	E04F6.6	b7339cab-9042-44a8-8610-3f45746e8f97	135.223	7.37581	79.9046	47.9428	179.107	15.0872	106.499	57.5212	0.48888	0.750286	0.83348	0.261406	none available
E04F6.9	WBGene00017128	E04F6.9	07796ee8-b11a-43cd-8d8b-b6130f59b80a	86.612	0	71.5491	15.063	437.048	2.45796	347.896	86.6942	0	0.205662	0.173748	0.205662	none available
E04F6.9	WBGene00017128	E04F6.9	f2b90839-7dff-40ae-bdd7-897367f9ec4a	80.6387	1.37844	49.6238	29.6364	437.048	2.45796	347.896	86.6942	0.560806	0.14264	0.34185	-0.418166	none available
E04F6.9	WBGene00017128	E04F6.9	eccb7b79-4cf6-48ba-b426-e15fd73eb71c	43.1809	1.07952	42.1014	0	437.048	2.45796	347.896	86.6942	0.439194	0.121017	0	-0.318177	none available
EEED8.10	WBGene00017138	EEED8.10	003512d6-e260-44ca-b66b-4d79f1b0d831	108.494	41.7286	11.684	55.0817	218.246	71.5774	40.5846	106.084	0.582985	0.287892	0.51923	-0.295093	This gene encodes a protein containing an F-box, a motif predicted Concise description: This gene encodes a protein containing an F-box, a motif predicted to mediate protein-protein interactions either with homologs of yeast Skp-1p or
EEED8.14	WBGene00017142	EEED8.14	8a607154-45db-474a-ac65-371d6abfe7d3	61.5599	10.5531	7.03541	43.9713	102.954	22.8159	10.3472	69.7905	0.462534	0.679935	0.630048	0.217402	none available
EEED8.3	WBGene00017134	EEED8.3	5a9691a4-6a0d-414a-a350-3129d62fa204	24.9102	11.9362	2.59482	10.3793	88.5244	47.2029	5.15478	36.1668	0.252869	0.50338	0.286984	0.250511	EEED8.3 encodes a protein with similarity to fatty acid-binding Concise description: EEED8.3 encodes a protein with similarity to fatty acid-binding
EGAP1.5	WBGene00271775	EGAP1.5	286699bc-9209-48b2-9058-c59bd560c30d	7.51809	5.01206	0.835343	1.67069	15.0362	8.99222	2.6043	3.43965	0.557377	0.320755	0.485714	-0.236622	none available
EGAP1.5	WBGene00271775	EGAP1.5	a80907c4-65f6-4465-8a79-fe840aaf1f79	5.30688	2.65344	1.32672	1.32672	15.0362	8.99222	2.6043	3.43965	0.295082	0.509434	0.385714	0.214352	none available
EGAP2.1	WBGene00017147	EGAP2.1	aa7c8ae6-fc79-4220-9d3d-23c80548cc82	7.96033	5.30688	2.65344	0	39.5805	28.2297	5.4543	5.89654	0.18799	0.486486	0	0.298497	none available
EGAP2.1	WBGene00017147	EGAP2.1	832aed0a-7b29-41b7-8bcb-03106b172c75	15.0362	12.5301	1.25301	1.25301	39.5805	28.2297	5.4543	5.89654	0.443864	0.22973	0.2125	-0.214135	none available
EGAP2.3	WBGene00004020	pho-1	EGAP2.3.2	7.96033	0	1.32672	6.63361	68.017	16.2792	4.85368	46.8841	0	0.273343	0.141489	0.273343	pho-1 encodes the major C. elegans intestinal acid phosphatase; Concise description: pho-1 encodes the major C. elegans intestinal acid phosphatase; PHO-1 may function redundantly with other acid phosphatases; PHO-1 intestinal expression appears to be positively regulated by CKI-1, a cyclin-dependent kinase inhibitor, and negatively regulated by POP-1, a TCF/LEF transcription factor; PHO-1 is exp…
EGAP9.3	WBGene00017151	EGAP9.3	7124b610-4dcb-4b58-a017-3534acc7d32f	4.2234	4.2234	0	0	13.7979	13.3151	0.482779	0	0.317188	0		-0.317188	none available
EGAP9.3	WBGene00017151	EGAP9.3	d0f00563-a2a7-4c9e-95f3-b61ff6111dc5	2.89667	2.4139	0.482779	0	13.7979	13.3151	0.482779	0	0.18129	1		0.81871	none available
F01D4.1	WBGene00008485	ugt-43	F01D4.1a.1	0.663361	0	0.663361	0	11.9405	2.50603	1.91637	7.51809	0	0.346154	0	0.346154	none available
F01D4.1	WBGene00008485	ugt-43	d8560a0f-5532-4d9b-aad8-a27a87bc3782	11.2771	2.50603	1.25301	7.51809	11.9405	2.50603	1.91637	7.51809	1	0.653846	1	-0.346154	none available
F01D4.2	WBGene00008486	ugt-44	d4fb5a15-30f1-4be9-bb13-7cc545ca1c49	1.87952	0	1.25301	0.626507	18.0213	2.52134	5.32723	10.1727	0	0.23521	0.061587	0.23521	none available
F01D4.6	WBGene00003167	mec-3	F01D4.6d.1	1.32672	1.32672	0	0	15.9207	4.11284	9.68506	2.12275	0.322581	0	0	-0.322581	mec-3 encodes a founding member of the LIM (Lin-11, Isl-1, Concise description: mec-3 encodes a founding member of the LIM (Lin-11, Isl-1, Mec-3) homeodomain family of transcriptional regulators; during C. elegans development, MEC-3 activity is required for proper differentiation and maturation of the mechanosensory neurons; MEC-3 is expressed in the mechanosensory neurons, where initiation of ex…
F01D5.3	WBGene00008494	F01D5.3	07151510-008f-4d88-9537-c4e8f7a522ea	1.99008	0.995041	0	0.995041	12.6038	0.995041	1.16088	10.4479	1	0	0.0952381	-1	none available
F01D5.3	WBGene00008494	F01D5.3	6105234b-7530-4151-9c58-8b95c63b206d	9.28705	0	1.16088	8.12617	12.6038	0.995041	1.16088	10.4479	0	1	0.777778	1	none available
F01D5.5	WBGene00008495	F01D5.5	F01D5.5.1	89.4873	6.67816	50.754	32.0552	105.872	6.67816	64.0323	35.1619	1	0.792632	0.911645	-0.207368	none available
F01E11.17	WBGene00219372	F01E11.17	15300986-53be-4599-aa82-87dade226305	1.6584	1.6584	0	0	7.96033	5.41744	2.54288	0	0.306122	0		-0.306122	none available
F01E11.17	WBGene00219372	F01E11.17	8cce67eb-6f00-41c8-b1d2-b710ad257b00	2.65344	1.32672	1.32672	0	7.96033	5.41744	2.54288	0	0.244898	0.521739		0.276841	none available
F01E11.4	WBGene00006642	tsp-16	7c714f59-3429-433c-956e-77d656fe3454	4.4224	0	3.79063	0.631772	32.7258	5.39112	17.2684	10.0662	0	0.219512	0.0627615	0.219512	none available
F01E11.4	WBGene00006642	tsp-16	70109d72-69e8-4b71-8851-858fa78569f1	28.3034	5.39112	13.4778	9.43446	32.7258	5.39112	17.2684	10.0662	1	0.780488	0.937238	-0.219512	none available
F01E11.5	WBGene00017157	tyra-2	e4d1beaf-21a3-44d9-aea9-ae4403373f4b	2.65344	2.65344	0	0	3.98016	2.65344	1.32672	0	1	0		-1	none available
F01E11.5	WBGene00017157	tyra-2	2f919f4f-2228-4775-b534-a26cfe2d4f97	1.32672	0	1.32672	0	3.98016	2.65344	1.32672	0	0	1		1	none available
F01F1.11	WBGene00017165	F01F1.11	06e43e56-8324-43d0-8169-3232a945feb1	105.664	76.7321	12.579	16.3527	358.215	170.862	18.02	169.332	0.449087	0.698058	0.0965719	0.24897	none available
F01G10.9	WBGene00008511	F01G10.9	24317c9e-3279-4986-985f-0deadcef1873	1.99008	1.99008	0	0	9.95041	7.96033	1.32672	0.663361	0.25	0	0	-0.25	none available
F01G10.9	WBGene00008511	F01G10.9	F01G10.9.1	5.30688	5.30688	0	0	9.95041	7.96033	1.32672	0.663361	0.666667	0	0	-0.666667	none available
F01G10.9	WBGene00008511	F01G10.9	4eeb8d4b-a819-420d-a0b5-52714bfeb4d5	1.32672	0	1.32672	0	9.95041	7.96033	1.32672	0.663361	0	1	0	1	none available
F02A9.1	WBGene00008513	F02A9.1	7cb672ce-8b3c-4bcd-9045-64febd8f8ae4	7.96033	1.13719	4.54876	2.27438	13.2672	1.13719	7.64444	4.48558	1	0.595041	0.507042	-0.404959	none available
F02A9.4	WBGene00008514	F02A9.4	21263ae8-07a0-4fcb-a381-9270c15fb698	42.0739	13.0574	11.6066	17.4099	103.025	37.7433	19.3397	45.9421	0.345953	0.600143	0.378953	0.25419	F02A9.4 is orthologous to the human gene SIMILAR TO METHYLCROTONOYL-COENZYME Concise description: F02A9.4 is orthologous to the human gene SIMILAR TO METHYLCROTONOYL-COENZYME
F02C12.1	WBGene00008515	F02C12.1	cce7fcd3-cbfd-4cdd-90e1-6dfc90d83a6f	3.75904	0.626507	0.626507	2.50603	29.409	0.626507	12.0017	16.7807	1	0.0522014	0.149339	-0.947799	none available
F02C12.1	WBGene00008515	F02C12.1	6a81965f-1b8f-4411-89ce-942fb41f34db	15.4784	0	7.33188	8.14653	29.409	0.626507	12.0017	16.7807	0	0.610902	0.485469	0.610902	none available
F02C12.1	WBGene00008515	F02C12.1	6f07e475-226d-49ca-9af1-c0e348d6313e	8.84481	0	3.15886	5.68595	29.409	0.626507	12.0017	16.7807	0	0.2632	0.338838	0.2632	none available
F02C12.8	WBGene00194814	linc-34	caec9f10-16f0-4641-98b0-c334e010d8e1	3.98016	0	2.3881	1.59207	10.6138	0.796033	8.22567	1.59207	0	0.290323	1	0.290323	none available
F02C12.8	WBGene00194814	linc-34	11e3d3ab-636d-4650-a8bb-db717b53427a	3.98016	0.796033	3.18413	0	10.6138	0.796033	8.22567	1.59207	1	0.387097	0	-0.612903	none available
F02D10.5	WBGene00001465	flr-1	c2513f61-60ef-474b-b93a-5e797d4c8989	19.9008	4.5925	4.5925	10.7158	21.2275	4.5925	5.91922	10.7158	1	0.775862	1	-0.224138	flr-1 encodes an ion channel that belongs to the DEG/ENaC sodium Concise description: flr-1 encodes an ion channel that belongs to the DEG/ENaC sodium channel superfamily; flr-1 activity is essential for normal defecation rhythm, growth rates, expulsion, and dauer larvae formation; a rescuing FLR-1::GFP reporter is expressed in the intestine from embryonic to adult stages where it localizes to th…
F02D10.5	WBGene00001465	flr-1	69c04bd4-1037-4da3-93e4-af42febb8169	1.32672	0	1.32672	0	21.2275	4.5925	5.91922	10.7158	0	0.224138	0	0.224138	flr-1 encodes an ion channel that belongs to the DEG/ENaC sodium Concise description: flr-1 encodes an ion channel that belongs to the DEG/ENaC sodium channel superfamily; flr-1 activity is essential for normal defecation rhythm, growth rates, expulsion, and dauer larvae formation; a rescuing FLR-1::GFP reporter is expressed in the intestine from embryonic to adult stages where it localizes to th…
F02D10.6	WBGene00008526	F02D10.6	c256d42e-8be7-4641-b625-8f17787b2e30	3.75904	2.81928	0.939761	0	18.1319	15.6074	0.939761	1.58469	0.180638	1	0	0.819362	none available
F02D10.6	WBGene00008526	F02D10.6	89ebd30c-ac8e-4d3a-a213-4870934f1701	11.056	10.1347	0	0.921334	18.1319	15.6074	0.939761	1.58469	0.649351	0	0.581395	-0.649351	none available
F02D8.2	WBGene00001701	grd-12	ac381c66-46cc-4e02-a90f-2af539959b95	10.8349	8.66791	2.16698	0	13.9306	11.7636	2.16698	0	0.736842	1		0.263158	grd-12 encodes a hedgehog-like protein, with an N-terminal Concise description: grd-12 encodes a hedgehog-like protein, with an N-terminal signal sequence, a central low-complexity proline-rich domain, and a C-terminal Ground domain; GRD-12 is expressed in intestine, rectal epithelium, undefined head and tail cells, vulva, and hypodermis; the Ground domain is predicted to form a cysteine-crosslin…
F02D8.4	WBGene00008521	F02D8.4	6d786628-7075-482b-8276-c87eeaabb52a	76.2865	1.31528	14.4681	60.5031	103.484	6.90997	23.355	73.2192	0.190346	0.619486	0.826327	0.42914	none available
F02D8.5	WBGene00008522	nlp-59	368d3ef3-fa3b-410c-b9d0-9ec4b0ea28c9	64.7219	0.87462	48.1041	15.7432	94.2635	2.03751	72.7723	19.4537	0.429259	0.661022	0.809263	0.231763	none available
F02D8.5	WBGene00008522	nlp-59	ce874ed2-dfd2-40dd-a6a4-96ec7c607a39	25.5836	1.16289	22.0949	2.32578	94.2635	2.03751	72.7723	19.4537	0.570741	0.303617	0.119555	-0.267124	none available
F02E8.2	WBGene00017176	nmur-3	b92ee78a-a06f-4c3d-8cd3-5f7f82ab0db2	5.74912	3.44947	2.29965	0	6.6336	3.44947	3.18413	0	1	0.722222		-0.277778	none available
F02E8.4	WBGene00017177	F02E8.4	F02E8.4.1	8.62369	3.98016	0.663361	3.98016	107.285	35.8336	1.80115	69.4461	0.111074	0.368298	0.057313	0.257224	none available
F02E8.6	WBGene00003561	ncr-1	19900304-ff9f-4ff9-9553-274ab9eb788e	3.22204	1.61102	0.805509	0.805509	41.1284	6.65572	25.6942	8.20988	0.24205	0.0313499	0.0981147	-0.2107	ncr-1 encodes a large transmembrane glycoprotein with a patched-like Concise description: ncr-1 encodes a large transmembrane glycoprotein with a patched-like domain that is orthologous to human NPC1; NCR-1 and NPC1 are eukaryotic members of the resistance-nodulation-division (RND) family of membrane permeases, and have a putative sterol-sensing domain; by homology, NCR-1 is predicted to function…
F02E8.6	WBGene00003561	ncr-1	a50f7da2-7465-4748-9ad6-1e21681c56ae	11.1824	3.35471	6.70942	1.11824	41.1284	6.65572	25.6942	8.20988	0.504034	0.261126	0.136206	-0.242908	ncr-1 encodes a large transmembrane glycoprotein with a patched-like Concise description: ncr-1 encodes a large transmembrane glycoprotein with a patched-like domain that is orthologous to human NPC1; NCR-1 and NPC1 are eukaryotic members of the resistance-nodulation-division (RND) family of membrane permeases, and have a putative sterol-sensing domain; by homology, NCR-1 is predicted to function…
F02H6.2	WBGene00008535	F02H6.2	6a8c7eb1-4351-4b09-9cd1-19bd7edae4c2	23.5493	12.6804	0.905742	9.96316	68.9895	28.5535	3.94247	36.4935	0.444092	0.22974	0.273012	-0.214353	none available
F02H6.4	WBGene00008537	F02H6.4	8969722e-7796-4a6c-a9a7-4a4ae5ca5192	29.2763	10.4558	1.04558	17.7749	38.9171	14.6521	1.04558	23.2195	0.713608	1	0.765516	0.286392	none available
F07A11.5	WBGene00008548	F07A11.5	2a44c82b-067b-4ce8-9dc9-b5d08e0eb761	19.5249	4.64879	3.71903	11.1571	42.4551	12.0743	4.91551	25.4653	0.385015	0.756591	0.43813	0.371576	none available
F07A11.6	WBGene00008549	din-1	7635e4a2-0a51-4f02-81c6-934d9813c289	9.27499	7.84806	0.71346	0.71346	76.7287	34.1329	29.3453	13.2505	0.229927	0.0243126	0.053844	-0.205614	none available
F07A11.6	WBGene00008549	din-1	33268a6d-ec92-43aa-b5d3-51b7e913a9ad	27.5395	7.57337	14.4582	5.5079	76.7287	34.1329	29.3453	13.2505	0.221879	0.492693	0.415675	0.270814	none available
F07A5.4	WBGene00008543	F07A5.4	7d35aa2d-1266-458d-b848-66f735ff290b	1.32672	1.32672	0	0	6.96529	3.16755	3.33339	0.464352	0.418848	0	0	-0.418848	none available
F07A5.4	WBGene00008543	F07A5.4	049407ea-9ebb-40bf-8454-062d0813f988	2.32176	0.58044	1.74132	0	6.96529	3.16755	3.33339	0.464352	0.183246	0.522388	0	0.339142	none available
F07D3.2	WBGene00001449	flp-6	94477c3f-6984-47b1-99ab-47be316917b9	31.8413	0.979732	30.8616	0	196.72	2.00004	173.579	21.1401	0.489855	0.177795	0	-0.31206	none available
F07F6.7	WBGene00017219	F07F6.7	d8ad4bef-c2bc-4ecf-bf1f-32b0cfa43498	1.85741	0.464352	0.928705	0.464352	4.7762	0.464352	3.84749	0.464352	1	0.241379	1	-0.758621	none available
F07F6.7	WBGene00017219	F07F6.7	039b61c9-5eae-41f6-b9ac-cb54f6924e78	1.85741	0	1.85741	0	4.7762	0.464352	3.84749	0.464352	0	0.482759	0	0.482759	none available
F07H5.13	WBGene00008563	F07H5.13	ae6e9a6a-448e-4411-8c5c-6a032ba19fbd	377.758	368.656	4.5513	4.5513	477.951	467.81	4.5513	5.58956	0.788045	1	0.814251	0.211955	none available
F07H5.7	WBGene00008558	F07H5.7	1cda9054-41fb-49a7-9521-f6322eefee56	0.44224	0.44224	0	0	2.2112	0.884481	1.32672	0	0.5	0		-0.5	none available
F07H5.7	WBGene00008558	F07H5.7	F07H5.7.1	0.44224	0.44224	0	0	2.2112	0.884481	1.32672	0	0.5	0		-0.5	none available
F07H5.7	WBGene00008558	F07H5.7	22ab59b1-28db-45f7-b719-054adb836fd6	1.32672	0	1.32672	0	2.2112	0.884481	1.32672	0	0	1		1	none available
F07H5.8	WBGene00008559	F07H5.8	F07H5.8.1	1.32672	1.32672	0	0	3.98016	1.32672	1.32672	1.32672	1	0	0	-1	none available
F07H5.8	WBGene00008559	F07H5.8	cbb98672-9ca9-40ae-8590-bcffd3284604	2.65344	0	1.32672	1.32672	3.98016	1.32672	1.32672	1.32672	0	1	1	1	none available
F08A8.2	WBGene00008565	acox-1.2	F08A8.2.1	7.29697	0.663361	0	6.63361	35.8215	3.17234	1.65988	30.9893	0.209108	0	0.214061	-0.209108	none available
F08A8.2	WBGene00008565	acox-1.2	b0933616-9e0a-4874-a597-94e47a2af24a	7.29697	0.810774	0.810774	5.67542	35.8215	3.17234	1.65988	30.9893	0.255576	0.488455	0.183141	0.232878	none available
F08B4.2	WBGene00000397	cdh-5	970bc845-2a1a-4764-a857-3b74cd828cef	3.98016	2.65344	1.32672	0	51.7421	49.0887	2.65344	0	0.0540541	0.5		0.445946	a homolog of cadherin.
F08B4.2	WBGene00000397	cdh-5	9a203943-0978-4f6d-91fb-102a6b851bd5	2.65344	1.32672	1.32672	0	51.7421	49.0887	2.65344	0	0.027027	0.5		0.472973	a homolog of cadherin.
F08B4.4	WBGene00017236	nlp-60	72cf73d3-ba08-4d9c-ad2b-f138d0851c25	9.28705	2.06379	5.15947	2.06379	10.6138	3.39051	5.15947	2.06379	0.608696	1	1	0.391304	none available
F08B4.4	WBGene00017236	nlp-60	47575ae6-d3d2-4db6-8827-2f43b6ec5ba6	1.32672	1.32672	0	0	10.6138	3.39051	5.15947	2.06379	0.391304	0	0	-0.391304	none available
F08B4.6	WBGene00002028	hst-1	187e4a71-9bbc-4d98-8091-b38095f22289	10.6138	4.54876	3.03251	3.03251	83.833	42.9234	9.64721	31.2624	0.105974	0.31434	0.0970017	0.208366	hst-1 encodes the C. elegans ortholog of N-deacetylase/N-sulfotransferase Concise description: hst-1 encodes the C. elegans ortholog of N-deacetylase/N-sulfotransferase (NDST), a bifunctional enzyme that catalyzes N-deacetylation and N-sulfation of N-acetylglucosamine residues in heparan sulfate; loss of hst-1 activity has been reported to result in embryonic lethality at various stages of develo…
F08B6.1	WBGene00017239	F08B6.1	aa14406c-7662-4ee3-bda2-a3b03fa7c687	3.98016	2.65344	0	1.32672	22.5543	9.16644	3.69874	9.68908	0.289474	0	0.136929	-0.289474	none available
F08C6.5	WBGene00017243	F08C6.5	ad4b16bf-5fb1-40bb-a115-b65cbfe14fe5	4.64352	4.64352	0	0	11.9405	10.2821	1.6584	0	0.451613	0		-0.451613	none available
F08D12.7	WBGene00017250	F08D12.7	ea329c07-bf37-44cf-b96e-c860ac690f7d	3.98016	0	2.65344	1.32672	18.5741	1.99008	12.6038	3.98016	0	0.210526	0.333333	0.210526	F08D12.7 encodes a novel protein conserved amongst Caenorhaditis Concise description: F08D12.7 encodes a novel protein conserved amongst Caenorhaditis species; although loss of F08D12.7 activity via RNAi results in no obvious defects, F08D12.7 transcripts are enriched in L1-stage muscle and upregulated in L2 larvae in response to overexpression of hlh-2 and hlh-8; in addition, in analyses of the …
F08D12.7	WBGene00017250	F08D12.7	F08D12.7.1	11.9405	1.99008	7.29697	2.65344	18.5741	1.99008	12.6038	3.98016	1	0.578947	0.666667	-0.421053	F08D12.7 encodes a novel protein conserved amongst Caenorhaditis Concise description: F08D12.7 encodes a novel protein conserved amongst Caenorhaditis species; although loss of F08D12.7 activity via RNAi results in no obvious defects, F08D12.7 transcripts are enriched in L1-stage muscle and upregulated in L2 larvae in response to overexpression of hlh-2 and hlh-8; in addition, in analyses of the …
F08F1.5	WBGene00000422	ced-8	8741db56-ec88-465d-a478-98dcdfcda814	9.89513	7.19646	0.899557	1.79911	49.752	41.7465	0.899557	7.106	0.172385	1	0.253182	0.827615	The ced-8 gene encodes a homolog of the human putative membrane Concise description: The ced-8 gene encodes a homolog of the human putative membrane transporter XK; ced-8 is required for apoptosis to occur with normal speed during
F08F1.5	WBGene00000422	ced-8	F08F1.5.1	31.8413	26.5344	0	5.30688	49.752	41.7465	0.899557	7.106	0.635609	0	0.746818	-0.635609	The ced-8 gene encodes a homolog of the human putative membrane Concise description: The ced-8 gene encodes a homolog of the human putative membrane transporter XK; ced-8 is required for apoptosis to occur with normal speed during
F08F3.10	WBGene00017266	F08F3.10	88a9499b-54c2-4e77-ae6c-7256a9eab56e	12.5375	10.4479	2.08959	0	22.5543	16.1517	6.40253	0	0.646862	0.326369		-0.320493	none available
F08F3.10	WBGene00017266	F08F3.10	3d16cf63-efe4-4eca-b13a-43c774eb4220	2.91879	0.972929	1.94586	0	22.5543	16.1517	6.40253	0	0.0602368	0.30392		0.243683	none available
F08F3.6	WBGene00017263	F08F3.6	F08F3.6.1	144.613	70.3162	3.98016	70.3162	230.849	110.313	12.2083	108.328	0.637423	0.32602	0.649106	-0.311403	This gene encodes a protein containing an F-box, a motif predicted Concise description: This gene encodes a protein containing an F-box, a motif predicted to mediate protein-protein interactions either with homologs of yeast Skp-1p or
F08F8.3	WBGene00002182	kap-1	d0522762-3328-4bbe-bc22-42be3c182d3f	6.63361	3.3168	3.3168	0	19.8566	12.3532	4.20865	3.29469	0.268496	0.788091	0	0.519595	kap-1 encodes a kinesin-associated protein that, along with Concise description: kap-1 encodes a kinesin-associated protein that, along with KLP-20 and KLP-11, is part of the C. elegans heterotrimeric kinesin-II motor protein; animals homozygous for a kap-1 loss-of-function mutation have normal cilia and thus display normal dye-filling and osmotic avoidance behavior; however, animals doubly mutan…
F08F8.3	WBGene00002182	kap-1	ec98e5b1-fcf6-48af-94a7-a81bcbc93004	5.57223	2.78611	0	2.78611	19.8566	12.3532	4.20865	3.29469	0.225537	0	0.845638	-0.225537	kap-1 encodes a kinesin-associated protein that, along with Concise description: kap-1 encodes a kinesin-associated protein that, along with KLP-20 and KLP-11, is part of the C. elegans heterotrimeric kinesin-II motor protein; animals homozygous for a kap-1 loss-of-function mutation have normal cilia and thus display normal dye-filling and osmotic avoidance behavior; however, animals doubly mutan…
F08G12.1	WBGene00008585	F08G12.1	7d2a6e0e-d386-43f3-bb4b-c75a0e1249de	14.497	12.564	0.966465	0.966465	32.0403	24.4103	5.63173	1.99825	0.514702	0.171611	0.483657	-0.343091	none available
F08G12.8	WBGene00008589	nlp-57	2537fc91-9a07-477e-a0b1-01ae534e054f	12.3638	0.727281	10.1819	1.45456	45.7245	7.6604	33.2677	4.79635	0.0949403	0.30606	0.303264	0.21112	none available
F08G12.8	WBGene00008589	nlp-57	3ca8e7c8-a4e2-4119-9c68-f974a3634339	18.0023	1.63658	14.7292	1.63658	45.7245	7.6604	33.2677	4.79635	0.213641	0.442747	0.341213	0.229106	none available
F08G5.6	WBGene00008584	irg-4	F08G5.6.2	27.8611	0	3.98016	23.881	54.3956	1.01162	6.66677	46.7172	0	0.597015	0.511182	0.597015	F08G5.6 encodes a CUB-like domain-containing protein; F08G5.6 Concise description: F08G5.6 encodes a CUB-like domain-containing protein; F08G5.6 is involved in the transcriptional, innate immune response towards several different bacterial pathogens; an F08G5.6::gfp promoter fusion is expressed in the intestine and in head neurons; F08G5.6 expression is positively regulated in the intestine
F08G5.6	WBGene00008584	irg-4	a14210fe-6af8-4e3a-b908-c6f32c05c871	20.2325	1.01162	2.02325	17.1976	54.3956	1.01162	6.66677	46.7172	1	0.303483	0.368122	-0.696517	F08G5.6 encodes a CUB-like domain-containing protein; F08G5.6 Concise description: F08G5.6 encodes a CUB-like domain-containing protein; F08G5.6 is involved in the transcriptional, innate immune response towards several different bacterial pathogens; an F08G5.6::gfp promoter fusion is expressed in the intestine and in head neurons; F08G5.6 expression is positively regulated in the intestine
F08H9.3	WBGene00008591	F08H9.3	faab4ea6-d101-4e7e-a195-bff633731fe0	51.5652	0	47.9676	3.59757	66.7341	3.55056	59.5859	3.59757	0	0.805016	1	0.805016	F08H9.3 encodes a heat shock protein (HSP) of the HSP16 class; Concise description: F08H9.3 encodes a heat shock protein (HSP) of the HSP16 class; unlike most HSP16s in C. elegans, it is specifically expressed in a particular tissue (the larval pharynx and the anterior adult pharynx), and its expression is not strongly induced by heat shock; however, F08H9.3 expression is increased by heat shock …
F08H9.3	WBGene00008591	F08H9.3	adb36baa-85b5-4d5e-82a7-a4096e16d0c8	12.427	3.55056	8.8764	0	66.7341	3.55056	59.5859	3.59757	1	0.148968	0	-0.851032	F08H9.3 encodes a heat shock protein (HSP) of the HSP16 class; Concise description: F08H9.3 encodes a heat shock protein (HSP) of the HSP16 class; unlike most HSP16s in C. elegans, it is specifically expressed in a particular tissue (the larval pharynx and the anterior adult pharynx), and its expression is not strongly induced by heat shock; however, F08H9.3 expression is increased by heat shock …
F08H9.6	WBGene00008594	clec-57	6c2d894f-1235-46b5-a947-3250dabd8b95	29.2352	1.00811	9.07301	19.1541	86.2369	1.00811	41.9277	43.3011	1	0.216397	0.442348	-0.783603	none available
F08H9.6	WBGene00008594	clec-57	564b5348-6b05-4e12-a586-3ed61b439929	46.4826	0	27.2093	19.2733	86.2369	1.00811	41.9277	43.3011	0	0.648959	0.445099	0.648959	none available
F08H9.7	WBGene00008595	clec-56	aee783b6-f179-4772-b9fa-395ded34ba83	46.9407	6.25875	17.7331	22.9488	153.9	21.4029	35.764	96.7327	0.292426	0.495837	0.237239	0.203411	none available
F09A5.14	WBGene00219579	linc-43	98669e6a-3435-4ce1-aaec-b553c40ad9d8	2.2112	2.2112	0	0	6.63361	5.74912	0.884481	0	0.384615	0		-0.384615	none available
F09A5.14	WBGene00219579	linc-43	f0882da7-1e19-4a26-bdb4-8e54c17c888c	3.53792	2.65344	0.884481	0	6.63361	5.74912	0.884481	0	0.461538	1		0.538462	none available
F09A5.2	WBGene00008599	F09A5.2	35c4c8cb-b919-4894-bf78-9659d12af7f7	5.30688	1.32672	2.65344	1.32672	6.63361	1.32672	3.98016	1.32672	1	0.666667	1	-0.333333	none available
F09A5.2	WBGene00008599	F09A5.2	94ac2df7-d240-4298-b12b-14c39893093c	1.32672	0	1.32672	0	6.63361	1.32672	3.98016	1.32672	0	0.333333	0	0.333333	none available
F09A5.3	WBGene00008600	F09A5.3	98669e6a-3435-4ce1-aaec-b553c40ad9d8	1.32672	1.32672	0	0	3.98016	2.65344	1.32672	0	0.5	0		-0.5	none available
F09A5.3	WBGene00008600	F09A5.3	f0882da7-1e19-4a26-bdb4-8e54c17c888c	2.65344	1.32672	1.32672	0	3.98016	2.65344	1.32672	0	0.5	1		0.5	none available
F09B12.2	WBGene00008606	dhhc-1	eb9e85ac-4cca-4c50-b6cb-a7a55a6243ac	92.0334	64.5429	9.56191	17.9286	119.405	86.5013	9.56191	23.3417	0.74615	1	0.768092	0.25385	none available
F09B9.5	WBGene00008604	F09B9.5	F09B9.5.1	1.32672	1.32672	0	0	17.2474	3.8696	12.1063	1.27144	0.342857	0	0	-0.342857	none available
F09B9.5	WBGene00008604	F09B9.5	d4a4d88d-482f-4bef-84f3-3902ab048937	15.2573	2.54288	11.443	1.27144	17.2474	3.8696	12.1063	1.27144	0.657143	0.945205	1	0.288063	none available
F09C12.1	WBGene00001588	ggr-3	91e7e0b3-3955-4bd5-9da4-656ac8a3b5a9	2.65344	0.884481	1.76896	0	9.28705	1.76896	7.51809	0	0.5	0.235294		-0.264706	ggr-3 encodes a predicted member of the GABA/ glycine receptor Concise description: ggr-3 encodes a predicted member of the GABA/ glycine receptor family of ligand-gated chloride channels; expressed in the AVA, AVB, SMDD, DVA,
F09C12.1	WBGene00001588	ggr-3	87f2ad1d-65d4-42c4-b085-2a2ee37d4578	2.65344	0	2.65344	0	9.28705	1.76896	7.51809	0	0	0.352941		0.352941	ggr-3 encodes a predicted member of the GABA/ glycine receptor Concise description: ggr-3 encodes a predicted member of the GABA/ glycine receptor family of ligand-gated chloride channels; expressed in the AVA, AVB, SMDD, DVA,
F09C12.1	WBGene00001588	ggr-3	2147e24b-b1b2-4215-9d5f-b484a9b89293	2.65344	0.884481	1.76896	0	9.28705	1.76896	7.51809	0	0.5	0.235294		-0.264706	ggr-3 encodes a predicted member of the GABA/ glycine receptor Concise description: ggr-3 encodes a predicted member of the GABA/ glycine receptor family of ligand-gated chloride channels; expressed in the AVA, AVB, SMDD, DVA,
F09C3.2	WBGene00008610	F09C3.2	F09C3.2.1	14.5939	1.32672	11.9405	1.32672	72.0058	1.32672	42.6456	28.0335	1	0.279994	0.0473264	-0.720006	none available
F09C8.1	WBGene00008621	F09C8.1	d34da22a-c885-408f-8a0b-f90876e64c07	1.32672	0.663361	0	0.663361	22.5543	2.85848	14.3045	5.39131	0.232068	0	0.123043	-0.232068	none available
F09D12.1	WBGene00001699	grd-10	ef5dde8d-930b-49a6-833a-ee9c70f850c3	218.162	4.79477	86.3058	127.061	309.099	5.74427	139.998	163.357	0.834704	0.61648	0.777813	-0.218225	grd-10 encodes a hedgehog-like protein, with an N-terminal Concise description: grd-10 encodes a hedgehog-like protein, with an N-terminal signal sequence and a C-terminal Ground domain; GRD-10 is expressed in seam cells; the Ground domain is predicted to form a cysteine-crosslinked protein involved in intercellular signalling, and it has subtle similarity to the N-terminal Hedge domain of HEDGEH…
F09E10.6	WBGene00017296	F09E10.6	e4c205fb-9375-42a4-aa77-441cee925bec	20.9954	20.9954	0	0	37.3804	36.319	1.06138	0	0.578082	0		-0.578082	none available
F09E10.6	WBGene00017296	F09E10.6	F09E10.6.1	5.30688	4.24551	1.06138	0	37.3804	36.319	1.06138	0	0.116895	1		0.883105	none available
F09E10.7	WBGene00017297	F09E10.7	7bc7c750-5da2-4d6a-99c0-c67661e576da	5.53327	0.691659	3.45829	1.38332	23.6546	1.56072	17.1771	4.91673	0.443166	0.201331	0.281349	-0.241835	none available
F09E5.10	WBGene00017288	F09E5.10	0d3ccc01-c4ea-4aae-9b1e-715e595be51a	4.4224	1.1056	0	3.3168	10.6138	1.1056	1.32672	8.18145	1	0	0.405405	-1	none available
F09E5.10	WBGene00017288	F09E5.10	bef63cbe-0507-48ca-9da4-244cf1fce3f5	1.32672	0	1.32672	0	10.6138	1.1056	1.32672	8.18145	0	1	0	1	none available
F09E5.14	WBGene00017291	F09E5.14	c3f140d0-6e77-40c0-8d18-6352ef138f8c	1.32672	1.32672	0	0	43.7376	5.97848	27.748	10.0111	0.221916	0	0	-0.221916	none available
F09E5.16	WBGene00017292	F09E5.16	64585187-9156-43a8-8218-d67833d61b02	13.223	1.55565	7.0004	4.66694	18.6183	1.55565	11.6262	5.43643	1	0.602121	0.858455	-0.397879	none available
F09E8.3	WBGene00003421	msh-5	701b6cb7-65ec-4739-8812-457302229f59	13.3588	2.00382	2.67176	8.68323	23.7894	2.27833	4.43946	17.0716	0.879515	0.601822	0.508637	-0.277693	msh-5 encodes a germline-specific homolog of the yeast and Concise description: msh-5 encodes a germline-specific homolog of the yeast and mammalian DNA mismatch repair protein MSH5 (MutS-family) that is required for crossing over and chiasma formation during Caenorhabditis elegans meiosis; inactivation of both rad-51 and msh-5 induces chromosome fragmentation, not seen with inactivation
F09F3.6	WBGene00008628	ttr-21	f2fa9676-335a-4248-955f-e440709298bf	2.59137	0.235579	2.12021	0.235579	190.589	1.00214	161.595	26.6645	0.235076	0.0131205	0.00883493	-0.221956	none available
F09F3.9	WBGene00008629	cpt-5	9b1526c7-5e65-4f0e-920a-00f142d6ea18	9.28705	0	6.63361	2.65344	22.5543	0.947658	8.90798	12.6986	0	0.744681	0.208955	0.744681	none available
F09F3.9	WBGene00008629	cpt-5	F09F3.9.2	6.63361	0.947658	0.947658	4.73829	22.5543	0.947658	8.90798	12.6986	1	0.106383	0.373134	-0.893617	none available
F09F9.1	WBGene00017306	F09F9.1	a989c292-f85e-43c8-a363-9ff386f78312	21.8909	1.36818	10.9454	9.57727	26.5344	2.6949	14.2623	9.57727	0.507692	0.767442	1	0.25975	none available
F09F9.1	WBGene00017306	F09F9.1	8c126543-dacc-4076-bb9d-19798aa92a4c	2.65344	1.32672	1.32672	0	26.5344	2.6949	14.2623	9.57727	0.492308	0.0930233	0	-0.399284	none available
F09G8.2	WBGene00007056	crn-7	623161eb-9b5c-4859-9fdf-83ba9d677e39	10.936	0	3.21646	7.71951	40.0765	3.67829	13.5669	22.8313	0	0.237081	0.338112	0.237081	none available
F09G8.2	WBGene00007056	crn-7	f293f332-e3c4-4951-ad73-893e227529de	1.6584	1.6584	0	0	40.0765	3.67829	13.5669	22.8313	0.450862	0	0	-0.450862	none available
F09G8.5	WBGene00017320	F09G8.5	26d55e04-87d9-4e69-8a9b-bc0e81e72cf8	7.73921	1.54784	6.19136	0	14.5939	5.39533	9.1986	0	0.286885	0.673077		0.386192	none available
F09G8.5	WBGene00017320	F09G8.5	e8a70dec-5476-4e89-b3ac-77eb432ba039	6.41248	3.84749	2.56499	0	14.5939	5.39533	9.1986	0	0.713115	0.278846		-0.434269	none available
F10B5.3	WBGene00008640	F10B5.3	e0ea18bc-78a6-4f61-b788-167205fae94c	2.65344	0.884481	1.76896	0	9.95041	1.54784	8.40257	0	0.571429	0.210526		-0.360902	none available
F10B5.3	WBGene00008640	F10B5.3	81609c68-aa1c-45fe-9627-02077af0f327	0.663361	0.663361	0	0	9.95041	1.54784	8.40257	0	0.428571	0		-0.428571	none available
F10B5.3	WBGene00008640	F10B5.3	6c55fc2f-0219-40c2-b6c7-4e288ac17b58	5.30688	0	5.30688	0	9.95041	1.54784	8.40257	0	0	0.631579		0.631579	none available
F10D11.2	WBGene00008648	F10D11.2	F10D11.2.1	54.3956	18.5741	1.32672	34.4947	114.696	48.8642	10.2365	55.5953	0.380116	0.129607	0.620461	-0.250509	none available
F10D2.2	WBGene00017329	ugt-39	f27fb25e-06ce-4dc0-bec1-82233eb80e4f	1.58101	0	0.527003	1.05401	34.4947	2.35184	2.62824	29.5147	0	0.200516	0.0357113	0.200516	none available
F10D2.2	WBGene00017329	ugt-39	5abf37c5-a308-4792-b171-5735d7ead19c	14.485	1.60944	0.804719	12.0708	34.4947	2.35184	2.62824	29.5147	0.684333	0.306182	0.408976	-0.378151	none available
F10D2.8	WBGene00017334	F10D2.8	710d5188-89ae-4d5a-9960-38061b5182fc	2.10064	2.10064	0	0	11.1666	8.31043	2.15592	0.700214	0.252772	0	0	-0.252772	none available
F10D2.8	WBGene00017334	F10D2.8	F10D2.8a.1	1.6584	0.829201	0.829201	0	11.1666	8.31043	2.15592	0.700214	0.0997783	0.384615	0	0.284837	none available
F10D7.5	WBGene00017342	F10D7.5	4d5cc45f-e10f-40b4-a32a-831cc9a160fe	20.5642	2.80421	15.8905	1.86947	78.9399	31.9961	30.2525	16.6913	0.0876422	0.525262	0.112003	0.43762	F10D7.5 encodes an ortholog of Drosophila NEURALIZED, and thus Concise description: F10D7.5 encodes an ortholog of Drosophila NEURALIZED, and thus may participate in GLP-1/LIN-12 signalling; the promoter or 5' protein-coding regions of F10D7.5 are bound by DAF-16 in vivo, and F10D7.5 expression drops by roughly
F10D7.5	WBGene00017342	F10D7.5	29fb8163-a70c-47d3-8bc9-092b435e96ff	21.6698	14.0216	3.18673	4.46142	78.9399	31.9961	30.2525	16.6913	0.438229	0.105338	0.26729	-0.332892	F10D7.5 encodes an ortholog of Drosophila NEURALIZED, and thus Concise description: F10D7.5 encodes an ortholog of Drosophila NEURALIZED, and thus may participate in GLP-1/LIN-12 signalling; the promoter or 5' protein-coding regions of F10D7.5 are bound by DAF-16 in vivo, and F10D7.5 expression drops by roughly
F10E7.11	WBGene00017352	F10E7.11	835b703d-2d19-4160-940f-8eaa6c888130	4.46663	0.63809	0	3.82854	21.2275	1.59401	4.19448	15.439	0.400305	0	0.247978	-0.400305	none available
F10E7.11	WBGene00017352	F10E7.11	F10E7.11.1	2.65344	0	1.32672	1.32672	21.2275	1.59401	4.19448	15.439	0	0.316302	0.0859328	0.316302	none available
F10E9.1	WBGene00017353	F10E9.1	0b871766-32ac-4458-a855-34d27e80788f	2.12275	1.06138	1.06138	0	22.0109	2.26355	19.7474	0	0.4689	0.0537477		-0.415152	none available
F10E9.1	WBGene00017353	F10E9.1	F10E9.1.1	7.96033	0	7.96033	0	22.0109	2.26355	19.7474	0	0	0.403108		0.403108	none available
F10F2.3	WBGene00008655	lips-3	75564e53-5984-4ece-9fcf-37f7c57e733c	38.4749	33.6655	3.60702	1.20234	59.7024	50.5511	7.94902	1.20234	0.665971	0.45377	1	-0.212201	none available
F10F2.3	WBGene00008655	lips-3	e67202aa-6c87-4924-94ff-efb08814d4ac	15.9207	11.5787	4.342	0	59.7024	50.5511	7.94902	1.20234	0.229049	0.54623	0	0.317182	none available
F10G2.1	WBGene00017362	F10G2.1	F10G2.1.2	154.38	1.2865	92.6279	60.4654	337.746	1.2865	228.094	108.365	1	0.406094	0.557978	-0.593906	none available
F10G2.4	WBGene00017365	F10G2.4	4aafa777-3cc5-42bd-82f4-f022623a4fbf	31.2885	26.8187	1.11745	3.35234	44.0029	39.5331	1.11745	3.35234	0.678386	1	1	0.321614	none available
F10G2.4	WBGene00017365	F10G2.4	8b10b582-f6dd-4163-91d0-457d56b26350	9.61873	9.61873	0	0	44.0029	39.5331	1.11745	3.35234	0.243308	0	0	-0.243308	none available
F10G7.5	WBGene00017369	F10G7.5	F10G7.5a.2	25.2077	4.20128	12.6038	8.40257	84.9101	39.9239	30.7194	14.2669	0.105232	0.41029	0.588955	0.305057	none available
F11A5.10	WBGene00001591	glc-1	6c7970e5-164f-4e9b-9423-4a2008e11f97	195.921	2.46442	186.064	7.39326	267.998	7.74223	251.528	8.72778	0.318309	0.739735	0.847096	0.421426	glc-1 encodes the alpha subunit of a glutamate-gated chloride Concise description: glc-1 encodes the alpha subunit of a glutamate-gated chloride channel and forms a functional channel in Xenopus oocytes; mutations genetically interact with avr-14 and avr-15 mutations such that triple mutants exhibit high
F11A6.2	WBGene00008681	scrm-4	9a409406-abb9-49f4-a22d-09bfe8d12e7e	8.73425	3.74325	3.74325	1.24775	17.8002	5.76097	9.11923	2.91997	0.64976	0.410478	0.427316	-0.239282	scrm-4 encodes a putative phospholipid scramblase homologous Concise description: scrm-4 encodes a putative phospholipid scramblase homologous to human PLSCR1-5, and paralogous to other C. elegans SCRMs (e.g., SCRM-1); in apoptotic germline cells, SCRM-4 is fully dispensable for normally rapid engulfment and largely dispensable for phosphatidylserine exposure; SCRM-4 does not bind WAH-1 in vitro,
F11A6.2	WBGene00008681	scrm-4	48021fad-d608-4275-8fde-de3d2d4ea176	8.07089	2.01772	5.0443	1.00886	17.8002	5.76097	9.11923	2.91997	0.35024	0.55315	0.345504	0.20291	scrm-4 encodes a putative phospholipid scramblase homologous Concise description: scrm-4 encodes a putative phospholipid scramblase homologous to human PLSCR1-5, and paralogous to other C. elegans SCRMs (e.g., SCRM-1); in apoptotic germline cells, SCRM-4 is fully dispensable for normally rapid engulfment and largely dispensable for phosphatidylserine exposure; SCRM-4 does not bind WAH-1 in vitro,
F11C1.3	WBGene00008692	scav-4	f8bceaf4-16a0-4214-bfe7-caff39146e27	34.7159	4.95941	1.23985	28.5166	37.8115	8.05509	1.23985	28.5166	0.615686	1	1	0.384314	none available
F11C7.3	WBGene00006886	vap-1	1d90eede-6746-44a5-8d98-52c8ea9aeb66	29.0303	0	23.9815	5.04874	131.345	3.41232	106.033	21.9001	0	0.22617	0.230535	0.22617	vap-1 encodes a predicted secreted protein that is similar Concise description: vap-1 encodes a predicted secreted protein that is similar to the venom allergen-like proteins found in a number of invertebrates, including parasitic nematodes; a vap-1 reporter fusion is expressed specifically within the
F11C7.6	WBGene00017378	F11C7.6	F11C7.6a.1	0.663361	0.663361	0	0	6.63361	1.82424	3.64848	1.16088	0.363636	0	0	-0.363636	none available
F11C7.6	WBGene00017378	F11C7.6	f6e503f5-18a6-427d-9192-2c8b0111b4c4	1.32672	0	1.32672	0	6.63361	1.82424	3.64848	1.16088	0	0.363636	0	0.363636	none available
F11D5.1	WBGene00017380	F11D5.1	5194cfd6-f929-47dd-9730-4c5b21d8189e	2.65344	2.65344	0	0	14.5939	9.99463	1.14982	3.44947	0.265487	0	0	-0.265487	none available
F11D5.1	WBGene00017380	F11D5.1	83057aa5-3cf9-4f5b-84df-cc695f201dff	3.98016	3.98016	0	0	14.5939	9.99463	1.14982	3.44947	0.39823	0	0	-0.39823	none available
F11D5.1	WBGene00017380	F11D5.1	5cf6be49-b043-45a0-ade9-277ee304de3f	6.89895	2.29965	1.14982	3.44947	14.5939	9.99463	1.14982	3.44947	0.230088	1	1	0.769912	none available
F11D5.3	WBGene00017381	ddr-2	6e346c5b-c2c9-4c44-9ded-e9cd86408f09	14.5939	9.28705	2.65344	2.65344	17.2474	11.9405	2.65344	2.65344	0.777778	1	1	0.222222	F11D5.3 encodes a putative tyrosine kinase homologous to human Concise description: F11D5.3 encodes a putative tyrosine kinase homologous to human
F11D5.3	WBGene00017381	ddr-2	b8bad88b-8c7d-4edd-b2be-bf0f97e0f53c	2.65344	2.65344	0	0	17.2474	11.9405	2.65344	2.65344	0.222222	0	0	-0.222222	F11D5.3 encodes a putative tyrosine kinase homologous to human Concise description: F11D5.3 encodes a putative tyrosine kinase homologous to human
F11F1.1	WBGene00008714	F11F1.1	0ccf0686-23ce-41fc-a0e2-53f0bf95081e	5.74912	1.14982	1.14982	3.44947	29.1879	2.47655	6.6336	20.0777	0.464286	0.173333	0.171806	-0.290952	none available
F11F1.1	WBGene00008714	F11F1.1	2583bdca-6d95-487a-84c6-f1b09cd31ada	18.5741	0	3.71482	14.8593	29.1879	2.47655	6.6336	20.0777	0	0.56	0.740088	0.56	none available
F11F1.1	WBGene00008714	F11F1.1	a90a559e-a7e2-44e0-b891-fb6e68b0b287	2.65344	0	1.76896	0.884481	29.1879	2.47655	6.6336	20.0777	0	0.266667	0.0440529	0.266667	none available
F11F1.1	WBGene00008714	F11F1.1	0f263137-9714-4080-9d98-577d1b90153d	1.76896	0.884481	0	0.884481	29.1879	2.47655	6.6336	20.0777	0.357143	0	0.0440529	-0.357143	none available
F11F1.7	WBGene00008719	ttr-52	9601cf10-c080-4a0b-aa7a-e42c717bace8	14.5939	13.621	0.972929	0	21.2275	20.2546	0.972929	0	0.672489	1		0.327511	ttr-52 encodes a transthyretin-like secreted protein that is Concise description: ttr-52 encodes a transthyretin-like secreted protein that is required for proper cell corpse engulfment; genetic analysis indicates that ttr-52 functions in the ced-1/CD91 pathway for engulfment; TTR-52 binds to both surface-exposed phosphatidylserine in vivo and the extracellular domain of CED-1, therefore acting l…
F11F1.7	WBGene00008719	ttr-52	fc8dcb70-d996-48fa-9da0-cb6fa5507e7a	5.30688	5.30688	0	0	21.2275	20.2546	0.972929	0	0.262009	0		-0.262009	ttr-52 encodes a transthyretin-like secreted protein that is Concise description: ttr-52 encodes a transthyretin-like secreted protein that is required for proper cell corpse engulfment; genetic analysis indicates that ttr-52 functions in the ced-1/CD91 pathway for engulfment; TTR-52 binds to both surface-exposed phosphatidylserine in vivo and the extracellular domain of CED-1, therefore acting l…
F12A10.5	WBGene00017394	cal-8	8287e10f-4c37-435f-93cf-3db29127ffd6	1.32672	0	1.32672	0	6.63361	1.32672	3.3168	1.99008	0	0.4	0	0.4	none available
F12A10.5	WBGene00017394	cal-8	e53cc5df-fb25-4d88-af57-a037e5a535bd	3.98016	0	1.99008	1.99008	6.63361	1.32672	3.3168	1.99008	0	0.6	1	0.6	none available
F12A10.5	WBGene00017394	cal-8	e66bd8d8-0e5a-435d-9cf9-488d6bb54615	1.32672	1.32672	0	0	6.63361	1.32672	3.3168	1.99008	1	0	0	-1	none available
F12A10.8	WBGene00017397	F12A10.8	e72ae615-4177-4762-97ac-32b8b0a45f64	25.521	2.32009	1.16004	22.0408	35.8215	4.89614	1.16004	29.7653	0.473861	1	0.740487	0.526139	none available
F12A10.8	WBGene00017397	F12A10.8	54e63ed9-3afc-40f7-ba2f-92e394b80a62	4.29342	2.57605	0	1.71737	35.8215	4.89614	1.16004	29.7653	0.526139	0	0.057697	-0.526139	none available
F12B6.2	WBGene00017398	slc-17.6	F12B6.2a.1	5.97024	1.32672	1.99008	2.65344	52.6266	3.25915	15.2473	34.1202	0.407075	0.130521	0.0777675	-0.276555	none available
F12B6.2	WBGene00017398	slc-17.6	f7bd9827-d5da-4ece-b0a6-912d4a09a828	5.8818	0	3.52908	2.35272	52.6266	3.25915	15.2473	34.1202	0	0.231456	0.0689539	0.231456	none available
F12D9.1	WBGene00017400	stg-2	14ad820e-6042-48a7-9353-5282a9c7f4fd	3.3168	1.1056	2.2112	0	6.63361	3.3168	2.2112	1.1056	0.333333	1	0	0.666667	stg-2 encodes, along with stg-1, one of two C. elegans TARPs Concise description: stg-2 encodes, along with stg-1, one of two C. elegans TARPs
F12D9.1	WBGene00017400	stg-2	05764b51-164d-43ca-991e-31f52fe9d102	3.3168	2.2112	0	1.1056	6.63361	3.3168	2.2112	1.1056	0.666667	0	1	-0.666667	stg-2 encodes, along with stg-1, one of two C. elegans TARPs Concise description: stg-2 encodes, along with stg-1, one of two C. elegans TARPs
F12E12.1	WBGene00017402	F12E12.1	a5df7fd5-f059-4994-a8d3-9791dbfb1ea0	89.9991	67.8681	0	22.1309	197.855	149.594	1.16988	47.0912	0.453682	0	0.469958	-0.453682	none available
F12E12.1	WBGene00017402	F12E12.1	F12E12.1.1	54.3987	39.1182	0	15.2805	197.855	149.594	1.16988	47.0912	0.261496	0	0.324488	-0.261496	none available
F12E12.1	WBGene00017402	F12E12.1	f7b3468c-d184-4251-991b-cce9104ef9d4	3.09884	2.78896	0.309884	0	197.855	149.594	1.16988	47.0912	0.0186435	0.264885	0	0.246241	none available
F12E12.1	WBGene00017402	F12E12.1	a63a5a5a-a367-4b2a-9be8-ca86b2f59488	30.96	22.36	0.86	7.74	197.855	149.594	1.16988	47.0912	0.149471	0.735115	0.164362	0.585644	none available
F13A2.4	WBGene00017413	F13A2.4	1bb848a0-2d05-4647-b497-19f995688500	10.6138	2.65344	2.65344	5.30688	30.5146	7.03162	2.65344	20.8295	0.377358	1	0.254777	0.622642	none available
F13A2.4	WBGene00017413	F13A2.4	287e20c3-c4dc-4bed-a70a-e95ef1415ed6	18.5741	3.71482	0	14.8593	30.5146	7.03162	2.65344	20.8295	0.528302	0	0.713376	-0.528302	none available
F13A7.12	WBGene00008727	F13A7.12	cda9c2a4-c0c7-458f-af56-9c7a2161c7e3	1.1056	0.5528	0.5528	0	16.584	14.9502	1.63383	0	0.0369762	0.338346		0.30137	none available
F13A7.12	WBGene00008727	F13A7.12	fbbd0d67-955f-41f7-82de-bde12e560bb9	5.30688	5.30688	0	0	16.584	14.9502	1.63383	0	0.354971	0		-0.354971	none available
F13B12.2	WBGene00008730	F13B12.2	d734a7f6-77aa-4d7a-8c28-8d08f5a13cbf	9.28705	4.64352	1.54784	3.09568	22.5543	9.78457	9.01065	3.75904	0.474576	0.171779	0.823529	-0.302797	none available
F13B12.3	WBGene00008731	F13B12.3	a706e112-8efb-4beb-ae57-cf371447eacb	7.96033	2.65344	3.98016	1.32672	9.28705	2.65344	5.30688	1.32672	1	0.75	1	-0.25	none available
F13B12.3	WBGene00008731	F13B12.3	9c23ee40-4e35-4d9e-aadc-6bf3ac11db49	1.32672	0	1.32672	0	9.28705	2.65344	5.30688	1.32672	0	0.25	0	0.25	none available
F13C5.1	WBGene00017422	F13C5.1	F13C5.1.2	3.3168	2.4876	0.829201	0	13.0461	5.45693	5.06207	2.52709	0.455861	0.163807	0	-0.292055	F13C5.1 encodes a novel protein with two predicted transmembrane Concise description: F13C5.1 encodes a novel protein with two predicted transmembrane domains; the protein product of F13C5.1 is most closely related to proteins from other nematode species and does not appear to have close homologs in more distantly
F13C5.1	WBGene00017422	F13C5.1	2821a0bc-660c-4c13-94c1-6456b33e150a	8.84481	2.52709	3.79063	2.52709	13.0461	5.45693	5.06207	2.52709	0.463097	0.74883	1	0.285733	F13C5.1 encodes a novel protein with two predicted transmembrane Concise description: F13C5.1 encodes a novel protein with two predicted transmembrane domains; the protein product of F13C5.1 is most closely related to proteins from other nematode species and does not appear to have close homologs in more distantly
F13D12.10	WBGene00008744	F13D12.10	2e888c6e-613e-4da5-8069-a2ba0209dfff	14.5276	3.35252	5.58754	5.58754	21.2275	4.40063	10.1913	6.63565	0.761827	0.548268	0.842049	-0.21356	none available
F13D2.2	WBGene00008736	gnrr-6	9cb0f161-8c3a-484f-a109-44b1db998c08	4.64352	1.85741	2.78611	0	8.62369	4.51085	4.11284	0	0.411765	0.677419		0.265655	none available
F13E9.1	WBGene00008750	F13E9.1	20ecd1cc-b597-460d-9475-6ffacf9c59a6	42.4551	17.8037	4.10856	20.5428	55.7223	20.4572	6.762	28.5031	0.870293	0.607595	0.720721	-0.262698	none available
F13E9.1	WBGene00008750	F13E9.1	2b775ebb-e7b4-4395-bfc5-fc3428aafa7f	13.2672	2.65344	2.65344	7.96033	55.7223	20.4572	6.762	28.5031	0.129707	0.392405	0.279279	0.262698	none available
F13G3.2	WBGene00005131	srd-53	8fe5c02a-d4ac-431d-8b5c-732aae05dacd	2.65344	1.32672	1.32672	0	3.98016	2.65344	1.32672	0	0.5	1		0.5	none available
F13G3.2	WBGene00005131	srd-53	d3235b66-ed16-4a1e-a03b-6ba1dae88318	1.32672	1.32672	0	0	3.98016	2.65344	1.32672	0	0.5	0		-0.5	none available
F13H10.1	WBGene00008773	F13H10.1	F13H10.1.1	2.65344	0	1.99008	0.663361	10.061	1.48151	7.9161	0.663361	0	0.251397	1	0.251397	none available
F13H10.2	WBGene00003586	ndx-9	97495427-2335-4759-8325-dd48adb57c22	119.803	19.3622	24.2027	76.2385	185.343	50.4719	38.8202	96.0504	0.383622	0.623456	0.793734	0.239833	The ndx-9 gene encodes a member of the NADH pyrophosphatase Concise description: The ndx-9 gene encodes a member of the NADH pyrophosphatase
F13H10.5	WBGene00008776	F13H10.5	557274f7-226c-4496-918f-420eb433b7ff	34.3178	32.238	1.03993	1.03993	45.1085	43.0286	1.03993	1.03993	0.749221	1	1	0.250779	none available
F13H6.1	WBGene00017430	bcl-11	867b5bb3-9375-4c2f-b9c4-017e48b6da79	5.30688	0	5.30688	0	54.3956	25.3993	22.8933	6.10292	0	0.231809	0	0.231809	none available
F13H6.5	WBGene00017433	F13H6.5	7a6779b8-0350-456c-a80e-b5a63b7b19d0	3.98016	3.98016	0	0	17.9107	4.82779	12.4196	0	0.824427	0		-0.824427	none available
F13H6.5	WBGene00017433	F13H6.5	9f35751f-986b-482b-9fee-b5471b455580	6.41248	0	6.41248	0	17.9107	4.82779	12.4196	0	0	0.51632		0.51632	none available
F13H8.1	WBGene00017434	F13H8.1	c8a08de3-be72-41fa-b4c7-2262fb8763dd	4.64352	4.64352	0	0	26.9767	17.1099	9.16435	0.702382	0.271393	0	0	-0.271393	none available
F13H8.1	WBGene00017434	F13H8.1	F13H8.1b.1	11.9405	5.61905	5.61905	0.702382	26.9767	17.1099	9.16435	0.702382	0.328409	0.613143	1	0.284734	none available
F13H8.11	WBGene00017443	F13H8.11	1d7c3e01-aa29-4df4-b112-397d2d31e2a5	6.41248	2.74821	2.74821	0.916069	33.168	5.81137	20.2134	7.1432	0.472902	0.135959	0.128243	-0.336942	none available
F13H8.11	WBGene00017443	F13H8.11	F13H8.11.1	23.881	1.40476	16.8572	5.61905	33.168	5.81137	20.2134	7.1432	0.241727	0.833958	0.786629	0.592231	none available
F13H8.4	WBGene00017437	nmgp-1	bf0e6e95-0594-485c-9a42-44f9e077507d	37.3693	23.3558	4.67116	9.34233	50.4154	33.9696	4.67116	11.7746	0.687551	1	0.793427	0.312449	F13H8.4 encodes a homolog of the human neuronal membrane glycoproteins Concise description: F13H8.4 encodes a homolog of the human neuronal membrane glycoproteins PLP1 (OMIM:300401, mutated in Pelizaeus-Merzbacher disease and spastic paraplegia), M6A (OMIM:601275), and M6B (OMIM:300051); the presence of a myelin-related protein in C. elegans is currently unexplained, but suggests that some evolut…
F13H8.5	WBGene00017438	F13H8.5	6a58fa97-c69b-48eb-a8f1-62434a180e53	16.3629	9.81774	5.4543	1.09086	50.3048	38.0062	11.2078	1.09086	0.258319	0.486653	1	0.228333	F13H8.5 encodes a protein with a domain of unknown function Concise description: F13H8.5 encodes a protein with a domain of unknown function (DB; IPR002602) that is found in several worm proteins, and a glutamine/asparagine-rich
F14B6.3	WBGene00008784	F14B6.3	555d362f-e14e-4a62-8c2f-fc32d0a1452b	50.0837	49.0616	1.02212	0	67.11	65.0853	2.0247	0	0.753805	0.504825		-0.24898	none available
F14B6.6	WBGene00008787	F14B6.6	04b77e5e-6d45-4270-9774-49d1b14529ac	3.69271	1.05506	1.05506	1.58259	17.8665	2.84783	6.56435	8.45432	0.370478	0.160726	0.187193	-0.209752	none available
F14B6.6	WBGene00008787	F14B6.6	99a90218-dd9d-40ec-bfe5-254319b27942	1.32672	0	1.32672	0	17.8665	2.84783	6.56435	8.45432	0	0.20211	0	0.20211	none available
F14B8.5	WBGene00017447	F14B8.5	b9e39be5-e8c2-4b84-a990-489501dbb8a0	18.3981	14.4556	1.31415	2.6283	98.1323	80.7676	3.02816	14.3365	0.178978	0.433976	0.18333	0.254998	none available
F14B8.5	WBGene00017447	F14B8.5	316b57f4-80c7-408d-85c2-d44fd406115c	1.36692	0	0.683462	0.683462	98.1323	80.7676	3.02816	14.3365	0	0.225702	0.047673	0.225702	none available
F14B8.6	WBGene00017448	F14B8.6	d0f47f16-1b60-4ee9-a67e-813fa7c292da	85.1337	32.9184	24.9725	27.2428	127.031	57.7624	32.4088	36.86	0.569893	0.770549	0.739087	0.200656	none available
F14B8.7	WBGene00017449	otpl-3	282eb8bf-bf1c-422f-83ba-53b3adce157b	1.99008	0.995041	0.995041	0	19.9008	3.44158	11.6704	4.78883	0.289123	0.0852619	0	-0.203862	otpl-3 encodes an ortholog of otopetrins such as human OTOP1 Concise description: otpl-3 encodes an ortholog of otopetrins such as human OTOP1 (OMIM:607806), OTOP2 (OMIM:607827), and OTOP3 (OMIM:607828), along with other homologs in fish and insects (such as crustacean OTOPLb); otopetrins are predicted to have 12 transmembrane helices; by homology with OTOP1 and OTOPLb, OTPL-3 might regulate intr…
F14B8.7	WBGene00017449	otpl-3	933a13bf-6e87-4f91-9b86-6039650aa12b	2.65344	0	2.65344	0	19.9008	3.44158	11.6704	4.78883	0	0.227365	0	0.227365	otpl-3 encodes an ortholog of otopetrins such as human OTOP1 Concise description: otpl-3 encodes an ortholog of otopetrins such as human OTOP1 (OMIM:607806), OTOP2 (OMIM:607827), and OTOP3 (OMIM:607828), along with other homologs in fish and insects (such as crustacean OTOPLb); otopetrins are predicted to have 12 transmembrane helices; by homology with OTOP1 and OTOPLb, OTPL-3 might regulate intr…
F14D12.5	WBGene00017464	sulp-2	28a4ff3e-4399-45d3-9f2a-2a1f7e133653	7.41988	0	5.39628	2.0236	33.168	0.688616	26.4517	6.0277	0	0.204005	0.335717	0.204005	sulp-2 encodes one of eight C. elegans members of the sulfate Concise description: sulp-2 encodes one of eight C. elegans members of the sulfate permease family of anion transporters; by homology, SULP-2 is predicted to function as an anion transporter that regulates cellular pH and volume via transmembrane movement of electrolytes and fluids and when expressed in Xenopus oocytes, SULP-2 does exh…
F14D12.5	WBGene00017464	sulp-2	8639af04-a27e-48c7-b056-dcb373b9912c	12.3951	0.688616	8.26339	3.44308	33.168	0.688616	26.4517	6.0277	1	0.312395	0.571209	-0.687605	sulp-2 encodes one of eight C. elegans members of the sulfate Concise description: sulp-2 encodes one of eight C. elegans members of the sulfate permease family of anion transporters; by homology, SULP-2 is predicted to function as an anion transporter that regulates cellular pH and volume via transmembrane movement of electrolytes and fluids and when expressed in Xenopus oocytes, SULP-2 does exh…
F14D2.1	WBGene00017450	bath-27	6d2bf8e4-e460-4b7a-ae76-e0d1a913c5aa	1.19405	0	0.398016	0.796033	15.39	4.92656	1.16751	9.29589	0	0.340909	0.0856327	0.340909	none available
F14D2.1	WBGene00017450	bath-27	4612c263-cf0b-4ed1-921d-8622b826e379	3.84749	1.539	0.769498	1.539	15.39	4.92656	1.16751	9.29589	0.312388	0.659091	0.165557	0.346703	none available
F14D2.1	WBGene00017450	bath-27	ddba89a5-f19a-4d18-9c76-c7fe72ffac19	1.92375	1.2825	0	0.641248	15.39	4.92656	1.16751	9.29589	0.260323	0	0.0689819	-0.260323	none available
F14D2.11	WBGene00017459	F14D2.11	268fb71e-4a35-4bd4-99ce-8b208040efae	9.95041	3.3168	2.2112	4.4224	38.2538	11.763	3.0404	23.4504	0.281969	0.727273	0.188586	0.445304	none available
F14D2.11	WBGene00017459	F14D2.11	F14D2.11.1	24.1021	5.07413	0	19.028	38.2538	11.763	3.0404	23.4504	0.431363	0	0.811414	-0.431363	none available
F14D7.2	WBGene00008789	F14D7.2	c10bd943-8e09-444f-817f-5c9c318a9fe0	89.3462	47.0243	1.88097	40.4409	141.304	77.2843	1.88097	62.1391	0.608459	1	0.650813	0.391541	none available
F14E5.1	WBGene00008799	F14E5.1	3a89e39b-bcc7-49f2-98f5-8f83eb987c17	0.928705	0.464352	0	0.464352	6.36826	1.19405	2.23331	2.9409	0.388889	0	0.157895	-0.388889	none available
F14E5.1	WBGene00008799	F14E5.1	34c7d811-e9db-471c-81ec-74f7b0b6f2e6	2.91879	0.729697	0.729697	1.45939	6.36826	1.19405	2.23331	2.9409	0.611111	0.326733	0.496241	-0.284378	none available
F14E5.1	WBGene00008799	F14E5.1	29942c37-3b6c-4d75-979f-45ead4b0fd8c	2.25543	0	1.50362	0.751809	6.36826	1.19405	2.23331	2.9409	0	0.673267	0.255639	0.673267	none available
F14F7.1	WBGene00000673	col-98	c02c9106-cc87-4aae-8e73-3368fd99bec3	1162.91	0.706078	260.543	901.662	2993.69	0.706078	742.676	2250.31	1	0.350816	0.400683	-0.649184	none available
F14F7.3	WBGene00008810	cyp-13A12	007e17bd-f79f-4b33-b0d2-85af598d05ef	5.97024	1.99008	2.98512	0.995041	9.28705	2.65344	5.63856	0.995041	0.75	0.529412	1	-0.220588	cyp-13A12 encodes one of ~80 C. elegans cytochrome P450s: membrane-associated, Concise description: cyp-13A12 encodes one of ~80 C. elegans cytochrome P450s: membrane-associated, heme-containing NADPH-dependent monooxygenases that catalyze the oxidative metabolism
F14F7.3	WBGene00008810	cyp-13A12	5785549d-7f38-4e39-a0ee-2ae67641c4fb	1.32672	0	1.32672	0	9.28705	2.65344	5.63856	0.995041	0	0.235294	0	0.235294	cyp-13A12 encodes one of ~80 C. elegans cytochrome P450s: membrane-associated, Concise description: cyp-13A12 encodes one of ~80 C. elegans cytochrome P450s: membrane-associated, heme-containing NADPH-dependent monooxygenases that catalyze the oxidative metabolism
F14F9.5	WBGene00017468	F14F9.5	f916f5a4-dfde-4d94-8da6-f144fd437b62	9.28705	5.30688	2.65344	1.32672	15.9207	6.63361	5.30688	3.98016	0.8	0.5	0.333333	-0.3	none available
F14F9.5	WBGene00017468	F14F9.5	F14F9.5.1	3.98016	0	1.32672	2.65344	15.9207	6.63361	5.30688	3.98016	0	0.25	0.666667	0.25	none available
F14H3.3	WBGene00008822	F14H3.3	136a788c-c21a-48c9-8762-8aee28425577	47.5408	26.4116	1.76077	19.3685	64.5671	34.1749	1.76077	28.6314	0.772835	1	0.676477	0.227165	none available
F14H3.5	WBGene00008824	F14H3.5	9b4074df-5e57-4769-8715-02530a1cb1dc	7.2559	4.23261	0	3.02329	38.2727	17.0274	2.07639	19.169	0.248577	0	0.157718	-0.248577	none available
F14H3.5	WBGene00008824	F14H3.5	3f97fd18-df57-4f52-a544-f10efee1def4	16.9852	6.29081	1.25816	9.43622	38.2727	17.0274	2.07639	19.169	0.369453	0.605938	0.492265	0.236485	none available
F14H8.6	WBGene00000562	cng-1	a42d3977-09ae-47af-813b-4bf27e3da589	1.87952	0	1.87952	0	8.95537	2.65344	6.30192	0	0	0.298246		0.298246	none available
F15A2.6	WBGene00004719	sad-1	b44eb351-fe6d-46df-b07a-41576f2dc96b	10.1399	6.08396	3.37998	0.675996	33.168	13.4926	17.614	2.06138	0.450911	0.191891	0.327933	-0.259019	sad-1 encodes a novel serine/threonine protein kinase; SAD-1 Concise description: sad-1 encodes a novel serine/threonine protein kinase; SAD-1 activity is required for several aspects of presynaptic development, including termination of axon outgrowth and presynaptic vesicle clustering, in GABAergic motor neurons and the ASI amphid chemosensory neuron; in addition, SAD-1 functions in a complex wi…
F15A4.10	WBGene00008844	F15A4.10	493779aa-86e8-449e-a867-04f5d7bba0bd	72.4169	47.9379	4.07982	20.3991	93.8655	63.2035	4.07982	26.5822	0.758469	1	0.767398	0.241531	none available
F15A4.5	WBGene00008840	F15A4.5	9f47d140-2bc1-49dc-be3f-59dd89907c3b	13.6311	0	12.1706	1.46047	58.3757	4.34729	48.9821	5.04637	0	0.24847	0.28941	0.24847	none available
F15A4.6	WBGene00008841	F15A4.6	b9b9f032-9c7d-49ab-8d63-3f6bde1891c6	421.681	1.18118	346.086	74.4144	727.812	1.46337	626.461	99.8872	0.807164	0.552446	0.744984	-0.254718	none available
F15A4.6	WBGene00008841	F15A4.6	4088e585-cc2b-4db8-a663-c0b7544e90ca	210.013	0	191.521	18.4917	727.812	1.46337	626.461	99.8872	0	0.305719	0.185126	0.305719	none available
F15B9.3	WBGene00001389	far-5	c8719cf1-2afb-48d2-9123-f41dba2b1eb1	59.5034	5.83367	24.5014	29.1684	66.5351	8.81879	25.8834	31.8328	0.661504	0.946607	0.916297	0.285102	far-5 encodes a member of a class of fatty acid-and retinol-binding Concise description: far-5 encodes a member of a class of fatty acid-and retinol-binding proteins that are known to be secreted by parasitic nematodes and plants; far-5 binds lipid in fluorescence-based assays, however, the precise function of far-5
F15B9.4	WBGene00008848	inft-2	61c83ebd-2357-4ce3-9fe8-81f71fcf782c	9.28705	4.64352	2.32176	2.32176	18.5741	10.7464	2.32176	5.50589	0.432099	1	0.421687	0.567901	none available
F15B9.4	WBGene00008848	inft-2	39955146-436f-43fb-a9db-c559a4dcbecf	2.65344	2.65344	0	0	18.5741	10.7464	2.32176	5.50589	0.246914	0	0	-0.246914	none available
F15D4.8	WBGene00001459	flp-16	fb764d07-18fe-4976-b5bd-21ddac7a3a64	19.2909	3.21515	16.0757	0	331.533	11.5937	288.272	31.6676	0.277319	0.055766	0	-0.221553	flp-16 encodes a predicted FMRFamide-like peptide neurotransmitter Concise description: flp-16 encodes a predicted FMRFamide-like peptide neurotransmitter that inhibits action potentials in the pharyngeal muscle when applied to the pharynx
F15E6.2	WBGene00017483	lgc-22	F15E6.2a.1	6.63361	0	3.98016	2.65344	196.169	168.704	17.6647	9.80067	0	0.225318	0.270741	0.225318	none available
F15E6.6	WBGene00017487	F15E6.6	a3518bab-50c9-4092-9321-0e327a36aefc	3.98016	0	0.995041	2.98512	15.9207	4.11836	2.84692	8.95537	0	0.349515	0.333333	0.349515	none available
F15H10.2	WBGene00000602	col-13	760a0766-eb98-4781-910e-45b4c676e4c0	1.32672	1.32672	0	0	60.6975	1.32672	7.4095	51.9613	1	0	0	-1	col-13 encodes a collagen which is expressed in all stages Concise description: col-13 encodes a collagen which is expressed in all stages of development, like sqt-3 (col-1), col-3, col-10, col-11, col-12, and col-14; collagen genes with this expression profile may be specifically required to construct the L1 cuticle (and, perhaps, less specifically required for cuticles at other stages); the ami…
F15H10.2	WBGene00000602	col-13	039076f9-d3cd-48fb-bdfa-3833190196cf	17.3579	0	2.3942	14.9637	60.6975	1.32672	7.4095	51.9613	0	0.323125	0.287979	0.323125	col-13 encodes a collagen which is expressed in all stages Concise description: col-13 encodes a collagen which is expressed in all stages of development, like sqt-3 (col-1), col-3, col-10, col-11, col-12, and col-14; collagen genes with this expression profile may be specifically required to construct the L1 cuticle (and, perhaps, less specifically required for cuticles at other stages); the ami…
F15H10.2	WBGene00000602	col-13	20f4cef1-26d3-44bb-9817-1bb44b5d8362	13.7095	0	2.19351	11.5159	60.6975	1.32672	7.4095	51.9613	0	0.29604	0.221625	0.29604	col-13 encodes a collagen which is expressed in all stages Concise description: col-13 encodes a collagen which is expressed in all stages of development, like sqt-3 (col-1), col-3, col-10, col-11, col-12, and col-14; collagen genes with this expression profile may be specifically required to construct the L1 cuticle (and, perhaps, less specifically required for cuticles at other stages); the ami…
F15H10.3	WBGene00000144	apc-10	f6f29cc1-66ec-4b09-b48f-cb4994076a27	91.0257	15.991	7.38046	67.6542	208.295	31.1499	10.2745	166.871	0.513356	0.718325	0.405429	0.20497	apc-10 encodes a homolog of the fission yeast anaphase promoting Concise description: apc-10 encodes a homolog of the fission yeast anaphase promoting complex subunit APC10; apc-10(RNAi) animals are generally unable to progress through meiotic divisions; initially they produce reduced numbers of viable embryos mixed with inviable embryos, but then show severe germline maintenance defects and beco…
F16B3.1	WBGene00001171	egl-2	53ece937-86d7-4607-80f8-31f518009930	4.09072	3.06804	1.02268	0	8.95537	7.93269	1.02268	0	0.38676	1		0.61324	egl-2 encodes a voltage-gated potassium channel that is the Concise description: egl-2 encodes a voltage-gated potassium channel that is the C. elegans homolog of ether-a-go-go (EAG); egl-2 activity is required for egg laying, muscle activation, defecation, mechanosensation, and chemosensation; egl-2 is expressed in the intestinal muscle, AFD, ALN, AQR, ASE, AWC, BAG, IL2, PLN, PQR, and URX neuro…
F16B3.1	WBGene00001171	egl-2	e1307f98-3013-4e14-9a29-8a5854e9c154	2.764	2.764	0	0	8.95537	7.93269	1.02268	0	0.348432	0		-0.348432	egl-2 encodes a voltage-gated potassium channel that is the Concise description: egl-2 encodes a voltage-gated potassium channel that is the C. elegans homolog of ether-a-go-go (EAG); egl-2 activity is required for egg laying, muscle activation, defecation, mechanosensation, and chemosensation; egl-2 is expressed in the intestinal muscle, AFD, ALN, AQR, ASE, AWC, BAG, IL2, PLN, PQR, and URX neuro…
F16B3.1	WBGene00001171	egl-2	F16B3.1a.1	2.10064	2.10064	0	0	8.95537	7.93269	1.02268	0	0.264808	0		-0.264808	egl-2 encodes a voltage-gated potassium channel that is the Concise description: egl-2 encodes a voltage-gated potassium channel that is the C. elegans homolog of ether-a-go-go (EAG); egl-2 activity is required for egg laying, muscle activation, defecation, mechanosensation, and chemosensation; egl-2 is expressed in the intestinal muscle, AFD, ALN, AQR, ASE, AWC, BAG, IL2, PLN, PQR, and URX neuro…
F16B3.2	WBGene00017502	F16B3.2	27f91a7d-9317-4e90-ae54-5ca4001f39fc	0.663361	0	0.663361	0	1.32672	0.663361	0.663361	0	0	1		1	none available
F16B3.2	WBGene00017502	F16B3.2	a874c680-f02b-40e8-adda-f4474d719888	0.663361	0.663361	0	0	1.32672	0.663361	0.663361	0	1	0		-1	none available
F16B4.11	WBGene00017512	nhr-179	e9494994-e1c2-49b7-806b-57d31d922373	0.663361	0.663361	0	0	7.65076	2.6387	2.50603	2.50603	0.251397	0	0	-0.251397	none available
F16B4.5	WBGene00017507	F16B4.5	684eba49-2eee-4619-b121-995f920202ab	5.85968	0.976614	4.88307	0	7.62865	2.19277	5.43587	0	0.445378	0.898305		0.452927	none available
F16B4.9	WBGene00017510	nhr-178	d2c1d153-2508-4bc1-91b7-a879039ee0e4	4.20128	0	3.15096	1.05032	11.3324	1.53863	7.97875	1.81503	0	0.394919	0.57868	0.394919	none available
F16C3.4	WBGene00044243	F16C3.4	31c13c19-8291-46d4-9222-aa217cd2e117	8.66791	0.963101	0.963101	6.74171	11.2771	2.40038	0.963101	7.91365	0.401228	1	0.851909	0.598772	none available
F16D3.7	WBGene00008890	ser-5	f3188928-4b72-41bb-9dc2-fd693559a039	6.41248	3.20624	3.20624	0	8.18145	3.20624	4.9752	0	1	0.644444		-0.355556	ser-5 encodes a biogenic amine receptor that is most closely Concise description: ser-5 encodes a biogenic amine receptor that is most closely related to mammalian serotonin/5-HT-6 receptors; SER-5 functions in the ASH chemosensory neurons to coordinate sensory input and locomotory behavior and in muscles to regulate serotonin's effects on egg laying; heterologously expressed ser-5 has no effect …
F16D3.7	WBGene00008890	ser-5	03df185c-7d7b-4b7a-b0ea-75f445d9d750	1.32672	0	1.32672	0	8.18145	3.20624	4.9752	0	0	0.266667		0.266667	ser-5 encodes a biogenic amine receptor that is most closely Concise description: ser-5 encodes a biogenic amine receptor that is most closely related to mammalian serotonin/5-HT-6 receptors; SER-5 functions in the ASH chemosensory neurons to coordinate sensory input and locomotory behavior and in muscles to regulate serotonin's effects on egg laying; heterologously expressed ser-5 has no effect …
F16F9.5	WBGene00003174	mec-10	e71bbcbd-e3d4-4ac0-871a-bbf5abda8057	1.76896	0.884481	0.884481	0	2.65344	1.76896	0.884481	0	0.5	1		0.5	The mec-10 gene encodes an amiloride-sensitive Na+ channel Concise description: The mec-10 gene encodes an amiloride-sensitive Na+ channel protein (degenerin) required to sense gentle mechanical stimuli (e.g. touch) along
F16F9.5	WBGene00003174	mec-10	477a1495-8375-4268-ab97-497ac176167b	0.44224	0.44224	0	0	2.65344	1.76896	0.884481	0	0.25	0		-0.25	The mec-10 gene encodes an amiloride-sensitive Na+ channel Concise description: The mec-10 gene encodes an amiloride-sensitive Na+ channel protein (degenerin) required to sense gentle mechanical stimuli (e.g. touch) along
F16F9.5	WBGene00003174	mec-10	77d5d1f8-ba38-47d7-9f99-7ef367b54be8	0.44224	0.44224	0	0	2.65344	1.76896	0.884481	0	0.25	0		-0.25	The mec-10 gene encodes an amiloride-sensitive Na+ channel Concise description: The mec-10 gene encodes an amiloride-sensitive Na+ channel protein (degenerin) required to sense gentle mechanical stimuli (e.g. touch) along
F16H11.1	WBGene00017530	F16H11.1	841c4702-85e3-41d6-9a50-1d6443de196f	9.95041	6.219	2.4876	1.2438	15.2573	8.87245	5.14104	1.2438	0.700935	0.483871	1	-0.217064	none available
F16H11.3	WBGene00017532	ent-5	89b09d51-4dbc-4c44-a016-729f4fd65442	15.2573	4.69455	1.17364	9.3891	20.5642	6.90575	1.17364	12.4848	0.679803	1	0.752044	0.320197	none available
F16H11.3	WBGene00017532	ent-5	bbb638a0-ad4e-4feb-b199-e986fa45984d	4.4224	2.2112	0	2.2112	20.5642	6.90575	1.17364	12.4848	0.320197	0	0.177112	-0.320197	none available
F16H6.1	WBGene00008891	clec-42	3d926a34-dc20-4741-a900-db5c826fc4ed	2.764	0.460667	2.30334	0	5.19632	1.41885	3.77747	0	0.324675	0.609756		0.285081	none available
F16H6.7	WBGene00008897	F16H6.7	f398e6d0-3585-4167-a41c-332df74de2fe	3.02198	0.755494	2.26648	0	19.9008	0.755494	14.3712	4.77409	1	0.15771	0	-0.84229	none available
F16H6.7	WBGene00008897	F16H6.7	994a3cd2-a9ca-433f-907b-718b5c2043da	7.1127	0	4.97889	2.13381	19.9008	0.755494	14.3712	4.77409	0	0.346448	0.446956	0.346448	none available
F17A2.5	WBGene00000461	ceh-40	c74903a5-666e-452c-8c0a-287fa98a8986	79.7138	71.2593	1.20779	7.24671	115.978	106.444	1.20779	8.32599	0.669455	1	0.870372	0.330545	ceh-40 encodes one of three C. elegans homeodomain proteins Concise description: ceh-40 encodes one of three C. elegans homeodomain proteins (CEH-20, CEH-40, and CEH-60) homologous to Extradenticle (Exd/Pbx); ceh-40 genetically interacts with ceh-20 and unc-62 during embryonic development: while loss of ceh-40 activity alone results in no significant embryonic lethality, loss of ceh-40 and ceh-20…
F17A2.5	WBGene00000461	ceh-40	7c267598-79a8-4b2f-a4e8-253bdb16e8db	22.6648	21.5855	0	1.07928	115.978	106.444	1.20779	8.32599	0.202788	0	0.129628	-0.202788	ceh-40 encodes one of three C. elegans homeodomain proteins Concise description: ceh-40 encodes one of three C. elegans homeodomain proteins (CEH-20, CEH-40, and CEH-60) homologous to Extradenticle (Exd/Pbx); ceh-40 genetically interacts with ceh-20 and unc-62 during embryonic development: while loss of ceh-40 activity alone results in no significant embryonic lethality, loss of ceh-40 and ceh-20…
F17A9.3	WBGene00017535	atf-8	33871cbc-b08b-4332-bfe1-33311e5bad99	14.7903	14.174	0.616263	0	107.464	105.862	1.60242	0	0.133892	0.384583		0.250691	none available
F17A9.5	WBGene00017537	F17A9.5	7894eb98-d5f9-4816-a35e-8553ffba7d11	65.5621	7.02451	10.5368	48.0008	80.93	11.6259	12.2452	57.0589	0.604211	0.860483	0.841251	0.256271	none available
F17A9.6	WBGene00017538	ceh-49	F17A9.6.1	30.5146	22.5543	0	7.96033	112.771	78.3387	0.668889	33.7636	0.287907	0	0.235766	-0.287907	ceh-49 encodes a divergent ONECUT class CUT homeobox protein Concise description: ceh-49 encodes a divergent ONECUT class CUT homeobox protein with a single N-terminal cut domain; CEH-49 has an atypical tyrosine residue at position 48 of its homeodomain rather than a phenylalanine or tryptophan residue; the cut domain may be a compact DNA-binding domain composed of alpha helices; phylogenetically…
F17A9.6	WBGene00017538	ceh-49	07b3a604-3149-4452-957d-5cc9f17b3ed7	64.3902	45.5024	0	18.8878	112.771	78.3387	0.668889	33.7636	0.580842	0	0.559412	-0.580842	ceh-49 encodes a divergent ONECUT class CUT homeobox protein Concise description: ceh-49 encodes a divergent ONECUT class CUT homeobox protein with a single N-terminal cut domain; CEH-49 has an atypical tyrosine residue at position 48 of its homeodomain rather than a phenylalanine or tryptophan residue; the cut domain may be a compact DNA-binding domain composed of alpha helices; phylogenetically…
F17A9.6	WBGene00017538	ceh-49	a3598a5f-b25c-48d3-aa1f-22aef58a4b1f	5.35111	2.67555	0.668889	2.00667	112.771	78.3387	0.668889	33.7636	0.0341536	1	0.0594327	0.965846	ceh-49 encodes a divergent ONECUT class CUT homeobox protein Concise description: ceh-49 encodes a divergent ONECUT class CUT homeobox protein with a single N-terminal cut domain; CEH-49 has an atypical tyrosine residue at position 48 of its homeodomain rather than a phenylalanine or tryptophan residue; the cut domain may be a compact DNA-binding domain composed of alpha helices; phylogenetically…
F17C11.12	WBGene00008923	F17C11.12	04b4a07b-3049-4005-9926-6f7cfb2d2d4c	33.1828	15.4853	8.84874	8.84874	62.9603	23.0913	27.2059	12.6631	0.670613	0.325251	0.69878	-0.345362	none available
F17C11.3	WBGene00000726	col-153	09b17d12-cd66-42c1-8bab-571fc4bc9d57	15.3826	0.854588	5.12753	9.40047	24.1979	0.854588	6.73434	16.609	1	0.761401	0.565987	-0.238599	none available
F17C11.6	WBGene00008917	F17C11.6	48aef678-1692-4ce9-81cb-dfcc2009c424	12.885	0	7.36285	5.52214	82.1967	3.03721	28.6489	50.5106	0	0.257003	0.109326	0.257003	none available
F17C11.6	WBGene00008917	F17C11.6	F17C11.6.2	21.6698	1.14051	4.56206	15.9672	82.1967	3.03721	28.6489	50.5106	0.375514	0.15924	0.316116	-0.216274	none available
F17C8.1	WBGene00000068	acy-1	F17C8.1.1	15.9207	2.89466	13.026	0	55.855	27.1081	27.3538	1.39306	0.106782	0.476203	0	0.369421	acy-1 encodes an adenylyl cyclase that is most closely related Concise description: acy-1 encodes an adenylyl cyclase that is most closely related to the divergent mouse isoform type IX; acy-1 is required for viability, muscle contraction, locomotion, molting, and regulation of sleep-like behavior (lethargus) during larval development; acy-1 acts genetically downstream of gsa-1 and is expressed
F17C8.9	WBGene00185014	F17C8.9	98f8b4bb-4ba1-4f22-80b6-2cf37659bb76	98.5217	16.6335	28.149	53.7391	128.471	25.5842	31.9915	70.8951	0.650149	0.879891	0.758009	0.229742	none available
F17E5.1	WBGene00002991	lin-2	631037c0-0329-4c74-b641-d511735523c0	3.48264	2.32176	0	1.16088	27.8611	7.93628	11.4397	8.48513	0.292551	0	0.136814	-0.292551	lin-2 encodes a protein belonging to the membrane associated Concise description: lin-2 encodes a protein belonging to the membrane associated guanylate kinase (MAGUK) family, with several domains (L27, PDZ, SH3, and guanylate kinase) thought to assemble specific multiprotein complexes in particular regions of the cell; in vivo, LIN-2 is required for the correct localization of LET-23 (and,
F18A1.8	WBGene00017549	pid-1	468671d5-1e50-4d83-96df-0e623a051fe9	144.097	43.1238	5.259	95.7138	191.895	60.4317	13.7965	117.667	0.713596	0.381184	0.813428	-0.332413	none available
F18A11.2	WBGene00008929	F18A11.2	feed365f-00b7-4f89-b6e1-9dce6333efc9	35.8215	33.168	2.65344	0	41.1284	37.0008	4.12758	0	0.896414	0.642857		-0.253557	none available
F18C5.2	WBGene00006944	wrn-1	8b809dac-3a54-49fd-8370-99ff2c908551	20.8422	0.801621	4.00811	16.0324	46.4352	2.90226	8.06762	35.4653	0.276206	0.496814	0.452059	0.220608	wrn-1 encodes an ortholog of human WRN, and one of four C. Concise description: wrn-1 encodes an ortholog of human WRN, and one of four C. elegans homologs of the RecQ DNA helicase family, that includes E. coli RecQ; by homology, WRN-1 is predicted to function as a helicase, DNA-dependent ATPase, and exonuclease that plays a key role in DNA replication, recombination, and repair; RNA interference…
F18C5.2	WBGene00006944	wrn-1	594abb3f-2aaf-430a-b8aa-da133fb55f56	5.74912	1.43728	0	4.31184	46.4352	2.90226	8.06762	35.4653	0.495228	0	0.121579	-0.495228	wrn-1 encodes an ortholog of human WRN, and one of four C. Concise description: wrn-1 encodes an ortholog of human WRN, and one of four C. elegans homologs of the RecQ DNA helicase family, that includes E. coli RecQ; by homology, WRN-1 is predicted to function as a helicase, DNA-dependent ATPase, and exonuclease that plays a key role in DNA replication, recombination, and repair; RNA interference…
F18C5.3	WBGene00007050	utp-20	d33e657d-8ebb-4968-86fc-59b08caf0381	3.98016	1.32672	1.32672	1.32672	14.5939	5.30688	2.65344	6.63361	0.25	0.5	0.2	0.25	none available
F18C5.3	WBGene00007050	utp-20	9d20f82d-2fbd-4ced-b106-e8db76f2e487	1.32672	1.32672	0	0	14.5939	5.30688	2.65344	6.63361	0.25	0	0	-0.25	none available
F18C5.3	WBGene00007050	utp-20	f429c244-41d9-4708-8096-b81cc5047010	1.32672	1.32672	0	0	14.5939	5.30688	2.65344	6.63361	0.25	0	0	-0.25	none available
F18C5.3	WBGene00007050	utp-20	496f16a0-404e-4dde-b4e7-794a5365ea49	5.30688	1.32672	1.32672	2.65344	14.5939	5.30688	2.65344	6.63361	0.25	0.5	0.4	0.25	none available
F18H3.5	WBGene00000406	cdk-4	430e55e2-8859-45a3-af30-49ea24344ce2	6.96529	6.96529	0	0	33.168	26.0764	5.50695	1.58469	0.267111	0	0	-0.267111	cdk-4 encodes two isoforms of a cyclin-dependent serine/threonine Concise description: cdk-4 encodes two isoforms of a cyclin-dependent serine/threonine protein kinase orthologous to human CDK4 and CDK6 (OMIM:123829 and OMIM:603368, mutated in cutanous malignant melanoma) which complex with D-type cyclins to regulate progression through the G1 phase of the cell cycle; CDK-4 activity is essential …
F19B10.1	WBGene00017583	F19B10.1	F19B10.1.1	27.4189	13.4048	7.31171	6.7024	62.7981	34.7776	12.4817	15.5388	0.385444	0.585793	0.431333	0.200349	none available
F19B10.1	WBGene00017583	F19B10.1	c8db70ea-40bc-4f80-8445-cee099a97650	21.2275	14.6397	2.19595	4.3919	62.7981	34.7776	12.4817	15.5388	0.420952	0.175933	0.282641	-0.245018	none available
F19B10.10	WBGene00017589	F19B10.10	e7a4fbc7-16e9-4232-a908-2bd127ff1706	37.104	19.8463	1.72577	15.5319	70.8027	41.4552	2.38913	26.9584	0.478742	0.722342	0.576143	0.2436	none available
F19B2.12	WBGene00194812	F19B2.12	F19B2.12	1.32672	0	0.663361	0.663361	7.69498	1.89721	1.37979	4.41798	0	0.480769	0.15015	0.480769	none available
F19B2.12	WBGene00194812	F19B2.12	f4f6dedd-9b9b-463e-b842-817a48d22e35	3.58215	1.43286	0.716429	1.43286	7.69498	1.89721	1.37979	4.41798	0.755245	0.519231	0.324324	-0.236014	none available
F19B2.12	WBGene00194812	F19B2.12	754b95e6-c3b0-4db3-a253-7f9bffdf00e9	0.928705	0.464352	0	0.464352	7.69498	1.89721	1.37979	4.41798	0.244755	0	0.105105	-0.244755	none available
F19C6.4	WBGene00008953	F19C6.4	dbf418c3-beec-4ede-ba6b-cf13401c50e6	7.29697	1.21616	1.21616	4.86464	10.6138	1.21616	3.8696	5.528	1	0.314286	0.88	-0.685714	F19C6.4 encodes a neprilysin; neprilysins are thermolysin-like Concise description: F19C6.4 encodes a neprilysin; neprilysins are thermolysin-like zinc metallopeptidases, found on the outer surface of animal cells, that negatively regulate small signalling peptides (e.g., enkephalin, tachykinin, insulin, and natriuretic
F19C6.4	WBGene00008953	F19C6.4	dab2a0e9-c7fa-4fe6-a070-8c3ad711a45b	1.99008	0	1.32672	0.663361	10.6138	1.21616	3.8696	5.528	0	0.342857	0.12	0.342857	F19C6.4 encodes a neprilysin; neprilysins are thermolysin-like Concise description: F19C6.4 encodes a neprilysin; neprilysins are thermolysin-like zinc metallopeptidases, found on the outer surface of animal cells, that negatively regulate small signalling peptides (e.g., enkephalin, tachykinin, insulin, and natriuretic
F19C6.4	WBGene00008953	F19C6.4	4ceb7f09-0b60-4967-97a5-dbe7c9997398	1.32672	0	1.32672	0	10.6138	1.21616	3.8696	5.528	0	0.342857	0	0.342857	F19C6.4 encodes a neprilysin; neprilysins are thermolysin-like Concise description: F19C6.4 encodes a neprilysin; neprilysins are thermolysin-like zinc metallopeptidases, found on the outer surface of animal cells, that negatively regulate small signalling peptides (e.g., enkephalin, tachykinin, insulin, and natriuretic
F19C7.8	WBGene00017597	F19C7.8	f3023c75-3523-494d-85ca-298f3223cd5b	4.64352	4.64352	0	0	46.7634	21.7192	21.7202	1.74702	0.213798	0	0	-0.213798	none available
F19C7.8	WBGene00017597	F19C7.8	e5659a1e-3e6c-403d-b752-30adce4077c5	5.30688	5.30688	0	0	46.7634	21.7192	21.7202	1.74702	0.24434	0	0	-0.24434	none available
F19H6.4	WBGene00008959	F19H6.4	F19H6.4.1	20.1219	13.0201	1.18364	5.91822	85.9052	55.4244	2.69095	27.7899	0.234916	0.439861	0.212963	0.204945	none available
F19H8.4	WBGene00008964	mltn-9	8453e37d-7165-4f46-b7d0-03662839063d	9.28705	9.28705	0	0	30.5146	26.5344	2.65344	1.32672	0.35	0	0	-0.35	none available
F19H8.4	WBGene00008964	mltn-9	fd64a54c-91cf-4fe8-89e2-d790a2dbcd12	3.98016	2.65344	1.32672	0	30.5146	26.5344	2.65344	1.32672	0.1	0.5	0	0.4	none available
F19H8.5	WBGene00008965	mltn-10	efc93304-6f73-4c4a-abee-7b1eea1ccb55	1.59207	0	0.796033	0.796033	5.30688	0.972929	2.56499	1.76896	0	0.310345	0.45	0.310345	none available
F19H8.5	WBGene00008965	mltn-10	cae3ea5f-2ee2-455c-b5f7-6bd981f87382	2.91879	0.972929	0.972929	0.972929	5.30688	0.972929	2.56499	1.76896	1	0.37931	0.55	-0.62069	none available
F20A1.10	WBGene00017621	F20A1.10	1925dedf-6265-4f03-9be0-e7a50d4ebcd5	60.1839	0	32.5996	27.5843	186.763	1.31363	98.6264	86.8231	0	0.330536	0.317707	0.330536	none available
F20A1.10	WBGene00017621	F20A1.10	377d2aaf-74e6-477e-894d-a8c129968006	2.07352	0.345586	1.03676	0.691172	186.763	1.31363	98.6264	86.8231	0.263077	0.010512	0.0079607	-0.252565	none available
F20B10.3	WBGene00008967	F20B10.3	F20B10.3.1	5.08576	4.35923	0.726538	0	10.1715	9.44499	0.726538	0	0.461538	1		0.538462	none available
F20B10.3	WBGene00008967	F20B10.3	eea71e2b-f393-4bf2-9d7e-8c7a3b753759	5.08576	5.08576	0	0	10.1715	9.44499	0.726538	0	0.538462	0		-0.538462	none available
F20B4.6	WBGene00017625	cgt-2	6cbd1411-021d-4d98-93ff-baf7d50262bf	4.4224	2.2112	0	2.2112	17.2474	4.45926	1.21616	11.572	0.495868	0	0.191083	-0.495868	cgt-2 encodes a transmembrane protein that is one of three Concise description: cgt-2 encodes a transmembrane protein that is one of three C. elegans ceramide glucosyltransferases; by homology, CGT-2 is predicted to localize to the Golgi membrane and catalyze the transfer of glucose from UDP-glucose to ceramide to synthesize glucosylceramide, a glycosphingolipid precursor; although cgt-2 mutant w…
F20B4.6	WBGene00017625	cgt-2	7227cebe-ab23-4745-a23c-fff07e91c3d2	3.09568	1.03189	0	2.06379	17.2474	4.45926	1.21616	11.572	0.231405	0	0.178344	-0.231405	cgt-2 encodes a transmembrane protein that is one of three Concise description: cgt-2 encodes a transmembrane protein that is one of three C. elegans ceramide glucosyltransferases; by homology, CGT-2 is predicted to localize to the Golgi membrane and catalyze the transfer of glucose from UDP-glucose to ceramide to synthesize glucosylceramide, a glycosphingolipid precursor; although cgt-2 mutant w…
F20B4.6	WBGene00017625	cgt-2	692dcb19-91ea-4786-8f6d-b20e1dfc3029	9.72929	1.21616	1.21616	7.29697	17.2474	4.45926	1.21616	11.572	0.272727	1	0.630573	0.727273	cgt-2 encodes a transmembrane protein that is one of three Concise description: cgt-2 encodes a transmembrane protein that is one of three C. elegans ceramide glucosyltransferases; by homology, CGT-2 is predicted to localize to the Golgi membrane and catalyze the transfer of glucose from UDP-glucose to ceramide to synthesize glucosylceramide, a glycosphingolipid precursor; although cgt-2 mutant w…
F20B6.3	WBGene00003412	mrp-6	103dbe52-7034-4c42-8f55-cc78982f603e	6.16925	2.24336	1.12168	2.80421	11.0781	2.93105	3.19726	4.94981	0.76538	0.350826	0.566528	-0.414554	none available
F20C5.2	WBGene00002222	klp-11	cad51eae-fc87-4fcd-b16d-9bebfb654d33	2.77405	1.84937	0.924684	0	20.7752	15.6226	2.32015	2.83248	0.118378	0.398545	0	0.280167	klp-11 encodes a kinesin motor protein that functions as a Concise description: klp-11 encodes a kinesin motor protein that functions as a subunit of C. elegans heterotrimeric kinesin-II; in vitro microtubule gliding assays demonstrate that purified kinesin-II and OSM-3, a homomeric kinesin-II motor, cooperatively generate movement similar to that seen along cilia lacking additional regulatory fa…
F20C5.4	WBGene00008969	F20C5.4	010631f8-73f5-49e3-b52f-c4a87c24a649	13.9306	1.26642	7.59849	5.06566	23.881	1.26642	16.2222	6.39238	1	0.468401	0.792453	-0.531599	none available
F20C5.4	WBGene00008969	F20C5.4	c04f1c8a-0121-4720-b00d-e9cc4a0ae0b6	7.96033	0	6.63361	1.32672	23.881	1.26642	16.2222	6.39238	0	0.408922	0.207547	0.408922	none available
F20C5.5	WBGene00008970	F20C5.5	f39e2913-9632-4a3b-9eb5-630f4eb828f5	3.36103	2.68882	0.672205	0	7.51809	6.84588	0.672205	0	0.392765	1		0.607235	none available
F20D1.5	WBGene00000191	arl-7	336343b2-9d0c-47a9-b827-7cf8db32696c	1.32672	1.32672	0	0	3.98016	1.32672	2.65344	0	1	0		-1	none available
F20D1.5	WBGene00000191	arl-7	be7b12b9-c49e-4e88-9723-7e69852357a7	2.65344	0	2.65344	0	3.98016	1.32672	2.65344	0	0	1		1	none available
F20D1.7	WBGene00008977	iglr-1	F20D1.7.1	0.663361	0	0.663361	0	3.98016	2.32176	1.6584	0	0	0.4		0.4	none available
F20D1.7	WBGene00008977	iglr-1	3ec8f390-f1b7-4bff-abdd-2068dee8d54e	0.663361	0.663361	0	0	3.98016	2.32176	1.6584	0	0.285714	0		-0.285714	none available
F20D1.9	WBGene00008979	slc-25A18.1	b4c2d5f4-1048-46a2-8706-57a99f36aa04	109.69	44.8733	7.47889	57.3381	229.08	82.4018	24.296	122.383	0.544567	0.307823	0.468515	-0.236744	none available
F20D1.9	WBGene00008979	slc-25A18.1	e3517bee-b0c8-4b04-8297-b13ae69bc2c0	79.0557	20.0275	14.7571	44.2712	229.08	82.4018	24.296	122.383	0.243046	0.607386	0.361744	0.364339	none available
F20D12.12	WBGene00249815	F20D12.12	252a6865-ca13-4320-ad2f-29265062fcab	3.98016	2.98512	0	0.995041	35.1581	14.2092	6.23559	14.7133	0.210084	0	0.0676285	-0.210084	none available
F20D12.12	WBGene00249815	F20D12.12	f8d16732-1f4a-412e-a919-6df79cfe6675	31.1779	11.2241	6.23559	13.7183	35.1581	14.2092	6.23559	14.7133	0.789916	1	0.932372	0.210084	none available
F20D12.3	WBGene00000242	bbs-2	F20D12.3.1	4.64352	3.8696	0.773921	0	9.28705	6.22822	3.05883	0	0.621302	0.253012		-0.36829	bbs-2 encodes a ciliary protein that is orthologous to human Concise description: bbs-2 encodes a ciliary protein that is orthologous to human BBS2; bbs-2 is expressed exclusively in ciliated sensory neurons at the transition zone and along the axoneme; BBS proteins are required for ciliary structure and function; BBS-2 along with other BBS proteins undergoes intraflagellar transport (IFT); loss …
F20D12.3	WBGene00000242	bbs-2	dc04cebe-628e-4529-8ef3-1dba61325b6b	0.663361	0	0.663361	0	9.28705	6.22822	3.05883	0	0	0.216867		0.216867	bbs-2 encodes a ciliary protein that is orthologous to human Concise description: bbs-2 encodes a ciliary protein that is orthologous to human BBS2; bbs-2 is expressed exclusively in ciliated sensory neurons at the transition zone and along the axoneme; BBS proteins are required for ciliary structure and function; BBS-2 along with other BBS proteins undergoes intraflagellar transport (IFT); loss …
F20D12.6	WBGene00000442	ceh-19	4f27d164-3e86-440c-9d27-0100d6990cad	9.06593	3.39972	3.39972	2.26648	14.5939	3.39972	6.38484	4.80936	1	0.532468	0.471264	-0.467532	ceh-19 encodes a homeobox protein similar to Bar-like homeoproteins Concise description: ceh-19 encodes a homeobox protein similar to Bar-like homeoproteins
F20D12.6	WBGene00000442	ceh-19	a49e1e1e-e222-4e9b-8da4-03cfc83f7cb7	3.75904	0	1.87952	1.87952	14.5939	3.39972	6.38484	4.80936	0	0.294372	0.390805	0.294372	ceh-19 encodes a homeobox protein similar to Bar-like homeoproteins Concise description: ceh-19 encodes a homeobox protein similar to Bar-like homeoproteins
F20G2.5	WBGene00008988	F20G2.5	3e64a630-f9b9-4c1f-b9a9-9b65783f9abf	3.98016	1.32672	2.65344	0	10.6138	5.63856	4.146	0.829201	0.235294	0.64	0	0.404706	none available
F20G2.5	WBGene00008988	F20G2.5	e304163a-a5ae-48d2-8f2d-b78d46127803	1.32672	1.32672	0	0	10.6138	5.63856	4.146	0.829201	0.235294	0	0	-0.235294	none available
F21A10.1	WBGene00008998	ncs-4	bfda83f8-5a1f-4e21-9ffe-bd6abf5e8ec1	7.44438	1.86109	1.86109	3.72219	14.5939	2.52446	3.99859	8.07089	0.737226	0.465438	0.461187	-0.271788	none available
F21A10.1	WBGene00008998	ncs-4	4430b756-2071-4e10-a06e-55482b79b95d	1.32672	0	1.32672	0	14.5939	2.52446	3.99859	8.07089	0	0.331797	0	0.331797	none available
F21A10.1	WBGene00008998	ncs-4	F21A10.1a.1	1.99008	0.663361	0	1.32672	14.5939	2.52446	3.99859	8.07089	0.262774	0	0.164384	-0.262774	none available
F21A3.6	WBGene00008996	glb-14	dc47988e-e155-4c87-af6a-a2af222c1399	1.32672	1.32672	0	0	2.65344	1.32672	1.32672	0	1	0		-1	glb-14 encodes a globin with no obvious function in mass RNAi Concise description: glb-14 encodes a globin with no obvious function in mass RNAi assays; glb-14 expression is induced by anoxia in a HIF-1 dependent manner, although it is also paradoxically upregulated in a hif-1 mutant background; glb-14 is downregulated
F21A3.6	WBGene00008996	glb-14	49282d38-9de9-4dd4-bf24-e1cbbf853da0	1.32672	0	1.32672	0	2.65344	1.32672	1.32672	0	0	1		1	glb-14 encodes a globin with no obvious function in mass RNAi Concise description: glb-14 encodes a globin with no obvious function in mass RNAi assays; glb-14 expression is induced by anoxia in a HIF-1 dependent manner, although it is also paradoxically upregulated in a hif-1 mutant background; glb-14 is downregulated
F21A3.7	WBGene00008997	lgc-31	368ed900-8ac9-45a9-a714-5c85dd873cbf	15.4784	3.09568	9.28705	3.09568	25.2077	6.33878	12.5301	6.33878	0.488372	0.741176	0.488372	0.252804	none available
F21C10.13	WBGene00195086	F21C10.13	caf1fd18-ee15-41fc-a74a-29a9f89f9bfe	5.97024	1.19405	4.7762	0	7.96033	1.19405	6.76628	0	1	0.705882		-0.294118	none available
F21C10.13	WBGene00195086	F21C10.13	b1d8c259-3864-4316-9822-037afc36b6d3	1.99008	0	1.99008	0	7.96033	1.19405	6.76628	0	0	0.294118		0.294118	none available
F21D9.6	WBGene00009020	F21D9.6	5d5ef9d7-d086-4d4e-82e5-7a976dad7c36	18.353	17.1294	1.22353	0	31.3991	30.1755	1.22353	0	0.56766	1		0.43234	This gene encodes a protein containing an F-box, a motif predicted Concise description: This gene encodes a protein containing an F-box, a motif predicted to mediate protein-protein interactions either with homologs of yeast Skp-1p or
F21D9.6	WBGene00009020	F21D9.6	5e515465-cc11-4a4d-a5e1-0ea1addaa6df	10.6138	10.6138	0	0	31.3991	30.1755	1.22353	0	0.351734	0		-0.351734	This gene encodes a protein containing an F-box, a motif predicted Concise description: This gene encodes a protein containing an F-box, a motif predicted to mediate protein-protein interactions either with homologs of yeast Skp-1p or
F21E9.2	WBGene00017666	F21E9.2	800b990a-a7d5-4be5-a62a-c8fe4f54cdf6	1.99008	0.995041	0.995041	0	3.3168	2.32176	0.995041	0	0.428571	1		0.571429	none available
F21E9.2	WBGene00017666	F21E9.2	eb40a8c8-1640-4e8a-b603-203c7aff4840	1.32672	1.32672	0	0	3.3168	2.32176	0.995041	0	0.571429	0		-0.571429	none available
F21G4.1	WBGene00009023	F21G4.1	F21G4.1.2	6.19136	3.43965	2.06379	0.687929	8.73425	4.82165	2.06379	1.84881	0.713376	1	0.372093	0.286624	none available
F21G4.5	WBGene00009026	F21G4.5	fec82e17-eba3-4f76-87a1-bff72128494f	1.32672	0	1.32672	0	5.04154	2.12275	2.12275	0.796033	0	0.625	0	0.625	none available
F21G4.5	WBGene00009026	F21G4.5	7c7e3e0d-402b-4eaa-8e97-e7a04be3d297	1.59207	0.796033	0	0.796033	5.04154	2.12275	2.12275	0.796033	0.375	0	1	-0.375	none available
F21H12.5	WBGene00001402	fbf-2	F21H12.5.1	9.28705	0	1.32672	7.96033	15.9207	1.32672	1.32672	13.2672	0	1	0.6	1	fbf-2 encodes an RNA-binding protein that is one of 11 C. elegans Concise description: fbf-2 encodes an RNA-binding protein that is one of 11 C. elegans members of the PUF family (Pumilio and FBF) of translational regulators; FBF-2 is nearly identical to FBF-1 with which it is largely redundant in regulating two aspects of germline development: 1)maintenance of stem cell proliferation, and 2)the …
F21H12.5	WBGene00001402	fbf-2	ec38d30c-c55b-4365-8714-031b3579066c	1.32672	1.32672	0	0	15.9207	1.32672	1.32672	13.2672	1	0	0	-1	fbf-2 encodes an RNA-binding protein that is one of 11 C. elegans Concise description: fbf-2 encodes an RNA-binding protein that is one of 11 C. elegans members of the PUF family (Pumilio and FBF) of translational regulators; FBF-2 is nearly identical to FBF-1 with which it is largely redundant in regulating two aspects of germline development: 1)maintenance of stem cell proliferation, and 2)the …
F21H7.3	WBGene00009029	F21H7.3	F21H7.3.1	8.29201	8.29201	0	0	34.8264	31.5272	1.38639	1.91286	0.263011	0	0	-0.263011	none available
F22A3.1	WBGene00017687	ets-4	f9b456fb-417e-4c68-b9c0-4fbc95c654a0	26.3923	16.0649	5.73745	4.58996	46.4352	21.858	12.3225	12.2547	0.734965	0.465606	0.374547	-0.269359	none available
F22A3.6	WBGene00017691	ilys-5	d999f157-749b-45ef-b59d-f42ebf94ffb8	117.462	0.499838	4.99838	111.964	4169.01	0.499838	88.8651	4079.65	1	0.0562468	0.0274445	-0.943753	none available
F22B7.13	WBGene00001688	gpr-1	0b65f258-5205-4db4-8163-de2402038372	54.3956	35.3571	1.81319	17.2253	71.6429	48.8052	1.81319	21.0245	0.724453	1	0.819294	0.275547	gpr-1 encodes an extremely similar (97% identity) paralog of Concise description: gpr-1 encodes an extremely similar (97% identity) paralog of GPR-2; GPR-1 (and GPR-2) proteins have two N-terminal tetratricopeptide-like motifs and a C-terminal GoLoco/GPR (G protein regulatory) motif, the latter of which has also been found in mammalian AGS3 and Drosophila Pins; GPR-1 is required for normally asym…
F22B7.7	WBGene00006662	twk-7	d225c512-e272-4bae-8020-2dced90ae6ba	15.4563	1.93204	10.6262	2.89806	31.5096	2.80767	23.5131	5.18886	0.688128	0.451927	0.558515	-0.2362	none available
F22B7.7	WBGene00006662	twk-7	fc063374-0463-4398-b9d3-f9f812946342	2.18909	0.875636	1.31345	0	31.5096	2.80767	23.5131	5.18886	0.311872	0.0558605	0	-0.256012	none available
F22B7.7	WBGene00006662	twk-7	e65a5773-e2d1-4c36-bd81-7f31911b635c	9.28705	0	7.73921	1.54784	31.5096	2.80767	23.5131	5.18886	0	0.329145	0.298301	0.329145	none available
F22B8.6	WBGene00009048	cth-1	F22B8.6a.2	73.0523	19.6159	12.1754	41.261	125.049	46.4666	18.2905	60.2921	0.42215	0.665668	0.684352	0.243518	cth-1 encodes a putative cystathionine gamma-lyase; CTH-1 is Concise description: cth-1 encodes a putative cystathionine gamma-lyase; CTH-1 is orthologous to human CTH (OMIM:607657, mutated in cystathioninuria), extremely similar to its paralog CTH-2, and also paralogous to CBL-1; either CTH-1, or CTH-2, or both
F22D3.9	WBGene00199918	mir-8192	ec97d407-4510-4652-b1c0-20c60a39712d	5.97024	4.9752	0.995041	0	7.96033	6.96529	0.995041	0	0.714286	1		0.285714	none available
F22D3.9	WBGene00199918	mir-8192	f6e3115a-d3d6-4df7-b9d8-8286966a04e7	1.99008	1.99008	0	0	7.96033	6.96529	0.995041	0	0.285714	0		-0.285714	none available
F22D6.5	WBGene00004186	prpf-4	6553a183-4230-4f71-9baf-2d2d657bd99d	111.688	31.9108	9.97212	69.8049	196.355	66.9465	12.4532	116.955	0.476661	0.80077	0.596852	0.324109	none available
F22D6.8	WBGene00043279	F22D6.8	5c6c233b-b32d-404f-bcc3-5ee6a2fff3de	4.86464	0	3.64848	1.21616	37.1482	4.56698	12.6832	19.898	0	0.287662	0.0611198	0.287662	none available
F22D6.8	WBGene00043279	F22D6.8	0c906135-01cc-4925-9d63-7e6382022264	1.32672	1.32672	0	0	37.1482	4.56698	12.6832	19.898	0.290503	0	0	-0.290503	none available
F22D6.9	WBGene00009054	F22D6.9	e72b461f-18b2-405d-9ffc-ca18d1ac4945	21.1915	1.32447	2.64894	17.2181	51.5431	1.32447	10.4062	39.8124	1	0.254553	0.432481	-0.745447	none available
F22D6.9	WBGene00009054	F22D6.9	0e9eeaab-19b0-416f-a5e4-9055c56519dd	8.58766	0	2.25991	6.32775	51.5431	1.32447	10.4062	39.8124	0	0.217169	0.158939	0.217169	none available
F22E5.13	WBGene00017711	F22E5.13	9a2e461d-381d-472e-8d98-1b309fc61868	14.1517	3.85955	7.7191	2.57303	17.2474	6.95523	7.7191	2.57303	0.554913	1	1	0.445087	none available
F22E5.13	WBGene00017711	F22E5.13	8acf9173-f6b2-41cb-ada6-dde970352987	2.2112	2.2112	0	0	17.2474	6.95523	7.7191	2.57303	0.317919	0	0	-0.317919	none available
F22E5.17	WBGene00017712	F22E5.17	F22E5.17.1	51.7421	22.1752	0.821303	28.7456	70.9796	31.7465	0.821303	38.4117	0.698507	1	0.748355	0.301493	none available
F22E5.17	WBGene00017712	F22E5.17	2b2b4f20-b4d9-4cfc-a7d6-bb84d88ba57b	17.2474	9.23966	0	8.00771	70.9796	31.7465	0.821303	38.4117	0.291045	0	0.20847	-0.291045	none available
F22F4.9	WBGene00271606	F22F4.9	af6525f7-1e2a-4a79-99dd-a396e694d014	9.06593	5.18053	1.29513	2.59026	16.1418	8.27621	3.50633	4.35923	0.625954	0.369369	0.594203	-0.256585	none available
F22F4.9	WBGene00271606	F22F4.9	f1fc3621-2978-452d-b8b0-551483c54961	1.32672	0	1.32672	0	16.1418	8.27621	3.50633	4.35923	0	0.378378	0	0.378378	none available
F22F7.2	WBGene00017720	F22F7.2	c12821c7-8ba3-4518-bfef-b42659e799ec	1.6584	1.6584	0	0	9.28705	5.63856	2.43232	1.21616	0.294118	0	0	-0.294118	none available
F22G12.4	WBGene00009064	F22G12.4	64dde951-46b7-4f97-a463-288f9958e0af	2.10064	1.57548	0	0.52516	18.5741	6.70547	6.67783	5.1908	0.234955	0	0.101171	-0.234955	none available
F23B12.4	WBGene00009081	F23B12.4	2090d157-7ff3-4a61-a07e-d248f062cf92	5.10156	2.26736	0	2.8342	173.232	5.25702	31.2194	136.755	0.431302	0	0.0207246	-0.431302	none available
F23B2.4	WBGene00000906	daf-10	87b4d330-314c-4710-a3ac-71cddf0278a9	2.98512	0.995041	0.995041	0.995041	7.96033	4.9752	0.995041	1.99008	0.2	1	0.5	0.8	daf-10 encodes a WD- and WAA-repeat containing protein that Concise description: daf-10 encodes a WD- and WAA-repeat containing protein that is the C. elegans ortholog of intraflagellar transport (IFT) complex A component IFT122; daf-10 activity is required for intraflagellar transport and thus for proper development of amphid and phasmid neurons, dauer development, chemotaxis, and normal lifespa…
F23B2.4	WBGene00000906	daf-10	21348330-40bd-45a1-aada-b52552e400d2	3.98016	3.98016	0	0	7.96033	4.9752	0.995041	1.99008	0.8	0	0	-0.8	daf-10 encodes a WD- and WAA-repeat containing protein that Concise description: daf-10 encodes a WD- and WAA-repeat containing protein that is the C. elegans ortholog of intraflagellar transport (IFT) complex A component IFT122; daf-10 activity is required for intraflagellar transport and thus for proper development of amphid and phasmid neurons, dauer development, chemotaxis, and normal lifespa…
F23C8.13	WBGene00017741	F23C8.13	429c3033-9de2-4a55-89e8-58bdde57e947	1.32672	0	1.32672	0	5.30688	1.32672	3.98016	0	0	0.333333		0.333333	none available
F23C8.13	WBGene00017741	F23C8.13	506e13b4-d88c-418e-a8fc-06494f512b3f	2.65344	1.32672	1.32672	0	5.30688	1.32672	3.98016	0	1	0.333333		-0.666667	none available
F23C8.14	WBGene00255457	F23C8.14	33a3f24e-2c5c-4a5d-8127-4f1fa484cc23	0.884481	0.884481	0	0	7.73921	2.59816	3.42736	1.71368	0.340426	0	0	-0.340426	none available
F23C8.14	WBGene00255457	F23C8.14	f43a7436-40cd-4dc5-acf6-982a738808ef	6.85473	1.71368	3.42736	1.71368	7.73921	2.59816	3.42736	1.71368	0.659574	1	1	0.340426	none available
F23C8.9	WBGene00017738	tipn-1	bb5e6166-70ff-4e1d-8bd1-567462302a65	119.061	42.9943	7.71693	68.3499	153.972	62.3307	7.71693	83.9241	0.689777	1	0.814426	0.310223	none available
F23D12.3	WBGene00009087	F23D12.3	a7099f29-9090-483b-9c66-e0ffc0356df5	6.63361	1.6584	4.9752	0	58.3757	1.6584	38.5377	18.1797	1	0.1291	0	-0.8709	none available
F23D12.3	WBGene00009087	F23D12.3	f9a7ad8b-e7ae-46b4-ac2a-614456e97546	51.7421	0	33.5625	18.1797	58.3757	1.6584	38.5377	18.1797	0	0.8709	1	0.8709	none available
F23D12.6	WBGene00009090	fipr-3	de23d161-da15-4bcf-945b-d6965926de56	24.0137	3.07867	0.615735	20.3192	45.6392	5.9256	1.94246	37.7712	0.519555	0.316988	0.537957	-0.202567	none available
F23D12.6	WBGene00009090	fipr-3	6ba59f6e-85e3-49a9-949a-05e6c5690d9b	16.0533	2.00667	0	14.0467	45.6392	5.9256	1.94246	37.7712	0.338644	0	0.371889	-0.338644	none available
F23D12.6	WBGene00009090	fipr-3	1cf45507-4a5b-48fa-a3fe-0279fa3a963a	1.32672	0	1.32672	0	45.6392	5.9256	1.94246	37.7712	0	0.683012	0	0.683012	none available
F23F1.6	WBGene00017747	F23F1.6	f3042b8f-fd23-4184-9479-277cb34d08b6	2.764	0.691001	1.382	0.691001	9.28705	0.691001	6.13608	2.45996	1	0.225225	0.280899	-0.774775	none available
F23F1.6	WBGene00017747	F23F1.6	a11662df-ef4f-47ff-857f-33333d0e0866	2.764	0	1.382	1.382	9.28705	0.691001	6.13608	2.45996	0	0.225225	0.561798	0.225225	none available
F23F1.6	WBGene00017747	F23F1.6	8a08ab43-5690-4657-8ff0-4e2423c06a7b	2.65344	0	2.65344	0	9.28705	0.691001	6.13608	2.45996	0	0.432432	0	0.432432	none available
F23F1.7	WBGene00017748	F23F1.7	17b828c3-b691-44cc-8777-8b15261de7e6	21.4092	2.00711	6.69037	12.7117	68.1445	3.35401	28.7288	36.0617	0.59842	0.23288	0.352499	-0.36554	none available
F23F1.7	WBGene00017748	F23F1.7	54500b3f-0c96-460e-adc5-17d4d2c8bed0	15.9917	0	9.77272	6.219	68.1445	3.35401	28.7288	36.0617	0	0.340172	0.172455	0.340172	none available
F23F1.7	WBGene00017748	F23F1.7	3f9cb96b-33cd-4b5d-a8a4-c59c4e2fb3bd	12.1221	1.3469	4.04071	6.73451	68.1445	3.35401	28.7288	36.0617	0.40158	0.14065	0.18675	-0.260929	none available
F23F12.9	WBGene00017755	zip-8	778ae9a8-9c6a-42ca-bb56-d4dff558bfd6	82.4552	81.8305	0.624661	0	290.154	277.377	12.7769	0	0.295015	0.0488899		-0.246125	zip-8 encodes a bZip family transcription factor; the tm721 Concise description: zip-8 encodes a bZip family transcription factor; the tm721 variation that affects zip-8 has been reported to result in lethality; a zip-8::gfp
F23H11.2	WBGene00017758	F23H11.2	d3f0f3a0-dde5-43af-942f-21fbfd0148d2	15.6995	4.18654	3.13991	8.37308	34.4947	7.93821	12.6016	13.4242	0.527391	0.249167	0.62373	-0.278224	none available
F23H12.1	WBGene00004898	snb-2	F23H12.1.1	33.168	0	22.803	10.365	57.7124	0.964888	40.5376	16.2099	0	0.562516	0.639424	0.562516	none available
F23H12.1	WBGene00004898	snb-2	F23H12.1.2	11.9405	0	9.13096	2.80953	57.7124	0.964888	40.5376	16.2099	0	0.225247	0.173322	0.225247	none available
F23H12.1	WBGene00004898	snb-2	3fbeb184-7284-40aa-8fe1-c7954cc1748c	10.6138	0.964888	7.7191	1.92978	57.7124	0.964888	40.5376	16.2099	1	0.190419	0.119049	-0.809581	none available
F23H12.7	WBGene00009095	F23H12.7	02af8cc0-2a83-465b-a6d7-bdb94d8516c5	1.92375	1.2825	0.641248	0	10.6138	9.97252	0.641248	0	0.128603	1		0.871397	none available
F23H12.7	WBGene00009095	F23H12.7	0265c229-9923-4544-8476-64f9a6948cb3	5.90391	5.90391	0	0	10.6138	9.97252	0.641248	0	0.592018	0		-0.592018	none available
F23H12.9	WBGene00009097	fipr-2	5cb4ec73-c3e3-46f0-b33f-76102f2aca1c	644.871	4.13379	402.011	238.726	1323.87	5.7093	930.301	387.863	0.724045	0.43213	0.615492	-0.291915	none available
F23H12.9	WBGene00009097	fipr-2	99793751-be83-413d-a620-ccca0e9d14f8	284.644	0	200.832	83.8118	1323.87	5.7093	930.301	387.863	0	0.215879	0.216086	0.215879	none available
F25B3.3	WBGene00009100	rgef-1	a400d98f-3d0b-4e59-87bf-ce4901a2e152	2.2112	0.5528	1.6584	0	3.09568	0.5528	2.54288	0	1	0.652174		-0.347826	rgef-1 encodes a Ca2+-regulated Ras nucleotide exchange factor Concise description: rgef-1 encodes a Ca2+-regulated Ras nucleotide exchange factor orthologous to human Ras guanyl-releasing protein (RasGRP); rgef-1 reporter fusions are expressed in post-mitotic neurons (pan-neuronally) beginning at the late comma
F25B3.3	WBGene00009100	rgef-1	F25B3.3b.1	0.884481	0	0.884481	0	3.09568	0.5528	2.54288	0	0	0.347826		0.347826	rgef-1 encodes a Ca2+-regulated Ras nucleotide exchange factor Concise description: rgef-1 encodes a Ca2+-regulated Ras nucleotide exchange factor orthologous to human Ras guanyl-releasing protein (RasGRP); rgef-1 reporter fusions are expressed in post-mitotic neurons (pan-neuronally) beginning at the late comma
F25B3.5	WBGene00009102	F25B3.5	afbf2583-c6bc-47ba-8b31-09a659561d4d	1.32672	0.44224	0	0.884481	3.98016	0.884481	1.32672	1.76896	0.5	0	0.5	-0.5	none available
F25B3.5	WBGene00009102	F25B3.5	2aaa286b-2de9-4922-8647-cbc4614b39b8	1.32672	0.44224	0	0.884481	3.98016	0.884481	1.32672	1.76896	0.5	0	0.5	-0.5	none available
F25B3.5	WBGene00009102	F25B3.5	5b7f9ecf-ec96-4a52-8157-8f0d774d9686	1.32672	0	1.32672	0	3.98016	0.884481	1.32672	1.76896	0	1	0	1	none available
F25B4.9	WBGene00017772	clec-1	ee4c37cf-6c46-40a8-a87b-1725d656dd60	339.12	0	56.3017	282.818	671.173	2.23392	145.174	523.765	0	0.387822	0.539971	0.387822	none available
F25B4.9	WBGene00017772	clec-1	5a7f4d83-7ecd-4a34-b2cf-34c1df92dfea	130.684	2.23392	29.041	99.4095	671.173	2.23392	145.174	523.765	1	0.200043	0.189798	-0.799957	none available
F25C8.2	WBGene00000139	amx-3	629e03b9-75c9-4e3e-88d4-22a38b056b04	1.32672	0	1.32672	0	21.2275	11.5787	6.12101	3.52787	0	0.216749	0	0.216749	none available
F25E2.1	WBGene00017779	gtr-1	e402e833-b7f7-46cd-9e3d-d8579da9c2b7	5.30688	1.32672	3.98016	0	6.63361	1.32672	5.30688	0	1	0.75		-0.25	none available
F25E2.1	WBGene00017779	gtr-1	5258bf0e-1f43-43f0-ab53-43b63080bc72	1.32672	0	1.32672	0	6.63361	1.32672	5.30688	0	0	0.25		0.25	none available
F25E2.3	WBGene00017781	F25E2.3	fec14597-f698-49ff-908c-b7ed6df44a5b	22.9302	5.45956	13.1029	4.36765	50.4154	7.91906	33.9172	8.5791	0.68942	0.386321	0.509104	-0.303099	none available
F25E5.16	WBGene00017792	F25E5.16	0557550f-ef48-4613-893b-475fee0864ec	1.32672	1.32672	0	0	3.3168	2.32176	0.995041	0	0.571429	0		-0.571429	none available
F25E5.16	WBGene00017792	F25E5.16	18fa651a-f5e9-4550-b2a6-060c09284d12	1.99008	0.995041	0.995041	0	3.3168	2.32176	0.995041	0	0.428571	1		0.571429	none available
F25E5.4	WBGene00017785	F25E5.4	a05e61e9-1833-459f-9b3d-305ebdae2f66	2.15592	0	2.15592	0	13.1014	2.04536	8.40257	2.65344	0	0.256579	0	0.256579	none available
F25E5.6	WBGene00017787	nhr-141	f52c5356-51d2-48bb-9cca-7b02ac42b7fa	4.64352	2.32176	1.16088	1.16088	5.30688	2.98512	1.16088	1.16088	0.777778	1	1	0.222222	none available
F25E5.6	WBGene00017787	nhr-141	bbca25db-1c61-48cc-b343-8a4c569fbd32	0.663361	0.663361	0	0	5.30688	2.98512	1.16088	1.16088	0.222222	0	0	-0.222222	none available
F25G6.3	WBGene00000055	acr-16	32fa81a6-89ae-4824-98c8-cc82beb5a9e9	2.65344	2.65344	0	0	3.98016	2.65344	1.32672	0	1	0		-1	acr-16 encodes an alpha-7-like homomer-forming subunit of the Concise description: acr-16 encodes an alpha-7-like homomer-forming subunit of the nicotinic acetylcholine receptor (nAChR) superfamily orthologous to human nicotinic cholinergic receptor alpha 7 (CHRNA7; OMIM:118511; possibly associated with schizophrenia and juvenile myoclonic epilepsy); ACR-16 functions as a ligand-gated ion channel…
F25G6.3	WBGene00000055	acr-16	F25G6.3.1	1.32672	0	1.32672	0	3.98016	2.65344	1.32672	0	0	1		1	acr-16 encodes an alpha-7-like homomer-forming subunit of the Concise description: acr-16 encodes an alpha-7-like homomer-forming subunit of the nicotinic acetylcholine receptor (nAChR) superfamily orthologous to human nicotinic cholinergic receptor alpha 7 (CHRNA7; OMIM:118511; possibly associated with schizophrenia and juvenile myoclonic epilepsy); ACR-16 functions as a ligand-gated ion channel…
F25G6.6	WBGene00003816	asns-1	373b66e7-af3b-4294-b364-dff1dc28c25c	0.44224	0	0.44224	0	4.9752	2.8027	0.906593	1.26591	0	0.487805	0	0.487805	asns-1 encodes a predicted asparagine synthase (glutamine-hydrolysing); Concise description: asns-1 encodes a predicted asparagine synthase (glutamine-hydrolysing);
F25G6.6	WBGene00003816	asns-1	e5de0200-3e95-4bf5-a45b-ae61071009c6	1.87952	1.40964	0	0.46988	4.9752	2.8027	0.906593	1.26591	0.502959	0	0.371179	-0.502959	asns-1 encodes a predicted asparagine synthase (glutamine-hydrolysing); Concise description: asns-1 encodes a predicted asparagine synthase (glutamine-hydrolysing);
F25H2.13	WBGene00009124	rtel-1	bd6afa40-5c80-41c4-beff-55eea63d85f3	50.5857	11.146	4.28692	35.1527	81.9692	17.8233	10.9579	53.1879	0.625359	0.391217	0.660916	-0.234142	none available
F25H8.2	WBGene00009132	F25H8.2	1e0e3693-e450-4942-8bb1-4b645bd21707	27.2034	15.0334	6.44291	5.72703	87.5636	50.1583	12.6515	24.7538	0.29972	0.509259	0.23136	0.209539	none available
F26A3.3	WBGene00001214	ego-1	dc9bf961-da25-4cb7-9d53-7564bbba873a	11.056	0.850462	1.70092	8.50462	14.8151	0.850462	2.40114	11.5635	1	0.708383	0.735474	-0.291617	ego-1 encodes a homolog of RNA-directed RNA polymerase; ego-1 Concise description: ego-1 encodes a homolog of RNA-directed RNA polymerase; ego-1 is essential for several aspects of germline development such as proliferation, heterochromatin assembly on unpaired DNA during meiosis, and gametogenesis; ego-1
F26C11.2	WBGene00006744	unc-4	2d56824e-0a21-4340-9d20-0937505c49b5	11.9405	2.65344	1.32672	7.96033	13.2672	2.65344	2.65344	7.96033	1	0.5	1	-0.5	The unc-4 gene encodes a paired-class homeodomain protein with Concise description: The unc-4 gene encodes a paired-class homeodomain protein with homologs in Drosophila and vertebrates; UNC-4 is required for establishing the identity of the A class motor neurons DA and VA, and is thus required for movement, axon guidance, and synapse formation; UNC-4 is negatively regulated by VAB-7, and UNC-4 a…
F26C11.2	WBGene00006744	unc-4	36d73e59-b8e4-4072-9e64-8e2de9160ebc	1.32672	0	1.32672	0	13.2672	2.65344	2.65344	7.96033	0	0.5	0	0.5	The unc-4 gene encodes a paired-class homeodomain protein with Concise description: The unc-4 gene encodes a paired-class homeodomain protein with homologs in Drosophila and vertebrates; UNC-4 is required for establishing the identity of the A class motor neurons DA and VA, and is thus required for movement, axon guidance, and synapse formation; UNC-4 is negatively regulated by VAB-7, and UNC-4 a…
F26D10.12	WBGene00009156	clec-196	F26D10.12a.1	98.1774	98.1774	0	0	459.314	457.338	1.97682	0	0.214671	0		-0.214671	none available
F26D10.12	WBGene00009156	clec-196	6be3877f-426f-429e-8ae5-b79557731f25	63.5794	62.7085	0.870951	0	459.314	457.338	1.97682	0	0.137116	0.440581		0.303465	none available
F26D11.1	WBGene00017818	F26D11.1	e6be3a3f-d172-499f-b4d2-bffb4152db91	10.6138	5.30688	3.98016	1.32672	21.2275	7.62865	8.12617	5.47272	0.695652	0.489796	0.242424	-0.205856	none available
F26D12.1	WBGene00001439	fkh-7	ae41cdfc-40d0-4169-8ad8-d8aba51faf7f	7.29697	1.21616	6.0808	0	10.6138	1.21616	9.39761	0	1	0.647059		-0.352941	fkh-7 encodes one of 15 forkhead transcriptional regulators Concise description: fkh-7 encodes one of 15 forkhead transcriptional regulators encoded by the C. elegans genome; by homology, FKH-7 is predicted to function as a transcription factor that regulates gene expression during development; however, as loss of fkh-7 activity via RNA-mediated interference (RNAi) does not result in any obvious …
F26D12.1	WBGene00001439	fkh-7	42d9137d-0976-4451-87b8-561f824becc7	3.3168	0	3.3168	0	10.6138	1.21616	9.39761	0	0	0.352941		0.352941	fkh-7 encodes one of 15 forkhead transcriptional regulators Concise description: fkh-7 encodes one of 15 forkhead transcriptional regulators encoded by the C. elegans genome; by homology, FKH-7 is predicted to function as a transcription factor that regulates gene expression during development; however, as loss of fkh-7 activity via RNA-mediated interference (RNAi) does not result in any obvious …
F26E4.3	WBGene00009158	F26E4.3	fbe75f06-9c93-4b2f-9a32-4d3541992fc3	11.1002	5.55012	4.6251	0.925019	112.331	71.7669	16.5532	24.0107	0.0773353	0.279408	0.0385253	0.202072	none available
F26F12.4	WBGene00017835	F26F12.4	4b618da4-e289-4468-bd92-a820cf28f2df	46.5826	45.7037	0.878918	0	80.2666	77.6843	2.58236	0	0.588327	0.340354		-0.247973	none available
F26F12.4	WBGene00017835	F26F12.4	f56d55a9-00d9-4eae-a064-0e2af7924c16	1.47413	0.737067	0.737067	0	80.2666	77.6843	2.58236	0	0.00948799	0.285424		0.275936	none available
F26G1.4	WBGene00017840	ttm-2	e83838c1-7070-4af6-95f5-dc40a6ba5ab3	8.62369	2.46391	4.92782	1.23196	24.5443	4.45399	17.5317	2.55868	0.553191	0.281081	0.481481	-0.27211	none available
F26G1.4	WBGene00017840	ttm-2	394c0e0c-5ff2-4d84-969c-a012e317f64c	10.6138	0	9.28705	1.32672	24.5443	4.45399	17.5317	2.55868	0	0.52973	0.518519	0.52973	none available
F26G1.6	WBGene00017842	nep-12	8e0543b8-0674-492c-b06d-4a2ea3a37b3c	2.03431	2.03431	0	0	6.36826	5.69016	0.678102	0	0.357513	0		-0.357513	F26G1.6 encodes a neprilysin; neprilysins are thermolysin-like Concise description: F26G1.6 encodes a neprilysin; neprilysins are thermolysin-like zinc metallopeptidases, found on the outer surface of animal cells, that negatively regulate small signalling peptides (e.g., enkephalin, tachykinin, insulin, and natriuretic peptides) by cleaving them; while F26G1.6 has no clear orthologs in other org…
F26G1.6	WBGene00017842	nep-12	9e48e252-7373-4871-8f7f-073a3085fb9f	2.03431	1.3562	0.678102	0	6.36826	5.69016	0.678102	0	0.238342	1		0.761658	F26G1.6 encodes a neprilysin; neprilysins are thermolysin-like Concise description: F26G1.6 encodes a neprilysin; neprilysins are thermolysin-like zinc metallopeptidases, found on the outer surface of animal cells, that negatively regulate small signalling peptides (e.g., enkephalin, tachykinin, insulin, and natriuretic peptides) by cleaving them; while F26G1.6 has no clear orthologs in other org…
F26G1.6	WBGene00017842	nep-12	247434f9-2232-479c-b861-e55de48fb915	1.32672	1.32672	0	0	6.36826	5.69016	0.678102	0	0.233161	0		-0.233161	F26G1.6 encodes a neprilysin; neprilysins are thermolysin-like Concise description: F26G1.6 encodes a neprilysin; neprilysins are thermolysin-like zinc metallopeptidases, found on the outer surface of animal cells, that negatively regulate small signalling peptides (e.g., enkephalin, tachykinin, insulin, and natriuretic peptides) by cleaving them; while F26G1.6 has no clear orthologs in other org…
F26G1.9	WBGene00044662	F26G1.9	9ca4111c-0492-48b2-bb35-8eae9dc1d425	10.5474	7.30207	3.24536	0	24.6107	14.0683	10.5423	0	0.519042	0.307841		-0.211201	none available
F26G5.1	WBGene00017843	F26G5.1	7258233e-08de-4c9d-a786-8698933782d3	55.6007	31.5571	3.7568	20.2867	82.3783	43.8772	4.05255	34.4485	0.719214	0.927022	0.5889	0.207807	none available
F26H11.2	WBGene00009180	nurf-1	16fa628a-d0f8-4c8b-abc2-4222777d136b	3.98016	1.32672	2.65344	0	88.9284	58.9939	10.7194	19.2151	0.0224891	0.247537	0	0.225048	nurf-1 encodes the C. elegans ortholog of Drosophila NURF301, Concise description: nurf-1 encodes the C. elegans ortholog of Drosophila NURF301, a component of the NURF chromatin remodeling complex; in C. elegans, nurf-1 acts
F26H11.5	WBGene00001371	exl-1	F26H11.5.1	94.1051	5.05941	18.2139	70.8318	193.351	25.687	42.69	124.974	0.196964	0.426654	0.566772	0.22969	exl-1 encodes a putative chloride intracellular channel (CLIC) Concise description: exl-1 encodes a putative chloride intracellular channel (CLIC) paralogous to EXC-4; transgenic EXL-1 can partially rescue the exc-4(rh133) mutant phenotype when its expression is driven with an exc-4 promoter; EXL-1 is localized to lysosomes in intestinal cells and coelomocytes, endoplasmic reticulum in coelomocyt…
F27B10.1	WBGene00017850	F27B10.1	3c9f6a0c-bcbe-4361-a24b-d763d3383694	3.81332	0.423702	2.54221	0.847404	65.0093	1.71422	55.3846	7.91056	0.247169	0.0459011	0.107123	-0.201268	none available
F27B10.1	WBGene00017850	F27B10.1	350abbf0-82f8-40a0-bed7-82d0399302d3	12.5807	0.898624	10.3342	1.34794	65.0093	1.71422	55.3846	7.91056	0.524217	0.186589	0.170397	-0.337628	none available
F27B3.6	WBGene00017848	F27B3.6	793cd557-3c92-4c38-a093-8bd4dbe45d68	2.32176	0.773921	1.54784	0	11.9405	9.66295	2.27754	0	0.0800915	0.679612		0.59952	none available
F27B3.6	WBGene00017848	F27B3.6	002b8270-5bcb-45c3-b960-78d9a1e01a2a	4.64352	4.64352	0	0	11.9405	9.66295	2.27754	0	0.480549	0		-0.480549	none available
F27C1.1	WBGene00017851	F27C1.1	da3ca400-90c9-42f6-bb0d-bd69cdeb2e2f	0.663361	0	0.663361	0	3.3168	0.995041	2.32176	0	0	0.285714		0.285714	none available
F27C1.1	WBGene00017851	F27C1.1	c07eac46-a37a-4b5a-875a-0f1324cd477e	0.663361	0	0.663361	0	3.3168	0.995041	2.32176	0	0	0.285714		0.285714	none available
F27C1.1	WBGene00017851	F27C1.1	F27C1.1.1	1.99008	0.995041	0.995041	0	3.3168	0.995041	2.32176	0	1	0.428571		-0.571429	none available
F27C1.4	WBGene00017854	F27C1.4	c47ebe19-8d47-42c8-87b3-92847f716b5f	3.98016	2.65344	1.32672	0	13.2672	10.6138	2.65344	0	0.25	0.5		0.25	none available
F27C1.4	WBGene00017854	F27C1.4	635d22fe-0810-4fc2-bcdb-6308d2fda307	9.28705	7.96033	1.32672	0	13.2672	10.6138	2.65344	0	0.75	0.5		-0.25	none available
F27C8.2	WBGene00009183	F27C8.2	0e3caba2-4a9b-4368-9082-eb294dd04d74	3.80327	1.26776	1.90163	0.633878	13.0461	8.94063	2.94827	1.1572	0.141797	0.645	0.547771	0.503203	none available
F27C8.2	WBGene00009183	F27C8.2	f186cd99-0947-40d4-a96f-a6f96aa0eeb8	3.13991	3.13991	0	0	13.0461	8.94063	2.94827	1.1572	0.351195	0	0	-0.351195	none available
F27C8.2	WBGene00009183	F27C8.2	b29f11fb-0c81-45cc-8c77-a130e7f05b37	1.81319	1.81319	0	0	13.0461	8.94063	2.94827	1.1572	0.202803	0	0	-0.202803	none available
F27C8.4	WBGene00005003	spp-18	ae8a56b5-880e-426b-87c7-88a83dffc5cc	244.913	14.3364	121.859	108.717	365.379	17.1308	192.655	155.593	0.836878	0.632523	0.69873	-0.204354	none available
F27D4.3	WBGene00014746	F27D4.3	b951abd6-dd79-473f-85b5-15a2fb5c54df	32.5047	10.0877	0	22.417	40.465	11.9672	0.5528	27.945	0.842944	0	0.802183	-0.842944	none available
F27D4.3	WBGene00014746	F27D4.3	e1c58c8a-b4ab-4163-8cb0-69123cf5671a	2.764	0.5528	0.5528	1.6584	40.465	11.9672	0.5528	27.945	0.0461931	1	0.0593452	0.953807	none available
F27D9.7	WBGene00017865	F27D9.7	4e141297-364d-480d-988a-f54c3ce5c717	5.63856	1.12771	2.25543	2.25543	7.96033	2.62027	3.08463	2.25543	0.43038	0.731183	1	0.300803	none available
F27E5.9	WBGene00206354	F27E5.9	F27E5.9.1	3.3168	0	1.32672	1.99008	6.85473	1.03189	2.35862	3.46422	0	0.5625	0.574468	0.5625	none available
F27E5.9	WBGene00206354	F27E5.9	b27f778d-25c9-47a7-9207-54459468df7f	3.09568	1.03189	1.03189	1.03189	6.85473	1.03189	2.35862	3.46422	1	0.4375	0.297872	-0.5625	none available
F28A12.4	WBGene00017881	asp-13	267704c7-abe8-467b-b4e3-1d92552dd3cd	591.884	10.8713	144.951	436.062	1212.79	43.293	307.691	861.809	0.251111	0.471094	0.505984	0.219984	none available
F28B4.4	WBGene00017893	F28B4.4	a2a93337-9a5e-445e-a8e7-3a1175892414	0.44224	0	0.44224	0	11.056	8.91851	2.13749	0	0	0.206897		0.206897	none available
F28C10.3	WBGene00017898	F28C10.3	de14eaf9-1398-49ef-888a-9a37c25d4486	30.0723	20.8193	4.62651	4.62651	37.1482	23.7886	7.59584	5.7637	0.875179	0.609085	0.802698	-0.266094	none available
F28C6.2	WBGene00009203	aptf-3	F28C6.2.1	15.8891	2.44447	1.83335	11.6112	49.076	12.2597	3.16092	33.6554	0.199391	0.580007	0.345003	0.380616	aptf-3 encodes one of four C. elegans AP-2-like transcription Concise description: aptf-3 encodes one of four C. elegans AP-2-like transcription factors; APTF-3 is ~60% identical to that of APTF-4, which lies adjacent to aptf-3 on chromosome II; loss of aptf-3 activity via large-scale RNAi results in some embryonic lethality and low levels of larval arrest, body morphology defects, and uncoordina…
F28C6.2	WBGene00009203	aptf-3	0a26d881-ab27-4dee-9116-17b27a18b044	4.43504	2.53431	0	1.90073	49.076	12.2597	3.16092	33.6554	0.206719	0	0.0564762	-0.206719	aptf-3 encodes one of four C. elegans AP-2-like transcription Concise description: aptf-3 encodes one of four C. elegans AP-2-like transcription factors; APTF-3 is ~60% identical to that of APTF-4, which lies adjacent to aptf-3 on chromosome II; loss of aptf-3 activity via large-scale RNAi results in some embryonic lethality and low levels of larval arrest, body morphology defects, and uncoordina…
F28C6.2	WBGene00009203	aptf-3	247b344f-d23e-4a22-851d-d8b7e7a98ce3	5.76176	3.6011	0	2.16066	49.076	12.2597	3.16092	33.6554	0.293735	0	0.0641994	-0.293735	aptf-3 encodes one of four C. elegans AP-2-like transcription Concise description: aptf-3 encodes one of four C. elegans AP-2-like transcription factors; APTF-3 is ~60% identical to that of APTF-4, which lies adjacent to aptf-3 on chromosome II; loss of aptf-3 activity via large-scale RNAi results in some embryonic lethality and low levels of larval arrest, body morphology defects, and uncoordina…
F28C6.3	WBGene00000773	cpf-1	26d0fa34-8fb5-4825-bf60-aefa2b5c5b4c	18.255	8.69288	6.08502	3.47715	30.5146	16.8731	6.08502	7.55651	0.515193	1	0.460153	0.484807	none available
F28D1.9	WBGene00009218	acs-20	F28D1.9.1	21.0064	16.9407	4.06576	0	115.325	102.932	10.9649	1.4283	0.164581	0.370799	0	0.206218	acs-20 encodes a protein homologous to the mammalian FATP1 Concise description: acs-20 encodes a protein homologous to the mammalian FATP1 and FATP4 fatty acid transport proteins (FATP)/very long chain fatty acid acyl-CoA synthetases; acs-20 activity is required for proper cuticle development, specifically formation of a cuticle surface barrier that prevents penetration of small molecules; acs-20…
F28F8.1	WBGene00000057	acr-18	a624289c-d7b1-4a3e-8d34-a0a09e05ecc0	7.29697	1.21616	0	6.0808	13.2672	1.21616	1.19405	10.857	1	0	0.560081	-1	acr-18 encodes an alpha subunit of nicotinic acetylcholine Concise description: acr-18 encodes an alpha subunit of nicotinic acetylcholine receptor (nAChR), predicted to be a ligand-gated ion channel regulating fast action of acetylcholine at neuromuscular junctions and in the nervous system; ACR-18 falls into the 'DEG-3' class of nAChR subunits, apparently unique to nematodes, which
F28F8.1	WBGene00000057	acr-18	fbf36258-2ca4-41b6-9d97-23d42d09925b	5.97024	0	1.19405	4.7762	13.2672	1.21616	1.19405	10.857	0	1	0.439919	1	acr-18 encodes an alpha subunit of nicotinic acetylcholine Concise description: acr-18 encodes an alpha subunit of nicotinic acetylcholine receptor (nAChR), predicted to be a ligand-gated ion channel regulating fast action of acetylcholine at neuromuscular junctions and in the nervous system; ACR-18 falls into the 'DEG-3' class of nAChR subunits, apparently unique to nematodes, which
F28F9.2	WBGene00017906	F28F9.2	72951fa3-d12b-4e83-9ad9-63ef280d8df8	1.99008	0.995041	0.995041	0	2.65344	1.6584	0.995041	0	0.6	1		0.4	none available
F28F9.2	WBGene00017906	F28F9.2	5ee939ae-e8d9-40fa-a94f-e49269e71ffd	0.663361	0.663361	0	0	2.65344	1.6584	0.995041	0	0.4	0		-0.4	none available
F28H6.6	WBGene00009234	F28H6.6	740757ff-2fe1-4439-a3a2-845917140916	12.6038	5.04154	3.78115	3.78115	26.5344	15.1341	5.10788	6.29245	0.333125	0.74026	0.600904	0.407135	none available
F28H6.6	WBGene00009234	F28H6.6	e97e5392-0912-4b27-94ca-ce4e0fbb73fa	1.32672	0	1.32672	0	26.5344	15.1341	5.10788	6.29245	0	0.25974	0	0.25974	none available
F28H6.6	WBGene00009234	F28H6.6	0558222a-bb9d-495c-b1f1-fbb2060cb542	10.6138	9.09752	0	1.51625	26.5344	15.1341	5.10788	6.29245	0.601127	0	0.240964	-0.601127	none available
F28H7.3	WBGene00009237	F28H7.3	5e454a02-131d-4b6b-bdda-7fa7f066aaf3	80.7531	0	7.53695	73.2161	277.462	1.25078	15.1176	261.093	0	0.498556	0.280421	0.498556	none available
F28H7.3	WBGene00009237	F28H7.3	F28H7.3.1	181.363	1.25078	6.25389	173.858	277.462	1.25078	15.1176	261.093	1	0.413684	0.665885	-0.586316	none available
F29F11.2	WBGene00009255	ugt-34	46d96059-0450-49aa-8cfe-b1f5ef4cec50	11.9405	7.67603	4.26446	0	27.8611	12.5407	15.3205	0	0.612091	0.278351		-0.33374	ugt-34 encodes a putative UDP-glucuronosyltransferase (UGT), Concise description: ugt-34 encodes a putative UDP-glucuronosyltransferase (UGT), belonging to a large nematode-specific expanded family of UGTs, that inhibits CEP-1-
F29F11.2	WBGene00009255	ugt-34	F29F11.2.1	9.28705	1.32672	7.96033	0	27.8611	12.5407	15.3205	0	0.105793	0.519588		0.413794	ugt-34 encodes a putative UDP-glucuronosyltransferase (UGT), Concise description: ugt-34 encodes a putative UDP-glucuronosyltransferase (UGT), belonging to a large nematode-specific expanded family of UGTs, that inhibits CEP-1-
F29G9.4	WBGene00001345	fos-1	dce8810b-969c-4283-8656-1fbe4bdd3a8a	1.99008	1.32672	0	0.663361	7.29697	1.99008	1.32672	3.98016	0.666667	0	0.166667	-0.666667	fos-1 encodes two basic region-leucine zipper (bZip) transcription Concise description: fos-1 encodes two basic region-leucine zipper (bZip) transcription factors, FOS-1A and FOS-1B, that are the sole C. elegans orthologs of the fos bZip transcription factor family; during hermaphrodite development, FOS-1A activity is required cell autonomously in the gonadal anchor cell for basement-membrane rem…
F29G9.4	WBGene00001345	fos-1	5c8c8d4e-5a50-4958-8984-48091788dbbc	3.98016	0	1.32672	2.65344	7.29697	1.99008	1.32672	3.98016	0	1	0.666667	1	fos-1 encodes two basic region-leucine zipper (bZip) transcription Concise description: fos-1 encodes two basic region-leucine zipper (bZip) transcription factors, FOS-1A and FOS-1B, that are the sole C. elegans orthologs of the fos bZip transcription factor family; during hermaphrodite development, FOS-1A activity is required cell autonomously in the gonadal anchor cell for basement-membrane rem…
F30A10.1	WBGene00009260	calm-1	a5d42501-7f28-4f09-8dd7-a147a1ec2b24	68.9674	45.6909	6.03465	17.2418	86.2369	54.7041	10.0091	21.5237	0.835238	0.602915	0.801064	-0.232323	none available
F30A10.2	WBGene00009261	F30A10.2	5f44d2bb-3a10-4ae9-90c7-120562fa3693	96.4726	89.1145	6.54052	0.817565	169.82	160.243	7.59713	1.98017	0.556121	0.860919	0.412876	0.304798	none available
F30B5.1	WBGene00001074	dpy-13	9cc6b494-ce23-4090-8ab8-824bb1bf7851	11.0536	0.409391	8.18783	2.45635	197.46	0.903517	132.301	64.2557	0.453109	0.0618878	0.0382277	-0.391221	dpy-13 encodes a member of the collagen superfamily containing Concise description: dpy-13 encodes a member of the collagen superfamily containing 20 copies of the collagen triple helix repeat; transcipt levels oscillate, peaking
F30F8.10	WBGene00009277	F30F8.10	946b5def-e4ff-4224-be54-d32b9e5c0164	38.3643	14.0669	7.67287	16.6246	59.7024	23.32	8.73595	27.6465	0.603214	0.87831	0.601325	0.275096	none available
F31A3.3	WBGene00017938	F31A3.3	cca96eb8-e6eb-43af-9bd9-ace13d509edb	4.20128	0	3.36103	0.840257	16.1418	2.43232	12.3164	1.39306	0	0.27289	0.603175	0.27289	none available
F31A3.3	WBGene00017938	F31A3.3	4a44bd32-3249-4128-ab10-d7188e963802	9.72929	2.43232	7.29697	0	16.1418	2.43232	12.3164	1.39306	1	0.59246	0	-0.40754	none available
F31B12.1	WBGene00004036	plc-1	F31B12.1c.1	1.32672	0	1.32672	0	2.65344	1.32672	1.32672	0	0	1		1	plc-1 encodes a predicted phospholipase C that affects fertility Concise description: plc-1 encodes a predicted phospholipase C that affects fertility and possesses two functional domains not commonly seen in other phospholipases: a C-terminal Ras-associating domain with structural similarity to RalGDS and AF-6, and an N-terminal CDC25-like domain that possesses structural homology to guanine
F31B12.1	WBGene00004036	plc-1	55460582-dd0c-4370-835a-c0d568bd78e6	1.32672	1.32672	0	0	2.65344	1.32672	1.32672	0	1	0		-1	plc-1 encodes a predicted phospholipase C that affects fertility Concise description: plc-1 encodes a predicted phospholipase C that affects fertility and possesses two functional domains not commonly seen in other phospholipases: a C-terminal Ras-associating domain with structural similarity to RalGDS and AF-6, and an N-terminal CDC25-like domain that possesses structural homology to guanine
F31D4.4	WBGene00009291	clec-264	283627e9-4866-42a8-ad08-6c22b129eb28	52.4718	9.12553	42.2056	1.14069	70.3604	15.4679	53.0221	1.87039	0.589964	0.796	0.609869	0.206035	none available
F31D4.5	WBGene00009292	F31D4.5	F31D4.5b.1	5.30688	3.98016	1.32672	0	93.8195	92.4927	1.32672	0	0.0430322	1		0.956968	none available
F31D4.5	WBGene00009292	F31D4.5	68aa9f34-3557-44ac-9c30-09c51f9919bd	24.5588	24.5588	0	0	93.8195	92.4927	1.32672	0	0.265521	0		-0.265521	none available
F31D4.5	WBGene00009292	F31D4.5	a93d2e98-39af-46f4-a69c-5b5f01ce6b76	23.4532	23.4532	0	0	93.8195	92.4927	1.32672	0	0.253568	0		-0.253568	none available
F31D5.2	WBGene00017945	F31D5.2	430e6c47-a618-4392-acb3-8ef62374ea51	3.53792	2.65344	0	0.884481	33.6103	8.37082	9.88634	15.3531	0.316987	0	0.0576092	-0.316987	none available
F31D5.2	WBGene00017945	F31D5.2	81a0a615-39a7-4ba9-a747-3ad0556761af	21.4487	3.29979	7.42453	10.7243	33.6103	8.37082	9.88634	15.3531	0.394202	0.750989	0.698512	0.356787	none available
F31D5.3	WBGene00006495	cpna-1	efde0328-1e0d-4b02-8215-4617134c2352	9.59662	0.685473	4.79831	4.11284	26.5344	5.40713	11.9044	9.22292	0.126772	0.403071	0.445936	0.276299	none available
F31D5.3	WBGene00006495	cpna-1	26c66128-926b-47d7-bc91-9f5e35647bfb	7.60653	2.28196	2.28196	3.04261	26.5344	5.40713	11.9044	9.22292	0.422028	0.191691	0.329897	-0.230337	none available
F31D5.4	WBGene00017947	mth-2	15b2aa84-e17d-4faf-b6af-c1da352b5fb0	1.32672	1.32672	0	0	2.65344	1.32672	1.32672	0	1	0		-1	none available
F31D5.4	WBGene00017947	mth-2	eb9b68ca-6b20-452e-b636-b323b60dfc3d	1.32672	0	1.32672	0	2.65344	1.32672	1.32672	0	0	1		1	none available
F31E3.2	WBGene00017950	F31E3.2	c0f423a6-fd81-4085-95cd-dc93c83f3c06	2.65344	0	2.65344	0	34.4947	20.3632	12.8049	1.32672	0	0.207221	0	0.207221	none available
F31E3.2	WBGene00017950	F31E3.2	cf8008a4-3747-420d-86a7-635ccc27180b	7.73921	6.33208	1.40713	0	34.4947	20.3632	12.8049	1.32672	0.310958	0.10989	0	-0.201067	none available
F31E9.6	WBGene00009299	F31E9.6	97957339-03c7-4721-bef9-320afec6a2ad	2.91879	1.16751	1.16751	0.583757	17.6454	11.3652	3.26615	3.01407	0.102727	0.357459	0.193677	0.254732	none available
F31F4.15	WBGene00017962	fbxa-72	2415157c-a9b8-422b-9032-bb5047d0381d	37.5557	1.70708	1.70708	34.1415	159.207	6.40956	3.15221	149.645	0.266333	0.541549	0.228151	0.275216	none available
F31F6.5	WBGene00000902	daf-6	F31F6.5.1	1.32672	0	1.32672	0	24.1463	17.7327	4.69415	1.7195	0	0.282633	0	0.282633	daf-6 encodes a Patched-related protein; daf-6 is required Concise description: daf-6 encodes a Patched-related protein; daf-6 is required for amphid channel morphogenesis and thus, also for normal morphology of the outer labial sensilla; specifically, daf-6 is required for restricting the amphid sensory compartment diameter; daf-6 mutants display defects in several neuron-mediated functions incl…
F32A5.2	WBGene00017968	skpo-3	F32A5.2a.1	4.64352	0.773921	0	3.8696	150.45	1.022	51.8798	97.5481	0.75726	0	0.0396687	-0.75726	none available
F32A5.2	WBGene00017968	skpo-3	58f51602-e08a-4fd8-b635-6e756f819802	31.1119	0	10.9223	20.1897	150.45	1.022	51.8798	97.5481	0	0.210531	0.206971	0.210531	none available
F32A6.3	WBGene00017974	vps-41	d139c3ea-4902-4824-8724-f513f82bf763	16.584	10.2055	2.55139	3.82708	17.2474	10.2055	3.21475	3.82708	1	0.793651	1	-0.206349	vps-41 encodes the C. elegans homolog of the Saccharomyces Concise description: vps-41 encodes the C. elegans homolog of the Saccharomyces cerevisiae vacuolar sorting protein Vps41p; in C. elegans, vps-41 activity is required for biogenesis of the lysosome-related gut granules and for embryonic development;
F32A6.3	WBGene00017974	vps-41	9c7bccc6-5428-4405-b75a-0697138528bd	0.663361	0	0.663361	0	17.2474	10.2055	3.21475	3.82708	0	0.206349	0	0.206349	vps-41 encodes the C. elegans homolog of the Saccharomyces Concise description: vps-41 encodes the C. elegans homolog of the Saccharomyces cerevisiae vacuolar sorting protein Vps41p; in C. elegans, vps-41 activity is required for biogenesis of the lysosome-related gut granules and for embryonic development;
F32A6.5	WBGene00006064	sto-2	2d5eb882-47d4-4dc3-89e3-238c48b1871c	2.65344	2.65344	0	0	7.96033	6.63361	1.32672	0	0.4	0		-0.4	none available
F32A6.5	WBGene00006064	sto-2	050b8b34-403d-44c1-94c7-93f99284a2e7	2.65344	1.32672	1.32672	0	7.96033	6.63361	1.32672	0	0.2	1		0.8	none available
F32A6.5	WBGene00006064	sto-2	08ad3ff2-4e19-4582-9461-6b78c241b17d	2.65344	2.65344	0	0	7.96033	6.63361	1.32672	0	0.4	0		-0.4	none available
F32A7.4	WBGene00009305	F32A7.4	90140705-d8e6-4fca-8563-11b32354f9e5	56.2764	27.2003	13.1312	15.945	104.811	46.5575	16.6439	41.6096	0.58423	0.788947	0.383204	0.204718	none available
F32D8.1	WBGene00009326	F32D8.1	F32D8.1.1	1.99008	1.99008	0	0	9.28705	8.18145	1.1056	0	0.243243	0		-0.243243	none available
[truncated: 2,823 more rows]

## Sheet: YA_versus_L1
Table S8 Deferentially expressed isoforms by ratio between YA and L1 stages
[truncated: 5,354 more rows]

[truncated: 1 more sheets: YA_versus_EMB]
