# Supplementary material for: Direct full-length RNA sequencing reveals unexpected transcriptome complexity during Caenorhabditis elegans development
Source: HighWire-hosted journal article supplement (doi:10.1101/gr.251512.119), 2020-02-01
Supplement: Supplemental_Table_S9.xlsx [file Supplemental_Table_S9.xlsx]

## Sheet: EMB_5mC
Table S9 List of putative RNA modification sites identified with long reads.
Isoform name	5mC site	5mC fraction
AC3.2	128	0.9333
AC7.2a.1	1751	0.9
AH6.5	101|291|858|1099|1609|1790	0.9178|0.9286|0.9518|0.9055|0.9767|0.9806
AH9.3	809|940	0.92|0.9355
B0001.1a	629|739|832	0.9231|0.9231|0.907
B0001.4a	409|717|946|962	0.9423|0.9412|0.9487|0.9474
B0001.5	1765	0.9
B0001.6.1	902|1355|1695|1697	0.9649|0.9038|0.9286|0.963
B0001.6.2	1554	0.9394
B0001.8a	36|846	0.9333|0.9545
B0019.2	938|1992	0.9048|0.9091
B0024.10	133|137	0.9048|0.9
B0024.11	236|1160|1548	0.913|0.9286|0.9231
B0024.13	335	0.9412
B0024.9a.1	402	0.9
B0024.9b.1	402	0.9394
B0025.1c.1	1222	0.9
B0025.2.1	163|319|379|879|896|919|969|1479	0.9508|0.9355|0.9306|0.9494|0.9189|0.92|0.9273|0.9694
B0025.2.2	1472	0.9444
B0034.3a	983|1000|1154|1286|1885|1895|2375|2579|3138	0.9048|0.9459|0.931|0.9167|0.9216|0.9048|0.9231|0.9167|0.9184
B0035.11	493	0.901
B0035.14a.1	1349|1350|1393|1514|1543	0.9167|0.92|0.92|0.9259|0.931
B0035.14a.2	1321	0.9
B0035.1b	231|633	0.9604|0.9371
B0035.2	161|230|752	0.9355|0.9259|0.9231
B0035.3	160	0.9318
B0035.4a.1	92|120|122|124|137|264|267|501	0.9429|0.9155|0.9692|0.9205|0.9333|0.9913|0.9821|0.9355
B0035.4a.2	199	0.931
B0035.5	629|1638	0.92|0.95
B0035.6	758|872|1915|2087|2144	0.9302|0.9091|0.9167|0.9|0.9302
B0041.2d	1646|1707|1827|2111|2114|2623|2737|2739	0.9412|0.951|0.9231|0.9048|0.9565|0.9231|0.9531|0.92
B0041.2e	2677	0.9259
B0041.4	104|194|331|333|446|522|963	0.9559|0.9835|0.9669|0.9958|0.9892|0.9768|0.9304
B0041.5a	850|958|1093|1437	0.9048|0.9459|0.9|0.9394
B0041.7.2	2647|4069	0.9259|0.9
B0041.8.1	63|584|586	0.9429|0.9268|0.9474
B0205.11	39|169|216|380|571|573|876	0.9596|0.907|0.9512|0.9737|0.9608|0.9048|0.9286
B0205.1a	193	0.9
B0205.3.1	48|824	0.9565|0.9231
B0205.6	588|807|837|849|1274|1331	0.9394|0.9048|0.9091|0.9524|0.9167|0.9
B0205.7	331|492|1218|1255|1330|1444	0.9808|0.9803|0.9771|0.9197|0.9218|0.9151
B0205.9	1493|1588	0.9118|0.9189
B0207.4	396|954|1097|1100	0.9231|0.9574|0.9048|0.9032
B0207.6	522	0.9032
B0222.6	323	0.9375
B0222.8	321	0.9
B0228.6	859	0.9091
B0228.7.2	482|754	0.907|0.907
B0238.11	417|643|758|760|913|916|917|919|921	0.9186|0.9821|0.9362|0.9474|0.9172|0.9098|0.936|0.9457|0.9706
B0238.9	780	0.9
B0240.4	244|264|657|772|935|1164|1465|1482|1609|1688	0.9333|0.9583|0.9286|0.907|0.9672|0.9508|0.9048|0.976|0.9677|0.9333
B0244.2	424|713|2198|2391|2436|2476	0.9286|0.9149|0.9|0.9348|0.9231|0.9062
B0250.1	395|402|515	0.9808|0.9674|0.9803
B0250.5	539	0.9123
B0252.2.1	351	0.92
B0252.4b	421|480	0.9398|0.913
B0261.1	1128|1894|2152|2302	0.9|0.931|0.9|0.9167
B0261.2b	6154|8236|8239|8274	0.9048|0.9062|0.9231|0.9
B0261.4a	228|322	0.9268|0.9048
B0261.4b	228	0.9
B0261.7	526|663|777|884|1008	0.9333|0.9032|0.9759|0.9038|0.9091
B0261.8	450|518|522	0.9118|0.9636|0.9403
B0272.1	323|763|1323	0.9024|0.9556|0.9189
B0272.2	514	0.9149
B0272.3	126|137|524|987	0.9605|0.9167|0.9189|0.9138
B0272.4	306|439|555	0.9444|0.931|0.9524
B0273.2.1	936|1664	0.9091|0.9091
B0280.10a	194|337	0.9091|0.9118
B0280.1a	565|635	0.9048|0.9512
B0280.3.1	177|409|573|651|701	0.9149|0.9|0.9167|0.9048|0.9211
B0280.5	1453|1530	0.931|0.9394
B0280.8	904	0.9412
B0280.9	78|525|1000	0.9118|0.9355|0.9608
B0281.5a	244|448|606	0.9138|0.9787|0.903
B0285.3	487|579|719	0.9318|0.92|0.925
B0285.4.1	662|705	0.9286|0.9189
B0285.4.2	662|705	0.9512|0.9512
B0285.5	578|635|1131|1350|1354|1697	0.9459|0.9167|0.9394|0.9048|0.9062|0.9545
B0285.7	360|462|972|1487|1488|1590|1664|2073|2382|2633|2635|2637|2642|2671	0.92|0.9322|0.9737|0.9381|0.9125|0.9753|0.9405|0.9286|0.9437|0.968|0.9688|0.9724|0.9291|0.9429
B0285.9.1	1193	0.9259
B0286.4a.1	340|489|880|1425|1747	0.9032|0.9538|0.9412|0.9359|0.9735
B0286.4a.2	1463	0.9091
B0286.4c.1	743|1288	0.9032|0.9423
B0302.1a	1516|2502|3620|3862	0.9|0.9091|0.9231|0.9355
B0303.15	217|296|355|538	0.9053|0.9062|0.9206|0.9322
B0303.3.1	187|286|295|680|697|706|810|1094|1303|1324	0.9|0.9487|0.931|0.9545|0.9487|0.9262|0.9273|0.929|0.972|0.9524
B0303.3.2	266|660|677|686|790|1283	0.9123|0.9333|0.9531|0.9143|0.9545|0.9583
B0303.4.1	154|554|557|1181|2038|2154	0.9333|0.925|0.9091|0.9286|0.913|0.9167
B0303.7b	1044	0.9048
B0303.9	1909|1911	0.9|0.9
B0304.2	688	0.931
B0310.2b	1096	0.9231
B0310.5a	1598	0.9032
B0331.1	1266	0.92
B0334.11a	1367	0.9167
B0334.15	134|393|510|588	0.9524|0.9394|0.9535|0.9512
B0334.3a.1	802|1362|1926	0.9412|0.9429|0.9
B0334.3a.2	1286	0.9091
B0334.3b	1237	0.9259
B0334.4	110|525|672	0.9205|0.963|0.9186
B0334.5	212|290|430|432|674	0.9333|0.9091|0.9423|0.9565|0.9355
B0334.6	873	0.9
B0336.10.1	301|405|426	0.925|0.9744|0.9786
B0336.10.2	403|424	0.9492|0.9286
B0336.10.3	194|403|424	0.9143|0.9467|0.9661
B0336.11b	599	0.9259
B0336.13	116|398	0.9674|0.9
B0336.1a.1	262|1044	0.9048|0.92
B0336.2.1	373|529|636|638|648|650|705|1001|1003	0.9091|0.973|0.9562|0.9514|0.9667|0.9549|0.9373|0.9857|0.9556
B0336.2.2	467|530	0.931|0.9048
B0336.2.3	411|518|520|530|883|886	0.9231|0.9273|0.9529|0.9213|0.9667|0.9508
B0336.3a	44|248|277|958|1012	0.9032|0.9091|0.9333|0.9231|0.9091
B0336.4a	1445|1849|1852	0.9524|0.9024|0.95
B0336.6.1	220|397|559|900|1336	0.9298|0.9|0.962|0.9038|0.9697
B0336.6.2	549	0.9091
B0336.8	245	0.9672
B0350.2h.1	3460|5686	0.9091|0.9143
B0353.1a	555|1139	0.9024|0.9615
B0353.1b	1224	0.9459
B0361.10.2	599|655	0.9344|0.9375
B0361.3.1	1157|1598|1954	0.9318|0.9048|0.9318
B0361.5a	903|1146|1395	0.913|0.9048|0.92
B0361.6	1135|1305	0.9265|0.9259
B0361.7.1	845	0.913
B0361.8	1381	0.9091
B0361.9a	213	0.913
B0365.3.2	668|670|796|1193|1345|1385|1440|1481|1717|1720|2065|2137|2164|2178|2485|2518|2576|2654|2753	0.931|0.9459|0.964|0.9603|0.9167|0.9|0.9714|0.9091|0.92|0.9487|0.9242|0.9219|0.9756|0.9655|0.9836|0.9091|0.9054|0.9152|0.982
B0365.9	133|589	0.9|0.9412
B0379.3b	189|2451|2774	0.92|0.9|0.9091
B0393.1.1	209|273|309|411|648|814	0.9576|0.9545|0.9615|0.902|0.9186|0.9076
B0393.1.2	177|277|616	0.9091|0.92|0.9125
B0393.2.1	1505	0.913
B0393.3	258|626|1165|1795|1850	0.9649|0.9434|0.9167|0.9455|0.9091
B0393.5	1023|1199|1799|3089|3196	0.9091|0.9231|0.9355|0.9|0.931
B0393.6	384|427|1118|1218	0.9259|0.9286|0.9375|0.9091
B0395.3.1	352|463|1151|1570|1760	0.9048|0.9286|0.9167|0.9459|0.9375
B0403.4	326|479|481|530|532|645|953|1032|1467	0.9592|0.9949|0.9672|0.9375|0.9|0.9853|0.9241|0.9247|0.9373
B0410.2a	94	0.9231
B0412.3a.1	1301|2637|2648	0.9167|0.9|0.9048
B0412.4	141|172	0.9584|0.9375
B0414.3	239|569|570|647|659|662	0.9333|0.9136|0.9828|0.9412|0.9381|0.9573
B0414.5	1819|2011	0.9091|0.9
B0414.7a	1851|2829|3137|3138|4117|4142|4143	0.9091|0.9091|0.9394|0.9348|0.9|0.9429|0.931
B0414.8a	1557|1777|1981	0.9048|0.9231|0.9375
B0416.4	78	0.9091
B0416.5a	242|867|1283|1296|1299|1429|1453|1641|1847|1899|1929	0.9583|0.9778|0.932|0.9542|0.9709|0.9494|0.9268|0.9489|0.9882|0.9262|0.9242
B0416.5b	1720	0.9259
B0432.10.1	188	0.931
B0432.2	535|572	0.9785|0.9464
B0432.3	467	0.9706
B0432.4.1	751	0.9623
B0454.9.1	975	0.9231
B0457.1a	261|1066|2343	0.9091|0.9167|0.9524
B0464.1.1	327|515|650|712|947|1118	0.9667|0.9444|0.9024|0.9091|0.9231|0.975
B0464.2a	2618|2726	0.9355|0.92
B0464.3	142|241	0.9615|0.9375
B0464.5c.1	2890|3016	0.9394|0.9286
B0464.5c.3	2965	0.9091
B0464.5d.1	36|974|976|1346|1707|1711|2464|2664|2712|2716|2790|2858	0.9655|0.9556|0.9286|0.9231|0.9464|0.9167|0.9464|0.9479|0.9429|0.9576|0.9367|0.9394
B0464.6.1	604|608|738|1436|1745|1911|2008|2012|2034	0.92|0.9062|0.9231|0.9038|0.9|0.9273|0.9683|0.9333|0.9048
B0464.6.2	1242|1814	0.9143|0.9038
B0464.8	713	0.9231
B0464.9	410|710	0.9333|0.9512
B0491.1	170|426	0.9032|0.9
B0491.5.1	1127	0.9286
B0491.5.2	976	0.9048
B0491.5.3	1050|1124	0.913|0.9091
B0491.6a	476|698|1094	0.9|0.9167|0.9333
B0491.7	559	0.9048
B0495.10a.2	2033	0.9286
B0495.2a	586|799|1792|1991|2201	0.9189|0.9286|0.9|0.9|0.9375
B0495.4	1759|1927	0.9|0.9286
B0495.7.1	189|434|1606|1738|2041|2301	0.9024|0.963|0.9143|0.9022|0.9048|0.9254
B0495.7.3	2258	0.9375
B0495.8a	365|368|374|621	0.9355|0.9167|0.9286|0.9059
B0496.7	107	0.913
B0496.8	102|104|293|385|591|991	0.9032|0.9091|0.913|0.9048|0.9286|0.9091
B0507.1	938	0.931
B0507.2	84|524|527|1396	0.9167|0.913|0.9388|0.9355
B0511.1	327|441|846|1047|1050	0.9221|0.9318|0.9286|0.942|0.9091
B0511.6	218|245|370|384|984|1058|1305|1314	0.9829|0.9259|0.9528|0.9703|0.9257|0.9272|0.9688|0.9398
B0511.7	185|192|413|447|839	0.95|0.9333|0.9583|0.931|0.9552
B0511.8.1	743	0.931
B0511.9a	174|296|344|560|814	0.9474|0.95|0.96|0.9|0.9167
B0513.1a	2416|3389|3493	0.9286|0.9667|0.9344
B0513.2a.2	463|658|660	0.9483|0.913|0.9245
B0513.3a	191	0.9444
B0523.5	3135	0.925
B0546.1.1	212|326	0.9389|0.9547
B0546.1.2	319	0.9259
B0546.2a	151|790|931	0.9259|0.9655|0.9111
B0546.4a	352|436	0.9|0.9091
B0547.1	35|182|648|676|687|759|1137	0.9512|0.9394|0.9535|0.9697|0.9592|0.9159|0.9655
B0563.2.2	233|610	0.9231|0.96
B0563.4	229|295|439|919|974|1021	0.925|0.9062|0.9524|0.9167|0.9592|0.9487
B0564.11.2	1211	0.9167
B0564.1a	24|806|823	0.9231|0.9|0.9231
BE0003N10.2	1218	0.931
BE0003N10.3a	1305	0.9167
BE10.2	329|514|1593|1594	0.9333|0.9|0.9375|0.9211
C01A2.3	45|771|912	0.9375|0.9459|0.9
C01A2.4	167|203|204|317|412|566	0.9259|0.9455|0.9516|0.9444|0.9318|0.9302
C01A2.5	206|306|312|705|717|930|1080	0.9565|0.9634|0.9167|0.9531|0.971|0.9583|0.9515
C01B10.11	115|377|750|995|996|1034	0.9024|0.9362|0.9421|0.9388|0.9118|0.9331
C01B10.5a	326|412|487|624|755	0.9259|0.9857|0.9965|0.9131|0.9729
C01B10.5b	358	0.9
C01B10.5c	134|203|340	0.9735|0.9963|0.9003
C01B10.6a.1	412	0.9048
C01B10.9	777|1810	0.9259|0.9259
C01B12.2	991|994|1247	0.9362|0.9355|0.9062
C01B12.3	1503	0.9167
C01B7.1a.1	704|1006|1032|2104|3115	0.9286|0.9231|0.9091|0.92|0.9
C01C10.3	661	0.913
C01C10.4	428|784	0.9388|0.9
C01C7.1b	547|2653|2698|2886|2983	0.9062|0.9|0.9038|0.9429|0.9592
C01F1.1	391	0.9459
C01F1.3a	89	0.9077
C01F1.6	171	0.9487
C01F6.1	1025|1029|1867	0.9286|0.9464|0.9333
C01F6.5	53|293|441	0.9843|0.9032|0.9677
C01F6.6a	484|1667|1812	0.9375|0.9|0.9
C01F6.8a	151|236|572	0.92|0.9167|0.9231
C01F6.9a	97|170|220|289	0.9456|0.9625|0.9848|0.9703
C01G10.10a	1075	0.9259
C01G10.11a.1	247|507|654|762|803|1439|1442|1486	0.9048|0.9048|0.9167|0.9|0.9273|0.9167|0.9684|0.9552
C01G10.8.1	406	0.9091
C01G10.8.2	415|690|959|1166|1169	0.9459|0.971|0.96|0.9688|0.9648
C01G10.9.1	777	0.9167
C01G12.1	409	0.931
C01G5.6	299|358|432|971|1011|1012|1194	0.9625|0.9028|0.9375|0.9286|0.9054|0.9515|0.9535
C01G6.1a.1	86|101|240|450|912	0.9726|0.9312|0.9426|0.9559|0.9756
C01G6.1a.2	71|86|225|435|897	0.9318|0.9394|0.9243|0.9412|0.9294
C01G6.1a.3	71|86|225|435|451|897	0.9412|0.9787|0.9235|0.9286|0.9|0.9404
C01G6.1b.1	101|940	0.9412|0.9412
C01G6.3.1	428|482|484|831|1108	0.9118|0.9005|0.9194|0.9652|0.9763
C01G6.3.2	1102	0.942
C01G6.5	430|1006|1047|1809|2256|3135|3583	0.9|0.92|0.9412|0.9123|0.9|0.9608|0.9048
C01G6.6a.1	1139	0.913
C01G6.7	259|596	0.931|0.9024
C01G6.8a	784|1501|1649	0.9375|0.9038|0.9286
C01G6.8b	918|1600|1638	0.9429|0.9429|0.9091
C01G8.1a	175|1067	0.9|0.9333
C01G8.3	433|782	0.9091|0.9577
C01G8.5a	73|301|573|849|944|1467|1798|2028|2095|2225	0.92|0.9856|0.9465|0.9278|0.9|0.9038|0.903|0.9623|0.9468|0.9524
C01G8.5b	2061	0.9375
C01G8.9a	5651	0.92
C01G8.9c.1	5216	0.9
C01G8.9c.2	3609	0.9
C01H6.5c	609|2222|2286	0.9048|0.9333|0.9259
C01H6.7a.2	970|1503	0.9412|0.96
C01H6.8a	118	0.9
C01H6.9	1557|2858	0.9048|0.913
C02B10.1.1	135|1174	0.9048|0.913
C02B10.3	579|998|1140|1389	0.931|0.9655|0.9512|0.9655
C02B10.4	574	0.931
C02B10.5a.1	733|755|1745|2057|2298|2394|2396	0.9394|0.9487|0.9048|0.9412|0.92|0.9455|0.9512
C02B8.6	1620	0.931
C02D5.4	102|303|636	0.9459|0.9273|0.9552
C02E11.1a	34|37|1191|1727|2050|2365|2797|2838|2930|3326|3445|3449|3533	0.9524|0.9375|0.9429|0.9091|0.9189|0.9434|0.9245|0.9388|0.918|0.9512|0.9104|0.9649|0.9375
C02E11.1b	1194|1730|2053|2368|2933|3329|3452	0.9286|0.9167|0.92|0.9348|0.9434|0.9512|0.9683
C02E7.6	82	0.9693
C02F12.1a	224|593	0.9355|0.9048
C02F12.4	157|158|369|826|1381|1512|1574	0.9333|0.9118|0.9375|0.9412|0.9143|0.963|0.902
C02F12.7	2536|3300	0.92|0.9167
C02F4.2a	2568	0.913
C02F5.1	272|545|816|1020|1033|1145|1706|1988|2268|2513|2939|2949|3210	0.9231|0.9333|0.9333|0.94|0.9091|0.9259|0.9231|0.96|0.9318|0.9231|0.9231|0.9032|0.9091
C02F5.12	1182	0.9149
C02F5.13	111	0.931
C02F5.3	266|269|371|494	0.9821|0.95|0.9659|0.94
C02F5.4	54|417|517|519|991	0.9167|0.9333|0.9286|0.9545|0.9535
C02F5.6b	66	0.913
C02F5.9	26|680|725	0.9057|0.931|0.9362
C02H7.3a	4479|4480	0.9091|0.9
C03A3.1a	513	0.9
C03A7.11	270|1075	0.9394|0.9259
C03B1.12	60|74|869|1023	0.9239|0.9269|0.9076|0.952
C03B8.4	1798|2071|3827|5131|5790|6170|6268|6532|6588	0.9167|0.9444|0.9296|0.9286|0.9341|0.9109|0.9455|0.9178|0.9178
C03C10.1.1	251|1339|1490|1703	0.9333|0.9348|0.9474|0.9492
C03C10.1.2	252|1248|1340|1491|1704|1840|1843	0.9664|0.9474|0.9346|0.9495|0.96|0.9206|0.931
C03C10.3	645|689|729|850|1327	0.9559|0.9651|0.9385|0.9323|0.96
C03C10.4	235|236|242|466	0.9741|0.9016|0.9231|0.9062
C03C10.5	190|267|283	0.9062|0.9583|0.9176
C03D6.3a.2	164	0.9048
C03D6.4	529|1371|1384|2764|3184|4235	0.9|0.9062|0.9259|0.9375|0.9091|0.9091
C03D6.8	183|281	0.906|0.9266
C03D6.9	47	0.9205
C03E10.4	229|468|617|1487|1490	0.9273|0.9189|0.9259|0.9556|0.9
C03G5.1	71|468|1317|1377|2049|2121|2137	0.9333|0.9459|0.9434|0.9423|0.9149|0.9167|0.9375
C03G6.15	775	0.913
C03H12.1d	989	0.913
C03H5.2	146|542	0.9118|0.9512
C03H5.3a	273|569|733	0.9032|0.907|0.9231
C04A11.2	1438|1459	0.9|0.9
C04A2.3g	3092|3437|3999	0.9167|0.9259|0.9
C04A2.7a.1	388|408|1186|1195|1840|1973	0.9167|0.92|0.9286|0.9518|0.9143|0.9048
C04A2.7b.1	1195|2577	0.9444|0.9444
C04A2.7c.1	1192|1294	0.9091|0.931
C04C11.2.1	102|430|1269|2041|2044	0.9286|0.9516|0.94|0.9714|0.9
C04C3.3	176|747|909	0.9143|0.9388|0.9
C04E7.2	1167|1232	0.9062|0.931
C04F1.3	451|1169|1780	0.9375|0.9444|0.9259
C04F12.10	22|221|654|664|1296|1312	0.931|0.9455|0.9744|0.9048|0.9444|0.9643
C04F12.3	815|1159|1385	0.9231|0.913|0.9259
C04F12.4.1	170|256|257|338	0.9538|0.95|0.9498|0.9255
C04F12.4.2	245	0.9186
C04F5.8	71|865|999|1017	0.9048|0.9091|0.931|0.9
C04F6.3	55|365|388|486|492|571|600|846|1015|1260|1395|1407|1530|1656|1750|1774|1812|1960	0.9304|0.9158|0.977|0.9557|0.95|0.9515|0.9952|0.9791|0.9231|0.9547|0.9072|0.9296|0.9049|0.9618|0.9875|0.954|0.9333|0.9375
C04F6.4a.1	337|801|802|1808|2008	0.9143|0.9429|0.9167|0.9138|0.9412
C04F6.5	123|245|246|724	0.9024|0.9153|0.9265|0.9714
C04G6.4	77|99|827|886|1114	0.9062|0.9375|0.9375|0.9333|0.9048
C04H5.6a	952|2727	0.9167|0.931
C05A9.2	416	0.9259
C05B5.4	226	0.9048
C05B5.8	459	0.913
C05C10.2a	4633	0.9167
C05C10.2b	3566|4267|4525|4554	0.9355|0.9032|0.9048|0.9286
C05C10.3	780|1294	0.9355|0.9
C05C10.5a	211	0.9
C05C10.6b	62|739|894|2270|2507	0.92|0.907|0.9333|0.9032|0.9048
C05C8.2	687	0.9059
C05C8.3.1	357|636|742	0.9136|0.9808|0.9821
C05C8.4	1792|1889|2093|2845|3140|3217|3218|3335	0.9474|0.913|0.9286|0.9038|0.902|0.9091|0.9512|0.9697
C05C8.5	553|1130|1780	0.9348|0.9333|0.9048
C05C8.6	21|268|602|834|1479	0.9143|0.9048|0.9091|0.9259|0.9636
C05C8.7.2	1610	0.9091
C05C8.7.3	961|1024	0.9091|0.9355
C05C8.9a.1	808|966	0.9531|0.9091
C05D10.1a	618|1044	0.9167|0.9535
C05D11.1	1175|1485|1760|2064|2334|2748|2761|3075	0.9231|0.9167|0.931|0.9545|0.9677|0.9322|0.9423|0.9118
C05D11.11b.1	677|834|1062|1094|1196|1302|1500	0.92|0.9565|0.9718|0.9054|0.9643|0.9231|0.9
C05D11.11b.2	656|813|1041|1175|1234|1281	0.9091|0.9512|0.9508|0.9322|0.9091|0.9167
C05D11.11b.3	641|798|1026|1058|1160|1266	0.913|0.9545|0.9318|0.9615|0.9111|0.9
C05D11.12.1	231|1143|1146|1212|1272|1841	0.9362|0.9444|0.9556|0.95|0.9524|0.9375
C05D11.12.2	195|1107|1176|1805	0.9111|0.92|0.9355|0.913
C05D11.3	352	0.9481
C05D11.7b.1	2857	0.9091
C05D11.9	1049|1391|1793|1883	0.9429|0.9487|0.9|0.9231
C05D12.4	878	0.9091
C05D2.10a	1403	0.9
C05D2.6a.2	944	0.9167
C05D9.1.1	471|472	0.9|0.92
C05D9.5	10|75|445|635	0.9375|0.9412|0.9455|0.9508
C05D9.7	381|707	0.9785|0.9753
C05E11.1a	475	0.96
C05E11.3a.1	196|1078|1080|1083|1225	0.9661|0.9091|0.9524|0.9524|0.9487
C05E4.9a.1	145|635|696|790|1046|1303|1378|1453|1498|1622|1836|1880|1883|2146|2147|2216|2291|2850|3106	0.9057|0.9143|0.9028|0.9524|0.9286|0.9118|0.9167|0.96|0.9358|0.9852|0.954|0.9043|0.9344|0.9182|0.969|0.9286|0.9041|0.963|0.9231
C05E4.9a.2	124|635|696|758|767|790|1046|1048|1094|1300|1303|1378|1447|1453|1498|1622|1836|1880|1883|2146|2147|2216|2291|2850|3106	0.9091|0.9457|0.9145|0.931|0.9355|0.95|0.9355|0.9231|0.9344|0.931|0.9231|0.9231|0.9|0.9643|0.96|0.9901|0.9492|0.95|0.9753|0.9493|0.9777|0.9286|0.9421|0.9799|0.952
C05E7.1	617|801|864	0.9091|0.931|0.9375
C05G5.4.1	388|448|507|566|725	0.9444|0.9359|0.9|0.9538|0.9643
C05G5.4.2	388|566|725	0.9032|0.967|0.9646
C06A1.1	110|663|767|1167|1282|1741|1962|1990|2258|2419|2421|2615	0.9701|0.94|0.9|0.9394|0.95|0.9808|0.931|0.9595|0.9375|0.9516|0.9718|0.9143
C06A1.5	363|365	0.9245|0.9689
C06A5.3a	677|915|1276|1661|2358	0.9355|0.9286|0.9394|0.9524|0.9333
C06A5.3b.1	1719	0.92
C06A5.7a.2	888|928	0.9388|0.9167
C06A5.7b	648	0.931
C06A5.9	191|442	0.9048|0.9091
C06A6.2b	1538|1634	0.907|0.92
C06A6.3.1	71|793	0.9663|0.9
C06A6.4b.1	759|810|991	0.9333|0.9333|0.9545
C06A6.5	893|1228	0.9|0.9333
C06A8.1a.2	653|1888|2243	0.9412|0.931|0.9512
C06A8.1b.1	2047	0.913
C06A8.1b.2	669|812|1648|2047|2402	0.9024|0.9091|0.9211|0.9375|0.9556
C06A8.2	596|809|912|1081	0.95|0.9636|0.9032|0.9565
C06A8.3	350|383|474|477	0.9416|0.9257|0.9096|0.9905
C06A8.5	176|745|1214|1502	0.95|0.9706|0.9138|0.9032
C06B3.3	962|1187	0.931|0.9487
C06B8.7	6545|6789|8927|8939|9212	0.9|0.913|0.9048|0.9091|0.9118
C06B8.8.1	195	0.9885
C06B8.8.2	182	0.9679
C06B8.8.3	182	0.9587
C06B8.8.4	182	0.9857
C06B8.8.5	182	0.9778
C06B8.8.6	182	0.9735
C06B8.8.7	182	0.9716
C06C3.1a	384|683|1122|1743|2649|2856|3138|3380	0.9459|0.9375|0.92|0.9459|0.9394|0.9048|0.9318|0.9231
C06C3.4	592	0.9429
C06E1.1	229|230|259|337|365|378	0.9794|0.9746|0.916|0.9091|0.9259|0.9492
C06E1.8	674|1437	0.9|0.9032
C06E1.9	1400	0.9211
C06E2.5.2	108|326|461|574|620	0.9032|0.9545|0.9111|0.974|0.9
C06E4.2b	206	0.9333
C06E7.1a	233|348|351|485|561|564|1315|1371|1403	0.9701|0.9512|0.9556|0.9118|0.9|0.9259|0.92|0.9074|0.9677
C06E7.3a.1	41|265|380|383|517|593|596|940|1001|1344|1392|1446|1448|1524	0.918|0.9535|0.9615|0.9592|0.9333|0.9028|0.9123|0.9048|0.9211|0.9091|0.9167|0.9189|0.9429|0.9
C06E7.4a	716|995	0.95|0.92
C06E7.88	278|331	0.9|0.9811
C06G1.1a	153	0.913
C06G1.2	101|326|443	0.9048|0.9333|0.913
C06G1.4	538|794|1060|1094|1212|1675|2120|2439|2723|2951|2997|3106|3197|3346	0.9856|0.9043|0.9655|0.9661|0.9677|0.9216|0.9669|0.9481|0.9|0.95|0.9123|0.9464|0.92|0.9091
C06G3.10	74|78|108|1147|1210	0.925|0.9474|0.907|0.9574|0.9434
C06G3.11	214	0.963
C06G3.1a.1	1135	0.9048
C06G3.2	794|2057|2476	0.9189|0.9189|0.9333
C06G3.5a	65|142|372|374|426|919	0.9184|0.9649|0.9048|0.9|0.9589|0.9149
C06G3.6	22|221|237|556|710|882|1430|1573|1613|1645	0.913|0.9333|0.9487|0.9737|0.9355|0.9457|0.9268|0.9667|0.9672|0.9348
C06G3.8a.2	489	0.9
C06G3.9.1	2151|2230	0.9318|0.907
C06H2.1.1	130|172|175|461|602|631|633|635|636	0.9294|0.9733|0.9895|0.95|0.9167|0.9153|0.9471|0.9434|0.9062
C06H2.1.2	130|172|175|461|620|633|635	0.9457|0.9765|0.9873|0.9727|0.9275|0.9456|0.9423
C06H2.3b	338|340	0.9032|0.9
C06H2.6a	246|420|503	0.9286|0.942|0.9535
C07A12.1b	286|760	0.9|0.9091
C07A12.4a.1	363|494|716|747|993|1203|1595|1759|1791	0.9331|0.9667|0.9527|0.9945|0.9459|0.9158|0.962|0.9343|0.9985
C07A12.4b.2	1395|1591	0.9|0.9667
C07A12.4c.2	1393	0.9583
C07A12.5a	760|801|1141|1143|1405|2378	0.92|0.913|0.913|0.931|0.9091|0.9091
C07A12.7a.1	47|414|619|1259|1262	0.9649|0.9138|0.925|0.9487|0.9
C07A12.7b.1	47	0.9048
C07A9.3a	590|608|743|746|915|975|1491|2332|2804|2817|3115|3117|3136|3168|3419|3535	0.9302|0.9359|0.9|0.9155|0.9136|0.9565|0.9683|0.9143|0.9118|0.931|0.963|0.932|0.9138|0.9167|0.9577|0.9375
C07A9.3c	2873|3156	0.9259|0.9048
C07A9.7a	545	0.913
C07B5.5	299|703|733	0.9091|0.9565|0.9535
C07D10.2a.1	541|726|1029|1032	0.9048|0.9231|0.9091|0.913
C07D10.2b.1	440|1053	0.931|0.9048
C07D10.5	476	0.9786
C07D8.6	41|206|334|408|546|849|968|1113	0.9259|0.9367|0.9444|0.9468|0.9701|0.9783|0.9091|0.9362
C07E3.1a.1	1710|2469	0.9167|0.9
C07E3.2	8|1974|1977|2079	0.9|0.9231|0.9|0.9189
C07E3.3a	446	0.9091
C07E3.6	185|485	0.9333|0.92
C07F11.1	528|2617|3686|3797|3986|3990	0.9|0.9286|0.913|0.9062|0.913|0.9231
C07G1.3a	322|406|410|1420|2238|2240	0.9459|0.9|0.9362|0.9524|0.9091|0.9412
C07G1.4a	742|917|1170|1385	0.9|0.9259|0.9|0.9
C07G1.5.1	643|1905|2468	0.9286|0.9231|0.9412
C07G1.5.2	2421	0.9
C07G1.8	103	0.9333
C07G2.1a	960|1817	0.9091|0.9167
C07G2.2a	59|1389|1749|1869|1970|2067	0.9091|0.9259|0.9524|0.9583|0.9412|0.9
C07G2.2b	909|1758|1878|2072	0.9143|0.95|0.9032|0.9077
C07G2.3a.2	18|291|301|593|739|1094|1852|1854|1858	0.9007|0.938|0.9245|0.9667|0.961|0.9505|0.9681|0.9816|0.9405
C07H4.2	787|940|985|1457|2370	0.9556|0.913|0.9048|0.9149|0.92
C07H6.4	1761|2564|2580|2723	0.913|0.9118|0.9091|0.9
C07H6.5	358|878|1037|1288|1364|1691|1767	0.9565|0.9302|0.9444|0.9091|0.963|0.9535|0.9474
C08B11.1.1	189|240|1368|1981	0.92|0.9429|0.9167|0.913
C08B11.2	518	0.9062
C08B11.3a	1878|2119|2301|2510|2954|3292|3329|3646|3758	0.9057|0.9167|0.9608|0.9365|0.925|0.963|0.913|0.95|0.9365
C08B11.3b	3163	0.913
C08B11.5	134|665|701|1244	0.9072|0.9733|0.9143|0.9651
C08B11.6	772|875	0.9091|0.9355
C08B11.7.2	363|591	0.9245|0.9506
C08B6.4a	1086|1220	0.9878|0.9
C08B6.7b	101|359|638|676|1394|1640|1953|2127|2357|2394|2604	0.9123|0.9375|0.9048|0.9592|0.9318|0.9024|0.9091|0.9661|0.9231|0.9077|0.9221
C08B6.9	461|565|840|969	0.9062|0.9143|0.9545|0.9259
C08C3.4b	423	0.913
C08D8.2b	1910	0.913
C08F1.10	408|495|497|510|577	0.9577|0.9182|0.9107|0.9167|0.9542
C08F1.11	710	0.9
C08F1.6	103|316|794	0.9091|0.9677|0.9014
C08F11.8.1	269|1495	0.9444|0.9259
C08F8.1a	63|238|394	0.943|0.9688|0.9845
C08F8.3a	240|727|1241|1248|1336	0.9545|0.9512|0.9273|0.9524|0.9474
C08H9.2a	58|218|721|841|843|940|979|1344|1348|1832|2016|2050|2206|2471|2548|2997|3132|3941|4019	0.9091|0.9062|0.9733|0.9|0.9271|0.9615|0.9302|0.9444|0.9259|0.9437|0.99|0.902|0.9048|0.9|0.9331|0.9429|0.913|0.9282|0.9654
C08H9.2b	3134	0.9
C09B8.4	592	0.94
C09B8.5	714	0.9167
C09B8.7a	114|115|714|1188|1322|1325	0.9211|0.9565|0.9535|0.9565|0.925|0.9615
C09B8.7b	116|117|1315	0.9048|0.9167|0.9032
C09C7.1	400|487	0.9333|0.9231
C09D4.5.2	547	0.9028
C09D8.1b	1829|4199	0.9091|0.9333
C09E7.4.1	370	0.9286
C09E7.4.2	370|434	0.9231|0.9048
C09E8.1a	494	0.9048
C09E8.3	1462|1752|2165	0.9412|0.9459|0.9
C09F5.1a	589|747|1027|1071|1258|1423|1589|1732|1832|1927	0.9556|0.9091|0.9683|0.9184|0.9|0.9369|0.9375|0.959|0.9111|0.9333
C09G4.1a.1	300|945|1440|1538|1614	0.9143|0.9444|0.95|0.9333|0.9444
C09G4.2b.2	259|766|1495|1498|1541|1656	0.9474|0.9474|0.9231|0.9333|0.9355|0.95
C09G4.3	88|128|339|356|408|417|587	0.9845|0.9459|0.9091|0.9565|0.913|0.9225|0.9143
C09G4.4	349	0.9286
C09G5.2a	16	0.9048
C09G9.2a	621|625|880	0.9459|0.9048|0.9429
C09G9.6	172|300|558|772|1171|1174|1183|1300	0.9167|0.9167|0.9|0.9028|0.9551|0.95|0.9091|0.9011
C09H10.2.1	152|249|272	0.9468|0.9934|0.9583
C09H10.2.2	152|249|272	0.9787|0.9929|0.9437
C09H10.3	534|596|729|745|783|1095|1337|1414|1435	0.9167|0.9231|0.9397|0.9577|0.9237|0.9032|0.9434|0.9124|0.9317
C09H10.5a	940	0.9
C09H10.5c	924	0.9
C09H10.6	163|268|272|544|693	0.918|0.9385|0.9149|0.931|0.9231
C09H6.1b	2242|3459	0.9091|0.9211
C09H6.2a	1944|3284|3288	0.9091|0.92|0.913
C09H6.2b	1763|1859|1860|2514	0.9375|0.9286|0.9394|0.931
C10B5.3	135	0.9048
C10C5.6b	5645	0.9091
C10C6.5.1	878|1344	0.9091|0.9
C10C6.6	683|1242|1833|2406|2568|2748|2958|3191|3489|3676	0.9592|0.9375|0.9138|0.9277|0.9483|0.9545|0.9167|0.939|0.967|0.9245
C10E2.6	699|1224|2060|2266	0.9286|0.9545|0.9|0.9259
C10F3.2	1068	0.9
C10F3.5a	378|660	0.9242|0.925
C10F3.7	246|626	0.9487|0.9714
C10G11.5a	246|1395	0.9259|0.9048
C10G11.7a.1	685|895|934|1231	0.9167|0.913|0.9048|0.92
C10G11.7a.2	187|217|220|586|685|892|895|898|901|934|1042|1213|1228|1232|1258|1262|1460|1463	0.9417|0.9717|0.9688|0.9608|0.9824|0.9091|0.9911|0.9892|0.973|0.9725|0.9203|0.9336|0.9671|0.9852|0.9037|0.9395|0.9863|0.9918
C10G11.7a.3	187|217|220|586|685|892|895|898|901|934|1042|1213|1229|1233|1259|1263|1461|1464|1611	0.9379|0.9903|0.9697|0.9483|0.9776|0.9434|0.9956|0.9905|0.957|0.9617|0.9425|0.9447|0.9722|0.9918|0.9149|0.9526|0.9914|0.994|0.9195
C10G6.1a.1	762|1833	0.9259|0.9583
C10G8.5b	1459|1520|2788	0.92|0.9512|0.9032
C10G8.6	561|644	0.9143|0.9286
C10H11.1	1461|3080	0.9459|0.9286
C10H11.9	596|1654|1709|2050|3813|3816|3883|4219|4314	0.9091|0.913|0.9231|0.9298|0.9333|0.9459|0.9048|0.9483|0.9
C11D2.4	482|774|1230	0.9459|0.9024|0.9048
C11D2.7	53|89|122|575|576	0.9494|0.9556|0.9355|0.9|0.9318
C11E4.1	154	0.9048
C11G6.4a	328	0.92
C11H1.2	338|1113	0.931|0.9048
C11H1.3	1661	0.9429
C11H1.9a	248	0.9118
C12D8.10a.1	458|594|1004|1551	0.9375|0.9394|0.9459|0.9355
C12D8.10a.2	458|594|1004|1551	0.9111|0.9|0.9474|0.9512
C12D8.11.2	1504	0.9
C12D8.1a	616|1430|1703|1853	0.9167|0.9626|0.9375|0.9394
C13B4.2	510|1060|1502|1584	0.9008|0.9385|0.9403|0.92
C13B9.3.1	151|563|820|1351|1393	0.9615|0.9211|0.9|0.9737|0.9423
C13B9.3.2	395|563|1351|1375|1393	0.9216|0.9423|0.9775|0.913|0.9429
C13C4.4	102	0.9
C13F10.2	154|342|474	0.9048|0.9324|0.9167
C13F10.4	764|1833|2113|3162|3966|4125|4199|5620|6063|6556	0.9286|0.9167|0.9091|0.9355|0.9048|0.9259|0.913|0.9216|0.9286|0.95
C13F10.5	190	0.9375
C13F10.6a	325|721|764|911|1097	0.9|0.9375|0.9434|0.9286|0.9016
C13G5.1.1	821	0.9091
C13G5.2.1	104|277	0.9259|0.95
C14A11.3a	1470	0.9
C14A4.1	258|334|372|619|914	0.9789|0.9394|0.9444|0.9615|0.9074
C14A4.10	391	0.9459
C14A4.11	483|540|592|931	0.9009|0.9615|0.9079|0.9062
C14A4.2	345	0.9474
C14A4.3	1916	0.9
C14A4.5	456	0.9412
C14A4.9	82|103|223|379|394|463	0.9674|0.9474|0.9706|0.976|0.9618|0.95
C14B1.1.1	300|575|578|665|671|1064|1066|1307|1342|1457|1459	0.9825|0.9487|0.92|0.9646|0.9209|0.902|0.9449|0.9341|0.9735|0.9202|0.9688
C14B1.1.2	285|650|1051|1327|1333|1334|1444	0.9091|0.9333|0.9412|0.9706|0.9159|0.9263|0.9785
C14B1.2	405|478|628	0.9459|0.9355|0.9268
C14B1.3	815	0.92
C14B1.4.1	135|185|186|1101	0.9048|0.9808|0.962|0.9429
C14B1.4.2	1251	0.9231
C14B1.5	488|1016	0.9|0.9
C14B1.8.1	651	0.9
C14B9.1.1	133|345	0.9429|0.9524
C14B9.2	270|738|768|777|955|970|1281|2004|2019	0.9205|0.963|0.9457|0.9143|0.9636|0.9016|0.9304|0.9268|0.9571
C14B9.4a	34|341|490|718|753|1038|1082|1145|1190|1447	0.9302|0.9583|0.902|0.9565|0.931|0.9483|0.9048|0.9344|0.9837|0.9667
C14B9.7	182|261	0.9587|0.9732
C14B9.8a	1892	0.92
C14C10.3a	348|745|1079|1988	0.9|0.9062|0.9444|0.9
C14C11.3	1631|1800	0.913|0.9
C14C11.7	135|157	0.9079|0.9661
C14C11.8b.1	342|786|798|1006|2260	0.9091|0.9143|0.9672|0.9245|0.9032
C14F11.1a.1	252|1181	0.9032|0.9512
C14F11.2	778|1337|1361|1554|1916|1918	0.9091|0.9318|0.9348|0.931|0.9583|0.9048
C14F11.6.1	494	0.9545
C14F5.1a	146|361|445|671|951|953|1015	0.9496|0.9545|0.9126|0.9333|0.9091|0.9843|0.9444
C14F5.4	763|1007	0.9167|0.9
C14F5.5	82|231|1240|1357	0.9077|0.9032|0.916|0.9167
C14H10.1	846|859	0.9412|0.9091
C14H10.2a	644|1427|1649|1808|1945|2255|2385	0.931|0.9091|0.9574|0.9429|0.9623|0.9024|0.9556
C14H10.2b.1	1582|1741|1878	0.913|0.9|0.913
C15B12.7a	1203|1460|1641	0.931|0.9286|0.931
C15C6.1	41|126|464	0.9091|0.9688|0.9538
C15C7.5.1	282|592|594	0.96|0.9091|0.9259
C15C7.5.2	74|282|574	0.9355|0.9643|0.9512
C15C7.7	1206	0.931
C15C8.7	199|394|437	0.9474|0.9516|0.95
C15F1.4	445|446	0.9|0.9
C15F1.6	663|747|865|1038	0.9634|0.9079|0.9464|0.9114
C15F1.7a	98|257|420|545	0.9048|0.9537|0.9478|0.931
C15F1.7b.1	51|297|373	0.9355|0.9118|0.9386
C15F1.7b.2	360	0.9459
C15H11.4.1	40|449|775|926|998	0.9107|0.9153|0.9556|0.9135|0.9062
C15H11.7	188|293|296|345|851	0.9286|0.9811|0.931|0.9|0.9231
C15H11.8.1	454	0.9
C15H11.9	140|160	0.9259|0.94
C15H9.11.1	361	0.9091
C15H9.5.1	1697|2160|2161	0.913|0.9091|0.9
C15H9.6a.1	310|574|585|904|1353|1646|1647|1722|2170|2499	0.9241|0.9189|0.9823|0.9048|0.9337|0.9307|0.9105|0.9648|0.9167|0.9545
C15H9.6a.2	31|215|295|306|625|1074|1359|1367|1368|1443|1891|2218|2220|2311	0.9582|0.9176|0.9681|0.9839|0.947|0.9436|0.9138|0.9454|0.9379|0.937|0.95|0.9104|0.955|0.9355
C15H9.6a.5	15|279|290|609|1058|1351|1352|2204|2295	0.978|0.9592|0.9612|0.9306|0.9511|0.9596|0.9163|0.9435|0.9286
C15H9.6b.3	632	0.9
C15H9.7	1061|1352|1389	0.913|0.9474|0.9259
C15H9.8a	1037	0.9231
C16A11.6	270	0.9048
C16A3.4.1	206	0.9
C16A3.5.1	547|556|563	0.9392|0.9416|0.9812
C16A3.6	130|891|894|1103	0.9048|0.9355|0.9556|0.9333
C16A3.7	491|1143|3008	0.9|0.9|0.9487
C16A3.8	2933|4076	0.9|0.9091
C16A3.9	320|419	0.9907|0.9887
C16B8.3	218	0.9
C16C10.11.2	10|38|71|72|87|110|111|113|308|311|314|317|472|613|676	0.914|0.9459|0.9182|0.9559|0.951|0.9032|0.9735|0.9856|0.9846|0.9891|0.9848|0.9178|0.9224|0.974|0.9697
C16C10.2	312|701	0.9615|0.92
C16C10.3	3488	0.9167
C16C10.4.3	626	0.9
C16C10.5	962|981|1098	0.904|0.9286|0.981
C16C10.6	332|485|494	0.9388|0.931|0.9429
C16C10.7a	623	0.9565
C16C10.8	93|416	0.9636|0.92
C16C2.2a.1	2506|2527	0.9048|0.913
C16C2.3b.1	608|1584	0.9091|0.9
C16C2.4a	26|319|503|524	0.9487|0.931|0.9412|0.913
C16C8.11	456	0.9
C16C8.2	1904|2067|2113	0.92|0.9333|0.9
C16C8.4	136	0.9
C16E9.2a	845|1401	0.9118|0.9423
C16H3.2	191|279	0.9583|0.9
C16H3.3a	696|1173|1571	0.9062|0.9259|0.9429
C17D12.1a	944	0.907
C17D12.7	2471	0.9231
C17E4.10a.1	414|717|1259|1281	0.9302|0.9048|0.9|0.9016
C17E4.10a.2	1256	0.9091
C17E4.2	49|163	0.9286|0.9286
C17E4.20	861|970|1401|1507|1509|1669	0.9857|0.913|0.9812|0.9206|0.9828|0.9107
C17E4.5	720	0.9531
C17E4.6	615|1046|1302	0.931|0.9524|0.9048
C17E4.9a.1	1540|1887|1891|1971|2109|2206|2208	0.9787|0.9887|0.9722|0.9459|0.9359|0.9286|0.9677
C17E7.4	581|789	0.9091|0.9259
C17E7.9b	557	0.9286
C17F4.5	1007	0.9
C17G1.4a	1889|2479|2695|2772	0.9048|0.9091|0.9|0.931
C17G1.5	599	0.9375
C17G1.7	648|1137	0.9538|0.9014
C17G1.8.1	456|607|610|915	0.9091|0.963|0.9524|0.92
C17G10.1.1	1063|1414|1415	0.92|0.9167|0.9355
C17G10.4a.2	74	0.9167
C17G10.4c.1	1061|1298|1322|1670|2326|2335	0.942|0.913|0.9286|0.9041|0.9375|0.9275
C17G10.5.1	462|793	0.9355|0.931
C17G10.8	50|1230	0.9355|0.9286
C17G10.9a	1604|1605|1737	0.9259|0.9118|0.9459
C17G10.9b	1519|1598|1599|1731	0.9118|0.9455|0.9273|0.963
C17G10.9e	1528|1740	0.9231|0.9375
C17H12.1	104|106|107|900|2102|2310	0.9444|0.9394|0.9444|0.9333|0.9211|0.9459
C17H12.13a	1060	0.9016
C17H12.14	490|722|786|814|955|1087	0.9053|0.9625|0.9911|0.9595|0.9937|0.9091
C17H12.9	922|925|990	0.9535|0.9048|0.9091
C18A11.7a	1177|1183|1221|1254|1574|1673|2185	0.9|0.9257|0.9259|0.9901|0.9583|0.9619|0.9367
C18A11.7b	300	0.9636
C18A3.2.2	1054	0.9375
C18A3.3	194|203|378	0.9118|0.9091|0.9014
C18A3.5a	584|621|769|1348|1439|1535|1572	0.981|0.9461|0.9|0.9259|0.9417|0.96|0.9494
C18A3.6a	682	0.92
C18A3.8	256	0.907
C18B12.4	276|663|1087|1091|1243|1333	0.9333|0.9672|0.9167|0.92|0.9348|0.9167
C18B2.4	396|426|777	0.931|0.9231|0.9091
C18B2.5a	32|113|809|1171	0.9091|0.9|0.9623|0.9231
C18C4.10a.1	1662	0.9
C18C4.10b.2	171|182|751|985|1170|1743|1824	0.9359|0.96|0.9|0.9444|0.9048|0.9322|0.9057
C18D1.1a.1	691|1340|2078|2108|2281|2450|2480	0.913|0.9038|0.9231|0.9118|0.9524|0.9524|0.963
C18D1.1a.2	1263|2204|2373|2380|2403|2574	0.907|0.9032|0.9211|0.9048|0.9556|0.9057
C18D11.1	80|227	0.9206|0.9118
C18D11.3.2	1268	0.9048
C18E3.2.2	413|484|676|740|987	0.9512|0.9041|0.9048|0.9348|0.9649
C18E3.3	547|2780	0.9048|0.931
C18E3.5	503	0.9167
C18E3.9a	294|728	0.9048|0.9512
C18E9.10a	695	0.9091
C18E9.11a	366|370|714|934|1181	0.9118|0.9294|0.9429|0.913|0.9643
C18E9.2a	581|1025|1106	0.9524|0.9605|0.9143
C18E9.3f.1	402	0.9091
C18E9.4.1	111|275	0.9351|0.9833
C18E9.6	602|872	0.9091|0.9375
C18E9.9	389	0.9091
C18F10.7a	12|1215|1354	0.9|0.9062|0.9429
C18F3.4a	798	0.9184
C18F3.4b	753	0.9268
C18G1.2a	282	0.9118
C18G1.5	299|356|450|606|677|678|764	0.9111|0.9538|0.9439|0.9574|0.9816|0.9524|0.9129
C23G10.2a.1	307	0.9412
C23G10.2a.2	161	0.9259
C23G10.3	265|777	0.9883|0.9221
C23G10.4b.1	2531	0.9091
C23G10.4b.2	294|788|1323|1704|1705|1726|1965|2503|2534|2558|2600|2949|2953|2964	0.9231|0.9041|0.9231|0.9211|0.9535|0.918|0.9118|0.9595|0.9778|0.9655|0.9556|0.9091|0.9444|0.9677
C23G10.7c	1254|1680	0.9048|0.9286
C23G10.8	448|449|567|780|825|1593|1596|2235|2374|2631|2840	0.92|0.9265|0.9492|0.9412|0.9565|0.9826|0.9|0.92|0.9556|0.9174|0.9024
C23H3.5	872	0.9524
C24A1.2a.1	943	0.9
C24A11.8a	965	0.92
C24A3.2a.1	225	0.9118
C24A3.6.2	879|1316	0.9091|0.9259
C24A8.4	1156|1242	0.9189|0.9
C24B5.2a	1132|1186|1291	0.9|0.913|0.9259
C24B5.2c	479|1407|1474	0.9|0.9|0.931
C24B5.3	1819|2279|2977	0.9048|0.9|0.9474
C24D10.6	270|305|325|484	0.9091|0.9444|0.9016|0.9444
C24F3.1a	287|520|1042|1045|1048|1051|1102|1277|1420|1468	0.9216|0.9235|0.9718|0.9828|0.9878|0.9688|0.9034|0.9423|0.9293|0.9231
C24F3.1b	1048|1051|1054|1057|1283|1426	0.913|0.9565|0.9688|0.9231|0.9062|0.9344
C24F3.4a	320|1121|1994	0.9048|0.9048|0.9032
C24G6.4	1203|1771|1851|2015	0.9|0.9091|0.9167|0.9074
C24G6.8b.1	238|334|427	0.9167|0.9118|0.9455
C24H10.1	46|202|611|810	0.9216|0.9412|0.9|0.9167
C24H10.2	462	0.9
C24H11.7a	256|4720|4763|5526|5694|6007	0.9048|0.9091|0.9|0.9474|0.9167|0.9189
C24H12.1	542|872	0.9167|0.907
C24H12.4a	218|798|897|1136|1317|1464|1578|1859	0.9|0.9286|0.9571|0.913|0.9091|0.9062|0.9231|0.9565
C25A1.1	348|719	0.9843|0.9756
C25A1.10a.2	1906	0.9143
C25A1.11a	447|1328	0.913|0.9365
C25A1.12b.1	652|967|1324	0.9333|0.92|0.9231
C25A1.12b.2	1268	0.9048
C25A1.13	50	0.9038
C25A1.16a.1	148|238|281|547	0.9572|0.9382|0.9231|0.9615
C25A1.16a.2	134	0.907
C25A1.3	456|725|1017	0.9048|0.9062|0.9
C25A1.4.1	538|1340|1343|1482|1597|1600	0.9091|0.9638|0.9|0.9091|0.937|0.9552
C25A1.4.2	1298	0.9
C25A1.5	343|1164	0.9032|0.908
C25A1.8	47|366|369|550	0.9536|0.9893|0.9946|0.9304
C25A1.9a	773|1113	0.9|0.9718
C25A11.4b	3483|4771	0.9|0.9733
C25A11.4c.2	4835|4995	0.92|0.9
C25B8.3a	90|722	0.96|0.9459
C25B8.4a	111|658	0.9359|0.9456
C25D7.10	69|735	0.92|0.9
C25D7.6	323|1156|1198|1315|1882|2194|2331|2459|2497	0.9|0.9688|0.9429|0.9083|0.9315|0.9375|0.9141|0.9603|0.948
C25D7.7	569|588	0.9167|0.9592
C25D7.8.1	316	0.9211
C25D7.8.2	316|725	0.9348|0.9
C25F6.1	280	0.9333
C25F6.2a	247|496|499|825|1425|1449|1525|1546|1779|2313|2449|3082|3279|3353|3427|3429|3461|3482|3491|3598	0.9459|0.92|0.9211|0.9259|0.9459|0.9439|0.9143|0.9774|0.9621|0.9195|0.9847|0.9167|0.9718|0.9394|0.9671|0.9856|0.963|0.9577|0.9388|0.9384
C25F6.3	322|630|727|747|2298|3233	0.9062|0.9483|0.9|0.9143|0.9701|0.9
C25F6.7b	817|915|1080	0.9091|0.9|0.9375
C25G4.10a	604|735|1647|2185|4313	0.913|0.9|0.9643|0.92|0.9333
C25G4.5	244|526|713|1462|1478|2494|2531|2596|2849|2852|3033|3471|3960	0.9512|0.9143|0.9111|0.9524|0.9412|0.9322|0.9259|0.9324|0.9429|0.9524|0.9333|0.9744|0.9091
C25G6.2.1	471|1037	0.92|0.9123
C25H3.12	484	0.9048
C25H3.4.1	1306	0.9048
C25H3.6a	698|704|812|1190|1493	0.9474|0.92|0.92|0.9747|0.9091
C25H3.7a	340	0.931
C25H3.9a	302|388|576	0.9091|0.9661|0.9569
C26B2.1	651	0.9189
C26B2.3a.1	1467	0.9
C26B2.6	327|637|638|747|750|969|971|972	0.9091|0.9273|0.95|0.9167|0.9091|0.9167|0.9583|0.9636
C26B9.3	85|942	0.931|0.9429
C26B9.5	901	0.9048
C26C6.1a	84|591|738|1378|1380|1389|1588|2882|3725|3728|4067|4264|4387|4510|4615|4810|4813|5096|5100|5217|5833|5893	0.9091|0.96|0.9|0.9286|0.9048|0.9032|0.9091|0.9636|0.9556|0.9535|0.92|0.9722|0.9643|0.9672|0.9375|0.9091|0.9048|0.9352|0.9455|0.9205|0.9059|0.9146
C26C6.1b.1	4170|4293|4416|5123|5739	0.9333|0.9394|0.9048|0.9268|0.9048
C26C6.2	143|203|836|842|1007|1074|1161|1682|1718|1812|1907|1953	0.9398|0.9|0.9457|0.9709|0.9429|0.931|0.9318|0.9375|0.9603|0.9856|0.9259|0.94
C26C6.5a	742|1156|1168|1218|1652|1717|1825|2049|2077|2600|2705	0.9524|0.9|0.9355|0.9286|0.9|0.9388|0.9615|0.92|0.9|0.913|0.9091
C26D10.1	274|1631|2017	0.9444|0.9385|0.9
C26D10.2a	426|548|1155|1268|1303	0.9151|0.9289|0.9708|0.9086|0.9524
C26E6.2	32|899|989	0.9231|0.9048|0.9143
C26E6.4	1544|1557|1996|3461|3499|3528|3747	0.925|0.931|0.9|0.9394|0.9167|0.9268|0.9574
C26E6.5	232|433|629|710|713|899|939	0.9111|0.9726|0.962|0.9746|0.9492|0.9487|0.9118
C26E6.6	616	0.9048
C26E6.8a	271|812|839|1072	0.9167|0.931|0.9111|0.9231
C26F1.1a	200|304	0.9327|0.95
C26F1.1b	360|464	0.9434|0.9524
C26F1.4.1	311	0.9649
C26F1.4.2	311|356	0.9745|0.9203
C26F1.4.3	309	0.9747
C26F1.5	441|562	0.9355|0.9487
C26F1.9	44|161|164|173	0.9848|0.9845|0.9953|0.9218
C27A12.10	221|460	0.918|0.9084
C27A12.2	30|814|1225|1572	0.9375|0.9189|0.9111|0.9184
C27A12.7a.1	170|607|989	0.9231|0.9|0.9048
C27A12.7a.2	136|955|1590	0.9394|0.9062|0.9535
C27A12.8.1	1788|1789	0.9667|0.9
C27A12.8.2	1708	0.913
C27A2.1	298|1557|1560|1610|2284|2304|3090	0.9333|0.9|0.913|0.9091|0.9429|0.9167|0.9268
C27A2.2a	323|354	0.9604|0.96
C27A2.3.1	413|535|539|542|752|803|907	0.9758|0.961|0.9747|0.9545|0.9|0.9423|0.9292
C27A2.6	413|1715|1763|2059|2218	0.9556|0.913|0.9111|0.9403|0.9
C27A2.8	317	0.913
C27B7.1a	226|296|915|958|1088	0.913|0.9048|0.9091|0.9|0.9167
C27B7.4	1290|1387|1831|2370|3648|3768|4115	0.913|0.9|0.9048|0.9048|0.9649|0.9136|0.9444
C27B7.8	273|364|750|936|1111	0.9775|0.9275|0.9184|0.9718|0.9398
C27C7.1	17	0.9048
C27D11.1	20|236|279|448|799|947|1192|1213|1216|1279|1360|1399|2812|2877|3177|3380|3381	0.9273|0.9583|0.9178|0.9296|0.9667|0.907|0.92|0.9672|0.9556|0.973|0.9286|0.9432|0.9302|0.9074|0.9342|0.9273|0.922
C27D6.4a.1	420|575|716|937|1171|1553|1575|1578	0.9|0.9551|0.9074|0.963|0.9043|0.9375|0.9048|0.9231
C27D6.4b	304|380|383|473|510|612	0.9|0.9091|0.9091|0.9062|0.9333|0.9231
C27F2.10.1	323|726|819|831|1046|1401	0.9333|0.9333|0.9268|0.9|0.907|0.9111
C27F2.10.2	1368	0.9167
C27F2.4	281	0.9211
C27F2.8	4386|4389|5541|5571	0.907|0.9048|0.9348|0.9167
C27F2.9	347|350|688	0.9412|0.9559|0.9048
C27H5.3a.1	262|265|458|964|1588	0.9355|0.9048|0.9459|0.9211|0.9032
C27H6.2	251|273|897|1556|1564	0.931|0.9286|0.9167|0.9661|0.9
C27H6.3	1125	0.9167
C27H6.4a	119|716	0.9143|0.9302
C27H6.8	158|510|647|650|908|1154	0.92|0.9333|0.9024|0.9672|0.9157|0.94
C27H6.9	29	0.913
C28A5.4a	212|248|343	0.9406|0.9362|0.9091
C28C12.7a	153|156|328|330|480|809	0.9902|0.9839|0.9625|0.9799|0.9455|0.9355
C28C12.9.1	1373	0.9091
C28D4.2a	255	0.9048
C28D4.3.1	88|718|1035|1061	0.9524|0.9032|0.9118|0.9333
C28G1.3	2286|2434	0.913|0.9231
C28H8.11a.1	867	0.9091
C28H8.12.1	439|441|577|987	0.9231|0.9167|0.9286|0.913
C28H8.12.2	439|574|577|643	0.9512|0.925|0.9508|0.9048
C28H8.3	4064|5404	0.9091|0.9
C28H8.4.2	223|319|345|445|482|484|485|873	0.9412|0.9754|0.9602|0.982|0.9816|0.9857|0.9375|0.9383
C28H8.9a	63|372|375|919|1191|1266|1300|1318	0.92|0.92|0.9221|0.9032|0.9734|0.9|0.929|0.9231
C29A12.1	839	0.913
C29A12.3a	343|1233|1329|1574|1862	0.9167|0.96|0.9213|0.902|0.9333
C29E4.12	108|258|479	0.9259|0.9|0.9318
C29E4.2	953|956|1381	0.9268|0.925|0.9048
C29E4.3a	395|1875|2223|2365|2817	0.9091|0.9355|0.9032|0.913|0.9091
C29E4.4	1197|2178	0.9032|0.9
C29E4.8.2	366|835	0.9|0.92
C29E6.5a	1018|1338|1339|1581	0.9|0.9333|0.9348|0.9394
C29F3.7a	1028	0.9048
C29F4.1	191|325|361|411|414|664	0.9223|0.9643|0.9|0.9828|0.9524|0.9103
C29F5.1	601|1010	0.9434|0.9189
C29F7.2a	355|395|695|1276	0.973|0.9254|0.9273|0.9054
C29F7.3	562	0.9677
C29F7.4a	232|649|705|706|838	0.9211|0.9362|0.9032|0.9412|0.9231
C29F7.5	649|706|838|1262	0.9535|0.9286|0.9375|0.9062
C29F9.7	381|404|512|656|994|1023|1496|1559	0.974|0.9365|0.9439|0.96|0.9326|0.9818|0.9394|0.9265
C29H12.1	1171	0.9259
C29H12.2.1	119|123|492|832|904|1091|1161|1339	0.9038|0.9041|0.9624|0.9457|0.942|0.9742|0.9185|0.904
C30A5.3	90|94|225|382|717|841	0.9516|0.9118|0.9281|0.92|0.9167|0.907
C30B5.1	1877	0.9231
C30B5.2a	78|741	0.9|0.9583
C30B5.4	333	0.9333
C30C11.2.1	135|583|708	0.913|0.9189|0.9412
C30C11.2.2	135|708	0.986|0.9867
C30C11.4.1	208|518|570|1114|2316	0.9278|0.9508|0.9652|0.9178|0.9556
C30C11.4.2	559	0.9231
C30F12.1	1617|1829	0.9048|0.9048
C30F8.2.1	418|1051|1304|1306|1307	0.95|0.9574|0.908|0.9649|0.9835
C30F8.2.2	412|1300|1301	0.9091|0.9048|0.9556
C30F8.4a	558|919	0.913|0.9091
C30H6.7a	13|50|100|209|384	0.9298|0.9688|0.9167|0.9649|0.912
C30H6.9.1	414|495|520|550	0.9231|0.9231|0.9245|0.913
C30H7.2a.1	1720	0.9
C30H7.2a.2	1588	0.9231
C30H7.2b	1679	0.913
C31C9.2	209|569	0.9703|0.9568
C31E10.6	1498	0.9
C31E10.7.1	90|421	0.9259|0.9184
C31H1.6a	282|397|1101|1136	0.95|0.9355|0.9231|0.9091
C31H2.1a	523	0.9167
C31H5.4	9|32|245	0.9394|0.9581|0.9223
C32A3.3a.1	314	0.913
C32B5.14a	94|165|1164	0.9032|0.9333|0.9211
C32B5.16	401|1136	0.9643|0.9091
C32B5.1a	340|413|792|967|1062	0.913|0.9344|0.9118|0.913|0.9048
C32D5.10	1368	0.9231
C32D5.11	176|863|864|952|958|1423|2406|2462|2464	0.913|0.9302|0.9388|0.9091|0.9344|0.931|0.9286|0.9444|0.9032
C32D5.12	249|600|672|816|830|907	0.9032|0.9643|0.9091|0.9362|0.9123|0.9
C32D5.3.2	1336|1464|1605	0.9167|0.9375|0.9091
C32D5.5	142|707|940	0.913|0.9608|0.9342
C32D5.8b	166|269|545|661	0.9444|0.9167|0.9195|0.951
C32D5.9	109|477	0.9076|0.948
C32E12.3	460	0.9
C32E12.5.1	96|253|604|1392|1394	0.9434|0.9|0.9487|0.9608|0.9459
C32E8.11	4947	0.9
C32E8.2a.1	161|274|376|428|614	0.9589|0.9592|0.92|0.9375|0.9403
C32E8.2a.2	161|274|376|428	0.9429|0.9389|0.9589|0.9412
C32E8.3	14|17|20|86|292|400	0.9733|0.9714|0.9512|0.9118|0.9429|0.9138
C32E8.8	440|2689|2691|2692|2696|2717|2765	0.9062|0.9362|0.9487|0.9348|0.9118|0.9661|0.9483
C32E8.9	114	0.9048
C32F10.2	1566|1704|1987|2379|2575|2826|3069	0.9487|0.9|0.9348|0.9048|0.9048|0.9167|0.9574
C32F10.6	1143|1380	0.9024|0.9608
C32H11.4	901	0.9048
C33A11.2	109	0.9
C33A12.1	309|397|450	0.9706|0.9478|0.9865
C33A12.3a	474|936|938	0.931|0.913|0.9545
C33A12.6a	871|983	0.9|0.913
C33B4.3c	3479|3552	0.931|0.913
C33D9.13	433|532|624|660|802	0.9231|0.9412|0.9048|0.9355|0.9057
C33D9.6a	484|1353|1591|1597|2366|2582|2712|2915	0.9189|0.9254|0.9524|0.9375|0.95|0.9412|0.9|0.9231
C33F10.13	417|1121	0.9118|0.9048
C33F10.4	566	0.9
C33F10.5d	2250|3140	0.9091|0.92
C33F10.7a	1012	0.9167
C33G3.3	84|219	0.9286|0.9259
C33G3.4	933|2172	0.9074|0.9038
C33G8.6	236	0.913
C33H5.10	201|228|415	0.95|0.9565|0.9216
C33H5.12a	265|283|493	0.9752|0.9116|0.9838
C33H5.13a	409	0.913
C33H5.15a	44	0.913
C33H5.18a.2	1299|1303	0.9412|0.9062
C33H5.19	373|433	0.9524|0.9091
C33H5.6	455|476	0.9091|0.9394
C33H5.7	250|516|969|971|1201	0.9333|0.9565|0.9385|0.9032|0.9062
C34B2.10	209	0.9091
C34B2.2	469	0.9492
C34B2.5	202|244	0.9545|0.9091
C34B2.6	61|280|2155|2273	0.92|0.9167|0.9189|0.9216
C34B2.7.1	119	0.9
C34B2.8	90|271|573|575	0.9697|0.9339|0.9787|0.9324
C34B7.2	2559	0.9
C34C12.2	395|444|742|871|1318|1680|2093	0.9048|0.9|0.9|0.9|0.9487|0.9333|0.9487
C34C12.5.1	802	0.9091
C34C12.5.2	802	0.9545
C34C12.6	401|487|1043	0.9231|0.9412|0.9111
C34C6.3	1220	0.9091
C34C6.4	250|933	0.9091|0.9048
C34D4.13	268|408	0.931|0.907
C34D4.4	203|259|447	0.9009|0.9412|0.9412
C34E10.10a	479	0.9556
C34E10.2	54|186|516	0.9048|0.9623|0.9556
C34E10.6.1	63|97|529|532|1129|1156|1166|1220|1228|1239|1450|1555|1610|1790	0.9|0.9726|0.9286|0.9091|0.9|0.9677|0.9556|0.932|0.9219|0.9333|0.9333|0.9062|0.9467|0.9231
C34E10.6.2	97|1166|1220|1228|1610	0.9394|0.9|0.9302|0.9286|0.9
C34E10.6.3	63|97|175|232|529|532|653|1126|1129|1156|1166|1220|1228|1239|1392|1450|1555|1610|1770|1810	0.9852|0.9823|0.9551|0.9565|0.9825|0.9574|0.9474|0.9427|0.9787|0.9671|0.9835|0.9617|0.9809|0.9699|0.9535|0.9803|0.913|0.9771|0.9423|0.9733
C34E10.7	93|302|438|555	0.9231|0.9302|0.9062|0.9184
C34E10.8	53|2903|2912|2937|2940	0.9412|0.9|0.9167|0.9189|0.92
C34E11.1	231|841|1446	0.925|0.9|0.9355
C34E7.1a.1	88	0.9
C34E7.4.1	363|412	0.925|0.9362
C34F11.3a	460|622	0.9167|0.931
C34F11.9a	1055	0.9
C34F6.8.1	1017	0.9149
C34F6.9	2583	0.9167
C34G6.4a	1369	0.9231
C34G6.5	559	0.9231
C34G6.6a	404|487|838|902|1382|1385|1508|1951|2239|2242|2288|2635|2664|3036|3218|3496|3540|3584|3605|3667	0.9672|0.9524|0.9231|0.9459|0.9487|0.9167|0.9302|0.9385|0.9048|0.974|0.9846|0.9685|0.9429|0.9512|0.9008|0.9796|0.9067|0.9864|0.9429|0.9724
C34G6.6b	179|181|404|487|838|902|1382|1520|2254|2300|2647|2936|3508|3552|3596|3679	0.913|0.931|0.9483|0.9508|0.92|0.9444|0.9024|0.9048|0.9672|0.9789|0.9659|0.9091|0.9524|0.902|0.9677|0.9551
C34G6.7a.1	604|754|1287|1353	0.9535|0.9535|0.9394|0.9524
C34G6.7a.2	748|1347	0.9444|0.9024
C34H4.4	101|794|795	0.9231|0.9636|0.9286
C35A5.11a	228|367|600	0.9459|0.9231|0.9492
C35A5.2	1116	0.9333
C35A5.8	1307|1439|1716|1920|1938|2437|2440|3150	0.9167|0.9333|0.9048|0.9302|0.9118|0.9062|0.9531|0.9136
C35B1.2a	1298|1374|1442	0.913|0.925|0.9375
C35B1.5	195	0.9062
C35C5.3a	532	0.9155
C35C5.3b	77|541	0.9394|0.9595
C35C5.4a	83|589|841	0.9344|0.9754|0.9221
C35D10.1	489	0.902
C35D10.10	416|841|930	0.9208|0.951|0.9375
C35D10.13	39|158|371|493|600	0.9888|0.9714|0.9394|0.9077|0.9192
C35D10.16	321|334|487	0.934|0.9464|0.9714
C35D10.4	1402	0.9048
C35D10.5	719	0.9286
C35D10.6	608|663	0.9434|0.9375
C35D10.9a.1	1635	0.9592
C35E7.1a	153|653|1309|1579|1728|2171	0.9315|0.967|0.9623|0.9254|0.9396|0.9477
C35E7.3	1164|1202|1309	0.9375|0.9184|0.9032
C35E7.4	1720	0.9
C35E7.5a.1	719|1732|1896|2357|2530|3296|3320|3323|3467|3491|3494|3743|3788	0.92|0.9286|0.9143|0.9259|0.913|0.9298|0.9355|0.9674|0.9524|0.9362|0.961|0.9341|0.9206
C35E7.5a.2	719|1896|2198|2357|2530|2897|2903|2956|3296|3323|3467|3491|3494|3787|3788	0.931|0.9118|0.913|0.9062|0.9574|0.9348|0.9113|0.9231|0.9167|0.9691|0.9565|0.9298|0.9787|0.9138|0.9595
C36A4.3	1379	0.9048
C36A4.4	1033|1667	0.9545|0.9048
C36A4.8b	353|1418	0.9333|0.913
C36A4.9a.1	489|777|1436	0.9091|0.9091|0.9455
C36B1.11	898	0.9153
C36B1.12a.2	1367|2004	0.9268|0.9459
C36B1.12b	636|1125|1367|1968	0.9167|0.9074|0.9324|0.9545
C36B1.3	109|920|926	0.9342|0.9701|0.9315
C36B1.4.1	596|738|819	0.9189|0.9444|0.9286
C36B1.5	528|1035	0.9394|0.9189
C36B1.7	283|432	0.9318|0.975
C36B7.6	560|597|1114|1563|1843|1921|1938|1982	0.9091|0.92|0.95|0.9455|0.9333|0.9259|0.9487|0.9167
C36C9.1	719	0.9
C36E6.1b	1427|1729|1744|1902|1908|2002	0.95|0.913|0.9286|0.925|0.9474|0.9231
C36E6.2	533	0.9231
C36E6.3	944|970|1190	0.9451|0.9375|0.9663
C36E6.5	327|484	0.9681|0.9583
C36E8.1.1	398|1248|1691|1771|1927|2410	0.9032|0.9167|0.92|0.9688|0.9733|0.9538
C36E8.1.2	1898	0.9062
C36E8.3	896|1439	0.9636|0.9286
C36E8.4	1018	0.9048
C36E8.5.1	469|749|774|1178|1181|1346|1457	0.9711|0.9041|0.9189|0.987|0.9091|0.9273|0.9806
C36E8.5.2	255|453|1162|1330|1441	0.9077|0.9143|0.963|0.9194|0.9412
C36E8.5.3	758|1162|1441	0.9196|0.9756|0.9545
C36E8.5.4	453|1162|1165|1330|1441	0.9552|0.9806|0.92|0.9406|0.9577
C36F7.1	55|1225|1837	0.9167|0.92|0.9167
C36F7.4g	1027	0.9032
C37A2.7	356|380	0.9086|0.9512
C37A2.8a	147|318	0.9348|0.9245
C37C3.2a.1	75|339|1157|1569	0.9606|0.9538|0.9091|0.95
C37C3.6a.1	177|438|738|1338|1340|1604|2420|2507|3234|3577|3684|4121|4123|4130|4132|4139|4141|4394|4586|4640|4731|4733	0.9091|0.92|0.9298|0.9211|0.9286|0.9091|0.925|0.9048|0.9464|0.9706|0.9296|0.9333|0.9091|0.9359|0.9583|0.9524|0.9242|0.974|0.9706|0.9538|0.9615|0.9286
C37C3.6a.2	407|2389|3203|3546|3653|3741|4090|4092|4108|4363|4555|4700|4702|4857	0.9231|0.9091|0.931|0.9245|0.9184|0.9362|0.9057|0.925|0.9385|0.9268|0.9565|0.9394|0.931|0.9231
C37C3.6a.3	3488|3595|4034|4043|4050|4305|4497|4642	0.9091|0.9118|0.9091|0.925|0.9091|0.9259|0.9512|0.9
C37C3.8a.1	91|94|145|605|971|1068|1352	0.9048|0.9|0.92|0.9394|0.9048|0.9231|0.9118
C37C3.8c	91|94|213|679|1039|1426	0.913|0.9344|0.9512|0.9535|0.9206|0.9394
C37C3.9	579	0.9302
C37E2.1.1	521	0.9231
C37E2.1.2	464	0.9375
C37E2.4	665|743|752	0.9545|0.9219|0.9286
C37E2.5a.2	458|859|1233|1321	0.9|0.9333|0.9429|0.9444
C37H5.13a	597|1184	0.9048|0.92
C37H5.5.1	39	0.9231
C37H5.5.2	39	0.9259
C37H5.6a	518|562|599	0.9038|0.9167|0.9194
C37H5.6b	345|892|1420	0.9286|0.9574|0.9219
C37H5.8	995|1894|2132|2147	0.913|0.9429|0.9184|0.9302
C38C10.2	688|767|939|1067|1082|1486|1777|1782	0.9091|0.962|0.9041|0.9333|0.9171|0.9107|0.9211|0.9268
C38C10.4	918|1554	0.9091|0.9231
C38C10.5a	3598|3908|4224	0.9091|0.9091|0.9394
C38C10.5b	3926	0.9
C38C3.5a.1	445|647|777|1203|1268	0.9141|0.982|0.9371|0.9283|0.9526
C38C3.5a.2	633|1254	0.9118|0.9155
C38C3.5c	572	0.9068
C38C6.2a	1369|1703|1760|1807|1808|1876|1941	0.9429|0.9143|0.913|0.9048|0.9286|0.9048|0.9286
C38C6.3	323	0.9
C38C6.6	204|617|816|830|1268|1739	0.9016|0.9474|0.9091|0.94|0.9348|0.9535
C38D4.3	2566|2729|3537	0.9375|0.9286|0.9355
C38D4.4	964	0.9
C38D4.5b	594|780|1382	0.913|0.9048|0.9091
C38D4.6a.2	414|417|420|423|733|914|1041|1186	0.972|0.95|0.9455|0.9259|0.931|0.9556|0.9024|0.9048
C39B5.2a	482|688|829|1104	0.9265|0.92|0.9286|0.9032
C39B5.2b	333|574|690|780|921|924	0.9143|0.9625|0.9355|0.9259|0.9326|0.9057
C39E6.1	1728	0.9355
C39E6.4	979	0.9091
C39E9.11	172|557|681|1390	0.9516|0.9057|0.9355|0.9231
C39E9.12	914	0.9322
C39E9.13	76|122|246|988|1027	0.957|0.9155|0.9157|0.9812|0.9623
C39E9.14a.1	277|513|1367	0.9091|0.9394|0.9062
C39E9.14b.1	490|1338	0.9615|0.902
C39F7.4	1017|1026	0.9032|0.9293
C40A11.3	442	0.9231
C40A11.4	110|111|310|431|570|647	0.92|0.9615|0.9322|0.913|0.9583|0.9464
C40A11.6	697|698	0.913|0.9512
C40H1.4	216|556|694	0.92|0.9538|0.9375
C40H1.6	119|122|519	0.931|0.9636|0.9167
C41C4.7a	925|1107	0.9538|0.9091
C41C4.8.1	97|1441|1572|1969|2090|2529	0.9259|0.931|0.9189|0.9286|0.9412|0.9286
C41C4.8.2	23|1065|1367|1895|2445	0.9091|0.9231|0.9464|0.9286|0.9429
C41D11.2	424|714|1423|1431	0.9143|0.9375|0.925|0.9091
C41D11.3c.2	1532|1791	0.9394|0.9091
C41D11.5	598|600|724	0.9091|0.9759|0.907
C41D11.7	1837|1915	0.9231|0.9
C41D11.9	435	0.9091
C41G7.9a.1	54|237|447	0.9286|0.9583|0.939
C41G7.9b	110|113|296|506	0.913|0.9474|0.9756|0.9661
C41H7.3.1	58|124|819|852	0.9118|0.9535|0.9091|0.9074
C41H7.6	268|388|624|895|1048|1051|1075|1089	0.963|0.9017|0.9333|0.9417|0.9016|0.9799|0.9111|0.9118
C41H7.8	611	0.9091
C42C1.10a.2	252|546|888|1015	0.9032|0.9429|0.9|0.9459
C42C1.12	206	0.9464
C42C1.15	736	0.9048
C42C1.8.2	435	0.931
C42D4.6	65|155	0.9|0.9423
C42D4.8	4068	0.9459
C42D8.5a.1	28|326|986|1383|1508|1511|1841|2133|2911|2914	0.9|0.9167|0.9394|0.9|0.9048|0.9091|0.9032|0.9355|0.9643|0.9167
C42D8.5a.2	28|326|986|1508|1511|1841|1961|1995|2911|2914	0.9444|0.9062|0.9111|0.9355|0.931|0.9474|0.9535|0.9231|0.963|0.9394
C42D8.8a	469|1014|1039|1041|1043|1173|1195|1201|2002|2059|2127|2142|2294|2330|2423|2464|2468	0.9344|0.9231|0.9494|0.9723|0.974|0.9565|0.9254|0.9304|0.9774|0.9209|0.9208|0.9726|0.9806|0.9064|0.9483|0.955|0.9272
C42D8.8b	2417	0.9211
C43C3.1.2	1477|1478|2220	0.9032|0.9189|0.9375
C43C3.3	478|1760	0.9|0.9
C43E11.1	1796	0.9608
C43E11.10	271|313|869|1103|1292|1415|1635	0.9429|0.9048|0.9189|0.9|0.9167|0.9211|0.9697
C43E11.11.2	319|342|1957	0.9286|0.92|0.9286
C43E11.2a	485|515	0.9|0.9167
C43E11.3b	3001	0.913
C43E11.4	27|123|126|1164	0.913|0.9412|0.9259|0.9
C43E11.6a.1	141|480|650|711|844|1118|1120|1296|2272	0.931|0.9531|0.9239|0.9|0.9577|0.9153|0.9412|0.9216|0.9375
C43E11.6a.3	558	0.9048
C43E11.6b.2	141|364|638|816|1159|1792	0.9048|0.9|0.9118|0.9118|0.9032|0.9355
C43E11.8	114|1306|1389|1693|1743|1747	0.92|0.9259|0.9286|0.9412|0.9388|0.92
C43E11.9	386|468|654	0.9556|0.906|0.9189
C43F9.8	832	0.9474
C43G2.1a.1	447|1343	0.9048|0.9
C43G2.2a	916	0.9
C43H6.1a	1202|1411	0.9048|0.9286
C43H6.4	483|515|1640	0.9412|0.92|0.9348
C43H6.7	1121	0.9
C43H8.2.1	594|677|1032|1033|1036|1037|1095	0.9091|0.9535|0.9259|0.9556|0.9455|0.9074|0.9091
C44B11.3	477|1254	0.9231|0.9459
C44B12.2a	73|87|130|465|922|946|1054	0.9545|0.9756|0.9786|0.9838|0.906|0.938|0.9231
C44B12.2b.1	883	0.9024
C44B7.1	263|308|495	0.9286|0.9302|0.9
C44B7.10.1	43|120|906|955	0.9091|0.9412|0.9615|0.9268
C44B7.11	2454	0.9
C44B7.12	183	0.9048
C44B9.3	244|437|905|908	0.9608|0.9565|0.95|0.9683
C44C1.1	63|66|209|793|795	0.9315|0.9541|0.9787|0.9423|0.9216
C44C1.2.1	95|361	0.9091|0.9
C44C1.4a	923|1258|1579	0.9032|0.9024|0.92
C44C10.4	194	0.9048
C44C10.8	492|631|640|843	0.913|0.96|0.9661|0.9333
C44C11.1a	439	0.9444
C44C8.6.1	84|532|1398|1487	0.95|0.9487|0.9444|0.9143
C44C8.6.2	325|478|481|1344|1373|1377|1433|1515	0.9211|0.9545|0.9|0.95|0.9412|0.9216|0.9524|0.92
C44E4.3	501	0.913
C44E4.4.1	512	0.931
C44E4.4.2	436|512	0.9318|0.956
C44H4.2	717|1420|1558|2131	0.9474|0.9483|0.9592|0.9048
C44H4.3	203|531|973|980|983|2278	0.9385|0.9583|0.9459|0.9179|0.9355|0.9602
C44H4.4	2330|2333	0.9167|0.9286
C44H4.5	100|103|537|705|1080	0.95|0.9048|0.9167|0.92|0.9167
C44H4.7b.1	1984	0.9091
C45B11.1a	1527	0.9091
C45B11.1b	1523	0.907
C45B11.6	1320	0.9024
C45B2.5	320	0.9
C45B2.7	710|943|1634|1635|2137|2598	0.9394|0.9091|0.9167|0.913|0.9778|0.9
C45E5.6a.1	771|873|1368|1431|1538|1733|1752|1784|1930|2038|2039	0.9286|0.94|0.9079|0.9259|0.931|0.9798|0.9667|0.9524|0.9535|0.974|0.9688
C45G3.1	476|1538|2724|3352|3674	0.9048|0.9|0.9091|0.9394|0.9355
C45G3.5	341|404|1570|1601|1718	0.913|0.9|0.9298|0.9091|0.94
C45G9.2	600|742|914|915|1095	0.9259|0.9412|0.9459|0.9333|0.9615
C45G9.5	135|1130	0.9429|0.931
C46A5.3a	545	0.9091
C46A5.4	1565|1566|2824|3491|4153|4527|4624	0.913|0.913|0.9091|0.9|0.9545|0.9512|0.9048
C46A5.9	289|387|461|1974|2002|2583|2699	0.9429|0.9464|0.9474|0.9186|0.9182|0.9231|0.9565
C46C11.3	466	0.9524
C46C2.2.1	508|522|640|796	0.9565|0.9434|0.9259|0.9189
C46C2.2.2	376|417|430|431|549|705	0.9524|0.9634|0.9024|0.9545|0.9556|0.9054
C46E10.4.1	183|223	0.9184|0.9344
C46F11.2a	1000|1192|1299	0.9412|0.9778|0.9412
C46F11.2b.1	907|1099	0.9|0.9444
C46F11.2b.2	772|1234	0.9091|0.913
C46F11.5a	445|848|1217	0.9286|0.9355|0.9231
C46F4.2.2	293|580|1223	0.9062|0.931|0.9062
C46G7.1	222	0.9394
C46G7.2	603	0.9184
C46H11.11a	2460|3963	0.9048|0.913
C46H11.9	794	0.9464
C46H3.2c.1	1311|1323	0.9167|0.9167
C47B2.3.1	360|906|912|980|1030|1060|1097|1146|1149|1262|1418	0.9041|0.9286|0.9817|0.9365|0.913|0.9487|0.9444|0.9882|0.9733|0.9437|0.9847
C47B2.3.2	604|1150|1156|1224|1274|1304|1341|1390|1393|1449|1506|1662	0.939|0.9141|0.9792|0.9756|0.9354|0.9605|0.9737|0.9952|0.9846|0.9524|0.9329|0.9927
C47B2.3.3	650|718|798|835|884|887|1000|1156	0.9785|0.9559|0.9429|0.9412|0.99|0.9744|0.9383|0.9825
C47B2.4	599|785|864|949|950	0.9661|0.9429|0.9355|0.9531|0.9712
C47B2.5.1	114|288|365|478|524|571|775	0.9254|0.963|0.9259|0.913|0.9318|0.9437|0.951
C47B2.6a	313|314|353	0.9737|0.9605|0.9048
C47C12.3a.1	153|675	0.9|0.9412
C47D12.2	732|979|1127|1406|1467|1488	0.9362|0.95|0.9|0.961|0.9643|0.907
C47D12.6a	1298	0.9
C47D12.6b.1	1668	0.9048
C47E12.1.2	320|387|480|912|1643	0.9438|0.9524|0.967|0.9291|0.9048
C47E12.4c.1	1409	0.9259
C47E12.4c.2	1380	0.9259
C47E12.4c.3	1363	0.9091
C47E12.5a.1	303|643|1736	0.9286|0.9032|0.931
C47E12.8	306|621|756	0.931|0.9429|0.9091
C47E8.4a.1	75|372|665	0.9231|0.9565|0.9342
C47E8.4a.2	32|329|622	0.931|0.9231|0.9688
C47E8.5.1	272|619|1418|1548|1551|1582|1661|1821|2041|2160	0.9|0.9146|0.9588|0.9013|0.9733|0.9323|0.9811|0.9091|0.9355|0.9487
C47E8.5.2	1081|1400|1530|1533|1643|1813|2142	0.9268|0.9529|0.9217|0.9649|0.9771|0.9058|0.9062
C47E8.5.3	1567|1700|1731|1810|1970|1980|2190|2309|2370	0.9018|0.9726|0.9211|0.9818|0.9189|0.9195|0.97|0.9459|0.9028
C47E8.5.4	1425|1535|1915|2034|2095	0.9592|0.9756|0.94|0.931|0.9231
C47E8.7.1	381|385|829|1008|1058|1062|1072|1200|1403|1650|1914|2057|2059	0.9091|0.9091|0.9362|0.9178|0.9327|0.9653|0.9643|0.9412|0.9532|0.9898|0.9444|0.9612|0.9315
C47E8.7.2	1197	0.9286
C47G2.2	842	0.9
C47G2.3	379	0.9167
C47G2.4	692|704	0.9|0.9333
C47G2.5b	299|824|883|1292|1695|1827|1979|2572|2735|2744	0.9302|0.9268|0.9038|0.9167|0.9118|0.913|0.9024|0.913|0.9|0.95
C47G2.5c	2918|2927	0.913|0.9259
C48B4.11	490|574	0.931|0.913
C48B4.3	536	0.913
C48B4.4b	2508|5117	0.9|0.9091
C48B4.7	33	0.9362
C48B6.2	55|191|272|506	0.9412|0.975|0.9634|0.9032
C48B6.3	804|813|1107	0.9149|0.9032|0.9286
C48B6.6a	7521	0.9
C48B6.9	61	0.9259
C48D1.1a	1843	0.9259
C48D1.2a	1554|1573	0.931|0.9
C48E7.1	169|346|395|667|697	0.95|0.9694|0.9437|0.9791|0.9017
C48E7.10	303	0.9355
C48E7.11.1	124|187|467	0.9429|0.9375|0.9189
C49A1.4a	534|630|1323|1462	0.9048|0.9286|0.9394|0.9231
C49A1.4b	419|462|561|1251|1390	0.9091|0.931|0.9231|0.925|0.92
C49C3.15	196|240	0.9091|0.9
C49C3.6	175|389|573|609|692	0.9455|0.9048|0.9157|0.9306|0.9048
C49C3.7	782	0.9615
C49C3.8a	496	0.907
C49F5.1.2	684|959|1459|1684	0.9554|0.9741|0.9682|0.9275
C49F8.3	161|167|170|550|551	0.9533|0.9268|0.9794|0.9043|0.9226
C49H3.10a	2584	0.913
C49H3.11.1	12|53|131|263|628|719	0.948|0.9468|0.9205|0.9909|0.9687|0.9416
C49H3.11.2	257|622|713	0.9649|0.9211|0.9274
C49H3.16.2	248|250	0.9167|0.9
C49H3.3.1	314	0.9239
C49H3.5a	2829|2983	0.913|0.92
C49H3.6a	1449	0.9091
C49H3.8	128|1118	0.9091|0.9091
C49H3.9	1066|1067|1123|1381	0.9664|0.9524|0.9273|0.902
C50B6.2	122|197|518|812|1073|1235|1262|1508|1562|1643	0.9462|0.9886|0.9703|0.9767|0.9871|0.9167|0.9273|0.961|0.9748|0.9136
C50B6.3b	388|641|1020|1031|1032|1122|1829	0.9565|0.9348|0.913|0.9538|0.9138|0.9423|0.9487
C50B8.2	888	0.9545
C50B8.3	299|801	0.9118|0.925
C50B8.4	126	0.9189
C50C3.6	19|294|704|1042|1371|1739|2485|4802|5755|6056|6250|6357	0.9333|0.9143|0.9167|0.9024|0.9444|0.9091|0.9032|0.9615|0.9423|0.9398|0.96|0.9259
C50C3.8	13|15|515|913|1082|1304|1438|1439|1441|1442|1677	0.913|0.902|0.9512|0.9167|0.9423|0.9674|0.9104|0.928|0.984|0.962|0.9146
C50D2.1a	587|1351	0.9091|0.9286
C50D2.5	335	0.9661
C50D2.7	550|1297	0.9|0.913
C50F2.3	174|225|694|1732|1776	0.9032|0.9211|0.9608|0.9474|0.9
C50F4.11	507|1064|1065|1123|1703|1704	0.9512|0.9605|0.942|0.9459|0.9|0.9412
C50F4.13.1	191|378	0.9718|0.9556
C50F4.14b	743|869|918|921|936|1150|1173	0.9787|0.9048|0.9663|0.9355|0.913|0.9375|0.9
C50F4.16	712	0.9091
C50F4.5	129|174|303|476	0.981|0.9146|0.9508|0.9152
C50F4.6	397	0.9623
C50F4.7	415	0.9076
C50F7.4	21	0.9286
C51F7.1a	2274|2729|2771|2959|2961|3094|3095|3252|3269	0.9038|0.9|0.9375|0.9054|0.9625|0.9623|0.9692|0.9318|0.913
C52B11.2.2	547|814|967	0.9459|0.9615|0.9107
C52B9.3a	1519	0.9062
C52B9.4	175|648|1069|1143|1236|1463|1927	0.925|0.9333|0.9286|0.9091|0.902|0.9107|0.9394
C52D10.3b	1249	0.913
C52D10.6.1	177|500|608	0.9565|0.9362|0.9113
C52D10.7	531|582	0.9074|0.9524
C52D10.8	175|498|581	0.9091|0.971|0.9538
C52D10.9	393|396|491|584	0.9174|0.9474|0.9396|0.9485
C52E12.1	906|915|1706|1993|2096|2254	0.9375|0.9259|0.9474|0.9|0.9268|0.9091
C52E12.3.1	242|1101	0.9|0.9048
C52E12.4	3381|3836	0.9|0.9459
C52E2.1	192	0.9062
C52E2.7	658|782	0.9143|0.9167
C52E4.3.1	428|614|717	0.991|0.9709|0.9277
C52E4.3.2	181|367	0.931|0.913
C52E4.4.1	66|154|1237|1350|1513	0.9298|0.92|0.9531|0.9394|0.9
C52E4.6a.1	452|1635	0.9|0.9333
C52E4.6a.2	894	0.9167
C52G5.2	105|591|611	0.9394|0.9487|0.9167
C53A3.2	60|941	0.9621|0.9559
C53A5.1.1	358	0.9206
C53A5.1.2	358	0.9351
C53A5.1.3	350	0.9091
C53A5.17	562|797	0.9091|0.913
C53A5.2	222	0.9062
C53A5.3	1458|1462|1779	0.9178|0.9732|0.9535
C53B4.7a.1	1335	0.9259
C53B4.7b	1262|1278	0.9355|0.9565
C53B4.7d	1476|1492	0.9259|0.913
C53B7.4	334	0.9091
C53C11.3	1353	0.9091
C53D5.1a	480	0.9375
C53D5.2	923|964|1104	0.9167|0.9091|0.9
C53D5.6	124|134|1561|2168|2694|2783|3067|3069|3609|3672	0.9636|0.9091|0.9556|0.9438|0.9259|0.9518|0.9153|0.9367|0.9091|0.9048
C53D6.2.2	1101	0.9615
C53D6.4a	428	0.9189
C53H9.1.1	210|249	0.9603|0.9958
C53H9.1.2	208|247	0.925|0.9649
C53H9.2a	763|1465|1550	0.9123|0.9143|0.9574
C54C6.1.2	40	0.9
C54C6.2	285|976|1943	0.9167|0.95|0.9362
C54D1.5	5503	0.9615
C54E4.2a.1	156	0.954
C54G10.2a	161|534|1582|1649|2055	0.9032|0.9487|0.9111|0.9333|0.9512
C54G10.3a	2096	0.931
C54G10.3b	220|334|1344|2157|2393|2436|2543	0.94|0.9041|0.9149|0.9114|0.9241|0.94|0.9091
C54G4.6	162	0.9062
C54G4.8	201|312|327|753|1230	0.9438|0.9259|0.9143|0.9355|0.9189
C54G4.9	519|779|1151|1153|1402|1403	0.931|0.92|0.9608|0.9388|0.9048|0.9074
C54G7.3b	3309	0.9231
C54H2.3	1253|1746	0.9683|0.9091
C54H2.5.1	108|139|153|267|387|542|1046|1172|1257	0.931|0.9608|0.9077|0.9024|0.9|0.9|0.9444|0.9107|0.9014
C54H2.5.2	1010	0.9048
C55A6.1.1	691	0.92
C55A6.1.2	628	0.9048
C55A6.12a	572	0.9
C55A6.2a	1346	0.9
C55A6.2b	775|778|991|1048|1437|2093	0.9583|0.9429|0.9048|0.9|0.9524|0.9111
C55A6.5	357	0.9286
C55A6.9	552|778|960|1140|1449	0.9681|0.9067|0.963|0.9324|0.954
C55B6.2	388|745|748|767|788|1224|1759|1769|1770	0.939|0.9024|0.9692|0.9639|0.9429|0.9091|0.9175|0.9583|0.9143
C55B7.4a	67|397|688|904|906|1090|1258|1310|1311	0.904|0.9146|0.9297|0.9251|0.9394|0.9854|0.9831|0.9635|0.9697
C55B7.5.1	1042|1438|1546	0.9091|0.92|0.95
C55B7.8	598|599|665|667|834|1113	0.9|0.9375|0.9048|0.9149|0.9355|0.9
C55B7.9a.2	477|1037	0.9394|0.95
C55C3.5a	930|1771	0.9167|0.9333
C56A3.4a	670|808	0.9231|0.9365
C56A3.5.1	101	0.9167
C56A3.5.2	45	0.9286
C56C10.1	1861	0.913
C56C10.10	908|911|927|1146	0.92|0.92|0.9189|0.9091
C56C10.13a	183|210|216|689|1288|1821|2577|2651	0.9412|0.9423|0.9167|0.9344|0.9362|0.9032|0.9412|0.9524
C56C10.3.1	445|500|819|849|953|1044|1124|1332	0.9375|0.9661|0.9831|0.9643|0.9686|0.9884|0.9211|0.9794
C56C10.3.2	401|535|626|914	0.9444|0.963|0.9692|0.9167
C56C10.4.1	472	0.913
C56C10.4.2	472	0.9259
C56C10.8.1	175|388|551|589|630|657|659|754	0.9944|0.9286|0.9545|0.9645|0.9091|0.9868|0.9048|0.975
C56C10.8.2	151|527|565|606|633	0.9876|0.9167|0.9318|0.9219|0.9403
C56C10.9	894	0.9231
C56E6.2.1	132|860|863|977	0.9625|0.9271|0.9577|0.9143
C56E6.3a	2155	0.931
C56G2.15	279|541|601|683|685	0.9231|0.913|0.9048|0.9167|0.9455
C56G2.1b.1	2358|2928	0.9167|0.9259
C56G2.1e	3493	0.9048
C56G2.4	210	0.9048
C56G2.6a.1	617|1009|1012|1312	0.9524|0.95|0.9545|0.9643
C56G2.6b	281|567|673|676|881|976	0.9211|0.9|0.9091|0.9545|0.9231|0.9545
C56G2.7a	91|291|318|412|573|886|1000|1341	0.954|0.9098|0.9655|0.9759|0.9|0.9375|0.9167|0.9259
C56G7.1	570|581	0.9018|0.9604
CC4.3.1	784|926|928	0.9429|0.9259|0.9231
CC4.3.2	784	0.9487
CD4.3.1	270|272|394	0.9429|0.9423|0.9434
CD4.4	242|399|735	0.96|0.9375|0.9
CD4.6	233|546|878	0.9412|0.9259|0.9167
cTel55X.1a	47	0.9099
D1005.1	110|848|1433|2375|2709|3478	0.9|0.9048|0.9|0.9231|0.9091|0.9286
D1005.2	916	0.9032
D1007.12	283	0.9853
D1007.5a	1547	0.9565
D1007.7	1190|1900|1969|2318|3241|3260	0.9268|0.9231|0.9474|0.9038|0.9149|0.9
D1007.8.1	996	0.9167
D1009.2b.1	1518	0.9302
D1014.3.1	408|486|942	0.9649|0.9294|0.931
D1014.3.2	179|257|299	0.9|0.9333|0.9091
D1014.8	965	0.9
D1022.1a	949	0.9111
D1022.4.1	848	0.9355
D1022.4.2	664|682	0.9091|0.9231
D1037.3.1	230|280|483|578	0.981|0.9091|0.9535|0.9375
D1037.3.2	213|466	0.9398|0.9062
D1037.4.1	205|541|680|746|751|978	0.9485|0.9375|0.9636|0.96|0.9565|0.9464
D1037.4.2	648	0.9048
D1043.1	621|2435	0.9048|0.9231
D1044.2a	398|784	0.9259|0.9062
D1044.2c	951	0.9
D1046.1a.2	1485	0.9167
D1046.2.1	250	0.9032
D1053.1	298|655|658	0.9|0.9259|0.9574
D1054.14	44|131	0.913|0.9259
D1054.15a.1	119|225|410|1097|1100|1463	0.925|0.973|0.9508|0.9038|0.9429|0.9714
D1054.15a.2	58|164|349|1036|1037|1039|1402	0.9487|0.9565|0.9375|0.913|0.9189|0.9048|0.9531
D1054.2.1	712|739	0.9194|0.9139
D1054.2.2	692	0.9556
D1054.3a	277|412	0.9516|0.9535
D1069.2a.1	761|792|872	0.9429|0.9787|0.9167
D1081.2	906	0.9733
D1081.7	420|1312|1767	0.913|0.9302|0.913
D1081.8	599|1103|1397|1778|2161|2252|2457	0.9394|0.9452|0.9752|0.9794|0.9664|0.9704|0.9259
D2005.3	110|122|270|476	0.9643|0.9059|0.9032|0.9685
D2005.6	1687	0.931
D2005.7	561	0.9512
D2007.4	238|257	0.9298|0.9
D2007.5.1	841	0.913
D2007.5.2	753|786	0.9091|0.971
D2013.2.1	215	0.9118
D2013.2.2	427|1363	0.9091|0.9
D2013.5	1396|2304|2853	0.9189|0.9|0.9149
D2013.6.1	236|989	0.9348|0.9231
D2013.7	170|238|498|543	0.9606|0.9634|0.9735|0.9737
D2013.9.1	517|1297|1861	0.9091|0.9|0.9167
D2021.1a	1617|3029|3311|3381|3557|3646	0.913|0.931|0.913|0.9434|0.9|0.9048
D2023.2a.1	858|1197|1228|2466|2871|3397	0.92|0.92|0.9048|0.9444|0.9259|0.9444
D2023.6	1247	0.9048
D2024.5a	98|607|643	0.9733|0.913|0.9375
D2024.6.1	39|760|1030	0.9167|0.9298|0.9574
D2024.6.2	983|1030	0.9448|0.9692
D2030.1.1	962|1777|2013	0.9286|0.9091|0.9231
D2030.1.2	1922	0.9091
D2030.11.1	336	0.9394
D2030.5	111|790|793	0.9273|0.9333|0.92
D2030.6	1736|1950|2152	0.9394|0.9556|0.9487
D2030.8.1	793	0.9429
D2045.1a	3372|3479	0.9459|0.9355
D2045.2.1	3791	0.9091
D2045.2.2	3182|4146	0.9167|0.9
D2045.6	403|674|833|902|1691|1894|1896|2201|2302	0.9149|0.962|0.9|0.9661|0.9326|0.9143|0.9091|0.9417|0.9298
D2045.9.2	1026	0.9355
D2063.3a	320	0.9
D2085.1	4750	0.9167
D2085.4	717|789|793|2768|2979|3022	0.9062|0.9355|0.913|0.9412|0.9091|0.9512
D2089.1a	68|172|339|341|1153|1233|1419|1420|1490|1497	0.9057|0.9091|0.962|0.9318|0.9313|0.9636|0.9524|0.9008|0.9559|0.9837
D2089.5	243|1085|1126	0.931|0.9211|0.9
D2089.8	274	0.9167
D2092.2	352|355|589|770|864|955|964	0.9753|0.9286|0.9266|0.959|0.9053|0.9576|0.9694
D2092.4	237	0.913
D2092.5	3556	0.95
D2096.2a	85|418|577|704|706	0.9048|0.9333|0.9845|0.9412|0.9425
D2096.6	57|126|185|402|405|408|621	0.9|0.9423|0.9701|0.9375|0.9487|0.9211|0.9512
D2096.7c.1	346	0.9
D2096.8	194|454	0.95|0.9481
DC2.3a	107	0.9167
DC2.3b	107|754	0.9231|0.9286
DH11.2.2	210	0.913
DY3.1	19|22|182|183	0.9655|0.92|0.9194|0.9048
DY3.2.1	283|495|724|1737|1740|1824|1974	0.9298|0.9583|0.9333|0.9014|0.9571|0.913|0.95
DY3.2.2	625|1052|1350|1685	0.9273|0.9143|0.9348|0.9286
DY3.6	957	0.9032
DY3.7	397|1742|1743|1925|2437|2502|2516|2517|2550|2670|2739|2814|3223	0.9167|0.9018|0.9451|0.9333|0.9149|0.913|0.9032|0.9178|0.9512|0.9271|0.9375|0.9636|0.9429
DY3.8.1	296|356	0.92|0.9135
E01A2.1b	275|278|833	0.9333|0.9|0.9259
E01A2.2a	262|297|801|888|890|1103|1158|1215|1496|1500|1585|1691|1827	0.9592|0.9677|0.9545|0.9437|0.9324|0.9722|0.9355|0.9231|0.957|0.9423|0.9231|0.9556|0.9062
E01A2.4.1	651|1194	0.9091|0.9024
E01A2.6.1	252|408|542|599|733|1066|1085|1183|1185	0.9034|0.9143|0.9792|0.9787|0.9433|0.9342|0.9|0.95|0.963
E01B7.2	399	0.9375
E01G4.1b	1638	0.9048
E01G4.4a	364|1013|1014|1126|1887	0.9259|0.9375|0.9062|0.9091|0.9048
E01G4.5	464|658	0.92|0.931
E02A10.1	24|1385|1386	0.9121|0.9512|0.9508
E02D9.1b	142|145|210|211|264|409|694|742|1046	0.9091|0.9|0.931|0.9299|0.9051|0.9323|0.9667|0.9697|0.9747
E02D9.1c	211	0.9118
E02H1.4.1	664	0.9
E02H1.4.2	140|664|665|678|693	0.9459|0.9423|0.9434|0.9545|0.931
E02H1.5	482|756	0.913|0.9259
E02H1.6	98	0.92
E02H1.8	71	0.9375
E02H4.3b	995|1580	0.9583|0.931
E03A3.2	1997	0.9048
E03H4.10	315|803	0.92|0.9048
E04A4.7.1	836|870|882|995|996|1035	0.9862|0.9843|0.9403|0.973|0.9856|0.9406
E04A4.7.2	217|251|263|376|377|416	0.9714|0.969|0.9444|0.9792|0.9847|0.9162
E04A4.7.3	172|206|218|331|332	0.9688|0.9608|0.9|0.9675|0.9885
E04A4.8	380|549	0.9184|0.9565
E04D5.1a.1	1508|1523	0.9722|0.9114
E04D5.1a.2	1488	0.9167
E04F6.3	267|364|400|494|758|928	0.931|0.9747|0.9048|0.9259|0.95|0.913
E04F6.5a.1	95|123|1203|1395|1524|1941	0.9327|0.92|0.9216|0.9425|0.9765|0.9225
EEED8.1.1	115|353|499|534	0.9355|0.9429|0.9556|0.9091
EEED8.10a	718|721|1081|1576|1809	0.9487|0.96|0.9623|0.963|0.9394
EEED8.12	31|43	0.92|0.9
EEED8.15	772|1133|1137|1204|1216	0.9615|0.96|0.9211|0.9552|0.96
EEED8.2	480|539|672	0.9138|0.931|0.9045
EEED8.3	347|465|630|632	0.9467|0.9535|0.9362|0.9338
EEED8.4	506	0.9118
EEED8.5	1740|2037|2202|2646|3252	0.9|0.9375|0.9565|0.9091|0.9487
EEED8.7a	65|372|550|586	0.9714|0.9291|0.9658|0.9867
EEED8.8	431|1106	0.9|0.9
EEED8.9	156|605|1289	0.9|0.9062|0.9206
EGAP7.1	248|304|307|574|691	0.9029|0.981|0.9672|0.9134|0.9006
F01D4.4.3	1333	0.9091
F01D4.5b.1	530	0.9718
F01D5.6	758|911	0.9048|0.9565
F01E11.1	247	0.9512
F01F1.11	1414|1674|1682	0.9615|0.9074|0.9535
F01F1.12a.1	443|909|1079|1140	0.9717|0.918|0.9396|0.9077
F01F1.12a.2	565|568|964|1034|1204	0.9545|0.9826|0.9|0.9487|0.9443
F01F1.15.1	179	0.9474
F01F1.6.1	309|321|332|796|1214|1675|1920	0.9011|0.9091|0.9211|0.9492|0.9375|0.9208|0.9333
F01F1.7	1040|1084|1180|1388|1568|2107	0.9375|0.9048|0.9455|0.9|0.9333|0.9057
F01F1.8a.1	405|1249|1252|1339|1404|1435|1566|1709|1742	0.9868|0.9563|0.9444|0.9529|0.9123|0.9636|0.9231|0.9706|0.9737
F01F1.8a.2	401|1245|1705	0.9|0.9231|0.913
F01F1.9a	119|155|683|686|1079|1179|1458|1459|1526	0.9535|0.9032|0.9545|0.9535|0.9048|0.95|0.9661|0.9639|0.9365
F01G10.1.1	355|510|513|516|803|875|978|996|1186|1230|1410|1575|1731|1740|1803	0.9259|0.9794|0.9474|0.95|0.9328|0.9615|0.9167|0.9655|0.9167|0.913|0.9592|0.9355|0.9091|0.9412|0.9701
F01G10.1.2	489	0.9286
F01G10.7	716|1131	0.9|0.9259
F01G10.8b	450	0.9048
F01G12.5a.2	3121|3585|3586|4330|4835|4838|5054|5108	0.9048|0.931|0.9286|0.9194|0.918|0.9184|0.9726|0.92
F01G12.5b.2	3124|3870|5057	0.9|0.9032|0.9438
F01G4.1	36|2157|2160|2172|2216|2508|2820|3010|3013|3017|3020|4045|4143|4185|4405	0.9487|0.9459|0.95|0.931|0.902|0.9241|0.963|0.97|0.9565|0.9459|0.9348|0.9|0.9091|0.9388|0.9426
F01G4.2a	329|406|469|597|598|649	0.9655|0.9286|0.9|0.9762|0.9844|0.9
F01G4.5	742	0.9048
F01G4.6a.2	32|120|399|443|455|458|657|814|859|1267	0.9118|0.9027|0.9384|0.9552|0.925|0.9418|0.9773|0.9512|0.9871|0.9009
F01G4.6a.3	120|399|443|657|730|749|859|1179|1267	0.9032|0.9286|0.9362|0.9189|0.9286|0.9048|0.9735|0.9138|0.9227
F01G4.6b.2	1233	0.9286
F02A9.2a	29|31|55|57|58|64|346|593	0.95|0.9616|0.9941|0.9959|0.9087|0.9184|0.989|0.9766
F02A9.4a.1	205|814|996|1783|1784|1851|1962	0.913|0.9333|0.9623|0.9508|0.9412|0.9032|0.9348
F02A9.4a.2	1773	0.9231
F02A9.6	2258|2321|2729|4040	0.9091|0.9167|0.9167|0.9091
F02C12.5	748	0.9
F02E8.1.1	47|314	0.9048|0.9632
F02E8.1.3	291	0.9717
F02E8.3	412	0.931
F02E8.4	1266	0.9
F02E8.5	586	0.9412
F02E9.10c.1	258|675|1224|1377|1380|1397	0.9592|0.9286|0.9231|0.9388|0.9091|0.9074
F02E9.5a.1	198|223|224|311|412|599|646	0.9545|0.9062|0.9032|0.9048|0.931|0.9802|0.9041
F02E9.5a.2	196|221|222|506|597	0.9|0.9048|0.9|0.913|0.9259
F02E9.9b	1836	0.9259
F02G3.1a	333|944|1073|1562|1991|1995|2033|2745|2939|2954	0.9583|0.9608|0.9474|0.9057|0.9636|0.9565|0.9474|0.9107|0.9375|0.9153
F07A11.2a.1	1338|1769|1811|2413|2417|2487	0.9|0.9091|0.9062|0.9636|0.9333|0.9375
F07A11.2a.2	1165|1597|1618|2157|2240|2314	0.9259|0.9|0.925|0.9048|0.9362|0.9231
F07A11.2b.1	1731|2374	0.9|0.913
F07A11.2b.2	2201	0.9
F07A11.3	1018|1427|1844|2040	0.931|0.96|0.9194|0.907
F07A5.1b.1	1484	0.9375
F07A5.3	1439	0.9
F07A5.7a.3	329|624|651|1301|1757|1809|2177|2632|2717	0.9474|0.92|0.9298|0.9726|0.9091|0.9367|0.9|0.9451|0.9508
F07A5.7a.4	624|651|1301|1809|2632|2717	0.9091|0.931|0.9474|0.9355|0.9286|0.9062
F07C6.4e	1729	0.9
F07D10.1	35|570|574	0.9693|0.9272|0.9371
F07E5.5	596|698|702	0.9167|0.9444|0.92
F07F6.4	607|962|1094|1656|1859|1862|2220|2360	0.9615|0.925|0.9206|0.9048|0.9677|0.9524|0.9103|0.902
F07F6.8	226|434	0.9667|0.9634
F07H5.10	193	0.9259
F07H5.13	432	0.9868
F07H5.2	803|1101	0.9048|0.9231
F08B1.1e.2	1443	0.913
F08B12.2	197|947|950	0.92|0.9231|0.913
F08B12.4a	198	0.9048
F08B12.4b.1	198|367	0.9167|0.9048
F08B4.5	564|1442|1477|1529|1723	0.9355|0.9559|0.9231|0.9032|0.9231
F08B4.6	128|1376	0.9|0.913
F08B4.7	146	0.9787
F08B6.3	150|725|821	0.9032|0.9524|0.9545
F08B6.4b	540|613|1255	0.9231|0.9091|0.9038
F08C6.2a	481|898|986|1644	0.9194|0.9032|0.9118|0.913
F08C6.2b	214|631	0.9298|0.9455
F08C6.3	1033	0.913
F08C6.4a	98|356|425|512|529|533|710|713|737|791|835|864	0.9077|0.9487|0.9851|0.9167|0.9868|0.9756|0.9474|0.9725|0.905|0.97|0.9388|0.9027
F08C6.4b	419|523|527|707|829	0.931|0.9589|0.9286|0.9375|0.9167
F08C6.6	139|468|469|615|617|673|709	0.9318|0.9216|0.913|0.9048|0.9167|0.9231|0.92
F08D12.10	115|158|1078	0.9355|0.9268|0.9231
F08F1.5	1071	0.95
F08F1.7	68|440|1254|1688|1826|2258	0.9057|0.95|0.9231|0.9697|0.9091|0.9032
F08F1.8	277|379	0.9808|0.9182
F08F3.2a	707|748	0.9|0.92
F08F3.6	210|634	0.9231|0.9286
F08F8.10a.1	99|752|978|1090	0.9091|0.9|0.96|0.9355
F08F8.2	33|39	0.9|0.9286
F08F8.4	239|395|456	0.9|0.9552|0.9565
F08F8.7.2	86|147	0.9189|0.9189
F08F8.8	238|778|993	0.9118|0.9062|0.9167
F08F8.9a.1	643|1339|1441|1537|1924	0.9483|0.9048|0.9592|0.9592|0.9167
F08G12.1	1766	0.9167
F08G12.10.1	48|688	0.9115|0.9167
F08G12.10.2	48|100|618|688|1105	0.9481|0.9062|0.9016|0.913|0.9062
F08G12.2	336|340|952|1002|1070|1071|1186|1204	0.9211|0.9706|0.9362|0.9692|0.9333|0.9091|0.9434|0.9571
F08G2.4	206	0.9091
F08G5.1a.1	816	0.9286
F09A5.4c.1	1673	0.9
F09A5.4e.1	1668	0.9429
F09B12.1b.1	183|207|237|360|610|1080|1830|1915	0.9211|0.9259|0.95|0.9231|0.9091|0.9524|0.9157|0.9
F09B9.2a	1126|1144|1318|1656|1965|1976|1994|2091|2580|2596|2691	0.931|0.9362|0.954|0.9817|0.9474|0.962|0.9667|0.9273|0.9858|0.9474|0.978
F09B9.3	492|958	0.9362|0.9375
F09C8.2	672|1229|1252|1380|1426|1451|2205|2335|2337|2504|2521|2523|2933|3181	0.9118|0.9318|0.9286|0.9|0.9123|0.931|0.9286|0.9483|0.9231|0.9468|0.9545|0.9556|0.9262|0.9714
F09D1.1	47|541|1214|1427|1430|1581	0.9231|0.9231|0.9429|0.9245|0.95|0.9
F09E10.3	131|185|710	0.9318|0.9302|0.9556
F09E10.6	19|327	0.9355|0.9333
F09E10.8a	757|1192|1330|1581|1902|2232	0.92|0.9091|0.9118|0.925|0.9355|0.9429
F09E5.1	1046|1520|1836|1928|2275	0.9574|0.931|0.9492|0.9595|0.9211
F09E5.11	630|668	0.9747|0.9556
F09E5.13	434|563|730|837|996	0.9524|0.9|0.9057|0.9032|0.931
F09E5.15a.1	219|386|772	0.931|0.94|0.9416
F09E5.15b	833	0.9381
F09E5.15c	159|234|326|712	0.9054|0.9038|0.913|0.9223
F09E5.17	35|174	0.9661|0.9615
F09E5.2	450|984	0.9|0.9459
F09E5.3	210|648|772	0.9032|0.913|0.9487
F09E5.5.1	141|332|748|854|1846|2090	0.9429|0.9429|0.9091|0.9|0.9444|0.9245
F09E5.7.1	273|556|1155|1167	0.9302|0.9111|0.907|0.9355
F09E8.2a	656	0.9259
F09E8.2b	87|311|571|656|816	0.9333|0.9259|0.9512|0.9518|0.9492
F09F7.2a.2	46|71|73|80|82|306|415|594|865|871	0.9604|0.9831|0.9143|0.9146|0.9296|0.9906|0.9772|0.9018|0.9344|0.9333
F09F7.3.1	1639|1670|2261|3274|3421|3423	0.9048|0.9394|0.9167|0.9048|0.9355|0.9286
F09F7.4a.1	464|961	0.9167|0.9091
F09F7.6	154	0.9048
F09F9.2	71|105|595	0.9625|0.9552|0.9592
F09G2.2	161|443|686	0.9756|0.978|0.9577
F09G2.4	1865|2551	0.9|0.9333
F09G2.8a	867|1589|1701	0.9167|0.9474|0.9
F09G2.9	232|433|601|619|622|1189|1372|1493	0.9688|0.9057|0.9111|0.9903|0.9896|0.9057|0.9548|0.914
F09G8.3	623|1067	0.9091|0.9459
F09G8.7	213	0.9
F10B5.1.1	87|174|374	0.9647|0.9609|0.9084
F10B5.1.2	156|356	0.9573|0.9164
F10B5.5	550|727	0.902|0.9623
F10B5.6	24|200|402|872|983|1280|1350|1762|1764|1768|1770|1934	0.9231|0.9032|0.9091|0.9143|0.931|0.9474|0.9394|0.9375|0.9444|0.9512|0.9149|0.9383
F10B5.8	494|1371|1394|1443|1805	0.9|0.9268|0.9091|0.913|0.9286
F10C1.2a.1	147|328|795|807|1738|1766|1785|2086	0.9706|0.9459|0.9636|0.9091|0.9359|0.9048|0.9487|0.9394
F10C1.2a.2	1731	0.9333
F10C1.2b	194|375|842|854|1757|1785|1832	0.9545|0.9091|0.9355|0.9231|0.9231|0.902|0.9444
F10C1.7c	18|68|70|693|1195|1708|1711	0.9074|0.9667|0.925|0.9333|0.9167|0.9434|0.9583
F10C2.2	655|861	0.9535|0.9
F10C2.4	126|944|945|2333|3067	0.9062|0.9|0.9143|0.9149|0.9375
F10C5.1	1034|1162|1552|1940	0.925|0.9167|0.9375|0.9167
F10C5.2.1	112|1053|1513	0.9074|0.9091|0.9057
F10D11.1.1	116	0.9531
F10D11.1.2	101	0.913
F10D11.6a	625|946|1070|1109|1168|1984|2677	0.9048|0.9091|0.9024|0.9474|0.9444|0.9615|0.9286
F10D7.2	46|1091	0.9|0.9091
F10D7.5a	1931|2106	0.9091|0.9
F10E7.4	1126	0.9167
F10E7.5.1	168|218|282	0.9205|0.9057|0.9211
F10E7.5.2	215|279	0.9203|0.98
F10E7.6	195	0.9032
F10E7.7.1	131|140|287|385	0.9032|0.9776|0.9939|0.9015
F10E7.7.2	133|280|375	0.972|0.9612|0.9224
F10E7.7.3	133|186|280|339	0.9565|0.9163|0.9783|0.9259
F10E7.8a	541|1231|2209	0.92|0.9286|0.913
F10E7.9	1125|1687|1904	0.95|0.9167|0.9574
F10E9.11	154	0.9024
F10E9.3	194|434	0.9241|0.9524
F10E9.5	114|637|639	0.96|0.95|0.9107
F10E9.6a.1	2186	0.9
F10E9.6b.1	358	0.9091
F10E9.6b.2	358	0.9167
F10E9.6c.2	725|2258	0.913|0.9048
F10E9.7.2	217|536|635	0.913|0.9118|0.9385
F10F2.1	3115|4875|5262|6295|6331|6772|7622|7624|7731	0.9|0.9231|0.9535|0.9444|0.9|0.9|0.9538|0.9268|0.9444
F10F2.3	108|455|600	0.9062|0.9565|0.931
F10G7.1.1	1651	0.9524
F10G7.2	41|43|757|1027|1555|2452|2790|2846|2944	0.9545|0.9091|0.92|0.9701|0.9091|0.9583|0.9184|0.9273|0.9518
F10G7.3	961	0.9714
F10G7.4	824|1773|1948	0.9167|0.9091|0.9286
F10G7.8.1	423|494|609|803|1250|1342|1436	0.9231|0.9375|0.9524|0.9362|0.9118|0.9231|0.9492
F10G7.8.2	553|912|1286|1380	0.9333|0.9167|0.9259|0.9429
F10G8.3.1	713|909|1134|1516|1693	0.9286|0.9|0.9459|0.9574|0.9211
F10G8.5	11|462|734|867|1083	0.9483|0.92|0.9615|0.9512|0.9796
F10G8.6	464|642|817|819|822|875	0.9074|0.9636|0.9167|0.9451|0.9762|0.931
F10G8.8b	511|1565|1567	0.9091|0.92|0.9048
F11A10.1a.1	2260|3411|3635|4204	0.9|0.9355|0.9048|0.9091
F11A10.1a.2	4194	0.9048
F11A10.1b	746|2562|3280|3393|3395|3619	0.9048|0.9167|0.913|0.92|0.92|0.9091
F11A10.2	218|260|384|425|461|518	0.913|0.9333|0.963|0.9158|0.9701|0.95
F11A10.3a.1	899	0.9
F11A10.3a.2	715|899	0.92|0.9189
F11A10.5	102|415|417|875|912|1072|1115|1339|1631|1635|1802|1836	0.9778|0.9506|0.9277|0.98|0.9524|0.9474|0.9|0.9798|0.9298|0.9709|0.9444|0.9245
F11A10.6a.1	771|1080	0.9032|0.9167
F11A10.7	416	0.9167
F11A10.8.1	87|632	0.9259|0.9574
F11A3.1.1	138|573	0.9231|0.9167
F11A3.2a	156|446	0.9|0.9444
F11A6.1a.2	439|455|1028|1299|2214	0.9268|0.9459|0.9535|0.9512|0.913
F11C1.2	517|625	0.9|0.9216
F11C1.5e.1	2300	0.9
F11C1.6a.1	1751	0.9259
F11C3.3.1	3897|5963|6205|6245	0.92|0.9444|0.9355|0.9048
F11C3.3.3	5225|5872|6114	0.9167|0.9167|0.9048
F11C7.4	5360	0.9091
F11D5.1a	1518|2797	0.9167|0.9375
F11E6.7	17|21|610|613|715|741|989|1051|1182|1405|1437|1609|2275|2724|2725|3146	0.9375|0.9412|0.963|0.9701|0.975|0.9487|0.9512|0.9508|0.9478|0.9367|0.9737|0.9701|0.9636|0.938|0.9365|0.9032
F11E6.8a	1345	0.931
F11E6.9	386|492	0.9|0.9
F11G11.2	42|144|395|539|551	0.9444|0.9785|0.9623|0.9805|0.9231
F11G11.5.2	111|242|246|324|452|477|678|711|903	0.9048|0.9067|0.93|0.9636|0.9125|0.9231|0.9474|0.9778|0.9118
F11G11.7	1550|1958	0.9259|0.9286
F11H8.1.1	913|1192|1193|1386|1560|1563	0.9487|0.925|0.9091|0.9118|0.9459|0.9268
F12E12.1	98	0.9
F12E12.7	479	0.9
F12E12.8	1085	0.9231
F12F6.1	1041|2082|2277|2505|2617	0.9765|0.9459|0.9167|0.9231|0.9032
F12F6.5a	138|140|371|410|411|1008|1072|1149|1268|1773|1833|1836|2175|2355|2400|2778|2948|3020|3480	0.9231|0.9|0.9634|0.9681|0.9474|0.9103|0.9167|0.9487|0.9604|0.92|0.9492|0.9|0.9529|0.9688|0.9636|0.9296|0.9206|0.9508|0.9167
F12F6.5d	1238|2145|2325|2990	0.913|0.9048|0.9259|0.9091
F12F6.6	357|359|656|1185|2295|3035	0.913|0.913|0.9062|0.913|0.9231|0.931
F12F6.7.1	179|316	0.9286|0.9167
F13A7.14	521|795|927	0.9286|0.9259|0.9545
F13B10.1b	870|1246|1895	0.9259|0.9355|0.9091
F13B10.1h.1	441|883|1284|2273	0.92|0.9556|0.913|0.9355
F13B10.2a.1	80|269|603|727|997	0.9577|0.9488|0.9257|0.9941|0.9554
F13B10.2a.2	80|269|603|727|993|997|1227	0.9796|0.9561|0.9098|0.9949|0.9024|0.9746|0.9338
F13B10.2d.2	435	0.9286
F13B12.1	650|828|852|1120	0.9327|0.9091|0.9444|0.9078
F13B12.4a.2	1090	0.9091
F13B12.6	1960|2170	0.9355|0.9
F13B9.1c	2304|2970|3329|3350|3871|3959|4420|4625|4631	0.9091|0.9231|0.913|0.9|0.9|0.9355|0.913|0.9|0.9091
F13B9.6	1066	0.9
F13B9.8b	204	0.9556
F13C5.2	634|1114|1204|1261|1622	0.9559|0.9459|0.932|0.9444|0.9091
F13C5.6a	1049|1376|1380|1556	0.9333|0.9|0.9091|0.9167
F13D11.2b	98|353|721|1283|1915|2210|2424|2645|2898|2915|2970|3342|3825|3989|4065	0.931|0.9|0.913|0.9552|0.9744|0.9091|0.9483|0.9462|0.9333|0.9565|0.9355|0.9487|0.9355|0.9697|0.9643
F13D11.4.1	272|338|419|442	0.9|0.9474|0.9394|0.913
F13D12.2b	560|1010	0.92|0.9457
F13D12.4a.1	762|849	0.9375|0.9535
F13D12.4a.2	130|311|696|755|769|832|842|845	0.9219|0.931|0.9245|0.9402|0.913|0.9|0.9703|0.9259
F13D12.4a.3	711|798	0.9333|0.9362
F13D12.7a.1	442|607|609|775|1484|1488|1626|1640|1688|2079	0.9268|0.9667|0.9231|0.9091|0.9538|0.918|0.9574|0.9375|0.9286|0.9577
F13D12.7a.2	467|632|634|842|1509|1513|1651|1713	0.9524|0.9672|0.9118|0.9423|0.9649|0.9219|0.9643|0.9091
F13D12.7a.3	2019|2274	0.9091|0.9412
F13D12.8	507	0.9091
F13D12.9.3	402	0.9167
F13E6.1	324|341|535|733	0.9785|0.9701|0.9199|0.9459
F13E6.5	26|312|624|1085	0.95|0.9|0.9048|0.9211
F13E9.1	1472|1773	0.913|0.9167
F13E9.11a	334|448|495|567|685|687|779|1246|1257|1559	0.9571|0.9103|0.9559|0.9474|0.9133|0.9576|0.973|0.9524|0.9038|0.9667
F13G11.1b.1	292|740|927|929|1336|1574	0.9167|0.9048|0.9615|0.9434|0.92|0.9062
F13G3.10a	146	0.913
F13G3.11	303|313|448	0.9423|0.9149|0.9143
F13G3.4	351	0.9403
F13G3.5a.2	916	0.95
F13G3.9	168|263|299|422|475	0.9583|0.94|0.9322|0.9231|0.9091
F13H10.2a	801	0.9231
F13H10.5	120|151|671|1301	0.9444|0.9167|0.9091|0.9048
F13H10.6a.2	335	0.9189
F13H10.8a.1	181	0.9762
F13H10.8a.2	162	0.9691
F13H6.1b.1	1409|2836	0.913|0.913
F13H6.3	315|420|1334	0.9444|0.9565|0.9412
F13H8.1b	378	0.9167
F13H8.2	613|1881|2218|2842|3050	0.9048|0.9333|0.9048|0.9091|0.9062
F13H8.7	329|332|971	0.9649|0.9701|0.9211
F14B4.1	84|119|154|157|1387|2229|2231	0.9429|0.9091|0.9388|0.9412|0.9636|0.9375|0.9545
F14B4.2a.1	171|1255|1450	0.9167|0.913|0.9048
F14B4.2a.2	171|1255|1450|1596|1598|1599	0.92|0.9333|0.913|0.9038|0.9048|0.9375
F14B4.3	2375|2537|2753	0.9024|0.9459|0.9
F14B6.3	242	0.9318
F14B8.5b	1874	0.9
F14B8.6	396|848|852	0.9375|0.907|0.9412
F14D12.2.1	1266	0.9118
F14D12.2.2	376|503|1266	0.9697|0.963|0.9505
F14D2.1	42	0.9048
F14D2.12	346|758	0.9231|0.9355
F14D7.2	989|1139	0.9211|0.9091
F14E5.2a	109|389|1534|1866|2203|2405|2719|2881|3787	0.9701|0.9231|0.9355|0.9032|0.9|0.9167|0.9655|0.9677|0.9053
F14E5.2b	2399|2875|3780	0.9091|0.9048|0.9
F14E5.5	91|777|1062	0.95|0.94|0.9091
F14F3.1a	643|1706	0.9048|0.92
F14F3.1c	1244	0.913
F14F3.2	247|982|1826	0.9167|0.9649|0.9138
F14F3.3	802	0.9259
F14F4.3	1292|1957|2321|2928|3009	0.9259|0.9143|0.913|0.9091|0.9231
F14H12.1	476|672	0.9137|0.9506
F14H12.4a	1058|1290|1364|1656	0.9111|0.908|0.9159|0.9608
F14H3.3.2	931	0.9
F14H3.6	200|326|374|516|857|949|1000|1001|1002	0.9583|0.9032|0.911|0.9444|0.9091|0.9504|0.9062|0.9641|0.9231
F14H8.1a	147|148|213|332|419|420|547	0.9048|0.92|0.9412|0.9048|0.9375|0.9412|0.92
F15A4.11	41|52	0.92|0.931
F15B10.1a	439|1064	0.92|0.95
F15B10.2a	2038	0.913
F15B10.3b	113|135|186|312	0.9111|0.9231|0.9714|0.9016
F15B9.1	68|289	0.9565|0.913
F15B9.8.1	194|236|522|587	0.9083|0.9143|0.9074|0.9048
F15C11.2a.1	511|692|860|922|942|1536|1594|1836	0.9244|0.9792|0.9277|0.9638|0.9752|0.9231|0.9204|0.9231
F15C11.2a.2	1558|1620	0.9032|0.9048
F15D3.6	260|415|594	0.9206|0.92|0.9444
F15D3.7	69|204|291|358|672|721	0.9032|0.9231|0.9091|0.9333|0.9091|0.9247
F15D4.2	173	0.9487
F15E6.2b	595|885|888|1206|1214|1218|1341|1343	0.9062|0.9479|0.94|0.9741|0.9468|0.9384|0.9429|0.9643
F15G9.1b	727	0.9474
F16A11.1b	689|2167	0.913|0.9
F16A11.3b	4679	0.9333
F16B12.4	788	0.9444
F16B12.6	1625|2499|3123|3581	0.9355|0.9048|0.9412|0.9048
F16B4.8a	806|1147|1457|1461|1890	0.9091|0.9074|0.9444|0.9118|0.9231
F16B4.8b	1704	0.9062
F16D3.2.1	1216|2380	0.9118|0.9231
F16D3.4	982|3178|3941	0.913|0.9286|0.9512
F17A2.13	441|1013|1058	0.9167|0.9|0.9091
F17A2.5	364|367|515|522|748	0.9636|0.9259|0.9524|0.9592|0.9048
F17A9.2	215|1295|1298	0.902|0.9167|0.92
F17A9.3	224|265|370|737	0.925|0.9487|0.9091|0.9394
F17A9.4	634|770|786|1074	0.9231|0.9429|0.9091|0.9216
F17A9.6	147	0.92
F17C11.10.1	832|2113|2116|2383|2654|2896|3248|3252|3316	0.931|0.9231|0.907|0.9259|0.9434|0.96|0.913|0.9|0.913
F17C11.17a.1	620|1171|1595	0.9143|0.9583|0.9091
F17C11.7a.2	334	0.9
F17C11.8.1	478|1335|1588	0.92|0.9286|0.913
F17C11.9a.1	714	0.9665
F17C11.9a.2	230|670|777	0.9091|0.9708|0.9153
F17C8.4.1	456|651|652	0.9167|0.9167|0.9286
F17C8.9	901	0.9048
F17E5.2	184|252|255|2049	0.9286|0.9231|0.9048|0.9048
F17H10.1.1	246|998|1198|1628	0.9|0.9167|0.9375|0.9048
F18A1.2a	104|205|209|721	0.9|0.9048|0.9286|0.9355
F18A1.2d	260|365|1476|1586	0.9388|0.9153|0.9118|0.9032
F18A1.3a	639	0.9
F18A1.3d	269|313|639	0.9024|0.9118|0.92
F18A1.4a	573|823|1147	0.9259|0.9118|0.9211
F18A1.5	32|34|501|603|987|1244|1347|1419|1422|1749	0.9032|0.9118|0.9028|0.977|0.9496|0.9459|0.962|0.9688|0.9826|0.98
F18A1.7	489|491|494|524|631	0.971|0.9832|0.9725|0.9921|0.9441
F18A11.1.1	200|296|550|939|1236|1723	0.9048|0.9091|0.92|0.9259|0.9167|0.9286
F18A11.1.2	1205	0.9048
F18A11.3	336|339	0.9643|0.9615
F18C5.10.1	316|664|706|1021|1346	0.9524|0.988|0.9346|0.9082|0.9259
F18C5.5	74|87|400|401|540	0.9167|0.9|0.92|0.9394|0.9683
F18E2.2	967	0.9032
F18E2.3	1355|1818|1821|2129|2273|2436|3457	0.9535|0.918|0.9032|0.9286|0.9091|0.9444|0.9167
F18E9.5b	935|1475|2096|2456|3390	0.9091|0.9231|0.9|0.9211|0.9167
F18H3.3a.1	493|498|561|1127|1148|1971|2101|2134|2321|2909|2988|3090	0.9259|0.9333|0.9231|0.9355|0.9211|0.9333|0.968|0.9167|0.9444|0.9286|0.9342|0.9231
F18H3.4	942	0.9062
F19B10.1.2	156|309|797	0.9412|0.9048|0.9118
F19B10.9	81|394|397|986	0.9412|0.9545|0.9167|0.9643
F19B6.1d	1348|1528|1988	0.9474|0.9167|0.9683
F19B6.2a.1	388|646	0.9216|0.9167
F19B6.2a.2	482	0.9211
F19C6.2a	1786	0.9167
F19C6.5	936	0.9412
F19C7.1	127|539|886	0.9|0.9615|0.9118
F19F10.10	511|1911|2496	0.931|0.9231|0.9286
F19F10.12	730	0.9333
F19F10.9	1905|1908|2145	0.92|0.9545|0.9623
F19H8.1a	2783|2921	0.9048|0.9167
F19H8.3	1437	0.9
F19H8.4	2716	0.9259
F20A1.9	1137|1215	0.9048|0.9286
F20B10.1	3064|3117|3492	0.9062|0.913|0.9118
F20B6.2	245|877|986|1089|1290|1292|1316	0.9495|0.9286|0.9671|0.977|0.9804|0.9485|0.9423
F20B6.8b	2381|3020	0.9032|0.9
F20C5.6	172|276|473|670|964	0.9412|0.945|0.9406|0.9417|0.9052
F20D1.1	471|494|499|511|545|546|547|646	0.974|0.9362|0.9507|0.9381|0.957|0.9205|0.9221|0.95
F20D1.2	1730	0.9091
F20D1.3	835|933|1010|1424|1488	0.9375|0.913|0.9231|0.9375|0.908
F20D1.6	2070|2091|2092|2568	0.9474|0.925|0.9302|0.9
F20D1.9	254|552	0.9444|0.9149
F20D12.12	88|91	0.9|0.931
F20D12.4.1	1661	0.9333
F20D12.4.3	426|1558|1846|1849	0.9355|0.9623|0.9444|0.9394
F20D12.5.2	237	0.9333
F20D6.11	1539|1679	0.9259|0.9348
F20D6.4a	663	0.9167
F20G2.2	344|438	0.9535|0.9318
F20G4.1	4165	0.9167
F20G4.3	4139|4902|6040|6279	0.913|0.931|0.9032|0.931
F20H11.1	365|543	0.9259|0.913
F20H11.3	958	0.9455
F21A10.2b	1433|3392	0.9048|0.9032
F21C10.10.1	478|535|721|862|913|936	0.9259|0.9636|0.9741|0.9012|0.9583|0.9643
F21C10.10.2	275|299|461|602|676	0.9231|0.9048|0.9512|0.9143|0.9091
F21C10.7	7287	0.9048
F21C3.3.1	334	0.9263
F21C3.4a	721	0.9
F21C3.5	430	0.9149
F21D12.1c.1	513	0.9
F21D5.1	335|1131|1138|1217|1330|1879	0.9333|0.9091|0.9302|0.9|0.9259|0.9583
F21D5.2b	476	0.9286
F21D5.2c	476|599	0.9048|0.92
F21D5.6	462	0.9333
F21D5.7	262|602|797|1544	0.9091|0.9545|0.9167|0.918
F21D5.8	247|359	0.9254|0.9444
F21F3.6	433|494|700|704|803	0.9286|0.9|0.9661|0.9|0.9718
F21F3.7	38|283|487|576	0.9388|0.9167|0.9|0.931
F21F8.3.1	155|750|1176	0.9167|0.931|0.9474
F21F8.7	62|588|734|802|806|892|944|945	0.9524|0.9167|0.9333|0.9385|0.9643|0.9|0.9259|0.9153
F21H11.2a	8629|8748	0.9231|0.9259
F21H11.3.2	1060|1240|1243|1690	0.9024|0.963|0.9167|0.913
F21H12.1	585	0.9194
F21H12.6	2816|2975|3105|3480|3889|4095|4275|4276	0.9459|0.9375|0.9|0.9091|0.9302|0.96|0.9556|0.9444
F22A3.7	416	0.9545
F22B5.1	204	0.9167
F22B5.10	695	0.9322
F22B5.2a	242|472	0.9268|0.9219
F22B5.3	57|135|148|222|396|668|861|863|894|1113|1198|1250	0.9037|0.913|0.9048|0.9907|0.9671|0.9014|0.9815|0.9789|0.9789|0.9785|0.9671|0.9597
F22B5.7	456|707|3018|3743|4173	0.9118|0.9|0.9231|0.9024|0.9016
F22B5.9	248|1101|1176|1177|1227|1358|1795	0.9118|0.931|0.9189|0.9|0.913|0.9359|0.9048
F22B7.10	1458	0.9
F22B7.13	926	0.9259
F22B7.9	487	0.9362
F22B8.6a.1	1234	0.9
F22B8.7.1	862|998	0.9184|0.9394
F22D3.1c.2	1975|2129	0.92|0.9091
F22D3.1d.2	2062|2216|2330	0.913|0.9286|0.9091
F22D3.1p	2034	0.9048
F22D3.2g	1631|1795|1810|2133|2658	0.9636|0.9118|0.9375|0.9302|0.9016
F22D3.2i.1	784	0.9048
F22D6.2	8|107|253|601|604	0.9096|0.9|0.9703|0.9784|0.9823
F22D6.3a	64|96|178|208|517|681|781|1004|1261|1638|1720	0.9111|0.9565|0.9259|0.9062|0.9423|0.9|0.9459|0.9259|0.9298|0.9231|0.9259
F22D6.4.1	460	0.9146
F22D6.6	1317	0.9
F22E12.2	512	0.963
F22E12.4a.1	923	0.9091
F22E5.20	186|373	0.9333|0.9231
F22F1.1	63|565|638	0.9133|0.948|0.9548
F22F4.1	633|711|899	0.9032|0.9143|0.96
F22F4.2	81|232|922|1033|1139|1142|1264|1563|1622	0.9231|0.9517|0.9756|0.9492|0.9206|0.9481|0.9583|0.9412|0.9927
F22F7.1a	662|984|1135|1197	0.9231|0.9|0.9048|0.913
F23A7.4.1	180	0.9048
F23A7.4.2	213	0.957
F23A7.8	89|97	0.9487|0.9573
F23B12.5.1	327|752|840|1131|1335|1657	0.9048|0.9362|0.9048|0.9286|0.9324|0.9681
F23B12.8a.2	214|1134|2215|2825	0.9|0.9|0.9048|0.913
F23B12.8b.2	2476	0.9
F23B2.13a	18|20|268	0.9268|0.9315|0.9
F23B2.6	208|213|363|459|555	0.9719|0.9104|0.9767|0.9375|0.9401
F23C8.4.1	339|657	0.9167|0.9355
F23C8.4.2	600|657	0.9091|0.9483
F23C8.5a.1	733|1010	0.9672|0.9394
F23C8.6	364|666	0.9565|0.9322
F23C8.9	188|689	0.9062|0.9355
F23D12.5	284|1206|1592|2441|2478	0.9355|0.92|0.9|0.9091|0.9211
F23F1.1a.2	72	0.9487
F23F1.5	213|473|601	0.9474|0.9375|0.9568
F23F1.8a	466|586|1062|1184	0.9512|0.9012|0.9|0.9348
F23F1.8b	361|481|1079	0.9524|0.9327|0.9492
F23F1.9	116|1216	0.9048|0.9333
F23F12.6.1	17|20|124|211|364	0.9655|0.9649|0.9394|0.902|0.913
F23F12.9a	52|104|490	0.931|0.9259|0.9487
F23H11.1	503|506|575|753|771|864	0.942|0.9778|0.9663|0.9817|0.9333|0.9114
F23H11.3.1	302|608|620|623|842|1005|1078	0.9043|0.9583|0.9211|0.9322|0.9032|0.9375|0.9048
F23H11.3.2	588	0.9091
F23H11.9a	74|363|630|643	0.9259|0.9048|0.9048|0.9091
F23H11.9b.1	74|373	0.9259|0.9032
F23H12.2	52|193|623	0.9828|0.9333|0.9362
F23H12.4a	24|77|104|347|410|581|672|712|713|767|955|1007|1049	0.9118|0.9173|0.9769|0.9068|0.934|0.9593|0.91|0.9204|0.9521|0.926|0.9034|0.936|0.9
F23H12.4b	487|488|538|541|542|771|775|782	0.949|0.9587|0.917|0.9091|0.9502|0.9183|0.9147|0.9512
F23H12.5	1117	0.9
F25B3.1	521|749|905|2867|2965	0.9167|0.9231|0.92|0.9048|0.9048
F25B3.6	67|388|902|1241|1243|1586|1837|1852|1894|1967|2028	0.9327|0.9032|0.9277|0.913|0.9211|0.9259|0.9727|0.9508|0.9701|0.9351|0.9259
F25B4.2	431|1377	0.9062|0.9688
F25B4.4	87	0.913
F25B4.5	493|813|852|956|1474|2093|2154|2199|2303	0.9|0.9318|0.9|0.9333|0.9091|0.9596|0.9583|0.931|0.9667
F25B4.6	172|1246|1365	0.9167|0.925|0.9
F25B4.7.2	73	0.9091
F25B5.3b	59|193|997|1026|1107|1235|1322	0.9286|0.9444|0.9091|0.9167|0.9388|0.9111|0.9143
F25B5.4a.1	467|548|615|695|1004|1084|2372|2600|2775	0.9444|0.9467|0.9124|0.9758|0.9759|0.9167|0.9577|0.9593|0.913
F25B5.4a.2	289|517|826|2194|2422	0.94|0.9492|0.92|0.9231|0.9118
F25B5.5	73	0.9
F25B5.6a	2149	0.9048
F25B5.6b	1833	0.92
F25B5.6c.1	1831	0.9091
F25B5.7a	233|937|1137|1228	0.9062|0.9388|0.9655|0.9302
F25D1.1a	511|778|882|1771	0.92|0.942|0.9242|0.92
F25D7.1.1	263|474	0.982|0.9494
F25D7.1.2	245|456	0.9231|0.9
F25D7.2.1	617|839|851|854|856	0.9535|0.9091|0.9231|0.963|0.918
F25D7.3b	3177	0.902
F25E2.4	1276|1277|1279|1398|1402	0.9|0.9333|0.9512|0.9355|0.913
F25E2.5f	2525	0.913
F25E5.1	1508|1785|3088	0.9091|0.9|0.913
F25F2.2	10258|12072|12612|13324	0.9|0.913|0.9583|0.925
F25G6.8	83|191	0.9412|0.9455
F25H2.10	103|568|708|723|730|867|870|873|903|906|909	0.9898|0.9417|0.9375|0.9288|0.9749|0.9877|0.9988|0.9984|0.9944|0.997|0.974
F25H2.11	174|456	0.9091|0.9
F25H2.12a	662	0.9
F25H2.4	193	0.9286
F25H2.5.1	275|276|408|410|590|629	0.9293|0.9091|0.9057|0.9677|0.9851|0.9512
F25H2.5.2	275|410|590|629	0.9385|0.9014|0.9873|0.9697
F25H2.5.3	232|365|367|547|586	0.9279|0.9153|0.939|0.9896|0.9483
F25H2.5.4	235|236|368|370|550|589	0.96|0.9153|0.9091|0.96|0.9881|0.9388
F25H2.6.1	748	0.9
F25H2.8.1	56|94|868|1002|1035|1086|1098|1187|1196|1254|1429|1432|1435|1602	0.9029|0.9429|0.95|0.9688|0.9375|0.9375|0.9677|0.9862|0.9091|0.9231|0.9286|0.9794|0.9608|0.9333
F25H2.8.2	1000|1033|1185	0.9286|0.9167|0.9167
F25H2.9	47|152|155|746|748|823|826|832	0.931|0.9286|0.9592|0.9643|0.9286|0.9167|0.9574|0.9048
F25H5.1b	2698	0.9
F25H5.1i	3056	0.9167
F25H5.3a	1176|1383|1453|1805|1881|1948	0.9048|0.9143|0.907|0.9487|0.9512|0.94
F25H5.4a.1	408|483|602|855|1158|1256|1514|1637|2147|2276|2418|2578	0.9014|0.918|0.9412|0.9343|0.9508|0.9176|0.9643|0.9459|0.9437|0.9076|0.9789|0.9615
F25H5.4a.2	408|483|602|855|1158|1256|1514|1637|2147|2276|2418|2578|2685	0.9314|0.9516|0.9254|0.935|0.9441|0.9255|0.9748|0.9086|0.9651|0.9249|0.9831|0.9667|0.9146
F25H5.4a.3	483|855|1158|1514|1637|2147|2276|2418|2578	0.9683|0.9301|0.9306|0.982|0.9353|0.9457|0.9|0.9837|0.9688
F25H5.4b.1	85|1467|1590|1642|2100|2229|2371|2531	0.9032|0.9565|0.9149|0.9109|0.9643|0.9326|0.9623|0.9333
F25H5.4b.3	777|1178|1436|2198|2340|2500	0.9107|0.925|0.931|0.9231|0.9429|0.92
F25H5.4b.4	1436|1501|2069|2340|2500	0.9118|0.9259|0.92|0.931|0.9
F25H5.4b.5	1131|1389|2022|2293	0.9333|0.9|0.9091|0.9231
F25H5.5a	1304|2271|2389	0.92|0.9091|0.9189
F25H5.6.1	321	0.9459
F25H8.2	1184|1209	0.9|0.9
F25H8.6	69|192	0.9048|0.9091
F25H9.4	1151	0.9375
F25H9.5a.1	1506|1508	0.9|0.9091
F25H9.7a	452	0.931
F26A1.1	544|664	0.9412|0.9074
F26A10.2	2494	0.92
F26A3.1	1011	0.9118
F26A3.7	26	0.931
F26B1.2a	337|404|621|696|1492	0.9048|0.9231|0.931|0.9194|0.9571
F26B1.2c.1	213|297|364|1322|1452	0.9|0.9|0.9107|0.9091|0.9623
F26B1.3	8|497|958|975|1112|1293	0.9565|0.96|0.931|0.9167|0.9355|0.9268
F26D10.12a	157|267	0.9412|0.9167
F26D10.3.1	381|502|553|914|1284|1352|1374|1784|1816|1817	0.9556|0.989|0.9781|0.9781|0.9067|0.9061|0.9186|0.9379|0.9472|0.9269
F26D10.3.2	381|502|553|872|914|1374|1784|1816|1817	0.9512|0.982|0.99|0.9429|0.9886|0.9268|0.9128|0.953|0.9239
F26D10.9a	320|323|619|1191|1808|1820|1824|1825	0.9894|0.9375|0.9038|0.9457|0.9375|0.9006|0.9323|0.915
F26D11.11b	86|1534|1666|1729|2131|2197|2330|2547	0.9242|0.94|0.9091|0.92|0.9184|0.9596|0.9706|0.9259
F26D11.1a	159	0.9
F26E4.1	39|670|689|693|1043|1637|1751|1819|1973|2065|2381	0.931|0.9167|0.9259|0.9057|0.95|0.9205|0.9565|0.9565|0.9744|0.9231|0.9
F26E4.11	1289|1430|1432	0.9556|0.9524|0.9231
F26E4.12.1	247|248|372	0.9286|0.9608|0.9077
F26E4.3.1	548|990	0.9574|0.9024
F26E4.4	413|643	0.9167|0.9444
F26E4.6	84|108|132|135|269	0.9026|0.9874|0.9355|0.9512|0.9919
F26E4.8a	263|384|464|649|837|840|892|1161|1388	0.9509|0.9855|0.9672|0.9657|0.9432|0.9874|0.9148|0.9894|0.9512
F26E4.8b	265|386|466|522|525|651|839|842|894|1163|1390|1418	0.9404|0.9752|0.9813|0.9107|0.9052|0.9868|0.972|0.9934|0.9595|0.976|0.9112|0.9333
F26E4.9.1	130|243|292|476	0.9726|0.963|0.9478|0.9477
F26E4.9.2	262|446	0.9589|0.9811
F26E4.9.3	360	0.9032
F26F12.3a.1	441|511|546|665|1311|1312|1685|1863|2339|2340|2875|2963|3339	0.9074|0.9375|0.9296|0.9189|0.9|0.9219|0.9394|0.9434|0.9091|0.9231|0.9167|0.9|0.9714
F26F12.3b.1	2634|3400	0.9091|0.9
F26F12.4	652	0.9375
F26F12.7	741|1231|1580|1714|3535|3638|4196|4641|5127|5424|5427	0.9459|0.9429|0.9167|0.9048|0.963|0.9583|0.9583|0.9149|0.9467|0.9362|0.9688
F26F2.8	73	0.9259
F26F4.1.1	354|754|1054|1127	0.9296|0.9259|0.9043|0.9062
F26F4.10a.1	965|1067	0.9062|0.9429
F26F4.11	232|324|338	0.9124|0.9608|0.9322
F26F4.12	221|640|745	0.9|0.913|0.92
F26F4.4.2	629|728|1464	0.9032|0.9048|0.9091
F26F4.5.1	1470	0.9048
F26F4.6	567|794|935	0.902|0.9333|0.9231
F26G1.5	93|184	0.9286|0.9048
F26G5.1b	1007|1240	0.9167|0.9259
F26G5.9	39|628|816|915|1015|1299|1705|1707|1833|1975|2626|2647|2650|2652|3178	0.9302|0.9189|0.98|0.9558|0.9375|0.9632|0.9606|0.91|0.9048|0.9531|0.9381|0.9809|0.9574|0.902|0.9294
F26H11.2b	4236|4349	0.9333|0.9167
F26H11.2f.1	1170|1326|1702	0.9796|0.9758|0.9741
F26H11.2f.2	1170|1232|1326|1610|1702	0.9519|0.9459|0.9749|0.9242|0.9712
F26H11.2i	2938|3711|3880|4011|4213|4215|4347|4349	0.9167|0.9048|0.9167|0.9091|0.9259|0.9231|0.9828|0.971
F26H11.2j.1	1274	0.92
F26H11.2k	4353|4355	0.9773|0.9615
F26H11.6	403	0.9259
F26H9.1a	1381	0.9167
F26H9.2	164|606|726|804|1027|1033|1036|1258|1636	0.9143|0.9512|0.9074|0.9032|0.9623|0.9231|0.9286|0.94|0.9216
F26H9.5	68|71|288|290|606|647	0.9753|0.9737|0.9663|0.9048|0.925|0.9737
F26H9.6	455|621|667|669|670|870|872|900	0.9753|0.9556|0.963|0.9394|0.907|0.9701|0.94|0.9355
F27C1.2a	59|641|653|793	0.95|0.9516|0.913|0.9635
F27C1.2b	59|653|805	0.9048|0.9474|0.961
F27C1.6.1	800|1117|1375	0.9167|0.9|0.9167
F27C8.6.2	66|137|336|338|521|523|830|923|943|945|1000|1002|1105	0.96|0.9535|0.9111|0.9592|0.9519|0.9273|0.9699|0.9451|0.9213|0.9474|0.9474|0.9403|0.9455
F27D4.1	175|258|286|382|387|721|940|994	0.9765|0.9837|0.9531|0.9437|0.9796|0.9167|0.9412|0.9237
F27D4.2a.2	376|877|1039|1404	0.9355|0.9259|0.9412|0.9231
F27D4.2b.1	373|832|868|1030|1033|1143|1395	0.9545|0.9|0.9355|0.9512|0.9048|0.9143|0.9032
F27D4.2b.2	376|835|871|1033|1036|1398	0.9184|0.9211|0.9259|0.9583|0.9091|0.9211
F27D4.4a	198|1153	0.9189|0.9333
F27D4.5	356|575	0.92|0.9143
F27D9.1a	577|1401|1583|2211|2401	0.913|0.9375|0.9091|0.9024|0.9048
F27D9.5.1	77|605|755|1194|1593|1619|2138|2336	0.9104|0.9365|0.9722|0.9333|0.9091|0.9333|0.9825|0.9048
F27E11.3	195|1375|1460	0.9231|0.9024|0.9221
F27E5.2	890	0.9286
F27E5.4	390|533|544|745	0.9167|0.9091|0.9643|0.9286
F28A10.6	275|323|382|397	0.9286|0.9048|0.9091|0.9286
F28B12.3.1	293|1060|1360	0.95|0.9608|0.9615
F28B3.10	535|553	0.9|0.9231
F28B3.4b	4892|5210|5348	0.9592|0.9429|0.9286
F28B3.7a	38|521|525|660|1005|1089|3244|3549|3903	0.913|0.9062|0.9231|0.92|0.9459|0.9231|0.9048|0.9556|0.9016
F28B3.8	763|2707	0.9333|0.9429
F28B4.2a	972|1228	0.9048|0.9091
F28C1.3c	866|3046|3537	0.913|0.92|0.9167
F28C6.1	884|1623|1627	0.9231|0.95|0.9211
F28C6.3.1	990	0.9231
F28C6.3.2	990|1212	0.9556|0.9032
F28C6.5	484	0.9
F28C6.6.1	357|512|717|1000|1220|1797|1963	0.9483|0.9429|0.9211|0.9333|0.9423|0.9535|0.9545
F28C6.7a	104|106|264|308|317|392	0.9091|0.9706|0.9853|0.913|0.9211|0.9583
F28D1.11	68	0.9091
F28D1.2	529	0.9
F28D1.7a.1	125|214|290|403|404	0.9524|0.9734|0.9213|0.9022|0.907
F28D1.7a.2	110|199|275	0.9429|0.9512|0.9194
F28D1.9	939|2192|2425|2428|2458	0.9167|0.9506|0.9649|0.92|0.9444
F28D9.1.1	1072|1474	0.9|0.9302
F28F5.3b	1026|1540|1655|1664|1843|2084|2996	0.92|0.9048|0.9111|0.9231|0.913|0.9667|0.9483
F28F8.5a	299|681	0.9636|0.9048
F28F8.5b	298	0.9048
F28F8.6.1	176	0.9048
F28F8.6.2	123|283|332|605	0.9535|0.9091|0.92|0.9259
F28F9.1	383|897|1744|1877	0.9118|0.9167|0.9459|0.9375
F28H1.1	401|785|1127	0.9268|0.9167|0.931
F28H1.2	174|562|603	0.9474|0.9074|0.9343
F28H1.3.1	1783|2316|2474|2881	0.913|0.9|0.9048|0.9
F28H1.3.2	2304|2967	0.9091|0.9091
F28H6.1a	1564|1817	0.9|0.9048
F28H6.4	1089|2724|3133	0.9167|0.9|0.9286
F29A7.1a	690	0.9
F29B9.10	298	0.9
F29B9.11.1	146	0.9184
F29B9.11.2	362	0.9375
F29B9.2b	785|1064|1301|1328|1903|2573|2957	0.9444|0.9062|0.9091|0.9459|0.9355|0.9062|0.9
F29B9.6.1	246|470|1020	0.9038|0.9167|0.942
[truncated: 3,972 more rows]

## Sheet: L1_5mC
Table S9 List of putative RNA modification sites identified with long reads.
Isoform	5mC site	5mC fraction
AC3.2	128|932|1102|1296	0.9394|0.9167|0.9259|0.9545
AC3.5a.1	244|409|458|589|670|672|1443|1447|1530|1621|1623|2102|2609|2630|3163|3286	0.9062|0.9231|0.9429|0.9211|0.9512|0.9062|0.9062|0.9455|0.9118|0.9048|0.95|0.9412|0.9|0.973|0.95|0.9184
AC3.8	240	0.931
AC7.2a.1	321|1347|1644|1751|1836|2236	0.9048|0.9412|0.9355|0.9048|0.92|0.9167
AH6.5	1751|1790	0.9286|0.913
B0001.1a	161|629	0.9048|0.9444
B0001.4a	409|946|962	0.9355|0.913|0.9167
B0001.6.1	411|463|902|1451|1697	0.9231|0.913|0.9286|0.9167|0.9647
B0001.6.2	268|1554	0.92|0.9333
B0019.1	394|640|937	0.9|0.9048|0.9091
B0024.10	137|848|1515	0.9091|0.9048|0.9048
B0024.14a	2581	0.9
B0024.14b	411|1999|2203|2881	0.913|0.9048|0.9048|0.9091
B0024.9a.1	49|402	0.9355|0.9138
B0024.9a.2	21|374	0.9|0.9286
B0024.9b.1	49|402|433	0.9412|0.9649|0.9565
B0024.9b.2	374	0.9167
B0025.2.1	163|537|539|1479	0.9355|0.925|0.9|0.9
B0034.3a	27|107|644|825|826|1000|1154|1286|1749|1885|1947|2375|2381|2383|2579|2742|2744|3032|3039|3138|3182|3195|3218|3266|3302|3421	0.9048|0.9537|0.9565|0.9487|0.9091|0.9615|0.9573|0.95|0.9231|0.9571|0.9394|0.9496|0.9588|0.9688|0.96|0.9206|0.912|0.9404|0.9333|0.9351|0.9582|0.939|0.9231|0.9195|0.9412|0.9324
B0034.3b	731	0.9429
B0034.3c	627	0.9048
B0035.11	493|829|1363	0.9455|0.9231|0.9412
B0035.13.2	207|305	0.913|0.9375
B0035.14a.1	1349|1393	0.9048|0.9
B0035.1b	116|231|417|633	0.9048|0.9643|0.9091|0.9057
B0035.4a.1	120|122|124|137|170|264|267	0.9388|0.9697|0.9744|0.973|0.9048|0.982|0.9524
B0035.5	333|1641	0.9434|0.9524
B0041.2d	1450|1707|2123|2525|2737|2803	0.9091|0.9355|0.9048|0.9091|0.9048|0.9189
B0041.4	73|104|194|331|333|446|489|522|961|963|1022	0.9328|0.9294|0.9931|0.9747|0.9932|0.9934|0.9259|0.9941|0.9468|0.9824|0.9524
B0041.8.1	740	0.9091
B0205.11	39|216|380|571|876	0.9589|0.9583|0.978|0.9535|0.9184
B0205.12	146	0.9048
B0205.3.1	48|824	0.9355|0.9091
B0205.6	807	0.9
B0205.7	77|228|331|492|494|525|1218|1255	0.918|0.9018|0.9|0.9688|0.9524|0.9394|0.9344|0.9634
B0213.15a	511|692|1456|1460	0.9375|0.9535|0.9494|0.9259
B0213.16	872	0.9
B0213.17	62|66|68|194	0.9162|0.9012|0.9806|0.913
B0218.1.1	631|1315|1501	0.9487|0.9286|0.9423
B0218.2	296|590|680|1092|1174|1355|1415	0.9394|0.9429|0.9032|0.9556|0.9111|0.9412|0.9091
B0218.8	501|597|642	0.9062|0.9444|0.9365
B0222.5	945	0.913
B0222.6	71|305|319|323|851|908	0.9024|0.9302|0.9506|0.945|0.9444|0.9661
B0222.8	85|307|321|322|325|853|910	0.9283|0.9262|0.9577|0.9002|0.9388|0.9753|0.9796
B0228.1	256|453|596|597	0.9394|0.9143|0.913|0.9062
B0228.7.2	183|267|482|617|754	0.9592|0.9167|0.9194|0.9474|0.9403
B0238.1	1304|1403	0.9211|0.9318
B0238.10.1	183|284	0.92|0.9231
B0238.11	417|643|758|919|921	0.9455|0.9231|0.9231|0.92|0.9167
B0240.4	1164|1482|1609	0.9|0.9375|0.9375
B0244.2	387|424|596|713|724|732|818|1208|1370|1826|1830|2004|2014|2018|2053|2198|2391|2436|2472|2473|2476|2480|2484	0.9333|0.9347|0.96|0.9724|0.9298|0.9091|0.9054|0.9241|0.9135|0.973|0.9592|0.9084|0.9095|0.9159|0.9308|0.9615|0.9643|0.9571|0.902|0.9557|0.9755|0.9091|0.9333
B0244.8	1101	0.92
B0250.1	73|123|189|257|395|402|420|445|454|515|723	0.9226|0.9391|0.9375|0.9321|0.9916|0.9783|0.9547|0.9158|0.9598|0.9911|0.9401
B0250.5	324	0.9048
B0252.4b	421	0.9048
B0252.8	277	0.9412
B0261.4a	322|558|560	0.9286|0.9032|0.9143
B0261.7	526|777	0.9355|0.9259
B0261.8	518	0.9091
B0272.3	126|524|741|778|1033	0.9333|0.9|0.9014|0.9189|0.9091
B0280.1a	167|635|1095	0.9048|0.92|0.9231
B0280.3.1	177|326|409|455|573|603|701|702	0.9709|0.9048|0.96|0.9167|0.9545|0.95|0.9231|0.9
B0280.3.2	140|372	0.9091|0.9
B0280.5	138|171|648|784|819|1113|1339|1407|1441|1453|1455|1509|1527|1530|1568	0.9032|0.9245|0.9362|0.9464|0.9118|0.9487|0.9561|0.9123|0.9355|0.9787|0.9444|0.9545|0.94|0.9722|0.9167
B0281.3	289	0.9
B0286.3	1077|1307|1309	0.9167|0.9403|0.925
B0286.4a.1	922|1425|1747	0.9375|0.9512|0.9333
B0294.1	326|414|468	0.9|0.9298|0.9231
B0303.15	355|538	0.9524|0.9444
B0303.3.1	187|237|637|680|706|938|1094|1303	0.9286|0.9048|0.9|0.9259|0.925|0.931|0.9556|0.9259
B0303.3.2	266|660|686	0.9259|0.92|0.9412
B0303.9	1494	0.9091
B0310.5a	670|1293	0.9|0.9048
B0334.1.1	285|315|318|325|441|444|495|498|549	0.9247|0.949|0.9618|0.9851|0.9012|0.9708|0.9427|0.9208|0.9693
B0334.1.2	292	0.9032
B0334.11b	824|1018|1028	0.9|0.913|0.9167
B0334.2b.1	978	0.931
B0334.3a.1	99|237|238|802|942|1362|1386|1761|1926|2056|2058	0.9524|0.9138|0.9167|0.9762|0.907|0.9579|0.956|0.95|0.9222|0.9333|0.913
B0334.4	110	0.9
B0334.5	432|823	0.9|0.9091
B0336.10.1	391|405|426	0.9503|0.9817|0.9873
B0336.10.2	389|403|424	0.9492|0.9883|0.963
B0336.10.3	389|403|424	0.9355|0.9863|0.9771
B0336.11b	599|1053	0.9333|0.9118
B0336.2.1	529|638|648|650|1001|1004	0.9286|0.9462|0.9423|0.91|0.9615|0.9565
B0336.2.3	467|532	0.9231|0.9
B0336.6.1	259|559	0.9333|0.9091
B0336.8	59|245	0.9375|0.931
B0348.6a.1	720|881	0.9|0.9048
B0350.2a	100|190|352|353|360|489|526|634|687|739|991|1174	0.9071|0.9104|0.9189|0.9254|0.9565|0.902|0.9468|0.9247|0.9294|0.9322|0.956|0.9048
B0353.1b	1224	0.913
B0361.2a	87|344	0.913|0.9048
B0361.3.1	1157	0.9048
B0361.5a	468|747|868|1310	0.9333|0.9394|0.9231|0.9
B0361.8	619|621	0.9231|0.9167
B0361.9a	79|210|213|435|867	0.9302|0.9527|0.9482|0.915|0.9691
B0365.1	305|584|1846|1996|2716|3154|3252|3385	0.9032|0.9259|0.913|0.9143|0.9091|0.9231|0.925|0.9118
B0365.3.2	668|670|724|796|1193|1343|1385|1440|1481|1720|2065|2125|2137|2161|2164|2234|2485|2518|2576|2654|2657|2753|3222	0.9621|0.9535|0.902|0.9697|0.9318|0.9|0.9468|0.9545|0.9091|0.9167|0.9583|0.9524|0.9792|0.9483|0.96|0.9324|0.9636|0.9459|0.9451|0.9079|0.9133|0.9883|0.9048
B0379.1a	138|155|477|479|494|689|699	0.9487|0.9189|0.92|0.9348|0.9362|0.9286|0.9333
B0379.4a	199|1155|1766	0.913|0.9167|0.9231
B0393.1.1	209|273|309|312|499|648	0.9749|0.9337|0.9822|0.9035|0.9369|0.9491
B0393.1.2	177|241|277|467|616	0.973|0.9388|0.9714|0.9095|0.9423
B0393.2.1	234|385|949|953|968	0.913|0.9|0.9091|0.9167|0.9048
B0393.3	1850	0.9
B0395.3.1	1760	0.9167
B0403.4	479|481|530|645|1032|1179|1394	0.98|0.9583|0.9|0.913|0.9206|0.9208|0.9091
B0410.3	411|458|534	0.908|0.9226|0.9524
B0412.2	639|1629	0.9|0.9048
B0412.3a.1	1232|1301|2648	0.9|0.92|0.92
B0412.4	141|172|208	0.9847|0.9211|0.9079
B0414.3	213|570|662|747	0.931|0.9444|0.9286|0.9545
B0414.7a	2670|3173|4142	0.9|0.92|0.9
B0416.5a	867|1847	0.9589|0.9138
B0432.14a	139	0.913
B0432.2	535|571|572|646	0.975|0.9184|0.9333|0.913
B0432.3	335|467	0.9143|0.9787
B0432.4.1	751|902	0.9508|0.9412
B0457.2	397|838	0.9355|0.9394
B0457.6	496	0.9333
B0464.1.1	327|493|515|517|712|951|1118|1175	0.9024|0.931|0.9375|0.9074|0.9|0.9333|0.9692|0.9048
B0464.3	142|201|241|259	0.9659|0.9072|0.9718|0.96
B0464.4a.1	1136	0.913
B0464.5c.1	2890	0.9
B0464.5d.1	976|2790	0.9259|0.9286
B0464.6.2	1814	0.9
B0491.2.1	147|237|277|316|409|597|598	0.9545|0.9241|0.942|0.98|0.95|0.95|0.9583
B0491.5.1	1058|1127|1201	0.9|0.9|0.9
B0495.7.1	1738|2587	0.9091|0.9
B0495.9	59	0.925
B0507.2	84|524|527|801|985|1179|1297|1396	0.9189|0.9048|0.9324|0.9167|0.92|0.9437|0.9444|0.931
B0511.12a	5879	0.9
B0511.6	218|245|370|377|384|421|984|1058|1303|1305|1314|1358|1603	0.9922|0.9697|0.9671|0.9608|0.9695|0.9043|0.9024|0.978|0.9043|0.9804|0.962|0.9592|0.9025
B0513.2a.2	305|463	0.9062|0.9286
B0513.3a	22|191	0.9076|0.9319
B0513.4a	163	0.9194
B0513.5a	720	0.9
B0513.9a	325	0.9487
B0546.1.1	212|326	0.9458|0.9809
B0546.1.2	205|319	0.9184|0.9565
B0546.4a	37|230|436|610	0.9016|0.9681|0.94|0.9011
B0547.1	182|648|676|687|759	0.9333|0.9|0.9286|0.9167|0.9412
B0554.5	1025	0.9286
B0563.4	305|395|439|974|1021	0.9259|0.9205|0.9661|0.9342|0.9683
B0564.2a	489	0.9
B0564.3.1	518|778|782|1045|1133	0.9667|0.9278|0.9487|0.9291|0.9016
C01A2.2a	195	0.9
C01A2.4	167|203|204|257|317|412|566|568	0.9|0.9412|0.9483|0.9|0.9429|0.9167|0.9524|0.9286
C01A2.5	206|306|717|930|1080	0.9091|0.9375|0.9091|0.9091|0.9355
C01B10.11	289	0.9111
C01B10.3	1048|1049	0.9091|0.9167
C01B10.5a	412|487	0.9286|0.9
C01B10.5c	134|203	0.9355|0.92
C01B10.6a.1	392|412|415|516|518|558|876|1089|1165|1220|1308	0.9365|0.9355|0.9167|0.9643|0.9259|0.9574|0.9143|0.9|0.9636|0.9615|0.925
C01B10.8.1	1037|1294|1915|1993|2030	0.913|0.9259|0.9|0.9091|0.9
C01B10.9	777|1810	0.931|0.9286
C01B12.1	489|619|718|744	0.92|0.9474|0.9636|0.9167
C01B12.2	991|994	0.9211|0.9355
C01C10.2a	465	0.9459
C01C10.4	428	0.9032
C01C4.3a.1	892	0.9091
C01C7.1b	2983	0.9
C01F1.6	171|748|1017|1347	0.92|0.913|0.9|0.9412
C01F6.1	1029	0.9
C01F6.5	53	0.9444
C01F6.6a	315|556|1414|1476|1812	0.9091|0.9048|0.9048|0.9|0.9
C01F6.8a	151	0.913
C01F6.9a	94|97|161|170|220|289	0.9118|0.954|0.9103|0.9375|0.956|0.9459
C01G10.11a.1	1129|1442	0.9412|0.9535
C01G10.6	188	0.9091
C01G10.8.2	290|690|959|1166|1169	0.9143|0.9048|0.9362|0.9032|0.9079
C01G10.9.1	777	0.9
C01G5.25	212	0.9091
C01G5.6	129|299|358|432|539|1011	0.9302|0.9048|0.9259|0.92|0.907|0.9091
C01G6.1a.1	101|239|240|912|949	0.9545|0.9091|0.9429|0.9298|0.9091
C01G6.1a.2	225|897|1031	0.9|0.9048|0.9149
C01G6.1a.3	897	0.931
C01G6.1b.1	86|101|240|450|940|1074|1113|1184	0.92|0.9714|0.914|0.9512|0.9673|0.9024|0.902|0.927
C01G6.1b.2	86|925	0.9231|0.9474
C01G6.4	853	0.913
C01G6.5	122|430|1006|1047|1182|1536|1809|2172|2256|3135	0.931|0.9062|0.9259|0.9394|0.9362|0.9474|0.9344|0.9024|0.9048|0.9268
C01G6.7	596	0.9048
C01G8.3	782	0.95
C01G8.5a	301|477|573|726|1430|1583|2028|2095|2225	0.9464|0.9048|0.9419|0.9118|0.92|0.9726|0.9643|0.9394|0.9143
C01G8.5b	267|1369|1549|1994|2061	0.931|0.9259|0.96|0.9091|0.9091
C01H6.7a.2	1291	0.9259
C02A12.4	162|318|774|787	0.9378|0.9077|0.9661|0.9104
C02B10.1.1	269|396|572|1392	0.9048|0.92|0.9286|0.9167
C02B10.3	998	0.9
C02B10.4	779	0.9123
C02B10.5a.1	755|2394|2396	0.9|0.9355|0.9048
C02B4.4	330	0.9231
C02C6.3b	76	0.9048
C02C6.3d.1	76	0.9048
C02D5.4	102|153|303|331|466|636|859	0.9592|0.9573|0.9412|0.9091|0.9394|0.9792|0.9474
C02E11.1a	1191|1727|2838|2930|3326|3449	0.92|0.9|0.92|0.9|0.92|0.9355
C02F12.3.1	64|394|589	0.9718|0.9351|0.9444
C02F12.3.2	29|359|503	0.95|0.9432|0.9231
C02F12.5	189|379	0.913|0.913
C02F4.4	632	0.9048
C02F5.14	157|465	0.9286|0.9048
C02F5.3	266|269|297|371|373|404|494|723|724|779|989|1039	0.9828|0.9636|0.9375|0.9787|0.9184|0.95|0.9388|0.9559|0.9416|0.9583|0.9149|0.9306
C02F5.4	417|505|991	0.9|0.931|0.9
C02F5.7b.1	797|1340|1678	0.9|0.9444|0.9
C02F5.7b.2	657|733|735|1731|1773|2111	0.95|0.95|0.9057|0.9167|0.9403|0.9394
C02F5.9	677|723|725	0.9184|0.9167|0.9231
C03A3.2	1169|1404	0.9259|0.92
C03B1.12	21|60|817|869|1023	0.9211|0.9667|0.9358|0.9227|0.9655
C03B8.4	6532	0.92
C03C10.1.1	1490	0.931
C03C10.1.2	58|252|987|1340|1491|1572|1704	0.9048|0.9524|0.9167|0.9091|0.9208|0.9328|0.9737
C03C10.4	81|127|235|369|466	0.9167|0.9492|0.9556|0.9368|0.9556
C03D6.8	103|183|281|380	0.9259|0.932|0.9071|0.9489
C03E10.4	468|1485|1487	0.9231|0.9167|0.9286
C03F11.3.1	248	0.92
C03G5.1	71|468|588|829|914|1317|1377|1666|1697|2121	0.931|0.9231|0.9444|0.9091|0.9231|0.9429|0.9661|0.9167|0.9231|0.9524
C03G5.7.1	92|272|380|385	0.9138|0.9419|0.9362|0.9079
C03G5.7.2	65|353	0.9381|0.9692
C03G6.15	728|772|775|1154|1311|1372|1373	0.9138|0.9412|0.9619|0.9189|0.9552|0.9224|0.9638
C03G6.17	714	0.9048
C03G6.19	900|1047|1161|1169	0.9091|0.9355|0.9091|0.9268
C03G6.5	237|387|552|821	0.9615|0.9496|0.9508|0.9118
C03H5.2	146|368|542|549|606	0.9016|0.9118|0.9545|0.9011|0.9079
C04A2.3e	3035|3037|3184|3446	0.9|0.9|0.9091|0.9
C04A2.7a.1	1195	0.9091
C04C11.2.1	430|1269|1814|2151	0.9355|0.92|0.9048|0.9167
C04C3.3	176|302|747|1034|1039|1047	0.9487|0.92|0.9535|0.9048|0.902|0.9091
C04E12.4	45|412|546|750|1434|1591|1660|1720	0.9091|0.9333|0.9286|0.9286|0.9355|0.9286|0.9375|0.9318
C04E6.13	302	0.9194
C04E6.7	1010	0.9286
C04F12.10	22|221|654|1296|1312	0.9333|0.9615|0.9661|0.9661|0.9512
C04F12.4.1	256|257	0.9662|0.9699
C04F12.4.2	244|245	0.9605|0.968
C04F12.7	372	0.9048
C04F12.8	346|590|677|713	0.9231|0.92|0.913|0.9048
C04F6.1	1831|3349|3545|3618	0.9048|0.913|0.9048|0.9167
C04F6.3	600|1260	0.913|0.9
C04F6.4a.1	1600	0.9333
C04G2.4	173	0.913
C04G6.3	4122|4463	0.9167|0.92
C04G6.4	860|886|1301	0.9032|0.9375|0.9062
C04H5.8a	96|156	0.9831|0.9189
C05B10.1b	354|428|466|669|671|1562|1626	0.9259|0.9167|0.9444|0.9143|0.9286|0.9091|0.9
C05B5.8	459|505|530	0.9355|0.9444|0.9
C05C10.3	43|439|782|1294|1493	0.9231|0.9362|0.9143|0.9286|0.95
C05C10.4.1	1043	0.9286
C05C10.4.2	396|681|1010|1043	0.9231|0.9375|0.92|0.9444
C05C10.4.3	842|1043|1206	0.9231|0.9048|0.9
C05C10.6b	1108|1593	0.9|0.9
C05C12.4	541|670|926	0.9469|0.9577|0.9457
C05C8.2	687|1021	0.9032|0.9
C05C8.3.1	275|356|357|636|742	0.9048|0.902|0.9455|0.9302|0.9355
C05C8.4	2708	0.9048
C05C8.5	553	0.913
C05C8.7.1	1644	0.9048
C05D10.1a	181|425|453|544	0.9|0.913|0.9333|0.9231
C05D11.1	622|1175|1635|1637|1955|2064|2334|2357|2748|2761	0.9048|0.9444|0.9091|0.9048|0.9423|0.9394|0.9583|0.9286|0.9444|0.9595
C05D11.10	193|248|310	0.9|0.931|0.9157
C05D11.11b.1	1196|1287	0.931|0.9
C05D11.11b.2	656|813|1041	0.92|0.9412|0.9062
C05D11.12.1	889|1272	0.9231|0.92
C05D11.3	255|352|778	0.913|0.9091|0.9268
C05D11.7a.1	540	0.9048
C05D11.9	1883	0.9167
C05D12.7	442	0.9091
C05D2.10a	1085	0.92
C05D2.1a.1	2470	0.913
C05D2.8	712|871|1185	0.9|0.9189|0.9535
C05E11.1a	475	0.9091
C05E11.5	1392|1395	0.9231|0.9375
C05E11.8a	225|228	0.994|0.92
C05E4.9a.1	124|442|635|696|749|758|790|823|1046|1048|1094|1378|1453|1498|1593|1622|1732|1836|1880|1883|2071|2146|2147|2216|2291|2578|2850|3106	0.9429|0.9487|0.9459|0.9721|0.9268|0.9474|0.96|0.9132|0.9744|0.9636|0.9691|0.9722|0.957|0.9689|0.913|0.9915|0.9211|0.9795|0.9793|0.9609|0.9541|0.918|0.9461|0.9231|0.9512|0.9306|0.9922|0.9328
C05E4.9a.2	124|442|635|696|748|749|758|767|790|823|1046|1048|1094|1300|1447|1453|1498|1622|1732|1836|1880|1883|2071|2146|2147|2208|2216|2291|2578|2850|3106	0.9412|0.9508|0.9583|0.9689|0.9744|0.931|0.9756|0.9231|0.9651|0.9145|0.9725|0.9762|0.9632|0.9286|0.9|0.983|0.9769|0.9908|0.9167|0.9889|0.991|0.9526|0.9634|0.9135|0.9654|0.9286|0.9412|0.9713|0.9508|0.99|0.9515
C05E7.1	617|801|864	0.9375|0.9375|0.9429
C05E7.3	200	0.913
C05G5.4.1	390|566|725	0.9062|0.9412|0.9535
C05G5.4.2	566|725	0.9318|0.9661
C06A1.1	110|384|663|1167|1247|1282|1515|1741|1945|1962|1990|2419|2421|2615	0.9762|0.9701|0.9062|0.9615|0.918|0.9577|0.9022|0.96|0.9016|0.973|0.9643|0.9655|0.9621|0.9385
C06A1.2a.1	70	0.9592
C06A1.5	365|405|478	0.9577|0.9036|0.9423
C06A5.7a.2	888	0.9118
C06A6.3.1	71	0.9333
C06A6.4a.1	759|810|949|1239	0.9429|0.9091|0.95|0.9333
C06A6.5	824|893|1228	0.913|0.9444|0.9
C06A8.1a.1	510|1322|2243	0.913|0.9|0.9259
C06A8.1a.2	53|653|1654|2129|2243	0.9118|0.9355|0.9167|0.9464|0.9535
C06A8.1b.1	2402	0.9
C06A8.1b.2	2288|2402	0.9394|0.92
C06A8.2	596|1081	0.9048|0.931
C06A8.3	350|383|474|477	0.9588|0.9091|0.9394|0.992
C06B3.4	328|514|691|772|773	0.9167|0.9286|0.9118|0.9184|0.9
C06B3.6.1	437|609|672|821	0.9|0.9186|0.9107|0.945
C06B3.6.2	275|323	0.92|0.9062
C06B8.8.1	195	0.9885
C06B8.8.2	182	0.9896
C06B8.8.3	182	0.9946
C06B8.8.4	182	0.9854
C06B8.8.5	182	0.9885
C06B8.8.6	182	0.9877
C06B8.8.7	182	0.9892
C06E1.9	1400	0.9459
C06E4.3	285|830	0.913|0.9
C06E7.1a	36|233|348|351|485|1371|1386|1403	0.9231|0.9474|0.913|0.9333|0.9167|0.9559|0.9032|0.9231
C06E7.3a.1	41|45|265|380|383|596|858|1392	0.9355|0.925|0.9286|0.9048|0.9259|0.9|0.9259|0.9118
C06E8.3d	476|849|1771	0.913|0.931|0.913
C06G1.4	2006|2854	0.9375|0.913
C06G3.11	214	0.9706
C06G3.2	1303	0.913
C06G3.3	58|185	0.9399|0.9104
C06G3.5a	86|92|142|426|508|919|1119|1317	0.9674|0.9074|0.9684|0.9455|0.9143|0.9286|0.9423|0.9589
C06G3.6	556|727|882|1561	0.9048|0.92|0.9048|0.913
C06G3.9.1	2151	0.931
C06G8.1	1275	0.913
C06H2.1.1	130|172|175|386|461|602|620|631|633|635	0.9364|0.9692|0.9888|0.917|0.9608|0.9196|0.9291|0.9671|0.9703|0.9459
C06H2.1.2	130|172|175|386|461|491|602|620|631|633|635|636	0.9618|0.9706|0.9887|0.9236|0.9831|0.9091|0.9614|0.968|0.9702|0.9682|0.9231|0.925
C06H2.6a	246|417|420|503	0.913|0.918|0.9412|0.9355
C06H5.7.1	500|1230|1316|1336|1339	0.9556|0.92|0.9219|0.9672|0.9444
C07A12.4a.1	363|716|747|1595|1772|1791|1870	0.9402|0.913|0.9394|0.9762|0.906|0.9904|0.9124
C07A12.7a.1	47|128|414|619|682|732|769|828|1259|1350|1353	0.9286|0.92|0.96|0.92|0.9286|0.9189|0.9545|0.9091|0.925|0.9189|0.9062
C07A9.3a	590|608|915|2279	0.9091|0.9167|0.9|0.931
C07A9.7a	1454	0.913
C07B5.5	733|1112	0.9565|0.9012
C07D10.2a.1	541	0.9
C07D10.2b.1	747	0.913
C07D10.5	476	0.913
C07D8.6	41|206|318|408|546|849|1012|1085	0.9048|0.9|0.9429|0.9286|0.9286|0.9375|0.9024|0.9024
C07G1.3a	1420|1473	0.9|0.9
C07G1.5.1	643|1833|1888|2468	0.9|0.92|0.9091|0.9
C07G1.8	103	0.9429
C07G2.1a	69|374|960|1266	0.9|0.9016|0.9259|0.962
C07G2.2a	1749|1869|1970|2063	0.9259|0.9355|0.9394|0.9348
C07G2.2b	1878|1979	0.9|0.9032
C07G2.2c.1	73|1901|2122	0.931|0.9394|0.913
C07G2.2c.2	2096	0.9048
C07G2.3a.2	18|131|291|301|392|539|593|739|823|1057|1094|1160|1191|1424|1560|1774|1852|1854	0.9237|0.9203|0.9579|0.9643|0.964|0.9037|0.9636|0.9805|0.9412|0.9009|0.9651|0.9091|0.9293|0.9452|0.9435|0.9397|0.9675|0.9625
C07G3.2	42|272	0.9062|0.913
C07H6.4	2427	0.931
C07H6.5	447|1037|1288|1364|1503|1515|1691|1767|1829	0.9333|0.9231|0.9167|0.9667|0.9|0.9608|0.913|0.9574|0.9
C08A9.1	298|646	0.9588|0.9143
C08A9.10	73|384	0.9231|0.9545
C08B11.1.1	152|189|240|812|979|1368|2492|2713	0.92|0.9167|0.9|0.9459|0.9231|0.9459|0.9184|0.9167
C08B11.3a	2119|3292|3646	0.9091|0.9091|0.9
C08B11.5	842	0.9286
C08B11.7.2	218|363|591|645	0.9|0.9167|0.9412|0.913
C08B6.10	665|671|704	0.9492|0.9259|0.931
C08B6.1a	632|821|825|1154	0.9|0.9|0.92|0.9355
C08B6.8a	48|438|439	0.9091|0.92|0.9444
C08B6.9	840	0.92
C08E3.13.1	223	0.9091
C08E8.4	498|837|845	0.9216|0.9545|0.9545
C08F11.11.1	69	0.9677
C08F11.11.2	73	0.9565
C08F11.11.3	72	0.9079
C08F11.12	64|109|331	0.9487|0.9355|0.9545
C08F11.13a.1	469|482|1208	0.9|0.9474|0.9355
C08F8.1a	63|238|244|249|394	0.9412|0.9604|0.9259|0.9247|0.9444
C08G5.4a	714	0.9
C08H9.2a	218|721|1344|1832|2013|2016|2548|3378|3778|3941|4019	0.9608|0.9394|0.9231|0.9753|0.9355|0.9815|0.9231|0.9375|0.9053|0.9691|0.9194
C09B8.6a	709|831|839|878	0.94|0.9429|0.903|0.9265
C09C7.1	115|400|487|778	0.913|0.95|0.9259|0.925
C09D4.2	815|896	0.9429|0.9286
C09D4.5.1	588|620|697	0.9438|0.9176|0.9387
C09D4.5.2	515|547|624	0.9344|0.9215|0.9384
C09D4.5.3	152|522|554|631	0.902|0.9373|0.9243|0.9589
C09D4.5.4	508|540|617	0.949|0.9193|0.9272
C09E8.1a	1773	0.9048
C09F12.1.2	82	0.9048
C09F5.1a	589|747|1027|1071|1732	0.9091|0.92|0.9189|0.925|0.9444
C09G4.2b.2	259|766|1495|1498|1541|1566|1656	0.96|0.9535|0.9286|0.9459|0.9423|0.9318|0.9615
C09G4.3	356|589	0.9|0.9
C09G5.4	116|907|910|969|1032	0.9032|0.9783|0.9286|0.9806|0.9048
C09G5.5	693|986|987	0.9869|0.9605|0.9571
C09G9.1a	669|909|1209|1210	0.9|0.9091|0.9024|0.92
C09G9.1b	218|260|667|894	0.9286|0.9048|0.9|0.913
C09G9.6	1174	0.9
C09H10.2.1	56|249|272|302	0.9396|0.9983|0.9859|0.9031
C09H10.2.2	56|152|249|272	0.9403|0.9014|0.9987|0.9804
C09H10.3	534|596|729|745|783|1071|1095|1165|1193|1337|1343|1435	0.9538|0.9167|0.9663|0.9459|0.9012|0.95|0.96|0.9401|0.9085|0.9369|0.9465|0.9437
C09H10.6	268|272|686	0.9048|0.92|0.9231
C09H6.1b	3459	0.9
C10B5.3	135|634	0.9375|0.925
C10C5.7	143|334	0.9259|0.9
C10C6.2	1102	0.9048
C10C6.6	2748|2750|2937|3191|3489	0.913|0.92|0.931|0.9231|0.9574
C10E2.6	1775	0.9048
C10F3.5a	378	0.9375
C10G11.5a	129|132|246|279|281|768|905|977|1251|1395|1519|1549	0.9318|0.9333|0.977|0.9155|0.9762|0.9211|0.9535|0.95|0.9375|0.9054|0.9143|0.9259
C10G11.7a.2	685|895|898|934|1213|1232|1460|1463	0.92|0.92|0.9091|0.9048|0.92|0.9412|0.9286|0.9048
C10G11.7a.3	685|895|898|1042|1196|1211|1213|1229|1233|1461|1464	0.9623|0.9459|0.913|0.9167|0.9216|0.9388|0.9412|0.9487|0.9595|0.9583|0.9394
C10G6.1a.1	1833	0.9545
C10G8.5b	1520	0.9259
C10H11.3	154	0.9048
C10H11.6a	221|1221	0.9|0.9
C11D2.7	53|89|122|684	0.9342|0.9362|0.9444|0.9
C11E4.1	78|81|118|154|322|639|887	0.92|0.9706|0.9412|0.9381|0.9623|0.9512|0.9423
C11E4.2	491|568|749	0.9091|0.95|0.9149
C12D12.2a	1035|1600	0.9048|0.9444
C12D5.3	650	0.9091
C12D5.5	254|386|441|469|537	0.9|0.9149|0.913|0.9231|0.9091
C12D8.10a.2	458	0.9167
C12D8.10b.1	458|594|646|1019|1317|1566	0.931|0.92|0.9048|0.9333|0.9048|0.9333
C12D8.10b.2	1019|1566	0.92|0.913
C12D8.11.1	284|497|564|781|951|1504|1507|1681|1684	0.9524|0.931|0.9074|0.9556|0.9412|0.9692|0.95|0.9383|0.9091
C12D8.11.2	284|781|951|959|1137|1260|1504|1507|1628|1681	0.9615|0.9649|0.963|0.9|0.9286|0.961|0.9821|0.9516|0.9231|0.9262
C12D8.14	148|253	0.9355|0.9574
C12D8.1a	163|1430|1751	0.9118|0.9302|0.931
C13A2.12	272|287|290|317|360|377|420|433|437|480|493|497|553|557|600|617|673|677	0.9697|0.9091|0.9091|0.913|0.9467|0.9259|0.9474|0.9138|0.9677|0.9367|0.9206|0.9545|0.95|0.942|0.9438|0.9552|0.9111|0.9516
C13B4.2	510|680|927|1502	0.9318|0.9048|0.9|0.9394
C13B9.3.2	563|994|1351|1393	0.9048|0.9444|0.9355|0.9259
C13C4.5	1538	0.9375
C13F10.4	5168|5385|5620	0.9|0.913|0.9259
C13G3.3c	620|2002	0.9259|0.913
C14A11.7	871	0.9091
C14A4.1	258|334|372|619	0.9848|0.9293|0.9545|0.9797
C14A4.10	391	0.9259
C14A4.11	86	0.9231
C14A4.2	345	0.9231
C14A4.5	456	0.9167
C14A6.1	607|819|832|1091	0.9143|0.9394|0.9091|0.9
C14B1.1.1	300|659|665|857|988|1066|1307|1342|1457|1459	0.9574|0.901|0.954|0.9403|0.9226|0.9302|0.9135|0.9774|0.9444|0.9694
C14B1.1.2	1327|1444	0.931|0.9167
C14B1.2	405	0.9
C14B1.5	501	0.9375
C14B1.6a	1906	0.9167
C14B9.10.1	100|188	0.9318|0.955
C14B9.2	738|768|955|1281|1640|1719	0.9091|0.9206|0.9167|0.9394|0.9231|0.9091
C14B9.4a	690|1658	0.92|0.9259
C14B9.7	182|261	0.9475|0.9876
C14C10.3a	127|348|488|742|745|1079|1988	0.9609|0.9464|0.9634|0.9438|0.9535|0.9744|0.9321
C14C10.4	638|1778|2984	0.9|0.9|0.9429
C14C10.7	332	0.9167
C14C11.3	241|1273|1631	0.9091|0.913|0.9333
C14C11.7	157	0.9091
C14C6.2a	263|371|602	0.9091|0.925|0.9394
C14F11.1a.1	252|588|597|599|712|748|976|1181|1297|1450	0.9788|0.95|0.9745|0.948|0.9744|0.9388|0.9231|0.9879|0.9084|0.9744
C14F11.1a.2	224|569|684|1153|1422	0.9512|0.9318|0.9211|0.9804|0.9375
C14F11.2	1361|1554|1916|1918	0.9333|0.9231|0.9333|0.913
C14F11.3	144|759|1020|1307	0.9091|0.9455|0.9286|0.9315
C14F11.5a	385|1086|1203|1217	0.9355|0.9057|0.9302|0.9333
C14F5.1a	144|146|445|488|671|925|951|953|976|1015|1079	0.9661|0.9621|0.9778|0.9231|0.9758|0.9479|0.9259|0.9839|0.9184|0.9565|0.9167
C14F5.2	395|530|689	0.9455|0.9032|0.9412
C14F5.5	1240	0.9412
C14H10.1	241|596|846|1000	0.9565|0.9286|0.9302|0.913
C14H10.2b.1	1878	0.9
C15A11.7a	257|1004|1079|1316	0.9375|0.9444|0.9691|0.9583
C15B12.1	969	0.9
C15C7.4.1	302|617|765|866|867|924|1003	0.9636|0.9545|0.9|0.9268|0.9817|0.9459|0.9615
C15C7.5.1	279|282	0.9167|0.9394
C15C7.5.2	282|574|592	0.96|0.9|0.9167
C15C8.1	380|801|974|1047|1173|1179	0.9143|0.9412|0.9333|0.95|0.9062|0.9524
C15C8.3a	422|553|632|658|706|976|1228	0.9241|0.907|0.9451|0.931|0.9048|0.9759|0.9184
C15C8.7	394|437	0.9556|0.9592
C15F1.1a	396|468	0.9|0.9
C15F1.6	97|378|663|727|747|826|865	0.9123|0.9235|0.9589|0.9|0.9615|0.9429|0.9587
C15F1.7a	98|257|420|525|542|545	0.9444|0.9486|0.9607|0.9029|0.9091|0.9661
C15F1.7b.1	51|210|297|373|498	0.9167|0.966|0.931|0.9451|0.9592
C15F1.7b.2	360	0.9091
C15H11.4.1	74|775|926	0.9|0.9318|0.939
C15H11.4.2	916	0.9167
C15H11.7	157|293|726|851|861|882	0.9167|0.977|0.9074|0.931|0.9245|0.9219
C15H11.9	167|288|1097	0.9375|0.9048|0.9333
C15H9.1	570|1052|1221|1311|1488|1640|1986|2054|2297|2688|2919|2922|3168	0.9524|0.9167|0.9149|0.9167|0.9583|0.9167|0.9592|0.9167|0.9706|0.9155|0.9733|0.9206|0.9524
C15H9.11.1	314|361|363	0.9318|0.9854|0.9286
C15H9.6a.1	585|1353|1722|2497|2499	0.9091|0.92|0.9355|0.9167|0.9
C15H9.6a.2	31|215|306|1074|1367|1368|1443|1591|1592|1739|2218|2220|2294|2363	0.9216|0.9403|0.9655|0.9634|0.9186|0.9101|0.9254|0.918|0.9242|0.9434|0.9286|0.939|0.9474|0.9118
C15H9.6a.5	199|290|1351|1427	0.931|0.9091|0.9032|0.9167
C15H9.7	1352	0.9167
C15H9.9.1	117	0.9571
C15H9.9.3	366	0.9167
C16A11.4b	1206	0.913
C16A3.10.1	1367	0.9091
C16A3.10.2	42	0.9
C16A3.4.1	128|206|744|1192	0.9|0.9048|0.9423|0.9138
C16A3.4.2	206|279|744|992|1192	0.9333|0.9167|0.9077|0.9|0.9091
C16A3.5.1	547|556|563|566	0.9276|0.9412|0.9769|0.913
C16A3.6	130|891|894|993|1103	0.9497|0.978|0.9806|0.931|0.975
C16A3.7	1143|1716	0.9048|0.9167
C16A3.8	4076	0.9167
C16A3.9	74|320|419|481	0.9403|0.9938|0.99|0.9185
C16B8.1.1	1717	0.9048
C16B8.3	24|218|278|356|379	0.9032|0.906|0.9|0.9189|0.9504
C16C10.10	719|897|901	0.9362|0.9048|0.9091
C16C10.11.2	10|72|87|110|111|113|308|311|314|317|394|472|613|676	0.9341|0.9038|0.9655|0.9091|0.9434|0.9545|0.9592|0.9759|0.9615|0.9167|0.9118|0.9159|0.9487|0.9619
C16C10.2	312	0.9545
C16C10.5	1098	0.9231
C16C10.7a	110	0.9062
C16C10.8	35|93|410|416	0.9286|0.9766|0.9595|0.942
C16C2.2a.1	1079	0.9
C16C2.4a	26|319|524|1052	0.9444|0.9565|0.9259|0.9091
C16D2.2	168|171	0.92|0.9231
C16H3.2	191	0.9692
C17E4.10a.1	696|1281|1457	0.9062|0.9|0.9118
C17E4.5	223|720	0.9118|0.9535
C17E4.9a.1	1386|1540|1887|1891|2018|2109|2208	0.9286|0.9615|0.9762|0.9138|0.902|0.9423|0.931
C17F4.7.1	257|402|522	0.9|0.9557|0.9783
C17F4.7.2	257|402|522	0.9062|0.983|0.9596
C17G1.3a	1315|1351	0.9|0.9167
C17G1.7	230|648|833	0.9167|0.92|0.9118
C17G1.8.1	582	0.9048
C17G10.5.1	280|462|487|740|744|793|804|806|814	0.982|0.9888|0.9082|0.9744|0.9176|0.979|0.9|0.9655|0.9565
C17G10.5.2	267|449|727|780	0.9333|0.925|0.9444|0.9259
C17G10.8	173	0.92
C17G10.9a	1525|1605|1737	0.9048|0.9048|0.9167
C17G10.9b	1731	0.9429
C17H12.1	104|107|900|2310|2399	0.913|0.9231|0.9167|0.9487|0.9268
C17H12.10	529|651	0.9|0.9048
C17H12.13a	366|1060	0.9024|0.9189
C17H12.13b.2	180	0.9167
C17H12.14	235|722|786|814|955	0.9419|0.9804|0.9914|0.9189|0.9864
C18A11.1	425|465	0.931|0.9333
C18A11.2	111	0.9535
C18A11.7a	1254|2049|2185	0.9839|0.9091|0.9231
C18A11.7b	300	0.9286
C18A3.3	255|378|528	0.9091|0.9375|0.9091
C18A3.4a.1	171|432	0.9268|0.92
C18A3.5a	584|621|1439	0.9062|0.9556|0.9211
C18B12.4	246|1087|1255|1333	0.9|0.9123|0.9394|0.9333
C18B2.3.1	50|114|540|661|815|900	0.9|0.9302|0.9136|0.96|0.9412|0.9412
C18B2.4	12|21|24|26|251|426|567|777	0.913|0.9167|0.9157|0.9149|0.9167|0.9286|0.9412|0.9355
C18B2.5a	113|316|809|1050|1171|1472|1947	0.9459|0.9487|0.9636|0.9048|0.9474|0.9032|0.913
C18C4.10b.2	1591	0.9062
C18C4.3.2	1504	0.9048
C18D1.3	93|123|301	0.9612|0.9487|0.9068
C18D11.1	408|410|411|778|781	0.9455|0.9388|0.9167|0.9154|0.9316
C18D11.2	129	0.9062
C18E9.1	139|440|682|691	0.9375|0.96|0.9667|0.913
C18E9.2a	581|1025|1103|1305	0.9615|0.9375|0.9024|0.9074
C18E9.4.1	111|275|285	0.9524|0.9615|0.9216
C18E9.9	233|380|389|437	0.9091|0.9167|0.9032|0.9592
C18F3.4b	753	0.9
C18G1.1	653	0.9091
C18G1.5	299	0.9107
C18H7.3	54|536|569|887|1199	0.9048|0.9|0.9048|0.9259|0.92
C23F12.4.1	690|754|837	0.9048|0.9091|0.9
C23G10.11.1	79|177|180|243	0.9211|0.9245|0.9697|0.9594
C23G10.2a.1	307	0.9512
C23G10.2a.2	161	0.9429
C23G10.2b	153|184	0.9048|0.95
C23G10.3	265|741|753|777	0.9956|0.945|0.9574|0.9509
C23G10.4b.2	294|1323|1704|1705|2112|2406|2503|2534|2558|2600|2830|2939|2949|2953|2964	0.913|0.9268|0.9167|0.9167|0.9|0.9091|0.9583|0.9718|0.9535|0.9231|0.9|0.9545|0.9062|0.96|0.9487
C23G10.8	213|946|1593|1734|2631	0.9048|0.9|0.9459|0.9286|0.9091
C23H3.2a.1	340	0.9211
C23H3.3b	688	0.9286
C23H3.4a.1	1390	0.9302
C23H3.4b.1	373	0.92
C23H4.1.1	1126|1227|1228|1413|1451|1482|1504|1608|1870|1872|2014|2016	0.9494|0.9851|0.9659|0.9524|0.9172|0.9677|0.9597|0.9103|0.9138|0.9595|0.9306|0.9487
C23H4.1.2	494|495|1096|1197|1198|1226|1383|1452|1474|1842|1986	0.9394|0.9286|0.9716|0.9786|0.9608|0.9196|0.9538|0.9718|0.9574|0.9231|0.9318
C23H4.1.3	449|450|927|1024|1051|1152|1153|1338|1407|1429|1795|1797|1939|1941	0.9143|0.9333|0.9265|0.9136|0.9333|0.951|0.9135|0.971|0.9767|0.9375|0.9155|0.9219|0.9429|0.9545
C23H4.1.4	379|380|981|1082|1083|1111|1268|1306|1337|1359|1725|1727|1869|1871	0.931|0.9231|0.947|0.9706|0.9583|0.9217|0.9565|0.9111|0.9688|0.9609|0.9104|0.9324|0.9114|0.9362
C23H5.8a	560	0.9111
C23H5.9	45|233|457|571	0.956|0.9434|0.972|0.9355
C24A11.8a	1208	0.9167
C24A11.8b	989|1060	0.9091|0.913
C24A3.2a.1	224|225	0.9167|0.913
C24A8.4	701|1118	0.9375|0.9565
C24B5.2a	1132	0.9048
C24B9.3	205|232|234|412|626|702|930|1098|1107|1187|1341	0.9048|0.9024|0.9753|0.9615|0.9077|0.9348|0.9474|0.9362|0.9097|0.9394|0.9242
C24B9.9	23|24|225|310	0.9186|0.9159|0.9478|0.9795
C24D10.6	63|305|422|484	0.9355|0.9143|0.9375|0.92
C24F3.1a	287|520|524|1042|1045|1048|1051|1277|1376	0.9259|0.9367|0.95|0.913|0.95|0.9649|0.9048|0.9692|0.9298
C24F3.4a	677|1121	0.9|0.9048
C24F3.6.1	305|606|801	0.9048|0.92|0.9048
C24G6.2a	2606	0.913
C24G6.4	2015	0.913
C24G6.6.3	630|1292|1526|1663	0.9333|0.9259|0.9167|0.931
C24G6.8b.1	1175|1309	0.9189|0.9149
C24H10.2	916	0.913
C24H10.5	459|894|978	0.9259|0.9189|0.9091
C24H12.4a	525|897|1828|1859	0.9048|0.9143|0.9048|0.9394
C25A1.1	65|348|357	0.913|0.9355|0.92
C25A1.16a.1	148|238|279|281	0.9716|0.9365|0.9589|0.954
C25A1.16a.2	267	0.9
C25A1.4.1	1597|1648	0.9|0.9355
C25A1.5	586|1059|1063|1164	0.9048|0.9333|0.942|0.9583
C25A1.8	47|366|369|550	0.9|0.9623|0.9355|0.9518
C25A11.4b	4734|4771|4775	0.9167|0.9444|0.9286
C25A8.4	2225	0.913
C25B8.3a	90|528|713|722|724|889|1163	0.9718|0.9024|0.9123|0.9606|0.9472|0.95|0.9394
C25B8.3b	717	0.9091
C25B8.6	566|1450|1507	0.9|0.9048|0.9
C25D7.15a	201|431	0.9048|0.9167
C25D7.6	2497	0.9048
C25D7.7	267	0.9412
C25D7.8.2	316	0.9167
C25E10.12	315	0.9667
C25E10.3a	493	0.9
C25E10.8	101	0.9459
C25F6.2a	1546|1779|2449|3427|3429	0.9048|0.913|0.9048|0.9|0.931
C25F9.10a	590	0.9
C25F9.11	133|135|136|299|459|468	0.9508|0.9595|0.9383|0.9126|0.95|0.9412
C25F9.7	84	0.9231
C25G4.10a	1647	0.9231
C25G4.2.1	248|272|273	0.9384|0.9543|0.9098
C25G4.5	1462|2312|2494|3471	0.9048|0.92|0.931|0.913
C25G6.2.1	471|480|1037	0.9355|0.92|0.9375
C25H3.12	484	0.9091
C25H3.5	103|172|317|330	0.9467|0.9479|0.94|0.9217
C25H3.6a	1190|2344	0.9167|0.9091
C25H3.7a	48|340|359	0.9531|0.9167|0.92
C25H3.9a	125|232|388|576|771	0.9198|0.9324|0.9565|0.9477|0.9239
C26B2.3a.1	1510|1932	0.9394|0.9
C26B2.6	243|326|327|508|638|747|750|969|971|972	0.931|0.931|0.9512|0.9|0.9333|0.9423|0.9412|0.9344|0.9429|0.9667
C26B9.5	305|1529	0.9259|0.9091
C26C6.1a	4264|5100	0.9048|0.9
C26C6.2	143|931|1074|1718|1812	0.9143|0.9355|0.9048|0.9167|0.9167
C26D10.1	1154|1631	0.9091|0.9355
C26D10.2a	426|548|1268|1303|1441	0.9437|0.9032|0.9323|0.945|0.931
C26E6.11	183|347	0.9|0.9
C26E6.5	710|897	0.9286|0.9
C26E6.8a	271|812|839	0.913|0.931|0.9062
C26F1.10	18|215|269|301|429	0.9286|0.9259|0.9459|0.9474|0.968
C26F1.2	140|1284|1572	0.92|0.9231|0.9394
C26F1.4.1	234|311	0.9273|0.9949
C26F1.4.2	234|311	0.9225|0.9947
C26F1.4.3	309	0.9858
C26F1.7a.1	283|466|639	0.9|0.913|0.9118
C26F1.7b	246	0.9091
C26F1.9	44|161|164	0.9941|0.9899|0.9981
C27A12.8.1	246|822|1121|1759|1788	0.931|0.9231|0.9|0.913|0.9429
C27A2.2a	51|323|354	0.9312|0.9779|0.9695
C27B7.2	317|520	0.9091|0.9091
C27B7.4	3648	0.9048
C27B7.8	273|364	0.9524|0.9412
C27D11.1	20|236|279|448|799|1213|1216|1279|1399|2579|2877|2897|3380|3381|3436	0.9302|0.9167|0.9149|0.913|0.9444|0.9524|0.9355|0.9636|0.9388|0.9111|0.9403|0.9038|0.9783|0.974|0.9091
C27D6.12a	254|257	0.9298|0.9583
C27D6.12b	47|230|254|257	0.95|0.9167|0.9302|0.9636
C27D6.4a.1	420|491|716|937|1000|1171	0.961|0.9143|0.92|0.9592|0.9535|0.9605
C27D8.4	421	0.9048
C27F2.10.1	526|1103|1363	0.9048|0.9|0.9167
C27F2.4	181|281|833	0.9|0.9375|0.9333
C27F2.5	398|402|586	0.934|0.9406|0.95
C27F2.8	3732|4389|4408|5284|5541	0.9091|0.9429|0.9|0.9167|0.9091
C27F2.9	347|350	0.9355|0.95
C27H5.2a	904|1276	0.9091|0.92
C27H5.5c	252|471|473|665|713|981|996|997|1068|1070	0.9495|0.9252|0.9114|0.93|0.939|0.9032|0.9545|0.9375|0.9083|0.9438
C27H6.2	1302	0.913
C27H6.4a	716|818	0.9|0.9032
C27H6.4c.3	321	0.9048
C27H6.8	650|951|1117|1154	0.931|0.9091|0.9|0.92
C28C12.2	41	0.9545
C28C12.5	313|611|613|631|725|812|1030|1237	0.9846|0.9226|0.9727|0.951|0.92|0.9104|0.9596|0.9356
C28C12.7a	153|156|328|330|480|809|811	0.9951|0.9842|0.9679|0.9864|0.9062|0.9907|0.9167
C28C12.7b	153|156|328|330|687|935|1165|1167|1245	0.9677|0.96|0.9259|0.9394|0.9701|0.9091|0.9333|0.9444|0.9306
C28D4.1.1	419|559|816	0.9429|0.9512|0.96
C28D4.2a	255|1352	0.9167|0.9048
C28D4.3.1	88|1035|1061	0.9412|0.92|0.9118
C28D4.9a	126|776|1076|1239|1449|1451|1507	0.9231|0.9636|0.9286|0.9286|0.9091|0.9231|0.9492
C28G1.5b	389	0.9091
C28H8.1	264	0.913
C28H8.11a.1	869|882	0.9459|0.9412
C28H8.12.1	577	0.9167
C28H8.12.2	439|441|574|577	0.9167|0.9167|0.9286|0.95
C28H8.3	12|69|165|767|934|936|964|1089|1592|1884|2438|2836|2917|3061|3125|3921|4064|4394|4709|4773|4776|4886|4978|5200|5216|5404	0.92|0.9355|0.913|0.9375|0.9583|0.9375|0.9048|0.9429|0.9211|0.9|0.907|0.9048|0.9344|0.925|0.9556|0.9667|0.977|0.9574|0.9667|0.9333|0.9556|0.9274|0.9453|0.9423|0.9259|0.9041
C28H8.4.2	221|223|319|345|445|482|484|873	0.9|0.9535|0.963|0.9677|0.9429|0.975|0.974|0.9231
C28H8.6c	190|715|717	0.9216|0.9556|0.9091
C28H8.9a	1191|1300	0.9434|0.925
C29E4.1	736|930	0.9048|0.95
C29E4.12	200|258|479	0.9306|0.9091|0.9524
C29E4.3a	1570|3048	0.9167|0.9091
C29E4.8.1	176|891|899|1038	0.9024|0.9333|0.931|0.9259
C29E4.8.2	647|827|835	0.9333|0.9143|0.9429
C29F3.7a	366|388|389|644|1028|1210	0.9636|0.9275|0.9265|0.9254|0.92|0.913
C29F4.1	182|191|325|361|388|411|414|431|650|673	0.9091|0.9328|0.9524|0.9651|0.9423|0.977|0.9774|0.9333|0.9375|0.9367
C29F5.8	344	0.913
C29F7.2a	355|395|695|698|818|1276	0.974|0.9604|0.9592|0.9189|0.9412|0.9385
C29F7.3	562|649|752	0.9231|0.9118|0.9231
C29F9.3a.1	509	0.9355
C29F9.4	303	0.9
C29F9.7	512|514|956|1023	0.9375|0.9|0.92|0.931
C29G2.6	448	0.9444
C29H12.1	440|1171|1725	0.92|0.9167|0.9048
C29H12.2.1	119|123|455|492|832|904|988|1091|1161|1339	0.9|0.9487|0.9|0.9516|0.9423|0.9459|0.925|0.9744|0.9275|0.931
C30A5.3	225|715	0.9434|0.913
C30B5.2a	78	0.9091
C30C11.2.2	135|199|465|583|708|769|1526	0.9773|0.9254|0.913|0.9167|0.9722|0.9167|0.9259
C30C11.4.1	208|404|570|873|2158|2316|2367	0.9344|0.9167|0.9697|0.9041|0.9107|0.9|0.9032
C30C11.4.2	2356	0.9048
C30F12.1	753|788|1387|1617|1829	0.9286|0.9286|0.913|0.9333|0.9
C30F12.2.1	1138	0.92
C30F12.5a	657	0.9038
C30F12.7.1	520	0.9365
C30F2.4	28	0.9231
C30F8.2.1	233|1051|1304|1307	0.9259|0.9355|0.9167|0.9298
C30F8.2.2	1301	0.9231
C30G4.4s.5	534|581	0.9167|0.9608
C30G7.1	172|442|653|674	0.907|0.9647|0.9915|0.9291
C30G7.2b	532	0.9545
C30H6.10	387|389	0.9459|0.913
C30H6.7a	50|100|209|211|238|384	0.95|0.9104|0.9712|0.9111|0.9111|0.9253
C30H6.8.1	72|210|507	0.9259|0.9429|0.9394
C30H6.9.1	520	0.9333
C31B8.8	1126|1202	0.9048|0.913
C31C9.2	209|569	0.97|0.9286
C31C9.7.1	247	0.9394
C31C9.7.2	42|247	0.9355|0.9556
C31E10.7.1	44|374|421|473	0.9174|0.9091|0.9636|0.9218
C31H1.6a	282|849|1101	0.9167|0.913|0.92
C31H5.4	32|245	0.9651|0.9565
C32D5.1	842	0.9091
C32D5.11	864|958|2144|2406	0.92|0.9286|0.9091|0.92
C32D5.2	1147|1448	0.9091|0.9032
C32D5.3.2	287|1095|1336|1464|1583|1605	0.9|0.9091|0.9394|0.9259|0.913|0.913
C32D5.8b	166|545|661	0.9432|0.9589|0.9032
C32D5.9	99|109|216|477	0.9056|0.933|0.9262|0.9114
C32E8.11	4526|5380	0.9167|0.9091
C32E8.2a.1	49|51|161|272|274|376|428|614	0.9056|0.9078|0.9504|0.9194|0.9469|0.9824|0.96|0.9761
C32E8.2a.2	49|161|272|274|376|428|614	0.901|0.9461|0.9216|0.9469|0.9775|0.9811|0.9184
C32E8.3	14|17|20|86|292|400	0.9677|0.9608|0.9259|0.9348|0.9647|0.9278
C32F10.1a.1	425|427|637	0.9032|0.9062|0.9333
C32F10.4	93|96|559|679|888|890	0.9381|0.978|0.9709|0.9333|0.9286|0.9111
C32F10.8a.1	112|312|320|1306|1350|1630	0.913|0.9565|0.9425|0.9429|0.9694|0.931
C32F10.8a.2	1351	0.9
C33A11.1.2	75|275|465|467|537|541|584|593|609|691|977|1314|1621|1644|1850|1950|2378	0.9333|0.9242|0.9286|0.9298|0.9355|0.9231|0.9474|0.9216|0.9423|0.9118|0.9143|0.9189|0.9355|0.9355|0.9714|0.913|0.9595
C33A11.4a	850|982|1067|1567|1938	0.9259|0.9333|0.9167|0.9231|0.92
C33A12.1	51|309|397|450	0.9034|0.95|0.9759|0.9478
C33A12.19a	299|538	0.9118|0.9862
C33A12.2	326	0.9712
C33A12.3a	244|474|830|938|963	0.9355|0.9167|0.9|0.9394|0.9245
C33A12.7	309	0.9
C33B4.4	152|230	0.9024|0.9231
C33D3.1	1320|1322	0.9048|0.9
C33D9.6a	676|868	0.92|0.9048
C33F10.14	274	0.9268
C33F10.9	172	0.9412
C33G8.4	236|262	0.9524|0.9573
C33G8.6	116|236|582|701|744	0.931|0.9535|0.9167|0.9375|0.913
C33H5.10	415	0.9231
C33H5.12a	493	0.9286
C33H5.13a	307|409	0.9512|0.9394
C33H5.19	373	0.9394
C33H5.7	969|971	0.931|0.9
C33H5.9	2002	0.9091
C34B2.10	209	0.9375
C34B2.5	202	0.931
C34B2.6	280|1255	0.9|0.9259
C34B2.7.1	1074	0.913
C34B2.8	90|143|271|272|573|575	0.9701|0.9231|0.9437|0.9091|0.9802|0.9578
C34B4.2a.1	1098	0.9
C34C12.2	1251	0.9
C34C12.4.1	160	0.9074
C34C12.5.2	463|802|884|901	0.9032|0.9216|0.9167|0.9
C34C6.3	155|302|1220|1223	0.9211|0.9444|0.9744|0.9375
C34C6.4	1555	0.9
C34C6.6a	57	0.9091
C34C6.7a	479|947	0.9556|0.9286
C34D1.4a	49	0.9412
C34D1.5a	700	0.913
C34D10.2a.2	3164|3740	0.9412|0.9091
C34D4.13	268|408	0.9318|0.9091
C34E10.1.1	89|888|1266|1487	0.9189|0.9231|0.913|0.9268
C34E10.2	186|326|799	0.9048|0.92|0.9
C34E10.6.1	63|97|529|532|1021|1156|1166|1220|1228|1239|1450|1505|1555|1610|1750|1787|1790	0.9394|0.97|0.9524|0.9434|0.9|0.971|0.9531|0.9685|0.9552|0.92|0.9683|0.9268|0.9459|0.9595|0.9474|0.95|0.9649
C34E10.6.2	87|97|529|532|1156|1220|1228|1412|1450|1700	0.9167|0.9565|0.9091|0.9143|0.9565|0.9692|0.9375|0.9111|0.92|0.913
C34E10.6.3	63|97|175|232|529|532|653|1021|1129|1156|1166|1216|1220|1228|1239|1250|1412|1450|1505|1610|1770|1807|1810	0.9905|0.9944|0.918|0.9612|0.9917|0.958|0.9675|0.9264|0.95|0.9778|0.9567|0.9602|0.9811|0.9668|0.9832|0.9167|0.9199|0.99|0.9|0.9646|0.9354|0.9123|0.9752
C34E10.8	1948|2735|3133	0.9048|0.9259|0.9286
C34E11.1	231|273|275|1510	0.9211|0.931|0.9231|0.9167
C34E7.1a.1	88|164|766|1068	0.9167|0.913|0.9231|0.9118
C34F11.3a	169|460|1093|1216|1449|2028|2119|2291|2465	0.92|0.96|0.9535|0.9167|0.9556|0.9639|0.931|0.9474|0.931
C34F11.8	150|346|791	0.9444|0.9048|0.9254
C34F11.9a	1484	0.9167
C34F6.2	189|229|443|543|627|629|739|806|815	0.9462|0.9623|0.9444|0.9235|0.9722|0.976|0.9036|0.9765|0.9429
C34F6.3	682	0.9091
C34F6.8.1	334|828|1017	0.9167|0.9259|0.9167
C34F6.8.2	954	0.9
C34F6.8.3	713	0.9091
C34G6.2	395|1551	0.9412|0.9556
C34G6.6a	3584	0.9231
C34G6.7a.1	604|1287|1290|1405	0.913|0.9259|0.9412|0.9
C34G6.7a.2	748|1284|1347	0.9048|0.9429|0.9333
C34H4.4	63|101|277|528|794|795	0.9266|0.9242|0.9403|0.9286|0.9821|0.9266
C35A5.11a	600	0.9375
C35A5.6a	171|180|320	0.9706|0.9326|0.9649
C35A5.8	1307|1716|1938|2437|2440|2702	0.9167|0.9259|0.9286|0.9048|0.9394|0.9394
C35B1.2a	1442|1677	0.9375|0.9167
C35B1.4	57	0.9318
C35B1.5	195	0.9718
C35B8.4	346	0.9143
C35C5.10b	329	0.9048
C35C5.3a	532|892	0.9211|0.913
C35C5.3b	77|295|541|901	0.9531|0.9167|0.9672|0.9167
C35C5.4a	589	0.931
C35C5.8a	139|259|543|802|830|868|871|1217|1247|1340|1393	0.9595|0.939|0.903|0.9697|0.9245|0.9822|0.9856|0.9384|0.9467|0.9216|0.9091
C35C5.9.1	212	0.9032
C35D10.10	416|664|841	0.9118|0.9091|0.9429
C35D10.11	139|191|352	0.9167|0.9412|0.9032
C35D10.13	371	0.913
C35D10.16	58|334|386|487	0.9123|0.9184|0.9286|0.9375
C35D10.5	719	0.9048
C35D10.6	543|661|663	0.9242|0.9091|0.9592
C35E7.2a	1485	0.9048
C36A4.2	476	0.9231
C36A4.4	1033	0.9512
C36A4.9a.1	352|454|489|633|695|777|951|996|1242|1274|1436|1470|2016|2106|2207|2260	0.9596|0.9395|0.988|0.9541|0.9636|0.9602|0.9116|0.9087|0.9699|0.9459|0.9416|0.9115|0.9755|0.9378|0.9024|0.9176
C36A4.9a.2	403|438|945|1385|1965|2209	0.9057|0.9355|0.913|0.954|0.9623|0.907
C36A4.9b	733|2062|2089	0.9|0.9302|0.9211
C36B1.12a.2	1928	0.9091
C36B1.14	255	0.92
C36B1.3	109|920|926	0.9167|0.9459|0.9104
C36B1.4.1	87|596|602|738	0.9|0.9|0.9444|0.931
C36B1.5	1391	0.9048
C36B7.6	1563	0.913
C36E6.3	633|752|944|1043|1190	0.9762|0.9556|0.9343|0.9087|0.9712
C36E6.5	327|484|560	0.9951|0.9904|0.9153
C36E8.1.1	1248|1606|1674|1771|1886|1927|2232|2360|2410	0.9429|0.9189|0.9286|0.9794|0.902|0.9756|0.9231|0.9091|0.9683
C36E8.1.2	1742|1898|2381	0.9189|0.9333|0.9375
C36E8.2	93	0.9091
C36E8.3	197|296	0.9259|0.9
C36E8.5.1	469|774|805|808|836|1178|1346|1457	0.9722|0.9564|0.9228|0.9156|0.9125|0.9403|0.9355|0.9268
C36E8.5.2	758|820	0.9455|0.9375
C36E8.5.3	789|1330	0.9153|0.9143
C36E8.5.4	453|758|820|1162|1330	0.9333|0.9434|0.9444|0.9375|0.92
C36H8.2	201|524	0.9032|0.913
C36H8.3	555|597	0.9569|0.9375
C37A2.7	63|356	0.9228|0.9722
C37C3.12	355|471	0.9412|0.9048
C37C3.13.1	305|346	0.9341|0.9091
C37C3.2a.1	75|339|1153|1157	0.9265|0.9091|0.9048|0.9125
C37C3.6a.1	3234|3802|4132|4139|4394	0.9091|0.9091|0.9|0.92|0.9048
C37C3.8b.1	440|1170	0.9091|0.9032
C37C3.8c	679	0.9412
C37E2.1.2	464	0.9231
C37H5.6a	518|1065|1456|1593|1595|1731	0.9054|0.9878|0.9306|0.9692|0.9401|0.9159
C37H5.6b	345|426|892|975|1283|1420|1422	0.9627|0.9045|0.9868|0.902|0.9589|0.9615|0.9659
C37H5.8	2147|2281	0.9091|0.9107
C38C10.2	189|191|767|939|941|1082	0.9118|0.9048|0.9615|0.9107|0.9|0.9333
C38C3.10	332	0.931
C38C3.5a.1	310|445|647|777|1203|1268	0.9091|0.925|0.9589|0.9474|0.9495|0.9701
C38C3.5c	86|128	0.9685|0.9327
C38C6.2a	711|1369|1703|1808	0.9|0.9|0.92|0.913
C38D4.6a.2	1041	0.9048
C39D10.2	186|361	0.9242|0.9
C39D10.8c	537	0.9231
C39E6.1	1728	0.9048
C39E9.11	172|1085	0.913|0.9
C39E9.12	743	0.9259
C39E9.13	246|860|988	0.9048|0.9259|0.9149
C39E9.14b.1	94|490|836|915|1141	0.9286|0.9474|0.9362|0.9091|0.9268
C39E9.2	133|392|625	0.9|0.9167|0.9091
C39E9.8b	85|562|901	0.9254|0.9231|0.9024
C39F7.4	60|121	0.9274|0.9065
C39H7.4	42|48|50|255|756|774	0.931|0.9394|0.9032|0.9565|0.9231|0.9167
C40H1.4	556|694	0.931|0.913
C40H1.5	8|45|381	0.9732|0.9485|0.9565
C40H1.6	119|122|485	0.913|0.9|0.9048
C40H1.8.1	742	0.9167
C41C4.10a	557|705|708	0.9|0.9259|0.92
C41C4.6	2732	0.9048
C41C4.7a	370|660|925	0.9167|0.9167|0.9765
C41C4.8.1	148|453|836|1141|1572|2090|2108|2529	0.9|0.9167|0.9032|0.9286|0.9091|0.9574|0.9259|0.9
C41C4.8.2	74|379|1065|1067|1895|1951|2016|2455	0.9048|0.92|0.9|0.9048|0.9524|0.9455|0.9524|0.92
C41D11.2	383|1423	0.9091|0.9
C41D11.5	394|488	0.9167|0.9048
C41D11.8	42|60|104|373|462|489|736	0.9697|0.9733|0.9297|0.9062|0.9714|0.9314|0.9043
C41G7.2.1	1333	0.9
C41G7.9a.1	73|237|447|699	0.9259|0.9592|0.9412|0.9302
C41G7.9b	296|506	0.9524|0.9293
C42C1.10b	918	0.9
C42C1.14	322	0.9291
C42C1.15	930	0.9286
C42C1.5.1	1107	0.9
C42D4.1.1	120|132|509|819|868	0.9871|0.9136|0.9683|0.9091|0.9116
C42D8.2a.1	1063|1204|1843|1845|2432|2752|3531|3861|3892|3963|3967|4298|4364	0.9062|0.931|0.9474|0.9231|0.9259|0.913|0.9286|0.9459|0.9|0.92|0.9231|0.9118|0.9091
C42D8.2a.2	212|658|1204|1321|1773|1843|1918|2485|2610|2752|2954|3356|3395|3531|3780|3861|4298|4364|4773|4846	0.9|0.9394|0.9318|0.9091|0.9286|0.9434|0.931|0.9412|0.9375|0.9672|0.9259|0.9535|0.9429|0.9189|0.9464|0.9432|0.9123|0.9298|0.9213|0.9333
C42D8.8a	469|584|1014|1039|1041|1043|1063|1173|1195|1199|1201|1205|1798|1979|1981|2002|2127|2142|2294|2423|2464|2657	0.9527|0.9143|0.9146|0.9795|0.9758|0.9833|0.9061|0.9733|0.9231|0.945|0.9664|0.9336|0.9111|0.9114|0.907|0.9783|0.9196|0.9651|0.9717|0.9116|0.9626|0.9231
C43E11.1	1796	0.9048
C43E11.10	1103|1635	0.92|0.931
C43E11.11.2	1426|1427	0.9091|0.92
C43E11.7	320	0.913
C43E11.8	793|1306	0.913|0.9
C43E11.9	386	0.9
C43F9.8	271|832	0.9286|0.9167
C43H6.1a	1202	0.913
C43H8.1	70|74	0.9032|0.9318
C43H8.2.1	677|1032|1036	0.9375|0.9167|0.9355
C44B11.3	352|477|896|933|1254|1543|1591	0.9688|0.9211|0.9|0.9016|0.9722|0.9423|0.9242
C44B11.4	178	0.9032
C44B11.6	353	0.9032
C44B12.1	161|419|422|455|478|528|685	0.9333|0.975|0.9412|0.931|0.9286|0.9101|0.9434
C44B12.2a	87|130|465|712|922|946|1054	0.9333|0.9545|0.972|0.9483|0.9541|0.9784|0.9452
C44B12.2b.2	832	0.9048
C44B12.5	56|117|205|404|407|681|684|697|777|780|782|864|939	0.9259|0.9765|0.9211|0.916|0.9857|0.9841|0.974|0.9519|0.9935|0.9919|0.9247|0.9273|0.9545
C44B7.1	308	0.9
C44B7.10.1	39|43|120|161|259|396|412|906|955|1041|1263|1274|1308|1462	0.9136|0.9931|0.9868|0.948|0.9358|0.9367|0.9249|0.9459|0.9191|0.9091|0.9341|0.9194|0.958|0.9765
C44B7.10.2	25|102|143|378|771|888|1256|1290	0.9459|0.9655|0.9286|0.9|0.9464|0.9172|0.9028|0.9153
C44B7.11	2454	0.9048
C44B7.5	49|173|176|339	0.9|0.9118|0.9254|0.9028
C44B7.6a.1	215|1515	0.9231|0.9048
C44B7.8	1339|1341	0.9|0.9412
C44B7.9	495|1134|1576|1607	0.9286|0.9062|0.931|0.9091
C44C1.2.1	191	0.9
C44C1.6	502|515	0.925|0.9032
C44C10.9b	790|794|1008	0.95|0.9512|0.9
C44C8.6.2	325|478|481|508|583|607|850|1340|1344|1380|1433	0.9524|0.9744|0.9375|0.9355|0.9143|0.9048|0.9167|0.9079|0.971|0.9355|0.9756
C44E12.1	978	0.9091
C44E4.3	98|99|228	0.9091|0.9|0.9
C44E4.4.1	512	0.913
C44E4.4.2	512	0.95
C44E4.6.2	354	0.92
C44F1.3.1	125|299	0.9|0.9294
C44F1.3.2	231	0.9661
C45B11.1b	359|362|464|1513|1523	0.913|0.9048|0.9167|0.913|0.9062
C45B11.3.1	181|223|457|461	0.9024|0.9231|0.9143|0.9167
C45B2.5	280	0.9286
C45E5.6a.1	1733|1752	0.9231|0.92
C45G3.5	246|250|1570|1718	0.9429|0.9143|0.9032|0.9286
C45G7.3	211|244|272|311	0.9552|0.9231|0.971|0.9185
C45G9.13	52|162|174|324	0.9375|0.9231|0.9592|0.9655
C45G9.6b	443	0.9329
C46A5.3a	563	0.9048
C46A5.9	387|1395|2407|2699	0.9167|0.9167|0.9|0.9
C46C11.3	466|613	0.9512|0.9048
C46C2.2.1	522|640|1833	0.9388|0.9259|0.913
C46C2.2.2	417|705|1744	0.9231|0.9231|0.9231
C46C2.5	147	0.9
C46F11.2a	180|287|746|1192|1299|1432	0.9048|0.907|0.9268|0.9492|0.9394|0.9138
C46F11.2b.2	1474	0.9
C46F11.5a	848|1217	0.9048|0.9167
C46F4.2.1	684	0.92
C46F4.2.2	293|580|662|1223|2063|2149|2408|2468	0.9091|0.9286|0.913|0.9412|0.9167|0.9375|0.9474|0.9444
C46G7.1	222	0.9823
C46G7.2	248|262|419	0.9444|0.9|0.9459
C46H11.2	963	0.92
C47B2.3.1	360|705|912|1146|1418	0.9231|0.9167|0.9487|0.9583|0.9429
C47B2.3.2	949|1021|1150|1156|1224|1274|1304|1341|1390|1393|1504|1506|1640|1662	0.9495|0.9231|0.9091|0.9815|0.9375|0.9255|0.9167|0.9|0.984|0.92|0.9|0.9583|0.9238|0.9655
C47B2.3.3	443|644|650|718|884|1156	0.9512|0.9091|0.9394|0.9091|0.9592|0.9429
C47B2.4	599|950	0.9048|0.9375
C47B2.5.1	114|269|288|381|919	0.9231|0.9231|0.9286|0.9388|0.9375
C47B2.6a	313	0.913
C47D12.2	616|1406|1467	0.9167|0.9032|0.913
C47D12.6a	605|1717	0.9259|0.9048
C47E12.1.2	320|387|480|538|660|662|1643	0.9796|0.9773|0.9692|0.9149|0.943|0.9146|0.9259
C47E12.4a	842|1009|1181|1183	0.9362|0.931|0.9016|0.9574
C47E12.4c.1	281|588|1068|1235|1409	0.9242|0.9057|0.9091|0.9143|0.9747
C47E12.4c.2	1382	0.9636
C47E12.4c.3	161|1189|1363	0.9355|0.9048|0.9583
C47E12.4c.4	1343	0.9259
C47E12.4d.3	1164	0.92
C47E12.5a.1	415|1233|1736|2124|2966|3346	0.9167|0.9091|0.9167|0.9032|0.913|0.9
C47E12.7	1101	0.9459
C47E12.8	621	0.9048
C47E8.4a.1	665	0.9048
C47E8.4a.2	622	0.9167
C47E8.5.1	272|274|1179|1418|1548|1551|1582|1661|1821|1831|2157|2160|2221	0.963|0.9378|0.9174|0.9706|0.9352|0.9737|0.9341|0.9894|0.9412|0.9125|0.92|0.963|0.9467
C47E8.5.2	254|256|601|1161|1400|1530|1533|1564|1643|1803|1813|2142	0.9048|0.931|0.9|0.9361|0.9333|0.9195|0.9661|0.9018|0.9843|0.9184|0.924|0.95
C47E8.5.3	350|421|423|810|1328|1567|1697|1700|1731|1810|1970|1980|2306|2309|2370	0.9192|0.9615|0.967|0.9003|0.9353|0.9583|0.9251|0.9778|0.9676|0.9887|0.9342|0.9194|0.9091|0.95|0.9211
C47E8.5.4	148|1053|1292|1422|1425|1535|1705|2095	0.9545|0.9088|0.9208|0.9388|0.9608|0.9902|0.9046|0.9524
C47E8.7.1	1058|1062|1072|1200|1650|2057|2059	0.9231|0.9|0.9286|0.9024|0.9623|0.931|0.9
C47G2.1	429|702|733|735|935|950|953|962|1067|1252|1266	0.9|0.9385|0.9375|0.913|0.96|0.9333|0.9091|0.9254|0.95|0.9118|0.9104
C48A7.2a.1	102|338|340|483|700|1683|2063|2073|2282|2339|2387	0.9062|0.9091|0.9524|0.9167|0.9444|0.9057|0.931|0.907|0.9167|0.963|0.9245
C48B4.1	959|1079	0.9167|0.9091
C48B4.7	33	0.9394
C48B6.2	191|272|624	0.9118|0.95|0.9
C48B6.3	1107	0.913
C48E7.1	169|346|370|395|667|697	0.9259|0.92|0.9333|0.9437|0.9796|0.9083
C48E7.10	143	0.9322
C48E7.11.1	187	0.9333
C48E7.2.2	1578|1580	0.913|0.913
C48E7.7	154|238	0.9355|0.9512
C49A1.10	202|492	0.9535|0.9385
C49A9.9a.1	913	0.9062
C49C3.12	378|696	0.9091|0.9333
C49C3.8a	405	0.9
C49C8.4.1	1429	0.9091
C49F5.1.2	644|684|959|1045|1074|1459|1617|1684|1808	0.9355|0.9817|0.985|0.9444|0.9347|0.9778|0.931|0.9545|0.9091
C49F5.7	210	0.9182
C49F8.3	161|167|170	0.907|0.9118|0.9412
C49G7.10a	410	0.9259
C49G7.3	28|30|66|159|166|274|276|279|324|327|395|627|672	0.9841|0.9246|0.9051|0.9182|0.9448|0.9804|0.9708|0.9457|0.9944|0.9879|0.9739|0.9764|0.946
C49G7.4	157|276|324|327|738	0.9375|0.9|0.9259|0.9459|0.9286
C49H3.11.1	12|131|263|628|683|716|718|719|833	0.9706|0.95|0.9922|0.9782|0.9193|0.9231|0.9634|0.9868|0.9294
C49H3.11.2	6|125|257|622|677|712|713	0.9333|0.9048|0.9728|0.9741|0.9255|0.9266|0.962
C49H3.3.1	93|314	0.92|0.9298
C49H3.8	1118	0.9
C49H3.9	1067	0.9286
C50B6.2	1073|1235|1611	0.9524|0.9167|0.9483
C50B6.3b	1031|1032	0.9091|0.9091
C50B8.2	791	0.9
C50B8.3	119|801	0.9118|0.9074
C50B8.5	288	0.9231
C50C3.8	789|1006|1438|1439|1441|1442|1677	0.9362|0.9348|0.9178|0.9429|0.961|0.9388|0.925
C50D2.5	335	0.9565
C50D2.7	754|1030|1297	0.9375|0.9091|0.931
C50F2.3	1439	0.9
C50F4.1.1	333|552|618|1257	0.9259|0.9211|0.9167|0.9429
C50F4.1.2	523|1162	0.9|0.9167
C50F4.11	1064|1065|1529|1968	0.9231|0.9231|0.92|0.9
C50F4.13.1	177|191|242|378	0.9173|0.9727|0.9205|0.9565
C50F4.14b	743|869|918	0.9429|0.9|0.9574
C50F4.16	114|712|714|822|1096|1278|1356|1362	0.9032|0.9286|0.9355|0.913|0.9508|0.9429|0.9608|0.9091
C50F4.5	129|174|476	0.9752|0.9101|0.9373
C50F4.7	266|431	0.9259|0.9343
C50F4.8	119|203|275|878|1047	0.9362|0.9688|0.9157|0.9286|0.9178
C50F7.10.2	311|463|1013|1352|1532	0.92|0.9231|0.9|0.9091|0.9259
C50F7.5	472	0.9032
C51E3.7a	152|308|336|427|577|584|638|744|1066|1174|1177|1253|1583|1592|1904|1908|1923|1935|1946|2092|2119|2128|2193|2196|2282|2307|2327	0.929|0.9355|0.9759|0.976|0.9291|0.9257|0.9194|0.915|0.9105|0.9444|0.9931|0.9697|0.9753|0.9597|0.9493|0.9474|0.903|0.94|0.9261|0.9346|0.9048|0.9618|0.9011|0.9151|0.9532|0.9345|0.9216
C51E3.7c.1	1171|1334|1447|1577|1586|1940|2276	0.9048|0.9459|0.9118|0.9333|0.9048|0.9|0.9455
C51E3.7c.2	152|335|426|743|1173|1176|1252|1339|1582|1591|1903|1907|2127|2281|2306|2326	0.9375|0.9474|0.95|0.9512|0.9167|0.981|0.9545|0.9027|0.9694|0.9167|0.9115|0.9541|0.9623|0.96|0.9275|0.907
C51E3.9a	394|444	0.9048|0.9167
C51F7.1a	297|1093|2070|2218|2274|2354|2771|2861|2959|2961|3008|3094|3095|3252	0.9167|0.9375|0.9492|0.9464|0.9512|0.9062|0.9388|0.9459|0.95|0.9412|0.9167|0.9|0.9216|0.9394
C52B9.4	175	0.9048
C52D10.11	379|381|457|690	0.9231|0.9|0.9189|0.9832
C52E12.3.1	242	0.9259
C52E12.4	3381	0.9048
C52E4.1	265|372|446|602|640|766|1037|1068	0.9459|0.9733|0.9059|0.9091|0.9723|0.9669|0.9115|0.9231
C52E4.3.1	267|428|547|614|717	0.9167|0.9737|0.9242|0.9565|0.918
C52E4.4.1	383|418|547|873|1237|1350|1394	0.9506|0.9474|0.9245|0.9038|0.9615|0.9062|0.931
C52E4.4.2	1368	0.9167
C52E4.6a.1	394|723	0.9091|0.92
C53A3.2	60|941	0.95|0.9231
C53A5.1.1	195|355|358	0.9539|0.9154|0.9582
C53A5.1.2	195|358	0.9622|0.9497
C53A5.1.3	187|350	0.9545|0.939
C53A5.17	797	0.9
C53A5.3	1462	0.9487
C53B4.4a	3328	0.9
C53B4.5	195|407|553	0.9184|0.9062|0.9307
C53B7.3a	48|122|146|481|526|599|616|620|632|723|789	0.9259|0.9042|0.9253|0.9012|0.9848|0.9535|0.984|0.9365|0.9944|0.9147|0.9907
C53B7.3b	323|326|710|867	0.9|0.9|0.9459|0.9167
C53B7.3d.1	168|572|662|678|835	0.92|0.9048|0.9|0.9474|0.9333
C53B7.3d.2	143|523|613|629|786	0.9077|0.9688|0.9265|0.9813|0.973
C53B7.4	91|194|301|304|334	0.9714|0.9141|0.9405|0.9073|0.9871
C53C11.2	249|251|272	0.9091|0.9149|0.9444
C53C11.3	3324	0.9091
C53C9.2.1	1565|1648|1772	0.9412|0.9231|0.9091
C53C9.2.2	1648	0.9259
C53D5.6	71|72|124|765|1561|2164|2168|2694|2783|3065|3067|3069|3609	0.9|0.9167|0.931|0.9091|0.9|0.9091|0.9286|0.9286|0.931|0.902|0.9333|0.9394|0.9394
C53H9.1.1	139|210|236|249|362	0.9383|0.9732|0.9109|0.9986|0.956
C53H9.1.2	137|208|234|247	0.9462|0.9552|0.9018|0.9877
C53H9.2a	763|811|919|1465|1550|1592|1594|1595	0.9051|0.9464|0.9112|0.963|0.9663|0.9265|0.9387|0.9307
C54A12.1	1924	0.92
C54A12.4	599|602	0.9|0.9143
C54C6.1.2	253	0.9107
C54D1.1	2579	0.9167
C54D10.1	99|100|112|376	0.9318|0.9608|0.9375|0.9444
C54D10.10	58|397	0.9259|0.9231
C54D10.3	45|174|340|343|450|584	0.942|0.9851|0.953|0.9417|0.9551|0.9448
C54D2.2	208	0.9286
C54E4.2a.1	156	0.9091
C54F6.14.2	491|506	0.907|0.9
C54G10.3b	334	0.9231
C54G10.4b.2	608	0.9032
C54G4.1a	421|498|1003|2254|2362	0.9286|0.9355|0.9286|0.9024|0.92
C54G4.1d	418|421|498|866|1003|1299|1440|1662|1812|1903|2230|2338|2580|2820	0.9333|0.9474|0.931|0.9333|0.9556|0.92|0.9118|0.9583|0.9143|0.9|0.9024|0.931|0.931|0.9
C54G4.5	230	0.9167
C54G4.8	312|327|706|708|923|946|1230	0.9452|0.9091|0.9537|0.9485|0.9524|0.92|0.9167
C54H2.3	1253	0.9048
C54H2.5.1	124|139|153|542|1202	0.9412|0.9167|0.925|0.9167|0.9268
C55A6.12a	223|437|572	0.913|0.9143|0.9615
C55A6.2b	775|778|1155|1218|1220|1437|1655|1657|1858|1900|1931|2315	0.9268|0.9444|0.9167|0.92|0.9375|0.9394|0.9231|0.913|0.9032|0.913|0.9318|0.9091
C55A6.7	366	0.9
C55A6.9	552	0.9167
C55B7.4a	67|397|481|652|803|904|906|1090|1258|1310|1311	0.9286|0.9351|0.931|0.9242|0.9021|0.9493|0.9749|0.9748|0.9878|0.956|0.9318
C55B7.8	598|890	0.913|0.92
C55C2.5a	1629	0.9048
C55C3.5a	740|1106|1771	0.9|0.9231|0.9355
C55F2.1b	446|824|890|944|1857|1882	0.9091|0.9692|0.9412|0.9259|0.913|0.9459
C55F2.2	279	0.9231
C56A3.2a	262	0.9322
C56A3.2b	222|262|420|469|530	0.9286|0.9096|0.9294|0.9211|0.9394
C56A3.4a	808|813	0.9444|0.9318
C56A3.6d.1	1219	0.92
C56C10.10	40|653|927	0.9|0.931|0.92
C56C10.13a	183|216|689|837|1288|1821|2577	0.9394|0.9|0.931|0.9286|0.9556|0.9091|0.92
C56C10.3.1	500|768|819|849|953|1044|1096|1098|1124|1328|1332	0.9231|0.9778|0.9681|0.9661|0.9769|0.9804|0.9375|0.9615|0.934|0.925|0.9756
C56C10.3.2	535|626|914	0.9|0.9444|0.9091
C56C10.7a.1	1320	0.9167
C56C10.8.1	175|186|317|551|589|630|657|754	0.9953|0.9322|0.9412|0.9778|0.9904|0.9286|0.985|0.9778
C56C10.8.2	151|527|565|633|730	0.9792|0.9375|0.9817|0.9675|0.9
C56G2.1b.1	2358|3044	0.913|0.913
C56G2.1e	2923|3493	0.9048|0.9091
C56G2.6a.1	617|903|1009|1012|1042|1120|1217|1312	0.9649|0.9292|0.9658|0.988|0.9195|0.9042|0.9388|0.9855
C56G2.6a.2	507|613|616|821|916	0.9111|0.9|0.9592|0.9|0.92
C56G2.6b	281|567|673|676|976	0.9348|0.9252|0.939|0.9728|0.9808
C56G2.7a	91|293|318|412|573|923	0.9091|0.9|0.9091|0.9286|0.9048|0.931
C56G7.1	174|496|581	0.9333|0.9342|0.9286
CC4.2	210|267|342|364|513|518|597|599	0.9451|0.9118|0.9085|0.9259|0.9608|0.9643|0.9806|0.9718
CD4.2	237|813	0.9|0.9091
CD4.3.1	104|106|267|270|276|373|394	0.9545|0.9211|0.9444|0.9091|0.9|0.9167|0.9211
CD4.4	75|242|399|401|408|504|639|737|739	0.9|0.9107|0.9412|0.9434|0.9333|0.9355|0.925|0.9048|0.9048
CD4.6	55|233|314|691|878	0.9138|0.9487|0.9245|0.9286|0.9483
cTel55X.1a	360	0.9062
D1005.3.1	1107	0.92
D1007.12	44|283|512	0.9208|0.9971|0.9436
D1007.14	416|832	0.9143|0.9429
D1007.18	119	0.9048
D1007.5a	1221|1547	0.9|0.9
D1007.6	167|259|261|514	0.9461|0.9113|0.9358|0.9342
D1009.4a	30|38|734|740|880|932|941|981|994	0.9623|0.9041|0.9712|0.93|0.9574|0.9|0.9643|0.9444|0.9429
D1014.3.1	408|486|1347	0.9355|0.963|0.9231
D1022.4.1	507|732|848	0.9355|0.9062|0.9362
D1022.4.2	682|798	0.95|0.9362
D1025.4	39|58|85|181|197	0.9663|0.9965|0.9735|0.9903|0.9749
D1025.6	32|51|78|174|190	0.9839|0.9861|0.9477|0.9664|0.9338
D1025.7	146|162|191	0.9829|0.9738|0.907
D1025.8	51|78|174|190|219	0.9861|0.9474|0.9857|0.9773|0.9118
D1025.9	23|146|162|191	0.9592|0.9434|0.9512|0.9048
D1037.3.1	230|280|341|373|483|578	0.9543|0.9022|0.913|0.913|0.9344|0.9286
D1037.3.2	213|324|466	0.97|0.9306|0.9355
D1037.4.1	158|205|680|751|960|962|978	0.9649|0.9341|0.9481|0.9375|0.9016|0.9483|0.9574
D1046.5a	1080|1111	0.9286|0.9062
D1053.1	658	0.9
D1053.3	244	0.9
D1054.10	298|428|451|496	0.9434|0.9341|0.9379|0.9
D1054.11	44|285|511|514|562|564|698|737|767|797|842|902	0.9266|0.9|0.9084|0.9091|0.9074|0.9832|0.9597|0.9298|0.9494|0.9753|0.975|0.9556
D1054.15a.1	225|1463	0.92|0.9048
D1054.15a.2	349|1402	0.9091|0.9032
D1054.18a	156	0.9412
D1054.2.1	329|712|715|739|819	0.9091|0.9149|0.92|0.9175|0.931
D1054.3a	277|412	0.9|0.9259
D1081.2	767|906	0.9189|0.9355
D1081.7	60|958|1312	0.9|0.9|0.9259
D1081.8	1103|1397|1778|2161|2252|2461	0.913|0.9444|0.9429|0.9487|0.9487|0.9032
D1086.1	299	0.9032
D1086.10a	572	0.9167
D1086.11b.1	357|432|482|599|841	0.9091|0.9286|0.9275|0.95|0.9189
D1086.12a.1	675|710	0.9487|0.9118
D1086.12a.2	223|675|710	0.9091|0.9167|0.9333
D1086.12b.1	155|157|616|651	0.9062|0.9091|0.9623|0.9167
D1086.12b.2	155|157|616|651	0.9111|0.9024|0.9362|0.9149
D1086.6	406	0.9048
D2005.2	27|274|762	0.9052|0.9817|0.9211
D2005.3	122|270|280	0.9362|0.9375|0.901
D2007.1	53|63	0.9362|0.9091
D2007.4	238|347	0.9348|0.9167
D2007.5.1	841	0.9
D2007.5.2	786|1221	0.9318|0.9167
D2013.2.1	427	0.9
D2013.2.2	740	0.9
D2013.6.1	1009	0.9048
D2013.7	140|170|238|423|498|543|897	0.9211|0.9831|0.9826|0.9247|0.981|0.9429|0.9067
D2013.8a	1422|3395	0.9091|0.9048
D2013.9.1	1116|1861|2131|2194|2239	0.913|0.9412|0.9024|0.9091|0.9167
D2023.2a.1	499|700|858|1197|1228|1379|1663|1910|2221|2224|2368|2435|2466|3303|3307|3397|3577|3885	0.913|0.9512|0.9744|0.9688|0.9492|0.9649|0.9091|0.913|0.9574|0.9429|0.9268|0.932|0.9552|0.9143|0.913|0.9813|0.9341|0.9091
D2023.2a.2	743|1082|2106|2320|2351|2756|3282	0.9355|0.9|0.9|0.9|0.9189|0.9062|0.9636
D2023.7	198|708|1116	0.9826|0.92|0.9184
D2024.5a	98	0.9231
D2024.6.1	447|760|871|1030	0.9057|0.9062|0.9429|0.9167
D2024.6.2	447|760|871|1030	0.9091|0.9|0.9355|0.9167
D2024.8	176|228|332|479|652	0.9118|0.9318|0.9474|0.931|0.9388
D2030.12	252	0.9
D2030.2a.1	304|1952	0.925|0.9
D2030.2a.2	1907	0.9062
D2030.4	177	0.9083
D2030.5	74|111|793	0.9074|0.942|0.9057
D2030.6	148|502|1161|1811|1950|2152	0.9259|0.9|0.902|0.9091|0.9091|0.9459
D2030.8.1	793|1583	0.9|0.9231
D2062.6	193	0.9
D2063.3a	147|320	0.9348|0.9054
D2085.4	99|676|680|1493|1906|3022	0.9091|0.913|0.9167|0.9|0.913|0.9091
D2085.7a	506	0.9048
D2089.1a	339|866|1153|1490|1497	0.92|0.913|0.9268|0.913|0.9556
D2092.2	352|589|770|961|964	0.9|0.9|0.9394|0.9|0.9259
D2096.2a	577|706	0.9608|0.9348
D2096.8	194|369|371|454|1084	0.9545|0.9412|0.9429|0.9583|0.9385
D2096.9.1	45|113|125|170|280	0.9143|0.9333|0.9231|0.9167|0.9189
DC2.3b	107|754|964	0.9091|0.9512|0.913
DH11.2.2	210|274|373|1301|1362	0.9452|0.9167|0.9|0.9364|0.931
DY3.1	19|182|183	0.9524|0.971|0.9315
DY3.2.1	283|495|724|863|897|1107|1154|1504|1737|1740|1824|1898|1974|2135	0.9643|0.9574|0.9048|0.925|0.9057|0.9412|0.9231|0.901|0.9467|0.963|0.9048|0.9118|0.92|0.9565
DY3.2.2	1682	0.9167
DY3.6	957|1481	0.9524|0.9375
DY3.7	1742|1743|1927	0.9|0.9|0.9
E01A2.1b	275|714|833	0.9286|0.92|0.9048
E01A2.6.1	252|542|599|733	0.9167|0.9048|0.913|0.9
E01G4.3a.1	191|508	0.9535|0.9
E01G4.3c.2	227|271	0.9091|0.9444
E01G4.5	259|464|818	0.9024|0.9167|0.9091
E01G6.2	270|573|757	0.9167|0.92|0.9062
E01H11.3	179	0.92
E02A10.1	412|1318|1386	0.9143|0.9091|0.9268
E02A10.4	204|391|541|560	0.925|0.9125|0.9|0.9268
E02C12.13	146|226	0.9512|0.9355
E02H1.1.1	132|136	0.9333|0.9375
E02H1.7	253|550|752|1262|1520|1584|1617	0.9091|0.9167|0.9434|0.9535|0.9394|0.9|0.9333
E02H1.8	71|74	0.9231|0.913
E03D2.1	259	0.9537
E03D2.2a	266|326|477|703	0.9121|0.9333|0.9714|0.9333
E03H4.10	185|275|315|537|555|558|564|677|803|1232	0.9394|0.9455|0.9756|0.9302|0.9464|0.9464|0.9074|0.94|0.956|0.9355
E03H4.8	1528	0.9091
E04A4.5	738	0.9
E04A4.7.1	836|870|882|935|995|996|1035|1038	0.986|0.9793|0.9565|0.9333|0.9801|0.9814|0.9792|0.9426
E04A4.7.2	217|251|316|376|377|416|419	0.9856|0.9809|0.9268|0.9866|0.9913|0.9648|0.9368
E04A4.7.3	172|206|331|332|371|374	0.9727|0.9816|0.9834|0.9844|0.9742|0.9319
E04A4.8	380|549	0.9022|0.9588
E04D5.1a.1	748|1508|1523	0.9231|0.9688|0.918
E04F6.3	267|268|364|400	0.9111|0.925|0.9535|0.9
E04F6.5a.1	95|1134|1524	0.9211|0.9|0.9333
E04F6.6	190|573|1245|1367|1566|1598	0.9091|0.9048|0.9|0.9556|0.9647|0.9333
E04F6.8	383	0.9286
E04F6.9	71|353|358|359	0.9026|0.9714|0.9386|0.9714
EEED8.10a	1576	0.9091
EEED8.16	1019	0.9
EEED8.7a	130|372|586	0.913|0.9167|0.9091
EEED8.9	1289|1892	0.9062|0.9091
EGAP4.1	248	0.9
F01D4.4.3	137|139|421|602|847|878|880|1000|1136|1333|1423	0.916|0.9037|0.9322|0.9164|0.9897|0.9774|0.9903|0.9474|0.9565|0.9779|0.9769
F01D5.5	110|246|281	0.9091|0.9474|0.9333
F01F1.10b	1000	0.9048
F01F1.12a.1	443|839|909|1079|1140	0.9837|0.9506|0.981|0.9826|0.9628
F01F1.12a.2	568|964|1034|1204|1265	0.9613|0.9692|0.9662|0.9765|0.927
F01F1.2.1	393	0.9091
F01F1.3	271|738|741	0.9259|0.9048|0.9545
F01F1.4.1	550|673	0.9048|0.9
F01F1.6.1	175|309|1143|1659|1730|1920	0.931|0.9143|0.907|0.9302|0.9167|0.9118
F01F1.7	1568	0.9048
F01F1.8a.1	405|993|1239|1249|1252|1339|1341|1435|1608|1709|1742	0.9467|0.9315|0.9286|0.931|0.9048|0.9333|0.9062|0.9|0.9425|0.962|0.9444
F01F1.9a	119|155|683|686|1179|1268|1455|1458|1459|1526|1541	0.9459|0.913|0.9459|0.9412|0.9118|0.9211|0.9394|0.9636|0.95|0.9388|0.9167
F01G10.1.1	355|510|513|516|568|693|875|996|1085|1182|1186|1230|1380|1410|1446|1448|1575|1713|1731|1740|1803	0.9677|0.9836|0.9583|0.9444|0.9158|0.9481|0.972|0.967|0.9189|0.9147|0.9512|0.9348|0.9|0.962|0.907|0.9318|0.9231|0.9495|0.9643|0.95|0.9722
F01G10.1.2	489|1782	0.9048|0.9286
F01G10.7	716	0.9
F01G10.8b	285|287|450	0.9268|0.9167|0.913
F01G12.5b.2	4969|4973	0.9333|0.9231
F01G4.1	2157|2508|3010|3017|3020|4081|4143|4185|4267|4405	0.92|0.9|0.913|0.9048|0.9118|0.9259|0.9|0.925|0.92|0.9231
F01G4.2a	315|329|595|597|598|649	0.9383|0.9565|0.9318|0.9577|0.9434|0.9398
F01G4.5	238|347|573|742	0.913|0.9231|0.9167|0.9268
F01G4.6a.2	32|33|399|443|455|458|657|730|814|859|920|1267|1293	0.9111|0.9027|0.9715|0.9937|0.9636|0.9499|0.9808|0.9264|0.9826|0.9942|0.9412|0.9222|0.9332
F01G4.6a.3	32|399|443|455|458|657|730|814|859|920|1179|1267|1293	0.9078|0.9614|0.9722|0.9565|0.9373|0.9785|0.9127|0.9737|0.9954|0.9511|0.9091|0.9284|0.9439
F01G4.6b.2	1188|1233|1294|1667	0.9091|0.9677|0.931|0.9462
F01G4.6b.3	1233	0.9143
F02A9.1	493	0.9048
F02A9.2a	28|29|31|55|57|346|593|631	0.9224|0.9858|0.9869|0.9941|0.9816|0.9928|0.9848|0.9476
F02A9.3.1	287|448|470|568|580|582|645	0.9064|0.9322|0.9214|0.9347|0.9292|0.9206|0.9211
F02A9.3.2	203|299|419|431	0.951|0.9111|0.9247|0.9481
F02A9.4a.1	996|1783|1962	0.9091|0.931|0.9487
F02A9.4b.1	576|877|1064	0.9091|0.9091|0.931
F02D10.1	198|222|348|364|365|554|617|698|740	0.9245|0.9286|0.913|0.9062|0.942|0.9048|0.9091|0.9318|0.9074
F02D8.5	25|86|534|551|583	0.9057|0.9535|0.9429|0.9048|0.9643
F02E8.1.1	125|314|538|545|924	0.9651|0.9696|0.9394|0.9266|0.9137
F02E8.1.3	102|291|1001	0.9192|0.9774|0.9344
F02E8.3	183	0.9333
F02E9.10c.1	1377	0.9091
F02E9.5a.1	198|599	0.9804|0.9714
F02E9.7	78	0.913
F02E9.9b	1344	0.9048
F02G3.1a	2033	0.92
F07A11.2a.2	2240	0.9
F07A11.3	1844	0.9167
F07A11.6d.1	1594	0.9048
F07A5.5	183|589	0.9048|0.92
F07A5.7a.1	329|1301|1879|2632	0.9259|0.9394|0.913|0.9024
F07A5.7a.3	329|504|624|641|651|1301|1304|1543|1656|1757|1809|1921|2150|2177|2632|2717|2905	0.9846|0.94|0.9733|0.9167|0.9865|0.9886|0.913|0.9048|0.9216|0.9474|0.9583|0.913|0.9583|0.925|0.9617|0.9789|0.9412
F07A5.7a.4	329|504|624|651|1065|1301|1543|1656|1757|1797|1809|1921|2150|2177|2434|2632|2717|2905|3005	0.9733|0.9062|0.9524|0.957|0.9206|0.9825|0.9231|0.9221|0.9223|0.9|0.9462|0.9062|0.9286|0.9167|0.9636|0.965|0.9815|0.9322|0.9134
F07C3.4	1574|2156|2882|4299	0.9259|0.9091|0.913|0.9412
F07C3.9	91	0.9057
F07C4.7	564	0.9
F07C6.3	296|352|583|585|652|793|796|854	0.925|0.9362|0.9806|0.9333|0.9057|0.9474|0.9487|0.931
F07D10.1	35|570|574	0.9764|0.9335|0.9115
F07D3.2	57|59|61|602	0.9157|0.9219|0.973|0.9
F07E5.5	212|370|563|596|810	0.9091|0.9429|0.9318|0.9286|0.9333
F07F6.8	226|434	0.95|0.9474
F07H5.10	954	0.92
F08B1.1e.2	1443|1686|1971|2343	0.931|0.9091|0.9167|0.9118
F08B12.4a	135|138|195|198|237|261|335|337|358|367	0.9697|0.9886|0.9794|0.9937|0.9118|0.9801|0.9459|0.9225|0.9145|0.9878
F08B12.4b.1	135|138|195|198|237|261|335|337|367|396	0.9765|0.9669|0.9848|0.9934|0.9333|0.9809|0.9583|0.9375|0.9701|0.9103
F08B4.5	1442	0.9048
F08B4.7	146|506	0.9375|0.9032
F08B6.1	149	0.9048
F08B6.2	191	0.9
F08B6.3	408|725|821	0.9167|0.9167|0.931
F08B6.4a.2	1254	0.9
F08B6.4b	540|613|1229|1255	0.9688|0.9818|0.9435|0.9509
F08C6.6	469|613|615|617|709|973	0.9275|0.9048|0.9231|0.95|0.9216|0.9565
F08C6.7a	657	0.9
F08D12.3	76|559|689	0.9|0.931|0.9362
F08F1.7	1688|1826	0.9091|0.9143
F08F1.8	277|379	0.9333|0.9211
F08F3.3.1	371|752|1135	0.9432|0.9615|0.9508
F08F3.3.2	334	0.9143
F08F3.4	386	0.9048
F08F3.7	374|1264|1364	0.9167|0.9583|0.9091
F08F8.10a.1	978|1090|1271	0.9259|0.9231|0.9062
F08F8.2	39|1078	0.9286|0.9032
F08F8.7.1	93	0.9048
F08F8.7.2	86|147|492	0.9438|0.9464|0.9091
F08F8.9a.1	643|943|1441	0.9474|0.9|0.9167
F08G12.8	481	0.9412
F08H9.7	689|861	0.92|0.9355
F09B12.3	1100|1604	0.9231|0.9167
F09B9.1a	1133|2010	0.9474|0.9459
F09B9.2a	128|1318|1656|1965|1976|1994|2580|2691	0.9032|0.9394|0.9655|0.9091|0.9091|0.9459|0.9677|0.9455
F09B9.3	958|1298	0.9375|0.9512
F09B9.4	598	0.9091
F09C3.2	374|586|953	0.9318|0.9231|0.9545
F09D1.1	1427	0.9048
F09D12.1	213|419|420|424|515	0.9062|0.9032|0.9821|0.9824|0.9178
F09E10.7c	327	0.9459
F09E10.8a	2232	0.9
F09E5.1	1664|1928	0.9032|0.9091
F09E5.11	28|502|630	0.9|0.913|0.9231
F09E5.13	837	0.9
F09E5.14	321|412	0.9444|0.9375
F09E5.15a.1	294|386|567|772	0.9462|0.9756|0.9142|0.9077
F09E5.15b	280|355|447|628|833	0.9074|0.9592|0.9268|0.9191|0.914
F09E5.15c	234|712	0.9333|0.9217
F09E5.16	65|299	0.92|0.9286
F09E5.17	35|174|299	0.913|0.9231|0.913
F09E5.3	210|648|772|1003	0.9455|0.9231|0.9615|0.925
F09E5.7.1	273|556|726|880	0.9091|0.9259|0.9231|0.9211
F09F3.6	1150|1180	0.9368|0.9062
F09F7.2a.1	71|306|413	0.9048|0.9048|0.9259
F09F7.2a.2	46|71|80|82|306|413|415|594|657|871	0.9755|0.971|0.9601|0.9649|0.9963|0.9186|0.9836|0.963|0.9818|0.958
F09F7.4a.1	464	0.92
F09F7.6	152|154|181	0.9224|0.9636|0.9181
F09F7.7a	151|167|465|804|806|940	0.9778|0.9341|0.943|0.9091|0.9167|0.9319
F09G2.2	161|443|647|650	0.9429|0.925|0.9298|0.9286
F09G2.8a	1589	0.92
F09G2.9	134|152|232|433|601|619|622|772|800|1046|1372	0.9118|0.9412|0.92|0.9565|0.931|0.9444|0.9355|0.9091|0.9245|0.9091|0.9231
F09G8.6	759|763	0.9091|0.9
F10A3.17	548	0.9524
F10B5.1.1	87|174|374|378	0.9779|0.9624|0.9303|0.9565
F10B5.1.2	69|156|181|356|360	0.9785|0.9493|0.9135|0.937|0.951
F10B5.8	1371	0.9048
F10C1.2a.1	147|328|627|764|795|797|807|1738|1766|1785|2001	0.9688|0.9412|0.9032|0.9167|0.9583|0.9|0.9091|0.902|0.9|0.9429|0.913
F10C1.2a.2	1731	0.913
F10C1.2b	194|375|567|842|1785|1832|1997	0.9661|0.9412|0.9091|0.9608|0.9|0.9683|0.9048
F10C1.7a	143|1015|1246|1759|1762	0.9057|0.9057|0.9091|0.9444|0.95
F10C1.7c	18|68|1385|1623|1674|1711	0.9556|0.92|0.9268|0.9091|0.9123|0.9216
F10D11.1.1	116|171|761	0.9492|0.9286|0.9385
F10D11.1.2	78|101|156	0.9231|0.9318|0.9688
F10D2.11	167|1674	0.9048|0.9355
F10D7.5a	2220	0.9
F10E7.5.1	168	0.9437
F10E7.5.2	165|215|279	0.9369|0.9091|0.9677
F10E7.6	362	0.9048
F10E7.7.1	18|131|140|287|346|382|385	0.9444|0.9778|0.9819|0.9951|0.9216|0.9306|0.9395
F10E7.7.2	124|133|186|280|339|375|378	0.92|0.9821|0.9058|0.9939|0.9022|0.9119|0.9258
F10E7.7.3	124|133|280|339|375|378	0.9286|0.9749|0.9949|0.9197|0.9188|0.933
F10E7.8a	1231	0.9286
F10E7.8b	2215|2636	0.92|0.9
F10E7.9	1101|1125|1904	0.9048|0.9302|0.9592
F10E9.1	572	0.9048
F10E9.3	426|1137	0.9259|0.9062
F10E9.5	114|637|639	0.9|0.9091|0.9259
F10F2.1	7622|7624|7731	0.9412|0.92|0.9394
F10G2.1.1	128	0.9394
F10G2.1.2	128|577|715	0.9667|0.9348|0.9619
F10G2.3	350|1178	0.9118|0.9259
F10G7.1.1	330|388|802|1651|1750|2120	0.9231|0.9239|0.9065|0.975|0.9255|0.9412
F10G7.1.2	1634|1684	0.913|0.9167
F10G7.10a	5956	0.9048
F10G7.11	298	0.9219
F10G7.2	807|1027|1948|2422|2804|2805|2806|2944	0.9048|0.931|0.9167|0.9355|0.9355|0.9|0.9032|0.9394
F10G7.8.1	494|609|968|970|1342|1436|1594	0.9259|0.931|0.913|0.931|0.9245|0.9032|0.9
F10G7.8.2	758|1380	0.92|0.913
F10G8.5	11|462|680|684|687|734|819|826|867|1083	0.9688|0.9091|0.9355|0.9357|0.9231|0.9569|0.9394|0.9|0.9671|0.9845
F10G8.6	464|627|642|819|822|875|1028	0.9333|0.913|0.9211|0.973|0.9706|0.9286|0.9318
F11A10.2	461	0.9167
F11A10.5	102|415|417|875|1339|1635	0.931|0.9|0.913|0.92|0.9333|0.9286
F11A3.1.1	561|946	0.913|0.9231
F11A5.10.1	1254	0.9
F11A5.10.2	1151|1254	0.9565|0.9062
F11A5.9	64|124|394|466|546|712|1174|1259|1311|1358|1638	0.9127|0.9135|0.9758|0.9109|0.92|0.9167|0.9567|0.968|0.9457|0.9095|0.9588
F11A6.1a.2	439|447|1028|1862	0.9167|0.9118|0.9333|0.913
F11C3.3.1	2094|2277|3649|3897|4032|4099|5316|5429|5845|5884|5963|6033|6205|6206|6245	0.9459|0.9388|0.9259|0.9302|0.9365|0.9375|0.9492|0.9|0.94|0.908|0.9545|0.9231|0.9615|0.92|0.9455
F11C3.3.3	5225|5754|6028|6114|6154	0.9487|0.913|0.9048|0.9394|0.9429
F11C7.2	431	0.925
F11C7.3b.1	728|1034|1309	0.9048|0.9167|0.9259
F11C7.3b.2	78|639|945|1081|1220	0.9167|0.931|0.9118|0.9286|0.9355
F11C7.5.2	166|305|398|399|756|757|934	0.9074|0.9062|0.9481|0.9038|0.925|0.9444|0.9649
F11C7.7	118	0.9048
F11E6.3.1	221|245|257|287|289|478|539|698|701|802|860|863|1025|1037|1172	0.9524|0.9527|0.9845|0.9565|0.9205|0.9062|0.9394|0.9333|0.9355|0.9|0.9375|0.9333|0.9429|0.9143|0.9378
F11E6.3.2	152	0.9231
F11E6.5	219|714	0.9231|0.9111
F11E6.7	1182|2724	0.9|0.9
F11F1.6	499	0.9592
F11G11.10.1	216|286|357|358|387|514|953|969|970	0.9194|0.9412|0.9265|0.9592|0.9167|0.9574|0.9286|0.92|0.92
F11G11.11	83|199|296|565|857|858|874	0.9014|0.9286|0.9118|0.91|0.9552|0.9524|0.9672
F11G11.12	291|392|519|693|702|846	0.9091|0.9091|0.9444|0.9412|0.9583|0.9231
F11G11.2	42|144|254|395|539|541|551	0.942|0.9286|0.9044|0.92|0.9653|0.9468|0.9259
F11G11.3	234|360|439|524	0.9286|0.9|0.9355|0.9048
F11G11.5.2	23|108|111|280|324|452|477|546|678|711	0.9059|0.9118|0.9412|0.9009|0.9365|0.9364|0.9231|0.9355|0.9444|0.9691
F11G11.7	1958	0.9048
F11G11.8	178	0.9167
F11H8.1.1	913|1192|1193|1560|1563	0.9048|0.9167|0.9|0.9091|0.9048
F11H8.3	424|465|874	0.9167|0.9286|0.931
F12F6.1	69|880|1041|1044|2505	0.9259|0.9118|0.9545|0.9091|0.9048
F12F6.5a	3461	0.931
F12F6.6	2575|2924	0.9167|0.9231
F12F6.7.1	801	0.913
F13B10.2a.1	78|80|269|363|603|727|993|997|1051|1194|1205	0.9423|0.9895|0.9866|0.9426|0.974|0.9973|0.9106|0.9556|0.9199|0.9508|0.9435
F13B10.2a.2	78|80|269|360|363|603|646|727|997|1194|1205|1227	0.9294|0.984|0.9685|0.9273|0.9399|0.9697|0.9017|0.9979|0.9511|0.9171|0.9222|0.9834
F13B10.2c	853|1050	0.925|0.9118
F13B10.2d.1	435|705|913	0.9333|0.9362|0.9167
F13B10.2d.2	435|705|902|913|935	0.9697|0.9167|0.9091|0.9365|0.9355
F13B12.1	650|766|1120|1451	0.9211|0.9574|0.9388|0.9348
F13B12.5	467|549	0.9048|0.9167
F13B6.3	774|1065|1118|1304	0.9843|0.9423|0.9391|0.9
F13C5.1.2	355	0.92
F13C5.2	1112	0.9032
F13C5.6a	1376	0.9
F13C5.6b	1177|1410|1586	0.9|0.9|0.9048
F13D11.1	1276|1334|1335|1404	0.9412|0.9459|0.9189|0.9318
F13D11.3	20|92	0.92|0.9231
F13D11.4.1	338|419|662|877	0.9556|0.9211|0.9333|0.925
F13D12.2b	560|831|972|1010|1100|1104	0.9429|0.9474|0.9048|0.9091|0.94|0.9167
F13D12.3	981|987|990|1003	0.9062|0.9|0.913|0.9286
F13D12.4a.1	290|318|703|762|776|839|849|1042|1259|1465|1514|1612|1787	0.9032|0.9394|0.971|0.9784|0.931|0.9118|0.9803|0.9394|0.9565|0.9258|0.9231|0.9041|0.9107
F13D12.4a.2	283|311|696|755|769|832|842|845|1035|1252|1436|1458|1507|1605|1780	0.9375|0.9318|0.9864|0.9873|0.9412|0.9483|0.9883|0.9172|0.9474|0.9789|0.9076|0.9564|0.9659|0.9103|0.9595
F13D12.4a.3	83|560|652|711|725|788|798|991|1208|1414|1463|1736	0.908|0.9091|0.977|0.9873|0.9412|0.9211|0.9829|0.9143|0.9322|0.9336|0.9149|0.9268
F13D12.7a.1	607|1488|2334	0.9048|0.9048|0.9167
F13D12.7a.2	467|632|1509|1513|1660|1665|1770|2105|2359	0.9048|0.9|0.9429|0.931|0.9|0.913|0.9|0.9091|0.92
F13D12.7a.3	1960|2274	0.9231|0.9
F13D12.8	507	0.9
F13E6.1	324|341|535	0.945|0.9586|0.939
F13E6.4	109|306|1077	0.9231|0.9429|0.95
F13G11.1b.1	927|929|1195|1277|1402|1473|1567|1574	0.9487|0.9535|0.913|0.9464|0.9574|0.9412|0.9167|0.9677
F13G11.3	272	0.9028
F13G3.11	303|313|448	0.9286|0.9|0.9048
F13G3.4	165|240|264|351	0.9286|0.9138|0.9143|0.9535
F13G3.5a.2	397|916	0.931|0.9048
F13G3.6	621	0.9091
F13G3.9	168|299	0.9048|0.9459
F13H10.2a	576|801	0.931|0.9444
F13H10.6a.2	118|156|335|353|380	0.9552|0.913|0.974|0.9107|0.9091
F13H10.8a.1	44|177|181|252	0.9487|0.9143|0.9688|0.9091
F13H10.8a.2	25|158|162	0.9104|0.9143|0.963
F13H6.1b.1	2797	0.9167
F13H6.3	420|1061	0.9231|0.9231
F13H8.7	17|154|329|332|428|457|971	0.9313|0.902|0.989|0.9898|0.9184|0.963|0.9009
F14B4.2a.2	171	0.9091
F14B6.2	1606	0.9048
F14B8.2	113	0.9259
F14B8.6	464|848|852|1027	0.9|0.9394|0.931|0.913
F14D12.5	1461|1532	0.9|0.92
F14E5.2a	282|389|1866|2405|2668|2719	0.9048|0.9048|0.9143|0.9211|0.9455|0.9375
F14E5.5	91|1046|1062	0.931|0.9189|0.9211
F14F11.2	72|75|82|345|349|396	0.9538|0.96|0.9024|0.922|0.9673|0.9064
F14F4.3	146|882|1292|1957|2415|2910|2926|2928|3375|3587|4279	0.9412|0.92|0.92|0.9091|0.92|0.9091|0.9153|0.9333|0.9|0.9348|0.9388
F14F7.1	509|582|789|994	0.9|0.9437|0.9012|0.9462
F14H12.4a	1058|1125|1128|1290|1545	0.92|0.9231|0.9038|0.9459|0.9535
F14H8.1a	148|213|332|419|420|1094	0.9259|0.9355|0.913|0.9|0.95|0.9091
F15A2.1b.1	195|436|871	0.9231|0.902|0.918
F15A4.5	145	0.9062
F15A4.6	312	0.9477
F15B10.1a	160|371|383|652|655|792|907|988|1064	0.9333|0.9508|0.9032|0.9474|0.9359|0.9167|0.9333|0.9571|0.9737
F15B9.1	68|71|74|289|452	0.9847|0.9412|0.9302|0.9718|0.9104
F15B9.10a	97|264|1014|1137	0.9375|0.9231|0.9189|0.9286
F15C11.1	2324|2437|2662	0.9375|0.9062|0.9512
F15C11.2a.1	320|511|692|752|860|922|942|1521|1656	0.931|0.9545|0.9524|0.9048|0.9062|0.9206|0.9677|0.9062|0.913
F15D3.6	260|415|594|640|817	0.9121|0.9636|0.931|0.9194|0.9333
F15D3.7	69|204|489|491|669|721|785|843	0.9038|0.94|0.9074|0.9412|0.9062|0.9551|0.9083|0.9528
F15D4.2	77|114|173|291|375|384	0.9474|0.9375|0.9744|0.9231|0.9643|0.9388
F15D4.8	40|299	0.9403|0.9231
F15E6.3	83	0.913
F15H10.1.1	419|554|662|764|952	0.95|0.9692|0.9444|0.9535|0.9111
F15H10.2	389|513|524|533|632|725|734|812|916|921|922	0.931|0.9216|0.9535|0.9538|0.9444|0.9231|0.9|0.913|0.9118|0.9143|0.9333
F16A11.1a	379	0.9048
F16D3.2.1	2380|2396|2399|2489	0.9048|0.9032|0.9048|0.9
F16H11.5	978|1396|1986	0.9333|0.9259|0.9048
F16H6.1	559|1009|1012|1523|1533	0.9167|0.9|0.9091|0.9032|0.9231
F16H6.10	609|736|993|999	0.913|0.9091|0.92|0.9091
F17A9.4	429|634|786|1074|1356	0.9|0.9048|0.9286|0.95|0.9048
F17C11.11a	196|267|464|466|695	0.9412|0.9556|0.9259|0.9091|0.9714
F17C11.17a.1	620|1171	0.9|0.9259
F17C11.2.1	264|296|334|337|339|439|447	0.905|0.9627|0.9508|0.9879|0.986|0.9577|0.9504
F17C11.2.2	319	0.92
F17C11.4b	840	0.9
F17C11.8.1	476|478|558|1335|1574	0.92|0.9535|0.9091|0.9492|0.92
F17C11.9a.1	274|714|821|964|1154	0.9455|0.9882|0.9273|0.9|0.9297
F17C11.9a.2	74|230|312|670|777|1110	0.9|0.9496|0.9263|0.9898|0.9222|0.9342
F17C11.9b.1	648	0.913
F17C11.9b.2	650|1090	0.974|0.9
F17C8.2	242	0.9
F17C8.4.1	116|456|651|652	0.9318|0.9474|0.9444|0.9394
F17C8.9	425	0.9048
F17E9.4	159	0.9831
F17H10.2a	326	0.9574
F18A1.2d	365	0.9
F18A1.5	92|987|1244|1347|1422|1749	0.9474|0.913|0.9429|0.9167|0.9167|0.9394
F18A1.7	491|494|524|631|731	0.9091|0.95|0.9333|0.9024|0.9
F18A11.3	336|339	0.9444|0.9556
F18A12.8a	224	0.92
F18C5.10.1	316|664|706|1015|1021|1346|1362	0.9655|0.9848|0.9369|0.9459|0.9333|0.9623|0.9077
F18E2.2	348|1000	0.9024|0.9024
F18E2.3	1355|1818|3302	0.9|0.9231|0.9032
F18E3.11	362	0.9048
F18E3.13	243	0.9221
F18E3.7a.1	968	0.92
F18E9.2b	461	0.9
F18G5.6	254|570|690|812	0.9634|0.9333|0.9286|0.9524
F18H3.3a.1	2101|2445	0.9091|0.9091
F18H3.4	942	0.9
F19B6.1d	1187|1988|2264	0.9032|0.9111|0.9091
F19B6.2a.1	347|646	0.9259|0.9512
F19C7.1	127|521|533|536|539|769	0.9459|0.9032|0.9|0.9398|0.9565|0.9383
F19F10.9	2145	0.9091
F19H8.1a	142|1284|2725|2780|2783|3111	0.9167|0.92|0.9459|0.9474|0.9474|0.9459
F19H8.2	933	0.9444
F20A1.1	114|168|237|303|369|372	0.9218|0.9434|0.9657|0.9545|0.9938|0.9565
F20A1.10	107|222|272|333|335|373|390	0.9259|0.9259|0.9577|0.9111|0.9437|0.9394|0.9048
F20B6.2	59|245|475|986|1089|1290|1292|1418|1497	0.9158|0.9609|0.9694|0.9758|0.9831|0.9875|0.95|0.9545|0.9051
F20C5.6	276|473|670	0.9565|0.9268|0.9
F20D1.1	50|499|511|545|546	0.9091|0.9375|0.9333|0.913|0.9091
F20D1.10.1	369	0.9143
F20D1.3	229|548|714|1010|1424	0.9167|0.9062|0.9091|0.9302|0.9434
F20D1.6	2070|2091|2092|2270	0.9259|0.9231|0.931|0.931
F20D1.9	254	0.9
F20D12.12	88|91	0.9167|0.9
F20D12.5.2	137|237|445	0.9091|0.9394|0.9091
F20D6.11	1328|1533|1539|1655|1679	0.931|0.9143|0.9118|0.931|0.9429
F20D6.4d	321|694|765	0.9|0.9107|0.95
F20E11.17	39|43	0.9355|0.9
F20G2.2	344|380|438	0.9268|0.9091|0.9286
F20H11.1	893|1254|1273	0.9062|0.9|0.9259
F20H11.3	225|389|428|467|776|958|1010|1150|1152|1155|1156|1157	0.9408|0.9074|0.958|0.9375|0.9216|0.9929|0.9464|0.9784|0.9713|0.9435|0.9646|0.9684
F20H11.5	131|233|653	0.9167|0.9048|0.9091
F21A3.11	247	0.9143
F21C10.10.1	298|478|535|563|721|862|867|913|936|1011	0.9448|0.9886|0.994|0.9025|0.9776|0.9188|0.9191|0.9795|0.9742|0.955
F21C10.10.2	38|218|275|461|607|653|676|751	0.95|0.963|0.9813|0.9602|0.9216|0.9738|0.9655|0.959
F21C10.3	724	0.9048
F21C10.8a	1016	0.9231
F21C10.8b	47|656|827	0.9231|0.9574|0.9111
F21C3.3.1	334|518|688	0.9048|0.9205|0.95
F21C3.5	492	0.9362
F21D12.1c.1	465|511|513|1011	0.9444|0.9333|0.9577|0.9167
F21D12.1c.2	415|463|1303	0.9211|0.9048|0.92
F21D12.1e	465|511|513	0.9375|0.9|0.931
F21D12.3.1	1052|1073|1212	0.931|0.9118|0.9091
F21D5.1	1330	0.9167
F21D5.5	613|830	0.913|0.9091
F21D5.6	226|850	0.9091|0.9091
F21D5.7	464|880|1544	0.913|0.9474|0.9259
F21F3.1.1	258|343|834|908|1141	0.9234|0.9595|0.9459|0.9245|0.9615
F21F3.6	433|494|638|650|700|704|801|803|1101	0.9444|0.9298|0.9167|0.9167|0.9551|0.9211|0.9087|0.9864|0.932
F21F3.7	283|516|576	0.931|0.9|0.913
F21F8.3.1	155|478|481|494|519|548|584|661|750|791|801|1123|1176	0.975|0.975|0.9863|0.9516|0.9318|0.9524|0.9722|0.9701|0.988|0.9545|0.9722|0.9179|0.9763
F21F8.3.2	145|468|471|484|740|791|1166	0.9362|0.9479|0.9524|0.9242|0.973|0.9|0.971
F21F8.7	40|62|121|172|569|588|802|806|883|884|892|943|944|945|982|1046|1206|1217	0.9248|0.9563|0.9924|0.9097|0.9249|0.9736|0.9679|0.9865|0.9251|0.9561|0.9958|0.9129|0.9694|0.9591|0.9734|0.9205|0.9226|0.9153
F21H11.3.2	1096|1237|1240	0.9|0.9|0.9231
F21H12.6	2816|2975|3105|3503|3560|3889|4095|4275|4276	0.9|0.9333|0.9|0.9535|0.9024|0.9259|0.9459|0.9286|0.913
F22A3.6a	345|465	0.9348|0.913
F22A3.7	416	0.95
F22B5.1	204	0.913
F22B5.10	695	0.9062
F22B5.2a	472	0.9091
F22B5.4.2	395	0.9
F22B5.7	2399	0.9048
F22B5.9	248|588|780|1075|1101|1176|1358|1362	0.9429|0.9048|0.9444|0.9016|0.9474|0.9286|0.9706|0.9143
F22B7.9	57|96|97|222|367|410|487|615|877	0.931|0.96|0.94|0.9|0.9231|0.9231|0.9771|0.9683|0.9196
F22B8.7.1	412|862	0.9167|0.9333
F22D6.2	8|253|496|500|601|604|665|743	0.9307|0.9849|0.9145|0.9549|0.9873|0.9806|0.9153|0.9429
F22D6.3a	64|96|178|208|517|778|781|822|1004|1261|1720	0.918|0.9608|0.9211|0.9107|0.9359|0.9091|0.9565|0.9429|0.931|0.9688|0.9286
F22D6.4.1	460	0.9367
F22D6.6	1571|1752	0.9091|0.9355
F22E10.3	3198	0.913
F22F1.1	565|638	0.9474|0.9103
F22F4.4	14|39|232|762|770	0.9459|0.9412|0.9265|0.9306|0.9286
F22F7.1a	10|88|662|984|1135|1137|1170|1197|1200	0.9444|0.907|0.973|0.9552|0.9565|0.9474|0.9011|0.9398|0.9535
F22H10.3	238	0.9167
F23A7.4.2	180|213	0.9|0.9048
F23B12.4a.1	456|956	0.9167|0.9048
F23B12.5.1	220|327|479|752|777|825|837|840|1011|1131|1335|1657|1659	0.9077|0.9057|0.9286|0.9167|0.9437|0.9661|0.9394|0.9118|0.9518|0.9663|0.9223|0.9524|0.91
F23B12.5.2	1512	0.9048
F23B12.7.1	2165|2169	0.9091|0.92
F23B2.11.1	1440|3231	0.9048|0.9048
F23B2.13a	21|27	0.9111|0.9048
F23B2.5a	31|33|263|422|425|567|585|598|601|607	0.9474|0.9192|0.9507|0.9474|0.9394|0.9021|0.9223|0.9035|0.9794|0.985
F23B2.5b	18|20|376|379|555|561	0.9423|0.9596|0.9672|0.9333|0.9899|0.9746
F23B2.6	208|213|555	0.9474|0.9483|0.9348
F23C8.4.2	639|642	0.9259|0.9167
F23C8.5a.1	1245	0.9298
F23C8.6	364|666	0.95|0.9559
F23D12.3	333	0.9048
F23F1.4.1	339	0.913
F23F1.5	601	0.9167
F23F1.8a	586|1184	0.9348|0.9118
F23F1.8b	481|1079	0.94|0.9556
F23F12.6.1	17|20|124|220	0.9394|0.913|0.9286|0.9355
F23H11.1	336|503|753	0.9167|0.913|0.9091
F23H11.3.1	221|542|608	0.9|0.9583|0.9487
F23H11.5	83|293	0.9043|0.967
F23H11.9b.1	74|341|643	0.913|0.9|0.9
F23H12.1.1	20|50|71|184|463|479	0.9545|0.9167|0.9|0.973|0.9|0.9362
F23H12.2	52|193	0.9706|0.9302
F23H12.4a	75|77|104|356|478|554|713|763|1007	0.94|0.9355|0.9333|0.9245|0.9388|0.9412|0.9072|0.9052|0.9589
F23H12.8	243|313|322|324	0.9756|0.9393|0.9817|0.9487
F25B3.1	779|905|2946	0.9|0.9|0.9048
F25B3.6	67|1151|1586|1837|1852|1894	0.9444|0.9189|0.9286|0.9429|0.9423|0.9545
F25B4.1.1	1227	0.9
F25B4.2	1377	0.92
F25B4.5	996|1000|2093	0.9231|0.9286|0.95
F25B4.7.2	73|142	0.92|0.95
F25B4.9	519|669|807	0.9385|0.9423|0.92
F25B5.3b	164|193|225|1235|1351	0.9375|0.9062|0.9375|0.9286|0.9355
F25B5.4a.1	467|548|682|695|1004|1460|1835|2372|2600	0.9631|0.9867|0.9277|0.9915|0.9718|0.9706|0.9422|0.9302|0.9385
F25B5.4a.2	517|1282	0.9048|0.9048
F25B5.5	965|1146|1353	0.9375|0.9|0.9111
F25B5.6a	1063|2068	0.9167|0.9048
F25B5.6b	1833	0.913
F25C8.4	322|366|1550	0.9091|0.9286|0.92
F25D1.1a	429|511|778|882|1771|2132	0.931|0.963|0.9643|0.942|0.9149|0.9157
F25D7.1.1	263|474	0.973|0.9434
F25D7.2.1	85|615|819|839|854|856|1375	0.9211|0.9429|0.9|0.9038|0.9286|0.9355|0.9
F25E5.8a.1	552|886|1041|1070|1120|1122|1248	0.9348|0.933|0.9086|0.9072|0.9785|0.9643|0.9524
F25E5.8a.2	603|605	0.931|0.913
F25F2.2	13324	0.9
F25F8.2	66|1180|1189|1427	0.9|0.9355|0.9259|0.913
F25G6.8	282	0.9091
F25H2.10	89|103|388|568|708|730|867|870|873|903|906|909	0.9177|0.9974|0.9186|0.9535|0.9524|0.9784|0.9858|0.999|0.9992|0.9955|0.9974|0.9817
F25H2.11	174|456	0.9014|0.9204
F25H2.4	193|195	0.925|0.9535
F25H2.5.1	222|275|408|410|590|629	0.907|0.9327|0.9231|0.9536|0.9949|0.9318
F25H2.5.2	275|408|410|590|629	0.9375|0.9469|0.9676|0.9888|0.9455
F25H2.5.3	179|232|365|367|547|586	0.9615|0.9487|0.9605|0.9808|0.9925|0.9239
F25H2.5.4	235|368|370|550|589	0.9471|0.949|0.9604|0.9945|0.9703
F25H2.8.1	56|174|565|666|868|1002|1035|1086|1098|1187|1432	0.9216|0.9512|0.9048|0.925|0.92|0.9592|0.9|0.9333|0.9459|0.963|0.9429
F25H2.9	178|521|746|823|826	0.9254|0.9444|0.9342|0.9091|0.9672
F25H5.1b	1791|2220	0.913|0.9062
F25H5.1i	2578	0.9167
F25H5.3a	19|417|576|1380|1383|1453|1456|1497|1602|1805|1881|1893|1948	0.9216|0.9535|0.913|0.9059|0.9753|0.9667|0.957|0.9286|0.94|0.9643|0.9718|0.9012|0.973
F25H5.3c.1	1760|1763|2112|2188|2200|2255	0.9444|0.9211|0.9535|0.9333|0.925|0.9583
F25H5.4a.1	483|602|612|855|1158|1256|1407|1512|1514|1637|1689|1737|2118|2147|2276|2305|2418|2428|2578|2685	0.9701|0.9541|0.9344|0.9197|0.9575|0.9165|0.9402|0.969|0.9859|0.9672|0.922|0.9402|0.9225|0.9861|0.9369|0.9|0.9908|0.9458|0.9897|0.9078
F25H5.4a.2	483|602|612|855|1158|1256|1407|1512|1514|1579|1637|1737|2118|2147|2276|2305|2418|2428|2578|2685	0.9862|0.9412|0.9345|0.9187|0.9443|0.9238|0.9579|0.9609|0.995|0.9087|0.9652|0.9435|0.9158|0.9876|0.9353|0.9048|0.9926|0.9557|0.99|0.9356
F25H5.4a.3	483|602|612|855|1158|1407|1512|1514|1637|1689|1737|2118|2147|2276|2305|2418|2428|2578	0.9814|0.9559|0.9036|0.9286|0.9644|0.9411|0.9673|0.9951|0.9686|0.9294|0.9367|0.9198|0.9883|0.9437|0.9231|0.9916|0.9585|0.983
F25H5.4b.1	436|555|565|808|1111|1209|1360|1465|1467|1590|1602|1690|2100|2229|2365|2371|2381|2531	0.9365|0.9375|0.9085|0.9305|0.9395|0.9264|0.9231|0.9805|0.9843|0.9694|0.9|0.9391|0.9716|0.9241|0.9017|0.981|0.934|0.9737
F25H5.4b.2	1075|1324|1429|1431|1496|1554|2064|2335|2345|2495	0.9318|0.92|0.9492|0.9556|0.9091|0.9293|0.9649|0.9565|0.9286|0.9375
F25H5.4b.3	777|1080|1329|1434|1436|1559|2069|2198|2334|2340|2350|2500	0.9355|0.9608|0.9237|0.9577|0.9756|0.966|0.9545|0.9226|0.913|0.9672|0.9583|0.9733
F25H5.4b.4	405|524|777|1080|1329|1434|1436|1501|1559|1611|1659|2040|2069|2340|2350|2500	0.9231|0.9024|0.9054|0.9348|0.9386|0.9677|0.9747|0.9|0.9728|0.9243|0.9242|0.92|0.9515|0.9714|0.9066|0.9692
F25H5.4b.5	1033|1282|1387|1389|1512|2022|2293|2303|2453	0.9302|0.9091|0.9242|0.9524|0.9457|0.9483|0.9524|0.9256|0.9429
F25H5.6.1	321	0.9231
F25H5.8	174|177|247|263	0.913|0.9524|0.931|0.9286
F25H8.5b	390|1068|1083	0.9394|0.9048|0.9231
F25H8.5d	92|761|824	0.9167|0.9|0.9231
F25H9.5a.1	626|884|1506|1508|1629|1680	0.92|0.92|0.9574|0.9661|0.9167|0.9211
F25H9.5a.2	1403|1427|1429	0.9091|0.931|0.9118
F25H9.7a	452	0.9333
F26A1.19	180	0.9032
F26A10.1	348	0.9022
F26A3.1	289|424|609|929|1011	0.9035|0.913|0.9231|0.9192|0.9107
F26A3.4	187|231|383	0.9385|0.9542|0.9057
F26B1.2a	404|621	0.9|0.9
F26B1.3	8|958|975|1293	0.9231|0.95|0.9286|0.9038
F26B1.8	143	0.92
F26D10.10	1120	0.9167
F26D10.3.1	56|170|381|401|451|502|553|914|1284|1351|1352|1374|1376|1784|1816|1817|1913	0.9435|0.9593|0.918|0.9036|0.9515|0.9892|0.9909|0.9764|0.9429|0.9459|0.949|0.985|0.9111|0.9515|0.9554|0.9371|0.9036
F26D10.3.2	56|170|381|401|451|502|553|676|914|1141|1282|1284|1351|1352|1374|1784|1816|1817|1913	0.9243|0.9128|0.9406|0.9141|0.9565|0.9947|0.9954|0.9091|0.9777|0.9057|0.9157|0.9538|0.9379|0.9384|0.9653|0.9495|0.9539|0.9466|0.909
F26D10.9a	320|1191|1362|1588|1808|1820|1923	0.9798|0.9333|0.9412|0.9444|0.9048|0.9126|0.9245
F26E4.1	307|1212|1637|1638|1751|1829|1973	0.9048|0.9362|0.9425|0.9286|0.9118|0.9091|0.96
F26E4.11	1289|1430|1432	0.9444|0.9412|0.9
F26E4.4	643	0.9
F26E4.6	84|108|132|135|177|178|269|271	0.9261|0.9814|0.9474|0.9781|0.9505|0.9727|0.995|0.9184
F26E4.8a	181|263|384|464|520|649|837|840|892|1161|1388	0.9114|0.9318|0.92|0.9531|0.9552|0.9701|0.913|0.9524|0.9111|0.9647|0.9
F26E4.8b	183|265|386|466|522|651|839|842|1116|1163|1390|1499	0.9027|0.9153|0.9394|0.9438|0.9798|0.9792|0.9048|0.9683|0.9022|0.9701|0.9423|0.9483
F26E4.9.1	130|243|292|476	0.9259|0.9559|0.9783|0.9665
F26E4.9.2	262|446	0.968|0.9805
F26F12.1	108|265|304|653|815	0.9548|0.9291|0.9074|0.957|0.9879
F26F12.3a.1	511|546|1145|1863|1905|2875|2928|2955|2960|3339|3469|3471|3588	0.9259|0.9375|0.9286|0.9333|0.913|0.9167|0.9143|0.931|0.9167|0.9167|0.9302|0.9355|0.9048
F26F4.10a.1	546|553|965|1067|1680	0.9091|0.9444|0.9487|0.9667|0.9167
F26F4.10a.2	1055	0.913
F26F4.11	232|233|324	0.9333|0.9118|0.9394
F26F4.12	640	0.9091
F26F4.4.2	632|728|1464	0.913|0.913|0.9
F26F4.6	963	0.9091
F26G1.2b	126|317|357|381|505	0.9048|0.92|0.9231|0.9107|0.9231
F26G1.7	173	0.9167
F26G5.9	355|816|915|920|1015|1299|1302|1833|2647	0.9167|0.913|0.9259|0.9091|0.9091|0.9444|0.95|0.9444|0.9333
F26H11.2i	4209|4306|4347|4349	0.9538|0.9048|0.913|0.95
F26H11.2k	4353|4355	0.9464|0.9412
F26H11.5.1	159|238	0.95|0.9118
F26H9.2	726|804|1027|1033|1636	0.9167|0.9091|0.9286|0.9091|0.913
F26H9.5	44|68|71|288|606|647	0.92|0.9231|0.9375|0.9487|0.9167|0.96
F26H9.6	455|491|607|621|667|669|670|870|872	0.9727|0.9167|0.9062|0.9643|0.963|0.9714|0.9286|0.9592|0.9535
F27B10.1a	153	0.9
F27C1.1	827	0.9048
F27C1.2a	59|539|542|641|653|793|805	0.9318|0.9065|0.9524|0.9718|0.931|0.9813|0.9189
F27C1.6.1	1311|1375|1388	0.9|0.9048|0.9231
F27C1.7a.1	490|867|920	0.9574|0.9333|0.9091
F27C1.7a.2	202|204|491|868|921	0.95|0.9107|0.9299|0.9614|0.9027
F27C1.7a.3	524|839	0.9333|0.9286
F27C1.7a.4	155|444|821	0.9379|0.928|0.9692
F27C1.7a.5	120|693|786	0.9375|0.9032|0.9512
F27C1.7b	497|783|874	0.9065|0.9024|0.9444
F27C1.8	86|428|641	0.9231|0.9735|0.9574
F27C8.4a.1	306	0.9077
F27C8.6.2	830|943|1105	0.9375|0.9375|0.9
F27D4.1	16|175|258|382|387|649|994	0.9333|0.9649|0.975|0.9487|0.9552|0.9091|0.97
F27D4.2b.1	381	0.9
F27D4.4a	360	0.9556
F27D4.5	947|1219|1247|1291|1295	0.9|0.9|0.913|0.96|0.9032
F27D4.7	137	0.9
F27D9.1a	398|577|1583|1958|2380|2529	0.92|0.9|0.9091|0.9167|0.9184|0.9
F27D9.5.1	77|294|557|605|755|1120|1593|1619|2138|2293|2336|2424	0.939|0.9091|0.9318|0.9623|0.9778|0.9412|0.92|0.9444|0.9808|0.9167|0.9524|0.9167
F27D9.5.2	2098	0.9524
F27E5.1	1101|1183	0.9375|0.9583
F28A10.6	323|1033	0.9286|0.92
F28A12.3	541	0.9
F28A12.4.1	394|449|505|604	0.9|0.9535|0.931|0.9714
F28A12.4.2	417|473|572	0.9245|0.9333|0.9655
F28B3.10	535	0.92
F28B3.6.1	488|491	0.9|0.9394
F28B3.7a	2498|3265	0.913|0.9286
F28C1.3c	866|3046	0.9091|0.9355
F28C6.5	484	0.9
F28C6.7a	104|106|203|264|291|308|317|392	0.929|0.9653|0.9137|0.9905|0.948|0.9112|0.9702|0.9759
F28C6.7b	264	0.9412
F28C6.7c	264|291|322	0.9545|0.94|0.931
F28D1.5.2	652	0.9048
F28D1.7a.1	101|125|196|214|290|403|404	0.9465|0.9944|0.9555|0.9761|0.9512|0.9298|0.9177
F28D1.7a.2	86|110|181|199|275|388|389	0.9328|0.991|0.9412|0.9624|0.9469|0.937|0.935
F28E10.2b	195	0.9062
F28F8.2	54|70|73|89|152|155|426|546|575|576|691|694|911|1067|1382|1393|1433|1579|1793|1929	0.9267|0.9458|0.9363|0.9198|0.9922|0.9559|0.9753|0.9738|0.9432|0.9126|0.9477|0.9972|0.9895|0.935|0.9615|0.9254|0.9543|0.982|0.9037|0.9968
F28F8.5a	299	0.9
F28F9.3	202	0.9429
F28G4.1	1142	0.9143
F28H1.2	174|603|613	0.9483|0.9263|0.9415
F28H1.3.1	2316|2474	0.9167|0.913
F28H1.3.2	796|2304	0.9048|0.9
F28H6.1a	1817	0.9
F28H7.8	445|819	0.9231|0.9048
F29B9.11.1	146	0.9672
F29B9.11.2	144|153|362	0.9062|0.9045|0.9333
F29B9.4a	1324	0.9048
F29B9.6.2	470|1020	0.9333|0.9259
F29B9.8.1	848|1440	0.9048|0.9231
F29C4.2	162	0.9039
F29C4.6.1	284	0.913
F29C4.7a.1	1152|1702	0.9|0.9394
F29C6.1a	53|213|390|620|623	0.9014|0.9785|0.9103|0.9826|0.95
F29D11.1	12715|12943|13918	0.9231|0.9167|0.9062
F29D11.2	2039|2399	0.9062|0.913
F29F11.1	1061|1089|1128	0.9556|0.9091|0.9074
F29F11.6	97|592|910|980|1444	0.9455|0.9487|0.9286|0.9286|0.9231
F29G6.3a.2	1486|1979|2059	0.9444|0.9333|0.9091
F29G9.4a	109	0.9286
F29G9.5	178|248|895|967|1289	0.9091|0.9048|0.9342|0.9348|0.9231
F29G9.6b	1257|1259|1607|1643	0.9118|0.9|0.95|0.9
F30A10.10	4090	0.9259
F30A10.3.2	633	0.913
F30A10.6	470|577|1365|1449	0.9259|0.931|0.9062|0.9375
F30A10.9	159|161|631|688|803	0.9161|0.9718|0.9375|0.9178|0.931
F30B5.1	921|923	0.9167|0.9259
F30F8.3	174|176|494	0.9091|0.9394|0.9118
F30F8.8.2	1120	0.9259
F31C3.1.1	52|497|519|692	0.9845|0.9048|0.9877|0.9524
F31C3.1.2	37|52|497|519|692	0.9535|0.9643|0.9151|0.9908|0.9195
F31C3.4	557	0.9048
F31D4.2	1394|1561|1855|1856	0.9048|0.9231|0.9355|0.913
F31D4.3.1	818|1101|1465	0.9565|0.9231|0.9057
F31D4.4	131	0.9333
F31D4.8	662	0.92
F31D4.9.1	12|63	0.9157|0.9688
F31D4.9.2	63|327	0.9828|0.9211
F31E3.1	736|866|914	0.9444|0.9375|0.9048
F31E3.3	761	0.9412
F31E3.5.1	27|97|136|169|268|283|354|445|647|883|954|1070|1344	0.9586|0.9249|0.9236|0.9416|0.9028|0.9184|0.9984|0.9756|0.9889|0.974|0.9474|0.9776|0.9728
F31E3.5.2	16|86|125|158|257|310|343|380|434|636|872|943|1059|1333	0.9615|0.928|0.9289|0.9384|0.9107|0.9123|0.9976|0.9146|0.9733|0.9863|0.9812|0.9624|0.9777|0.9617
F31E3.5.3	16|86|125|158|272|343|434|636|872|943|1059|1081|1333	0.9625|0.9191|0.934|0.9465|0.9146|0.9985|0.9743|0.9842|0.986|0.9671|0.9812|0.9107|0.9726
F31E3.6.2	141	0.9388
F31E8.2a	408|495	0.9231|0.9091
F31F6.4b.1	128|176	0.9167|0.9048
F31F6.6	646|1579|1707	0.913|0.9474|0.9259
F31F7.1a	709|827|869|932|1055|1178|1273	0.9667|0.9333|0.9|0.9459|0.9453|0.9684|0.9011
F32A11.1.1	23|277|562|793|990|1027|1080|1237	0.9459|0.9286|0.9189|0.9583|0.9315|0.96|0.9125|0.9091
F32A5.2b.1	341|467|1685	0.9|0.9167|0.9167
F32A5.3	642	0.9091
F32A5.4a.1	598|615|693|881|1183	0.9195|0.9091|0.9151|0.907|0.9435
F32A5.4a.2	230	0.913
F32A5.5a	288|885|888|921|928	0.9342|0.944|0.948|0.9437|0.9474
F32A5.5b.1	911|914	0.9359|0.9483
F32A5.5b.2	847	0.9062
F32A5.6	438|935	0.9167|0.9259
F32A5.7.1	96	0.9
F32A5.8.1	550	0.913
F32A5.8.2	360	0.9355
F32A7.5a	862|891|2224|2412|2536	0.9167|0.9091|0.9091|0.9167|0.9333
F32B5.6a	386|387|781|1052|1166|1168|1201|1203|1690|1692	0.95|0.9048|0.9302|0.9091|0.9298|0.9583|0.9747|0.9333|0.9|0.9429
F32B5.8a	151|174|392|479|525|954	0.9556|0.9805|0.9459|0.9245|0.9024|0.9358
F32B6.1	514|640|670|1213|1300|1345	0.9286|0.9|0.9429|0.9412|0.913|0.9615
F32B6.2.1	235|352|628|1258|1300|1342|1755|1776	0.9|0.9032|0.913|0.9032|0.9143|0.92|0.9048|0.9091
F32B6.3.2	698	0.9091
F32B6.5	354|555|570|894	0.9189|0.9231|0.9412|0.92
F32B6.8b.1	622	0.9259
F32B6.9	393	0.9
F32D1.10	2075	0.9231
F32D1.2	25|51|184	0.9775|0.9591|0.9728
F32D1.5a.1	265|781|1014|1166|1169	0.9714|0.913|0.9062|0.931|0.95
F32D1.5a.2	242	0.9062
F32D1.7	615	0.9091
F32D8.12a.1	128|347|936|948|1219	0.9014|0.9048|0.9483|0.9286|0.9506
F32D8.14a	836	0.9259
F32D8.5a	226	0.9167
F32D8.6	118|127	0.9863|0.947
F32D8.9	481	0.9388
F32E10.4	219|387|584|1243|1485|1579|2347|2433	0.9167|0.9273|0.9143|0.961|0.9394|0.9|0.9|0.9455
F32E10.6.1	1184|1292	0.9216|0.9545
F32G8.4	344|707|947|1299|1303|1315	0.934|0.92|0.9032|0.9425|0.9406|0.9211
F32G8.6	166|364|573|637|662|673	0.9358|0.9365|0.9688|0.9756|0.9198|0.9701
F32H2.4	50|853|871|890	0.9375|0.9|0.9259|0.95
F32H2.5	6798	0.9167
F32H5.1	278|591|592|942	0.9048|0.92|0.9|0.9167
F33A8.2.2	164|207|268|269|389|509	0.9565|0.9301|0.9828|0.9336|0.9158|0.9279
F33A8.3	227|667|688|777|813|824|826|909|923|928|1154	0.9227|0.9375|0.9653|0.9121|0.9062|0.9808|0.9822|0.9219|0.9061|0.9012|0.9302
F33A8.5	125|126|354|367|580	0.9018|0.9434|0.9592|0.956|0.9143
F33C8.3	353|356|359|657	0.9143|0.9615|0.9167|0.9167
F33D11.10	139|177|596	0.9|0.9231|0.9048
F33D11.11	114|733|734|835|957	0.9032|0.9589|0.9143|0.9655|0.9143
F33D11.8	74|115	0.9487|0.9138
F33D4.3	363|471	0.9333|0.9831
F33D4.4.1	531|535|795	0.9091|0.9615|0.9296
F33D4.5	1023	0.9138
F33D4.7	360	0.9444
F33D4.8	444|485	0.9062|0.9062
F33G12.6a	1793|2205	0.9286|0.931
F33H1.1a	1553	0.913
F33H1.3	400	0.92
F34H10.3.2	970|1140	0.9231|0.9048
F35B12.3	148|182|741|799|879	0.9766|0.9481|0.9444|0.9028|0.9024
F35B12.6	401|834	0.9333|0.913
F35B12.7.1	331|385|427	0.9368|0.9237|0.9145
F35B12.9	275|319|383|467|604|926	0.9048|0.9412|0.9286|0.9048|0.9114|0.9048
F35B3.5a	2932|3704	0.9091|0.9259
F35C11.1.2	149	0.9074
F35C11.5	901	0.913
F35C11.6	246	0.9167
F35C5.6.1	52|54|177|466|739|827|1052|1244	0.9708|0.9016|0.9429|0.9464|0.9747|0.9006|0.9756|0.9524
F35C5.6.2	52|177|466|739|827|935|1052|1244	0.9869|0.9184|0.9477|0.974|0.9275|0.9245|0.9783|0.9333
F35C5.8.1	664|749|779|1023	0.9167|0.9552|0.9683|0.9062
F35C5.8.2	603|688|718|962	0.902|0.9091|0.9643|0.9375
F35C8.5	305|479|481|682|873|876	0.9268|0.9143|0.9118|0.9111|0.9091|0.973
F35C8.6.1	658	0.913
F35D11.3.2	609	0.9
F35E12.6.1	979	0.913
F35F10.11	221|240|470	0.9355|0.9091|0.9091
F35F10.5	102|346	0.9091|0.913
F35G12.10.1	231|738|805|821|925	0.9091|0.9362|0.9661|0.9091|0.9286
F35G12.11.1	200	0.9394
F35G12.12	158|787|812|1013|1063	0.9091|0.9167|0.9375|0.95|0.9545
F35G12.1a.1	305|752|1301	0.9|0.9412|0.9487
F35G12.2.1	281|404|564|1034|1356	0.913|0.9483|0.9231|0.9688|0.9286
F35G12.2.2	400|1030	0.9388|0.9423
F35G12.2.3	868|1187|1190	0.9487|0.9333|0.9211
F35G2.1a.2	68|221|511|1122|1298|1432|1743|2301|2440|2450	0.9524|0.9|0.913|0.9565|0.9189|0.9|0.931|0.9286|0.9375|0.9231
F35G2.2	119	0.9048
F35H10.10	586|765|2293|3617|4228	0.9355|0.9333|0.9286|0.9143|0.9423
F35H10.4.2	893|1573|1577|2023|2645	0.9375|0.9024|0.9118|0.9302|0.9459
F35H8.3	1044|1409	0.9|0.9167
F35H8.5	954|1255|1257|1735|1958	0.9333|0.9444|0.9118|0.9091|0.9
F35H8.6.1	563	0.92
F36A2.2	323|1540	0.9|0.9412
F36A2.3	123|124|264|432|615	0.9143|0.9254|0.9412|0.9286|0.9608
F36A2.6	13|37|226|383|385	0.9408|0.9755|0.9883|0.9268|0.9811
F36A2.7	51|313|480|483|484|508|513	0.9|0.9943|0.9091|0.9091|0.9258|0.9497|0.9315
F36A2.8.2	145|226|303	0.9394|0.9|0.9167
F36A4.10	164|297|373|423|426	0.9286|0.9062|0.913|0.9583|0.9259
F36D1.7	178|334	0.913|0.9487
F36D3.9	142|721	0.9|0.9048
F36F12.6	392	0.913
F36F2.1a	466	0.9231
F36F2.1b.1	410	0.9
F36F2.2	380	0.9298
F36F2.3a	432	0.9
F36F2.4	414|703|897|931	0.9016|0.9524|0.9394|0.9667
F36H1.6	409|541|544|789|1184|1234|2040|2199|2212|2527	0.9016|0.9298|0.9143|0.9767|0.9107|0.9062|0.9231|0.9589|0.9506|0.9429
F36H12.1	113|348|533	0.974|0.9429|0.974
F36H12.7	95|119	0.9|0.9394
F36H2.2a	1642	0.9
F37A4.1.1	52|421|461|686|1096	0.9|0.9333|0.9286|0.9636|0.9091
F37A4.2.1	290	0.92
F37A4.8	3178|3179|3317	0.9394|0.9231|0.9048
F37A8.4	131|452	0.913|0.9208
F37A8.5	508|510|513|856	0.92|0.9167|0.9268|0.9589
F37B12.2	55|556|557|615|646|783|818|821|1000|1045|1506|1608|1865|1959|2039|2083|2084	0.9048|0.9524|0.9512|0.9091|0.9348|0.9032|0.9216|0.9565|0.9444|0.9|0.913|0.9091|0.9677|0.907|0.9062|0.9302|0.907
F37B12.3	696	0.9189
F37B4.2	963|1095|1566	0.907|0.9333|0.9091
F37C12.1	335|914	0.92|0.9512
F37C12.10	335	0.9
F37C12.13a.1	489	0.92
F37C12.2.1	676|992	0.9231|0.9
F37C12.3.1	117|218|297	0.9286|0.9664|0.9211
F37C12.3.2	196	0.9048
F37C12.4.1	159|298	0.9199|0.9622
F37C12.4.2	296	0.915
F37C12.7	1341|2184|2257|2519|2671	0.9091|0.9487|0.9189|0.9231|0.9254
F37C12.9.1	32|134|251|261|263|265|275|503	0.9972|0.9259|0.9815|0.9872|0.9852|0.983|0.9776|0.9628
F37C12.9.2	14|233|243|245|247|257|485	0.9619|0.9771|0.9855|0.987|0.9791|0.9617|0.9457
F37C4.5a.1	330|647|1428|1495|1691	0.925|0.9524|0.9048|0.9444|0.9167
F37C4.5a.2	137	0.9091
F37C4.5a.3	597	0.9459
F37E3.1	613|2606	0.9|0.9
F37H8.3a	136|392|594|707|725	0.9483|0.9444|0.9593|0.9375|0.9067
F37H8.5	148|247|305|902	0.9189|0.9759|0.9136|0.9259
F38A1.14	135|273|779|1133|1354	0.9444|0.9091|0.9048|0.9|0.9107
F38A3.2	135|205|326|353|387|390|413|534|647|893|945|1023|1043|1047	0.97|0.955|0.9492|0.925|0.9419|0.9722|0.9748|0.9512|0.9828|0.9733|0.9048|0.9348|0.9675|0.9219
F38A5.13	805|953|1010|1295|1691|1854	0.9|0.9375|0.9|0.9394|0.9062|0.9
F38A5.1a	380|630	0.9231|0.9
F38A5.1b.1	380	0.9048
F38A5.2b.1	727|1840	0.9333|0.9048
F38A5.3a	438|676	0.931|0.9259
F38A5.7	306|542|546	0.96|0.942|0.9231
F38A6.3a	58|69|760|1000|1016|1047|1144|1709|2059|2062|2113	0.9211|0.9429|0.9054|0.95|0.9459|0.9455|0.9048|0.9706|0.9649|0.931|0.9853
F38A6.3b	1715|2119	0.9394|0.9583
F38A6.3c	1440	0.9048
F38B2.4a	357|626|695	0.9333|0.9487|0.9655
F38B7.1b	1702	0.9091
F38B7.3	769	0.9394
F38E1.9	55|132|315|539	0.95|0.9231|0.9636|0.9048
F38E11.1	410|412|494	0.9847|0.9121|0.9631
F38E11.2	126	0.9576
F38E9.5.1	44|584|715|1133	0.96|0.9|0.9592|0.9483
F38E9.6	313	0.9286
F38H4.10	486|550	0.913|0.9032
F38H4.8a.1	589|1011	0.9|0.9
F38H4.9.2	45	0.9091
F38H4.9.3	1698	0.9231
F39B2.1	1946	0.9048
F39B2.10.1	1177|1240|1345|1575|1676	0.9643|0.9394|0.902|0.9118|0.9412
F39B2.10.2	1103	0.9091
F39B2.11	450	0.9259
F39B2.2.1	336|555	0.9189|0.931
F39B2.2.2	235|336|357|481|555	0.96|0.9302|0.9123|0.9333|0.9565
F39B2.3	788|875	0.9|0.913
F39B2.6.1	82|84|188|208|335|338|341|356	0.9873|0.9882|0.9429|0.993|0.9974|0.9975|0.9974|0.941
F39B2.6.2	70|72|93|176|196|323|326|329|413	0.9806|0.9859|0.9167|0.9118|0.9901|0.9846|0.9894|0.9895|0.9206
F39B2.6.3	70|72|176|196|323|326|329|344	0.976|0.9846|0.9412|0.9843|0.994|0.9767|0.9878|0.9268
F39G3.5a.1	485	0.9091
F39H11.2a	1821	0.913
F39H11.5	485|649|887|893	0.9302|0.9762|0.9143|0.92
F39H12.3	236|255|257|349|610|691	0.9057|0.9412|0.9565|0.9091|0.9444|0.9474
F39H2.1.2	69|448	0.9054|0.9524
F40A3.1	624	0.9608
F40A3.2	45	0.9452
F40A3.3a	485|715	0.9|0.9412
F40A3.3c	414	0.9355
F40A3.6	537|612|697	0.9038|0.9394|0.9091
F40E10.3	325|417|1123|1158|1159|1264|1316|1348	0.9424|0.9385|0.9429|0.913|0.9208|0.9388|0.9257|0.9286
F40E10.6.2	550|851	0.9167|0.9167
F40E10.6.3	851	0.913
F40F11.1	85|223|341|343|512	0.9985|0.992|0.9095|0.9493|0.9801
F40F12.5a	2526|2736|3078	0.907|0.9024|0.9574
F40F12.5b	2330	0.9091
F40F12.7.1	401|407	0.9091|0.9333
F40F12.7.4	127|163|406	0.9167|0.9167|0.9259
F40F4.2.1	372|477|654	0.963|0.9239|0.9732
F40F4.2.2	341|518	0.902|0.931
F40F4.3.1	124|151|245	0.95|0.9|0.9625
F40F4.4a	429|714|788|905|907	0.9394|0.9362|0.9149|0.9167|0.9167
F40F4.4b	429|768|905|907	0.9259|0.9259|0.9649|0.92
F40F4.6a	6089	0.9048
F40F4.6b	3704|5998	0.9259|0.9259
F40F8.10	107|222	0.9309|0.9641
F40F8.11a.1	255|790|829	0.9167|0.9259|0.9394
F40F8.4	322	0.9322
F40F8.5a.1	325|358|637|678|1042|1362|1364	0.9664|0.9079|0.9494|0.9496|0.9518|0.973|0.9452
F40F8.7.2	71|379	0.9091|0.9394
F40F8.9.1	73|425|428	0.9189|0.9355|0.9231
F40F9.1a.1	1147|1149	0.9231|0.92
F40F9.1b.1	1218	0.9048
F40F9.1b.2	1155|1157	0.9333|0.913
F40F9.2.1	249|348|354|435	0.9118|0.9091|0.913|0.9286
F40F9.6b.2	1965	0.9091
F40F9.7a	364|414|529|847|1126|1193|1421|1461	0.925|0.9048|0.9286|0.9318|0.9|0.9167|0.9189|0.9143
F40F9.7b.3	363|528|846|1192|1267|1420|1460	0.9167|0.9444|0.9138|0.9231|0.9259|0.9487|0.9286
F40G12.5	159|248	0.9405|0.962
F40G9.11	27|30|163|424|427	0.9565|0.9643|0.9512|0.9245|0.9487
F40G9.2	254	0.9048
F40G9.3	21|591	0.9211|0.9062
F40H3.1a	823|1608|1779|1883	0.931|0.9167|0.9333|0.9512
F41B4.1	1313	0.9048
F41B4.2b	91	0.9167
F41B5.2	809|1201	0.9167|0.9091
F41B5.9	480	0.92
F41C3.2	234|309|435|448|612|864|1214|1734	0.9149|0.9429|0.9254|0.9574|0.9494|0.9032|0.9167|0.9375
F41C3.3.1	32|102|114|183|193|268|343|467|524|594|955|1511|1644	0.9254|0.963|0.906|0.9133|0.9535|0.9796|0.9882|0.9402|0.907|0.9574|0.9677|0.9684|0.9563
F41C3.3.2	23|93|105|137|174|256|259|334|458|585|946|1001|1380|1528|1635	0.9032|0.9111|0.9101|0.9038|0.9184|0.9423|0.962|0.9823|0.9615|0.9434|0.9667|0.9091|0.9574|0.9167|0.944
F41C3.4	596	0.913
F41C3.5.1	251|374|452|631|1012	0.9487|0.9545|0.931|0.9535|0.9024
F41C3.5.2	421	0.92
F41C3.5.3	220|343|600	0.9|0.9|0.913
F41E6.13a	39|164|166|169|699|718|1016|1019|1296|1300|1513	0.9247|0.9474|0.9062|0.9355|0.913|0.9231|0.907|0.9024|0.9402|0.9412|0.9265
F41E6.13b	650|1019|1307|1311|1524	0.9091|0.9231|0.9211|0.913|0.92
F41E6.2	81|108|163|412	0.918|0.9|0.9211|0.9048
F41E6.4a	625|681|690|1317|1319|1754|1952|2181|3139|3241|3242|3244|3398|3734|3797	0.9143|0.9|0.92|0.9429|0.9167|0.95|0.9|0.9512|0.9231|0.9216|0.9385|0.907|0.9512|0.9167|0.9518
F41E6.5b.2	333|434|1032	0.9375|0.913|0.9429
F41E6.6.1	43|377|761	0.9595|0.9254|0.9394
F41E6.6.2	43|206|761	0.9677|0.9324|0.9062
F41E6.9	90|297|701	0.9138|0.9813|0.9655
F41E7.1	1279|1528	0.9048|0.9062
F41E7.4	164	0.9333
F41E7.7b	372	0.931
F41E7.8	35|185	0.9444|0.9192
F41F3.3	29|31|153|156|194|279	0.9231|0.9107|0.9432|0.9667|0.9027|0.9929
F41F3.4	524	0.9143
F41G3.1	259	0.9236
F41G3.10	33|36|129|192|363|736	0.9265|0.9412|0.9386|0.9684|0.9362|0.9375
F41G3.6	191	0.9167
F41G4.2b.1	197|931|1701	0.913|0.9091|0.9048
F41G4.8	164|450|660|808|816	0.9091|0.9565|0.9091|0.9268|0.9032
F41H10.4	1125	0.9048
F41H10.7.1	236|387|482|635|637	0.9792|0.981|0.9333|0.9048|0.9286
F41H10.7.2	216|367|462|617	0.9552|0.9753|0.9362|0.9593
F41H10.8	104|300|521|665	0.9897|0.9789|0.9243|0.9478
F42A10.1.2	1236|2292	0.9167|0.9524
F42A10.4a	1485	0.9048
F42A10.4b	2221	0.92
F42A10.7	183	0.9474
F42A6.6d	273	0.9167
F42A6.7a.1	1329|1331	0.9167|0.92
F42A8.2.1	138|441|565|706|731|880|891|917|920|948|1013|1090	0.95|0.95|0.9189|0.9545|0.9697|0.95|0.9375|0.9744|0.9259|0.9355|0.9022|0.9333
F42A9.2	2838|2856|2968|3165|3420|3558	0.913|0.9167|0.9|0.9355|0.9091|0.9189
[truncated: 2,991 more rows]

## Sheet: YA_5mC
Table S9 List of putative RNA modification sites identified with long reads.
Isoform	5mC site	5mC fraction
AC3.2	128|1102|1296	0.9459|0.9167|0.9487
AC3.5a.1	409|458|800|1447|1623|2609	0.9286|0.913|0.92|0.9032|0.9167|0.9231
AC3.7	810	0.9048
AH10.1	426|1645	0.9048|0.9091
AH6.5	291|399|401|408|438|858|1099|1509|1609|1790	0.9394|0.9474|0.9118|0.9048|0.9333|0.955|0.9568|0.9036|0.9796|0.9829
B0001.1a	161|629	0.9167|0.9661
B0001.2	310|790|791|1075|1439	0.9535|0.9302|0.9487|0.9344|0.9048
B0001.3b	433|963|1095	0.9355|0.9394|0.9111
B0001.4a	406|409|555|717|946|962|977	0.9487|0.9759|0.9118|0.9623|0.942|0.974|0.9474
B0001.5	1765	0.913
B0001.6.1	411|1697	0.9167|0.931
B0001.7b	2076	0.9167
B0001.8a	846	0.9394
B0024.1	73|761|926	0.9861|0.9062|0.916
B0024.10	133|137|227|638|848|1479	0.9302|0.9429|0.9167|0.9091|0.9032|0.913
B0024.11	236|1025|1160|1548	0.9259|0.9167|0.9592|0.9487
B0024.13	108|553|637|978	0.9189|0.9394|0.9048|0.9487
B0024.9a.1	402	0.9375
B0025.2.1	163|896|969|1479|1608	0.9348|0.9091|0.9091|0.9273|0.9032
B0025.2.2	1472	0.9
B0035.11	493|645	0.9375|0.9143
B0035.12.1	706|1403|1657|1792|1828|1855	0.925|0.931|0.9167|0.9474|0.913|0.9394
B0035.13.2	207|305	0.913|0.9394
B0035.14a.1	1349|1393|1514|1543|1544	0.9143|0.92|0.9333|0.9355|0.9167
B0035.1b	231|633	0.9714|0.9302
B0035.2	161|230	0.9412|0.9091
B0035.3	160|337|776	0.9595|0.9775|0.9028
B0035.4a.1	89|92|120|122|124|128|137|170|264|267|492|493	0.9|0.963|0.9655|0.9545|0.9512|0.9211|0.972|0.907|0.9881|0.9833|0.92|0.9298
B0035.4a.2	199	0.9487
B0035.5	137|192|193|439|441|901|904|1142|1638|1641|1735	0.913|0.9634|0.9444|0.9048|0.9221|0.9649|0.9535|0.9286|0.9398|0.9457|0.9167
B0035.6	758|1193|1834|1835	0.9487|0.9167|0.9216|0.907
B0041.2d	1707|2737	0.9429|0.9
B0041.4	73|104|194|331|333|446|522|781|961|963|1022	0.9225|0.9341|0.9924|0.9678|0.9964|0.9872|0.9869|0.9027|0.9326|0.9666|0.9474
B0041.5a	353|850|958|1093|1173|1505	0.9038|0.9048|0.9535|0.9355|0.9|0.9
B0041.8.1	584|586	0.9529|0.9635
B0205.10.1	483|484|503|505	0.9333|0.9412|0.9|0.9333
B0205.11	39|91|216|380|571|573	0.971|0.9|0.9589|0.9825|0.9506|0.9412
B0205.3.1	48|776|824|827|836	0.9577|0.9|0.9286|0.9286|0.9592
B0205.3.2	1237|1238	0.925|0.9375
B0205.6	807|837|849	0.9259|0.9|0.9512
B0205.7	331|492|1218|1255	0.9583|0.9167|0.9167|0.9333
B0205.9	1588	0.9355
B0207.4	396|738|954	0.9306|0.9167|0.954
B0207.6	810	0.9091
B0218.1.2	1472	0.9
B0218.2	1092	0.9
B0218.6a	156|675	0.9231|0.9048
B0218.7	1057	0.9091
B0222.5	107|497|945|960|1029	0.9167|0.9388|0.9444|0.9268|0.9355
B0222.6	323	0.9474
B0228.1	256	0.931
B0228.7.2	183|267|482|617|754	0.9429|0.9394|0.9054|0.9189|0.9559
B0238.10.1	927	0.9057
B0238.11	417|643|758|917|921	0.918|0.9829|0.9322|0.9155|0.9681
B0238.9	780|1210|1614|1622|1733|1892	0.9661|0.9429|0.9355|0.9245|0.9545|0.9143
B0240.4	100|244|264|490|772|935|1164|1326|1482|1609|1688	0.918|0.9286|0.9437|0.9167|0.925|0.9512|0.9344|0.9344|0.9661|0.9836|0.9512
B0244.2	424|713|2391	0.9091|0.9167|0.913
B0244.8	387|586|1064|1101	0.9487|0.9524|0.9658|0.9804
B0250.1	395|402|420|515	0.9884|0.9663|0.9239|0.9871
B0250.5	314|324|384|539	0.9355|0.935|0.9091|0.9032
B0252.5	329	0.9167
B0261.1	1128|1492|1894|1990|2152|2230|2302	0.9143|0.913|0.9487|0.9|0.9286|0.9231|0.9333
B0261.4b	322	0.9296
B0261.6a	397|498	0.9577|0.9412
B0261.7	526|777|1008|1011	0.9375|0.9613|0.9804|0.9
B0261.8	518	0.9091
B0272.3	126	0.9189
B0273.2.1	197|198|547|620|936|1265|1718	0.9474|0.931|0.92|0.9268|0.9184|0.9512|0.9143
B0280.10a	230	0.92
B0280.1a	148|531|635	0.9091|0.9286|0.9667
B0280.3.1	177|407|409|573|603|701	0.9714|0.9|0.9565|0.9694|0.9758|0.928
B0280.5	171|462|648|784|786|840|1027|1113|1339|1407|1441|1453|1455|1509|1530|1606	0.9647|0.9732|0.9832|0.978|0.9192|0.9831|0.9322|0.9904|0.9358|0.9093|0.9228|0.9666|0.9377|0.9618|0.9878|0.9206
B0280.8	904	0.913
B0280.9	78|684|1101	0.9394|0.96|0.931
B0285.3	487	0.9211
B0285.4.1	73|662|705	0.9091|0.9459|0.9231
B0285.4.2	662|705	0.9302|0.9524
B0285.5	578|635|1354|1697|1959	0.931|0.9375|0.9048|0.9231|0.9474
B0285.9.1	1193	0.9032
B0286.3	128|1307|1309	0.9429|0.9565|0.9286
B0286.4a.1	922|1425	0.9048|0.9286
B0303.15	144|217|296|538	0.9231|0.9421|0.925|0.9528
B0303.3.1	680|697|706|1094|1303	0.9512|0.9286|0.93|0.925|0.9355
B0303.3.2	275|660|677|686|790|1074	0.9048|0.9375|0.92|0.957|0.9333|0.9608
B0303.4.1	554|641|1181|2154	0.9167|0.9375|0.9|0.9429
B0303.9	515|698|811|1910|1911	0.9048|0.9167|0.9459|0.907|0.9231
B0304.2	264|688	0.9592|0.9688
B0310.5a	357|1403	0.9487|0.9333
B0334.1.1	318|325|444|495|549	0.9161|0.9531|0.95|0.927|0.9286
B0334.1.2	299	0.9048
B0334.11a	489|492|1031|1041|1367	0.9|0.92|0.9211|0.9333|0.9032
B0334.15	134|510	0.913|0.9
B0334.3a.1	802|1362|1761|1926	0.9556|0.9216|0.9032|0.9375
B0334.3b	677|1237	0.9|0.9091
B0334.4	110|525	0.9552|0.9444
B0334.5	430|432|674	0.92|0.9394|0.9286
B0336.10.1	301|405|426	0.9577|0.9554|0.9843
B0336.10.2	403|424	0.9494|0.969
B0336.10.3	403|424	0.9563|0.9832
B0336.13	116	0.9474
B0336.1a.1	262|1968|2104|2133	0.9259|0.9062|0.9259|0.9048
B0336.2.1	529|636|638|648|650|1001|1004|1007	0.9692|0.9432|0.963|0.9762|0.9416|0.9806|0.9279|0.9126
B0336.2.3	520|883|886	0.9231|0.9|0.931
B0336.5b	501|601	0.9355|0.9216
B0336.6.1	259|397|559|689|900|1124|1336|1429	0.932|0.9231|0.9688|0.9278|0.9242|0.9101|0.9394|0.931
B0336.6.2	1114	0.931
B0336.7a	37|436	0.913|0.913
B0336.8	59|245	0.9111|0.9667
B0348.6a.1	720|855|881	0.9468|0.912|0.913
B0348.6b.2	729|890	0.9101|0.92
B0350.2a	489|526|687	0.913|0.9024|0.9111
B0361.10.2	599	0.9333
B0361.2a	1208	0.9211
B0361.3.1	172|737|1157|1954	0.9286|0.9|0.9565|0.95
B0361.6	1305	0.9048
B0361.7.1	845	0.9211
B0361.8	621|820|1132	0.9231|0.9167|0.9245
B0361.9a	213	0.9
B0365.1	49|109|204|305|581|584|849|1545|1637|1690|1846|1895|1981|1996|2233|2493|2716|3154|3206|3210|3249|3252|3385	0.9062|0.9403|0.9062|0.9651|0.9032|0.9552|0.9268|0.9189|0.9341|0.9024|0.9231|0.9143|0.95|0.9157|0.9231|0.9189|0.9717|0.9293|0.9794|0.961|0.9167|0.9368|0.9639
B0365.3.2	668|670|796|1193|1327|1385|1440|2065|2137|2161|2164|2383|2485|2518|2576|2654|2753|3222	0.9615|0.9259|0.9333|0.93|0.9048|0.9333|0.9672|0.9206|0.9167|0.9565|0.9455|0.904|0.9683|0.9167|0.9322|0.9187|0.9839|0.9348
B0379.1a	138|155|479|494|689|699	0.9545|0.9348|0.92|0.9074|0.9048|0.9487
B0379.4a	1186	0.9024
B0379.7.1	271|325|391	0.9487|0.9048|0.9167
B0393.1.1	209|273|287|309|411|499|648	0.9832|0.9338|0.9033|0.989|0.9113|0.9111|0.9305
B0393.1.2	177|241|255|277|616	0.9618|0.9048|0.9078|0.9681|0.906
B0393.2.1	169|949|953|964	0.92|0.9412|0.9157|0.9636
B0393.3	626|1165|1377|1795|1850|1897	0.9167|0.9118|0.9149|0.9077|0.9252|0.9109
B0393.6	384|427|1218	0.96|0.925|0.9091
B0395.3.1	1570	0.913
B0403.4	479|481|645|1394	0.9756|0.9652|0.9524|0.9275
B0410.3	458|534	0.9053|0.9355
B0412.3a.1	497|1232|1301|2648	0.9259|0.9231|0.9259|0.9333
B0412.4	141|172|208	0.9781|0.9139|0.9091
B0414.3	92|213|570|647|659|662	0.9344|0.9107|0.9796|0.9627|0.9492|0.9724
B0414.5	719|1819|1988|2101|2737	0.9487|0.9231|0.9231|0.9231|0.913
B0414.6	235|465|941|944|1578|1608|2446|2453|2457	0.9231|0.9487|0.9565|0.9048|0.9459|0.9032|0.9286|0.9444|0.913
B0414.8a	129|169|1557|1981	0.9231|0.9333|0.9286|0.9268
B0416.5a	242|679|867|1283|1296|1299|1429|1641|1847	0.9459|0.9|0.963|0.9524|0.9494|0.9615|0.9423|0.9286|0.9342
B0432.2	32|535|646	0.9231|0.982|0.9333
B0432.3	467	0.9545
B0432.4.1	751|1045	0.907|0.9111
B0454.5	483	0.9091
B0457.1a	2343	0.9
B0457.2	397	0.9091
B0464.1.1	327|515|517|947|1118|1554	0.9694|0.9333|0.93|0.9459|0.9871|0.9254
B0464.1.2	1097|1664	0.9231|0.913
B0464.3	142|241|259	0.984|0.977|0.9231
B0464.4a.1	1136|1758	0.9091|0.9412
B0464.4a.2	1676	0.92
B0464.5c.3	2891	0.9091
B0464.5d.1	36|974|976|1623|2464|2709|2790	0.9455|0.9487|0.9286|0.9118|0.9333|0.9412|0.9245
B0464.6.1	738|1061|2008|2230	0.9048|0.9143|0.9608|0.9
B0464.6.2	867|1814	0.913|0.9512
B0464.8	713|743	0.9167|0.9167
B0464.9	557|710	0.92|0.9394
B0491.3	29|244|538|724|767	0.9508|0.9559|0.9259|0.9516|0.9577
B0491.5.1	1127|1188|1201	0.9032|0.9388|0.9211
B0491.5.3	981|1050|1124	0.913|0.9032|0.9062
B0491.6a	1094	0.9
B0495.2a	551|589|617|799|1894|1970|1972|2201|2223	0.9|0.9|0.9048|0.931|0.9|0.9048|0.9487|0.9057|0.9231
B0495.4	23|1927	0.9231|0.95
B0495.7.1	487|1738|2041|2057|2301	0.9|0.9016|0.9524|0.9167|0.9444
B0495.8a	621	0.9038
B0495.9	379	0.9032
B0507.2	45	0.9167
B0511.10	444|1100	0.9048|0.9231
B0511.12b	5686|5857	0.9|0.9
B0511.6	218|370|384|984|1058|1095|1305|1314|1358	0.971|0.9355|0.9367|0.9062|0.9203|0.9459|0.9643|0.9138|0.94
B0511.7	323|413|839	0.9216|0.9459|0.913
B0511.8.1	320|743|1030	0.9394|0.9118|0.9429
B0511.9a	174|296|344|814	0.9091|0.9474|0.9091|0.92
B0513.2a.2	305|435|463|660	0.9487|0.9365|0.9802|0.9556
B0513.3a	191	0.9403
B0513.4a	163|360	0.9139|0.9143
B0513.5a	720|1667	0.9048|0.9143
B0523.3	402|691|716|1284	0.9375|0.9429|0.9545|0.9592
B0523.5	3135	0.9091
B0546.1.1	212|326	0.9404|0.9863
B0546.1.2	205|319	0.9268|0.9551
B0546.2a	151|784	0.9167|0.9091
B0547.1	35|182|648|676|687|759|823|881|1137	0.9592|0.9444|0.9032|0.9691|0.9726|0.9485|0.9231|0.9167|0.9306
B0563.4	229|395|439|769|1021	0.9231|0.9242|0.96|0.9091|0.9286
B0564.11.2	1211	0.9
B0564.1a	24|806|823	0.9038|0.9053|0.9706
B0564.2a	489	0.92
B0564.7a	120|231|772|822|1299|1781	0.913|0.9333|0.9574|0.9048|0.9118|0.9189
BE0003N10.2	1207|1218|1276	0.9412|0.9259|0.9048
C01A2.3	45|771|912	0.9487|0.9474|0.9
C01A2.4	167|203|204|412|566|568	0.9231|0.9615|0.9672|0.9189|0.9231|0.9545
C01A2.5	206|306|312|705|717|930|1080	0.9545|0.9615|0.9412|0.9444|0.9444|0.9231|0.9333
C01B10.11	1034	0.9
C01B10.3	1048|1049	0.9167|0.9211
C01B10.6a.1	57|412|516|518|558|623|624|639|1022|1165|1167|1220|1570	0.9062|0.9444|0.9302|0.9231|0.9683|0.9452|0.9041|0.9|0.9365|0.9423|0.9333|0.931|0.9091
C01B10.8.1	1294|1898|1903	0.94|0.9211|0.9333
C01B10.9	774|777|1203|1810	0.9091|0.9661|0.9434|0.9375
C01F1.1	256|391|824	0.925|0.9661|0.9048
C01F1.2	323|1024	0.9032|0.9394
C01F1.6	171|1017|1347	0.9667|0.9048|0.9
C01F6.1	1025|1029|1620|1867	0.9|0.9091|0.9231|0.9412
C01F6.4a	271|541|1253	0.9545|0.9231|0.9091
C01F6.5	677	0.9
C01F6.6a	657|1414	0.9231|0.9111
C01F6.8a	151|236|572	0.9032|0.9032|0.9286
C01F6.9a	97|170|220|289	0.9636|0.9815|0.9892|0.9787
C01G10.10a	1075	0.92
C01G10.11a.1	803|1439|1442|1486	0.9091|0.9|0.9623|0.9444
C01G10.12	145|575	0.9167|0.913
C01G10.7.1	441|1031	0.9167|0.9048
C01G10.8.2	415|690|959|1166|1169	0.9119|0.9672|0.9333|0.9608|0.9652
C01G10.9.1	777	0.9167
C01G5.6	299|432|1011|1012|1194	0.9744|0.9545|0.9077|0.9271|0.9535
C01G5.8a	460|1340	0.913|0.913
C01G6.3.1	1108	0.9231
C01G6.5	122|1536|3135	0.9|0.913|0.9286
C01G6.6a.1	334|1139|1813	0.9574|0.9744|0.9355
C01G8.1a	1064|1067|1234	0.9217|0.9513|0.9531
C01G8.3	127|138|433|512|782|1141	0.9|0.9|0.9412|0.9324|0.9785|0.92
C01G8.5a	73|301|573|726|849|1430|1583|2028|2095|2225	0.9091|0.9652|0.9479|0.92|0.9444|0.9286|0.966|0.9554|0.974|0.9011
C01G8.5b	267|539|815|1433|1549|1994|2061|2191	0.9545|0.9431|0.9333|0.9014|0.9029|0.9077|0.9322|0.9231
C01G8.6	70|775|785|811|1237	0.9388|0.9143|0.9324|0.9459|0.9184
C01H6.5f	778	0.9
C01H6.7a.2	970|1503|2197	0.9|0.9091|0.9
C02A12.4	162	0.9
C02B10.1.1	90|135|269|396|572|939|1142|1171|1174	0.9492|0.904|0.9674|0.9712|0.9758|0.9426|0.9324|0.9231|0.9238
C02B10.1.2	553	0.9048
C02B10.2	206|314	0.9048|0.9394
C02B10.4	779	0.9107
C02D5.4	99|102|303|636	0.9048|0.9487|0.9615|0.96
C02E11.1a	2365|3449	0.9231|0.9286
C02F12.8	2002	0.9
C02F5.13	111	0.9167
C02F5.3	266|269|371|404|494|581	0.9789|0.92|0.9559|0.925|0.9423|0.9118
C02F5.4	417|517|519|983|991	0.9459|0.9375|0.9524|0.9155|0.9661
C02F5.5	358|484	0.9565|0.9583
C02F5.6b	66|151|534|1053|1293|1394	0.9636|0.9375|0.9592|0.9512|0.92|0.9091
C02F5.9	23|26|534|680|725	0.9032|0.9107|0.9487|0.9672|0.9304
C03A3.2	1169|1404	0.9487|0.9
C03B1.12	60|63|817|869|1023	0.931|0.9118|0.9091|0.9383|0.9474
C03C10.1.1	1339|1703	0.9245|0.9429
C03C10.1.2	58|252|964|987|1039|1248|1340|1488|1491|1572|1704	0.9231|0.9324|0.9|0.9053|0.9333|0.9167|0.9474|0.9054|0.964|0.9056|0.975
C03C10.3	645|689|729|850|1264	0.9692|0.9686|0.9394|0.9474|0.9153
C03C10.4	127|235|242|466	0.9383|0.9453|0.9048|0.9394
C03D6.4	564|2614|2683|2764|2875|3184|3253	0.9091|0.9412|0.9|0.913|0.9032|0.9048|0.9091
C03D6.6	136|545	0.9444|0.9459
C03D6.8	183|281|380	0.9054|0.9014|0.9325
C03E10.4	468|480|617|1485|1487|1490	0.9474|0.9194|0.9211|0.9545|0.9636|0.9
C03F11.3.1	248|677	0.9535|0.9394
C03G5.1	468|588|829|1377|2121	0.9231|0.9167|0.9259|0.9565|0.9545
C03G5.11	66|184|213|259|276	0.9756|0.9231|0.9|0.975|0.9216
C03G5.12	41|234	0.9286|0.92
C03G5.13	41|234	0.9444|0.9565
C03G5.2	259	0.9808
C03G5.8	262	0.9636
C03G5.9	41|234	0.9062|0.9512
C03G6.15	775|950|951|1311|1372|1373	0.9634|0.9556|0.9737|0.9661|0.9149|0.9474
C03G6.19	1047|1161|1169|1228	0.9265|0.9429|0.9512|0.9091
C03H5.2	542	0.9552
C03H5.3a	185|569	0.9048|0.9512
C03H5.5	1345	0.9048
C04A2.7a.1	1195|1297|1840|3114	0.9394|0.9302|0.9091|0.9
C04C3.3	176|747	0.9703|0.9694
C04E6.11	548|2973	0.931|0.9062
C04F12.1	1641|2724	0.9048|0.9333
C04F12.10	22|221|654|664|1057|1296|1312	0.9231|0.9714|0.974|0.9535|0.9|0.975|0.9464
C04F12.4.1	256|257	0.9586|0.9622
C04F12.4.2	244|245	0.9575|0.9609
C04F12.7	238|321|372|558	0.95|0.9|0.9406|0.9474
C04F5.7	90|528|531	0.9474|0.9524|0.975
C04F5.8	71|264|829|831|865|999|1017	0.9375|0.9186|0.9355|0.9375|0.95|0.9149|0.92
C04F5.9	365	0.931
C04F6.1	564|648|923|1031|1194|1219|1231|1266|1743|1831|1849|2035|2113|2115|2117|2706|3254|3413|3618|3715|4803	0.9742|0.9722|0.993|0.981|0.9705|0.9862|0.9318|0.9854|0.9851|0.9923|0.9231|0.9489|0.92|0.9286|0.9827|0.9806|0.9651|0.9597|0.9846|0.9408|0.9057
C04F6.4a.1	1100|1808|2008	0.9032|0.9091|0.9231
C04G2.6.1	2279|2432	0.9|0.9032
C04G2.8.1	166	0.9143
C04G2.9	25|555|599|886|1103	0.9|0.9273|0.9553|0.9091|0.9574
C04G6.3	4122|4463	0.9048|0.9333
C04G6.4	99|886	0.9062|0.9565
C04H5.8a	96	0.9167
C05B10.1b	308|669|671|1213|1648	0.9333|0.9118|0.9459|0.9|0.9286
C05C10.2b	4527|4639	0.9048|0.9118
C05C10.3	43|682|780|782|892|1294|1493	0.9231|0.973|0.9028|0.9493|0.9506|0.9753|0.9536
C05C10.4.2	730|1205|1206	0.9048|0.9259|0.9394
C05C10.4.3	1205|1206	0.9091|0.9259
C05C10.5a	211	0.9231
C05C10.6b	62|737|739|877|894|2267|2507	0.9444|0.9062|0.9344|0.9487|0.9273|0.9231|0.9091
C05C8.1a	559	0.9
C05C8.2	906|1021	0.9556|0.9524
C05C8.3.1	636	0.913
C05C8.4	1792|2201|2382|3004|3005|3335	0.931|0.9231|0.9259|0.9062|0.931|0.9394
C05C8.5	553|1130	0.9429|0.9048
C05C8.6	268|602|834|1038|1479	0.9545|0.907|0.9216|0.9231|0.9787
C05C8.9a.1	647|808|966|1063	0.9038|0.9492|0.9375|0.9062
C05D11.1	1175|1575|1700|1760|1866|2064|2334|2748|2761	0.9348|0.92|0.9167|0.9474|0.9|0.96|0.9773|0.9494|0.9318
C05D11.10	310|317	0.9268|0.9429
C05D11.11a	728|956|1090|1196|1510	0.9487|0.9661|0.9298|0.9231|0.9091
C05D11.11b.1	677|834|1062|1094|1196|1255|1302|1372|1500	0.9647|0.9847|0.9709|0.9286|0.9713|0.9216|0.9646|0.9286|0.9524
C05D11.11b.2	656|813|1026|1041|1073|1175|1234|1281|1479|1595	0.9792|0.9889|0.9051|0.9659|0.9325|0.9791|0.9146|0.9684|0.9639|0.9196
C05D11.11b.3	641|798|1011|1026|1058|1160|1266|1464	0.9615|0.9876|0.9314|0.9778|0.9224|0.9598|0.975|0.94
C05D11.12.1	228|231|982|1146|1212|1272|1692|1841	0.9091|0.9275|0.9318|0.9459|0.9231|0.9189|0.9167|0.9091
C05D11.12.2	1107|1656	0.9231|0.9118
C05D11.2	418|1093|1095|1138|1258	0.9167|0.9429|0.9231|0.9167|0.9091
C05D11.3	352|778	0.931|0.9655
C05D11.9	1049|1391|1793|1883	0.9512|0.9623|0.9091|0.9464
C05D12.3a.1	1507|3109	0.9048|0.9444
C05D2.10a	91	0.9
C05D2.4a	55|502|1492	0.931|0.9|0.9487
C05D2.5	579|1311|1771|2106|2114|2275	0.9355|0.9412|0.9375|0.9286|0.931|0.9464
C05D2.8	1252|1276	0.9259|0.9167
C05D9.9b	759	0.913
C05E11.5	1392|1395	0.9333|0.9394
C05E11.8a	225|276	0.9474|0.9032
C05E4.9a.1	462|1453|1498|1622|1836|2147|2822|2850	0.9286|0.9032|0.9333|0.9459|0.9048|0.92|0.9167|0.9375
C05E4.9a.2	696|1214|1453|1498|1622|1836|1880|2147|2291|2850|3106	0.9286|0.9394|0.9623|0.9444|0.9592|0.9118|0.9024|0.925|0.9444|0.9429|0.931
C05G5.4.1	390|448|474|566|725	0.9216|0.9153|0.9231|0.9286|0.9429
C05G5.4.2	388|566|725	0.9143|0.9429|0.9806
C06A1.1	110|384|663|1167|1282|1372|1515|1741|1962|1990|1995|2258|2419|2421|2615	0.9915|0.956|0.9714|0.9845|0.9663|0.963|0.9226|0.9873|0.9733|0.9764|0.9032|0.9643|0.9838|0.9763|0.9325
C06A1.5	363|365	0.9231|0.951
C06A5.3a	1636|1661|2358	0.9|0.9091|0.9
C06A5.6.1	1767	0.9394
C06A5.7a.2	888	0.9189
C06A5.9	440|1163|1165	0.9|0.9444|0.9268
C06A6.3.1	71|910	0.9753|0.9464
C06A6.4a.1	759|810|949|992|1239	0.951|0.9748|0.9868|0.9318|0.9
C06A6.4a.2	800|939|1229	0.9259|0.9545|0.9333
C06A6.4b.1	759|810|991	0.9545|0.963|0.961
C06A8.1a.1	653|1888|2243	0.9062|0.9524|0.9167
C06A8.1a.2	653|1888|2107|2129|2217|2220|2223|2243|2267|2268	0.9375|0.9444|0.9091|0.9143|0.9333|0.9286|0.9434|0.9753|0.9286|0.9286
C06A8.1b.2	980|2288|2402	0.9231|0.9|0.913
C06A8.2	596|662|809|1081	0.9038|0.9412|0.9286|0.9697
C06A8.3	350|383|474|477|479	0.9577|0.9218|0.912|0.989|0.9167
C06A8.5	176|1214	0.9394|0.9118
C06A8.8b.1	362	0.9
C06B3.3	1187|1395	0.9636|0.9348
C06B3.6.1	821|1039	0.9286|0.9211
C06B8.8.1	195	0.9891
C06B8.8.2	182	0.9894
C06B8.8.3	182	0.9884
C06B8.8.4	182	0.9924
C06B8.8.5	182	0.9892
C06B8.8.6	182	0.9872
C06B8.8.7	182	0.9794
C06C3.1b	665|685|1754	0.9048|0.9|0.913
C06E7.1a	233|348|351|485|561|564|908|1000|1315|1371|1403	0.9703|0.981|0.986|0.967|0.9061|0.9583|0.9259|0.9583|0.9878|0.9752|0.9826
C06E7.3a.1	41|264|265|380|383|517|593|596|1001|1344|1392|1444|1446|1448	0.9195|0.9362|0.9725|0.9615|0.9643|0.9512|0.9279|0.9302|0.9259|0.9125|0.9296|0.913|0.9474|0.9024
C06E7.3a.2	1377	0.9
C06G3.10	66|74|78|108|1147|1210	0.9091|0.9375|0.9565|0.9592|0.9649|0.9677
C06G3.11	214	0.931
C06G3.1a.1	1135	0.9091
C06G3.2	340|972|1679|2057|2345|2476	0.9333|0.907|0.9|0.9706|0.9143|0.9149
C06G3.5a	86|142|426|512|919|1198|1317	0.931|0.9661|0.9333|0.9318|0.9492|0.9286|0.9535
C06G3.8a.2	386|452|489	0.9286|0.9|0.9167
C06G3.9.1	338	0.9231
C06H2.1.1	130|172|175|461|602|620|633|635	0.9551|0.9835|0.9939|0.9707|0.924|0.9313|0.9603|0.9306
C06H2.1.2	130|172|175|386|461|602|620|631|633|635|636	0.971|0.9836|0.995|0.9043|0.9788|0.9061|0.9152|0.9257|0.9506|0.9266|0.902
C06H2.3b	338|340	0.9737|0.9677
C06H2.6a	41|246|420|503|506	0.9114|0.9231|0.9239|0.9231|0.9286
C06H5.7.1	500|1339	0.9091|0.9
C07A12.4a.1	363|716|747|1595|1791	0.9156|0.9545|0.9767|0.95|0.9917
C07A12.4b.2	1591	0.9286
C07A12.4c.2	1393	0.9394
C07A12.7a.1	47|414|883	0.913|0.913|0.9
C07A9.2.2	193	0.9322
C07A9.3a	590|608|975|1491|2279|2615|3115|3117|3419|3535	0.9167|0.9048|0.9565|0.9189|0.9273|0.9118|0.9062|0.9512|0.9062|0.931
C07A9.7a	1454|1510	0.9333|0.913
C07B5.5	656|703|733	0.9123|0.9091|0.9444
C07D10.2a.1	419|541|1011|1418	0.9062|0.9259|0.9048|0.9375
C07D10.2b.1	566|1032	0.9|0.9091
C07D8.6	38|41|318|334|377|408|546|849|965|968|1113	0.9216|0.9647|0.9273|0.9608|0.9565|0.9333|0.9744|0.9837|0.9388|0.9268|0.9245
C07E3.1a.1	403|1296|1710|2469	0.9333|0.9091|0.9444|0.92
C07E3.2	8|561|1152|1155|1655|1723|1870|1974	0.913|0.92|0.9556|0.9062|0.9259|0.9286|0.9123|0.9211
C07G1.3a	79|322|1217|1420|1682	0.9429|0.9535|0.925|0.9375|0.9048
C07G1.4a	170|1170	0.9167|0.9231
C07G1.5.1	276|643|645|850|1066|1083|1744|1833|1905|2374|2464|2468	0.9286|0.9512|0.95|0.9167|0.9286|0.9286|0.9412|0.9583|0.9091|0.9231|0.9091|0.9535
C07G1.8	103	0.9444
C07G2.1a	105|374|706|960|1122|1266|1413|1527|1530|1817	0.9157|0.9206|0.9338|0.9864|0.9003|0.9577|0.9443|0.9365|0.9868|0.951
C07G2.2b	494|1758|1979	0.9259|0.9189|0.9032
C07G2.2c.1	1052	0.9231
C07G2.3a.2	131|291|301|392|593|739|823|1094|1301|1774|1852|1854|1858	0.9164|0.9515|0.9342|0.9429|0.9664|0.951|0.9194|0.9843|0.9111|0.9292|0.9672|0.9714|0.9643
C07G3.9a.1	386|797|1010|1256|1259|1314	0.9048|0.9038|0.96|0.95|0.9706|0.9
C07H4.2	787|1457|1459	0.9333|0.9375|0.9048
C07H6.4	921|1175|1306|1761|2564	0.9|0.9355|0.9048|0.9167|0.9302
C07H6.5	142|354|357|358|375|447|449|603|878|1037|1208|1288|1364|1485|1503|1515|1691|1767|1829|1878	0.9833|0.9589|0.9482|0.9082|0.9869|0.9574|0.9508|0.9666|0.9262|0.9906|0.9|0.9614|0.9831|0.9732|0.951|0.9878|0.9335|0.9581|0.9173|0.9531
C07H6.6	1753	0.9
C08A9.10	384	0.9545
C08B11.1.1	189|240|812|1368|1843|1844|1981|2713	0.9091|0.9333|0.9167|0.9032|0.9412|0.9|0.913|0.9167
C08B11.2	518	0.9259
C08B11.3a	1878|2119|2510|2954|3292|3646|3758|3867	0.9231|0.9474|0.9487|0.913|0.9583|0.9375|0.9167|0.9184
C08B11.4.1	705|727|1014|1807|2133|2392	0.9118|0.9677|0.9048|0.9107|0.9077|0.9333
C08B11.5	665|889|1147|1244	0.9785|0.918|0.9245|0.982
C08B11.6	772|875	0.9355|0.9459
C08B11.7.1	399|578	0.9107|0.913
C08B11.7.2	28|314|363|415|591|771	0.9355|0.9167|0.9405|0.9481|0.9016|0.9231
C08B6.7b	101|359|676|1394|1772|2127|2278|2357|2394|2604	0.9118|0.9167|0.931|0.9394|0.9259|0.9091|0.9231|0.9|0.9348|0.9286
C08B6.8a	439	0.9059
C08B6.9	534|840|898|969	0.9054|0.9605|0.9531|0.9487
C08C3.2a.1	439|858	0.9231|0.913
C08C3.4b	788|951	0.9405|0.9661
C08F11.10	862	0.9048
C08F11.11.1	69|369	0.9085|0.9538
C08F11.11.2	73|340|373	0.9038|0.9074|0.9
C08F11.11.3	372	0.913
C08F11.12	331	0.9259
C08F11.8.1	189|602|1466|1495	0.9275|0.9355|0.928|0.9605
C08F11.8.2	225|558|638|1095|1422|1451	0.9206|0.9651|0.9302|0.9167|0.9125|0.9268
C08F8.1a	63|238|394	0.903|0.962|0.9862
C08F8.3a	121|240|727|797|936|977|1093|1248|1336	0.9206|0.9574|0.9111|0.9111|0.942|0.9|0.9167|0.974|0.9074
C08F8.6	645	0.9
C08H9.16	92	0.9
C08H9.2a	36|58|117|118|218|721|940|1344|1348|1832|2013|2016|2548|2997|3941|4019|4120	0.9024|0.9091|0.9048|0.9358|0.9381|0.9692|0.9394|0.9184|0.9048|0.9469|0.9184|0.9887|0.9509|0.9167|0.9091|0.9517|0.9111
C08H9.2b	3134	0.9259
C09B8.4	592	0.9355
C09B8.6a	878	0.9545
C09B9.2	1021	0.9
C09B9.6	24|95|173|439	0.9556|0.9636|0.9487|0.9298
C09D4.2	896	0.9375
C09D4.5.2	624	0.9178
C09D4.5.3	522|554	0.91|0.9059
C09G4.2b.2	259|766|1495|1498|1541|1656	0.9322|0.9231|0.9118|0.9348|0.9455|0.9697
C09G4.2b.3	1438	0.9259
C09G4.3	88|128|339|356|417|589	0.9706|0.9048|0.92|0.9265|0.9167|0.9459
C09G5.2a	16|181|302|325	0.9556|0.9091|0.9394|0.9167
C09G5.4	43|116|907|969	0.9|0.9053|0.979|0.954
C09G5.5	599|632|693|818|922|963|986|987|1020	0.9102|0.9602|0.9893|0.9689|0.9059|0.9259|0.9732|0.9645|0.9033
C09G9.1c	842	0.931
C09G9.2a	333|621|880	0.9|0.9302|0.9444
C09G9.6	172|300|497|558|772|1043|1171|1174|1180|1183|1300|1464|1642	0.9655|0.9562|0.9|0.9444|0.9603|0.9048|0.9769|0.972|0.9556|0.9259|0.9294|0.9018|0.9375
C09H10.10a	226|872|1140	0.9091|0.9189|0.9
C09H10.2.1	152|249|272	0.9628|0.9954|0.9808
C09H10.2.2	152|249|272|302	0.9417|0.9977|0.9755|0.906
C09H10.3	534|596|729|745|783|1071|1095|1165|1337|1435	0.951|0.9|0.9809|0.9785|0.9603|0.94|0.9639|0.9412|0.9596|0.9605
C09H10.5a	574|575|895	0.9091|0.9231|0.9048
C09H10.5c	604|924	0.9259|0.9259
C09H10.6	268|272|693|943|1159	0.9692|0.9101|0.9|0.9|0.9167
C09H5.2a	320|440|2412	0.92|0.9|0.9048
C10B5.3	554|634	0.9048|0.9
C10C5.3	404|478|496|609|922|1307	0.913|0.9167|0.9545|0.9091|0.9032|0.9104
C10C5.4	597|879|910	0.95|0.9|0.9574
C10C6.5.1	343|492	0.9167|0.913
C10C6.6	1833|2568|2748|2750|3489	0.9|0.9048|0.9091|0.92|0.9487
C10E2.6	699|1224	0.9143|0.913
C10F3.1	888|1617|1626|2022	0.9375|0.9167|0.9259|0.9444
C10G11.5a	129|246|279|281|997|1519	0.9048|0.9464|0.9211|0.9615|0.9375|0.9167
C10G11.7a.2	685|895|898|1196|1211|1228|1232|1262|1460|1463	0.9474|0.92|0.92|0.907|0.9062|0.9286|0.9667|0.9062|0.9574|0.9032
C10G11.7a.3	187|217|685|892|895|898|1211|1213|1229|1233|1259|1263|1461|1464|1611	0.9167|0.9444|0.9709|0.9459|0.973|0.963|0.9048|0.9681|0.9412|0.9706|0.9565|0.9111|0.9756|0.9647|0.9286
C10G11.8	32|1085	0.9|0.9091
C10G11.9	475	0.9412
C10G8.8a	329|330|763|991|995	0.9375|0.9062|0.9211|0.9024|0.9245
C10H11.10	185|197|329|423|786|802|824|865	0.9167|0.9275|0.9355|0.9353|0.9155|0.9444|0.9519|0.9706
C10H11.6a	1218|1221	0.92|0.9091
C11D2.4	339|482|774|1161|1230	0.9062|0.9545|0.9028|0.9091|0.9057
C11D2.7	53|89|122	0.9406|0.96|0.9429
C11E4.1	78|81|118|322|639	0.9355|0.9574|0.9167|0.9302|0.9118
C12C8.2a	792	0.9592
C12C8.3a.1	2006|3950|4282	0.9032|0.913|0.9
C12C8.3b.1	4270	0.913
C12D12.1c	2445	0.9
C12D12.2a	251|565|1272|1600	0.925|0.9231|0.9091|0.9636
C12D12.2b	154|1503	0.9189|0.9615
C12D8.10a.1	594|1004|1426|1551	0.9375|0.9302|0.9211|0.9375
C12D8.10a.2	458|594|1004|1551	0.9545|0.9535|0.9574|0.9375
C12D8.11.1	284|1504|1681	0.9231|0.9444|0.9111
C12D8.11.2	284|781|951|1504|1507	0.9375|0.9333|0.931|0.9701|0.9355
C12D8.17	233	0.9091
C12D8.18	176|311	0.9|0.9032
C12D8.1a	616|1430|1853	0.9474|0.9439|0.931
C12D8.5	525|885	0.9429|0.9231
C13B4.2	510|1060|1502	0.9211|0.9359|0.945
C13B9.3.1	395|563|1351	0.9|0.9048|0.931
C13B9.3.2	151|395|563|820|994|1351|1393|1537	0.9375|0.925|0.9032|0.9302|0.9057|0.971|0.9362|0.9118
C13C4.5	526	0.9048
C13F10.6a	739|764|911	0.9091|0.9286|0.9355
C13F10.7.1	95|430	0.9091|0.9167
C13G3.3a.1	881	0.9048
C13G3.3b.1	519|893	0.913|0.913
C13G5.2.1	48|277|1058	0.9062|0.963|0.9048
C14A4.1	258|334|372|619	0.9286|0.9524|0.9432|0.9375
C14A4.10	391	0.94
C14A4.11	540|628	0.913|0.9091
C14A4.14	1333	0.9286
C14A4.2	345	0.9636
C14A4.3	1871	0.9211
C14A4.4a	204|543|785	0.9091|0.9167|0.9167
C14A4.4b	543|785|2195	0.9286|0.9355|0.9231
C14A4.5	456	0.9487
C14A6.1	652	0.9057
C14B1.1.1	300|665|671|1064|1066|1342|1457|1459	0.9737|0.9858|0.9357|0.9444|0.9677|0.99|0.9712|0.9888
C14B1.1.2	650|1292|1327|1442|1444	0.9574|0.9067|0.9737|0.9062|0.9365
C14B1.2	403|405|451|478|628	0.9101|0.9867|0.901|0.9701|0.9242
C14B1.4.1	185|186|1271	0.9565|0.931|0.9615
C14B1.8.1	651	0.9259
C14B1.9	69|235|304|392|394|490|620|812|850	0.9559|0.9771|0.9048|0.9362|0.9231|0.9167|0.92|0.9123|0.9194
C14B9.1.1	133|345	0.913|0.9091
C14B9.10.1	100	0.9012
C14B9.10.2	176	0.9091
C14B9.4a	490|1190|1447	0.9231|0.9556|0.9333
C14B9.7	182|261	0.9437|0.9649
C14C10.1	485|696	0.9355|0.9355
C14C10.3a	348|461|745|861	0.92|0.9048|0.9574|0.9062
C14C10.4	638|2984	0.9091|0.95
C14C10.5b	1254|3353|4044|4295|4971	0.913|0.9286|0.9|0.9259|0.913
C14C11.2.2	402	0.913
C14C11.7	157	0.9535
C14C6.2a	263|602	0.913|0.9394
C14C6.5a	156	0.9048
C14F11.1a.1	252|597|599|748|1181|1450	0.9487|0.9333|0.9155|0.913|0.9785|0.963
C14F11.4a	258|536|707|772|774|792|900|1162|1388	0.9703|0.9032|0.9286|0.9184|0.9813|0.9079|0.9615|0.913|0.9388
C14F11.5a	1197|1203|1212	0.9211|0.9107|0.9355
C14H10.1	241|596|846|856|859	0.9057|0.9211|0.9615|0.931|0.9375
C15A11.5	315|396|397|729|730|892	0.9106|0.9328|0.9055|0.9398|0.9301|0.963
C15A11.6	45|309|314|395|396|728|891|951	0.9474|0.9153|0.906|0.94|0.9259|0.9083|0.95|0.9091
C15A11.7a	1079	0.9062
C15C6.2b	239|242|431|706	0.9531|0.963|0.9444|0.9487
C15C7.5.1	282	0.9167
C15C7.5.2	282|592	0.9091|0.92
C15C8.3a	553|632|658|976|979|1102|1303	0.9385|0.939|0.9216|0.9717|0.9574|0.9423|0.9032
C15C8.4	763|1254	0.9412|0.913
C15C8.7	67|199|394|437	0.9211|0.9032|0.9688|0.9577
C15F1.1a	377|468|774	0.9|0.9048|0.9048
C15F1.4	244|445|446|675	0.9194|0.95|0.9394|0.9
C15F1.6	314|663|826|865|999	0.9412|0.9758|0.942|0.9578|0.907
C15F1.7a	98|257|420|545	0.9667|0.9833|0.95|0.963
C15F1.7b.1	51|210|373|495|498	0.9608|0.9816|0.9318|0.9091|0.9487
C15F1.7b.2	197	0.9149
C15H11.4.1	40|74|775|926|998	0.9022|0.9231|0.9722|0.9182|0.9423
C15H11.4.2	916	0.9286
C15H11.6.1	331	0.9048
C15H11.7	87|188|293|296|851|861	0.9091|0.9762|0.9884|0.9556|0.9804|0.9489
C15H11.9	160|516|645|1097	0.9178|0.9259|0.9118|0.9512
C15H9.11.1	361	0.9259
C15H9.6a.1	1646|1647|1722	0.9333|0.902|0.9444
C15H9.6a.2	31|215|306|625|1074|1075|1367|1368|1443|2218|2220	0.9344|0.9091|0.9661|0.95|0.9714|0.9444|0.9298|0.9304|0.957|0.9118|0.9239
C15H9.6a.5	290|1058|1059|1576|2204	0.9545|0.9178|0.9074|0.9|0.9038
C15H9.7	8|390|1061|1069|1352|1389|1443	0.9048|0.9394|0.974|0.9167|0.9771|0.9388|0.9375
C15H9.8a	1037	0.9048
C15H9.9.1	117|324	0.9167|0.913
C16A11.3a	98	0.9231
C16A11.4a	949|1257	0.9189|0.9394
C16A11.4b	546	0.9
C16A11.6	22|221|270	0.9|0.9592|0.9512
C16A3.10.1	688|788|1363|1367	0.9268|0.9024|0.9255|0.9708
C16A3.10.2	684|784|1363|1364	0.9111|0.9455|0.9562|0.9524
C16A3.10.3	1330	0.9048
C16A3.3	3353|4795|5437	0.9091|0.9355|0.9048
C16A3.4.2	206	0.9
C16A3.5.1	547|556|563|701	0.9296|0.9242|0.9901|0.913
C16A3.5.2	486	0.9333
C16A3.6	891|894|993|1103	0.9412|0.9583|0.9091|0.9189
C16A3.7	365|851|893|1143|1716|2017	0.9107|0.9286|0.9062|0.9545|0.9242|0.9138
C16A3.8	231|4076	0.9167|0.9
C16A3.9	73|320|419	0.9116|0.9887|0.99
C16B8.3	373|379	0.912|0.9167
C16C10.11.2	10|38|71|72|87|110|111|113|308|311|314|317|472|613|676	0.9043|0.9358|0.9415|0.9595|0.9378|0.9262|0.9738|0.9879|0.9926|0.9948|0.9925|0.9214|0.9443|0.9849|0.9801
C16C10.2	312|468|701	0.9647|0.9204|0.914
C16C10.3	1445|1573|3488|3490	0.92|0.9231|0.9429|0.9032
C16C10.5	267|962|981|1098	0.913|0.9221|0.9167|0.9737
C16C10.6	437|485|494	0.9333|0.92|0.9231
C16C10.7a	623	0.913
C16C10.8	93|410|416	0.9706|0.9167|0.9091
C16C2.3a	713|1298|1545	0.9143|0.913|0.913
C16C2.4a	26|319|1052	0.9423|0.9231|0.9167
C16C2.4b	26|515	0.9048|0.9259
C16C8.11	197|371	0.9091|0.9062
C16C8.16	63|140|410|522	0.9545|0.913|0.9333|0.9556
C16C8.4	136|211	0.9615|0.9286
C16H3.2	143|191|279|366	0.9167|0.9841|0.9474|0.9251
C17C3.12a.2	468|787|972|1038|1363	0.9231|0.913|0.9149|0.9429|0.9167
C17E4.10a.1	1283	0.9286
C17E4.11	616	0.9286
C17E4.3	31|33|81|609|702|725|1117	0.9362|0.931|0.9524|0.9718|0.9263|0.9157|0.9223
C17E4.5	251|705|720	0.9167|0.957|0.9375
C17E4.6	615|1256|1431|1434	0.9|0.92|0.913|0.913
C17E4.9a.1	1540|1887|1891|2109|2208	0.9643|0.9703|0.9508|0.9643|0.9355
C17F3.1	134	0.9211
C17F4.5	1007	0.9375
C17F4.7.1	257|402|522	0.9062|0.9808|0.9766
C17F4.7.2	257|402|522	0.9612|0.9767|0.9744
C17G10.1.1	542|1414	0.9211|0.9032
C17G10.13.1	630	0.9048
C17G10.5.1	139|280|462|486|487|740|793|804|806|814	0.9091|0.9714|0.991|0.9235|0.9572|0.9659|0.9879|0.9459|0.9|0.9429
C17G10.5.2	267|449|474|727|780|801	0.9259|0.9184|0.9024|0.92|0.9535|0.9048
C17G10.8	50|206|209|1121|1230	0.931|0.9048|0.9|0.9057|0.925
C17G10.9a	936|1604|1737	0.9|0.9|0.9535
C17G10.9b	921|1519|1572|1598|1731	0.9|0.9375|0.9024|0.9091|0.9512
C17G10.9e	930|1607|1740|1743	0.9355|0.9216|0.9643|0.9091
C17H12.1	104|106|107|515|900|2310|2399	0.9375|0.9286|0.9474|0.9|0.95|0.9464|0.9608
C17H12.12	1738|1801	0.92|0.95
C17H12.13a	1060	0.9451
C17H12.13b.1	180|874	0.907|0.9268
C17H12.13b.2	874|985	0.9091|0.913
C17H12.14	722|786|814|955|1087	0.9713|0.9846|0.9437|0.9916|0.9286
C17H12.5	236|337|706	0.9048|0.9048|0.9
C17H12.8.1	226|433|520|523	0.9194|0.9242|0.9259|0.9683
C17H12.8.2	226|433|523|863	0.9014|0.9333|0.9589|0.902
C18A11.7a	1183|1254|1574|1673|2109|2185	0.933|0.9895|0.9318|0.9342|0.9038|0.9531
C18A11.7b	300	0.9574
C18A3.1	589|930	0.9091|0.9048
C18A3.2.2	805|1054	0.913|0.9091
C18A3.3	378	0.9149
C18A3.4a.1	171	0.9286
C18A3.5a	584|621|1385|1439|1572	0.92|0.9167|0.9231|0.96|0.9062
C18B12.4	246	0.9167
C18B2.3.1	661	0.9583
C18B2.4	21|24|426|777	0.9091|0.918|0.9231|0.92
C18B2.5a	32|316|809|1171|2153	0.9474|0.9487|0.9615|0.9592|0.9355
C18B2.5b	887|1249|1550	0.9474|0.931|0.913
C18D11.1	778	0.9032
C18D11.3.2	388|634|860|918|1252|1268	0.9091|0.9412|0.9184|0.9286|0.9275|0.9718
C18E3.2.2	274|484|740|987|1084	0.9048|0.9388|0.9508|0.9062|0.902
C18E3.5	503|612	0.9512|0.9
C18E3.6a.1	572|1361	0.9062|0.9444
C18E3.6a.2	392|556|668|1345|1379	0.9|0.9333|0.9048|0.9556|0.9333
C18E3.7c.1	1717	0.9
C18E3.8	333|686	0.9474|0.9091
C18E3.9a	195|294|728	0.9149|0.9286|0.9437
C18E9.11a	223|366|370|706|714|934|1098|1121|1128|1181	0.9394|0.925|0.9787|0.9259|0.9524|0.9184|0.9318|0.9355|0.9286|0.9672
C18E9.2a	581|869|1025|1103	0.9483|0.9333|0.9059|0.9167
C18E9.4.1	111|275	0.9604|0.9866
C18E9.5	282|342	0.9211|0.9167
C18E9.6	248|602|813|823|872|1089	0.9118|0.963|0.9375|0.9014|0.9535|0.9146
C18E9.9	437	0.9231
C18F10.7a	665|1215|1354	0.9|0.9444|0.9459
C18G1.4a	252|320|644|1024|1076|1253|1407|1410|1677|1679|1815	0.9091|0.9706|0.9167|0.9032|0.9024|0.9683|0.9143|0.9574|0.9589|0.9524|0.9138
C18G1.5	356|450|606|677|678|764	0.9806|0.9577|0.9804|0.9705|0.9721|0.9294
C18H9.6	334	0.9444
C23G10.2a.1	274|276|307|595	0.9167|0.9362|0.9706|0.9
C23G10.2a.2	161	0.9649
C23G10.2b	184	0.9701
C23G10.2c	57	0.9333
C23G10.3	265|753|755|777	0.9932|0.9124|0.9286|0.9493
C23G10.4b.1	2500|2531|2555|2961	0.9048|0.9412|0.9048|0.9167
C23G10.4b.2	185|263|294|779|782|1323|1704|1705|2503|2534|2558|2600|2830|2939|2949|2953|2964	0.9259|0.9091|0.9355|0.931|0.9|0.9296|0.9242|0.9306|0.9773|0.9833|0.973|0.9677|0.9375|0.9041|0.9043|0.9328|0.9778
C23G10.4b.3	2501|2920|2931	0.9259|0.9231|0.9048
C23G10.6	416	0.931
C23G10.7b	1254	0.92
C23G10.7c	396|1680	0.9048|0.9268
C23G10.8	780|1387|1593	0.9048|0.9|0.9655
C23H3.2a.1	340|1065|1066|1161|1203|1204	0.9024|0.9091|0.907|0.9|0.9091|0.9167
C23H3.2b	729|1460|1461|1599	0.92|0.9298|0.9216|0.9074
C23H3.4a.1	564|1390|1393	0.9032|0.9296|0.9091
C23H3.4b.1	373|1028	0.9429|0.9412
C23H3.5	872	0.9412
C23H4.1.1	1256	0.9032
C23H4.1.2	1197	0.9048
C23H5.1	642|745	0.9231|0.913
C23H5.8a	362|489	0.9123|0.9111
C24A11.1	243|472	0.9091|0.9048
C24A3.6.2	312|1316	0.9|0.9091
C24B5.2a	1132|1224|1291	0.9048|0.913|0.9333
C24B5.2c	1315|1369|1407	0.9048|0.9091|0.9
C24B9.3	234|1051|1098	0.9394|0.9138|0.9
C24D10.4	631	0.9362
C24D10.6	270|305|325|431|484	0.9302|0.9605|0.9481|0.9143|0.9516
C24D10.8	296	0.9062
C24F3.1a	63|287|415|520|524|951|1042|1045|1048|1051|1420	0.9048|0.9565|0.9155|0.9489|0.9692|0.9512|0.9487|0.9767|0.9806|0.9143|0.9375
C24F3.1b	287|526|530|957|1048|1051|1054|1057|1283	0.931|0.9588|0.9277|0.9032|0.9333|0.9636|0.9706|0.9048|0.9194
C24F3.2	715	0.9355
C24F3.4a	320|677|1121|1619|1876|1994	0.913|0.9167|0.9474|0.9429|0.9231|0.94
C24F3.6.1	305|521|525|606|801	0.9325|0.9116|0.9156|0.9695|0.9596
C24F3.6.2	305|521|525|606|801|1008|1075|1095	0.9424|0.9016|0.9095|0.9754|0.9289|0.9136|0.9|0.9505
C24G6.1	115|189	0.9136|0.942
C24G6.3	1311|1924	0.9048|0.9259
C24G6.8b.1	348|427|599|854|1309	0.9167|0.9636|0.9052|0.9062|0.9176
C24H10.5	459|894	0.9556|0.9028
C24H12.4a	461|525|1136|1578|1859	0.95|0.9|0.9|0.9091|0.9608
C24H12.5b	310|1165	0.9048|0.9091
C25A1.1	348|403|719	0.9254|0.9286|0.9592
C25A1.10a.1	2273	0.9259
C25A1.10a.2	711	0.9048
C25A1.12b.1	880|967|987|1324|1330	0.9189|0.931|0.9032|0.9286|0.9429
C25A1.12b.2	1268	0.9048
C25A1.13	50	0.9355
C25A1.16a.1	148|238|279|281|547	0.9671|0.9325|0.9408|0.9541|0.9672
C25A1.16a.2	134|265|267	0.9286|0.9375|0.9394
C25A1.3	231|418|725	0.9032|0.9592|0.9615
C25A1.4.1	702|1340	0.9375|0.9674
C25A1.5	1164	0.9219
C25A1.7a.1	175|963|2384	0.9259|0.9048|0.9167
C25A1.8	47|366|369|550	0.9532|0.9817|0.9872|0.9695
C25A1.9a	1113	0.9574
C25A8.4	1676|1849|2225|2240|3160	0.9048|0.9701|0.9208|0.9259|0.9423
C25B8.3a	90|643|722|889|1163	0.9766|0.9194|0.9635|0.973|0.9645
C25D7.10	69|735	0.9091|0.9535
C25D7.6	906|915|2459|2493|2497	0.9107|0.907|0.9577|0.9091|0.9091
C25D7.7	267|588	0.9048|0.92
C25D7.8.1	316|476|725	0.9344|0.9118|0.9231
C25D7.8.2	316|476|725	0.9589|0.9091|0.9167
C25E10.12	315	0.92
C25E10.5	263|1104	0.9048|0.9048
C25E10.8	101|303	0.9091|0.9118
C25F6.3	985|2023|2215|2298|2365|2700|3014|3233|3314	0.9048|0.9|0.9048|0.9545|0.9167|0.9|0.9474|0.913|0.9375
C25G4.2.1	272	0.9062
C25G4.5	244|1462|1478|2494|2596|3468|3471	0.913|0.9091|0.9167|0.913|0.9375|0.9|0.92
C25G4.6	870|958	0.9149|0.9138
C25H3.4.1	244|949|1195	0.9|0.9231|0.9259
C25H3.6a	431|698|1190	0.9|0.9048|0.9231
C25H3.7a	340|359	0.9362|0.931
C25H3.9a	125|232|388|576|771	0.9038|0.9008|0.9714|0.968|0.9216
C26B2.1	651	0.9344
C26B2.3a.1	1510|1932	0.913|0.9167
C26B2.6	243|326|327|508|637|638|750|969|971|972	0.9|0.9231|0.9423|0.9211|0.9077|0.9474|0.9322|0.9467|0.9663|0.9733
C26B9.5	856|1208|1667	0.9167|0.925|0.931
C26C6.2	1715|1718	0.92|0.92
C26C6.9	696	0.9143
C26D10.1	274|291|754|922|1154|1291|1631|1634|1940|2017|2020	0.9062|0.9138|0.9286|0.9524|0.9296|0.9592|0.9558|0.9111|0.9043|0.96|0.9143
C26D10.2a	548|905|956|1155|1268|1303|1431|1441	0.9496|0.9321|0.9071|0.9348|0.9139|0.954|0.9201|0.9273
C26E6.11	183	0.9
C26E6.12	681	0.9268
C26E6.5	232|272|433|629|710|713|899|1339	0.9661|0.9067|0.9677|0.96|0.9455|0.9516|0.9375|0.9412
C26E6.7b.2	1280|1320|1448|1501|1678	0.9375|0.9333|0.9062|0.9459|0.9474
C26E6.8a	271|812	0.913|0.92
C26E6.8b	271|812	0.9048|0.9
C26F1.4.1	311	0.987
C26F1.4.2	311|356	0.9813|0.9218
C26F1.4.3	309	0.9874
C26F1.7a.1	283	0.9091
C26F1.9	44|161|164|173	0.9905|0.984|0.9974|0.9228
C26H9A.1b	1580|2187|3683	0.9231|0.9048|0.9487
C27A12.2	30|720|813|814|1571|1572|1607	0.9375|0.9259|0.9091|0.9375|0.9118|0.9024|0.9062
C27A12.6	1463	0.9333
C27A12.7a.1	170|1624	0.92|0.9
C27A12.7a.2	136	0.9091
C27A12.8.1	1788	0.9032
C27A2.1	298|1028|1557|1560|2284|2335|2485|3090	0.9375|0.9302|0.9375|0.9535|0.9615|0.9167|0.9355|0.9565
C27A2.2a	323|354	0.968|0.9544
C27A2.3.1	413|535|539|542|803|907	0.9248|0.9545|0.967|0.9663|0.9355|0.9211
C27A2.6	413	0.9333
C27A7.6a.2	497|607|737|1585|1586	0.9091|0.9032|0.9167|0.9091|0.9492
C27B7.1a	226|296|915|949|1088	0.9512|0.9062|0.9545|0.9444|0.9683
C27B7.1b	222|948|1087	0.9048|0.9|0.931
C27B7.4	3660	0.9167
C27B7.5	514|515|941|1236	0.9307|0.9296|0.9024|0.9048
C27B7.8	273|364|750|936|958|1111	0.9667|0.925|0.9487|0.9412|0.9032|0.918
C27C7.1	17	0.9661
C27D11.1	20|236|448|645|799|947|1192|1213|1216|1279|1360|1399|1406|2577|2579|2812|2877|2897|3380|3381	0.9014|0.9|0.9545|0.9167|0.9756|0.9348|0.9194|0.9625|0.9474|0.98|0.9286|0.9775|0.925|0.9048|0.9394|0.9355|0.9143|0.9213|0.9091|0.9127
C27D6.4a.1	575|937	0.9118|0.9429
C27D6.4b	304|312|380|473|510|974	0.9412|0.9375|0.92|0.9211|0.9394|0.9
C27D9.1	62|1488	0.9143|0.931
C27F2.10.1	43|323|726|819|1046|1103|1306|1401	0.92|0.9318|0.9574|0.9444|0.9091|0.9|0.9038|0.9545
C27F2.10.2	693	0.92
C27F2.4	281|833	0.9545|0.9322
C27F2.5	398|402	0.9114|0.9302
C27F2.7	503	0.9032
C27F2.8	4386	0.9091
C27F2.9	347|350	0.9589|0.9577
C27H6.2	251|273|1302|1556|1564	0.9107|0.9429|0.9565|0.9062|0.9048
C27H6.3	1125	0.9487
C27H6.4a	404	0.9149
C27H6.4b	578|890	0.9048|0.9091
C27H6.4c.5	527	0.9286
C27H6.8	158|510|647|650|729|776|908|951|1154	0.9167|0.9344|0.9467|0.9765|0.931|0.9394|0.9104|0.9385|0.9595
C27H6.9	29	0.9211
C28A5.3	368|517|527|892	0.9231|0.9149|0.9231|0.9118
C28C12.12	244|702	0.9062|0.9032
C28C12.2	41|44|166	0.9692|0.913|0.9006
C28C12.5	313	0.9091
C28C12.7a	153|156|328|330|736|809|811	0.9899|0.9789|0.972|0.9844|0.9091|0.9855|0.9167
C28C12.7b	153|156|328|330|687|935|1245	0.9794|0.9516|0.9355|0.9423|0.9565|0.9074|0.9342
C28C12.9.1	617|747|791	0.9032|0.9091|0.9333
C28D4.2c	74	0.9091
C28D4.3.1	88|90|1035|1061	0.9885|0.9688|0.9394|0.9703
C28D4.3.2	75|1022|1048	0.9565|0.9|0.9259
C28D4.5	884	0.9032
C28D4.7	822	0.9
C28H8.11a.1	262|867|869|882	0.9038|0.925|0.907|0.9155
C28H8.12.1	439|441|577|643	0.9375|0.9286|0.9512|0.9091
C28H8.12.2	439|441|574|577|643|987	0.9615|0.9167|0.9592|0.9714|0.9062|0.9167
C28H8.3	69|469|767|936|1089|1680|2107|2277|2438|3125|4064|4709|4773|4776|4978|5200|5404	0.9167|0.9286|0.9|0.9091|0.9286|0.92|0.9512|0.9153|0.931|0.9375|0.9672|0.9318|0.9394|0.9608|0.9167|0.9481|0.9077
C28H8.4.2	319|345|445|482|484|873	0.9643|0.9603|0.9744|0.9714|0.9639|0.918
C28H8.9a	15|1191|1300	0.9032|0.9529|0.9067
C29A12.1	111|531|712|829|836|917	0.9273|0.9077|0.9649|0.9333|0.9022|0.9492
C29A12.3a	74|343|1233|1862|2221	0.92|0.9375|0.9394|0.9167|0.9231
C29E4.12	108|479	0.95|0.9412
C29E4.2	956	0.931
C29E4.3a	1875	0.9
C29E4.4	528|2937	0.913|0.9
C29E4.7	346|365	0.931|0.92
C29E4.8.1	194|430|711|899|1047	0.9231|0.9759|0.9545|0.9367|0.9
C29E4.8.2	366|438|647|827|835|983	0.9737|0.925|0.9712|0.9076|0.9606|0.9429
C29F3.7a	366|388|389|1028|1210	0.9615|0.9149|0.9375|0.9302|0.913
C29F4.1	325|411|414	0.9677|0.9722|0.9726
C29F5.1	601	0.9574
C29F7.2a	355|395|695|1076|1077|1276	0.9574|0.9423|0.9355|0.9268|0.9412|0.9167
C29F7.3	562	0.963
C29F9.7	1023|1484|1485|1496	0.92|0.913|0.913|0.9355
C29G2.6	448|577	0.9032|0.9
C29H12.1	610|1171|1571	0.9333|0.9459|0.9211
C29H12.2.1	119|492|832|904|1091	0.9468|0.9604|0.942|0.9583|0.9754
C30A5.3	90|225|648|717	0.9048|0.9623|0.9118|0.9048
C30B5.1	487|1261|1875|1877|2239|2270|2358	0.902|0.9014|0.9184|0.9688|0.9322|0.9365|0.9394
C30B5.2a	78|741	0.9275|0.9512
C30B5.4	333|884	0.9444|0.931
C30C11.2.1	135|708	0.9565|0.9608
C30C11.2.2	135|583|676|708|736|1054	0.9923|0.91|0.9286|0.9901|0.9444|0.9107
C30C11.4.1	204|513|518|570|1114|1956|2271|2316|2367	0.902|0.9355|0.9189|0.9716|0.9468|0.9324|0.9216|0.9655|0.9294
C30C11.4.2	559|2260	0.9091|0.9
C30F12.2.1	781|845|1138	0.9091|0.9|0.9167
C30F12.4	163|343|347	0.9|0.9189|0.9231
C30F12.7.1	520	0.931
C30F8.2.1	233|418|1304|1306|1307	0.931|0.9592|0.9022|0.9516|0.9699
C30F8.2.2	1045|1298|1301	0.9048|0.9|0.9464
C30G12.2	475|535|664|871	0.9571|0.9776|0.9259|0.9695
C30G12.7	53|327|495|687|1667	0.9|0.9091|0.9375|0.9375|0.9118
C30G7.4.2	328	0.9444
C30H6.7a	13|50|196|209|211	0.9178|0.9412|0.9459|0.9773|0.9059
C30H6.8.1	72|210|507	0.9091|0.9167|0.9444
C30H6.9.1	156|414|495|550	0.9091|0.9429|0.9429|0.9286
C30H7.2a.1	1172	0.9048
C30H7.2a.2	1428	0.913
C31C9.1a	147|233|509|844|845|1290|1344|1350	0.9286|0.9024|0.9231|0.9016|0.9014|0.9286|0.9565|0.913
C31C9.1b	453|844|845|1290|1296	0.931|0.9062|0.9118|0.913|0.92
C31C9.7.1	247	0.9
C31C9.7.2	247	0.9
C31E10.7.1	473	0.9176
C31H1.5	818	0.9167
C31H1.6a	282	0.9
C31H1.8a	1754	0.913
C32D5.11	864|952|2254	0.9143|0.9062|0.9355
C32D5.3.2	287|1095|1336|1464|1845	0.9|0.9062|0.913|0.9333|0.9167
C32D5.5	707|940	0.925|0.9231
C32D5.8b	166|269|545|661	0.9385|0.9524|0.956|0.9389
C32D5.9	109|477	0.9235|0.9238
C32E8.2a.1	49|161|274|376|428|614	0.9182|0.9624|0.9406|0.9815|0.9574|0.9388
C32E8.2a.2	161|274|376|428|614	0.9431|0.9475|0.9798|0.9884|0.9132
C32E8.3	14|17|20|86|292	0.9683|0.9643|0.9231|0.9|0.9016
C32E8.5.2	12	0.913
C32E8.8	440|610|1060|2689|2691|2692|2696|2717|2765	0.9|0.9355|0.9167|0.9524|0.9231|0.9375|0.9444|0.9487|0.9375
C32E8.9	114	0.9444
C32F10.1a.1	425|825|1227	0.9231|0.9474|0.9231
C32F10.5	135|482|700|2115	0.9048|0.9556|0.9524|0.9
C32F10.8a.1	54|112|312|320|753|1306|1350|1630	0.92|0.9394|0.981|0.9274|0.9032|0.96|0.958|0.9592
C32F10.8a.2	113|313|321|1307|1351	0.9231|0.9531|0.9241|0.9298|0.954
C32F10.8a.3	400|408|1438|1718	0.9512|0.9259|0.9242|0.9048
C32F10.8a.4	724|1281	0.9|0.9259
C33A12.1	309|397|450	0.962|0.9528|0.9579
C33A12.3a	474	0.9048
C33A12.6a	871|983|1358|1562	0.9286|0.9231|0.9091|0.9231
C33B4.4	159	0.9394
C33F10.1	38|359|429|494	0.9054|0.9714|0.9101|0.9176
C33F10.9	172|237|339|395	0.9349|0.9256|0.9518|0.9107
C33G8.4	262	0.913
C33H5.10	201|228|415	0.907|0.963|0.9608
C33H5.12a	265|493	0.9495|0.9716
C33H5.13a	307|409	0.9259|0.9259
C33H5.15a	44|865	0.9375|0.9032
C33H5.19	373|433	0.9701|0.9268
C33H5.6	476	0.9474
C33H5.7	419|516|969|1124|1201	0.9474|0.9518|0.9302|0.9245|0.9167
C33H5.8	27	0.9444
C33H5.9	800	0.9
C34B2.10	209	0.9205
C34B2.2	181|469	0.9016|0.9107
C34B2.5	202|235|244|678	0.9663|0.9091|0.9268|0.9032
C34B2.6	61|280|896|1255|2155	0.95|0.9024|0.9583|0.963|0.9091
C34B2.7.1	119|573|1319	0.9487|0.9545|0.9615
C34B2.8	90|271|272|573|575	0.9815|0.9827|0.9647|0.9855|0.9848
C34B7.2	2559	0.9
C34C12.2	1257|1318	0.9355|0.9143
C34C12.5.2	749|802|930	0.9275|0.9091|0.9355
C34C12.8	694|696	0.92|0.9535
C34C6.4	208|250|933|958|1799	0.9259|0.9524|0.9524|0.9|0.931
C34D4.13	268	0.9535
C34D4.3	113|284|392	0.9681|0.9412|0.9789
C34D4.4	203|259|447|715|756	0.913|0.9286|0.9333|0.9375|0.9032
C34E10.1.1	1093	0.9194
C34E10.2	186|326|516|525|556	0.9524|0.9306|0.9636|0.9024|0.9259
C34E10.5.1	483|694	0.92|0.9636
C34E10.5.3	679|1809|1938|2360	0.9|0.9231|0.9048|0.9286
C34E10.6.1	63|97|175|232|529|532|1129|1156|1166|1220|1228|1239|1450|1555|1610|1750|1787|1790	0.9592|0.9797|0.9333|0.9429|0.9574|0.9506|0.9375|0.9681|0.9467|0.9305|0.9541|0.9459|0.9524|0.9048|0.9358|0.94|0.9|0.9683
C34E10.6.2	97|1166|1220|1228|1610	0.9524|0.9091|0.9348|0.9167|0.931
C34E10.6.3	63|97|175|232|529|532|653|1129|1156|1166|1220|1228|1239|1250|1392|1450|1555|1610|1770|1810	0.9925|0.9914|0.9325|0.9662|0.9922|0.9541|0.9333|0.971|0.9742|0.9846|0.9696|0.9888|0.9849|0.9464|0.9254|0.9905|0.9171|0.972|0.9468|0.9862
C34E10.8	53|1948|2157|2620|3133	0.9091|0.9048|0.9|0.913|0.92
C34F11.3a	460|1191|1449|1857|2465	0.9512|0.92|0.931|0.9|0.9
C34F11.6	395	0.9348
C34F6.2	189|229|282|429|443|543|625|627|629|739|806|815|840	0.9631|0.9977|0.9625|0.978|0.9073|0.9529|0.9597|0.982|0.9618|0.9194|0.9971|0.9883|0.9682
C34F6.3	124|335|680|682|792|859|868|893|897|916	0.9931|0.92|0.9792|0.9703|0.9503|0.9895|0.9586|0.9365|0.9041|0.9231
C34F6.8.1	334|839|1017|1296|1441	0.9091|0.9091|0.9091|0.9167|0.913
C34G6.2	2225	0.9038
C34G6.5	559|793|979|1173	0.9535|0.9057|0.9167|0.9259
C34G6.7a.1	754|1287|1290|1353	0.9167|0.9524|0.9444|0.9138
C34G6.7a.2	748|1074|1281|1284|1347	0.9444|0.9211|0.9375|0.9483|0.9423
C34H4.2	1353|1356	0.913|0.9
C35A11.4	1042	0.913
C35A5.6a	98	0.9048
C35A5.8	1100|1716|1920|1938|1968|2440|2702	0.9|0.9231|0.9259|0.9038|0.9|0.9455|0.9302
C35B1.2a	1374|1442|1632|1677	0.925|0.92|0.9091|0.9
C35B1.4	279	0.9242
C35B1.5	195	0.9722
C35C5.3a	532	0.9259
C35C5.3b	77|243|541	0.9216|0.92|0.963
C35C5.4a	589	0.9
C35D10.10	841	0.9103
C35D10.11	139|191|223|262|265|319	0.9784|0.9677|0.9508|0.9545|0.9878|0.9669
C35D10.13	39|158|371|600	0.9579|0.9524|0.9211|0.9432
C35D10.16	251|321|334|386|487	0.9216|0.9367|0.9279|0.9143|0.9636
C35D10.17.1	238	0.9167
C35D10.2	752|876|928	0.95|0.9655|0.9057
C35D10.4	706|1219|1402	0.9111|0.9355|0.9474
C35D10.5	719|721	0.9545|0.9091
C35D10.6	367|663	0.9318|0.9048
C35D10.7a	938	0.9091
C35D10.7b.1	1093	0.9
C36A4.4	110|615|669|1033|1497|1603|1667	0.9268|0.9263|0.9355|0.9793|0.9677|0.9223|0.903
C36A4.5	389|983|1430|1613|2207|2210|2398|2522|2606|2634|2638	0.925|0.9032|0.9167|0.9535|0.9355|0.9615|0.9444|0.9153|0.9333|0.9375|0.9583
C36A4.8b	353	0.9375
C36A4.9a.1	352|454|489|633|695|777|951|1436|1470|1555|2016|2106	0.9194|0.9394|0.9697|0.9241|0.9286|0.9238|0.9333|0.9238|0.9245|0.9259|0.968|0.9167
C36A4.9a.2	438|1191|1965|2055	0.92|0.92|0.9167|0.9167
C36A4.9b	1392	0.9062
C36B1.11	89|898	0.9072|0.9355
C36B1.12b	1892|1968|2001	0.9|0.9444|0.9143
C36B1.1c	980|1256|1319|1804	0.9487|0.9286|0.9623|0.9394
C36B1.3	532|920|926	0.9156|0.9867|0.9404
C36B1.4.1	87|121|738|819|829	0.9389|0.9022|0.9694|0.9612|0.9565
C36B1.5	528|1035|1312	0.9524|0.9286|0.9057
C36B1.7	283|597	0.9231|0.9
C36B7.6	1114	0.9048
C36E6.3	333|633|752|944|1190	0.9231|0.9375|0.9333|0.9107|0.9744
C36E6.5	327|484	0.9854|0.9918
C36E8.1.1	1606|1771|1927|1944|2410	0.907|0.977|0.9778|0.9231|0.9595
C36E8.1.2	1898	0.9091
C36E8.3	197	0.9048
C36E8.5.1	151|271|469|774|805|836|1178|1181|1346|1457	0.9255|0.9114|0.9719|0.9419|0.9044|0.9292|0.9831|0.9429|0.9355|0.9554
C36E8.5.2	255|453|733|758|767|789|792|1162|1441	0.9057|0.9459|0.9048|0.922|0.9113|0.932|0.9|0.9565|0.9167
C36E8.5.3	135|453|473|758|789|1162|1330|1441	0.9|0.9231|0.9|0.9007|0.9213|0.96|0.9231|0.92
C36E8.5.4	255|453|758|820|1162|1330|1441	0.9189|0.963|0.9231|0.9274|0.974|0.9342|0.9
C36F7.2.1	782	0.9259
C37A2.4a	965|1111|1292|1295|1576	0.9556|0.9048|0.9429|0.9118|0.9268
C37A2.7	356|380	0.978|0.9726
C37A2.8a	147|318|954|1099	0.9508|0.9455|0.9032|0.9048
C37C3.1a	1583	0.9091
C37C3.2a.1	75|339|1569	0.9474|0.9333|0.9167
C37C3.6a.1	3577|3684|3772|3802|4139|4394|4640	0.931|0.9259|0.92|0.9048|0.9143|0.9375|0.913
C37C3.6a.2	3271|3546|3771|4092|4099|4101|4108|4363|4609	0.9|0.9091|0.9167|0.9231|0.913|0.92|0.9091|0.9231|0.913
C37C3.9	579|742	0.9444|0.9211
C37E2.1.2	707	0.9048
C37H5.5.2	39	0.9091
C37H5.6a	518|599|1065|1593	0.9733|0.9149|0.9692|0.9529
C37H5.6b	345|426|892|1420	0.9123|0.9022|0.9683|0.9674
C37H5.8	995|1894|2041|2147|2281	0.9487|0.9412|0.92|0.9589|0.9211
C38C10.2	688|767|939|1067|1082|1777|1782	0.9113|0.974|0.9302|0.9062|0.9253|0.9167|0.9412
C38C10.4	1554	0.9
C38C3.5a.1	445|647|777|1203|1268	0.9028|0.963|0.9028|0.9441|0.9619
C38C3.5a.2	1254	0.9048
C38C3.5c	572	0.9424
C38C6.2a	1369|1703|1758	0.9259|0.931|0.9
C38D4.1a	1596	0.9048
C38D4.3	2566|3537|4756	0.9333|0.9259|0.9091
C38D4.4	31|90|556|964|1327	0.92|0.9333|0.9268|0.963|0.9512
C38D4.6a.2	414|417|420|423|733|914|1009|1186	0.9506|0.9706|0.9608|0.9286|0.9286|0.9608|0.9091|0.9574
C39B5.5	206|363|453|458	0.9286|0.9592|0.9388|0.973
C39B5.6	110|750	0.92|0.9259
C39D10.7.1	479|839|1127|1684|2543|2547|2550|2766|3377	0.9692|0.9091|0.9625|0.9412|0.9412|0.902|0.9583|0.9726|0.9706
C39D10.7.2	479|803|839|1127|1206|1684|1707|1946|2385|2543|2547|2550|2676|2680|2766|3212|3259|3377	0.9815|0.9516|0.9333|0.9801|0.942|0.9549|0.9135|0.9315|0.9048|0.9365|0.954|0.96|0.9014|0.9123|0.9769|0.9512|0.9027|0.9828
C39E9.11	170|172|437|557|681|1390	0.9259|0.9753|0.9459|0.913|0.9286|0.9104
C39E9.12	826|914	0.9|0.9383
C39E9.13	73|76|120|122|246|988|1027	0.9024|0.95|0.9562|0.9211|0.9073|0.9849|0.9545
C39E9.14a.1	513|944|1366|1367	0.9718|0.9483|0.9143|0.9444
C39E9.14b.1	490|1337|1338	0.9444|0.9259|0.9091
C39E9.8a	119	0.9487
C39E9.8b	85|562	0.95|0.9333
C39F7.4	60|121|1026	0.9127|0.9|0.9
C39H7.1	108|628|840	0.925|0.9231|0.9231
C40H1.5	45	0.931
C40H1.6	122|519	0.9556|0.9412
C41C4.10a	557|705	0.9167|0.9167
C41C4.4a	3270	0.9091
C41C4.7a	370|660|765|925|1107	0.9|0.9455|0.9231|0.9897|0.9
C41C4.8.1	97|148|637|722|1139|1534|1572|1999|2025|2090|2324|2519|2529	0.913|0.9054|0.9138|0.92|0.9231|0.9065|0.9091|0.9091|0.9338|0.9504|0.9|0.9286|0.9318
C41C4.8.2	429|648|694|1065|1286|1367|1460|1498|1895|1925|2016|2445|2455	0.918|0.9429|0.9217|0.9565|0.9118|0.9266|0.9423|0.9213|0.916|0.9259|0.9478|0.9595|0.9464
C41D11.2	424|714|1423	0.9|0.9348|0.9556
C41D11.5	600|815|832	0.963|0.9091|0.9
C41D11.7	1926	0.913
C41D11.8	362|462	0.9|0.9394
C41G7.1b	556|615	0.9438|0.9286
C41G7.2.1	415|853|919|1083|1156|1331|1333	0.9388|0.9091|0.9167|0.9048|0.9184|0.9143|0.9559
C41G7.2.2	232|391|772|829|895|1132|1305|1307|1309	0.9062|0.9324|0.9348|0.925|0.9412|0.9296|0.9028|0.9516|0.9732
C41G7.3	553|612|1115|1126	0.9167|0.913|0.9048|0.9412
C41G7.9a.1	237|447	0.9535|0.9661
C41G7.9b	110|113|296|506	0.9091|0.9062|0.9753|0.9828
C41H7.6	388|832|1051	0.9259|0.9|0.9231
C42C1.10a.2	42|252|294|546|888|1015	0.9091|0.9483|0.92|0.9583|0.9545|0.9623
C42C1.11a.2	485|695	0.9|0.9048
C42C1.12	195|206	0.9167|0.9677
C42C1.13b	261	0.9048
C42C1.15	559|585	0.913|0.9091
C42C1.8.1	435|656	0.9091|0.9048
C42C1.8.2	444|470|656|867|1557|1559	0.9|0.9048|0.9412|0.9333|0.9211|0.9231
C42D4.1.1	120|132|675|819|868	0.9615|0.9429|0.901|0.9535|0.9459
C42D4.1.2	772	0.9259
C42D4.8	585|1288|4068	0.9|0.9091|0.9355
C42D8.2a.1	192|209|212|658|720|779|1084|1204|1227|1321|1343|1399|1655|1773|1840|1843|1918|2485|2610|2654|2752|3038|3354|3356|3395|3531|3652|3780|3861|4298|4364|4535|4773|4846	0.971|0.9032|0.9752|0.9785|0.9167|0.9506|0.9149|0.92|0.9362|0.9615|0.9279|0.92|0.9302|0.9074|0.9208|0.9671|0.9674|0.9423|0.9694|0.9238|0.987|0.9583|0.9324|0.9626|0.9467|0.9141|0.952|0.9123|0.9402|0.9365|0.9018|0.9317|0.9283|0.9444
C42D8.2a.2	145|192|212|526|658|720|779|1084|1227|1319|1321|1343|1399|1655|1773|1843|1918|2485|2507|2610|2654|2752|2954|3038|3354|3356|3395|3652|3780|4051|4298|4364|4773|4846	0.9375|0.9778|0.9221|0.9365|0.9909|0.9394|0.9292|0.9394|0.9659|0.905|0.9877|0.9171|0.9818|0.9545|0.9014|0.9723|0.9681|0.9559|0.9079|0.9859|0.9051|0.9924|0.9117|0.989|0.9243|0.9731|0.9511|0.9084|0.9007|0.9355|0.9457|0.9053|0.927|0.9665
C42D8.8a	469|1014|1041|1043|1173|1195|2002|2127|2294|2423	0.9|0.9268|0.961|0.967|0.913|0.9459|0.9574|0.9412|0.9714|0.9157
C43E11.1	372|1796|1803|1820	0.9259|0.913|0.9375|0.925
C43E11.10	271|869|1292|1415|1635	0.9286|0.9375|0.9211|0.9048|0.977
C43E11.11.2	319|1957	0.931|0.9231
C43E11.12a.1	88	0.9231
C43E11.4	123|195|353|1164	0.9636|0.9149|0.9375|0.9394
C43E11.7	86|507	0.9535|0.913
C43E11.8	112|114|1306|1693|1743|1747	0.9375|0.9149|0.9211|0.9429|0.9231|0.9091
C43E11.9	31|386|559|654	0.95|0.947|0.9024|0.9608
C43G2.1a.1	447|824|830|1343	0.9111|0.9167|0.92|0.9
C43G2.1a.2	417|1313	0.9512|0.9375
C43G2.1a.3	1153	0.9
C43H6.1a	392|1206|1411	0.9|0.913|0.9259
C43H8.1	171|397	0.9091|0.9048
C43H8.2.1	594|677|1032|1033|1036|1037	0.9286|0.9574|0.9455|0.9565|0.9492|0.9592
C44B12.1	161|419|455|478|528|685	0.9432|0.9955|0.9587|0.9852|0.921|0.9566
C44B12.2a	130|465|922|946|1054	0.9355|0.9652|0.9364|0.9378|0.9155
C44B12.5	114|117|205|229|397|407|462|681|684|697|777|780|782|864|897|939|1002	0.9904|0.9961|0.907|0.9608|0.9|0.9734|0.9111|0.9963|0.9858|0.9733|0.996|0.9972|0.9286|0.9166|0.908|0.9843|0.9333
C44B7.1	263	0.9429
C44B7.10.1	43|120|476|906|955|1263|1462	0.9794|0.9856|0.9|0.9522|0.9218|0.9388|0.9355
C44B7.10.2	102|888|937|1156|1256	0.9091|0.9375|0.9211|0.9048|0.9
C44B7.11	2454	0.9
C44B7.12	702|1585|1589	0.931|0.9032|0.9434
C44B7.5	173|176|339	0.9253|0.9528|0.9094
C44B7.8	1339|1341|1485|1506|1507	0.9167|0.9583|0.9231|0.94|0.9516
C44B7.9	998|1576	0.9048|0.9091
C44C1.1	63|66|209|793|795	0.9259|0.9302|0.9512|0.9167|0.913
C44C1.4a	117|1258	0.9|0.9231
C44C1.5a.1	607|675|815|818	0.9286|0.9|0.9091|0.9459
C44C10.1	105|711|791	0.9|0.9048|0.9231
C44C10.9b	794	0.9231
C44C11.1a	439	0.9
C44E4.3	228|501|662|870	0.955|0.9722|0.9487|0.963
C44E4.4.1	512	0.9259
C44E4.4.2	396|510|512|1097	0.9346|0.9|0.9479|0.9175
C44E4.5	290	0.9091
C45B11.1a	1527	0.9259
C45B11.1b	1523	0.9
C45B11.3.1	994	0.9
C45B2.1	70|99|100|371	0.9531|0.9132|0.9449|0.9664
C45B2.2	51|67|263	0.9792|0.95|0.9595
C45B2.5	559	0.913
C45G3.1	2352|3352|3674	0.9091|0.9|0.9062
C45G3.5	246|250|1570|1718	0.9348|0.9649|0.9184|0.9623
C45G9.12	148|149	0.931|0.9
C45G9.2	151|720|742|914|915|1095	0.9091|0.9259|0.9231|0.9556|0.9474|0.9412
C45G9.5	135|267|408	0.931|0.9104|0.9375
C45G9.6b	838	0.9375
C45G9.9	385|710|839	0.9388|0.9118|0.9231
C46A5.5b	649	0.9032
C46A5.6	251	0.9474
C46A5.9	387|461|1395|1974|2699	0.9474|0.9333|0.9167|0.9474|0.9189
C46C2.5	500	0.9286
C46E10.1	264	0.9048
C46F11.2a	728|746|1000|1003|1192|1299	0.9091|0.9636|0.9333|0.9318|0.975|0.9556
C46F11.2b.1	1099	0.9286
C46F11.2b.2	1234	0.9167
C46F11.3	596|626|672|777|837	0.913|0.9231|0.9535|0.9592|0.9184
C46F11.5a	445|848|857|1217	0.9167|0.913|0.9032|0.9143
C46F2.1	718|719	0.9231|0.913
C46G7.1	222	0.9911
C46G7.2	140|248|262|419	0.9044|0.9388|0.9259|0.9231
C46G7.4a	2657	0.9286
C47B2.3.1	234|705|906|912|980|1097|1146|1149|1205|1262|1418	0.9375|0.9172|0.9053|0.9811|0.9747|0.9545|0.9858|0.9753|0.931|0.9474|0.9776
C47B2.3.2	604|949|1150|1156|1224|1274|1304|1341|1390|1393|1449|1506|1662	0.9094|0.9463|0.9|0.9735|0.963|0.9069|0.954|0.9765|0.9951|0.9839|0.9444|0.972|0.985
C47B2.3.3	98|644|650|718|798|835|884|887|943|1000|1156	0.9286|0.9286|0.9865|0.9318|0.9444|0.9231|0.987|0.9615|0.9091|0.9672|0.9796
C47B2.4	599|864|949|950	0.9506|0.9231|0.9545|0.9763
C47B2.5.1	158|288|478|524|571|775	0.9167|0.975|0.9032|0.9074|0.9452|0.9462
C47B2.6a	313|314|353|1229|1230	0.9706|0.9683|0.9167|0.9649|0.9091
C47B2.6b	181|317|318|1233	0.9231|0.9375|0.9348|0.9429
C47D12.2	732|831|1097|1406|1467|1488|2060	0.9|0.9048|0.9444|0.94|0.9474|0.9375|0.9024
C47D12.6a	1717|2335	0.9231|0.9167
C47D12.6b.1	99|1668	0.9|0.9333
C47D12.6b.2	2200	0.9048
C47D12.8.1	2688	0.9048
C47E12.1.2	320|387|480|660|1085|1643	0.9714|0.9493|0.9528|0.9469|0.9579|0.9208
C47E12.2.2	323	0.92
C47E12.3a	1556|1868	0.9048|0.9167
C47E12.4a	1181|1183	0.9318|0.9535
C47E12.4c.1	1407|1409	0.9286|0.9333
C47E12.4c.2	1382	0.9394
C47E12.4c.3	1363	0.9355
C47E12.4c.4	1343	0.92
C47E12.4d.3	1164	0.9091
C47E12.5a.1	303|797|1233|1327|1736|2369|2765|2876|2915|2966|3254|3346|3439	0.931|0.9524|0.9659|0.9024|0.9677|0.9|0.9394|0.9231|0.9231|0.9661|0.9245|0.9245|0.9062
C47E12.5a.2	1647|2105|2676|2877	0.9375|0.9048|0.9|0.9286
C47E12.5b.1	3257	0.9
C47E12.7	942|1101	0.9231|0.9167
C47E8.4a.1	372|665	0.9143|0.925
C47E8.4a.2	329|622|977	0.9048|0.9474|0.9091
C47E8.5.1	272|1099|1418|1548|1551|1582|1661|1831|2041|2160	0.925|0.9273|0.9548|0.9208|0.9818|0.9296|0.9925|0.9162|0.9516|0.9672
C47E8.5.2	734|1081|1400|1530|1533|1564|1643|2142	0.9062|0.9429|0.9291|0.9091|0.9718|0.931|0.9877|0.9231
C47E8.5.3	421|1248|1567|1700|1731|1810|2190|2306|2309	0.9592|0.9|0.9504|0.986|0.945|0.9887|0.9195|0.9032|0.9508
C47E8.5.4	146|1292|1425|1456|1535|1705|2031|2034	0.9048|0.9091|0.9661|0.932|0.9886|0.917|0.9|0.9375
C47E8.7.1	1008|1072|1650	0.9048|0.9091|0.9583
C47G2.4	704|1332	0.9487|0.9394
C48A7.2a.1	2339	0.9
C48B4.1	959	0.9167
C48B4.10	634	0.931
C48B4.11	490|574	0.9412|0.9487
C48B4.6	26|28|499|539	0.9355|0.9211|0.9545|0.9512
C48B4.7	33	0.967
C48B4.9.1	495|626	0.9231|0.9
C48B6.2	55|191|272	0.9429|0.9744|0.9434
C48B6.3	775|813	0.92|0.913
C48D1.2a	823|1464|1553|1554|2048|2424	0.9091|0.9167|0.9394|0.9615|0.9333|0.92
C48E7.1	169|346|395|667	0.9167|0.9556|0.9639|0.9225
C48E7.11.1	124|187	0.9444|0.9167
C48E7.2.2	439|453|1284|1578	0.92|0.9231|0.9286|0.9556
C48E7.3	172	0.9167
C48E7.7	154|238|444|531	0.9761|0.989|0.9259|0.9537
C49A1.10	492	0.9375
C49C3.1	1444|1551	0.9|0.9259
C49C3.4a	1718	0.9167
C49C3.6	175|573|609	0.95|0.9136|0.9298
C49C3.7	275|782	0.9333|0.9245
C49C3.9	455	0.9032
C49F5.1.2	644|684|698|959|1074|1459|1684|1968	0.9346|0.983|0.9189|0.9926|0.9178|0.9904|0.9655|0.9021
C49F5.7	346|360	0.9573|0.9286
C49G7.3	28|30|274|276|324|327|395|627|672	0.9091|0.9286|0.9123|0.9149|0.9726|0.962|0.9474|0.9167|0.9577
C49H3.11.1	12|53|131|263|628|718|719	0.9363|0.9326|0.9184|0.9898|0.9753|0.9275|0.96
C49H3.11.2	6|257|622|713|916	0.9259|0.9859|0.9604|0.9282|0.9286
C49H3.3.1	227	0.9737
C49H3.3.2	224	0.9508
C49H3.6a	1258|1449	0.9091|0.9167
C49H3.8	128|1118	0.9333|0.931
C49H3.9	1066|1067	0.96|0.9412
C50B6.2	122|197|518|812|1073|1235|1262|1505|1508|1562|1643	0.9231|0.9833|0.9792|0.9659|0.9842|0.917|0.9286|0.9048|0.9683|0.9681|0.9423
C50B6.3b	646|1020|1829	0.9|0.9|0.9535
C50B8.1	16	0.9048
C50B8.2	74|425|791|888	0.9062|0.9556|0.9041|0.9247
C50B8.3	299	0.9048
C50C3.6	2356|3706|5755|6056|6250	0.9048|0.913|0.9231|0.9535|0.9167
C50C3.8	13|15|49|515|913|1006|1082|1304|1438|1439|1441|1442|1674|1677	0.9211|0.925|0.9111|0.9459|0.9|0.9315|0.9423|0.9403|0.9116|0.9116|0.96|0.9408|0.9221|0.9781
C50D2.5	335	0.961
C50E3.11	245|607|608|734	0.9231|0.9189|0.9118|0.9333
C50E3.5	1460	0.94
C50F2.2	2269|2376|2398	0.9|0.9048|0.9394
C50F2.3	225|694|1439	0.92|0.95|0.9
C50F4.11	507|1064|1065|1123|2089	0.9333|0.9348|0.9318|0.931|0.9167
C50F4.13.1	191|378	0.9661|0.9231
C50F4.14b	743|869|918|936|1150	0.9348|0.9118|0.9798|0.9259|0.9545
C50F4.16	1096|1356|1362	0.9259|0.9412|0.9259
C50F4.5	129|476	0.9649|0.9537
C50F4.7	415|431	0.928|0.9643
C50F4.8	203	0.9333
C50F7.4	21|501|572|783|1227	0.9796|0.9245|0.9429|0.931|0.9375
C50H2.10	228|245	0.9565|0.9231
C50H2.12	227|244	0.9565|0.96
C51E3.9a	288|644	0.9|0.931
C52A10.1	1001	0.9091
C52B11.5	778|816	0.9444|0.9535
C52B9.4	175|1069|1236|1463|1927	0.92|0.9118|0.9|0.931|0.9286
C52E12.1	1706|2254	0.9231|0.9394
C52E12.3.1	158|592|655|1101	0.9048|0.9091|0.9|0.9286
C52E12.4	3836	0.9167
C52E4.1	372|640|766|1037	0.9535|0.9517|0.9255|0.9302
C52E4.3.1	267|324|346|428|433|547|614|717	0.9457|0.9429|0.9145|0.9864|0.9204|0.9286|0.9846|0.9563
C52E4.3.2	181|300	0.9259|0.9143
C52E4.4.1	66|154|416|418|1237|1350|1395|1421	0.9531|0.9324|0.9259|0.9381|0.9542|0.9533|0.9179|0.9059
C52E4.4.2	1184|1297	0.9464|0.9362
C52E4.5.1	604|1326	0.9091|0.9333
C52E4.5.2	1120	0.9
C52E4.6a.1	198|449|1493	0.9032|0.9231|0.9091
C52G5.2	105	0.9143
C53A3.2	60|941	0.9773|0.9107
C53A5.1.1	195|358	0.9|0.9501
C53A5.1.2	358	0.9635
C53A5.1.3	187|350	0.9275|0.9524
C53A5.16a	31|911	0.9|0.92
C53A5.17	797	0.92
C53A5.3	1033|1458|1462	0.9074|0.9245|0.9726
C53B4.5	195|407|454|455|508|553	0.9515|0.9195|0.9158|0.9137|0.9135|0.9418
C53B7.3a	632|789	0.9333|0.9091
C53B7.4	91|301|327|334	0.9444|0.9044|0.9|0.9207
C53C9.2.2	1565	0.9167
C53D5.6	124|134|765|793|1561|1820|1823|2168|2694|2783|3023|3065|3067|3069|3609	0.9403|0.931|0.9259|0.9298|0.9216|0.9375|0.9375|0.9457|0.9359|0.908|0.9302|0.9219|0.9125|0.9368|0.9595
C53D6.4a	428	0.9512
C53D6.7	73|204	0.9048|0.9167
C53H9.1.1	210|236|249|362	0.9502|0.9356|0.9978|0.9471
C53H9.1.2	208|234|247	0.952|0.9107|0.9908
C53H9.2a	140|763|1465|1550|1594|1595	0.9231|0.9324|0.9649|0.9091|0.9048|0.9028
C53H9.3.1	190	0.9167
C54C6.1.2	40|253	0.9125|0.9643
C54C6.2	311|562|976	0.9167|0.9286|0.9355
C54C6.6	617	0.913
C54D10.1	99|100|112|376	0.9107|0.9231|0.9512|0.96
C54D10.3	45|174|340|343	0.9302|0.955|0.9515|0.9383
C54E4.2a.1	156	0.9091
C54G10.2a	570|657|1582|1649|2055	0.925|0.9608|0.9615|0.9062|0.9474
C54G10.3b	220|364|2436	0.9143|0.9429|0.9259
C54G4.1d	421|830|1003|2230|2342	0.9048|0.9091|0.9091|0.9091|0.9
C54G4.7.1	659	0.9048
C54G4.8	201|312|327|706|708|753|1230	0.9634|0.9444|0.9302|0.9048|0.9139|0.9483|0.9375
C54G4.9	519|1038|1151|1153|1402|1403	0.9231|0.913|0.9643|0.96|0.9118|0.9535
C54G6.5.1	58|187|213	0.9205|0.9948|0.9565
C54G6.5.2	185	0.9853
C54H2.5.1	108|139|387|1046|1202|1257	0.9048|0.9048|0.9048|0.9412|0.9365|0.9231
C55A6.1.1	691|728	0.9167|0.9118
C55A6.1.2	515|628|665	0.9184|0.9268|0.9306
C55A6.12a	437|572	0.9365|0.9783
C55A6.2b	775|778|1437|2116	0.9318|0.9355|0.9412|0.931
C55A6.9	521|778|960|1449	0.9302|0.9483|0.9333|0.9559
C55B6.2	748|767|1745|1759	0.931|0.9394|0.9375|0.9143
C55B7.1	1892|2363	0.9375|0.9459
C55B7.3	982	0.9
C55B7.4a	67|481|688|803|904|906|1090|1258|1310|1311	0.9028|0.9235|0.9018|0.9164|0.9263|0.9635|0.9822|0.9911|0.9842|0.9839
C55B7.4b.7	1043|1095	0.931|0.913
C55B7.5.1	193|1042|1398|1438|1439|1546	0.9091|0.9512|0.9355|0.9608|0.9149|0.9355
C55B7.8	598|599|667|797|890|1106	0.9111|0.9286|0.9091|0.9091|0.9184|0.9024
C55B7.9a.1	150	0.9
C55B7.9a.2	1037	0.9167
C55C3.5a	75|76|738|740|818|948|1106|1703|1771	0.9167|0.9524|0.9318|0.9219|0.9219|0.9231|0.9079|0.9155|0.9565
C55F2.1b	119|824|890|1879	0.9048|0.9474|0.9231|0.913
C56A3.4a	670|808|813	0.9091|0.9153|0.92
C56A3.5.1	101|131|389|956|1171	0.9048|0.9318|0.9259|0.9412|0.9429
C56A3.5.2	75|795	0.931|0.9167
C56A3.8a	875	0.9167
C56C10.1	331|865|1040|1861	0.9|0.9286|0.9231|0.9375
C56C10.10	1146	0.9459
C56C10.13a	183|689|1288	0.9091|0.9091|0.95
C56C10.3.1	500|819|849|953|1044|1332	0.9259|0.977|0.9583|0.9515|0.984|0.9655
C56C10.3.2	401|535|626|914	0.9091|0.9333|0.9444|0.9048
C56C10.7a.1	217|1320	0.9032|0.9167
C56C10.8.1	175|178|317|551|589|630|657|659|754	0.9958|0.9048|0.9018|0.9804|0.9753|0.9143|0.9844|0.9086|0.9769
C56C10.8.2	151|293|527|565|633|730	0.9923|0.9194|0.9268|0.964|0.9784|0.9434
C56C10.9	894	0.9474
C56E6.2.1	132|186|863	0.913|0.9|0.9048
C56E6.3b	492|1006|2113	0.913|0.9286|0.9512
C56G2.15	685	0.9259
C56G2.6a.1	617|903|1009|1012|1042|1312	0.9691|0.9091|0.972|0.989|0.913|0.9846
C56G2.6a.2	916	0.9487
C56G2.6b	281|673|676|976	0.9688|0.9412|0.9794|0.9759
C56G2.7a	91|318|412|658|886|923|1000	0.9652|0.95|0.9717|0.9|0.9375|0.9016|0.9
C56G7.1	174|496|570|581|624	0.9078|0.9211|0.9265|0.9588|0.9292
CC4.3.2	784	0.9167
CD4.3.1	203|267|270|272|276|407	0.925|0.9524|0.9302|0.95|0.95|0.9231
CD4.4	210|242|408|639	0.9111|0.9186|0.9348|0.9231
CD4.6	233|461|546|691|878	0.96|0.9565|0.9512|0.9348|0.9441
cTel55X.1a	47	0.9111
D1005.1	848|1430|1433|1974|2375|2709|3478	0.925|0.9375|0.9375|0.9|0.9429|0.9512|0.9535
D1007.10b	340	0.9259
D1007.12	283	0.9911
D1007.5a	1547	0.9535
D1014.3.1	408|486|889|1342	0.9286|0.9412|0.9|0.9167
D1014.3.2	257	0.931
D1014.4	528	0.963
D1014.8	464|965|1402	0.9286|0.92|0.92
D1022.1a	278|757|1224	0.9048|0.9286|0.9038
D1022.4.1	732|848	0.9167|0.9286
D1022.4.2	682|798	0.92|0.9429
D1022.7b.1	3906|4064	0.9048|0.9
D1025.2	92	0.9605
D1025.4	39|58|85|181|197	0.9474|0.9643|0.9324|0.9231|0.9444
D1025.7	162	0.9
D1025.8	174	0.9
D1037.3.1	230|280|341|373|483|578	0.9378|0.9111|0.9231|0.9048|0.95|0.9138
D1037.3.2	213|263|356|466|561	0.9472|0.9043|0.9259|0.902|0.9036
D1037.4.1	158|205|541|680|751|962|978	0.9625|0.9407|0.9143|0.9808|0.9623|0.9294|0.9762
D1046.1c.3	1488	0.9091
D1053.1	655|658	0.913|0.9355
D1054.10	298|451|496|561	0.9678|0.9301|0.9219|0.942
D1054.11	32|44|511|514|564|698|737|767|797|842|902	0.925|0.9316|0.9263|0.9046|0.968|0.9761|0.9075|0.9627|0.9735|0.9883|0.992
D1054.13b	1241	0.9
D1054.14	23|422	0.9231|0.95
D1054.15a.1	119|225|410|1097|1098|1100|1463	0.9524|0.9403|0.9444|0.9286|0.9062|0.9091|0.9706
D1054.15a.2	58|164|349|1036|1039|1402	0.9535|0.95|0.9394|0.907|0.9286|0.9608
D1054.2.1	446|712|739	0.902|0.935|0.9501
D1054.2.2	399|772	0.913|0.9024
D1054.3a	277|412	0.9683|0.9661
D1081.7	60|420|534|547|624|761|930|957|958|960|1164|1251|1268|1312|1341|1483|1767	0.9368|0.9146|0.9057|0.971|0.9462|0.9474|0.9655|0.9103|0.9141|0.9318|0.9054|0.9265|0.9649|0.963|0.9231|0.9286|0.9732
D1081.8	497|599|1103|1310|1397|1406|1778|1874|2161|2252|2304	0.9091|0.9375|0.9388|0.9048|0.9787|0.9028|0.9714|0.9273|0.9625|0.978|0.9211
D1081.9	104|433|601|813	0.9474|0.9459|0.9589|0.9211
D1086.10a	97|479|572	0.9521|0.9922|0.9594
D1086.10c	63|265|496|589	0.9216|0.9|0.989|0.96
D1086.11b.1	432|482|599|783|841	0.9545|0.9187|0.9572|0.9457|0.9136
D1086.11b.2	442|626	0.9167|0.9
D1086.17	178|567	0.9057|0.9268
D1086.6	190|406|519|586|1062	0.9435|0.9325|0.9107|0.9823|0.9077
D1086.7	278|284|286|287|568|716	0.902|0.9143|0.9024|0.94|0.92|0.9167
D2005.3	476	0.9067
D2005.5	590|779|1037|1902|1903|1937|2792	0.9|0.9394|0.9167|0.9375|0.9375|0.9091|0.9
D2005.7	120|155|183|561|652	0.9245|0.9091|0.9429|0.9565|0.9655
D2007.1	53	0.92
D2007.4	231|238|347	0.9259|0.9529|0.9692
D2007.5.2	786|1221	0.9487|0.9048
D2013.2.1	427|1237|1363|1390	0.9091|0.913|0.9|0.9375
D2013.2.2	215|427|732|1237|1390	0.9|0.9032|0.9167|0.913|0.9143
D2013.5	145|2304|2391	0.92|0.9048|0.92
D2013.6.1	1009	0.9
D2013.7	140|170|238|423|498|543|883	0.9265|0.9358|0.9548|0.9371|0.9832|0.9697|0.9091
D2013.8a	1422	0.9048
D2013.9.1	517|897|1116|1222|1861	0.9545|0.9167|0.9512|0.9|0.9692
D2023.2a.1	598|700|858|1197|1228|1379|1469|1663|1714|2221|2224|2368|3397|3577	0.9032|0.9524|0.9589|0.9714|0.954|0.9658|0.9016|0.925|0.9143|0.9592|0.9464|0.9111|0.9717|0.9219
D2023.2a.2	743|845|1082|2756|3282	0.9167|0.9048|0.9333|0.9|0.9429
D2023.4	350	0.9268
D2023.5	226|315|381|712	0.9302|0.9091|0.9032|0.9333
D2023.6	1247|1249	0.96|0.9091
D2024.3	936	0.9
D2024.5a	98	0.9636
D2024.6.1	283|1030	0.9074|0.9375
D2024.6.2	760|983|1030	0.9231|0.9259|0.9524
D2030.1.1	906|2013	0.9091|0.9512
D2030.11.1	336|379	0.9118|0.9
D2030.5	371	0.9189
D2030.6	147|1161|1726|1736|1811|1950|2152|2264|2334	0.934|0.9541|0.9623|0.9524|0.9583|0.972|0.984|0.9444|0.9153
D2030.7	1151|1171|1241|1258|1421	0.907|0.925|0.9167|0.9608|0.9512
D2030.8.1	793|1523|1583	0.9348|0.9032|0.9516
D2045.2.1	4491	0.9091
D2045.6	403|674|833|902|1691|1894|1963|2201|2229	0.9|0.9592|0.9259|0.9444|0.913|0.9286|0.9|0.902|0.9091
D2062.6	193	0.9798
D2063.3a	100|147|153|183|644|728|968	0.9062|0.9419|0.9074|0.9211|0.9487|0.9048|0.9
D2085.3	988	0.9091
D2085.4	280|680|717|789|2157|3022	0.9048|0.9444|0.9062|0.913|0.9|0.9355
D2089.1a	339|341|1233|1419|1490|1497	0.9074|0.9167|0.9429|0.9091|0.9318|0.9759
D2092.2	352|587|770|864|955|964|1153	0.9706|0.9167|0.9647|0.9273|0.9118|0.9706|0.9
D2092.5	3556	0.9545
D2096.2a	577|704|706	0.9725|0.9623|0.971
D2096.4a	715|737|1016|1276|1287	0.9016|0.9375|0.9492|0.9362|0.9048
D2096.8	194|454	0.9277|0.9412
DH11.2.2	210|1301	0.9118|0.907
DY3.1	19|22|46|182|183	0.9655|0.9143|0.908|0.9529|0.9669
DY3.2.1	283|495|863|897|1020|1107|1737|1740|1974	0.9485|0.92|0.9205|0.9016|0.9512|0.9138|0.9355|0.9591|0.9333
DY3.2.2	1099	0.9062
DY3.7	397|1498|1743|1927|2550|2779|2814	0.9375|0.9|0.9492|0.9153|0.9388|0.9143|0.9091
DY3.8.1	171|326|356	0.9512|0.9067|0.9114
E01A2.1a	206	0.9231
E01A2.1b	275|278|833	0.9545|0.9231|0.92
E01A2.2a	262|297|801|888|1103|1215|1496|1500|1827	0.9545|0.974|0.92|0.9333|0.9556|0.931|0.913|0.9342|0.9444
E01A2.4.1	603|649|651	0.9|0.9032|0.9333
E01A2.6.1	542|544|599|1185	0.9394|0.9149|0.931|0.9167
E01A2.7	883	0.9167
E01B7.2	83|399	0.92|0.9167
E02A10.1	1318|1385|1386	0.9492|0.9286|0.9326
E02C12.13	146	0.9
E02D9.1b	210|211|264|409|677|694|742|1046	0.9467|0.939|0.9394|0.9118|0.9286|0.9268|0.9048|0.9574
E02H1.1.1	136	0.95
E02H1.3	136|137|582	0.9167|0.9231|0.9231
E02H1.4.1	140|664|665	0.9048|0.92|0.9167
E02H1.4.2	140|664|665	0.9231|0.9032|0.9
E02H1.5	306|342|482	0.9259|0.9|0.9
E02H1.6	51|98|458	0.92|0.9048|0.92
E02H1.8	71|74	0.9444|0.9205
E03H12.10	236|332	0.971|0.9231
E04A4.4a	1206|1402|2013|2431	0.9286|0.9|0.9|0.9062
E04A4.7.1	836|870|882|995|996|1035	0.9877|0.9634|0.975|0.9885|0.9901|0.9453
E04A4.7.2	217|251|376|377|416	0.9836|0.9681|0.9802|0.9871|0.9178
E04A4.7.3	172|206|331|332|371	0.9783|0.9633|0.9896|0.9871|0.9528
E04A4.8	150|380|549	0.9344|0.9396|0.9545
E04D5.1a.1	748|760|933|1230|1508|1523	0.927|0.9259|0.9231|0.9091|0.9663|0.9196
E04D5.1a.2	1488	0.9608
E04F6.3	267|268|364|400|758	0.9518|0.9385|0.9672|0.9067|0.9118
E04F6.5a.1	95|876|1203|1521|1524|1941	0.9438|0.9032|0.9222|0.9355|0.9722|0.9528
E04F6.9	353|359	0.931|0.9167
EEED8.1.1	353|499|534	0.9623|0.96|0.9367
EEED8.10a	721|1576|1698|1809	0.9474|0.9444|0.9048|0.9149
EEED8.14	94|746|927	0.9429|0.931|0.9375
EEED8.3	465|632	0.9561|0.93
EEED8.5	2202	0.9091
EEED8.7a	65|372|550|586	0.9231|0.9505|0.9167|0.9538
EEED8.9	1289	0.92
EGAP2.3.1	540|1377	0.9375|0.92
F01D4.2	1194	0.9062
F01D4.4.3	137|139|847|880|1333	0.9394|0.9143|0.9394|0.9167|0.9091
F01D4.5b.1	527|530	0.9412|0.9565
F01F1.10b	1000|1068|1098	0.92|0.9167|0.913
F01F1.11	1414|1417|1674|1682	0.97|0.9219|0.9318|0.9444
F01F1.12a.1	440|443|839|909|1079|1140	0.9114|0.9857|0.9531|0.969|0.9675|0.9231
F01F1.12a.2	565|568|964|1034|1204	0.9383|0.9857|0.9608|0.9766|0.9665
F01F1.15.1	179	0.9333
F01F1.2.1	393	0.94
F01F1.3	156	0.9
F01F1.4.1	584|673|1345	0.92|0.9231|0.9048
F01F1.5.1	10|806|861|1043	0.9444|0.9672|0.931|0.9302
F01F1.6.1	175|332|366|796|969|1214|1447|1675|1730|1737|1920	0.9157|0.9649|0.903|0.9565|0.9079|0.9091|0.9333|0.9007|0.9272|0.9375|0.9703
F01F1.6.2	1535	0.9032
F01F1.7	1040|1180|1279|1568|2107|2120	0.9474|0.9524|0.913|0.96|0.9565|0.9333
F01F1.8a.1	405|993|1249|1252|1339|1395|1404|1435|1566|1608|1709|1742	0.9738|0.9056|0.9544|0.9625|0.9764|0.913|0.9574|0.9762|0.9487|0.9178|0.9733|0.9754
F01F1.8a.2	1705	0.9032
F01F1.8b.1	1247|1707	0.9286|0.9333
F01F1.9a	119|122|148|155|158|642|680|683|686|1079|1179|1271|1415|1455|1458|1459|1526	0.9767|0.9118|0.9062|0.9412|0.9048|0.9|0.9091|0.9789|0.9775|0.92|0.931|0.9286|0.9091|0.9718|0.9695|0.9855|0.95
F01F1.9b	1328|1347|1348	0.9048|0.913|0.931
F01G10.1.1	355|510|513|516|636|693|875|978|996|1186|1188|1230|1357|1380|1410|1575|1731|1740|1803|1845|1919	0.9867|0.9933|0.9812|0.9815|0.9211|0.9329|0.976|0.9747|0.9793|0.9756|0.9692|0.973|0.9048|0.9452|0.9533|0.957|0.9248|0.9516|0.9744|0.9403|0.902
F01G10.1.2	334|489|492|495|854|1389|1719|1782	0.9231|0.9706|0.9259|0.9167|0.9649|0.9423|0.9429|0.9167
F01G10.8b	285|450	0.9091|0.9167
F01G12.2b	56	0.9091
F01G12.5a.2	4966|5054	0.9091|0.9355
F01G12.5b.2	4841|4973|5057	0.913|0.9143|0.9394
F01G4.1	2157|2508|3010|3013|3017|3020	0.9286|0.9048|0.9|0.9048|0.9259|0.9412
F01G4.2a	327|329|597|598|649	0.9167|0.9684|0.9674|0.9628|0.9583
F01G4.3	2495	0.9231
F01G4.4b	1486|1603	0.9|0.9048
F01G4.5	742	0.9474
F01G4.6a.2	120|399|443|455|458|657|814|859|920|1267	0.9399|0.9467|0.9826|0.9358|0.9747|0.9662|0.9677|0.9854|0.9192|0.9047
F01G4.6a.3	32|443|455|458|657|749|814|859|1267	0.9224|0.9701|0.9355|0.9706|0.971|0.9286|0.9459|0.9878|0.9292
F01G4.6b.2	1233	0.9459
F01G4.6b.3	1233	0.9286
F02A9.2a	29|31|55|57|64|346|593	0.9524|0.9789|0.992|0.993|0.9097|0.9904|0.979
F02A9.3.1	287|448|582|645|652	0.9073|0.9536|0.953|0.9244|0.9649
F02A9.3.2	138|299|433	0.9184|0.9167|0.9268
F02A9.4a.1	45|459|721|814|996|1437|1783|1784|1962	0.9286|0.9487|0.9726|0.9692|0.969|0.913|0.9627|0.9641|0.9808
F02A9.4a.2	803|985|1772|1773|1951	0.9231|0.9574|0.9524|0.9677|0.9487
F02A9.4b.1	875|877|1002|1006	0.9167|0.9048|0.9286|0.9302
F02A9.6	28|2306|3525|4015|4016|4040	0.9048|0.913|0.931|0.9211|0.9211|0.9048
F02C9.4	446	0.9048
F02D8.4.1	638|1141	0.9|0.931
F02E8.1.1	47|125|314	0.9|0.9187|0.9765
F02E8.1.3	291	0.9732
F02E8.3	396	0.9048
F02E8.4	2352|2353	0.9091|0.9
F02E9.10c.1	258|511|1224|1312|1380|1397	0.95|0.931|0.92|0.9333|0.9459|0.9524
F02E9.4b	305|4506	0.9048|0.9286
F02E9.5a.1	198|223|224|599	0.913|0.931|0.931|0.9375
F02E9.7	933|935	0.92|0.9535
F02E9.9b	1101|1344|2072|2075	0.9444|0.9459|0.9268|0.9143
F07A11.2a.1	2413	0.9
F07A11.2a.2	2240	0.931
F07A11.2b.1	791|868|1007|1299|1730|1731|1752|2291|2374|2378|2448	0.9231|0.963|0.9545|0.9394|0.9294|0.9651|0.9083|0.9286|0.9708|0.9692|0.9765
F07A11.2b.2	518|618|695|834|1012|1126|1557|1558|1599|2118|2201|2205|2275	0.9091|0.9048|0.9659|0.9143|0.9231|0.9359|0.9302|0.9432|0.9326|0.9487|0.9764|0.9355|0.9747
F07A11.3	763|1844|2040	0.9048|0.9444|0.9333
F07A11.5	140|893|937|938	0.9048|0.9429|0.9333|0.9355
F07A5.1b.1	817|1484|1486	0.9|0.9459|0.92
F07A5.1b.2	1398	0.9
F07A5.2	535	0.9375
F07A5.7a.1	1301|2717	0.913|0.9
F07A5.7a.3	329|504|624|651|1301|1694|1757|1809|1877|2150|2177|2632|2717|2889|3005|3072	0.9801|0.902|0.9605|0.9852|0.9844|0.9167|0.951|0.9775|0.92|0.9268|0.9574|0.978|0.981|0.9029|0.9216|0.9143
F07A5.7a.4	329|624|651|1301|1757|1809|2150|2177|2434|2632|2717|2889|3005	0.98|0.9556|0.9655|0.9846|0.9231|0.938|0.9355|0.9268|0.9245|0.9645|0.9727|0.9|0.9248
F07A5.7b.3	1719	0.9048
F07C6.3	583	0.9375
F07D10.1	35|570|574	0.9524|0.9403|0.9346
F07E5.5	125|563|596	0.907|0.9429|0.9459
F07F6.4	607|1094|1561|1859|1862|2220|2360	0.9048|0.9412|0.931|0.9259|0.9091|0.9512|0.9167
F07H5.10	193|194|746	0.9143|0.9429|0.9231
F07H5.9a	363	0.9444
F08A8.4.1	261|2019	0.9091|0.92
F08A8.7.1	174|216|451	0.9107|0.9062|0.9535
F08B12.4a	138|195|198|261|358|367	0.9302|0.9333|0.9759|0.9512|0.9041|0.9639
F08B12.4b.1	138|195|198|261|358|367|396	0.9429|0.9091|0.9756|0.9615|0.9014|0.9367|0.9206
F08B4.5	564|1442|1607|1609|1723	0.9|0.9167|0.9211|0.9211|0.9167
F08B4.7	146	0.9643
F08B4.8	327	0.9176
F08B6.1	264	0.913
F08B6.4a.2	1822	0.9429
F08B6.4b	540|613|1229|1255	0.9763|0.988|0.949|0.9455
F08C6.2a	481|898|986	0.94|0.9091|0.9091
F08C6.6	139|468|469|673|709	0.9149|0.9369|0.9487|0.9091|0.9315
F08F3.2a	707|1893	0.9286|0.931
F08F3.3.1	194|371|752|791	0.9643|0.9622|0.9846|0.907
F08F3.3.2	157|715	0.9091|0.9512
F08F3.4	260|262|287|944|1013	0.9362|0.9508|0.9259|0.9286|0.9216
F08F3.6	210|634	0.9|0.925
F08F8.10a.1	387|978|1090	0.9268|0.902|0.9348
F08F8.2	39|1078|1830	0.9348|0.9608|0.9091
F08F8.4	395|456|517|689	0.9518|0.9722|0.907|0.9259
F08F8.7.2	86|147|665	0.9444|0.9455|0.9211
F08F8.9a.1	643|652|1441|1924	0.9667|0.9184|0.931|0.9231
F08G5.1a.1	816|1138	0.9286|0.9231
F08G5.1a.2	786|900	0.9091|0.9
F08H9.1	1679	0.9
F08H9.2	261|263|265	0.9302|0.9787|0.9326
F08H9.7	617|689|857|861	0.9167|0.9211|0.9286|0.9565
F09A5.9	430|432	0.9636|0.9149
F09B9.2a	1318|1656|1976|1994|2580|2691|2748	0.9048|0.9444|0.9091|0.9231|0.9512|0.9355|0.931
F09D1.1	47|1427|1430|1712	0.9348|0.9149|0.9412|0.931
F09D12.1	420|424|515	0.9365|0.9537|0.9
F09E10.3	131|185|186|710|968	0.9791|0.9542|0.9292|0.9379|0.9032
F09E5.1	1928|2275	0.9231|0.9091
F09E5.11	502|630	0.9495|0.9455
F09E5.13	730	0.9535
F09E5.15a.1	294|386|772	0.9341|0.9241|0.9529
F09E5.15b	280|355|833	0.9014|0.9206|0.951
F09E5.15c	234|326|712	0.9028|0.9412|0.92
F09E5.17	35|174	0.9636|0.9565
F09E5.2	984|993	0.9091|0.931
F09E5.3	146|648|772|1003	0.9026|0.9512|0.9699|0.9
F09E5.5.1	748|788|1846|2090	0.913|0.9286|0.9062|0.9091
F09E5.7.1	273|556|1155	0.95|0.92|0.9032
F09E8.2a	656	0.9048
F09E8.2b	110|571|656|816	0.9091|0.9286|0.9423|0.9556
F09F7.2a.2	46|71|73|80|82|306|413|415|594|657|865|871	0.969|0.9848|0.9333|0.9399|0.9735|0.996|0.9221|0.988|0.9036|0.96|0.907|0.9844
F09F7.3.1	827|2528	0.9091|0.9091
F09F7.3.2	3402	0.9
F09F7.4a.1	448|464|961|1156|1391|1441	0.9167|0.9272|0.9452|0.9138|0.9375|0.9505
F09F7.4a.2	1395	0.9048
F09F7.6	154	0.92
F09F7.7a	465	0.9091
F09G2.2	161|443|686	0.9661|0.9733|0.9437
F09G2.4	486|2551	0.9259|0.9388
F09G2.8a	693|867|1205|1589	0.92|0.9231|0.931|0.9149
F09G2.9	232|433|601|619|622|1019|1372	0.94|0.9126|0.9385|0.9792|0.9759|0.9211|0.9118
F09G8.3	623|1067	0.913|0.9143
F09G8.7	213	0.9574
F09G8.8	1596	0.9048
F10A3.17	548	0.9231
F10B5.1.1	87|174|374|378	0.9872|0.9546|0.9037|0.9196
F10B5.1.2	69|156|356|360	0.9694|0.9445|0.9125|0.9099
F10B5.5	727|831|1024|1071	0.9583|0.9375|0.9104|0.9138
F10B5.6	225|400|402|1280|1350|1762|1768	0.9038|0.9231|0.931|0.9318|0.9091|0.9167|0.9302
F10B5.8	104|494|1048|1371|1394|1443|1547|1649|1805	0.9091|0.9434|0.9077|0.9694|0.9701|0.96|0.9574|0.9|0.9333
F10C1.2a.1	147|328|795|797|807|1738|1785	0.9615|0.95|0.9524|0.9024|0.9259|0.9655|0.9615
F10C1.2b	194|375|420|842|844|854|1785|1832|2133	0.9829|0.9355|0.9143|0.9792|0.9326|0.9608|0.916|0.9603|0.9189
F10C1.7a	18|68|693|1015|1436|1759|1762	0.9565|0.9388|0.9189|0.9111|0.9516|0.9592|0.9531
F10C1.7c	18|68|693|1385|1708|1711	0.9167|0.9487|0.931|0.9138|0.9535|0.9667
F10C1.9a	15|123	0.9167|0.9091
F10C2.2	655	0.9375
F10C2.4	126|945|2048|3067|3283	0.9|0.9143|0.9091|0.9231|0.9118
F10C5.1	293|675|1162|1552	0.9091|0.9231|0.913|0.9259
F10C5.2.1	816|1050|1053|1513	0.9057|0.9512|0.9636|0.9
F10C5.2.2	1497	0.9048
F10D11.1.1	64|107|116|171|761	0.9|0.9231|0.947|0.9379|0.9065
F10D11.1.2	156|746	0.9524|0.9091
F10D11.2	867	0.931
F10D2.11	55|167|545|549|1674	0.9444|0.9545|0.9333|0.9189|0.913
F10D2.9	179|182|689|996	0.9167|0.913|0.9796|0.9114
F10E7.2	285	0.9
F10E7.5.1	145|218|282|373	0.9|0.9184|0.9318|0.9286
F10E7.5.2	142|165|215|279	0.9114|0.9144|0.9237|0.94
F10E7.6	195|501	0.9398|0.9286
F10E7.7.1	18|131|140|287|346|382|385	0.95|0.9759|0.9832|0.9944|0.9319|0.9137|0.909
F10E7.7.2	124|133|280|339	0.913|0.9679|0.991|0.9112
F10E7.7.3	124|133|280|339|375|378	0.9459|0.9635|0.9889|0.914|0.9311|0.9093
F10E7.8a	2443	0.9167
F10E7.8b	547|1237|1578|2430|2449|3125	0.9|0.9394|0.9231|0.9512|0.9512|0.9
F10E9.11	154	0.9091
F10E9.3	36|194|434	0.9189|0.931|0.9355
F10E9.5	163|637|639	0.9032|0.9697|0.9701
F10E9.7.2	536|635	0.9|0.9552
F10F2.1	7622	0.9231
F10G2.1.2	128|577|715	0.9167|0.9167|0.9091
F10G7.1.1	141|802|1651|2120	0.9|0.9167|0.9545|0.9
F10G7.2	41|43|331|757|1027|1275|1543|1555|2230|2389|2422|2452|2790|2806|2944	0.9697|0.9286|0.92|0.9167|0.9884|0.9565|0.9649|0.9571|0.9231|0.925|0.9384|0.96|0.9636|0.9038|0.9278
F10G7.3	961	0.9385
F10G7.4	754|1948	0.92|0.913
F10G7.8.1	494|609|803|814|968|970|1115|1250|1342|1436	0.963|0.9694|0.9302|0.9536|0.9692|0.9296|0.9231|0.9464|0.9769|0.9322
F10G7.8.2	193|285|438|553|758|1059|1286|1380	0.9231|0.9048|0.9268|0.9322|0.9032|0.9429|0.9381|0.95
F10G8.3.1	464|713|1134|1516|1693	0.9091|0.9333|0.9444|0.9672|0.95
F10G8.5	11|462|687|734|867|1083	0.9259|0.913|0.9091|0.9355|0.9474|0.9706
F10G8.6	247|464|627|642|819|822|989	0.9487|0.907|0.9|0.9775|0.9658|0.9829|0.9184
F10G8.7.1	132|601|697	0.9375|0.92|0.92
F10G8.7.2	529|601|697|731	0.9259|0.913|0.9|0.9
F11A10.1a.1	1517|3296|4204	0.9|0.9|0.913
F11A10.2	218|384|461	0.9048|0.9367|0.9444
F11A10.3a.2	899	0.931
F11A10.5	102|415|417|875|912|1072|1339|1631|1635|1802|1836	0.9762|0.9726|0.9518|0.954|0.9355|0.9091|0.98|0.9259|0.9412|0.9512|0.9362
F11A10.7	290|413|416|1020	0.913|0.9231|0.931|0.9322
F11A10.8.1	632	0.9623
F11A3.1.1	138|573|575|945|946|1270|1638	0.9038|0.9333|0.913|0.9123|0.9483|0.9444|0.913
F11A3.2a	446|1637	0.9|0.9091
F11A5.9	64|394|1174|1259	0.9032|0.9412|0.9048|0.9355
F11C3.3.1	1539|3229|3649|4776|4899|5316|5429|5845|5963|5972|6062|6119|6205|6206|6245	0.94|0.9|0.9592|0.913|0.9048|0.9211|0.9231|0.9615|0.9577|0.9333|0.913|0.913|0.9688|0.963|0.931
F11C3.3.3	5225|6114|6115	0.9167|0.931|0.92
F11C7.5.2	398|399	0.9231|0.9062
F11E6.3.1	215|218|221|240|245|257|275|287|478|536|539|596|698|701|860|863|1025|1037|1184	0.926|0.9749|0.996|0.9639|0.9524|0.9908|0.9251|0.9357|0.9039|0.9717|0.9941|0.9885|0.9827|0.9905|0.9812|0.9901|0.9869|0.9881|0.9474
F11E6.3.2	110|113|116|140|152|182|373|431|434|491|593|596|755|758|920|932	0.918|0.9722|0.984|0.951|0.9733|0.9031|0.9167|0.9432|0.9802|0.9683|0.9432|0.9694|0.962|0.9518|0.9829|0.9831
F11E6.5	173|219|239|259|686|714	0.9565|0.9346|0.9024|0.9429|0.9574|0.9615
F11E6.7	17|610|613|715|741|1182|1609|2275|2724|2725	0.9048|0.913|0.9091|0.9231|0.913|0.9333|0.9355|0.9048|0.9111|0.9048
F11G11.11	83|443|502|564|565|854|857|858|874|876|877|962	0.9403|0.9938|0.9234|0.9254|0.9561|0.9538|0.9604|0.9329|0.9575|0.9485|0.9467|0.9032
F11G11.12	702	0.9
F11G11.2	42|144|395|539|662	0.9667|0.9726|0.9559|0.9665|0.9
F11G11.3	179|234	0.9143|0.9
F11G11.5.2	90|111|246|280|324|452|477|676|678|711	0.9062|0.9348|0.9367|0.9082|0.9524|0.95|0.9231|0.9|0.9459|0.9672
F11G11.8	56	0.9077
F11H8.1.1	580|586|913|919|1192|1193|1319|1386|1560|1563	0.9524|0.9231|0.9344|0.913|0.9464|0.9487|0.9388|0.9211|0.9333|0.9643
F11H8.3	98|270|424|874|901	0.9281|0.9565|0.9671|0.979|0.954
F12F6.1	69|880|1041|1284|2821	0.9474|0.9167|0.9574|0.9062|0.913
F12F6.5a	371|410|411|819|1008|1149|1268|1833|1836|2175|2355|2400|2948|3020	0.9333|0.9388|0.9318|0.9048|0.9167|0.9091|0.963|0.9474|0.9048|0.9318|0.9429|0.9091|0.9091|0.9512
F12F6.6	476|490|2295|2575	0.92|0.9048|0.9091|0.9138
F12F6.7.1	316|1516	0.913|0.9571
F13A7.1	133|566	0.9|0.9167
F13A7.14	521|795|927	0.9167|0.913|0.9211
F13B10.2a.1	78|80|269|360|363|603|727|803|997|1134|1194	0.9106|0.9859|0.9705|0.92|0.9293|0.9542|0.9974|0.9091|0.9648|0.9259|0.905
F13B10.2a.2	80|269|360|603|727|997|1227	0.9848|0.938|0.9167|0.9432|0.9985|0.9618|0.981
F13B10.2c	853|1083	0.9375|0.9
F13B10.2d.1	435|705	0.9375|0.9091
F13B10.2d.2	435|705|935	0.971|0.9506|0.9487
F13B12.1	650|766|852|1451	0.9275|0.9077|0.925|0.9062
F13B12.6	1960	0.9259
F13B9.8b	204	0.9286
F13D12.2a	964	0.9
F13D12.2b	560|1010|1100|1117	0.9545|0.9286|0.9231|0.9302
F13D12.3	990	0.9
F13D12.4a.1	318|703|762|776|849|1259|1443	0.9302|0.96|0.9903|0.92|0.9869|0.9259|0.9
F13D12.4a.2	283|311|604|696|755|769|832|842|1252|1436|1458	0.9|0.9405|0.9318|0.96|0.9769|0.9649|0.9348|0.9873|0.95|0.9091|0.9225
F13D12.4a.3	267|652|711|798|1208|1414|1463	0.9474|0.9452|0.9583|0.9859|0.9032|0.913|0.9032
F13D12.6.1	511|594|814|1377	0.9524|0.9583|0.9444|0.9048
F13D12.6.2	191|466|549|769|1332	0.9245|0.925|0.9184|0.9091|0.912
F13D12.7a.2	1509	0.913
F13E6.1	324|341|452	0.9|0.9452|0.9107
F13E6.5	426	0.9091
F13E9.1	112|960|1087|1509|1820	0.9302|0.9394|0.9333|0.9375|0.9259
F13G11.3	272|620	0.9242|0.9118
F13G3.10a	146	0.9062
F13G3.11	303|313|326|448	0.9483|0.9038|0.9167|0.9535
F13G3.5a.2	854|916	0.9385|0.9429
F13G3.6	321	0.9
F13G3.9	168|263|299	0.9333|0.9434|0.9268
F13H10.2a	576|579|801|837	0.9302|0.9375|0.973|0.9206
F13H10.4c	1996	0.9032
F13H10.8a.1	181|252	0.9708|0.9
F13H10.8a.2	162|233	0.9863|0.9259
F13H6.3	420	0.9333
F13H8.2	539|613|2677|2839|2842|3050	0.9091|0.9231|0.9048|0.9091|0.9412|0.9286
F13H8.3.2	101|1170	0.9091|0.9388
F13H8.7	17|196|329|332|971|1111	0.9134|0.9016|0.9863|0.9877|0.9799|0.9196
F14B4.2a.1	1255|1450|1599	0.9048|0.92|0.9355
F14B4.2a.2	22|171|821|1255|1450|1512|1599	0.9211|0.9286|0.913|0.9556|0.9444|0.9067|0.9459
F14B4.3	2537|2760	0.9355|0.9167
F14B8.6	852	0.9048
F14D12.2.2	329|376|1404	0.9048|0.9189|0.913
F14D2.1	11|42|411|494|496|772	0.9259|0.9429|0.9062|0.9512|0.9394|0.9231
F14D2.12	236|346|758|965	0.9333|0.9683|0.918|0.9206
F14D2.13b	795	0.9286
F14D2.4a	133|346|758|965	0.9286|0.9286|0.9048|0.9
F14D7.2	770	0.913
F14E5.2a	109|2668|2761|2881	0.9118|0.94|0.9|0.9048
F14E5.5	91|1062	0.9487|0.9143
F14F4.3	3009	0.9048
F14F7.1	509|582	0.9131|0.9535
F14H3.6	200|326|516|1000|1001|1002|1007	0.9397|0.9062|0.9067|0.9158|0.9407|0.9053|0.913
F14H8.1a	213|419	0.9|0.9048
F15A2.1a	175|177|243|506	0.9684|0.9438|0.9184|0.9309
F15A2.1b.1	195|263|526|670|871	0.9771|0.931|0.9391|0.9354|0.929
F15A2.1b.2	162|493|838	0.9157|0.9141|0.9038
F15A4.11	41	0.9091
F15B10.1a	160|371|383|439|652|1064|1068	0.907|0.9565|0.9167|0.9231|0.9167|0.9531|0.9286
F15B10.2a	2038	0.9167
F15B9.1	68	0.9
F15B9.10a	264|1137	0.9412|0.92
F15C11.2a.1	511|692|860|922|942|1536|1594	0.9189|0.9565|0.9123|0.9639|0.9364|0.9111|0.9
F15D3.6	415|594	0.9444|0.956
F15D3.7	69|204|291|489|491|672|721	0.9231|0.9487|0.9431|0.94|0.9143|0.92|0.9237
F15D4.2	114|173	0.9048|0.9286
F15E11.1	41	0.9032
F15E11.14	122	0.913
F15G9.1a	302|938|1011	0.9048|0.9123|0.9733
F15H10.1.1	359|419|543|554|563|662|671|755|764|951|952|988	0.95|0.9775|0.9342|0.9424|0.9304|0.9106|0.9288|0.9562|0.9333|0.9048|0.9048|0.9
F15H10.1.2	538|539|647	0.9286|0.9375|0.9286
F15H10.2	329|389|513|524|532|533|632|640|641|724|725|921|922	0.9556|0.9423|0.9008|0.9681|0.9424|0.9673|0.963|0.9333|0.9536|0.9048|0.9789|0.9754|0.9495
F15H10.3a.1	385	0.9167
F15H10.3d	95|393	0.9032|0.9474
F16A11.1a	2326|2327	0.9167|0.9231
F16A11.2a	615	0.9167
F16B4.4	215	0.922
F16D3.2.1	253|1318|2380|2399	0.9024|0.931|0.9429|0.9167
F16D3.4	379|1223|3941	0.9231|0.9|0.9388
F17A9.2	215	0.9459
F17A9.4	1074	0.9459
F17A9.5	331	0.9048
F17C11.10.1	475|579|832|1867|2113|2383|2542|2654|2896|3045	0.9231|0.9556|0.9231|0.9412|0.9286|0.9286|0.9167|0.925|0.9375|0.9057
F17C11.11a	150|196|267|695	0.9324|0.9318|0.95|0.9806
F17C11.17a.1	1171|1595	0.931|0.9298
F17C11.2.1	337	0.9
F17C11.7a.2	1335	0.9048
F17C11.8.1	478|744|1335|1574	0.9444|0.92|0.9322|0.9189
F17C11.9a.1	274|356|714|821	0.9439|0.9139|0.973|0.9727
F17C11.9a.2	230|312|670|777	0.9043|0.9292|0.9858|0.9588
F17C11.9b.1	648	0.9231
F17C11.9b.2	650	0.9375
F17C8.4.1	116|456|550|652	0.9245|0.9118|0.9038|0.9138
F17C8.9	425|901	0.9062|0.9355
F17E9.4	159	0.9895
F17E9.5	355	0.9167
F17H10.1.1	246|321|1628	0.9302|0.9487|0.9412
F17H10.2a	326	0.9211
F18A1.2d	902	0.9
F18A1.5	32|34|92|603|1244|1347|1419|1422|1749	0.9412|0.9167|0.922|0.9583|0.9433|0.9412|0.9623|0.9649|0.9787
F18A1.7	489|491|494|524|631|760	0.9677|0.988|0.9927|0.984|0.9397|0.9205
F18A1.8	413	0.9474
F18A11.1.1	296|939|1723	0.913|0.9394|0.9167
F18A11.3	336|339	0.9259|0.931
F18C12.3	227|602	0.9231|0.92
F18C5.10.1	664|706	0.9394|0.9394
F18C5.2	3110	0.9
F18E2.1a.1	711	0.913
F18E2.2	1000|1003	0.9324|0.9328
F18E2.3	1355|1788|2436	0.9355|0.9189|0.92
F18E3.7a.1	968	0.92
F18F11.1	346	0.92
F19B2.5.1	1031	0.9279
F19B2.5.2	146	0.9444
F19B6.1d	215|1348|1373|1528|2264	0.92|0.9|0.9091|0.9286|0.9268
F19B6.2a.1	388|646	0.9464|0.9683
F19B6.2a.2	224|482	0.9167|0.9423
F19C7.1	75|127|539|996	0.92|0.9733|0.9682|0.9355
F19F10.12	629|730|1196	0.9143|0.9286|0.9091
F19F10.3	192	0.913
F19F10.4.2	425	0.9167
F19F10.9	1908|2084|2145	0.9355|0.9032|0.9429
F19H8.1a	1771|1780|2268|2725|2780|2783|3111|3113|3248|3251	0.9118|0.9048|0.9091|0.9211|0.9444|0.9474|0.9355|0.9111|0.9355|0.9429
F20A1.1	168|237|303|369	0.9268|0.9211|0.9604|0.979
F20A1.10	222|272|333	0.9091|0.9636|0.9032
F20A1.9	336|369|824|991|1137|1205|1215	0.9355|0.9167|0.9043|0.9375|0.9615|0.9362|0.9661
F20B6.2	245|475|986|1089|1290|1292|1418	0.9529|0.9371|0.9563|0.9844|0.9815|0.9519|0.91
F20D1.1	499	0.9318
F20D1.9	511|552|701	0.9524|0.9388|0.9024
F20D12.12	88|91	0.9211|0.9048
F20D12.1b	1133|1327|1876|2149|2881	0.9186|0.9315|0.9062|0.9524|0.9344
F20D12.4.1	1646	0.9231
F20D12.4.3	426|1501|1558|1846|1849	0.9423|0.9107|0.9306|0.9655|0.9429
F20D6.4a	663	0.9231
F20D6.4b	1040	0.913
F20D6.4d	694|765|837	0.9194|0.9259|0.9318
F20G2.2	80|344|380|562	0.9194|0.9032|0.9091|0.913
F20G4.3	2420|3824|4608|4902|4962|5181|6040|6106|6169|6258|6279	0.9091|0.9143|0.9|0.9118|0.913|0.9268|0.931|0.9|0.9167|0.9|0.9375
F20H11.1	893|894|1273	0.9512|0.9556|0.9355
F20H11.3	389|407|428|467|944|958|1010|1150|1152|1156|1157	0.9725|0.95|0.9003|0.9565|0.963|0.9949|0.9252|0.9792|0.9621|0.9451|0.9331
F20H11.5	131|231|233|456|469|653|838|922|1127|1271|1273	0.928|0.9565|0.9649|0.972|0.9615|0.9388|0.9542|0.9216|0.9138|0.9333|0.913
F21C10.10.1	721|913	0.9667|0.9412
F21C10.10.2	461	0.913
F21C10.9.1	326|759|787|1057	0.918|0.9|0.9398|0.9778
F21C10.9.2	326|787	0.9048|0.9048
F21C3.4a	721	0.913
F21C3.5	430	0.9231
F21D5.1	132|335|417|875|975|1131|1138|1330|1879	0.95|0.9024|0.9024|0.931|0.9259|0.9355|0.9487|0.9231|0.963
F21D5.2a.1	252|320|416|960|962	0.9524|0.9231|0.9508|0.913|0.9091
F21D5.2b	476	0.9167
F21D5.2c	476	0.9231
F21D5.5	433	0.92
F21D5.6	226|846	0.9231|0.9
F21D5.7	28|602	0.9623|0.9512
F21D5.8	359	0.9483
F21F3.6	494|698|700|704|803	0.9268|0.9|0.9643|0.9048|0.9688
F21F8.3.1	155|225|478|481|494|548|584|661|750|791|801|1176	0.9611|0.9062|0.9497|0.9733|0.9228|0.9375|0.9853|0.9661|0.9739|0.9457|0.9|0.9821
F21F8.3.2	468|471|538|574|651|740|1166	0.9531|0.9556|0.9|0.9231|0.9048|0.9506|0.9545
F21F8.7	62|121|172|588|734|802|806|892|943|944|945|982	0.9723|0.9947|0.9201|0.9557|0.9265|0.9575|0.9861|0.9899|0.9333|0.9718|0.9573|0.9706
F21H12.1	1370	0.9091
F21H12.6	750|753|759|1395|1491|1683|1980|2340|2786|2816|2975|3105|3201|3252|3503|3560|3865|4095|4207|4273|4275|4276|4336	0.9556|0.9062|0.9091|0.9211|0.9444|0.9167|0.9524|0.9429|0.9512|0.9655|0.9701|0.963|0.9286|0.9048|0.9524|0.9412|0.9412|0.9737|0.9459|0.9348|0.9753|0.95|0.9474
F21H7.5	724	0.9211
F22A3.6a	77|79|82|465|468|527	0.9744|0.9778|0.9265|0.9852|0.9932|0.9157
F22A3.6c.1	37|39|424|427	0.9675|0.9|0.9831|0.9765
F22A3.6c.2	372	0.9
F22A3.7	101|118|416	0.9062|0.9048|0.9556
F22B3.4.1	795|938|1180|2191|2221|2240	0.9107|0.9355|0.9519|0.9087|0.949|0.9712
F22B3.4.2	2097	0.9211
F22B5.1	204	0.96
F22B5.10	695	0.9211
F22B5.2a	472	0.9552
F22B5.7	1006|1821|2399|3018	0.9231|0.913|0.931|0.9524
F22B5.9	248|588|1101|1176|1177|1227|1358|1524|1612|1795	0.9333|0.907|0.9604|0.9487|0.9167|0.9474|0.9268|0.9167|0.9104|0.9
F22B7.5b	534	0.9375
F22B7.6a	235	0.92
F22B7.9	487	0.9545
F22D6.2	253|500|601|604|878	0.9851|0.9153|0.9804|0.9744|0.9074
F22D6.3a	96|178|208|517|778|781|822|1004|1261|1264|1638|1720|1721	0.956|0.9518|0.9252|0.9312|0.9464|0.985|0.9136|0.9432|0.9524|0.9412|0.9577|0.9213|0.9107
F22D6.4.1	460	0.9783
F22D6.5a	188	0.9286
F22D6.6	1317	0.9286
F22E10.5a	591|760	0.9474|0.9286
F22E5.17	883	0.913
F22E5.9.1	409	0.9167
F22F4.4	69|762|813	0.9048|0.9167|0.9273
F22F7.1a	88|535|612|662|717|727|729|784|984|1135|1137|1170|1197|1200|1203	0.9365|0.9013|0.9312|0.9929|0.9143|0.9348|0.9595|0.9466|0.9815|0.9777|0.9781|0.9137|0.9815|0.9872|0.9394
F22F7.8	387	0.9
F22H10.3	238	0.9394
F22H10.6	514	0.931
F23A7.4.2	213	0.9641
F23A7.8	89|97	0.9005|0.9521
F23B12.4a.1	456|459|637|644|956|1291	0.9571|0.9286|0.9259|0.9394|0.9298|0.9661
F23B12.5.1	837|840|950|1131|1269|1335|1394|1657|1824	0.9388|0.9474|0.9512|0.9745|0.9352|0.9463|0.925|0.985|0.92
F23B12.5.2	1190|1512	0.9375|0.9444
F23B12.6.1	1112	0.9259
F23B12.7.1	950|1632|2165|2431	0.9143|0.9048|0.9091|0.9394
F23B2.11.1	54|282|1440|3231	0.9231|0.9333|0.9|0.9286
F23B2.12	3175	0.9048
F23B2.13a	18|20|21	0.9273|0.9452|0.932
F23B2.5a	345|601	0.9|0.9048
F23B2.5b	555|561	0.9048|0.9167
F23B2.6	208|213|363|555|650	0.9788|0.9003|0.972|0.949|0.9111
F23C8.4.1	223|306|657|929	0.9231|0.9118|0.9211|0.9231
F23C8.4.2	223|501|600|657|929|977	0.931|0.9259|0.9255|0.9438|0.907|0.9333
F23C8.5a.1	580|733|1010|1245|1313	0.9333|0.956|0.9625|0.9497|0.9123
F23C8.6	364|666	0.9531|0.9247
F23C8.9	188	0.9268
F23D12.11	163	0.9675
F23D12.6	326	0.92
F23F1.1a.2	72	0.9394
F23F1.5	213|473|601	0.9355|0.9375|0.9355
F23F1.8a	466|586|1062|1157|1184|1367	0.9647|0.9622|0.9362|0.9444|0.9853|0.9091
F23F1.8b	361|481|957|1052|1079	0.9753|0.9819|0.9032|0.92|0.9837
F23F1.9	120|966|1216	0.9091|0.9167|0.9231
F23F12.6.1	17|20|124|211|220|364	0.9801|0.98|0.9714|0.9231|0.9191|0.9487
F23H11.1	336|503|506|575|753|864	0.9091|0.9444|0.9623|0.942|0.9821|0.9318
F23H11.3.1	608|620|623|801|819|896|1005|1078	0.9728|0.9492|0.9385|0.9136|0.9175|0.9508|0.971|0.9151
F23H11.3.2	270|576|973	0.9091|0.96|0.9259
F23H11.5	293	0.9079
F23H11.9a	74|363|373|630	0.9535|0.9286|0.95|0.9048
F23H11.9b.1	74|182|341|363|373|643	0.9412|0.9423|0.9268|0.9091|0.9024|0.9231
F23H12.1.1	184|479	0.9211|0.913
F23H12.2	49|52|61|623	0.9333|0.9893|0.9014|0.9107
F23H12.4a	712|713|722	0.9048|0.9091|0.9
F23H12.8	243|313|322	0.9647|0.9167|0.9701
F23H12.9a	292	0.9333
F25B3.1	521|596|749|776|779|905|1203|1448|2024|2867|2872|2921|2946|2965	0.92|0.9189|0.9512|0.9111|0.9412|0.9429|0.9048|0.9167|0.9091|0.9434|0.9|0.9032|0.9459|0.92
F25B3.6	1243|1586|1837|1852|1894	0.9|0.9189|0.9385|0.957|0.9643
F25B4.1.1	373|404	0.9231|0.9062
F25B4.4	17	0.9143
F25B4.5	493|852|856|956|996|1616|1985|2093|2154|2158|2230|2303	0.9|0.9333|0.9348|0.9211|0.9041|0.9362|0.92|0.96|0.9538|0.9348|0.9231|0.9286
F25B4.7.2	142|676|757	0.9649|0.9|0.9091
F25B4.9	519|669|750|807|840	0.9447|0.9379|0.9077|0.9362|0.9298
F25B5.3b	59|193|225|1026|1235|1351	0.9492|0.9512|0.9091|0.9259|0.92|0.9286
F25B5.3c.2	502|1406	0.9|0.9048
F25B5.4a.1	467|548|695|1460|1835|2600	0.9388|0.9608|0.9815|0.9074|0.9477|0.902
F25B5.4a.2	517	0.9487
F25B5.5	1078	0.9355
F25B5.6a	387|1054|1489|2149	0.931|0.9048|0.9167|0.9286
F25B5.6c.1	69|745|1831	0.9091|0.9062|0.9355
F25B5.7a	1137	0.9167
F25D1.1a	778|882|1771|2190	0.9554|0.9437|0.9251|0.9091
F25D1.1c.2	330	0.9091
F25D1.5	283|343|497	0.9375|0.9091|0.9286
F25D7.1.1	263|474	0.975|0.954
F25D7.1.2	245	0.9444
F25D7.2.1	617|854|856	0.9429|0.9571|0.9091
F25D7.4	325|333|818|983|1025|1133|1430|1610|1613|2207|2210|2398	0.9167|0.9333|0.9368|0.9268|0.9333|0.9|0.9342|0.9355|0.9714|0.9012|0.9767|0.9432
F25E2.2b	118|229	0.9255|0.9048
F25E2.4	1277|1279|1398	0.9333|0.913|0.9091
F25E5.8a.1	1120	0.9412
F25G6.8	191|282	0.913|0.9
F25G6.9	273|734|1021|1846|1911	0.9394|0.92|0.9062|0.9048|0.9355
F25H2.10	103|568|708|723|730|867|870|873|903|906|909	0.9979|0.9501|0.9429|0.9091|0.9757|0.993|0.9994|0.999|0.9971|0.9968|0.9818
F25H2.12a	662	0.9062
F25H2.4	61	0.913
F25H2.5.1	275|276|408|410|590|629	0.9613|0.9342|0.9294|0.9583|0.9915|0.9515
F25H2.5.2	275|276|408|410|590|629	0.9579|0.9239|0.9134|0.9628|0.9912|0.9651
F25H2.5.3	232|233|365|367|547|586	0.9432|0.9014|0.9173|0.9591|0.9919|0.9441
F25H2.5.4	235|368|370|550|589	0.9434|0.928|0.9727|0.9919|0.9613
F25H2.7	1154	0.9286
F25H2.8.1	868|1002|1035|1086|1098|1187|1432	0.9259|0.9143|0.9259|0.9|0.9412|0.9583|0.9412
F25H2.9	47|152|155|178|746|748|823|826|832	0.9273|0.963|0.9765|0.9264|0.9534|0.9375|0.9018|0.9867|0.9394
F25H5.3a	19|192|195|417|456|1383|1453|1456|1464|1465|1497|1602|1805|1807|1878|1881|1893|1948	0.9167|0.9091|0.9429|0.9775|0.9221|0.9612|0.9725|0.9141|0.9322|0.9231|0.9|0.9012|0.9721|0.9655|0.9052|0.9653|0.9321|0.9884
F25H5.3c.1	2188|2255	0.9394|0.9189
F25H5.4a.1	408|483|602|855|1158|1512|1514|1637|1737|2147|2276|2418|2428|2578|2685	0.9016|0.9316|0.9416|0.9236|0.9553|0.9275|0.9893|0.9642|0.9|0.9725|0.9256|0.9896|0.9094|0.9646|0.9286
F25H5.4a.2	483|602|612|855|1158|1514|1637|1737|2147|2276|2418|2578	0.9462|0.9187|0.9111|0.9127|0.9088|0.9845|0.9525|0.913|0.9563|0.9118|0.9913|0.9823
F25H5.4a.3	483|855|1158|1256|1512|1514|1637|1649|2147|2276|2418|2578	0.95|0.9454|0.9645|0.9069|0.9258|0.9932|0.9573|0.9056|0.9664|0.9219|0.9906|0.975
F25H5.4b.1	436|555|808|1111|1467|1532|1590|1602|1690|2100|2371|2381|2531	0.9545|0.9104|0.9029|0.9254|0.9695|0.9213|0.94|0.9062|0.9385|0.9697|0.9794|0.9068|0.9661
F25H5.4b.2	1431|1554|2064|2193|2335	0.931|0.9375|0.913|0.92|0.9048
F25H5.4b.3	1434|1436|1501|1559|2069|2198|2340|2500	0.9138|0.9574|0.9231|0.9444|0.9661|0.9048|0.95|0.9355
F25H5.4b.4	524|534|777|1178|1436|2198|2334|2340|2500	0.9259|0.9062|0.9176|0.9322|0.9516|0.9101|0.9167|0.9592|0.9459
F25H5.4b.5	730|1033|1131|1389|2022|2293	0.931|0.913|0.931|0.9286|0.931|0.9231
F25H5.6.1	321	0.931
F25H5.8	174|247|263	0.9231|0.9787|0.9643
F25H8.2	614|888	0.9062|0.9524
F25H9.5a.1	884|1506|1508	0.9091|0.9565|0.9423
F25H9.5a.2	1427|1429	0.9474|0.9487
F25H9.7a	71|452	0.9167|0.9231
F26A1.1	339|414	0.9138|0.9344
F26A3.1	929	0.9
F26A3.4	231|278|383	0.9342|0.9231|0.9032
F26A3.7	26|372|654|837	0.9429|0.907|0.9333|0.9524
F26B1.2a	253|337|404|621|632|696|1362|1492	0.9423|0.9194|0.9241|0.955|0.9074|0.9077|0.9194|0.94
F26B1.2c.1	364|1435|1452|1640	0.9211|0.9|0.9268|0.9024
F26B1.3	8|497|943|958|975|976|1112|1293	0.9878|0.9867|0.9231|0.9486|0.9375|0.9478|0.9781|0.9585
F26B1.8	143|248|316|443|456|488|541	0.979|0.9784|0.9077|0.963|0.9275|0.9259|0.9759
F26D10.10	287|850|1026|1120	0.9091|0.9125|0.9741|0.9688
F26D10.3.1	56|170|381|451|502|553|872|914|1282|1284|1374|1784|1816|1817	0.9164|0.9171|0.963|0.9379|0.9907|0.9954|0.9362|0.9951|0.9362|0.9194|0.9752|0.9548|0.9742|0.9539
F26D10.3.2	56|170|381|451|502|553|872|914|1282|1284|1374|1438|1784|1816|1817	0.9003|0.907|0.9582|0.9307|0.9936|0.9965|0.9383|0.9949|0.9066|0.9195|0.9623|0.9286|0.9511|0.9629|0.9452
F26E4.1	39|1637|1638|1751|1819|1973|2065|2381	0.913|0.9432|0.9286|0.9583|0.95|0.9474|0.9167|0.9216
F26E4.11	1289|1430	0.931|0.9032
F26E4.12.1	247|248|372	0.9118|0.9302|0.9138
F26E4.4	359|413|643|775|778	0.9057|0.9231|0.9583|0.9524|0.9245
F26E4.6	108|132|135|177|178|269|271	0.9933|0.9429|0.9815|0.9012|0.9286|0.9955|0.9097
F26E4.8a	263|384|464|520|523|649|837|840|892|1161|1388	0.9326|0.9565|0.9595|0.9241|0.9368|0.9778|0.9167|0.982|0.9239|0.9424|0.9265
F26E4.8b	183|265|386|466|522|525|651|839|842|894|1077|1163|1390|1499	0.918|0.9561|0.9659|0.9604|0.9378|0.9286|0.984|0.9672|0.988|0.9528|0.902|0.9803|0.9667|0.9167
F26E4.9.1	243|292|415|476	0.9455|0.9845|0.9295|0.9722
F26E4.9.2	262|446	0.9505|0.9459
F26E4.9.3	360	0.9355
F26F12.1	70|108|265|653|815|918|946	0.9216|0.9755|0.9155|0.9249|0.9819|0.9046|0.9024
F26F12.7	741|1231|1999|3638|5127|5427	0.9355|0.92|0.9|0.9286|0.9048|0.9091
F26F4.1.1	354|754|812|1054	0.9266|0.9012|0.9091|0.9535
F26F4.10a.1	553|747|748|811|965|1067|1680|1987|2125	0.9|0.9245|0.9254|0.9|0.9697|0.9294|0.9455|0.9|0.9048
F26F4.10a.2	735|1055|2296	0.9048|0.9429|0.9
F26F4.11	118|232|233|324|335|338|490	0.9083|0.9163|0.912|0.974|0.9259|0.9474|0.9091
F26F4.12	221|518|640	0.9167|0.9167|0.9487
F26F4.4.1	2060	0.9091
F26F4.4.2	407|728|851|1116|1464	0.9062|0.9464|0.9512|0.9143|0.9565
F26F4.5.1	1418	0.9167
F26F4.6	1018	0.92
F26G1.1	336	0.9
F26G1.7	173|441	0.9622|0.9533
F26G5.9	816|915|1015|1198|1299|1302|1705|1833|2647|3098	0.9167|0.9259|0.9091|0.9231|0.9487|0.9286|0.9167|0.913|0.9459|0.9091
F26H11.2b	4347|4349	0.931|0.9286
F26H11.5.1	159	0.9565
F26H11.6	394|400|403|705|829	0.9091|0.9286|0.9149|0.9|0.9302
F26H9.1a	191|1115|1381	0.9|0.9|0.9143
F26H9.2	164|726|804|1027|1258	0.9259|0.9394|0.9333|0.9487|0.9333
F26H9.4	456	0.9111
F26H9.5	68|71|288|290|606|618|647	0.9706|0.9688|0.9286|0.9444|0.9104|0.9294|0.9796
F26H9.6	455|491|621|667|669|670|870|872|900	0.9618|0.9048|0.914|0.9367|0.9462|0.9189|0.9524|0.9231|0.9213
F27C1.1	78|224|277|303|516|518|827	0.9268|0.9014|0.9286|0.9134|0.9388|0.9|0.9426
F27C1.2a	793	0.9487
F27C1.2b	551|653|805	0.9|0.9565|0.9639
F27C1.6.1	259|288|800|1117|1388	0.9|0.9|0.9143|0.9355|0.9167
F27C1.7a.1	774	0.9062
F27C1.7a.2	202	0.931
F27C1.7a.4	155	0.9542
F27C1.7a.5	120	0.9143
F27C8.6.2	66|137|338|521|523|701|830|923|943|945|1000|1002|1105	0.9625|0.9571|0.9759|0.9241|0.9444|0.9077|0.9602|0.9118|0.96|0.9643|0.9344|0.9706|0.9703
F27D4.1	175|258|286|382|387|721|940|994|1012	0.9899|0.9839|0.9767|0.96|0.9882|0.9062|0.9432|0.9543|0.9091
F27D4.2a.2	117|322|376|877|1039|1152	0.9091|0.913|0.9429|0.9259|0.9375|0.92
F27D4.4a	198|360|368|447|528|1153	0.902|0.9237|0.9167|0.9181|0.9111|0.9231
F27D4.5	194|356|574|575|947|1080|1193|1219|1247|1291|1295	0.9444|0.9318|0.9216|0.907|0.9565|0.9035|0.9024|0.9583|0.92|0.9148|0.9173
F27D4.7	364|409	0.9348|0.92
F27D9.5.1	605|755|1371|1619|2138	0.9474|0.9661|0.9091|0.92|0.9516
F27D9.5.2	2098	0.9048
F27E5.1	464|1101|1183	0.9032|0.925|0.9474
F28A10.6	323|369|382|397|648|830|851|1033	0.9352|0.9355|0.9545|0.9661|0.9286|0.9429|0.9474|0.9545
F28A12.4.1	219|394|449|505|604|1078|1081	0.913|0.9167|0.9598|0.9118|0.9843|0.9091|0.9065
F28A12.4.2	417|473|572|775|1046	0.9225|0.9|0.973|0.9065|0.9091
F28B12.3.1	293|394|1060|1360	0.9556|0.92|0.9583|0.9516
F28B3.10	235|376|535|553	0.9194|0.9091|0.9167|0.9091
F28B3.5a	1433	0.9245
F28B3.7a	977|1005|1473|3265|3549	0.9048|0.9259|0.9231|0.931|0.9259
F28B4.3.1	2910|4027	0.9|0.92
F28C6.2	860|1856	0.9091|0.9062
F28C6.3.1	164|990|1212|1253|1256	0.9259|0.913|0.9167|0.9|0.913
F28C6.3.2	990|1212|1256	0.9149|0.9048|0.9412
F28C6.6.1	357|512|717|1000|1220|1325|1963|2093	0.9231|0.9|0.9259|0.9091|0.9412|0.9333|0.9048|0.9062
F28C6.7a	106|264|317|392	0.9344|0.9816|0.9449|0.9884
F28C6.7b	264|308	0.9524|0.94
F28C6.7c	203|264|322	0.9048|0.925|0.9231
F28C6.8a	206	0.9091
F28D1.1.1	237|504	0.9259|0.9032
F28D1.1.2	509|757	0.913|0.9394
F28D1.10.1	3512	0.9048
F28D1.7a.1	125|196|214|290|403|404	0.9684|0.9289|0.9773|0.9126|0.9407|0.939
F28D1.7a.2	110|199|275|388|389	0.9531|0.9598|0.9045|0.9148|0.9327
F28F5.3a	3394	0.92
F28F8.2	127|143|152|426|546|575|576|694|765|911|1393|1929	0.9032|0.925|0.9565|0.9|0.9111|0.9167|0.9394|0.9429|0.9167|0.9189|0.9375|0.9524
F28F8.5a	315	0.913
F28F8.5b	298	0.9048
F28F8.6.1	176	0.9394
F28F8.6.2	123|332	0.9412|0.9
F28H1.2	174|602|603	0.9545|0.9057|0.9512
F28H1.3.1	64|2316|2474|3029	0.9459|0.9524|0.95|0.9286
F28H1.3.2	393|1771|2304|2462	0.9091|0.9091|0.9355|0.92
F28H1.3.3	2177	0.9
F28H7.3	91|212|697	0.9516|0.9773|0.961
F29B9.11.1	146	0.9744
F29B9.11.2	144|362	0.9375|0.9259
F29B9.2b	785|1064|2906|2955|2957	0.913|0.913|0.9167|0.9091|0.9091
F29B9.4a	1241|1242|1324	0.9429|0.9394|0.9254
F29B9.6.1	470|1002	0.9286|0.9048
F29B9.6.2	470|1022	0.9275|0.9375
F29C12.4.1	836|1124|1962	0.913|0.9167|0.931
F29C12.4.2	1517|1854|1875|1962	0.9394|0.9259|0.9048|0.9062
F29C4.6.1	284	0.9412
F29C4.7a.1	551|1154|1702|1778	0.9091|0.9|0.9362|0.913
F29C6.1a	53|222|620|623	0.9091|0.9074|0.9464|0.913
F29D10.4	89|1033|2981|3346	0.9231|0.913|0.9048|0.9
F29D11.2	816|2399|2659|3246	0.9048|0.9259|0.9333|0.9
F29F11.1	20|636|780|1061|1128|1228|1324	0.9277|0.9163|0.9286|0.9152|0.9005|0.9697|0.9643
F29F11.3	859|967|1049	0.9333|0.9649|0.9211
F29F11.6	49|97|437|592	0.9118|0.9412|0.9268|0.9245
F29G6.3a.2	126|315|369|1486|1870|1965|1979	0.9231|0.9167|0.9189|0.977|0.9057|0.9545|0.9375
F29G9.2a.2	852|1018|1411	0.9062|0.9|0.9062
F29G9.3	21|334|536	0.934|0.9355|0.9609
F29G9.5	248|744|895|1289|1291	0.9029|0.92|0.917|0.9342|0.9417
F30A10.3.1	667|1195	0.9|0.9091
F30A10.3.2	195|393|633|690|1131|1183	0.913|0.913|0.9623|0.913|0.9444|0.925
F30A10.5b.2	1007	0.9
F30A10.6	99|194|577|1365|1449	0.9091|0.913|0.9574|0.9079|0.9551
F30A10.9	159|161	0.9286|0.96
F30F8.1	195|719|1626|1658	0.9|0.9268|0.9556|0.9
F30F8.3	39|174|176|247|605|778	0.9302|0.9531|0.9545|0.9455|0.9167|0.9074
F30F8.8.2	559|925|1120	0.9048|0.9167|0.9649
F30F8.9a	855	0.9167
F31C3.1.1	52|519|692	0.9474|0.9851|0.9275
F31C3.1.2	37|52|519|692	0.902|0.948|0.9888|0.9271
F31C3.2b	809|2404	0.9412|0.9091
F31C3.4	557|1020|1095|1242|1252	0.9661|0.9167|0.9245|0.9375|0.9219
F31C3.5	451	0.9167
F31D4.1	351|392|833	0.9487|0.925|0.9091
F31D4.2	1394|1664|1855	0.9|0.9048|0.9091
F31D4.3.1	340|818|1101|1350	0.9211|0.9853|0.9667|0.9211
F31D4.9.1	53|63|327	0.9437|0.9535|0.9444
F31D4.9.2	12|53|63|327	0.902|0.9083|0.9685|0.9298
F31E3.3	572|577|761|778|1029	0.9355|0.981|0.9675|0.9062|0.9231
F31E3.5.1	20|27|97|136|169|283|321|354|445|647|883|954|1070|1344	0.9194|0.922|0.9521|0.9143|0.9286|0.9422|0.9476|0.999|0.9725|0.9824|0.9753|0.9666|0.9809|0.9554
F31E3.5.2	9|16|86|125|158|272|310|343|434|636|872|943|1059|1333	0.9165|0.9239|0.9499|0.922|0.9152|0.9429|0.9689|0.9989|0.9727|0.9837|0.9859|0.9683|0.9894|0.9649
F31E3.5.3	9|11|16|86|125|158|272|310|343|434|636|872|943|1059|1333	0.9182|0.902|0.9245|0.9504|0.922|0.9332|0.9437|0.9583|0.997|0.975|0.9837|0.9775|0.9599|0.9833|0.9509
F31E3.6.2	141	0.9184
F31F4.15a	528|867|963	0.9143|0.9677|0.9322
F31F6.6	1579|1679|1707	0.9355|0.92|0.9032
F31F7.1a	709|827|869|1055|1168|1178|1341	0.9216|0.9624|0.9|0.9474|0.9032|0.9091|0.9048
F32A11.1.1	23|562|776|777|971|1027|1080|1237	0.9118|0.9062|0.9048|0.92|0.9412|0.907|0.9067|0.931
F32A11.2.1	1008	0.92
F32A11.3	67|167|649|652	0.9143|0.9091|0.92|0.9444
F32A5.2b.1	150|467|1685	0.9231|0.9429|0.9524
F32A5.3	429|490|642|898|949|1099|1680|1701	0.9385|0.9318|0.9437|0.9362|0.9189|0.9|0.9048|0.913
F32A5.4a.1	598|1183	0.9032|0.9459
F32A5.5a	888	0.9048
F32A5.7.1	96	0.9219
F32A5.8.1	550	0.9512
F32A7.4	275|356|1124	0.9286|0.913|0.9048
F32A7.5a	2221|2224	0.9091|0.92
F32B5.1	428	0.9091
F32B5.4	136|242|363	0.9512|0.9205|0.9231
F32B5.6a	314|386|1201	0.9118|0.9333|0.9412
F32B5.8a	151|174|263|392|954	0.9369|0.9412|0.9|0.9817|0.907
F32B6.2.1	72|354|358|359|628|970|1026|1258|1300|1342|1411|1755|1776	0.9375|0.9516|0.902|0.9579|0.9057|0.9111|0.9697|0.9149|0.9083|0.95|0.9259|0.9396|0.9074
F32B6.3.2	370	0.9286
F32B6.4	472	0.9167
F32B6.5	111|339|340|341|354|514|555|570|894|939	0.9429|0.9|0.9623|0.9712|0.9217|0.9167|0.9029|0.9017|0.9538|0.9333
F32B6.6	396	0.9333
F32B6.8b.1	218|1377|2009	0.9048|0.9474|0.9111
F32D1.10	1330|1369|1585|1728|1742|1981|1992|2075|2278	0.9091|0.9438|0.9412|0.9667|0.9559|0.9394|0.913|0.955|0.9355
F32D1.2	25|184	0.991|0.9679
[truncated: 3,687 more rows]

## Sheet: EMB_denovo
Table S9 List of putative RNA modification sites identified with long reads.
Isoform	A site	A fraction	U site	U fraction	C site	C fraction	G site	G fraction
2RSSE.1b	1618	0.9375	1478|1554|1619	0.9|0.9|0.9333	1606	0.9032	1607|1620	0.9|0.9286
AC3.2	123|208|241|298|353|454|506|584|586|599|682|683|693|755|756|764|841|972|1018|1049|1074|1092|1093|1257|1438|1546|1547|1592	0.9118|0.9512|0.9024|0.925|0.9512|0.9024|0.9524|0.9048|0.9545|0.913|0.9286|0.9565|0.9268|0.9545|0.9556|0.9302|0.9286|0.9545|0.907|0.9091|0.9302|0.9149|0.9333|0.913|0.9231|0.9565|0.925|0.9091	125|243|337|507|765|970|1050|1185|1246|1543|1545	0.9211|0.9048|0.9524|0.9231|0.9318|0.9487|0.9512|0.9302|0.9375|0.9091|0.9362	692|828|863|971|1594	0.913|0.9459|0.9|0.9024|0.9259	61|242|299|312|313|338|355|508|585|600|684|694|754|763|843|1051|1061|1062|1186|1428|1429|1544|1593	0.9062|0.907|0.9487|0.9062|0.9032|0.9|0.9189|0.9524|0.9302|0.9111|0.9302|0.9524|0.9111|0.913|0.9048|0.9524|0.9024|0.9048|0.9333|0.9111|0.9|0.9333|0.9
AC7.2a.1	234|449|460|541|610|654|755|757|871|886|1092|1093|1100|1153|1306|1317|1452|1493|1645|1673|1840|1873|1875|1969|1970|2166|2167|2168|2234	0.92|0.9032|0.9062|0.913|0.9259|0.9091|0.9444|0.9048|0.9444|0.9062|0.9032|0.9375|0.9143|0.9412|0.9259|0.9|0.9091|0.9091|0.9032|0.9444|0.9355|0.9394|0.9259|0.9062|0.9032|0.9444|0.9189|0.9412|0.9444	830|872|1091|1304|1501|1609|1642|1747|1968	0.9062|0.9394|0.9091|0.9|0.9333|0.9032|0.9118|0.9032|0.9412	217|653|738|754|826|1305|1610|2236	0.9032|0.9|0.9412|0.9143|0.9375|0.9355|0.9394|0.9444	366|367|447|448|739|756|828|873|981|1130|1611|1641|1672|1749|1874|2235	0.9|0.9062|0.9091|0.9091|0.9118|0.9429|0.9091|0.9091|0.9032|0.9|0.9333|0.9032|0.9412|0.9032|0.9355|0.9444
AH6.5	19|91|137|198|240|261|394|476|725|758|759|807|867|893|894|911|912|913|930|980|997|1029|1132|1181|1220|1249|1255|1293|1460|1461|1568|1570|1682|1683|1747|1749|1838|1893|1895	0.9412|0.9497|0.9333|0.9333|0.9178|0.9437|0.9295|0.9216|0.9182|0.9405|0.9222|0.9775|0.9371|0.9091|0.9777|0.9198|0.9568|0.9724|0.9167|0.9091|0.9672|0.9419|0.92|0.9487|0.9143|0.9251|0.9012|0.9453|0.9521|0.9167|0.9459|0.9012|0.9051|0.9071|0.9559|0.9577|0.9502|0.9091|0.9265	20|28|138|540|664|726|760|805|868|931|967|998|1089|1133|1294|1444|1744|1745|1754|1839|1854	0.9774|0.9267|0.9231|0.9154|0.9337|0.984|0.9222|0.9474|0.9617|0.9365|0.9535|0.9832|0.9709|0.9102|0.9235|0.9263|0.9433|0.9153|0.9042|0.9362|0.9421	21|90|199|260|383|384|551|869|892|1179|1313|1397|1459|1748|1751	0.9412|0.9122|0.9324|0.9636|0.9313|0.9116|0.9324|0.9451|0.9141|0.9648|0.9251|0.9375|0.933|0.9717|0.9815	27|92|139|262|665|727|806|873|884|895|996|1087|1180|1244|1250|1292|1396|1456|1750|1753|1837|1853	0.9048|0.9221|0.9106|0.9255|0.9255|0.9722|0.9623|0.9051|0.9273|0.9123|0.9209|0.9649|0.9686|0.9156|0.913|0.9648|0.9655|0.9016|0.9821|0.9362|0.9347|0.9801
AH9.2	361|454|455|505|523|703|793|851	0.9091|0.9091|0.9091|0.9|0.9048|0.9048|0.9091|0.92	393|398|411	0.9|0.9048|0.9048	32|394|506	0.9048|0.9048|0.913	31|193|721|852	0.9048|0.9048|0.9|0.9167
AH9.3	69|74|79|103|105|106|107|109|128|129|144|202|253|254|277|279|318|431|448|538|744|745|887|888	0.918|0.9333|0.9403|0.9697|0.9091|0.9571|0.9589|0.9452|0.9167|0.9559|0.9194|0.9155|0.9452|0.9333|0.9756|0.96|0.9429|0.9091|0.9481|0.9787|0.925|0.9157|0.9778|0.978	9|62|185|272	0.9286|0.9016|0.913|0.9444	130|319|539|711|886	0.973|0.9625|0.9753|0.9512|0.9684	75|104|108|131|132|135|255|273|276|278|493|540|590	0.9403|0.9692|0.9583|0.9153|0.9333|0.9403|0.9|0.9104|0.9583|0.9756|0.9333|0.9753|0.9506
B0001.1a	17|110|112|355|398|437|438|453|653|655|786|787|790|838	0.9556|0.9714|0.945|0.9048|0.9691|0.9192|0.9619|0.9053|0.9496|0.9036|0.9062|0.9101|0.9425|0.956	18|65|456|654|736|788|923	0.9247|0.9515|0.9479|0.9412|0.9175|0.9412|0.9043	111|356	0.9828|0.9273	19|166|301|357|397|399|454|457|697|837|924	0.9596|0.9082|0.9703|0.9048|0.9079|0.9175|0.9121|0.9381|0.9062|0.9167|0.9121
B0001.2	1015|1102|1239|1510|2163|2173|2281|2506|2552|2728	0.9091|0.9|0.9|0.9167|0.9|0.9231|0.9231|0.913|0.9167|0.9048	1016|1435|1547|2655|2729	0.9091|0.913|0.9167|0.92|0.9091	2553	0.9091	720|1106|1512|1943|2133|2174|2493|2554|2656|2730	0.9048|0.9|0.913|0.9167|0.92|0.913|0.913|0.913|0.9167|0.9231
B0001.3b	68|105|107|145|169|236|258|319|334|554|556|588|621|623|627|769|771|772|780|919|1062|1161|1162|1170|1260|1264|1265|1278|1439|1520|1521|1606|1667|1669|1691|1706|1754|1773|1775|1816|1817	0.9574|0.9583|0.9333|0.9333|0.9286|0.9333|0.9231|0.9048|0.9556|0.9574|0.9565|0.9412|0.96|0.9592|0.9524|0.913|0.96|0.9565|0.9535|0.9091|0.9048|0.9149|0.9524|0.9583|0.9286|0.902|0.9184|0.9545|0.913|0.9592|0.9375|0.9268|0.96|0.9565|0.9111|0.9024|0.9592|0.9091|0.9048|0.9512|0.9556	70|106|333|622|669|1144|1279|1522|1692|1704|1774|1777	0.9556|0.9362|0.9211|0.9592|0.9024|0.9318|0.9318|0.9111|0.9388|0.925|0.9|0.94	143|235|551|555|778|898|1143|1168|1216|1366|1441|1508|1531|1753|1859	0.925|0.913|0.9348|0.9556|0.9524|0.9149|0.9231|0.9592|0.9048|0.9|0.9556|0.9615|0.9|0.96|0.9143	69|142|200|260|521|552|619|620|770|773|779|1086|1169|1217|1440|1509|1510|1532|1668|1705|1721|1755|1776	0.9574|0.9545|0.9048|0.9091|0.9444|0.9545|0.907|0.9318|0.92|0.907|0.9268|0.9375|0.9615|0.9111|0.9|0.9615|0.9231|0.9216|0.96|0.92|0.9375|0.9375|0.9184
B0001.4a	79|121|230|275|297|298|299|389|443|686|715|761|763|842|843|920|922|978|1060	0.931|0.9079|0.9231|0.9011|0.9677|0.939|0.9551|0.9703|0.9012|0.9388|0.9545|0.972|0.9307|0.9375|0.9324|0.9192|0.9817|0.9032|0.9079	117|390|782|825|1108	0.9524|0.9462|0.9368|0.9495|0.902	781|921	0.9565|0.9626	43|58|59|118|119|231|277|388|391|762|923	0.9176|0.9333|0.9101|0.9674|0.956|0.9091|0.9222|0.9167|0.9551|0.9519|0.9205
B0001.5	156|181|273|368|402|435|762|833|1057|1178|1193|1208|1664|1665	0.9394|0.9355|0.9286|0.9286|0.9394|0.9032|0.9189|0.9474|0.925|0.9167|0.9118|0.9535|0.9512|0.95	8|69|453|456|834|1191|1385|1386|1439|1699|1834	0.9333|0.9091|0.9394|0.9394|0.9032|0.9429|0.9091|0.9118|0.9143|0.9|0.9	86|279|524|760|1056|1078|1206|1663	0.9167|0.931|0.9412|0.9167|0.9143|0.9444|0.95|0.9167	9|17|68|87|88|280|370|454|761|854|1058|1207|1429|1438	0.9333|0.9032|0.9091|0.9429|0.9412|0.9189|0.9062|0.9429|0.9487|0.9143|0.9444|0.95|0.95|0.9394
B0001.6.1	96|98|111|191|194|473|475|515|517|566|613|657|707|708|761|762|798|800|884|886|973|974|1044|1045|1047|1122|1309|1372|1376|1437|1439|1469|1470|1471|1490|1524|1634|1647|1698|1774|1816|1913|1921|1940|1941|1963|1967|1968|1981|1983|1985|1987|2024|2047|2072|2117|2190|2192|2221|2222|2319|2321	0.9508|0.9273|0.9153|0.9745|0.9|0.9098|0.9197|0.987|0.9154|0.9521|0.9306|0.943|0.9591|0.9885|0.9193|0.9697|0.9763|0.9651|0.947|0.9077|0.9104|0.9467|0.9018|0.9659|0.9236|0.925|0.9325|0.9045|0.9264|0.9588|0.9133|0.9136|0.9118|0.9264|0.9102|0.9029|0.9152|0.9064|0.9205|0.9638|0.9306|0.9532|0.9368|0.913|0.9459|0.9392|0.9461|0.9226|0.9467|0.9172|0.9717|0.9713|0.9793|0.9471|0.9198|0.9161|0.9259|0.9278|0…	109|192|222|383|658|763|885|1238|1371|1488|1632|1818|1922	0.9194|0.9015|0.9254|0.9554|0.9301|0.9767|0.9481|0.9673|0.9767|0.9516|0.9785|0.9079|0.9394	163|236|455|507|894|1325|1650|1697|2023|2073	0.934|0.9444|0.9313|0.9827|0.9145|0.9021|0.9849|0.9153|0.9628|0.9253	97|110|193|223|235|238|311|456|474|508|509|516|612|709|799|975|1029|1104|1105|1106|1207|1208|1308|1326|1377|1436|1438|1489|1633|1651|1652|1720|1751|1915|1923|1942|1961|1986|2025|2048|2116|2191|2220	0.9444|0.9167|0.9571|0.9412|0.9342|0.9478|0.932|0.9367|0.9185|0.9884|0.9885|0.9583|0.9315|0.9036|0.9766|0.9034|0.9023|0.9074|0.9444|0.9114|0.904|0.9306|0.9408|0.9007|0.9125|0.9421|0.9637|0.9408|0.9634|0.9899|0.9896|0.9059|0.9112|0.9408|0.9118|0.9278|0.9365|0.9758|0.9622|0.9641|0.9342|0.9436|0.9257
B0001.6.2	21|48|332|372|514|564|565|619|655|657|831|904|1067|1166|1233|1294|1488|1491|1630|1683|1778|1797|1798|1824|1825|1838|1842|1844|1881|1904|2047|2049|2078|2176|2178	0.9167|0.9268|0.9091|0.9535|0.913|0.9583|0.9216|0.9091|0.9574|0.9348|0.9024|0.9268|0.95|0.9167|0.9574|0.9344|0.9|0.9592|0.9118|0.9016|0.95|0.9091|0.9577|0.9365|0.9167|0.9286|0.9595|0.9722|0.9571|0.9714|0.9385|0.9189|0.9265|0.9394|0.9355	240|620|1095|1228|1489|2119	0.9556|0.9149|0.9149|0.9583|0.9508|0.9362	20|364|1164|1507|1879|1880	0.9231|0.9574|0.925|0.9677|0.9143|0.9726	95|331|365|366|373|469|656|961|962|1165|1293|1295|1490|1508|1509|1684|1780|1799|1843|1882|1905|2048|2120	0.9|0.907|0.9574|0.9574|0.9048|0.9302|0.9574|0.9245|0.94|0.9592|0.9333|0.95|0.9667|0.9524|0.9516|0.9|0.9167|0.9545|0.942|0.9565|0.971|0.9178|0.9091
B0001.7b	15|16|76|111|204|206|265|403|622|638|885|887|953|955|1175|1177|1352|1513|1557|2004|2077|2182	0.9|0.9167|0.9|0.9167|0.92|0.913|0.92|0.9091|0.9259|0.9048|0.9286|0.9286|0.9286|0.9048|0.9167|0.913|0.92|0.9091|0.9091|0.9167|0.92|0.92	203|266|341|884|935|1558|1899	0.92|0.92|0.9|0.9091|0.92|0.9091|0.9048	14|404|1510|2076|2192|2201	0.9048|0.92|0.9259|0.913|0.9231|0.9	112|205|267|342|344|405|883|886|936|952|1176|1351|1511|1512|1563|1564|1582|1980|1981|2181|2193|2206	0.92|0.92|0.92|0.913|0.913|0.92|0.9048|0.9286|0.9259|0.9167|0.9091|0.92|0.9167|0.9231|0.9231|0.9231|0.9|0.9167|0.913|0.9167|0.9231|0.9048
B0001.8a	83|151|171|180|195|215|261|366|421|447|449|486|510|512|620|664|717|725|1044|1046|1108|1109|1139|1149|1151|1159|1241|1258|1275|1570|1572|1593|1611	0.9565|0.9348|0.9583|0.9189|0.9048|0.9167|0.9348|0.9348|0.9348|0.9362|0.9167|0.9111|0.9048|0.9362|0.9|0.9231|0.9149|0.9623|0.9375|0.9388|0.9375|0.963|0.907|0.9565|0.9231|0.9592|0.9302|0.94|0.9184|0.9048|0.9333|0.9333|0.9268	80|367|422|727|920|1093|1276|1584|1586	0.9375|0.9362|0.9545|0.9388|0.9333|0.9545|0.94|0.9574|0.9348	82|393|487|511|685|715|1158|1242|1257	0.9524|0.9149|0.9388|0.9348|0.9091|0.9362|0.9615|0.9184|0.913	53|79|181|368|371|392|448|488|684|716|726|840|918|1243|1277|1328|1482|1571|1585|1594	0.9048|0.9592|0.9302|0.9362|0.9512|0.9318|0.9388|0.9565|0.9231|0.9375|0.9615|0.9|0.902|0.9574|0.96|0.9149|0.9348|0.9091|0.9388|0.907
B0019.2	64|154|256|488|510|534|629|631|827|883|886|1065|1132|1378|1405|1446|1480|1514|1533|1553|1554|1755|1756|1762|1791|1822|1825|1852|1857|1914|2032|2080|2082|2095|2158|2160|2203|2205	0.9|0.913|0.9167|0.913|0.931|0.9259|0.9333|0.9286|0.9259|0.9333|0.9259|0.9091|0.9|0.9062|0.9062|0.92|0.9|0.9231|0.9412|0.9091|0.9143|0.9167|0.9394|0.9355|0.9286|0.9167|0.9189|0.9|0.9|0.95|0.9487|0.9487|0.9512|0.9167|0.9444|0.9|0.9143|0.9118	83|179|257|821|1406|1759|1784|1823|1826|2033|2045|2081|2096|2206	0.913|0.9|0.9091|0.9231|0.931|0.931|0.9|0.9167|0.9355|0.9143|0.9412|0.95|0.9167|0.9259	884|1377|1487|1913|2170	0.9355|0.9062|0.931|0.9189|0.9091	63|84|153|155|490|508|509|630|822|885|1083|1407|1448|1459|1488|1555|1754|1757|1761|1824|1827|1856|1915|2046|2094|2326	0.913|0.92|0.913|0.9167|0.913|0.9259|0.931|0.9231|0.9231|0.9355|0.931|0.9231|0.9|0.9062|0.9375|0.9062|0.9167|0.9|0.9375|0.925|0.9286|0.9487|0.9167|0.9032|0.95|0.9333
B0024.10	27|64|70|89|90|219|320|353|400|722|773|774|790|791|797|812|1019|1020|1035|1059|1148|1176|1380|1405|1456|1457|1545|1562|1613|1817	0.9032|0.9412|0.9394|0.9412|0.9394|0.92|0.9444|0.9286|0.9118|0.9189|0.9302|0.9268|0.9024|0.9048|0.9118|0.9545|0.907|0.9535|0.9286|0.9231|0.9048|0.9189|0.9048|0.9|0.9189|0.9167|0.9211|0.9556|0.9302|0.9091	71|116|767|792|1403|1614	0.9|0.9167|0.9302|0.9286|0.925|0.9302	253|721|772|1060|1544	0.9|0.9|0.9512|0.9429|0.9545	88|99|352|634|766|811|889|1018|1021|1036|1404|1455|1542|1543|1615	0.9143|0.9394|0.9333|0.9474|0.9429|0.9535|0.9167|0.925|0.9|0.9048|0.9286|0.9167|0.9211|0.9268|0.9
B0024.11	153|155|267|312|406|434|437|438|439|603|677|733|795|844|884|886|888|980|1016|1048|1049|1332|1401|1597|1652|1682|1694|1731|1734|1738|1739	0.9153|0.9655|0.9231|0.9455|0.9464|0.9655|0.9464|0.9434|0.9608|0.9655|0.9524|0.9483|0.9038|0.9531|0.9365|0.95|0.9032|0.9455|0.9365|0.9206|0.9508|0.9|0.9038|0.9464|0.9483|0.9057|0.931|0.963|0.9322|0.9|0.9245	13|144|435|854|1014|1218|1412|1413|1735	0.9074|0.9423|0.9683|0.9138|0.9149|0.931|0.9167|0.9107|0.9216	842|1015|1608	0.9298|0.9167|0.9	145|154|268|405|436|706|707|731|794|843|885|1050|1219|1477|1598|1651|1733	0.9412|0.9492|0.9273|0.9259|0.9683|0.9123|0.9|0.9655|0.9057|0.9492|0.9474|0.9344|0.9355|0.9|0.9138|0.9524|0.9492
B0024.12	24|178|188|247|394|474|614	0.9245|0.9672|0.9138|0.9355|0.9394|0.9038|0.9556	189|249	0.9636|0.9194	90|475	0.902|0.9655	177|190|248|392|393|476|591	0.95|0.9298|0.918|0.9062|0.9385|0.9531|0.9038
B0024.13	4|11|13|23|24|165|351|481|569|583|635|663|664|898|933	0.9394|0.9211|0.9459|0.9459|0.9459|0.9286|0.9167|0.9487|0.9355|0.9091|0.9062|0.9524|0.9545|0.9024|0.9189	5|7|8|12|250|252|570	0.9394|0.9459|0.9189|0.9459|0.9429|0.9474|0.9412	584|634	0.9394|0.9032	6|14|22|25|251|410|479|480|571|662	0.9429|0.9429|0.9091|0.9143|0.9459|0.9118|0.9512|0.9512|0.9394|0.9268
B0024.9a.1	31|35|198|269|270|285|292|414|549	0.95|0.9189|0.9556|0.9286|0.9024|0.9167|0.9048|0.9524|0.9355	32|547	0.9318|0.9333	49|197|243	0.9091|0.9143|0.913	33|36|166|199|415|427	0.9231|0.9211|0.9231|0.9091|0.9333|0.9231
B0024.9b.1	31|198|245|269|270|285|292|414|549	0.9231|0.9245|0.9057|0.9655|0.9643|0.9574|0.9388|0.9259|0.9189	32|156|294|416	0.9388|0.9535|0.9038|0.9	197|243|244|423	0.913|0.9508|0.9643|0.9	33|199|415|535	0.94|0.9091|0.931|0.9032
B0025.1a	1234|1458|1539|1854|2419|2554	0.9048|0.9|0.9|0.9|0.9|0.9	1855|2555	0.9|0.9	1236|1687	0.9|0.9	1235|1659|1853|1856|2553	0.9048|0.9048|0.9|0.9|0.9
B0025.1c.1	352|586|587|620|742|1070|1275|1304|1316|1355|1482|1483|1484|1535|1537|1539|1612|1681|1766|1852|1951|1974|2182|2353|2419|2554|2556|2703	0.913|0.913|0.9167|0.9048|0.9|0.913|0.9091|0.9|0.913|0.9167|0.9333|0.9231|0.9286|0.9259|0.9231|0.9|0.9231|0.9231|0.92|0.9091|0.9286|0.9259|0.9231|0.931|0.9|0.9394|0.9394|0.9048	201|203|1223|1232|1855|2022|2407|2555	0.9091|0.9091|0.9048|0.9167|0.9333|0.9091|0.92|0.9394	1354|1687|1959|2684	0.913|0.9286|0.9|0.9355	202|351|585|603|744|1317|1390|1536|1658|1659|1713|1851|1856|1953|2067|2068|2141|2178|2351|2352|2408|2523|2553|2604|2685	0.913|0.913|0.9091|0.9091|0.9|0.9048|0.9048|0.9048|0.9167|0.9259|0.9259|0.9091|0.9333|0.9259|0.9259|0.9286|0.9032|0.9231|0.9032|0.9333|0.9333|0.9375|0.9286|0.9333|0.9355
B0025.2.1	43|46|49|76|128|129|157|178|180|182|194|245|295|340|448|568|569|682|766|781|820|890|892|907|909|917|970|1040|1042|1158|1175|1207|1210|1275|1396|1426|1441	0.9301|0.9726|0.9542|0.9735|0.9774|0.9621|0.9615|0.9328|0.9297|0.936|0.9098|0.9263|0.913|0.9257|0.9124|0.932|0.9388|0.9671|0.9752|0.9883|0.9412|0.95|0.949|0.9877|0.929|0.9113|0.9459|0.9716|0.9391|0.9524|0.9008|0.9649|0.9627|0.9315|0.9276|0.9111|0.9461	44|47|77|158|193|320|767|782|893|908|968|1208|1276|1378|1394|1451	0.95|0.973|0.9302|0.9673|0.9375|0.9219|0.9671|0.9658|0.9565|0.9024|0.9304|0.9824|0.9265|0.9137|0.9172|0.9023	127|681|840|889|969|1331|1395|1459	0.963|0.9375|0.9548|0.9137|0.9306|0.9044|0.9448|0.9133	45|48|78|99|159|177|216|321|338|339|341|447|765|768|783|828|841|891|1041|1209|1212|1280|1325|1332|1412|1443	0.9333|0.9796|0.9225|0.9259|0.9808|0.9|0.9562|0.9552|0.9191|0.9329|0.953|0.9552|0.9375|0.9797|0.9538|0.9346|0.9814|0.9551|0.9595|0.9824|0.9735|0.913|0.931|0.9097|0.9114|0.956
B0025.2.2	36|39|42|69|121|150|173|175|238|288|333|638|675|759|774|813|883|885|887|900|902|910|1033|1153|1200|1203|1419|1434	0.9231|0.9259|0.92|0.931|0.92|0.9286|0.9286|0.92|0.913|0.9118|0.9062|0.9231|0.9118|0.925|0.95|0.9444|0.9167|0.9211|0.9032|0.9474|0.9444|0.9259|0.9|0.9143|0.913|0.9348|0.9091|0.9318	37|40|70|151|186|760|886|961|1201|1444	0.9231|0.9259|0.92|0.9286|0.9167|0.9167|0.9189|0.9333|0.9348|0.9189	10|120|674|833|882|962	0.913|0.9091|0.9062|0.925|0.9118|0.9394	38|41|71|152|170|209|332|334|761|834|884|1034|1202|1205|1436	0.9231|0.92|0.9|0.9333|0.9167|0.9259|0.9032|0.9412|0.9474|0.9512|0.9143|0.9394|0.9362|0.9286|0.9111
B0025.4	4|5|12|13|17|18|90|92|165|171|186|187|251|270|271|272|357|359|392|453|503|504|507|568	0.9286|0.9028|0.9231|0.9146|0.9623|0.9118|0.9748|0.9126|0.9832|0.9504|0.9832|0.9835|0.9327|0.9268|0.9573|0.9593|0.9606|0.9661|0.9135|0.96|0.902|0.9636|0.9474|0.9348	89|164|172|229|252|358|451|502|508|567|569|574	0.963|0.9697|0.9492|0.9394|0.96|0.9844|0.9569|0.9072|0.9381|0.9519|0.9222|0.9032	11|61|185	0.9221|0.9159|0.9804	16|62|63|91|139|173|228|253|356|388|394|452	0.901|0.9231|0.9211|0.9833|0.9118|0.906|0.9714|0.9223|0.928|0.9412|0.93|0.9524
B0034.3a	5|6|16|114|170|225|293|326|470|539|581|672|715|749|769|1037|1061|1067|1177|1208|1338|1391|1457|1655|1667|1675|1692|1791|1836|1838|1846|1847|1849|1853|1936|2027|2044|2045|2062|2273|2323|2379|2565|2697|2705|2723|2745|2750|2759|2801|2858|2859|2861|2912|3030|3093|3303|3304|3305|3306|3307|3308|3309|3318	0.9231|0.9286|0.9429|0.9077|0.9667|0.9077|0.942|0.9394|0.9324|0.9118|0.9559|0.9138|0.9048|0.9615|0.9125|0.9|0.9398|0.939|0.9535|0.9342|0.9079|0.9405|0.9467|0.92|0.9121|0.9551|0.9014|0.956|0.9176|0.9457|0.9143|0.9744|0.9785|0.9|0.9211|0.978|0.9091|0.9091|0.9545|0.9551|0.9583|0.9011|0.9494|0.9302|0.9053|0.9375|0.9072|0.9697|0.9|0.9588|0.9351|0.9765|0.9423|0.94|0.9574|0.9468|0.9254|0.9688|0.9703|0.9…	287|288|320|321|327|416|422|434|527|673|750|770|809|1063|1064|1095|1179|1206|1251|1389|1392|1440|1458|1497|1661|1664|1665|1839|1850|2028|2063|2259|2275|2324|2630|2735|2751|2760|2802|2862|2913|2925|2930|2931|2937|2988|3028|3135|3191|3193	0.9242|0.9206|0.9216|0.9375|0.9722|0.9296|0.9|0.9516|0.9028|0.9524|0.9275|0.9146|0.9412|0.954|0.9697|0.9398|0.9041|0.9155|0.9167|0.9012|0.9178|0.9634|0.9118|0.9186|0.9494|0.9048|0.9667|0.9524|0.9787|0.9551|0.925|0.9419|0.9101|0.908|0.9278|0.9222|0.9355|0.9213|0.9294|0.9619|0.9059|0.9231|0.9811|0.9259|0.9519|0.9062|0.9271|0.9703|0.9239|0.9022	15|69|471|472|834|1073|1522|1660|1790|1963|2160|2321|2452|2497|2566|2643|2683|2698|2724|2949	0.9153|0.9577|0.9583|0.9437|0.9559|0.913|0.9674|0.963|0.9146|0.9014|0.9348|0.9326|0.9101|0.9556|0.9114|0.9205|0.9011|0.9451|0.9103|0.9462	164|289|294|328|415|423|426|496|582|751|808|812|835|1012|1062|1066|1096|1178|1210|1250|1390|1411|1456|1498|1523|1524|1666|1693|1792|1822|1840|1851|1854|2029|2064|2161|2162|2206|2260|2274|2322|2364|2483|2684|2761|2803|2857|2863|2881|2914|2929|2935|2936|2950|3029|3092|3136|3192	0.9516|0.9296|0.9595|0.961|0.9032|0.9014|0.9583|0.9014|0.9324|0.96|0.9565|0.9155|0.9589|0.9032|0.977|0.9067|0.9512|0.9221|0.9403|0.9512|0.9259|0.92|0.9221|0.9383|0.9583|0.9438|0.9398|0.9118|0.962|0.9028|0.9079|0.9787|0.9254|0.9444|0.9103|0.9551|0.9405|0.9125|0.9231|0.9326|0.9326|0.9186|0.9167|0.9022|0.9474|0.9195|0.9176|0.96|0.9717|0.9457|0.981|0.9314|0.9533|0.9535|0.9789|0.9341|0.9596|0.9271
B0035.11	39|48|87|89|146|152|281|284|287|295|339|341|364|404|413|416|417|419|422|423|489|491|548|569|575|578|591|596|599|662|688|755|756|875|892|922|950|953|962|964|965|1029|1037|1039|1059|1094|1097|1223|1262|1264|1273|1277|1409|1413|1414	0.9655|0.9099|0.9839|0.9478|0.9011|0.9159|0.9273|0.9375|0.9065|0.9381|0.984|0.9735|0.9504|0.902|0.9262|0.9223|0.9576|0.935|0.9764|0.9386|0.9549|0.95|0.9297|0.9421|0.9138|0.9402|0.938|0.9624|0.9688|0.9|0.9145|0.9692|0.9516|0.9565|0.9739|0.969|0.9487|0.9068|0.9111|0.9538|0.9237|0.9219|0.9091|0.9099|0.9389|0.9867|0.9606|0.9559|0.9524|0.9197|0.976|0.9462|0.9247|0.9592|0.9419	63|150|261|285|414|420|576|579|592|597|600|663|690|873|966|1009|1092|1095|1098|1224|1275|1412	0.9479|0.9569|0.9608|0.9655|0.9381|0.9322|0.92|0.918|0.9635|0.9556|0.9545|0.9217|0.9339|0.9291|0.9781|0.9273|0.947|0.9412|0.9369|0.9407|0.9275|0.9655	38|62|64|85|86|282|488|507|570|714|921|951|961|994|1036|1261|1272	0.9643|0.9195|0.91|0.916|0.9339|0.9469|0.9179|0.9068|0.902|0.9274|0.9225|0.9339|0.9281|0.9466|0.9106|0.9388|0.9159	40|88|151|260|262|283|286|296|340|365|415|421|487|490|547|571|577|580|598|601|664|689|715|874|952|995|1041|1093|1096|1099|1186|1225|1263|1274|1279|1309|1408	0.9429|0.9558|0.9661|0.9402|0.94|0.9231|0.9431|0.9224|0.9756|0.9068|0.963|0.9621|0.9365|0.9435|0.9237|0.9364|0.9389|0.9141|0.9474|0.9692|0.9153|0.938|0.9256|0.9648|0.9453|0.9048|0.9213|0.9635|0.9353|0.9417|0.9023|0.9375|0.9225|0.9767|0.9091|0.9231|0.9506
B0035.12.1	1829|2026|2067|2437|2438|2450|2545|2713|2715|2727|2872	0.9|0.9|0.9091|0.9|0.9091|0.9048|0.9|0.913|0.913|0.9091|0.9091	2065|2224|2686|2728	0.9|0.9|0.9048|0.9	2676	0.9	1830|2066|2069|2070|2217|2677|2685|2714|2729	0.9|0.9048|0.9048|0.9091|0.9048|0.9|0.9|0.913|0.9
B0035.14a.1	79|144|146|183|185|191|193|196|283|305|312|314|315|522|523|677|709|812|853|927|1046|1078|1111|1158|1165|1183|1241|1552|1554|1631|1680	0.9661|0.9362|0.9167|0.9038|0.9184|0.9259|0.9649|0.9483|0.9677|0.9048|0.9355|0.9444|0.9|0.9074|0.9259|0.9259|0.9123|0.9355|0.9074|0.9375|0.9231|0.9649|0.9268|0.931|0.9038|0.9516|0.9688|0.931|0.9464|0.9455|0.9231	80|194|284|311|683|710|813|1159|1184|1242|1345|1539|1632	0.9455|0.9286|0.9667|0.9667|0.9149|0.9123|0.9194|0.931|0.9057|0.9038|0.9434|0.9388|0.9661	310|586|678|852	0.9091|0.9286|0.9556|0.9245	195|282|285|313|679|684|685|711|723|777|778|811|929|1080|1160|1185|1240|1294|1536|1553|1633	0.9667|0.9231|0.9667|0.9661|0.9057|0.9444|0.9231|0.9038|0.94|0.9464|0.9649|0.9344|0.9038|0.9184|0.9333|0.9245|0.9677|0.9123|0.9434|0.9483|0.9483
B0035.14a.2	284|286|681|784|825|826|1073|1155|1213|1653	0.9048|0.9048|0.92|0.9231|0.9231|0.913|0.9091|0.9333|0.9333|0.9048	253|283|785|1604	0.9|0.9048|0.9167|0.9355	558	0.9048	167|254|285|651|657|683|750|1046|1212|1605	0.9|0.9|0.9048|0.9|0.9|0.913|0.92|0.913|0.9|0.9333
B0035.15	141|156|157|195|196|197|206|212|278|324|441|635|637|742|760|798|841|853|855|960|961	0.9524|0.9318|0.9333|0.96|0.96|0.9592|0.925|0.9|0.907|0.95|0.9024|0.9388|0.9623|0.9184|0.9636|0.9375|0.9615|0.9615|0.9623|0.9245|0.9216	142|205|499|638|743|854	0.9535|0.9333|0.9348|0.9286|0.9412|0.9615	194|310|761|821|842	0.9565|0.9302|0.9623|0.9268|0.9608	143|277|279|500|526|744|762|822|843|846|862|962|1005	0.9211|0.9565|0.9189|0.9333|0.9091|0.92|0.9455|0.9024|0.9608|0.925|0.9545|0.9388|0.9118
B0035.18	36|247	0.92|0.9024	37|173	0.9583|0.9024	102	0.902	103	0.9111
B0035.1a	13|15|172|271|341|680	0.9286|0.92|0.9048|0.9167|0.9|0.9062	342	0.9	679	0.9091	14|36|196|681|682|813	0.92|0.9091|0.9333|0.9394|0.931|0.9355
B0035.1b	13|15|35|37|93|107|117|118|119|164|341|520|669|680|745|814|899|981|1162|1179|1180|1188|1189|1190|1191	0.9885|0.9808|0.9253|0.9651|0.9648|0.9544|0.9745|0.978|0.9117|0.9095|0.9077|0.9428|0.9211|0.9419|0.9173|0.9271|0.9041|0.9424|0.9363|0.9587|0.9289|0.9067|0.9146|0.9056|0.9034	94|166|342|474|574|683|736|902|904|982	0.9211|0.9067|0.9028|0.9144|0.9258|0.9331|0.9161|0.9713|0.9437|0.9126	91|313|679|900|903	0.9405|0.9327|0.9427|0.9586|0.9599	14|92|95|100|106|165|196|343|475|519|573|668|681|682|788|813|823|824|901|983|1178	0.9802|0.9533|0.9545|0.903|0.958|0.9677|0.9366|0.9234|0.9112|0.9322|0.9088|0.9348|0.985|0.9422|0.9055|0.9175|0.9567|0.9075|0.9783|0.922|0.9286
B0035.2	120|158|159|291|385|528|530|591|594|740|771|794|796|834|843|855|905|959|960|1008	0.9551|0.9091|0.9125|0.9114|0.9024|0.9677|0.9136|0.9125|0.908|0.9625|0.9059|0.9619|0.9528|0.9417|0.9479|0.9167|0.9717|0.972|0.963|0.9806	255|286|289|529|592|793|844|1005|1009|1138|1140	0.9405|0.9271|0.9663|0.9432|0.9351|0.9355|0.9579|0.9529|0.9468|0.9468|0.9082	462|958|1006	0.9655|0.9712|0.9205	119|122|157|226|287|290|593|795|835|845|857|903|904|954|1007|1010|1139	0.9186|0.9054|0.9294|0.9189|0.9362|0.9667|0.9036|0.9623|0.902|0.9293|0.9255|0.9417|0.9811|0.9011|0.9111|0.9691|0.9495
B0035.3	158|341|413|481|546|655|748|749|750	0.9385|0.913|0.974|0.9565|0.9595|0.9494|0.9605|0.9571|0.9103	299|395|451|482|547|653|656|789|808	0.9434|0.9206|0.9167|0.9524|0.9452|0.9048|0.9221|0.9296|0.9403	157|298|342|377|602	0.9394|0.9362|0.9265|0.9048|0.9107	156|200|267|343|378|396|412|483|548|603|654|807|835	0.9552|0.9194|0.931|0.9577|0.9077|0.9531|0.9028|0.9492|0.9508|0.9138|0.9615|0.9231|0.9062
B0035.4a.1	84|95|167|168|193|194|210|211|224|227|362|422	0.92|0.9345|0.9355|0.9474|0.9373|0.9478|0.9564|0.9806|0.9613|0.9936|0.9667|0.9677	93|212|225|228|398|438	0.9722|0.9742|0.9464|0.9866|0.9491|0.9247	92|145|437	0.9477|0.9|0.9768	94|166|226|229|360|364|396|397|436|497	0.9756|0.9636|0.9714|0.977|0.9176|0.9721|0.9489|0.9658|0.9458|0.9167
B0035.4a.2	30|102|128|129|146|159|162|297	0.9032|0.92|0.9091|0.9167|0.9268|0.9167|0.95|0.925	28|147|160|163|373	0.9118|0.9268|0.9459|0.9487|0.9118	27|80|372	0.9333|0.9|0.9394	29|101|161|164|299|332|429	0.9118|0.9062|0.9487|0.9487|0.9444|0.9|0.9048
B0035.5	122|215|341|385|394|395|396|398|400|452|596|772|793|802|813|880|908|925|994|1117|1119|1145|1223|1239|1305|1307|1330|1354|1355|1427|1449|1450|1452|1454|1512|1515|1517|1519|1580|1582|1721	0.9333|0.9412|0.9|0.9184|0.9464|0.9444|0.9388|0.9111|0.9111|0.9211|0.9574|0.9184|0.9434|0.9388|0.9483|0.9483|0.9286|0.902|0.9531|0.9516|0.931|0.9483|0.902|0.9344|0.9697|0.95|0.9333|0.9206|0.9375|0.9231|0.9074|0.971|0.9571|0.9057|0.9531|0.9516|0.9655|0.9245|0.9123|0.9206|0.9074	25|151|179|331|353|386|545|794|926|995|1240|1270|1399|1513|1654|1656|1664	0.9574|0.9048|0.9024|0.925|0.9545|0.92|0.9149|0.9231|0.9412|0.95|0.9273|0.9038|0.971|0.9667|0.9531|0.9091|0.9531	333|352|801|949|1030|1398|1638	0.9348|0.9487|0.9388|0.9107|0.9153|0.9524|0.9	120|121|214|306|387|546|656|795|812|864|879|927|963|996|1031|1099|1115|1118|1146|1241|1272|1306|1353|1397|1451|1514|1553|1554|1581|1617|1637|1655|1665|1720	0.9524|0.9375|0.92|0.907|0.9434|0.9111|0.9091|0.9184|0.9153|0.9091|0.9333|0.9259|0.9302|0.918|0.931|0.9057|0.9474|0.9649|0.9216|0.9|0.9138|0.9333|0.918|0.9688|0.971|0.971|0.9153|0.9153|0.9672|0.9123|0.9032|0.9254|0.9167|0.9057
B0035.6	41|86|110|151|154|161|203|237|425|582|676|764|778|855|862|898|899|905|1006|1073|1191|1194|1203|1238|1295|1388|1390|1431|1467|1520|1521|1678|1679|1839|2190|2212|2213|2276|2306|2439	0.9412|0.9|0.9455|0.9286|0.9057|0.9623|0.9423|0.9184|0.9688|0.9074|0.902|0.9655|0.9667|0.9667|0.9661|0.9231|0.9394|0.9062|0.9423|0.9516|0.9074|0.9552|0.9057|0.9403|0.9344|0.9423|0.9538|0.9577|0.931|0.9104|0.9385|0.9375|0.9194|0.9385|0.9242|0.9565|0.9322|0.9143|0.973|0.9091	39|74|245|426|452|779|842|851|900|1074|1391|1430|1497|1518|1680|1977|2129|2211|2304|2307|2449	0.94|0.918|0.9107|0.9672|0.9|0.9492|0.9091|0.918|0.9375|0.9|0.9057|0.9706|0.9483|0.9333|0.942|0.9429|0.9344|0.9706|0.9138|0.9583|0.9286	150|235|763|1082|1236|1296|1466|1667|1981|1990|2286|2473	0.9444|0.9268|0.9355|0.9516|0.9688|0.9355|0.9057|0.9062|0.9306|0.9118|0.9|0.9259	40|73|152|160|201|213|244|427|450|703|750|765|843|852|853|856|906|1075|1083|1104|1192|1195|1237|1297|1333|1389|1429|1432|1498|1519|1668|1738|1841|1842|1978|1982|1991|2189|2285|2305|2450|2474|2475	0.9623|0.9091|0.9492|0.9615|0.9057|0.9091|0.9123|0.9661|0.9091|0.9464|0.9322|0.9322|0.918|0.9032|0.9153|0.9483|0.9032|0.9091|0.9091|0.9032|0.9286|0.9118|0.9538|0.9672|0.9|0.9|0.9344|0.9048|0.9286|0.9559|0.9107|0.9048|0.9167|0.9062|0.9444|0.9211|0.9571|0.9286|0.9107|0.9577|0.95|0.963|0.9474
B0035.8	427|431|432	0.9474|0.9459|0.9211	387	0.9231	428|429	0.9474|0.9474	410	0.9
B0041.2a.1	899|946|955|988|1004|1113|1221|1232|1256|1297|1301|1303|1427|1659|1732|1768|1879|1956|2020|2283|2313|2377|2484|2563|2681|2682	0.9167|0.913|0.9167|0.9091|0.913|0.9|0.9167|0.9167|0.9167|0.9167|0.9167|0.9091|0.9091|0.9167|0.92|0.913|0.9167|0.9231|0.9286|0.9333|0.913|0.931|0.9048|0.9375|0.9355|0.931	900|944|989|1005|1098|1222|1257|1355|1421|1451|1660|1663|1679|1862|1880|2240|2502|2680	0.9091|0.913|0.9048|0.9091|0.9091|0.913|0.9167|0.9|0.9|0.9048|0.913|0.913|0.9091|0.9048|0.9091|0.9167|0.9231|0.931	1233|1239|1300|1616|1688|1731|2561	0.9167|0.9|0.9167|0.913|0.92|0.9231|0.9062	831|898|945|1008|1045|1085|1099|1234|1302|1356|1422|1423|1426|1664|1689|1733|1769|1881|1958|2021|2049|2241|2285|2503|2562|2565|2634|2635|2949|3072	0.9048|0.9091|0.9091|0.9048|0.9|0.9091|0.9|0.9167|0.92|0.9048|0.913|0.9048|0.913|0.9091|0.9167|0.92|0.9167|0.9048|0.9259|0.9259|0.9|0.9259|0.9032|0.9286|0.9375|0.92|0.9286|0.9032|0.9091|0.913
B0041.2a.2	2237|2238|2239|2423	0.913|0.9091|0.913|0.9048	2954	0.9048	2421	0.9	2145|2363|2422|2955	0.9|0.9048|0.9|0.9
B0041.2c.1	306|377|925|949|1004|1029|1060|1097|1221|1232|1238|1256|1574|1653|1950|2014|2035|2189|2275|2277|2306|2498|2557|2630|2661|2675|2676|2974	0.92|0.92|0.92|0.9167|0.9286|0.9167|0.9048|0.9259|0.9259|0.9091|0.9167|0.9259|0.9167|0.9231|0.9259|0.9259|0.92|0.9091|0.92|0.9259|0.92|0.913|0.913|0.913|0.9048|0.9048|0.9091|0.9048	239|304|575|989|1005|1098|1100|1257|2278|2496|2674	0.9048|0.9167|0.9091|0.9167|0.92|0.9259|0.913|0.9231|0.9231|0.9|0.9	1233|1239|1240|1359|1712|1725|2280|2555	0.92|0.913|0.9167|0.9091|0.9048|0.913|0.9048|0.913	195|196|240|305|375|531|853|864|948|1006|1059|1086|1096|1099|1234|1258|1512|1573|1583|1655|1658|1683|1844|1935|2015|2016|2187|2235|2279|2305|2497|2556|2559|2629|2843|2975	0.9|0.9091|0.913|0.9167|0.9048|0.92|0.913|0.9167|0.913|0.913|0.9167|0.92|0.92|0.9259|0.9167|0.92|0.9167|0.913|0.9|0.913|0.913|0.9091|0.9091|0.9259|0.9259|0.9231|0.9091|0.9167|0.9231|0.9167|0.913|0.913|0.9|0.9091|0.9048|0.9048
B0041.2d	325|431|918|944|965|974|1007|1023|1031|1048|1077|1116|1132|1151|1152|1240|1251|1257|1275|1312|1316|1320|1322|1352|1443|1446|1547|1549|1678|1681|1696|1697|1736|1742|1751|1860|1861|1898|1963|1975|2010|2039|2300|2302|2331|2396|2397|2398|2523|2582|2624|2625|2655|2700|2701|2733|2867|2956|2978|2999|3001	0.9412|0.9167|0.9072|0.9694|0.9574|0.9495|0.949|0.9813|0.9342|0.92|0.9053|0.9505|0.9186|0.9126|0.9505|0.9828|0.955|0.9694|0.9829|0.9327|0.9732|0.9569|0.9196|0.934|0.9074|0.9211|0.9478|0.9053|0.9836|0.9515|0.9667|0.95|0.984|0.9109|0.9435|0.9159|0.9496|0.9237|0.9083|0.9706|0.9052|0.9528|0.944|0.9853|0.9145|0.9658|0.9394|0.9274|0.9606|0.9673|0.96|0.9512|0.935|0.986|0.9855|0.967|0.9147|0.907|0.9237|0…	230|258|323|594|849|945|963|975|1008|1024|1050|1117|1241|1276|1314|1317|1318|1353|1440|1470|1548|1634|1679|1682|1698|1700|1862|1899|1976|2259|2303|2521|2699|2995|3113	0.9231|0.9344|0.9545|0.9429|0.9118|0.9457|0.9022|0.9103|0.957|0.9806|0.9278|0.9583|0.97|0.9828|0.9558|0.9123|0.9397|0.9286|0.9091|0.902|0.9464|0.913|0.9836|0.9434|0.9685|0.9074|0.9352|0.9196|0.9848|0.9263|0.9769|0.9478|0.9783|0.912|0.912	199|1103|1114|1252|1258|1259|1319|1384|1635|1707|1737|1749|1750|1868|2111|2305|2580|2666	0.9344|0.981|0.914|0.982|0.9375|0.908|0.9558|0.9355|0.968|0.9744|0.9758|0.9|0.9685|0.9333|0.9192|0.9455|0.9669|0.9262	171|172|193|198|214|259|268|324|394|433|499|550|595|596|850|859|946|964|976|1025|1064|1078|1104|1105|1115|1118|1153|1242|1253|1277|1315|1354|1441|1442|1444|1445|1537|1538|1546|1636|1637|1680|1683|1708|1709|1738|1744|1752|1869|1962|1977|2040|2041|2260|2301|2304|2330|2522|2581|2584|2653|2654|2667|2856|2977|2997|3000|3091|3114	0.9167|0.9355|0.9344|0.9245|0.963|0.9545|0.9273|0.9545|0.9322|0.9275|0.9|0.9138|0.9143|0.9067|0.9136|0.9452|0.9457|0.9176|0.9036|0.951|0.9111|0.9062|0.972|0.9626|0.9247|0.9694|0.9175|0.96|0.9821|0.9725|0.9565|0.9266|0.9429|0.9439|0.9231|0.9655|0.9439|0.9279|0.9196|0.9492|0.9449|0.9685|0.958|0.9829|0.9406|0.9677|0.9333|0.9339|0.9074|0.9|0.9778|0.9688|0.9612|0.9455|0.9213|0.9789|0.9304|0.964|0.9669…
B0041.2e	1676|1691|1693|1915|1979|2242|2336|2337|2338|2522|2564|2565|2640|2641|2939	0.9048|0.913|0.9091|0.92|0.9259|0.9231|0.9048|0.9268|0.9474|0.9592|0.9118|0.9189|0.9348|0.9512|0.9231	1619|1916|2243|2639|2938|3053	0.9048|0.9259|0.9333|0.9211|0.9|0.9574	1647|1677|1690|2520|2624	0.9048|0.9091|0.9091|0.9592|0.9091	1620|1648|1678|1692|1917|1980|1981|2200|2244|2462|2521|2940	0.9|0.9048|0.9091|0.9|0.9259|0.9|0.9|0.9|0.9444|0.907|0.9592|0.9
B0041.3	4|56|126|233|276|398|446|491	0.9231|0.9149|0.9636|0.9149|0.9245|0.9348|0.9259|0.9211	72|74|78|168	0.92|0.9091|0.9273|0.9184	125|231|249	0.907|0.9362|0.9149	6|9|58|73|76|77|127|169|248|397|445	0.9348|0.9545|0.9111|0.92|0.9444|0.963|0.96|0.9483|0.902|0.9623|0.9167
B0041.4	38|41|42|105|128|148|249|269|470|545|613|614|729|778|779|785|893|894|923|942|986|1023	0.9806|0.9705|0.9466|0.9239|0.9476|0.9366|0.9092|0.9305|0.9656|0.9862|0.9165|0.918|0.9903|0.9958|0.9895|0.904|0.9246|0.9374|0.9263|0.9102|0.9655|0.9829	39|129|199|447|782|1021	0.9924|0.9383|0.9585|0.9129|0.9222|0.9598	15|104|200|268|275|396|471|727|728|781|941|1022	0.921|0.9344|0.9498|0.9505|0.9124|0.9096|0.9647|0.9461|0.9702|0.9668|0.9129|0.9817	40|127|149|198|248|250|270|296|469|544|546|730|777|780|784	0.9975|0.9473|0.9432|0.9724|0.9128|0.9374|0.9119|0.94|0.9076|0.9898|0.9835|0.9817|0.9953|0.9766|0.9099
B0041.5a	17|25|69|98|193|286|406|678|918|1198|1199|1351|1392|1394	0.9062|0.9074|0.92|0.9016|0.9365|0.9265|0.9|0.9048|0.9615|0.942|0.9375|0.9524|0.9036|0.9062	70|116|287|838|919|975|1070|1094	0.9178|0.9077|0.9062|0.9351|0.9342|0.9118|0.9615|0.9067	194|350|649|1069|1352	0.9718|0.9153|0.95|0.9518|0.9367	16|32|71|117|195|330|454|501|650|839|905|906|920|974|1092|1353	0.9194|0.9091|0.9189|0.9275|0.973|0.9038|0.9275|0.9298|0.9481|0.9359|0.9143|0.9296|0.913|0.9286|0.9324|0.9625
B0041.6a	263|265|386	0.931|0.92|0.9231	264	0.9286			262|385	0.9286|0.9231
B0041.6b	262|264|371	0.92|0.913|0.913	263	0.92			261|329|359|372	0.9167|0.9048|0.9|0.9048
B0041.7.2	969|1040|1117|1123|1168|1172|1193|1206|1232|1268|1269|1332|1367|1368|1818|1868|1869|1870|1931|2014|2136|2222|2254|2405|2426|2478|2492|2526|2527|2550|2585|2599|2602|2603|2604|2617|2656|2658|2684|2757|2805|2830|2866|2867|3008|3230|3326|3382|3387|3393|3395|3410|3521|3596|3633|3699|3830|3878|4071|4082|4315	0.913|0.9091|0.9167|0.9259|0.92|0.9167|0.9231|0.9167|0.913|0.9231|0.92|0.9333|0.9286|0.9259|0.9286|0.9412|0.9429|0.9091|0.9394|0.931|0.9091|0.9444|0.9091|0.9394|0.9032|0.9091|0.9032|0.9302|0.9048|0.9429|0.9286|0.9333|0.9565|0.9565|0.9333|0.9286|0.9388|0.9318|0.9024|0.9231|0.925|0.9062|0.9362|0.9444|0.9375|0.9423|0.9231|0.9388|0.9231|0.9091|0.9667|0.9057|0.9655|0.9091|0.9048|0.9231|0.95|0.9273|0.9…	967|1110|1331|1362|1369|1706|1781|1817|2240|2493|2583|2586|2676|2828|3302|3389|3396|3522|3720|3831|4080	0.9091|0.92|0.931|0.9|0.9231|0.9333|0.9286|0.9231|0.9062|0.9032|0.9565|0.9535|0.9|0.9143|0.9298|0.9074|0.9286|0.9661|0.9333|0.9365|0.918	893|968|1085|1170|1705|1932|2015|2579|3325|3632|4152	0.9|0.913|0.913|0.92|0.913|0.9375|0.9355|0.9024|0.9167|0.9|0.9	1086|1087|1115|1119|1169|1207|1333|1363|1708|1819|1825|1933|2077|2239|2253|2476|2503|2525|2584|2587|2655|2657|2756|2758|2807|2868|2871|3232|3327|3388|3394|3397|3523|3595|3597|3697|3698|3722|3832|3901|4081|4279|4311	0.92|0.92|0.9286|0.913|0.9167|0.9286|0.931|0.9091|0.9167|0.9394|0.9118|0.9062|0.9412|0.9|0.9333|0.9211|0.9118|0.9302|0.9362|0.9348|0.9348|0.913|0.9216|0.9388|0.9556|0.9545|0.9302|0.9091|0.9057|0.9184|0.9038|0.9322|0.9474|0.9643|0.9333|0.9697|0.9254|0.9091|0.9531|0.9206|0.9375|0.9138|0.9057
B0041.8.1	61|145|226|365|368|382|417|670|704|798|799|800|831|857|874|875|877	0.9167|0.9056|0.9034|0.9202|0.9621|0.925|0.9091|0.9091|0.9856|0.9862|0.9541|0.9252|0.9444|0.9695|0.9343|0.9318|0.9576	227|369|705|784|855|873|879	0.9531|0.9319|0.984|0.9184|0.9679|0.9209|0.9151	366|797|829	0.9158|0.967|0.9558	48|228|367|370|539|621|669|706|786|830|856|878	0.9|0.9421|0.9557|0.9536|0.9005|0.9064|0.9539|0.9731|0.933|0.9463|0.9683|0.9252
B0198.1	196|487|488|522|523|524|640|793|799|864|996|1018|1028|1086|1087|1158|1241|1242|1391	0.9459|0.9|0.9268|0.9268|0.9318|0.9268|0.9286|0.9149|0.913|0.9167|0.9|0.9111|0.92|0.9318|0.9388|0.9583|0.9434|0.9231|0.9286	7|11|20|160|162|281|340|641|794|800|1029|1088|1389	0.9167|0.92|0.9167|0.9286|0.9111|0.925|0.9545|0.9167|0.9362|0.9348|0.9|0.9167|0.9189	18|21|727|1240	0.9167|0.9412|0.9388|0.9434	6|10|131|161|262|282|341|342|345|534|728|729|795|801|834|865|1159|1243|1390	0.9231|0.9091|0.9143|0.9318|0.925|0.9024|0.9565|0.9565|0.9167|0.907|0.9388|0.9149|0.9608|0.9184|0.9268|0.907|0.9592|0.9348|0.9
B0205.11	21|246|273|355|410|439|690|704|707|735|751|753|830|873|874|882	0.9625|0.9|0.944|0.9038|0.9407|0.9048|0.9608|0.9527|0.9225|0.9286|0.9739|0.9464|0.9051|0.9407|0.9462|0.9742	19|247|274|333|408|691|705|752|828|875	0.9273|0.9375|0.9167|0.9008|0.9118|0.9388|0.9812|0.98|0.9801|0.9137	169|440|520	0.9286|0.9515|0.9037	22|161|170|248|275|332|441|692|706|750|829|883|933	0.9487|0.9444|0.9426|0.9606|0.9174|0.9685|0.9279|0.9577|0.9879|0.9247|0.9388|0.9333|0.9074
B0205.12	36|111|114|148	0.907|0.9464|0.9608|0.902	112|159|201	0.9649|0.9412|0.9333			113|126|160|202	0.9455|0.9423|0.9362|0.907
B0205.1a	31|32|59|315|317|331|332|333|334|435|617|623|708|780|1095|1125|1156|1198|1267|1293|1295|1350|1555|1575|1596|1598|1667|1708|1788|1950|2025|2209|2426|2509|2510	0.913|0.9167|0.913|0.92|0.9091|0.9259|0.9286|0.931|0.9286|0.9048|0.9048|0.9167|0.92|0.9259|0.913|0.9167|0.92|0.9032|0.931|0.9375|0.9286|0.9355|0.9394|0.9412|0.9143|0.9231|0.9062|0.9429|0.9429|0.9091|0.9375|0.9375|0.9487|0.9444|0.9091	436|781|1199|1268|1351|1509|1556|1709|1786|2519	0.9167|0.9167|0.9259|0.9259|0.931|0.9167|0.9355|0.9167|0.931|0.9	77|87|583|675|676|1574|2005|2208|2330|2521	0.9048|0.913|0.9167|0.913|0.9|0.9062|0.9091|0.9355|0.9355|0.9259	60|88|316|624|737|782|1197|1200|1205|1294|1349|1557|1576|1594|1595|1613|1710|1766|1787|1789|1885|1949|2066|2226|2331	0.9048|0.9|0.9259|0.913|0.9231|0.9|0.9259|0.9259|0.9259|0.9375|0.9355|0.9333|0.9143|0.9091|0.9375|0.9091|0.9091|0.9167|0.9394|0.9429|0.9062|0.9118|0.9333|0.9|0.9375
B0205.1b	48|94|107|123|124|125|227|415|531|572|754|990|998|1059|1085|1257|1294|1347|1367|1388|1406|1407|1500|1580|1582|1798|1817|2001|2064|2218|2301|2302	0.913|0.92|0.9231|0.9167|0.931|0.9286|0.9231|0.9259|0.92|0.92|0.9|0.9394|0.9091|0.9062|0.9429|0.9091|0.9231|0.9459|0.9189|0.9429|0.9412|0.9091|0.9444|0.9444|0.9286|0.9444|0.9062|0.9231|0.931|0.9429|0.9394|0.9394	254|528|573|918|991|1083|1348|1501|1578|1818|2124|2219	0.92|0.9167|0.92|0.9259|0.9062|0.9|0.9412|0.9143|0.931|0.92|0.9062|0.9231	467|468|805|886|988|1163|1174|1366|1797|2122|2300	0.9231|0.92|0.92|0.9|0.9|0.9048|0.9143|0.9167|0.9118|0.9394|0.9	108|416|529|574|697|804|919|989|997|1061|1086|1141|1175|1256|1349|1368|1386|1387|1405|1499|1502|1559|1579|1581|1677|2123|2195	0.9231|0.9231|0.9333|0.92|0.9231|0.9091|0.9167|0.9|0.9062|0.9259|0.9333|0.9091|0.9118|0.9091|0.9412|0.9459|0.9444|0.9444|0.9412|0.9118|0.9062|0.9118|0.9429|0.9444|0.9032|0.9429|0.9
B0205.3.1	68|149|153|271|274|376|641|671|694|789|935|945|965|971|990|993|1004|1012|1046|1076|1079|1082|1088|1097|1098|1099|1110|1111|1181|1259|1274	0.9057|0.9455|0.9537|0.9839|0.9314|0.955|0.9151|0.9293|0.9588|0.9675|0.9658|0.9252|0.9048|0.9406|0.9245|0.9597|0.9208|0.9851|0.9434|0.9196|0.976|0.9455|0.9483|0.9655|0.9844|0.9592|0.9492|0.9496|0.9027|0.9492|0.9519	150|228|272|513|660|695|933|966|1013|1077|1080|1096|1258|1260|1272	0.9474|0.9109|0.9839|0.9292|0.9121|0.9293|0.9174|0.9|0.9762|0.9841|0.9381|0.9048|0.9573|0.9655|0.9722	152|937|1047	0.9239|0.9101|0.91	151|273|398|423|788|790|791|868|934|936|967|989|991|992|1014|1048|1078|1081|1087|1089|1170|1268	0.9837|0.9821|0.9052|0.914|0.9224|0.9769|0.9123|0.9263|0.9717|0.9646|0.9402|0.9217|0.9273|0.937|0.968|0.9528|0.968|0.9835|0.9643|0.9091|0.91|0.9174
B0205.3.2	92|247|431|437|482|617|795|941|969|988|1022|1055|1058|1073|1074|1235|1250	0.931|0.9487|0.9167|0.9062|0.9459|0.9167|0.9487|0.9143|0.9268|0.9412|0.9545|0.902|0.95|0.9286|0.9545|0.9362|0.9231	248|600|671|942|989|1053	0.9444|0.9459|0.9143|0.9524|0.9348|0.9362	648|1023	0.9|0.9565	127|249|373|432|766|767|856|912|943|987|990|1024|1057|1063|1146	0.9032|0.9091|0.9375|0.9062|0.9149|0.9318|0.9189|0.9024|0.9574|0.9091|0.9149|0.9574|0.9545|0.9024|0.9
B0205.4	103|226|471|546|775|777|941|1022|1158|1165|1237|1295	0.9091|0.9048|0.9|0.9|0.92|0.9091|0.92|0.9167|0.92|0.9231|0.9048|0.9048	153|224|588|942|1020|1294	0.9048|0.9048|0.9048|0.9091|0.9|0.9167	590|680|1283	0.9048|0.913|0.92	154|225|393|547|589|681|682|940|1021|1239|1284|1285	0.9|0.9|0.9|0.9091|0.9048|0.9|0.9|0.9167|0.9091|0.9|0.92|0.92
B0205.6	73|99|162|213|214|256|453|455|589|612|631|632|777|845|852|858|860|870|951|1100|1275|1276|1366	0.9333|0.9697|0.9074|0.9167|0.9|0.9167|0.918|0.963|0.9273|0.931|0.9149|0.9322|0.9429|0.9298|0.9375|0.9032|0.9697|0.96|0.9091|0.902|0.92|0.9423|0.918	100|255|454|769|846|853|871|999	0.9692|0.9153|0.9516|0.9455|0.95|0.9038|0.9459|0.9231	20|72|199|588|776|807|963|1102	0.9184|0.9344|0.9107|0.9038|0.9571|0.9333|0.9038|0.9062	21|74|101|200|204|493|770|771|778|833|859|862|869|953|1172|1367	0.902|0.9444|0.9697|0.918|0.931|0.9483|0.9701|0.9531|0.9296|0.9|0.9|0.9048|0.9265|0.9216|0.9032|0.95
B0205.7	124|189|202|240|241|243|244|263|264|399|409|481|501|663|671|684|752|769|845|1000|1036|1040|1042|1078|1155|1206|1207|1216|1257|1258|1259|1335|1336	0.9053|0.9494|0.9344|0.9387|0.9343|0.9561|0.9259|0.9373|0.9759|0.9251|0.931|0.9049|0.9441|0.9851|0.9161|0.9268|0.9184|0.9198|0.9115|0.9045|0.9747|0.9831|0.9739|0.9885|0.9538|0.9487|0.9459|0.9519|0.9435|0.9153|0.9695|0.9625|0.9512	103|125|190|265|316|410|482|502|665|795|1034|1079|1205	0.9115|0.9459|0.941|0.9706|0.9299|0.91|0.96|0.9514|0.9901|0.913|0.9207|0.9026|0.9632	317|716|751|948|1041|1076	0.9179|0.9869|0.9683|0.9041|0.9907|0.9908	104|126|142|191|203|218|242|400|408|483|503|664|685|717|718|750|791|793|949|1038|1039|1043|1077|1334	0.9488|0.9452|0.9062|0.9448|0.9169|0.9164|0.9868|0.9423|0.9228|0.9691|0.9601|0.9853|0.9049|0.9701|0.9113|0.9615|0.9377|0.9185|0.9239|0.9389|0.9796|0.9559|0.9907|0.9418
B0205.8.1	75|77|79|92|237|249|363|419	0.9701|0.9322|0.9344|0.9375|0.9038|0.9298|0.9577|0.9016	60|184|250|328|364	0.9048|0.9318|0.9455|0.9344|0.9412	74	0.9231	76|127|186|329|365	0.9692|0.9057|0.9038|0.9688|0.9524
B0205.8.2	309|329	0.9048|0.9048
B0205.9	24|48|59|60|108|171|173|306|312|314|408|422|566|569|642|664|686|697|699|716|717|719|722|795|798|925|949|994|1057|1086|1180|1340|1438|1545|1611|1612|1651|1705|1808	0.9048|0.9683|0.9688|0.9167|0.9107|0.9333|0.9355|0.9565|0.9394|0.9167|0.9571|0.9394|0.9286|0.92|0.9615|0.9385|0.942|0.9367|0.963|0.9275|0.9452|0.9189|0.9|0.9265|0.9178|0.9756|0.92|0.9275|0.9286|0.9054|0.9125|0.9028|0.9149|0.9138|0.9545|0.9032|0.9118|0.9315|0.9677	172|423|567|570|643|687|796|799|801|924|1058	0.9508|0.9524|0.9722|0.9298|0.9494|0.9375|0.9359|0.9028|0.9437|0.961|0.9437	661|993|1029|1085|1437|1570|1817	0.9403|0.9014|0.9762|0.9067|0.9625|0.9474|0.9167	23|46|47|249|308|313|362|410|424|568|644|663|698|700|715|797|800|803|950|995|1030|1031|1181|1337|1339|1571|1818	0.9138|0.9545|0.9508|0.9231|0.9016|0.9041|0.9206|0.918|0.9273|0.9595|0.96|0.9589|0.9625|0.9048|0.9206|0.9221|0.92|0.9074|0.9444|0.9125|0.9759|0.9756|0.9012|0.9048|0.9041|0.9359|0.9091
B0207.4	22|49|56|134|165|211|246|248|263|308|421|423|443|511|512|526|530|755|756|782|825|849|857|869|904|977|979|984|1018|1019	0.9029|0.9082|0.9456|0.9014|0.9124|0.975|0.9608|0.9178|0.9504|0.96|0.9118|0.9466|0.9742|0.9111|0.9507|0.9503|0.9753|0.9647|0.9551|0.9007|0.9244|0.9226|0.9461|0.9375|0.9657|0.9645|0.9058|0.9252|0.9704|0.9396	54|136|166|324|513|527|635|858|870|967|978|1043|1045|1081	0.9184|0.9487|0.9167|0.9419|0.9645|0.9262|0.9007|0.9267|0.9091|0.9036|0.9486|0.9195|0.9506|0.9339	103|164|306|322|340|442|646|714|824|848|906|1079	0.9677|0.9286|0.9257|0.9211|0.9306|0.9737|0.94|0.9598|0.9253|0.9119|0.9325|0.9528	55|104|105|135|137|212|247|262|301|302|305|307|310|323|528|529|531|757|780|797|826|905|1017|1044|1080	0.9091|0.9753|0.9884|0.9111|0.9265|0.9231|0.9618|0.9041|0.9085|0.9161|0.9106|0.931|0.9021|0.9591|0.9583|0.9262|0.906|0.9308|0.9185|0.9048|0.9213|0.9538|0.9551|0.9313|0.9496
B0207.6	37|318|523|524|612|651|664|728|750|811|812|883|950	0.9|0.9231|0.902|0.9167|0.902|0.92|0.902|0.9184|0.9455|0.9464|0.9153|0.9111|0.963	24|157|193|319|613|748|751	0.9333|0.9302|0.9211|0.9623|0.9111|0.902|0.9286	349|522|810|816|948	0.9184|0.9348|0.9444|0.9231|0.9074	23|194|240|348|382|383|438|499|614|752|949	0.9318|0.9268|0.9286|0.9286|0.9535|0.9318|0.9318|0.9074|0.9245|0.9048|0.9623
B0213.17	78|164|174|185	0.913|0.9375|0.9394|0.9355	8|79|163|175	0.931|0.9|0.9062|0.9	74|171	0.9333|0.9333	73|103|125|172|173|176	0.931|0.9333|0.9231|0.9394|0.9412|0.9062
B0213.4	244|265|330	0.9189|0.9474|0.913	245|317	0.9167|0.9259			37|246|248|249|263|264|329	0.9091|0.9211|0.9231|0.9231|0.9412|0.9211|0.9167
B0213.5	470|471|611	0.9048|0.9091|0.913	472	0.9			612	0.9048
B0213.6	191|213|214|244|339|360|363|432|433	0.9015|0.935|0.9463|0.9171|0.9867|0.9118|0.91|0.9842|0.9689	243|340|349|431	0.9722|0.9545|0.9465|0.9679	179|376|377	0.9353|0.9091|0.9106	178|242|338|348|362	0.9082|0.9144|0.96|0.913|0.9403
B0218.2	1855	0.9048					1625|1856	0.9|0.9048
B0218.3	91|110|416|603|947|948|983|992|1025|1032|1124|1256|1432|1482|1505	0.913|0.9459|0.9643|0.9091|0.95|0.9508|0.9322|0.9032|0.9394|0.9167|0.9706|0.9|0.9231|0.9|0.9423	300|417|638|774|908|1026|1031|1125|1164|1282|1433|1435	0.913|0.9608|0.92|0.9038|0.9483|0.9524|0.918|0.9524|0.9016|0.9692|0.9692|0.9138	406|859|941	0.907|0.9074|0.9302	379|405|418|605|639|946|1027|1030|1039|1126|1163|1281|1283|1434	0.9375|0.9091|0.92|0.907|0.9038|0.9667|0.9672|0.9688|0.9057|0.9403|0.9057|0.9032|0.9074|0.9394
B0222.6	181|184|188|190|324|342|360|369|378|392|452|633|666|819|845|896	0.9022|0.9778|0.9167|0.9344|0.9615|0.9107|0.975|0.9029|0.9754|0.9175|0.9492|0.9244|0.9009|0.9746|0.9341|0.96	182|185|225|454|655|897|898|906	0.97|0.9167|0.9451|0.9569|0.9184|0.9817|0.9554|0.908	189|358|359|376|377|393|456|457|551|578|632|680|683	0.9512|0.964|0.9746|0.9545|0.9831|0.9623|0.931|0.9211|0.9174|0.9009|0.9224|0.9074|0.91	178|183|186|187|325|343|361|379|394|453|634|667|820|844	0.973|0.9381|0.9462|0.9518|0.9362|0.9279|0.9737|0.9554|0.9727|0.9369|0.9062|0.9238|0.9369|0.9362
B0222.8	50|124|186|326|344|347|362|371|380|434|454|554|581|668|686|821|898|914	0.9091|0.9242|0.9789|0.9467|0.9795|0.9213|0.9701|0.911|0.9817|0.9041|0.9512|0.9375|0.9006|0.9686|0.9375|0.9651|0.9565|0.9	125|184|227|456|657|899|900	0.9259|0.9648|0.9389|0.9367|0.9091|0.9801|0.9733	37|191|360|361|378|379|395|459|553|634|685|820|829	0.9141|0.9434|0.9338|0.9634|0.9252|0.9701|0.9613|0.9051|0.9518|0.9119|0.9412|0.902|0.9012	180|185|188|228|327|345|346|363|381|396|455|555|669|822|913	0.9407|0.9448|0.9603|0.9032|0.9219|0.9684|0.9362|0.9742|0.9615|0.9742|0.949|0.9141|0.9367|0.9423|0.9022
B0228.4a	4493|4494|4611|4613|4792	0.9|0.9048|0.9048|0.9091|0.913			4461|4612	0.9048|0.9048	4127|4462|4495|4614|4897|4898	0.9|0.9|0.9048|0.9091|0.9091|0.9091
B0228.6	125|127|137|155|320|369|380|469|529|578|658|737|813|815	0.9835|0.9738|0.901|0.9231|0.934|0.9204|0.9522|0.9483|0.9422|0.9309|0.9667|0.9677|0.9752|0.9696	342|579|811|812|854	0.9665|0.9545|0.9717|0.931|0.9058	368|378|713|735	0.9059|0.9548|0.9419|0.9882	106|124|126|154|343|468|580|622|659|736|814	0.9157|0.9835|0.9835|0.9299|0.9314|0.9476|0.9234|0.9415|0.9567|0.9727|0.9703
B0228.7.2	154|174|193|195|219|285|288|321|421|435|437|468|536|538|540|565|598|682|683|693|771|772|822|844|846|878|926|971|972|1004	0.9048|0.9474|0.95|0.9643|0.9231|0.9423|0.9149|0.9302|0.9167|0.9149|0.9434|0.9111|0.9423|0.9423|0.9167|0.9655|0.9074|0.9545|0.9024|0.9|0.9091|0.9038|0.9492|0.9298|0.9286|0.9348|0.9455|0.925|0.95|0.9062	322|521|559|566|607|678|939	0.9|0.9149|0.9231|0.9636|0.9167|0.9216|0.92	539|558	0.9273|0.907	151|152|173|194|221|287|378|520|537|567|618|770|845|938	0.9362|0.9623|0.9273|0.9655|0.9388|0.9245|0.9423|0.9302|0.9643|0.9444|0.925|0.9107|0.9464|0.9057
B0238.1	1401|1634|1655	0.9091|0.9|0.9091			1239	0.9	1171|1191|1402|1636|1637|1701	0.9048|0.9048|0.9091|0.9091|0.913|0.9091
B0238.10.1	102|124|135|137|170|179|180|185|231|232|260|273|276|342|380|662|831|843|849|909|910	0.928|0.9327|0.9846|0.9457|0.9159|0.9569|0.9492|0.9273|0.9237|0.9065|0.9048|0.9615|0.9766|0.9016|0.9774|0.9048|0.9389|0.9466|0.9517|0.9084|0.9379	56|181|261|274|334|537|832|844|1040	0.9412|0.9402|0.9407|0.9778|0.9244|0.9298|0.9724|0.9671|0.925	44|54|125|134|300|341|500|911	0.9386|0.935|0.9821|0.9417|0.9327|0.9048|0.9681|0.9524	46|55|71|101|103|126|136|161|168|262|275|277|285|335|381|487|516|703|734|833|845|848	0.9211|0.9449|0.9231|0.9365|0.9412|0.9664|0.9732|0.9048|0.9455|0.9043|0.9783|0.9322|0.9279|0.928|0.968|0.92|0.912|0.9154|0.9191|0.9862|0.9527|0.9583
B0238.10.2	907	0.9	842	0.9259	909	0.913	843|848	0.9286|0.9048
B0238.11	27|223|227|228|268|356|390|443|543|570|732|735|736|738|751|868|937|1098|1099	0.9471|0.9035|0.9383|0.9357|0.9637|0.9093|0.9038|0.9621|0.9599|0.9434|0.9731|0.9368|0.9726|0.9774|0.9781|0.9779|0.9592|0.9286|0.9428	29|224|226|442|444|536|542|544|546|733|739|1007|1097	0.9145|0.9433|0.9676|0.9626|0.9446|0.9423|0.9479|0.9902|0.9661|0.9627|0.9357|0.9383|0.9071	220|267|325|355|537|814|869	0.9103|0.9422|0.9324|0.9684|0.9605|0.9838|0.9551	16|28|107|225|323|342|354|389|545|572|639|734|737|740|815|816|870	0.9286|0.9226|0.9003|0.9321|0.9199|0.9477|0.9305|0.9313|0.9526|0.9034|0.9799|0.9726|0.9499|0.9103|0.9882|0.9756|0.96
B0238.9	418|466|1549|1551|1612|1661|1825|1995	0.9048|0.9|0.9259|0.9286|0.9231|0.931|0.9231|0.9091	1843|1850	0.92|0.9259	598|1568	0.9|0.9231	599|1550	0.9091|0.9333
B0240.4	13|43|290|332|729|877|900|910|921|924|933|1072|1090|1160|1161|1168|1225|1247|1249|1261|1310|1505|1540|1669|1743|1757|1759|1857	0.9196|0.9569|0.9664|0.9286|0.9521|0.9318|0.913|0.9697|0.9091|0.9615|0.9718|0.9291|0.9274|0.9118|0.9593|0.9403|0.9801|0.904|0.9185|0.9153|0.9688|0.9134|0.9219|0.9276|0.9664|0.9209|0.9353|0.9346	14|44|227|261|330|334|730|787|911|922|1016|1046|1073|1091|1162|1169|1226|1250|1399|1489|1490|1703|1744|1760|1786|1859	0.9333|0.958|0.9831|0.9018|0.9174|0.9098|0.9437|0.9263|0.9724|0.9538|0.916|0.9556|0.9573|0.935|0.9254|0.9389|0.986|0.9512|0.9252|0.9355|0.9469|0.9014|0.9799|0.936|0.9384|0.9805	368|912|935|1211|1309|1397|1398|1508|1618|1668|1688|1784	0.9274|0.9695|0.927|0.9259|0.9106|0.9789|0.9767|0.942|0.9082|0.9494|0.9792|0.9379	12|45|228|266|333|369|394|728|783|797|899|923|934|1017|1047|1074|1092|1170|1227|1248|1251|1271|1368|1455|1506|1670|1689|1690|1745|1785|1858|1940	0.9307|0.9545|0.9478|0.9291|0.9206|0.9141|0.9107|0.9286|0.912|0.9559|0.9051|0.963|0.9231|0.9191|0.9323|0.9185|0.9344|0.9291|0.9726|0.9015|0.9106|0.9297|0.927|0.9014|0.9618|0.911|0.972|0.9812|0.9686|0.9463|0.9744|0.9231
B0244.2	288|290|325|327|422|426|500|521|611|612|691|830|923|985|1005|1007|1364|1372|1374|1424|1451|1541|1580|1657|1660|1706|1784|2000|2003|2160|2172|2192|2270|2367|2444|2582|2584|2585|2597|2598|2601|2603|2613	0.9107|0.9649|0.913|0.9348|0.9348|0.9434|0.907|0.9189|0.9608|0.9375|0.9273|0.9355|0.9333|0.918|0.9322|0.9074|0.9149|0.95|0.95|0.9107|0.9355|0.9|0.9444|0.9123|0.9667|0.971|0.942|0.9552|0.9315|0.9394|0.9167|0.971|0.9|0.9437|0.9516|0.9538|0.95|0.9474|0.96|0.9714|0.9242|0.9231|0.9111	90|291|693|831|1266|1707|1785|1998|2001|2271|2369|2555	0.9556|0.9643|0.9615|0.963|0.9062|0.9697|0.9492|0.9394|0.9726|0.9322|0.9219|0.9016	60|61|168|326|375|425|717|1502|1658|1782|1934|2161|2259	0.9429|0.9355|0.9412|0.9048|0.902|0.9057|0.9184|0.9062|0.9714|0.9016|0.9531|0.9714|0.9118	59|89|169|170|223|289|292|361|601|613|718|832|924|943|1006|1075|1118|1373|1450|1602|1659|1708|1783|1786|1999|2002|2162|2173|2190|2191|2272|2443|2538|2568|2581|2599|2602	0.9394|0.9362|0.9216|0.9592|0.9048|0.9444|0.9474|0.9318|0.94|0.9286|0.963|0.9661|0.9423|0.9245|0.9365|0.9649|0.9333|0.9683|0.9531|0.9362|0.9714|0.9706|0.9375|0.9524|0.942|0.9718|0.9583|0.9322|0.9048|0.9394|0.9322|0.9286|0.913|0.9194|0.9355|0.9231|0.9412
B0250.1	162|166|268|350|499|525|694	0.958|0.9115|0.9644|0.9017|0.9437|0.9149|0.9303	269|500|516	0.9357|0.9633|0.9539	161|351|515	0.9336|0.9366|0.9549	32|167|352|501|527|695	0.9069|0.9366|0.9313|0.9506|0.9124|0.9276
B0250.2	480|569|608|770	0.913|0.9048|0.92|0.9	764|818	0.9091|0.9	333|481|609|634	0.92|0.9167|0.92|0.9	334|386|568|763	0.9167|0.9048|0.913|0.9
B0250.5	99|123|145|247|285|454|488|489|745|746|790|800|891|954|955	0.9158|0.95|0.9118|0.9192|0.9091|0.9346|0.9074|0.9386|0.9587|0.9435|0.958|0.9273|0.914|0.9675|0.9314	117|125|471|490|952|1025|1046	0.9083|0.935|0.91|0.9145|0.9381|0.9333|0.9208	395|744|789	0.959|0.9748|0.9469	124|143|283|284|320|377|788|953|1024|1048	0.9667|0.9072|0.9762|0.9204|0.9293|0.9255|0.9541|0.959|0.936|0.9118
B0250.9.1	1057|1291|1329|1352	0.92|0.9032|0.9062|0.9091	1150|1292|1331|1380	0.9|0.9032|0.9032|0.92	784|791|1176|1290|1312	0.9091|0.9048|0.9032|0.9032|0.931	783|1056|1070|1071|1151|1152|1330|1381	0.9091|0.9048|0.9032|0.9032|0.9032|0.9|0.9062|0.913
B0250.9.2	1066|1075|1122|1178|1329|1341|1352	0.9032|0.9355|0.9259|0.9|0.9355|0.9333|0.9091	773|1077|1150	0.9048|0.931|0.931	1328|1340	0.9|0.931	774|1152	0.9091|0.9062
B0252.2.1	99|114|124|126|221|226|328|687|689|790|791|810|1078|1079|1165|1210|1275|1350|1524|1525|1801|1802|1815	0.9333|0.9062|0.9032|0.9032|0.9333|0.9|0.9444|0.9143|0.9459|0.9091|0.9|0.9444|0.9167|0.9459|0.9091|0.9375|0.9167|0.9459|0.9189|0.9444|0.9167|0.9375|0.9231	38|222|227|329|407|429|727|1158|1211|1212|1352|1364|1366	0.9091|0.9355|0.9259|0.9062|0.9375|0.9032|0.913|0.9062|0.9459|0.9333|0.9189|0.9091|0.9091	39|199|544|688|983|1203|1273|1640	0.9167|0.9167|0.9|0.9189|0.9118|0.9333|0.9333|0.9143	330|363|408|440|597|610|690|789|811|982|996|1080|1365|1490|1523|1560|1641|1803	0.9231|0.9062|0.9091|0.9062|0.9143|0.9|0.9062|0.931|0.9412|0.9032|0.9032|0.9459|0.9429|0.9091|0.9444|0.9118|0.9394|0.9062
B0252.4b	163|192|194|205|341|342|455|458|566|599|600	0.9085|0.9484|0.9474|0.951|0.9455|0.9588|0.95|0.9213|0.9008|0.9444|0.9296	244|384|553|594|601	0.9237|0.9333|0.9412|0.9437|0.9028	58|190|370|383|456	0.9091|0.9007|0.9708|0.9328|0.9714	143|164|202|203|204|340|371|372|457|565|595	0.9259|0.9392|0.963|0.9763|0.9763|0.9363|0.9704|0.9529|0.987|0.9224|0.9032
B0261.1	34|253|267|268|401|469|493|1108|1109|1110|1129|1207|1209|1480|1526|1539|1542|1543|1645|1783|1784|1815|1839|1858|1861|1970|2079|2100|2147|2182|2183|2194|2195|2331|2373|2488|2524|2526|2577	0.9048|0.9|0.913|0.9048|0.9048|0.913|0.9091|0.9394|0.9355|0.9062|0.9032|0.9394|0.92|0.9375|0.9118|0.9429|0.9355|0.9412|0.9444|0.9412|0.9118|0.9487|0.9231|0.9512|0.9091|0.9211|0.907|0.9459|0.907|0.9|0.9333|0.9583|0.9348|0.9091|0.9524|0.913|0.9512|0.9583|0.9429	266|293|1205|1208|1646|1813|1838|1856|1859|1969|2149|2171|2372|2486|2523	0.913|0.9048|0.9259|0.9394|0.9412|0.9524|0.9062|0.9535|0.9459|0.9189|0.9091|0.9355|0.9302|0.907|0.9487	294|295|1107|1128|1540|1782|2396|2398	0.913|0.9167|0.9355|0.9062|0.9211|0.9143|0.9149|0.9348	468|492|802|807|1206|1479|1524|1541|1647|1814|1857|1860|1971|2001|2148|2172|2193|2374|2397|2444|2487|2525	0.9167|0.9091|0.9048|0.92|0.9355|0.9286|0.92|0.9459|0.9412|0.9048|0.9512|0.9524|0.9459|0.9091|0.9111|0.9091|0.9512|0.9111|0.9348|0.9286|0.9302|0.9556
B0261.2a	7061|7155|7488|7596|7869|7965|8125|8163|8542	0.9|0.9091|0.913|0.9231|0.931|0.9048|0.9032|0.931|0.931	7153|7597|8099|8109|8124|8168|8366	0.913|0.9048|0.9062|0.9375|0.9333|0.9412|0.9259	7062|7851|8009|8538	0.9|0.9355|0.9091|0.9355	7063|7409|7452|7455|7489|8010|8011|8098|8110|8111|8123|8126|8539|8540	0.9048|0.9091|0.9091|0.9|0.913|0.9062|0.9032|0.9062|0.9412|0.9259|0.9333|0.931|0.9355|0.9355
B0261.2b	5150|5473|5485|5539|5609|5804|5933|5968|6283|6286|6355|6356|6492|6634|6694|6724|7044|7146|7345|7479|7486|7487|7502|7587|7860|8027|8099|8116|8118|8119|8152|8154|8160|8533	0.9|0.9048|0.9048|0.9|0.9|0.9048|0.9|0.913|0.9333|0.931|0.913|0.913|0.9375|0.9375|0.913|0.9|0.9062|0.9412|0.9|0.9118|0.913|0.92|0.9333|0.9118|0.9167|0.9259|0.9024|0.9231|0.925|0.9231|0.9487|0.9167|0.9167|0.9333	5407|5474|5540|6017|6161|6198|6219|6287|6494|6632|6745|7144|7475|7858|8090|8100|8115|8159|8511	0.9|0.9|0.9|0.9048|0.9259|0.9167|0.9032|0.9|0.9355|0.9062|0.9429|0.9143|0.913|0.9|0.9268|0.9189|0.9512|0.925|0.9032	5608|5967|6793|6949|6983|7046|7733|7842|8529	0.9048|0.913|0.9091|0.9259|0.9|0.9355|0.9091|0.9091|0.9412	5206|5475|5487|5806|6218|6285|6354|6396|6490|6493|6511|6568|6633|6722|6746|6984|7045|7077|7078|7145|7328|7400|7589|7734|8001|8002|8089|8101|8114|8117|8120|8530|8531	0.9|0.9048|0.9|0.9|0.931|0.9355|0.9231|0.9375|0.9231|0.9355|0.9091|0.9286|0.9333|0.9167|0.9429|0.9062|0.9355|0.931|0.9355|0.9412|0.9032|0.9333|0.9286|0.9167|0.9|0.925|0.9512|0.9535|0.9167|0.9167|0.9|0.9412|0.9394
B0261.4a	243|259|262|321|323|452|497|609|611|684|691|725|727|736|739|777	0.9216|0.9608|0.9535|0.9574|0.9231|0.9423|0.96|0.9444|0.9655|0.9434|0.9189|0.9286|0.9048|0.9434|0.9643|0.9268	260|263|351|685|715|737|740	0.9412|0.9348|0.9623|0.9167|0.9412|0.9038|0.9388	228|322|352|451|496|560|610|776	0.9024|0.9057|0.9434|0.9216|0.9574|0.9636|0.9655|0.9524	189|229|261|264|319|320|453|474|559|672|686|689|724|738|741	0.9268|0.9318|0.94|0.9348|0.9535|0.9024|0.9423|0.9024|0.9464|0.92|0.9608|0.925|0.9574|0.9608|0.963
B0261.4b	230|243|259|321|323|452|497|609|611|684|690|691|704|739|777	0.9268|0.907|0.9592|0.9524|0.9318|0.9348|0.9167|0.92|0.963|0.9184|0.9429|0.9487|0.9048|0.9216|0.9111	351|473|685|715	0.9149|0.9302|0.9091|0.9423	311|322|352|451|560|610	0.9286|0.9535|0.9375|0.9091|0.9615|0.9623	319|453|559|686|689|716|741	0.9474|0.9348|0.913|0.9348|0.9535|0.9608|0.9608
B0261.7	23|90|163|222|223|225|332|333|407|516|518|527|550|552|554|555|677|704|705|707|712|754|775|803|810|893|942|1026|1064|1072|1133|1134	0.9554|0.9072|0.9189|0.9381|0.9386|0.9259|0.9286|0.9328|0.9407|0.9667|0.9608|0.9587|0.9268|0.9189|0.9758|0.925|0.9538|0.9159|0.936|0.9752|0.9322|0.9587|0.9683|0.9664|0.9531|0.9531|0.9286|0.9|0.928|0.934|0.973|0.9709	220|259|334|408|456|517|676|679|752|757|895|1061|1074|1132	0.9554|0.9115|0.9407|0.913|0.902|0.9364|0.9352|0.9008|0.9504|0.9833|0.96|0.9118|0.9224|0.9434	99|129|162|318|348|526|753|777|801|808|910|988|989|1065|1071	0.9533|0.9314|0.9541|0.9262|0.9018|0.945|0.968|0.9576|0.9167|0.9558|0.9368|0.9223|0.9412|0.9487|0.916	24|130|161|221|319|320|406|528|678|706|713|758|776|802|809|894|911|983|984|987|1066|1073|1112	0.9245|0.9412|0.9358|0.9333|0.9426|0.9508|0.9091|0.9211|0.9524|0.9426|0.9138|0.9652|0.9531|0.9813|0.9695|0.9612|0.9174|0.9608|0.9537|0.9754|0.9113|0.9492|0.9167
B0261.8	51|52|53|63|79|104|120|221|302|314|389|419|422|425|446|482|519	0.9277|0.9651|0.9054|0.967|0.9474|0.9412|0.9101|0.9277|0.967|0.9189|0.9596|0.9111|0.908|0.9773|0.9195|0.9157|0.9067	122|153|417|623	0.9205|0.9|0.9167|0.9423	48|78|424|504	0.9103|0.9605|0.9802|0.9118	49|61|62|106|154|157|162|163|301|303|388|390|418|423	0.9333|0.9639|0.9432|0.9067|0.962|0.92|0.9306|0.9615|0.967|0.9773|0.9684|0.9588|0.9524|0.9278
B0272.1	68|236|370|371|456|495|895|900|938|1082|1202|1239|1264|1312|1321|1333|1374|1441|1465	0.9375|0.931|0.9429|0.9143|0.9153|0.954|0.9114|0.9268|0.9012|0.9709|0.9072|0.9444|0.9205|0.9109|0.9024|0.908|0.9437|0.9333|0.9	177|493|518|526|896|898|1084|1246|1313	0.9032|0.9186|0.9506|0.9014|0.9759|0.9205|0.96|0.9213|0.9479	235|697|1298|1372|1373	0.9146|0.9403|0.93|0.9394|0.9219	69|237|517|687|698|705|706|1083|1174|1201|1240|1299|1314	0.9103|0.9419|0.9512|0.9375|0.92|0.9444|0.92|0.9612|0.9072|0.913|0.9111|0.9388|0.949
B0272.2	73|129|163|268|292|428|430|595|646|880	0.9138|0.92|0.9474|0.942|0.9194|0.9583|0.9423|0.9231|0.9219|0.9608	162|324|429|647	0.931|0.9302|0.9697|0.9403	515	0.9123	269|427|460|648|879|882	0.9091|0.9538|0.9|0.9701|0.902|0.9091
B0272.3	134|450|518|532|558|601|745|770|834|835|907|936|950|951|1025|1036	0.9077|0.9079|0.9768|0.9177|0.9598|0.9312|0.9593|0.9303|0.9121|0.9141|0.9734|0.9813|0.9202|0.9641|0.9762|0.9097	291|387|519|700|768|772|937|1027	0.9885|0.901|0.9224|0.9283|0.9351|0.9087|0.9227|0.966	133|556|631|769|831	0.9091|0.9431|0.951|0.9043|0.9023	292|395|449|520|533|557|701|744|771|836|906|908|938|949|1017|1026|1034	0.9767|0.9023|0.9292|0.9756|0.9234|0.9482|0.9196|0.954|0.9426|0.918|0.962|0.9398|0.9209|0.9728|0.9336|0.966|0.9207
B0272.4	65|101|132|172|186|240|256|319|331|485|488|567|623|631|821	0.9091|0.9474|0.9355|0.9583|0.9296|0.9697|0.9342|0.9375|0.9487|0.973|0.9552|0.9143|0.9091|0.9394|0.9091	102|133|145|241|333|486|621|678|711|713	0.9589|0.9677|0.9275|0.9452|0.9474|0.9595|0.9452|0.9118|0.9615|0.9067	496|630	0.9118|0.9747	64|100|103|134|146|173|239|254|255|318|332|362|487|535|536|622|677|695|712|822|832	0.942|0.9079|0.9394|0.9138|0.9091|0.9583|0.9545|0.9|0.9296|0.9315|0.9481|0.9206|0.9722|0.918|0.9516|0.9583|0.9143|0.9194|0.9625|0.9344|0.9074
B0273.2.1	272|372|374|413|818|916|1141|1270|1394|1411|1495|1539|1553|1625|1652|1789|1856|1857|1858	0.9091|0.9149|0.9216|0.9649|0.9057|0.9615|0.95|0.9091|0.9091|0.9697|0.9167|0.9322|0.9508|0.9655|0.9091|0.9474|0.9434|0.9388|0.9107	376|800|806|917|1142|1200|1271|1412|1538|1771|1772|1774|1790|1864	0.9643|0.913|0.9167|0.92|0.9057|0.9149|0.9074|0.9683|0.918|0.9091|0.95|0.9|0.9643|0.907	128|645|686|972|1275|1359|1361|1436|1493|1552|1651|1660|1812	0.9259|0.9074|0.9412|0.9123|0.9153|0.9322|0.9322|0.9|0.9592|0.9286|0.9074|0.9091|0.9273	208|375|382|399|801|973|1274|1360|1413|1773|1813	0.9273|0.96|0.92|0.9111|0.913|0.9123|0.9123|0.9355|0.9677|0.9677|0.9434
B0273.4c	1022|1030|1186|1187|1188|1233|1520|1610|2074|2280|2344|2567|2588|2715|2790|2871|2873|2949|2950|3040	0.9|0.9091|0.9091|0.9048|0.9048|0.9|0.9|0.9048|0.9|0.9048|0.9231|0.9259|0.9355|0.913|0.9091|0.9375|0.9032|0.9355|0.9333|0.9	618|1031|1518|1788|2792|2967|2980|2988|3042	0.9|0.9048|0.9048|0.9167|0.9062|0.9375|0.931|0.9333|0.92	1463|2741|2779|2789|2908|2948|2969	0.9|0.92|0.931|0.9|0.9333|0.9333|0.9375	878|1032|1519|1789|1934|2121|2466|2546|2569|2587|2729|2780|2872|2909|2958|2959|2968|3041|3053	0.9|0.9048|0.9|0.913|0.9|0.9|0.9167|0.9286|0.913|0.9355|0.9259|0.9355|0.9375|0.9032|0.9355|0.9259|0.9355|0.9062|0.9062
B0280.10a	132|177|231|318|320|410|412|472|719|720|870|891|892|898|900|902|911|913|933|934	0.9464|0.9057|0.9123|0.9677|0.9623|0.9677|0.9|0.9057|0.9474|0.9167|0.9211|0.9143|0.9211|0.9512|0.9545|0.9487|0.9535|0.9545|0.9444|0.9333	133|267|721	0.9508|0.9057|0.9024			134|232|316|317|411|470|485|780|869|890|899|901|912	0.9508|0.9286|0.918|0.9|0.9344|0.9057|0.9074|0.9091|0.9189|0.9091|0.9535|0.9524|0.9545
B0280.1a	230|380|470|472|524|552|567|654|750|767|953|972|1089|1100	0.9216|0.9216|0.9538|0.9516|0.918|0.9062|0.9355|0.9123|0.9062|0.9394|0.9412|0.9077|0.9315|0.9184	156|339|438|655|716|721|768|951|954	0.9643|0.9184|0.9138|0.9444|0.9296|0.9104|0.9242|0.9412|0.9508	148|446|525|689|720	0.9655|0.9149|0.9167|0.9344|0.9107	73|149|150|157|160|276|469|471|526|527|551|553|566|641|656|697|722|766|955|994|1116	0.9167|0.963|0.9643|0.9298|0.9153|0.9038|0.9123|0.9552|0.9167|0.9412|0.9206|0.9322|0.9444|0.9153|0.9245|0.9412|0.9375|0.9615|0.9219|0.9254|0.9167
B0280.3.1	203|317|371|399|958|960	0.9107|0.9167|0.9286|0.9688|0.95|0.9661	228|400|486	0.9661|0.9692|0.9608	366|407|774	0.9464|0.9123|0.9016	179|199|230|367|398|401|485|487|569|775|776|959	0.9245|0.9|0.9057|0.9333|0.9423|0.9365|0.9524|0.9273|0.9184|0.9194|0.9677|0.95
B0280.5	162|238|304|352|399|432|503|528|542|543|555|645|646|838|960|1110|1246|1296|1361|1362|1392|1443|1470|1578|1647|1649	0.9016|0.9259|0.9014|0.9|0.9437|0.9565|0.9412|0.9403|0.9167|0.9054|0.9275|0.9516|0.9153|0.9759|0.9153|0.9571|0.9432|0.9789|0.9647|0.9551|0.9775|0.9688|0.9036|0.9067|0.9785|0.9419	551|709|1247|1298|1393|1444|1646	0.9459|0.9383|0.9444|0.967|0.9487|0.92|0.9759	433|502|539|550|708|840|940|991|1020|1243|1429|1441	0.9559|0.9333|0.9|0.9167|0.9518|0.9643|0.9529|0.9385|0.9146|0.9625|0.9796|0.9785	7|13|160|161|237|305|398|434|504|552|553|556|644|654|655|671|707|839|941|942|992|993|1109|1133|1248|1297|1394|1430|1431|1442|1471|1648	0.9524|0.902|0.9672|0.9524|0.9167|0.9167|0.9091|0.9296|0.9265|0.9091|0.9054|0.9254|0.9437|0.9155|0.9091|0.9286|0.9467|0.9529|0.9639|0.9398|0.9194|0.9138|0.963|0.9231|0.9545|0.978|0.9481|0.9792|0.9792|0.9785|0.9036|0.9684
B0280.8	16|49|115|146|161|196|197|200|203|292|294|372|383|507|553|583|620|862|863|936|972|1035|1103|1177|1204|1286|1288|1363|1485|1486	0.9655|0.9245|0.92|0.9184|0.931|0.9333|0.9516|0.9111|0.9091|0.9683|0.9508|0.9|0.9273|0.9667|0.9531|0.963|0.9194|0.9194|0.9394|0.9403|0.9077|0.9706|0.9429|0.9265|0.9104|0.9756|0.9057|0.9518|0.9625|0.961	13|199|201|236|293|314|333|508|581|618|934|937|1036|1179|1287|1300|1364|1487	0.931|0.9032|0.9643|0.9474|0.9697|0.9574|0.9074|0.9677|0.9194|0.9206|0.9|0.9032|0.9577|0.9067|0.974|0.9286|0.9756|0.9054	163|202|582|633|861|1152	0.9508|0.94|0.931|0.9333|0.9344|0.9333	14|15|50|162|198|279|509|512|554|632|865|938|1285|1365	0.9508|0.9508|0.9|0.9298|0.9355|0.9|0.9344|0.9153|0.9062|0.9365|0.9455|0.9143|0.9634|0.9342
B0280.9	51|243|246|247|296|297|355|367|445|482|528|562|575|579|598|600|601|763|806|937|956|1077|1088|1142|1206	0.9342|0.9512|0.9551|0.9565|0.9268|0.9221|0.9367|0.9041|0.9681|0.9195|0.9333|0.9067|0.9773|0.9059|0.9205|0.956|0.9157|0.9091|0.949|0.9221|0.9|0.939|0.9368|0.9011|0.9149	6|373|447|529|576|807|1199|1201|1236	0.9091|0.9167|0.9425|0.9101|0.975|0.9479|0.9158|0.9368|0.907	14|133|179|186|241|273|274|285|762|1140	0.9434|0.974|0.9|0.9176|0.962|0.9556|0.9655|0.9359|0.9059|0.9703	50|134|187|242|248|272|354|446|577|599|811|851|1138|1139|1200|1235	0.9104|0.9615|0.9136|0.9512|0.907|0.9655|0.9494|0.9551|0.9785|0.9263|0.9213|0.9263|0.9355|0.9583|0.9604|0.9286
B0281.5a	256|320|376|377|487|489|595|634|738|811	0.9123|0.9929|0.986|0.9681|0.9634|0.9622|0.966|0.9461|0.931|0.9525	50|203|236|321|329|331|596|737|739|748|750	0.9012|0.932|0.9046|0.9929|0.9162|0.9613|0.9841|0.9625|0.9136|0.9324|0.94	254|322	0.9561|0.9903	51|207|255|319|330|375|488|597|636|810	0.9319|0.9505|0.9785|0.9772|0.9774|0.9803|0.9663|0.9794|0.9284|0.9184
B0284.3	263|292|296|447|452|454|455|571|578|592|594|596|598	0.9028|0.9551|0.9241|0.931|0.9028|0.9691|0.9674|0.9189|0.9074|0.9362|0.9318|0.9091|0.913	298|562|577|579|580|591|593	0.9136|0.9444|0.9062|0.9531|0.9074|0.9574|0.9583	294|453	0.9195|0.9794	240|297|561	0.9398|0.9024|0.9306
B0285.1a	557|997|1053|1310|1501|1568|1672|1815|2166|2204|2219|2279	0.9|0.9048|0.9091|0.9091|0.9091|0.9091|0.9048|0.913|0.9091|0.9048|0.9|0.9167	828|1311|1416|1697|1763|2205|2208|2220|2387|2480	0.9|0.9|0.9|0.9091|0.9048|0.9091|0.9048|0.9091|0.9091|0.9048	815|983|2278	0.9091|0.9091|0.913	556|673|816|827|984|996|1447|1567|1671|1698|1761|1762|1768|1769|1813|2035|2242|2386|2481	0.9|0.9|0.913|0.9|0.9048|0.9048|0.9091|0.913|0.9|0.9091|0.9|0.9048|0.9048|0.9091|0.9|0.913|0.9048|0.9167|0.9048
B0285.3	109|111|119|171|172|211|289|306|430|444|586|671|708|709|716	0.963|0.902|0.9492|0.9492|0.931|0.9375|0.9545|0.9|0.9583|0.9571|0.9167|0.9481|0.9344|0.9091|0.9074	110|121|290|385|391|445|466|698	0.9592|0.9|0.9412|0.9016|0.9155|0.9552|0.9167|0.9032	307|431|579	0.9016|0.9265|0.9091	120|141|165|291|308|386|390|392|467|468|542|707	0.9344|0.902|0.9149|0.9403|0.9194|0.9194|0.9123|0.918|0.9342|0.9444|0.9275|0.9123
B0285.4.1	110|112|249|336|402|575|776|830|836|867|1133|1135|1142|1145|1146|1148	0.9516|0.9194|0.9138|0.918|0.95|0.9726|0.9|0.9074|0.9104|0.9298|0.9661|0.9074|0.9683|0.907|0.9661|0.9286	250|577|747|1144	0.9206|0.9577|0.9104|0.9677	96	0.9423	97|111|248|338|403|576|664|837|1128|1134|1141|1143	0.9107|0.9375|0.9153|0.9038|0.9194|0.971|0.9672|0.9538|0.9184|0.902|0.9286|0.9531
B0285.4.2	110|112|249|336|402|575|665|749|776|823|836|865|866|1133|1135|1142|1146|1148	0.9714|0.9118|0.9583|0.9722|0.9219|0.9634|0.9032|0.9571|0.918|0.9342|0.9155|0.9|0.9057|0.9365|0.9206|0.9254|0.9344|0.9333	250|337|573|577|747|1144	0.9467|0.9138|0.931|0.9753|0.9028|0.9565	96|361|662	0.9242|0.9355|0.9079	25|97|111|248|338|406|574|576|664|748|837|1000|1128|1143	0.9219|0.9077|0.961|0.9589|0.9206|0.9016|0.9118|0.9753|0.9722|0.9028|0.9296|0.9077|0.9574|0.9531
B0285.5	4|79|80|82|95|120|155|242|355|357|358|482|543|544|590|724|839|842|899|900|920|1034|1061|1070|1076|1239|1296|1364|1424|1502|1506|1562|1571|1617|1778|1895|2010|2160|2173|2175	0.925|0.963|0.9667|0.9167|0.9643|0.9149|0.9623|0.9444|0.9538|0.9286|0.9|0.9077|0.9531|0.9706|0.9104|0.9333|0.9048|0.9|0.9524|0.918|0.9589|0.9286|0.9032|0.9333|0.9531|0.9565|0.9275|0.9545|0.9242|0.9265|0.9367|0.9595|0.9481|0.9333|0.9315|0.9625|0.9474|0.9726|0.971|0.9688	5|81|156|252|363|551|591|675|738|740|864|866|921|1471|1496|1563|1785|1790|1881|1896|1995|2066	0.9388|0.9355|0.9492|0.9074|0.9038|0.9111|0.9492|0.9091|0.9016|0.9194|0.9688|0.9|0.9545|0.9403|0.9254|0.9385|0.913|0.9324|0.9091|0.9067|0.92|0.9054	78|550|722|872|898|1131|1388|1619|1837|1894|1922|1997	0.9348|0.9|0.9286|0.9365|0.9701|0.9273|0.9559|0.9351|0.9481|0.9375|0.9577|0.975	6|118|124|157|184|185|244|354|356|480|481|542|592|676|739|841|865|873|874|903|922|1071|1132|1133|1213|1241|1504|1505|1564|1618|1786|1789|1879|1921|1996|2009|2159|2174	0.9048|0.94|0.9492|0.9483|0.9661|0.9138|0.9057|0.9531|0.9545|0.9412|0.9403|0.9677|0.9492|0.9259|0.9403|0.9365|0.9219|0.95|0.9672|0.9016|0.9516|0.918|0.9538|0.9524|0.9016|0.9394|0.961|0.9494|0.9508|0.9474|0.9|0.9351|0.9091|0.913|0.95|0.9286|0.9565|0.9706
B0285.7	220|221|275|276|313|346|438|512|514|657|871|969|973|1009|1161|1453|1474|1545|1546|1557|1562|1599|1601|1675|1698|1726|1771|1782|1800|1815|2032|2045|2184|2212|2230|2245|2246|2506|2507|2534|2638|2853	0.9333|0.9718|0.9589|0.9867|0.935|0.9429|0.9389|0.9028|0.9338|0.9375|0.9|0.904|0.9172|0.9116|0.9084|0.9021|0.9714|0.9021|0.9634|0.9077|0.9661|0.9799|0.9583|0.904|0.9184|0.9211|0.9243|0.9074|0.9512|0.9707|0.9091|0.9153|0.9686|0.9856|0.9557|0.9223|0.9692|0.9309|0.9609|0.9234|0.9059|0.9554	222|277|294|598|709|970|971|1243|1352|1476|1563|1666|1728|1797|1801|2089|2213|2231|2247|2445|2447|2508|2524|2532|2811|2837	0.9559|0.9624|0.9259|0.9037|0.9444|0.9693|0.9704|0.9262|0.9231|0.9783|0.9769|0.9006|0.943|0.903|0.9116|0.911|0.9578|0.936|0.9534|0.9351|0.901|0.9738|0.9036|0.9657|0.9551|0.9062	390|398|513|655|952|972|1487|1814|2031|2836	0.9203|0.9394|0.9467|0.9695|0.9643|0.9799|0.9647|0.9805|0.9317|0.9032	347|391|656|710|887|953|954|1286|1353|1475|1486|1564|1598|1600|1727|1773|1816|2033|2047|2090|2183|2186|2214|2232|2444|2533|2634	0.9098|0.9389|0.974|0.9669|0.9262|0.9571|0.9497|0.906|0.9187|0.9779|0.902|0.9524|0.9602|0.9801|0.935|0.9545|0.9324|0.9027|0.97|0.9323|0.9062|0.9639|0.9299|0.9399|0.9105|0.9624|0.9071
B0285.9.1	174|257|296|456|481|580|581|604|754|778|871|965|967|1129|1243|1288	0.9286|0.9231|0.9|0.9048|0.9524|0.9302|0.9286|0.9032|0.9211|0.907|0.9268|0.9024|0.95|0.9143|0.9459|0.9259	258|308|483|1127|1268|1270|1289	0.9189|0.95|0.9|0.9286|0.9032|0.9032|0.9259	182|320	0.9211|0.9167	183|184|256|309|454|455|457|458|482|643|682|779|1269|1290	0.9118|0.9118|0.9167|0.9512|0.925|0.9024|0.9231|0.9|0.9545|0.9444|0.9189|0.9|0.9062|0.9231
B0286.1.2	232|361|480|482|589|613|742|843	0.9048|0.9048|0.92|0.92|0.9231|0.9167|0.92|0.9231	614|817	0.92|0.9231	283|356|712|872	0.9048|0.9|0.9259|0.9167	282|360|453|588|590|615|713|741|744|816|920	0.913|0.913|0.9259|0.9231|0.9231|0.9048|0.9167|0.9167|0.913|0.9259|0.9048
B0286.4a.1	283|318|343|601|734|898|976|1018|1075|1196|1287|1291|1313|1373|1419|1581|1623|1624|1671|1672|1683|1684|1686|1687|1689	0.9515|0.9385|0.9254|0.9379|0.9647|0.9114|0.9021|0.9429|0.962|0.9209|0.956|0.9591|0.9408|0.9128|0.9785|0.954|0.9624|0.973|0.9362|0.9419|0.9286|0.9349|0.9586|0.9747|0.985	281|627|1073|1094|1197|1289|1493|1583|1599|1625|1690|1810	0.9828|0.975|0.924|0.9|0.9068|0.9581|0.9048|0.9034|0.9059|0.9735|0.9786|0.9264	282|315|376|537|628|735|755|768|885|1418|1425|1564|1565|1670	0.9831|0.9355|0.9189|0.9202|0.9685|0.9455|0.9408|0.9091|0.9351|0.9497|0.9286|0.929|0.929|0.9407	284|339|473|477|736|766|886|900|1074|1286|1290|1420|1494|1582|1600|1685|1688|1691|1829	0.9725|0.9387|0.9333|0.9529|0.9448|0.9286|0.976|0.9364|0.9595|0.9231|0.9123|0.9441|0.9337|0.9371|0.9081|0.9503|0.9691|0.984|0.9068
B0286.4a.2	317|734|1007|1058|1135|1211|1339|1402|1403|1405	0.92|0.931|0.9032|0.9231|0.931|0.9062|0.9032|0.9355|0.9394|0.9091	60|343|810|1209|1406	0.913|0.9091|0.92|0.9333|0.9375	56	0.9167	55|189|482|485|602|616|1210|1313|1401|1404|1407	0.9231|0.913|0.9259|0.9259|0.9259|0.9259|0.9355|0.92|0.9143|0.9032|0.9394
B0286.4b	63|601|753|1028|1085|1086|1134|1148|1149|1151	0.9|0.9|0.9231|0.9091|0.9231|0.92|0.92|0.9167|0.931|0.9286	751|1152	0.9091|0.9259	347|384|660|880|1027	0.9048|0.9091|0.9091|0.9259|0.9091	79|348|362|1062|1150	0.9167|0.9167|0.913|0.9231|0.9286
B0286.4c.1	277|587|595|597|747|938|1150|1236|1282|1486|1487|1546|1549|1550|1552	0.9091|0.9286|0.9184|0.94|0.92|0.9074|0.9434|0.9123|0.9333|0.963|0.9474|0.9184|0.9412|0.9667|0.9667	936|1488|1553	0.9038|0.9492|0.9661	370|531|598|631|748|1281|1288	0.9348|0.9333|0.9535|0.9362|0.9388|0.9216|0.9318	278|333|371|485|596|599|749|763|1149|1237|1357|1463|1548|1551|1554	0.9118|0.9231|0.9375|0.9211|0.9149|0.9318|0.9412|0.94|0.9259|0.9074|0.9184|0.9273|0.9107|0.9655|0.9667
B0286.4c.3	1049|1155	0.9|0.9
B0286.4c.4	845|936|962|1068|1272|1273|1321|1336	0.913|0.9|0.9167|0.92|0.913|0.913|0.913|0.9231	1274|1339	0.913|0.913	1067	0.913	549|723|1023|1069|1337	0.9|0.9|0.9048|0.9091|0.92
B0302.1a	145|147|276|301|340|595|1083|1117|1225|1321|1596|1603|1668|1669|1974|1986|2013|2317|2600|2602|2639|2718|2720|2752|2894|2977|3182|3184|3507|3526|3556|3688|3860|3971|3972	0.9048|0.9|0.9231|0.9286|0.9167|0.931|0.9259|0.9412|0.9231|0.9333|0.9375|0.9|0.9118|0.9394|0.9091|0.9032|0.9231|0.9118|0.9091|0.9429|0.9474|0.9535|0.9444|0.9512|0.9512|0.925|0.9211|0.9429|0.9318|0.925|0.9231|0.9111|0.9211|0.9211|0.925	596|666|667|820|1033|1084|1118|1137|1181|1767|1987|1989|2067|3183|3266|3396|3508|3530|3720|4002	0.931|0.92|0.9048|0.913|0.931|0.9286|0.9375|0.9355|0.9062|0.9062|0.9429|0.9091|0.9|0.9302|0.9143|0.9545|0.9048|0.9118|0.9091|0.9143	274|1065|1309|1426|1667|1924|1972|2652|2716|2753|3529	0.9286|0.9|0.9394|0.9091|0.9032|0.9032|0.931|0.9487|0.9412|0.9474|0.9091	300|341|459|471|597|1119|1136|1182|1310|1311|1322|1427|1604|1766|1779|1922|1923|1973|1988|2065|2360|2361|2651|2717|2719|2739|2754|2895|2976|2978|3395|3464|3525|3528|3555|3687|3721|3858|4003	0.9167|0.913|0.9|0.9|0.9286|0.9333|0.9394|0.9|0.9394|0.9412|0.92|0.9062|0.9032|0.9062|0.913|0.9062|0.9333|0.9394|0.9091|0.9118|0.9143|0.9167|0.9286|0.9535|0.9535|0.9189|0.9444|0.925|0.9048|0.9286|0.925|0.907|0.925|0.9091|0.9429|0.9111|0.925|0.9189|0.9167
B0302.5	65|115	0.9091|0.9	203	0.913	202|204	0.913|0.9091	64|630	0.913|0.9091
B0303.14	244|245|659|702|911|983|1073|1084|1178|1436|1437|1507	0.9|0.9|0.9091|0.9048|0.913|0.9091|0.9032|0.9|0.9032|0.9091|0.9355|0.9048	661|733|1074|1078	0.913|0.913|0.9355|0.9	730|1422	0.9|0.9091	660|731|734|1075|1301|1423	0.9091|0.9091|0.913|0.9375|0.9259|0.9355
B0303.15	31|33|146|319|448|464|485|510|522|524|572|574|627	0.9386|0.9533|0.9182|0.9213|0.9055|0.9032|0.9302|0.9845|0.9231|0.9559|0.9697|0.9722|0.9429	147|321|447|465|509|541|575|623	0.9224|0.9302|0.9083|0.907|0.9483|0.9018|0.9612|0.9468	20|269|405|554|622	0.9167|0.9068|0.922|0.9008|0.9535	32|270|320|337|386|388|406|446|484|511|523|535|573|576	0.972|0.9055|0.976|0.9091|0.9231|0.9083|0.9037|0.9516|0.9225|0.9852|0.9141|0.9216|0.9708|0.935
B0303.2.1	42|87|88|197|199|425|556|558|621|682|694|726	0.9355|0.9091|0.92|0.9|0.9167|0.92|0.9259|0.931|0.9375|0.9062|0.9062|0.9333	40|64|208|223|604|622|695|787	0.9355|0.9259|0.9|0.9375|0.9167|0.9333|0.9375|0.9	144	0.9259	35|41|222|426|492|557|623|678|696|706|725|744	0.9|0.9375|0.9333|0.92|0.9167|0.9286|0.9333|0.92|0.9375|0.9231|0.9259|0.9231
B0303.3.1	24|35|112|185|205|276|292|293|324|448|511|523|603|620|727|748|752|753|754|805|807|837|865|883|944|945|1036|1038|1066|1085|1097|1150|1178|1228|1286|1288|1300|1366|1405|1416|1629	0.9448|0.9205|0.9532|0.9357|0.9548|0.9415|0.99|0.9898|0.9235|0.9358|0.9136|0.9341|0.9162|0.9081|0.9091|0.949|0.9213|0.95|0.9213|0.9187|0.9295|0.9152|0.9101|0.9152|0.9282|0.9378|0.9718|0.9615|0.9379|0.9244|0.9365|0.9227|0.9409|0.9339|0.934|0.9179|0.96|0.9602|0.9751|0.9709|0.9508	25|113|320|446|449|728|835|1067|1299|1325|1417|1568	0.9015|0.9404|0.9071|0.9427|0.913|0.9048|0.9299|0.9348|0.9765|0.9|0.9652|0.903	295|697|866|932|943|1037|1094|1098|1149|1301	0.9313|0.9195|0.962|0.9421|0.9219|0.9716|0.9026|0.9436|0.9116|0.9115	114|204|206|291|294|323|447|450|534|535|621|698|699|729|804|806|836|867|934|1035|1062|1068|1076|1095|1096|1179|1206|1207|1287|1298|1326|1327|1367|1400|1404|1415	0.9688|0.927|0.9146|0.9852|0.9085|0.9243|0.9583|0.9412|0.9669|0.9615|0.9244|0.962|0.9578|0.906|0.9345|0.9844|0.9112|0.9454|0.955|0.907|0.9511|0.9032|0.9286|0.915|0.9679|0.9086|0.9289|0.932|0.9552|0.9648|0.9391|0.9372|0.9353|0.9157|0.9|0.9602
B0303.3.2	4|15|92|164|165|185|256|272|273|304|428|487|491|503|600|707|728|732|733|734|785|787|788|817|863|924|925|1016|1018|1046|1065|1077|1130|1132|1158|1266|1268|1280|1346|1385|1396|1609	0.9683|0.9552|0.9801|0.9126|0.9344|0.929|0.9355|0.9773|0.9884|0.9299|0.9412|0.9174|0.9205|0.9471|0.9141|0.9211|0.9086|0.9481|0.9617|0.9193|0.9236|0.9257|0.9137|0.9235|0.9013|0.9086|0.908|0.9794|0.9731|0.9351|0.9085|0.9441|0.9693|0.9085|0.9053|0.9251|0.9167|0.9624|0.95|0.9586|0.9827|0.9346	5|93|276|300|426|429|431|815|1279|1305|1397|1548	0.9286|0.9248|0.927|0.9286|0.95|0.913|0.9123|0.9304|0.9845|0.9042|0.9595|0.9339	14|275|456|677|846|912|923|958|1017|1078|1129|1281	0.947|0.9257|0.9021|0.9362|0.9253|0.9618|0.9257|0.9273|0.9842|0.9467|0.9042|0.9118	6|94|184|186|271|274|303|368|427|430|514|515|599|601|678|679|784|786|816|847|913|914|1015|1042|1048|1056|1076|1186|1187|1267|1278|1306|1307|1318|1347|1357|1380|1395|1593	0.9107|0.9301|0.9257|0.9306|0.9774|0.9392|0.9551|0.9037|0.9518|0.9573|0.9636|0.9756|0.9006|0.929|0.9603|0.9437|0.9433|0.9834|0.9437|0.9138|0.9182|0.9409|0.9563|0.9571|0.9|0.9281|0.9371|0.9318|0.9505|0.9471|0.9834|0.9611|0.9314|0.9096|0.92|0.9205|0.9456|0.9322|0.9029
B0303.4.1	222|280|378|415|604|655|752|827|875|887|893|899|911|921|932|933|936|938|939|953|956|984|987|1017|1034|1046|1144|1211|1221|1323|1327|1348|1413|1487|1523|1541|1703|1706|1709|1773|1802|1928|2090|2091|2100|2102|2107|2112|2113|2243|2245	0.94|0.9464|0.9592|0.92|0.9623|0.9167|0.931|0.95|0.9492|0.931|0.9153|0.9362|0.9286|0.9153|0.918|0.9322|0.9153|0.9545|0.9531|0.9016|0.9492|0.9697|0.9375|0.9516|0.9153|0.9385|0.9692|0.9|0.9219|0.9365|0.9032|0.9104|0.9344|0.9559|0.9583|0.9385|0.9016|0.9595|0.9275|0.9559|0.9167|0.975|0.942|0.961|0.9385|0.9595|0.9298|0.9245|0.9104|0.9577|0.9437	192|513|605|616|702|753|825|888|909|954|1047|1145|1488|1586|1704|1707|1929|2108	0.9231|0.9091|0.9184|0.9388|0.9636|0.9123|0.9333|0.9245|0.9412|0.9231|0.9167|0.9492|0.9167|0.9429|0.9028|0.9722|0.975|0.9	747|748|749|891|897|1414|1466|1522|1892|1930|2092|2101	0.913|0.9259|0.9655|0.9167|0.9444|0.9394|0.9375|0.9077|0.9016|0.975|0.9615|0.9467	282|351|670|703|750|751|826|871|892|898|910|922|955|985|986|1033|1048|1182|1219|1328|1415|1524|1650|1708|1711|1756|1757|1774|1893|1894|2014|2093|2103|2109|2111|2114|2134|2244	0.9074|0.9302|0.9|0.9074|0.9245|0.95|0.9683|0.9153|0.918|0.9636|0.9412|0.9344|0.942|0.971|0.9706|0.9032|0.9016|0.9344|0.9322|0.9231|0.9524|0.9577|0.9375|0.9722|0.9|0.9565|0.9552|0.9167|0.9508|0.931|0.9107|0.9062|0.9014|0.9559|0.9429|0.9559|0.963|0.942
B0303.4.2	840|841|846|847|864|895|925|942|954|1279|1300|1395|1617|1681|1835|1836|1999|2010|2151|2153	0.9|0.9|0.9048|0.9091|0.9048|0.9048|0.9048|0.9048|0.9091|0.9048|0.913|0.9333|0.9333|0.9091|0.9231|0.9429|0.9091|0.9091|0.9333|0.9375	817|862|1494|1837|2016|2099	0.9|0.9091|0.9286|0.9429|0.9259|0.9	1322|1374|1838|2000|2009	0.92|0.9259|0.9429|0.9118|0.9062	818|863|893|894|941|1042|1323|1450|1529|1664|1682|2011|2017|2152	0.9|0.913|0.9167|0.913|0.9091|0.9091|0.92|0.9118|0.9259|0.9286|0.9286|0.9|0.9394|0.9355
B0303.7b	112|247|382|425|538|651|792|793|1042|1128|1336|1449|1450|1617	0.9|0.9474|0.9|0.9|0.9211|0.9118|0.9143|0.9118|0.9211|0.9091|0.9556|0.9394|0.9375|0.9286	282|304|347	0.9024|0.9143|0.9429	560|910|1335	0.9231|0.9512|0.9512	76|407|408|426|466|539|561|653|722|791|1337|1364|1418|1619	0.9091|0.9143|0.9429|0.9211|0.9231|0.9189|0.9048|0.9189|0.9118|0.9189|0.9565|0.9024|0.9024|0.9143
B0303.8	323|364|365|465|568	0.9286|0.9259|0.9333|0.931|0.9	366|423|466|591	0.9|0.9|0.9167|0.9			204	0.9231
B0303.9	91|529|715|728|870|941|1082|1194|1256|1424|1781|1784|1976	0.9091|0.9|0.9091|0.9167|0.9167|0.9286|0.92|0.913|0.9167|0.9091|0.92|0.92|0.9048	942|1171|1212|1257|1469|1501|1782|1869	0.9231|0.9048|0.9048|0.913|0.9091|0.9|0.9259|0.9231	18|663|716|1547|1668	0.9|0.9|0.9|0.9259|0.9231	664|727|943|1027|1054|1195|1470|1546|1763|1870	0.9048|0.913|0.9259|0.92|0.9|0.913|0.9091|0.9|0.9|0.9167
B0304.1a	446|563|707|1002	0.9048|0.9048|0.9|0.9048	738|1003	0.9048|0.9048	249|468|560|829|843|916	0.9|0.9091|0.9048|0.9091|0.913|0.9	248|561|562|739|830|844|845	0.9|0.9091|0.913|0.9091|0.9048|0.913|0.913
B0304.1c.1	101|222|247|444|446|467|533|575|595|716|749|854|951|1036|1054|1056|1135	0.9535|0.9524|0.9268|0.9111|0.95|0.9167|0.925|0.9268|0.9318|0.9|0.9302|0.925|0.9184|0.9423|0.9583|0.9565|0.9259	103|201|454|693|750|834|1037|1134	0.9111|0.9118|0.9024|0.9189|0.9302|0.9|0.9091|0.9	221|245|249|468|532|572|841|855|950	0.9167|0.9189|0.9524|0.9574|0.9302|0.9348|0.907|0.9615|0.9412	102|136|248|469|537|573|574|633|751|856|857|1053|1055	0.9318|0.9143|0.9268|0.9574|0.9286|0.94|0.96|0.9111|0.9535|0.9615|0.9608|0.9487|0.9556
B0304.1c.2	470|510|530|684|775|991	0.9091|0.9091|0.9091|0.9|0.9048|0.9048	628|685|779	0.9|0.9048|0.92	467|507|776|790	0.9|0.913|0.913|0.9167	499|508|509|531|592|777|780|791|792|810|937	0.9048|0.9167|0.9167|0.9048|0.9|0.92|0.913|0.9167|0.9167|0.9|0.9048
B0304.2	81|174|182|186|187|245|307|310|370|625|750	0.9245|0.9091|0.9259|0.9636|0.9672|0.9333|0.9091|0.9355|0.92|0.9074|0.9259	188|289|311|364|365|374|663	0.9667|0.9508|0.9455|0.9074|0.931|0.9661|0.9206	51|175|189|308|366|373	0.9286|0.94|0.9524|0.9508|0.9091|0.9516	52|176|184|290|291|309|372|413|454|624|664	0.9318|0.9167|0.9245|0.9298|0.9322|0.9516|0.9683|0.92|0.9038|0.9623|0.9016
B0304.3	304|335|507|576|716|817|863|887|983|1087|1088|1089|1370|1387	0.913|0.9|0.9091|0.9|0.9048|0.9167|0.9231|0.9167|0.9259|0.9231|0.9091|0.9231|0.9231|0.9	305|577|818|984|1371|1494|1495|1602	0.9048|0.9048|0.913|0.9231|0.913|0.92|0.9167|0.9167	1511	0.9231	303|862|864|889|964|982|985|1314|1372|1386|1427|1512	0.9048|0.9231|0.92|0.9|0.9167|0.92|0.92|0.9167|0.913|0.9048|0.9048|0.9259
B0304.4	110|299|300|312|426|427	0.913|0.9355|0.9286|0.9231|0.9259|0.9259	156	0.9048	298	0.9231	111|157|204	0.9231|0.9167|0.913
B0310.2b	6|26|27|164|174|176|259|300|537|701|874|875|1094	0.9048|0.9412|0.9394|0.9|0.9|0.9167|0.925|0.9487|0.9118|0.9459|0.9268|0.9231|0.9189	28|177|302|323|324|392|559|702|825|1248|1314	0.9394|0.9355|0.9487|0.9167|0.9|0.9459|0.9231|0.9375|0.9|0.9487|0.9444	91|247|391|506	0.9|0.9167|0.9167|0.92	99|178|190|246|260|301|339|390|703|876|1247	0.9394|0.9062|0.9032|0.9032|0.9444|0.95|0.9394|0.9118|0.9032|0.9487|0.9189
B0310.5a	270|313|1112|1113|1280|1368|1369|1461|1479|1667	0.92|0.9167|0.9394|0.9412|0.9412|0.9167|0.9118|0.9118|0.9429|0.9062	271|312|967	0.92|0.9231|0.9167	311	0.9231	302|458|950|968|1114|1281|1480|1686	0.9231|0.913|0.9|0.9231|0.9355|0.931|0.9355|0.9412
B0331.1	165|218|219|234|551|596|598|733|814|913|1034|1036|1037|1051|1171|1264|1375|1377|1440	0.9167|0.9167|0.9167|0.9259|0.9333|0.9412|0.9429|0.9375|0.9062|0.9|0.9444|0.9375|0.9062|0.9062|0.9189|0.9143|0.9487|0.9487|0.9118	442|552|595|599|1004|1052|1119|1172|1373	0.9167|0.9355|0.9286|0.9032|0.9062|0.9167|0.9062|0.9032|0.9429	217|731	0.9091|0.9375	164|264|553|597|600|732|1032|1033|1035|1053|1118|1170|1263|1374|1376	0.9167|0.9167|0.9333|0.9412|0.9|0.9394|0.9412|0.9412|0.9444|0.9118|0.9143|0.9394|0.9143|0.9474|0.9487
B0334.1.1	203|425|434	0.9|0.9048|0.9	108|398|510	0.9|0.9|0.9091	348	0.9091	422	0.9048
B0334.11a	8|127|273|317|318|333|412|658|992|1000|1001|1081|1278|1279|1287|1293|1354|1560|1561	0.9167|0.9231|0.9231|0.9167|0.9259|0.913|0.9091|0.9167|0.913|0.9|0.9032|0.931|0.9091|0.9259|0.9286|0.9|0.9231|0.9231|0.92	9|274|1002|1071|1242|1288	0.913|0.9286|0.9032|0.9333|0.9167|0.9333	1559	0.9167	10|126|128|254|275|644|990|1072|1082|1250|1277|1289|1364	0.913|0.92|0.9231|0.9231|0.931|0.9231|0.9286|0.9|0.9375|0.9259|0.92|0.9286|0.9333
B0334.11b	120|122|304|305|976|1004|1026|1057|1068|1266	0.913|0.9091|0.9091|0.913|0.9048|0.9048|0.9091|0.9091|0.9048|0.9	978|1005	0.9|0.9048			118|119|121|241|262|977|1027|1059|1069|1237|1281|1393	0.9091|0.913|0.913|0.9091|0.913|0.9091|0.9|0.9048|0.913|0.9091|0.9048|0.9
B0334.13	37|147|164|242|281|310|369	0.9048|0.9048|0.92|0.9|0.9091|0.9|0.9048	38|165	0.9091|0.92	243	0.9167	39|166	0.9048|0.92
B0334.15	10|11|209|304|307|356|375|462	0.9747|0.9767|0.9348|0.9694|0.9388|0.932|0.9024|0.9079			305|364	0.914|0.9062	306|403	0.9717|0.9109
B0334.3a.1	453|454|602|603|705|725|790|800|832|861|1030|1051|1099|1133|1302|1341|1353|1514|1731|1733|1872|1893|1927|1948|1982|2064	0.9091|0.9375|0.9672|0.9667|0.9298|0.9038|0.902|0.9688|0.9057|0.9107|0.9231|0.9016|0.9153|0.9355|0.9184|0.9545|0.971|0.9636|0.96|0.9714|0.9444|0.942|0.9091|0.9123|0.9138|0.9512	78|135|202|604|726|1354|1732|1816	0.9032|0.9024|0.9062|0.9333|0.913|0.9538|0.9583|0.9571	149|280|452|730|802|1029|1509|1515|1516|1815	0.9231|0.9107|0.907|0.9259|0.9524|0.9|0.9074|0.9706|0.9385|0.9722	281|359|360|473|474|704|706|731|732|801|1050|1094|1098|1107|1280|1340|1342|1352|1355|1424|1659|1730|1814|1871|1873|2063	0.9057|0.9423|0.92|0.9574|0.9074|0.9474|0.931|0.9464|0.9231|0.9524|0.9032|0.9375|0.9138|0.9062|0.9206|0.9344|0.9706|0.9062|0.9077|0.9077|0.9219|0.9296|0.9577|0.9714|0.9385|0.9487
B0334.3a.2	203|526|527|649|724|814|815|975|1023|1265|1268|1277|1438|1536|1584|1655|1657|1905|1906|1988	0.9|0.931|0.931|0.9259|0.9375|0.9333|0.9032|0.9032|0.9032|0.9118|0.9|0.9167|0.9474|0.9032|0.9211|0.9545|0.9302|0.9|0.9032|0.9	528|1278|1656|1732|1740	0.9259|0.9429|0.9286|0.95|0.9111	204|282|654|726|953|1160|1439|1440|1739	0.9|0.9048|0.92|0.9333|0.9048|0.9|0.9524|0.925|0.9556	205|220|628|655|656|725|1058|1266|1279|1583|1654|1738|1795|1987	0.9048|0.9|0.9231|0.9167|0.913|0.9355|0.931|0.9412|0.9412|0.9459|0.9474|0.9333|0.95|0.9286
B0334.3b	580|591|600|675|736|766|926|974|1008|1099|1216|1228|1333|1606|1608|1747|1768|1856|1939	0.9375|0.913|0.9091|0.9459|0.9412|0.9062|0.9062|0.9429|0.9062|0.9032|0.925|0.9268|0.9143|0.9512|0.9268|0.9302|0.925|0.9091|0.9167	173|339|479|601|1604|1607|1681|1691	0.9167|0.931|0.9062|0.9062|0.9118|0.9487|0.9062|0.9318	677|1364|1390|1690	0.9143|0.9|0.9|0.9348	235|348|349|579|581|602|606|607|676|973|1175|1215|1217|1230|1405|1605|1682|1689|1746|1748|1928	0.9167|0.9|0.9|0.9394|0.9429|0.9091|0.9375|0.9286|0.9189|0.9375|0.9118|0.9189|0.9024|0.9024|0.9|0.95|0.9189|0.9545|0.9535|0.9189|0.9167
B0334.4	12|16|58|84|124|260|262|274|276|277|278|290|370|414|452|507|522|523|529|530|631|632|637|643	0.9696|0.9023|0.9714|0.9552|0.969|0.9726|0.9037|0.9863|0.9762|0.9367|0.9683|0.9328|0.937|0.941|0.9558|0.9717|0.9336|0.9251|0.9355|0.9406|0.9458|0.9542|0.9259|0.9685	13|59|125|192|275|341|475|526|638|645	0.9611|0.977|0.9676|0.9303|0.958|0.9555|0.9219|0.9699|0.9505|0.9903	525	0.9383	14|60|85|126|173|261|273|342|415|477|506|521|528|633|639|644	0.9855|0.9808|0.9663|0.9703|0.9064|0.9496|0.9191|0.9324|0.9545|0.9392|0.9202|0.9336|0.9495|0.9027|0.9366|0.9641
B0334.5	6|17|67|77|183|351|352|353|373|392|442|734|842|843|964|1009|1081|1396	0.9231|0.9333|0.9403|0.9231|0.9242|0.9412|0.9275|0.9077|0.9538|0.9194|0.9016|0.971|0.9375|0.9559|0.9483|0.9167|0.9639|0.9057	374|735|965|1109|1293|1295|1299|1315|1316|1337	0.9365|0.9722|0.9107|0.9219|0.9524|0.9057|0.9074|0.9032|0.9219|0.9385	7|66|104|181|191|361|501|1294|1317|1318|1336|1338|1339|1340|1341	0.9111|0.9394|0.9118|0.9437|0.9032|0.9344|0.9437|0.9123|0.9524|0.9091|0.9062|0.9394|0.9394|0.9403|0.9167	8|182|362|502|676|733|1008|1023|1082|1165|1205|1397	0.9245|0.9265|0.9216|0.9143|0.9048|0.9298|0.9178|0.9167|0.95|0.913|0.9|0.9245
B0334.6	61|180|181|185|717|1044|1337	0.9|0.9048|0.9091|0.9|0.913|0.9091|0.9048	62|182|722|979|1087	0.9|0.9048|0.9|0.9|0.9048	224	0.9	63|281|481|798|1353	0.9048|0.9048|0.9|0.9|0.9
B0334.8a	20|115|269|272|338|340|375|529|533|564|604|761|762|843|925|1190|1192|1598|1638|1677|1775|1810|1830|1855|1931|2187|2188|2212|2357|2405|2419|2475|2488|2592|2686|2734|2773|2783|2952|2953|2955|2961|2976|3120|3195|3268|3323|3382|3423|3465|3722|3736|3738	0.92|0.9048|0.9259|0.9091|0.913|0.913|0.92|0.9048|0.9167|0.9048|0.9091|0.9091|0.9048|0.9231|0.9231|0.9167|0.92|0.913|0.9|0.913|0.9231|0.9231|0.913|0.913|0.9|0.9231|0.9231|0.9167|0.9231|0.9|0.9286|0.92|0.9259|0.9231|0.9091|0.92|0.9259|0.9259|0.92|0.9|0.9286|0.931|0.9259|0.931|0.92|0.9|0.9|0.9375|0.9231|0.931|0.9355|0.92|0.9167	563|793|844|926|1064|1678|1811|2465|2545|2872|2945|3121|3708	0.913|0.9231|0.9167|0.9167|0.913|0.913|0.9167|0.9|0.9333|0.9259|0.9231|0.9167|0.9167	464|760|1080|1599|1854|2473|2774|2775|2782|2974|3400	0.913|0.9091|0.9|0.9|0.92|0.92|0.9286|0.9167|0.9167|0.913|0.931	268|270|339|380|465|794|845|923|927|961|982|1191|1303|1304|1369|1774|1812|1847|1922|1930|1953|2027|2120|2421|2544|2546|2733|2946|2954|2975|2988|3122|3193|3194|3321|3381|3401|3466|3737	0.9259|0.9167|0.913|0.9048|0.913|0.9167|0.92|0.9|0.92|0.9|0.913|0.913|0.9167|0.9167|0.913|0.9231|0.913|0.9091|0.9048|0.9091|0.9091|0.9|0.913|0.9167|0.92|0.9231|0.9091|0.931|0.9|0.9259|0.9167|0.92|0.9259|0.931|0.9048|0.931|0.9259|0.931|0.92
B0336.10.1	175|306|367|418|488	0.9171|0.9177|0.9021|0.9843|0.9011			94	0.9212	209|210|416|417	0.9298|0.9139|0.9629|0.9843
B0336.10.2	304|365|416	0.9317|0.9096|0.9916			92	0.9398	93|207|208|414|415	0.9133|0.948|0.9305|0.9703|0.9861
B0336.10.3	209|273|304|365|416	0.9052|0.9054|0.9286|0.9133|0.9815			92	0.9292	93|207|208|414|415	0.9133|0.9438|0.9053|0.9514|0.9896
B0336.11b	217|218|219|356|396|546|572|917|918	0.9412|0.9143|0.9032|0.9231|0.913|0.9118|0.9118|0.931|0.9118	573|919	0.9091|0.9143	216|783|854|1053	0.9|0.9091|0.9118|0.9231	395|529|574|871|887|1163	0.9032|0.9167|0.9062|0.9032|0.931|0.9091
B0336.13	118|272|284|359|413|414|416|419|431|433|486|487|508	0.9672|0.9153|0.9797|0.9587|0.916|0.979|0.9403|0.9145|0.9863|0.9864|0.959|0.9569|0.938	146|282|285|417|430|434|490|491|499|539	0.904|0.9015|0.9297|0.9302|0.9579|0.9308|0.9559|0.9375|0.9126|0.9307	485|489	0.9421|0.928	237|273|283|286|360|412|418|432|435	0.9082|0.9016|0.9328|0.92|0.9524|0.963|0.9286|0.9797|0.9417
B0336.1a.1	60|64|120|297|322|561|574|669|822|825|862|879|880|915|1087|1146|1231|1409|1475|1542|1652|1654|1657|1819|2004|2017|2030|2032|2056|2097|2101|2111|2112|2265|2271|2273|2332|2334|2360|2391|2423|2595|2596|2637|2661|2769|2770	0.9|0.9048|0.9444|0.9429|0.9375|0.9286|0.9355|0.9189|0.9512|0.9062|0.9211|0.9211|0.9211|0.9474|0.9487|0.9032|0.9143|0.9189|0.9535|0.9302|0.9302|0.907|0.925|0.9444|0.9565|0.907|0.96|0.9623|0.9434|0.9388|0.9231|0.9268|0.9592|0.9583|0.96|0.9268|0.902|0.9|0.925|0.925|0.9024|0.9565|0.9388|0.9091|0.9211|0.913|0.9362	121|186|325|345|533|562|826|863|1292|1407|1476|1484|1543|2003|2033|2057|2099|2266|2489|2571|2573|2583|2768	0.9143|0.9032|0.913|0.9143|0.9062|0.9487|0.9429|0.9118|0.9024|0.9459|0.9524|0.9302|0.9231|0.9615|0.9623|0.9074|0.9024|0.9556|0.9167|0.92|0.9167|0.9592|0.9149	118|300|670|671|821|844|1088|1504|1656|2040|2100|2594	0.9375|0.9091|0.9143|0.9091|0.9512|0.9118|0.9|0.9189|0.9024|0.9149|0.9375|0.9333	66|119|122|299|303|304|330|343|344|560|563|575|823|827|1017|1477|1485|1651|1655|1658|1820|2002|2005|2018|2031|2034|2041|2055|2098|2102|2267|2272|2377|2390|2490|2572|2582|2636	0.9167|0.9375|0.9412|0.9459|0.9429|0.9444|0.9189|0.9211|0.9189|0.9167|0.9231|0.9167|0.95|0.931|0.9118|0.9524|0.9286|0.9|0.9268|0.925|0.9189|0.9302|0.9362|0.9348|0.902|0.9412|0.9388|0.9423|0.9167|0.94|0.9592|0.9583|0.9231|0.9487|0.9231|0.92|0.9348|0.9111
B0336.2.1	269|319|334|460|610|651|707|784|805|820|863|864|1051|1053|1054|1319|1320|1321	0.9265|0.9658|0.9204|0.9539|0.904|0.9044|0.9191|0.9696|0.9081|0.9017|0.9408|0.9131|0.9724|0.9165|0.954|0.9756|0.9355|0.9677	141|197|320|322|461|520|562|804|818|962|1039|1317	0.94|0.9304|0.9722|0.9193|0.917|0.9754|0.9216|0.9653|0.9536|0.912|0.9342|0.9733	140|561|705|926|1036	0.9175|0.9091|0.9387|0.9767|0.9374	198|268|321|332|333|521|534|560|612|706|819|927|963|1038|1040|1050|1052|1055|1276|1318	0.9579|0.9314|0.9791|0.9466|0.9199|0.9573|0.903|0.9236|0.9626|0.9454|0.9839|0.9327|0.9162|0.9398|0.9048|0.9358|0.968|0.9369|0.9161|0.961
B0336.2.2	201|528|727|915|918	0.9167|0.9211|0.9032|0.9286|0.9556	204|402|444|668|828	0.9375|0.95|0.9211|0.9459|0.9024	443|467|587|790	0.9|0.9032|0.9062|0.9474	11|76|203|214|403|588|683|827|916|919	0.92|0.9231|0.9189|0.9167|0.9524|0.9355|0.9167|0.9048|0.9211|0.9333
B0336.2.3	201|213|216|342|589|666|745|746|917|933|936|1189|1201|1203	0.9085|0.9149|0.9221|0.9532|0.961|0.9236|0.9484|0.9255|0.9206|0.9477|0.9301|0.9206|0.9759|0.9296	23|79|202|204|298|343|402|444|686|700|921|1188|1199	0.9515|0.9412|0.9608|0.913|0.9062|0.9198|0.9396|0.9266|0.9448|0.9461|0.9058|0.9322|0.9359	22|81|587|808|918	0.9192|0.9022|0.9286|0.96|0.925	80|150|203|214|215|403|416|442|494|588|701|809|920|932|934|937|1158|1200	0.952|0.9259|0.98|0.9615|0.9359|0.9344|0.9262|0.9075|0.95|0.9434|0.9626|0.9191|0.9176|0.9333|0.9405|0.9282|0.9098|0.9375
B0336.3a	58|82|157|159|238|240|250|346|382|617|754|874|909|1022|1052|1153|1155|1167|1189|1339|1340|1388|1435|1437|1445|1495|1504|1593|1603|1609|1639|1709|1711|1759|1781|1810|1832|1840|1917|1930|2006|2038|2045|2177|2179|2308|2310|2551|2604|2617|2620|2621|2622|2678|2735|2763|2764|2765|2766|2786	0.9574|0.96|0.9375|0.9149|0.9348|0.9362|0.9302|0.9565|0.9574|0.9268|0.9333|0.9412|0.9348|0.9259|0.9259|0.9464|0.9123|0.9107|0.9167|0.9412|0.9649|0.9636|0.9649|0.9231|0.95|0.9492|0.9492|0.9688|0.9672|0.9038|0.9344|0.913|0.9057|0.9516|0.9149|0.9153|0.9077|0.9|0.9692|0.9583|0.9167|0.9|0.9|0.9294|0.9753|0.978|0.9565|0.9125|0.9271|0.951|0.9462|0.9462|0.95|0.918|0.9189|0.9032|0.9412|0.931|0.9355|0.9474	59|83|158|175|717|1024|1168|1231|1232|1328|1594|1898|1940|2022|2023|2180|2306|2311|2378|2464|2605|2618|2788	0.9512|0.94|0.9574|0.9048|0.94|0.9423|0.9216|0.9434|0.9362|0.902|0.9672|0.9091|0.9194|0.9286|0.9143|0.9324|0.9529|0.9318|0.9359|0.9103|0.9158|0.96|0.9118	239|367|381|558|819|820|821|958|1012|1286|1444|1494|1602|1768|1808|1831|1838|2171|2307	0.9348|0.9189|0.9574|0.9375|0.9333|0.963|0.9615|0.9057|0.9211|0.907|0.9434|0.9344|0.9355|0.9344|0.9701|0.9032|0.9385|0.913|0.978	60|84|105|168|312|345|347|616|716|822|823|1023|1051|1154|1164|1169|1287|1386|1387|1436|1489|1490|1493|1496|1595|1604|1631|1655|1710|1761|1767|1809|1899|1929|1931|1939|1943|1944|2040|2099|2135|2178|2181|2255|2289|2290|2309|2603|2616|2619|2785|2787|2863	0.9118|0.9375|0.9474|0.9048|0.9062|0.9524|0.9189|0.9474|0.9375|0.94|0.9149|0.9074|0.9074|0.9286|0.92|0.94|0.9318|0.9434|0.9298|0.9608|0.9091|0.9167|0.9123|0.9464|0.9677|0.9677|0.9016|0.9057|0.9155|0.9057|0.9508|0.9733|0.9057|0.9315|0.9726|0.9531|0.9403|0.9365|0.9538|0.9268|0.9054|0.9512|0.9444|0.9211|0.9324|0.9178|0.9667|0.9574|0.9136|0.9604|0.9118|0.9459|0.9
B0336.4a	404|456|482|522|569|595|663|665|671|695|747|749|776|777|791|882|962|966|999|1013|1105|1223|1225|1226|1238|1307|1320|1338|1365|1424|1497|1498|1501|1520|1531|1533|1550|1553|1590|1592|1605|1606|1607|1616|1649|1650|1653|1674|1850|1870|1933|1934	0.9149|0.9268|0.9167|0.9608|0.9216|0.9464|0.9655|0.9184|0.9348|0.9216|0.9483|0.9661|0.9111|0.9623|0.9615|0.9|0.9412|0.94|0.9111|0.9455|0.9038|0.9153|0.931|0.9322|0.907|0.9677|0.9455|0.9091|0.9167|0.9464|0.9365|0.9667|0.9412|0.9672|0.9322|0.902|0.9153|0.9649|0.9|0.9556|0.9516|0.9273|0.9149|0.9423|0.9412|0.9216|0.92|0.9375|0.9231|0.9348|0.9268|0.9286	328|558|596|746|750|792|912|1011|1056|1224|1322|1342|1397|1500|1521|1551|1869|1935	0.9348|0.913|0.9375|0.9149|0.9412|0.9434|0.9545|0.963|0.9048|0.9344|0.9492|0.9107|0.9111|0.9444|0.9672|0.9661|0.9333|0.902	326|481|1334|1337|1341|1603|1681	0.9623|0.9574|0.9231|0.9189|0.9|0.9672|0.9111	327|405|559|568|593|594|597|662|664|748|751|793|810|883|895|961|963|976|1012|1014|1057|1104|1163|1222|1227|1237|1305|1306|1308|1321|1340|1398|1399|1402|1432|1496|1499|1502|1522|1529|1532|1552|1604|1615|1673|1675|1689|1690|1848	0.9615|0.9333|0.913|0.9149|0.9362|0.9|0.9318|0.9608|0.9655|0.9455|0.94|0.9623|0.902|0.913|0.9524|0.9|0.9184|0.9556|0.9298|0.92|0.9592|0.9286|0.9038|0.9464|0.9074|0.9038|0.9388|0.9672|0.9074|0.9672|0.931|0.9375|0.9583|0.931|0.9091|0.963|0.9474|0.9074|0.9643|0.9661|0.9259|0.9516|0.9677|0.9038|0.9565|0.9048|0.9565|0.913|0.9608
B0336.5a	47|189|206|338|431|530|554|625|641|698|699|700	0.9487|0.9512|0.907|0.9459|0.9231|0.9091|0.9|0.9545|0.9167|0.9565|0.9574|0.9512	48|339|447|531|535|583|626	0.9474|0.9474|0.9143|0.9556|0.9|0.9487|0.9524	170|231|638	0.9333|0.9091|0.9556	171|172|232|340|532|534|555|584|627|639|640	0.9111|0.925|0.9394|0.9512|0.9211|0.9211|0.907|0.9429|0.9545|0.9348|0.9348
B0336.5b	214|222|272|273|372|519|564|588|659|671|675|732|733|734	0.9231|0.925|0.9111|0.9375|0.9348|0.9259|0.9167|0.9231|0.9412|0.9|0.9302|0.9615|0.9615|0.9333	560|617|660|769|771	0.9048|0.9512|0.96|0.9388|0.9583	195|510|518|672	0.96|0.9048|0.9388|0.9464	196|197|257|374|404|448|520|559|589|618|661|673|674|768|772	0.9412|0.9412|0.9091|0.9302|0.913|0.9318|0.902|0.9302|0.92|0.9|0.9608|0.9464|0.963|0.9216|0.9574
B0336.6.1	11|124|223|231|233|248|250|252|282|284|333|347|348|432|480|485|510|641|742|744|753|887|905|916|986|1014|1015|1126|1137|1140|1162|1220|1255|1259|1278|1279|1280|1282|1305|1398|1444|1539|1540|1541|1542	0.9733|0.9286|0.9082|0.9725|0.9268|0.9159|0.9732|0.9192|0.9712|0.9551|0.9533|0.9615|0.981|0.9252|0.9192|0.9362|0.9167|0.908|0.914|0.945|0.9057|0.9348|0.914|0.9175|0.9149|0.9238|0.9368|0.93|0.9444|0.9182|0.9167|0.9048|0.9307|0.984|0.9823|0.9487|0.9381|0.9314|0.9558|0.9322|0.9714|0.9817|0.9667|0.9277|0.9146	12|283|331|334|433|486|746|853|913|1138|1141|1256|1260|1306|1399|1404|1431|1537	0.9467|0.9326|0.9429|0.9355|0.9478|0.9043|0.9072|0.9528|0.9038|0.9216|0.9238|0.9314|0.9158|0.9528|0.9369|0.9375|0.9487|0.9796	71|225|249|534|689|705|778|854|1013|1124|1405|1429	0.9429|0.9011|0.9561|0.9|0.9048|0.901|0.9565|0.9059|0.9083|0.9205|0.913|0.9208	72|73|224|232|244|251|332|346|434|457|509|622|623|681|682|752|760|779|780|855|869|914|915|982|1067|1139|1257|1258|1261|1307|1400|1403|1430|1538	0.9615|0.964|0.9022|0.9808|0.9053|0.9633|0.9423|0.9709|0.9744|0.9444|0.9406|0.9348|0.9355|0.9588|0.9596|0.9048|0.9192|0.9737|0.9569|0.9208|0.9429|0.9238|0.9259|0.901|0.9255|0.9833|0.9683|0.9756|0.9425|0.9151|0.958|0.949|0.9462|0.9703
B0336.6.2	221|240|242|323|338|348|470|734|772|976|1116|1127|1130|1249|1268|1269|1270|1295|1388|1434|1529|1530|1531|1532	0.913|0.913|0.9048|0.913|0.92|0.9091|0.9333|0.9062|0.9333|0.9062|0.9091|0.9032|0.9429|0.9429|0.9444|0.9091|0.9032|0.9429|0.9032|0.9444|0.9375|0.9375|0.9167|0.92	273|321|843|858|1131|1246|1296|1389|1527	0.9048|0.9167|0.9286|0.9231|0.9375|0.9032|0.9091|0.9355|0.9091	768|1225	0.9394|0.913	63|222|241|424|469|612|613|671|672|769|770|845|977|1057|1095|1129|1247|1248|1297|1375|1390|1391|1528	0.9048|0.913|0.913|0.9286|0.92|0.9286|0.9355|0.9|0.9118|0.9412|0.9394|0.9032|0.9032|0.9375|0.9|0.9189|0.9459|0.9167|0.9|0.9|0.9412|0.92|0.9355
B0336.7a	41|80|242|243|411|531|605|622|728|996|1103|1121|1283|1336|1337|1352|1369|1370|1525|1553	0.9091|0.9429|0.9459|0.9189|0.9118|0.9474|0.9189|0.9143|0.925|0.9118|0.9444|0.9268|0.9524|0.9487|0.9429|0.9189|0.925|0.9189|0.9|0.9091	48|207|227|821|1284	0.9|0.9118|0.9062|0.925|0.9535	1305|1306	0.9286|0.9333	15|85|94|208|244|409|410|607|653|727|1130|1175|1228|1281|1285|1335	0.92|0.9355|0.9412|0.9143|0.9062|0.9167|0.9444|0.9231|0.9189|0.95|0.9062|0.9459|0.9|0.9189|0.9535|0.9
[truncated: 10,061 more rows]

## Sheet: L1_denovo
Table S9 List of putative RNA modification sites identified with long reads.
[truncated: 9,022 more rows]

[truncated: 1 more sheets: YA_denovo]
