# Supplementary figures and images for: Direct full-length RNA sequencing reveals unexpected transcriptome complexity during Caenorhabditis elegans development
Source: HighWire-hosted journal article supplement (doi:10.1101/gr.251512.119), 2020-02-01

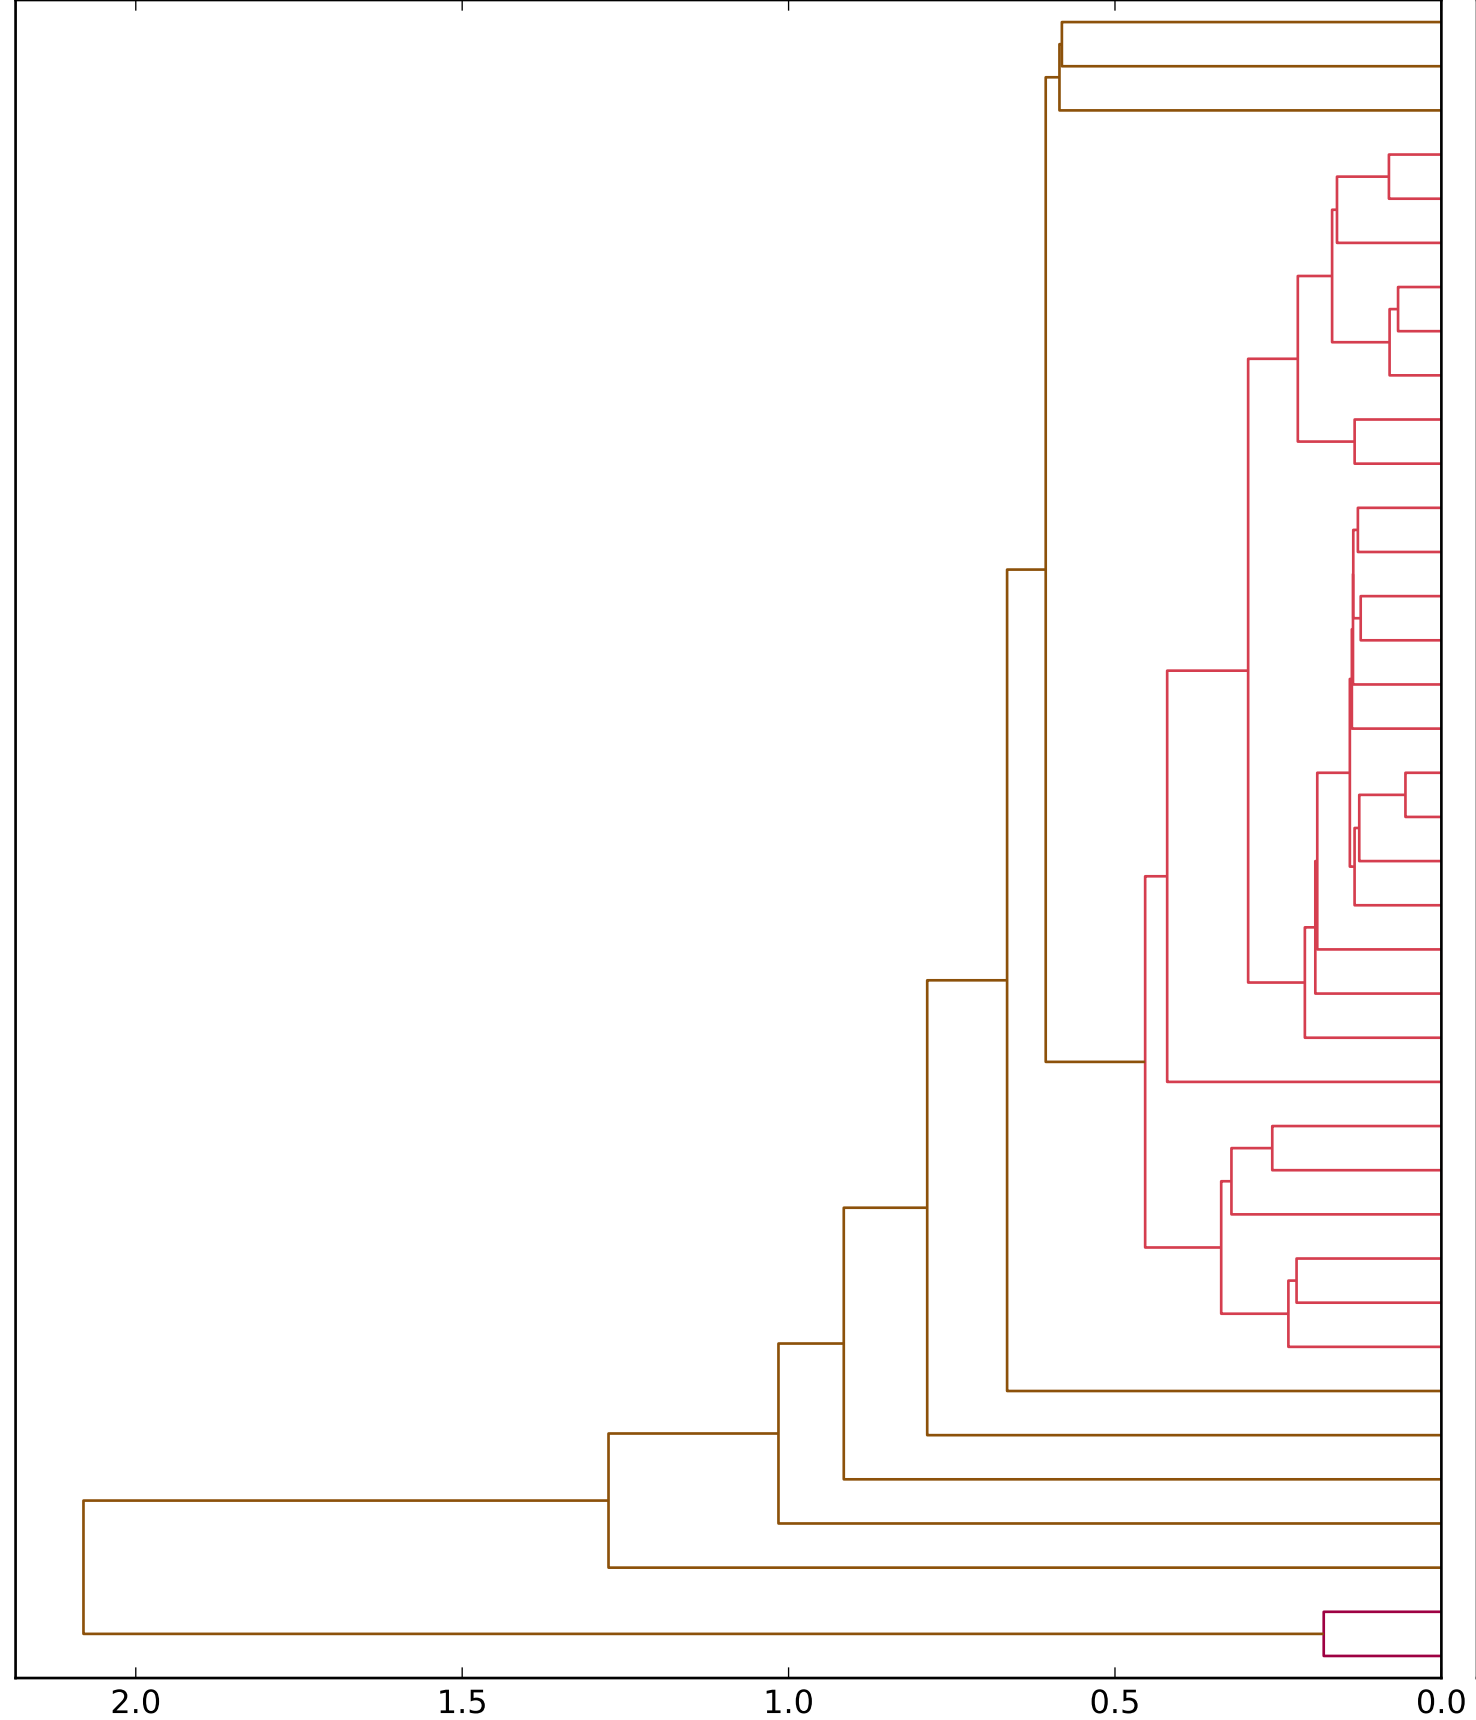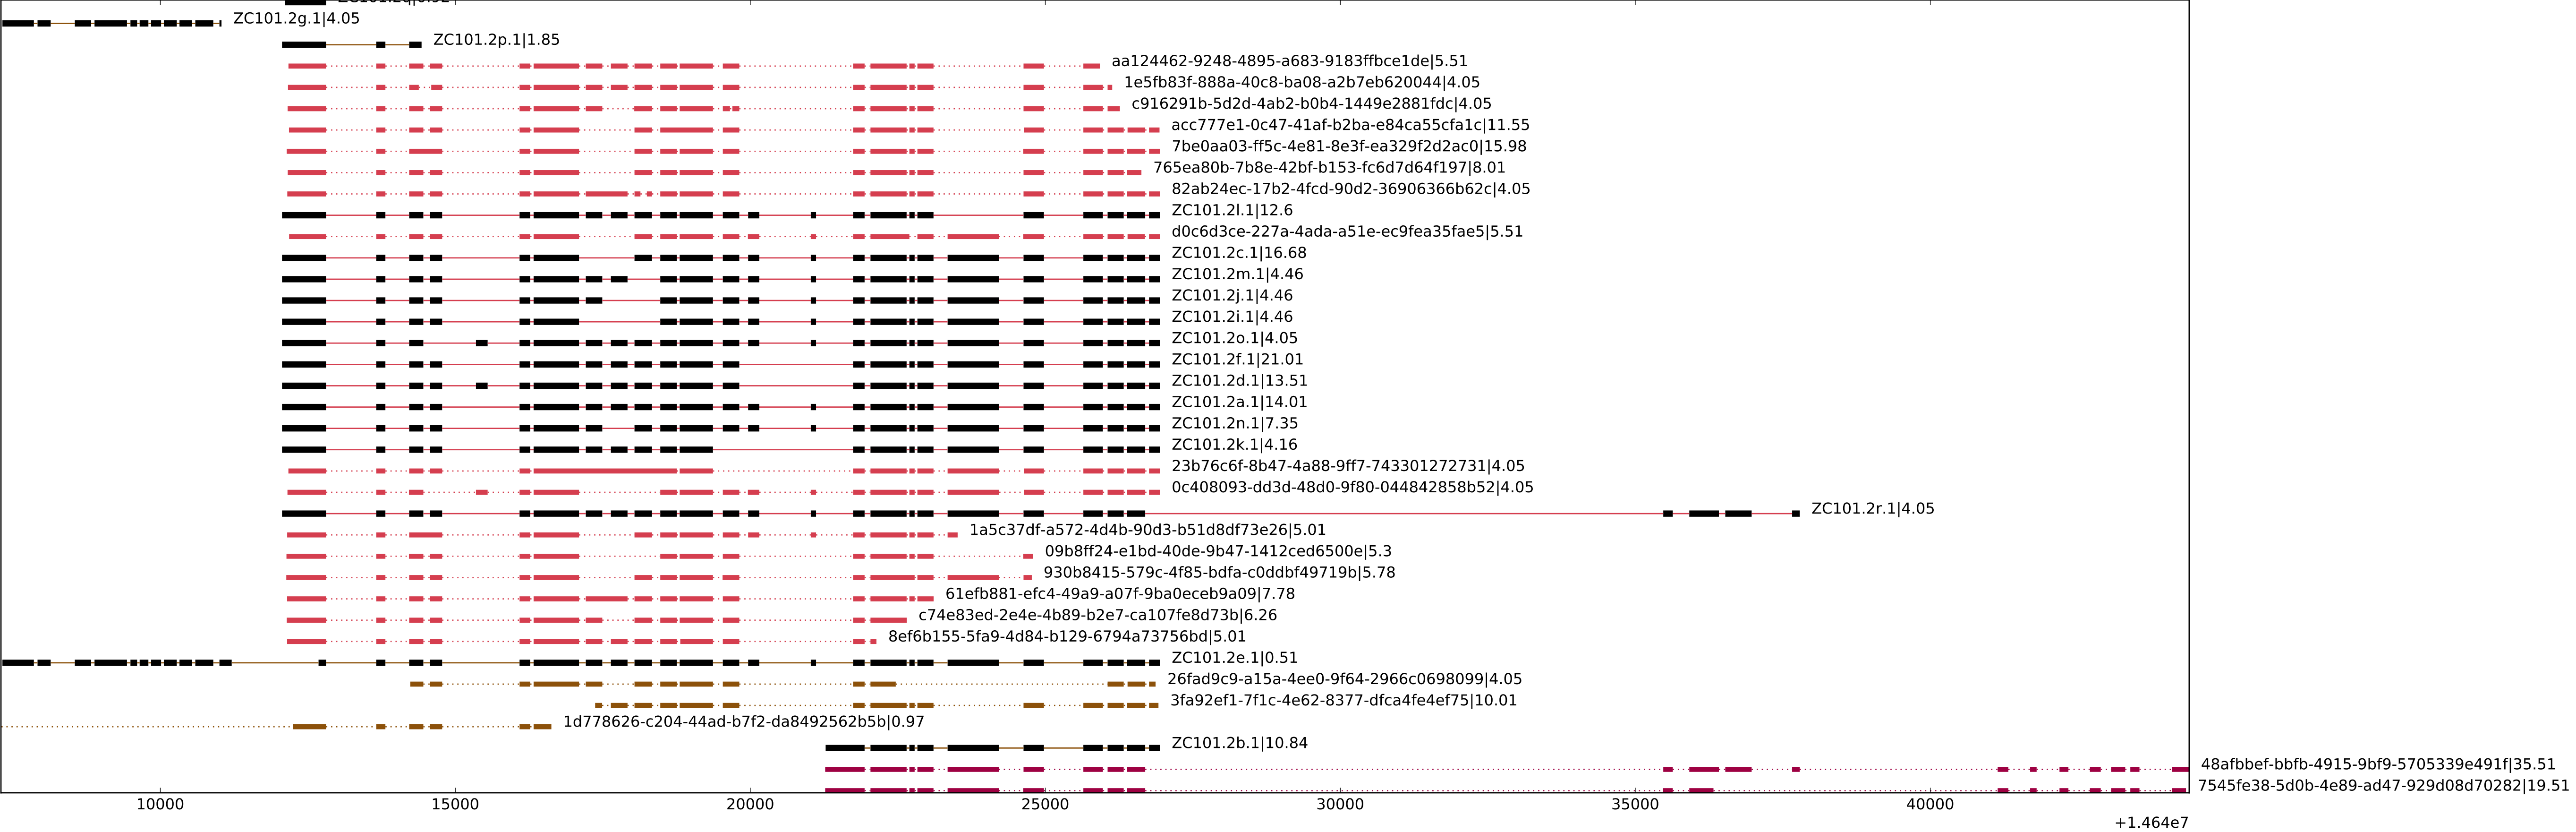

Supplement: Supplemental_Code.zip [file bb.pdf › trackcluster/test/genes/unc52/bb.pdf]
